# Supplementary material for: Proximity labeling of protein complexes and cell-type-specific organellar proteomes in Arabidopsis enabled by TurboID
Source: eLife journal article supplement (doi:10.7554/elife.47864), 2019-09-19
Supplement: supp1 [file elife-47864-supp1-v3.pdf]

Extended supplement – uncropped immunoblots

Figure 1B

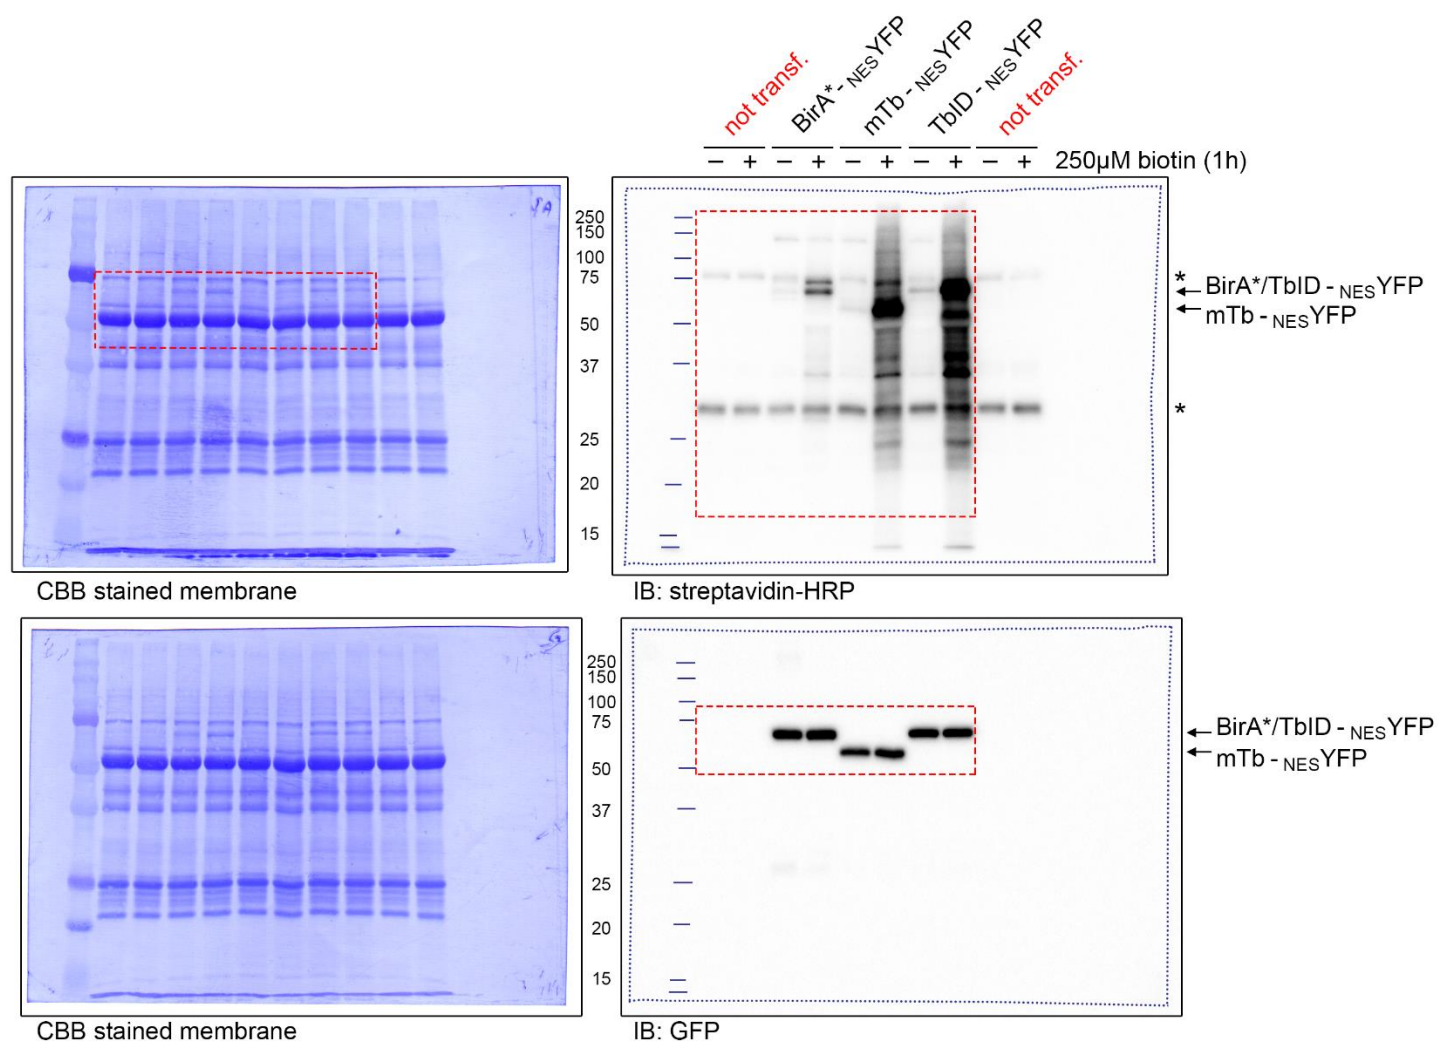

Figure 1C

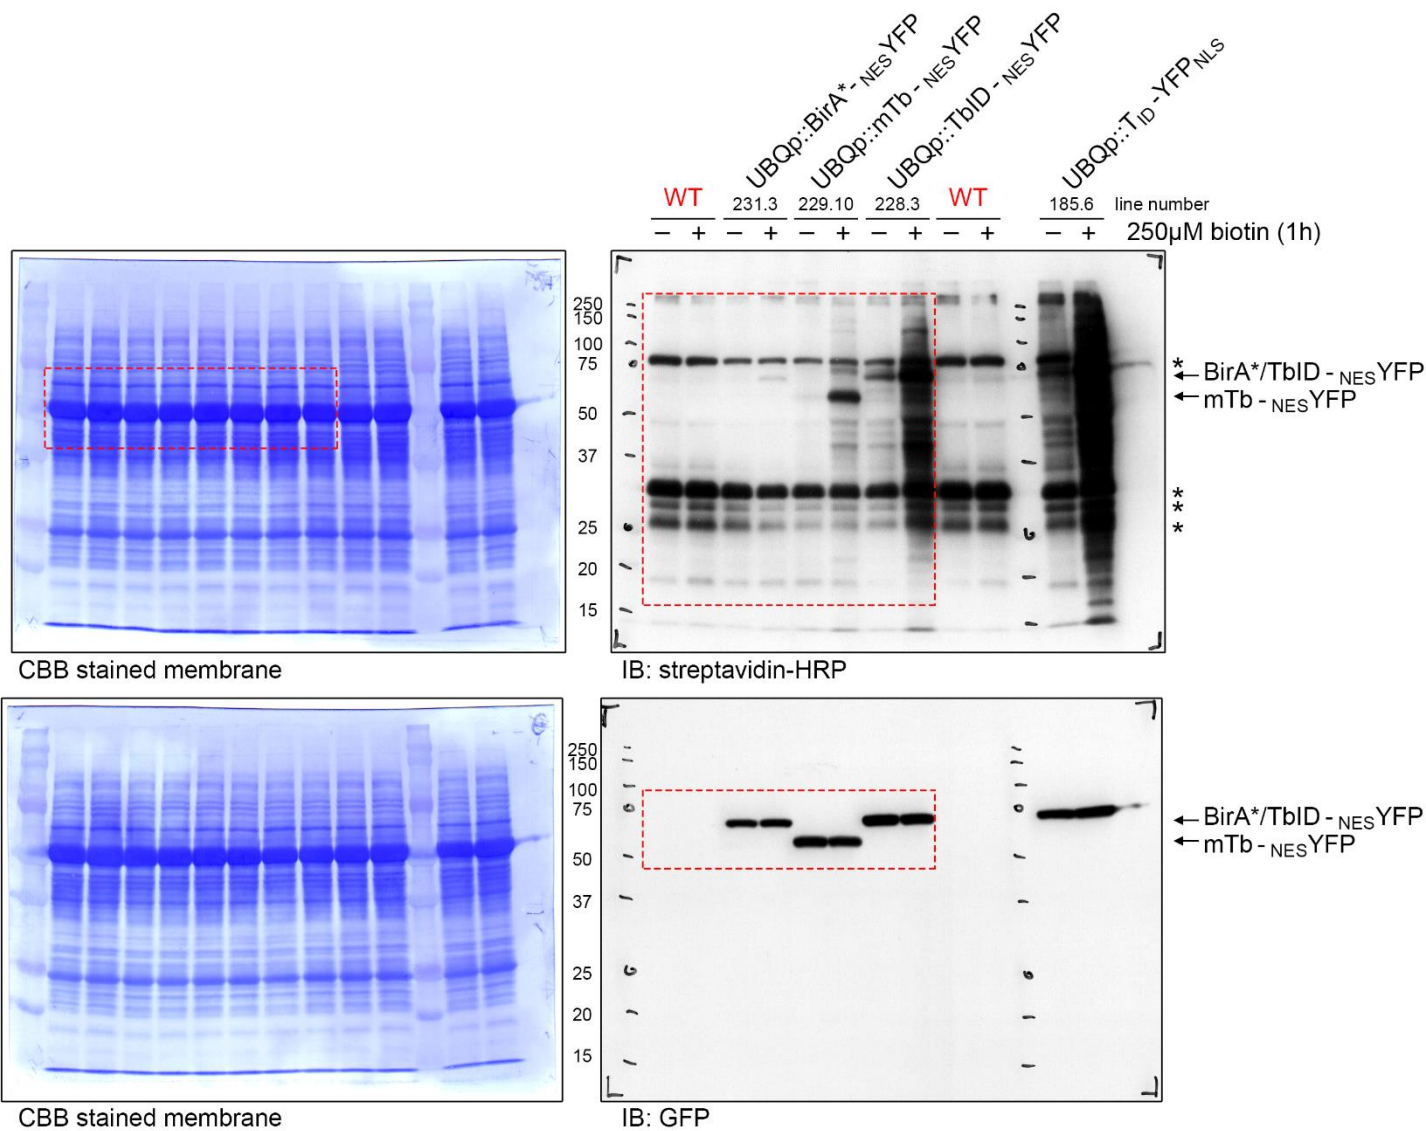

Figure 1 – figure supplement 1

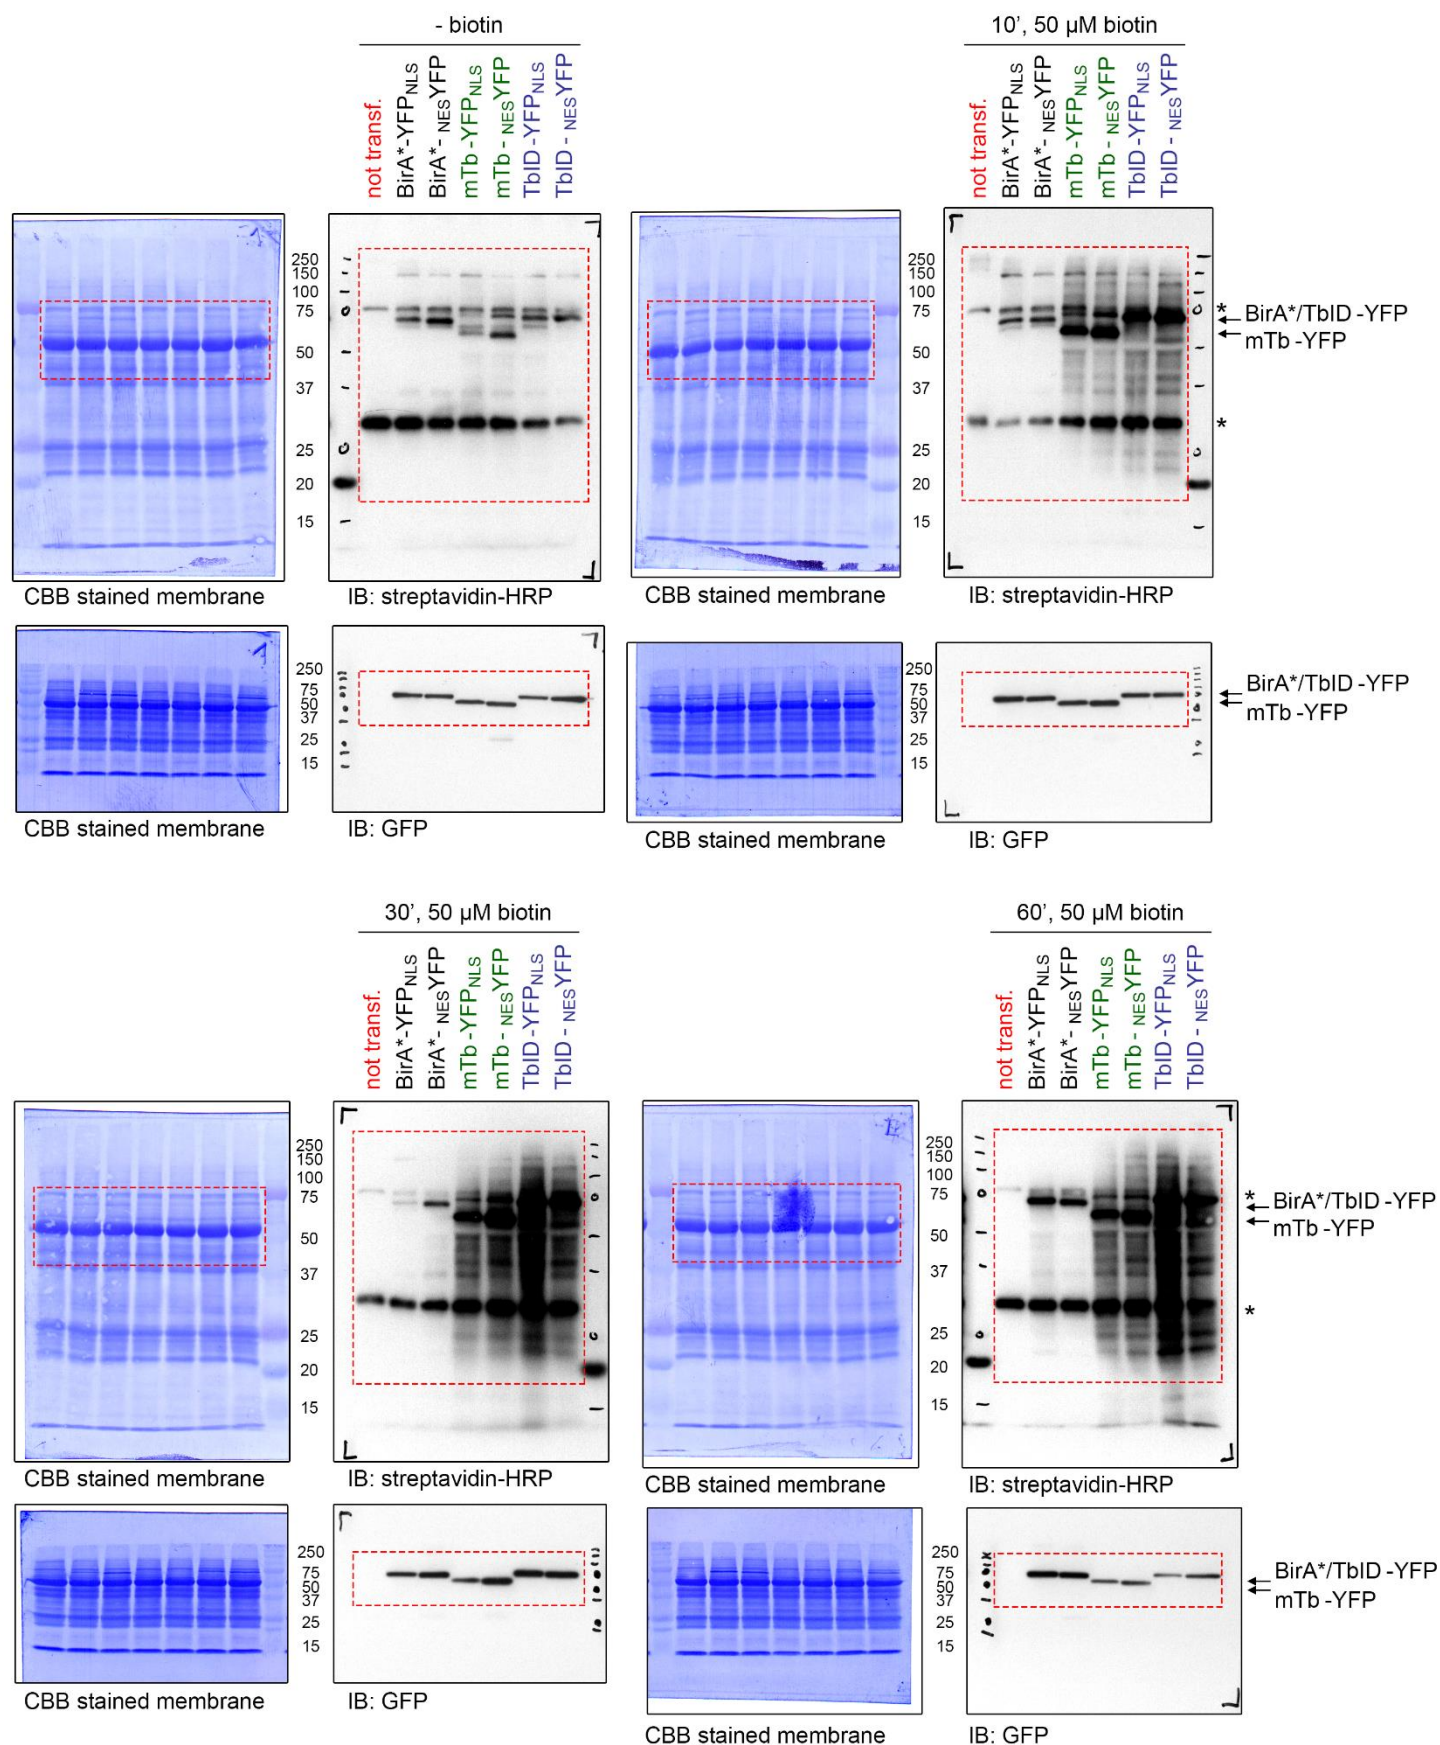



Figure 1 – figure supplement 3

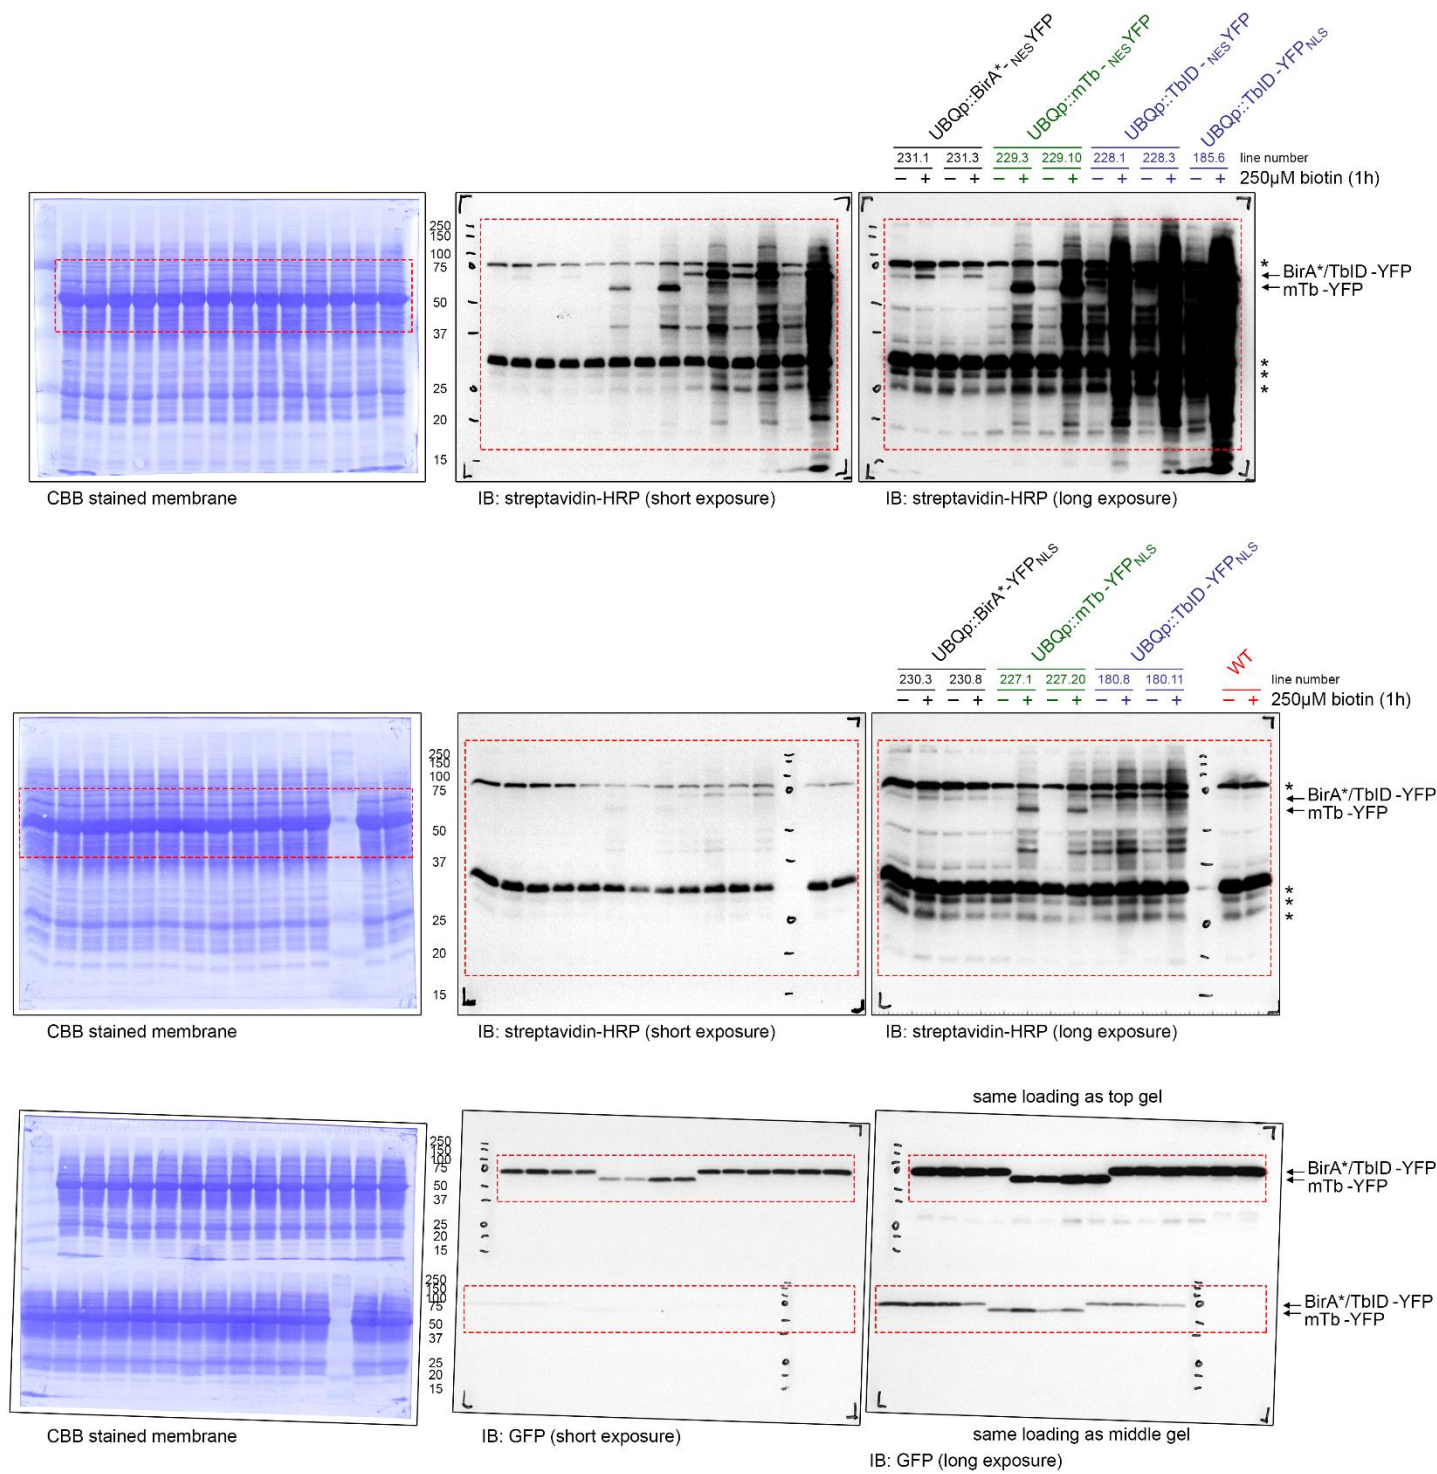

Figure 2A

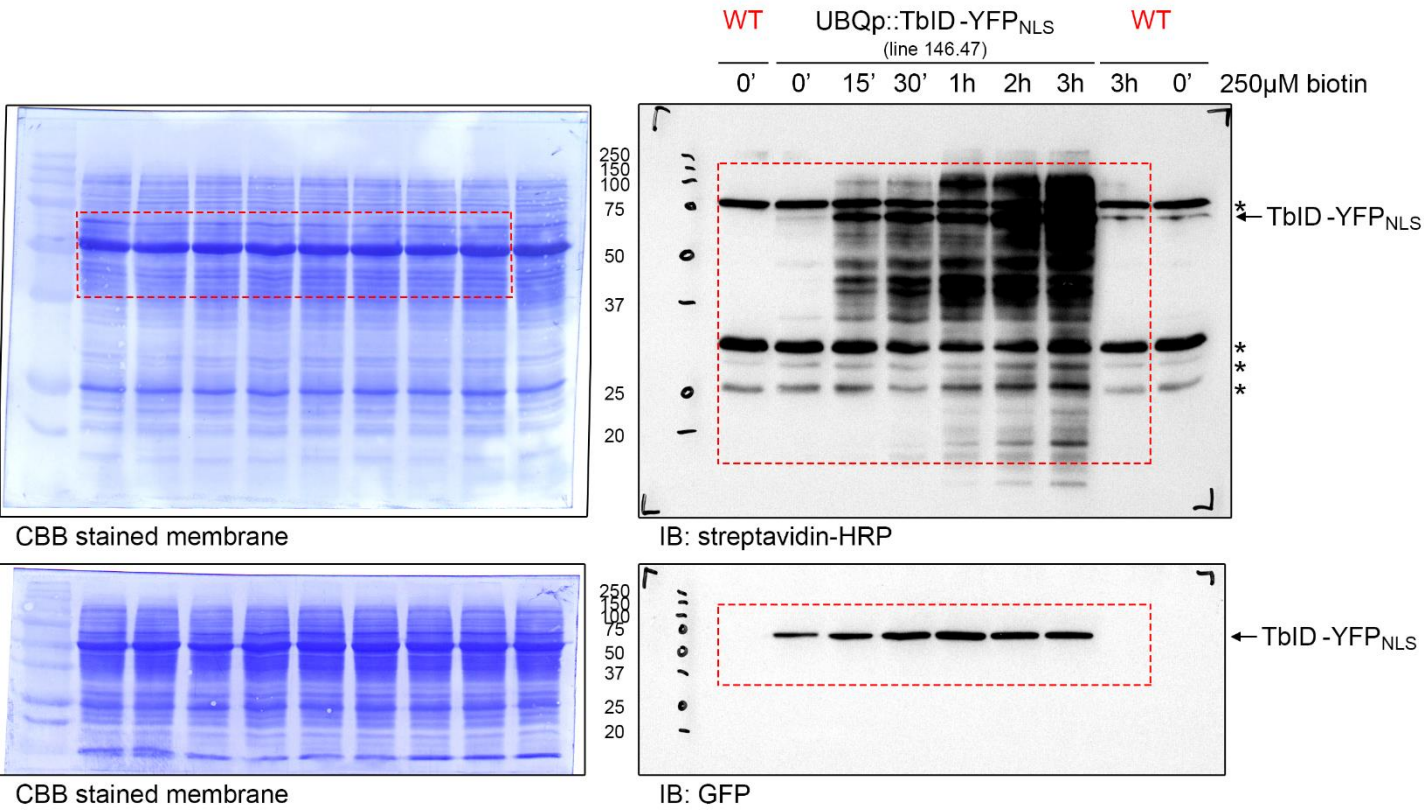

Figure 2B

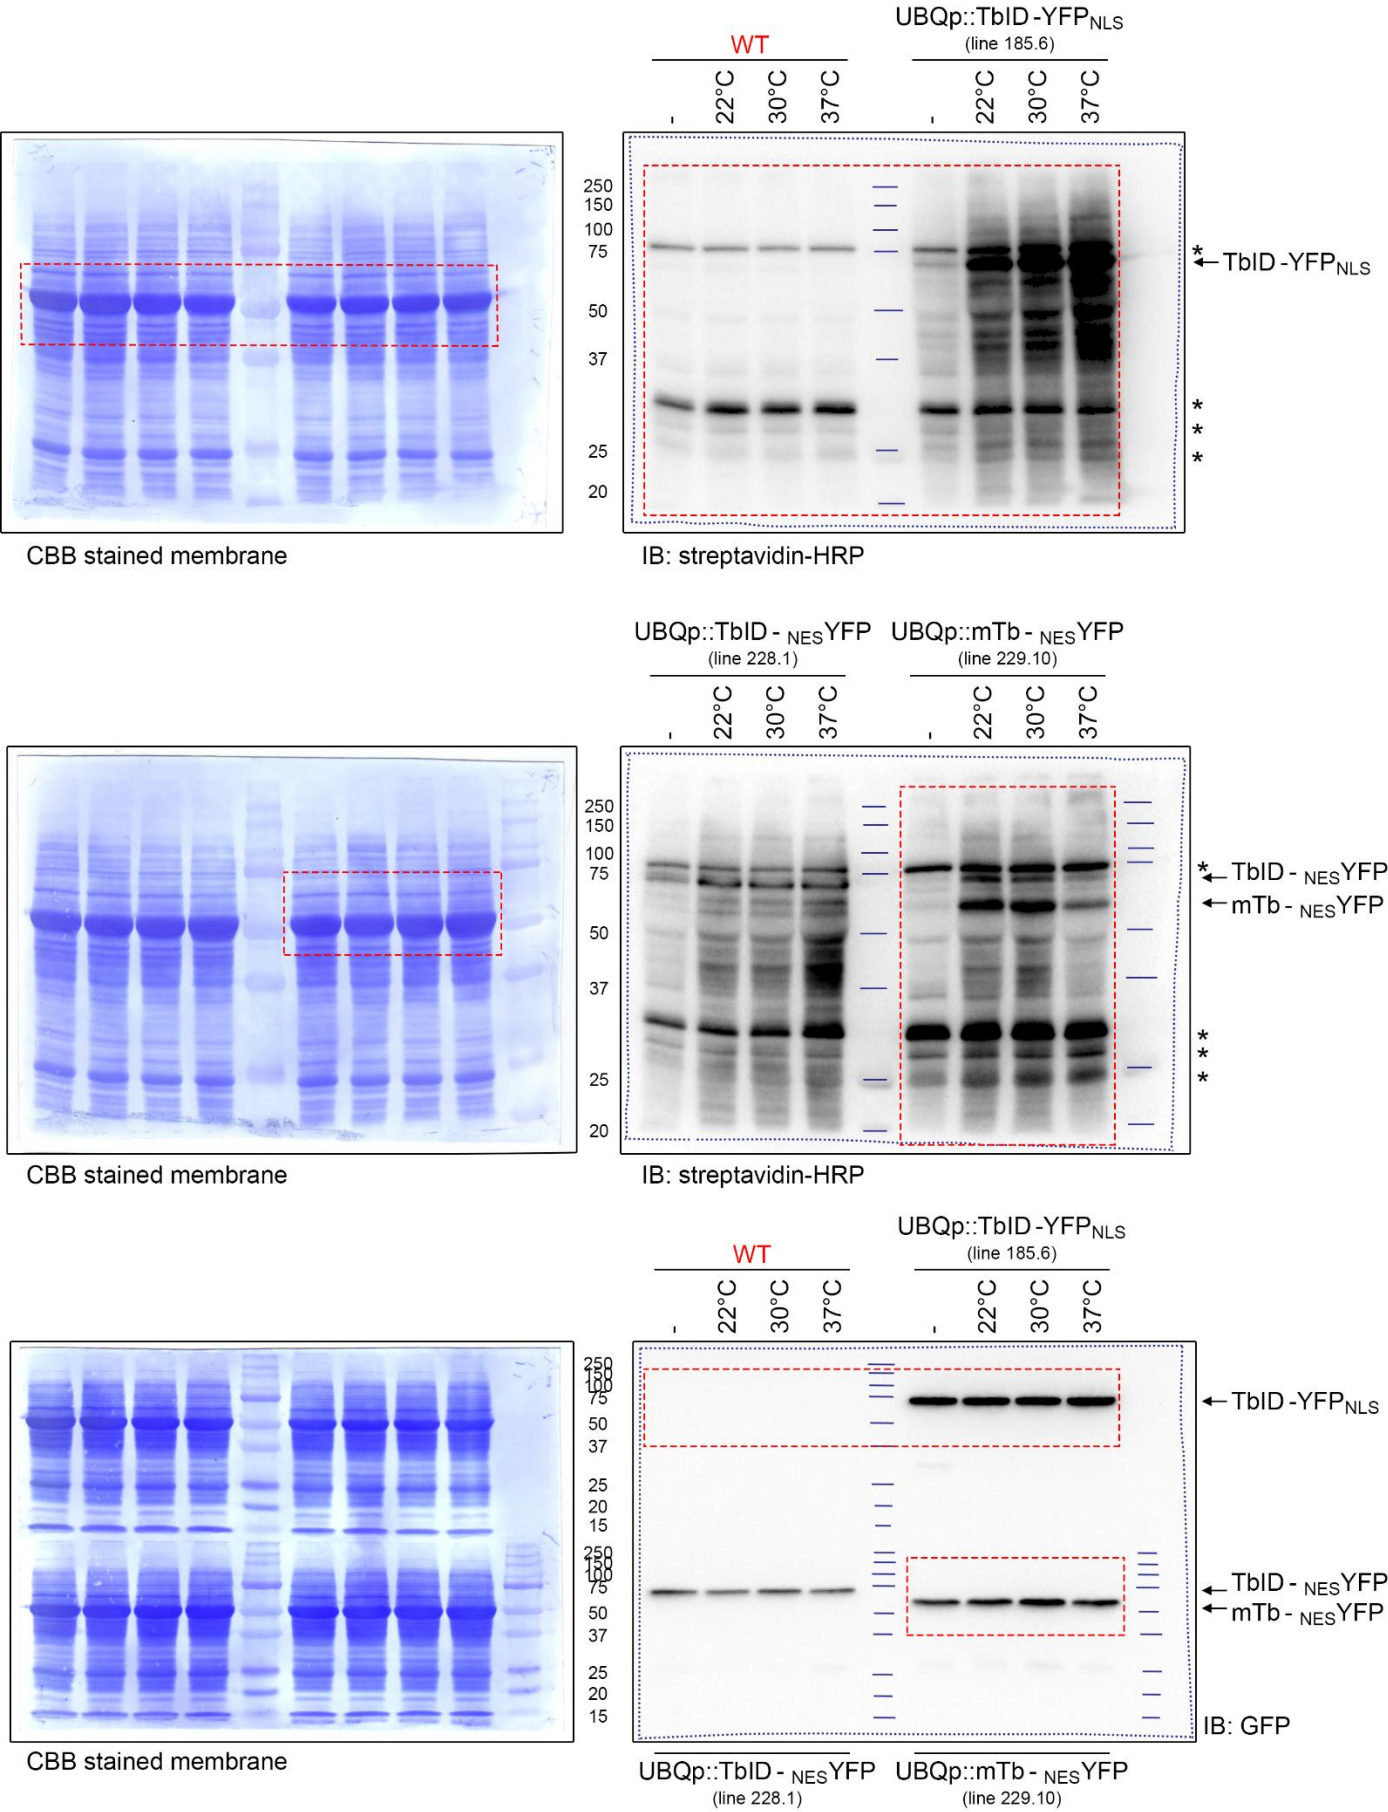

Figure supplement – uncropped immunoblots: page 6



Figure 2C and Figure 2 – figure supplement 3

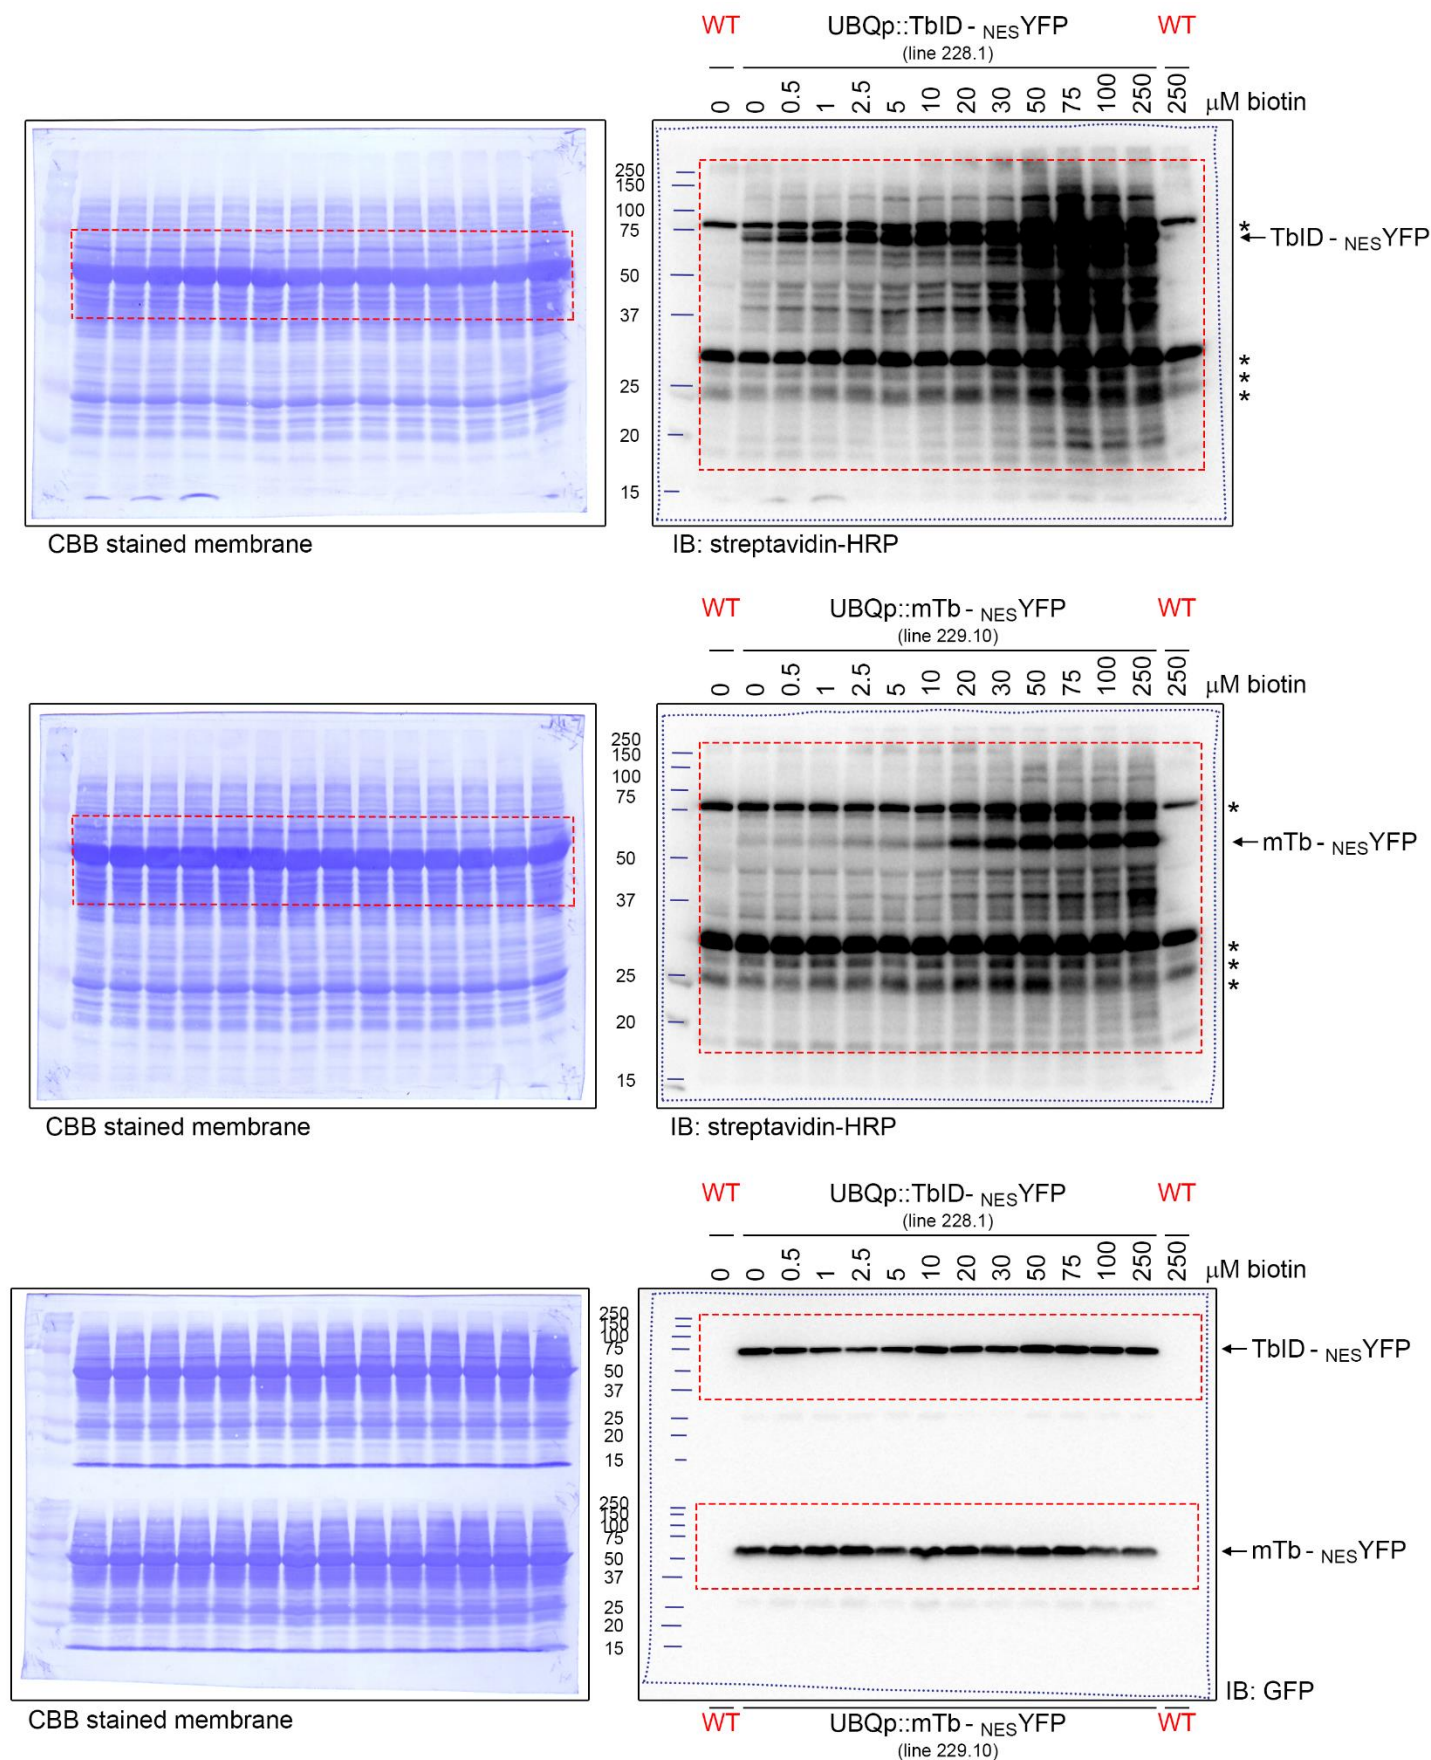

Figure 2D

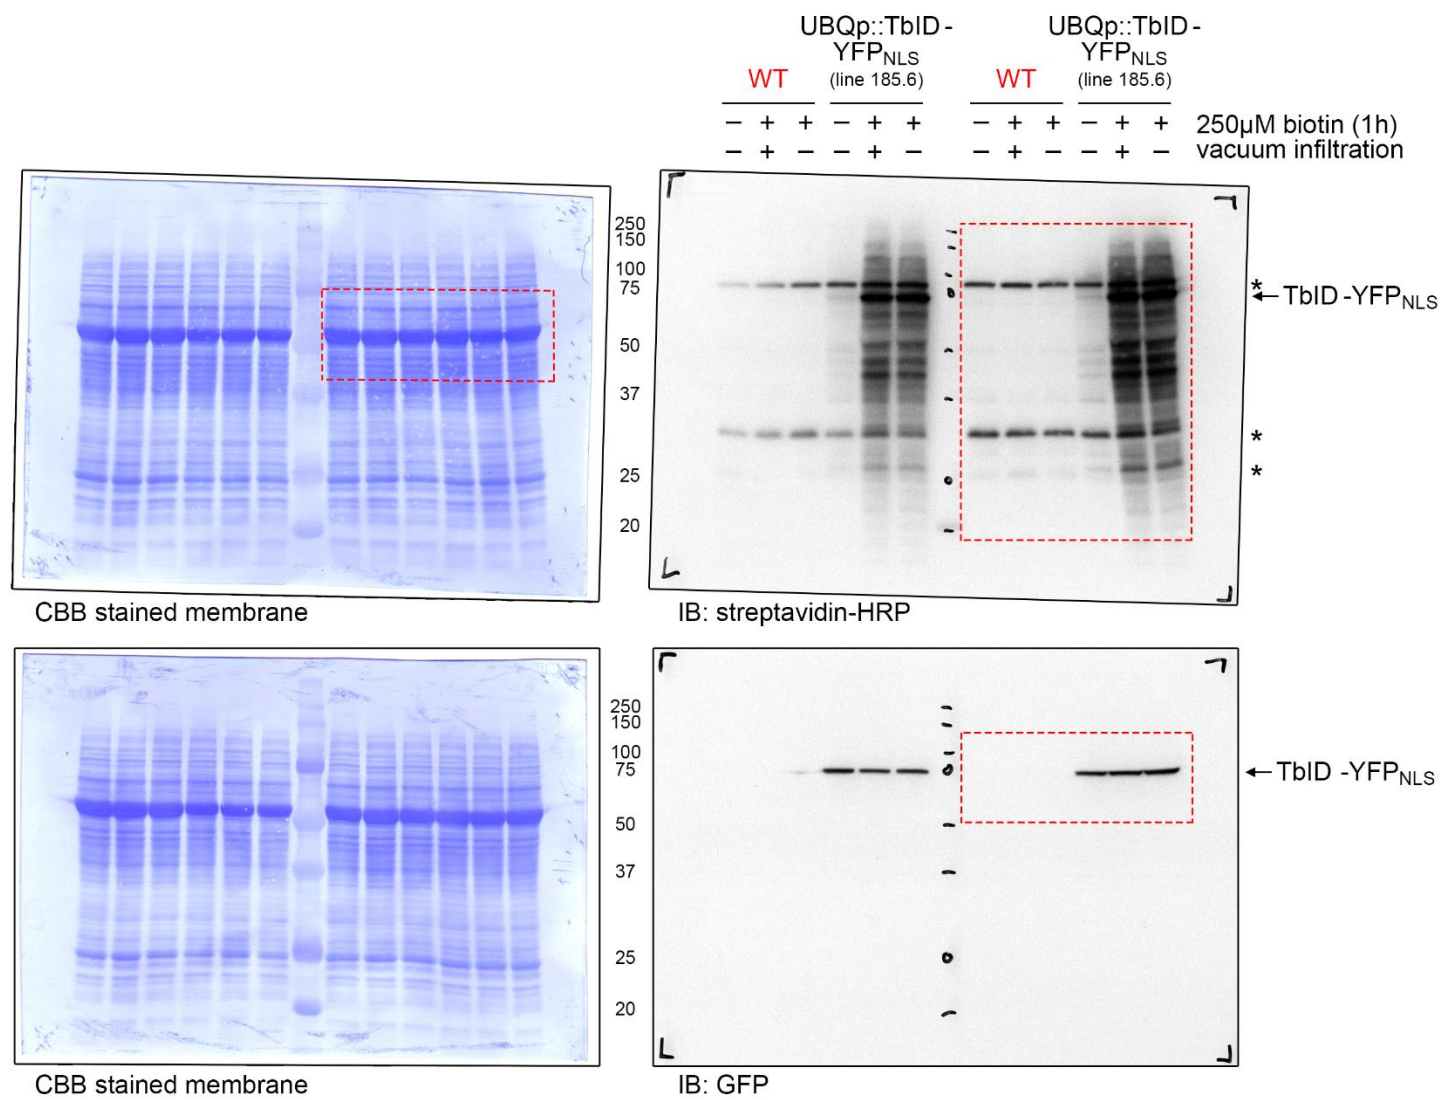



Figure 2 – figure supplement 1

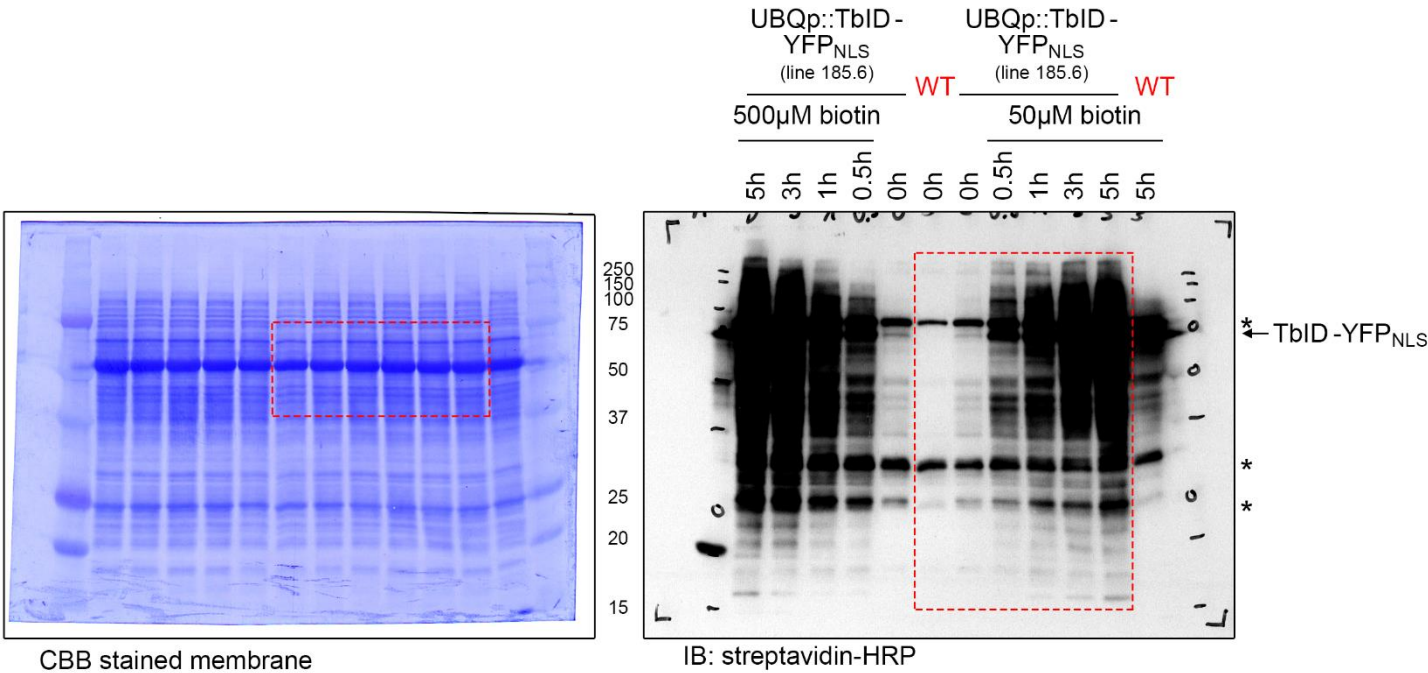

Figure 2 – figure supplement 2

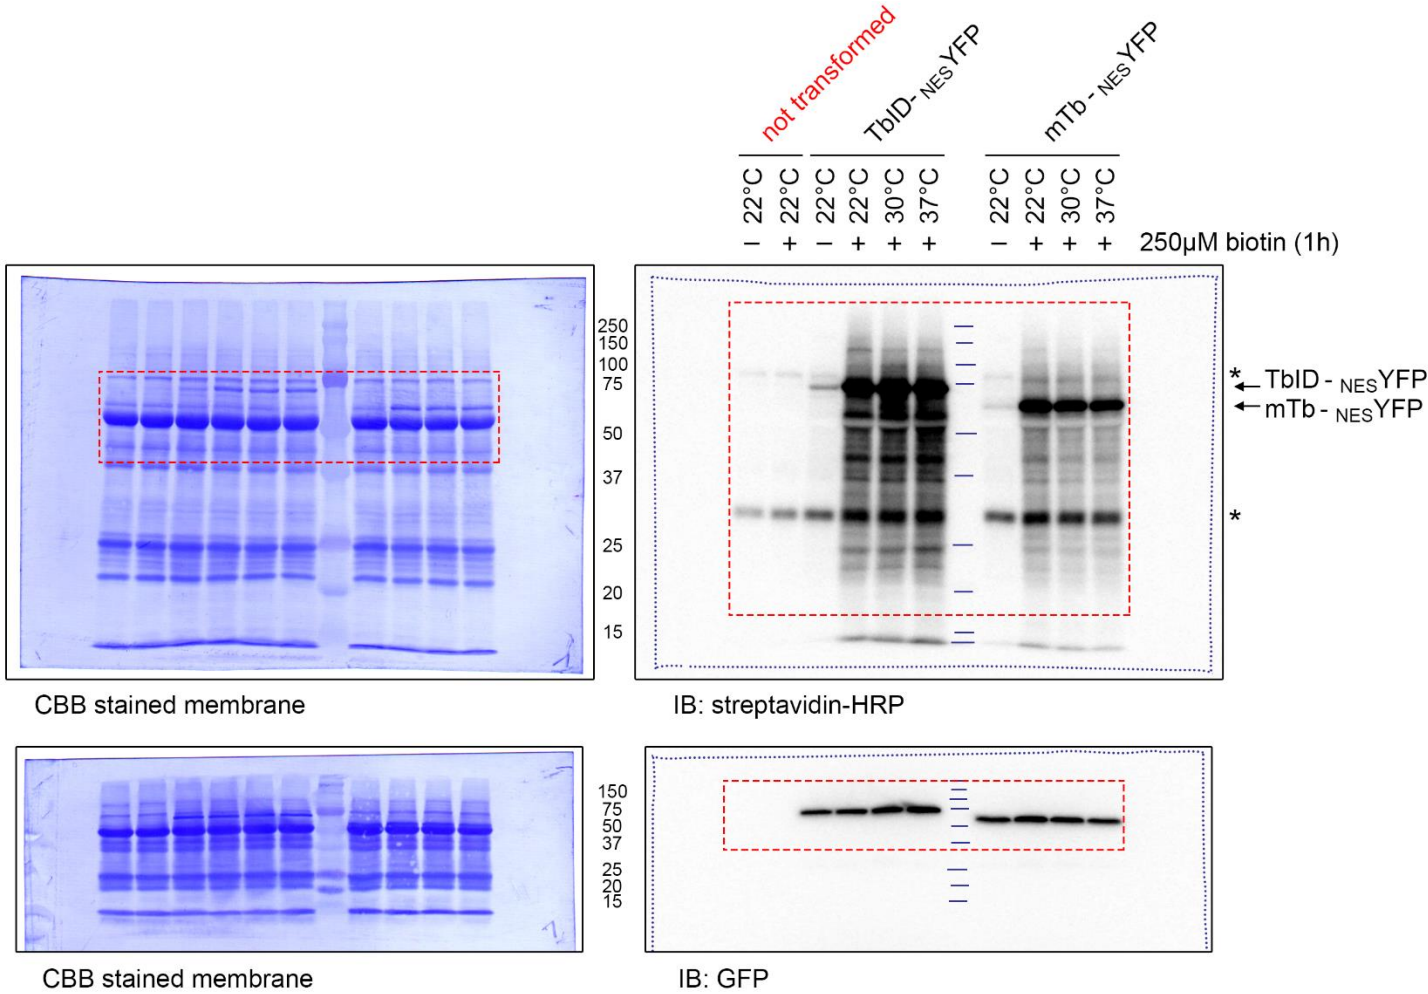

**seedling root**

CBB stained membrane

IB: streptavidin-HRP

IB: GFP

UbqP::TbID-YFP-NLS (line 185.6)

WT

250µM biotin (1h) vacuum infiltration

UbqP::TbID-YFP-NLS (line 185.6)

WT

250µM biotin (1h) vacuum infiltration

**mature leaf**

CBB stained membrane

IB: streptavidin-HRP

IB: GFP

UbqP::TbID-YFP-NLS (line 185.6)

WT

250µM biotin (1h) vacuum infiltration

UbqP::TbID-YFP-NLS (line 185.6)

WT

250µM biotin (1h) vacuum infiltration



Figure 3 – figure supplement 1

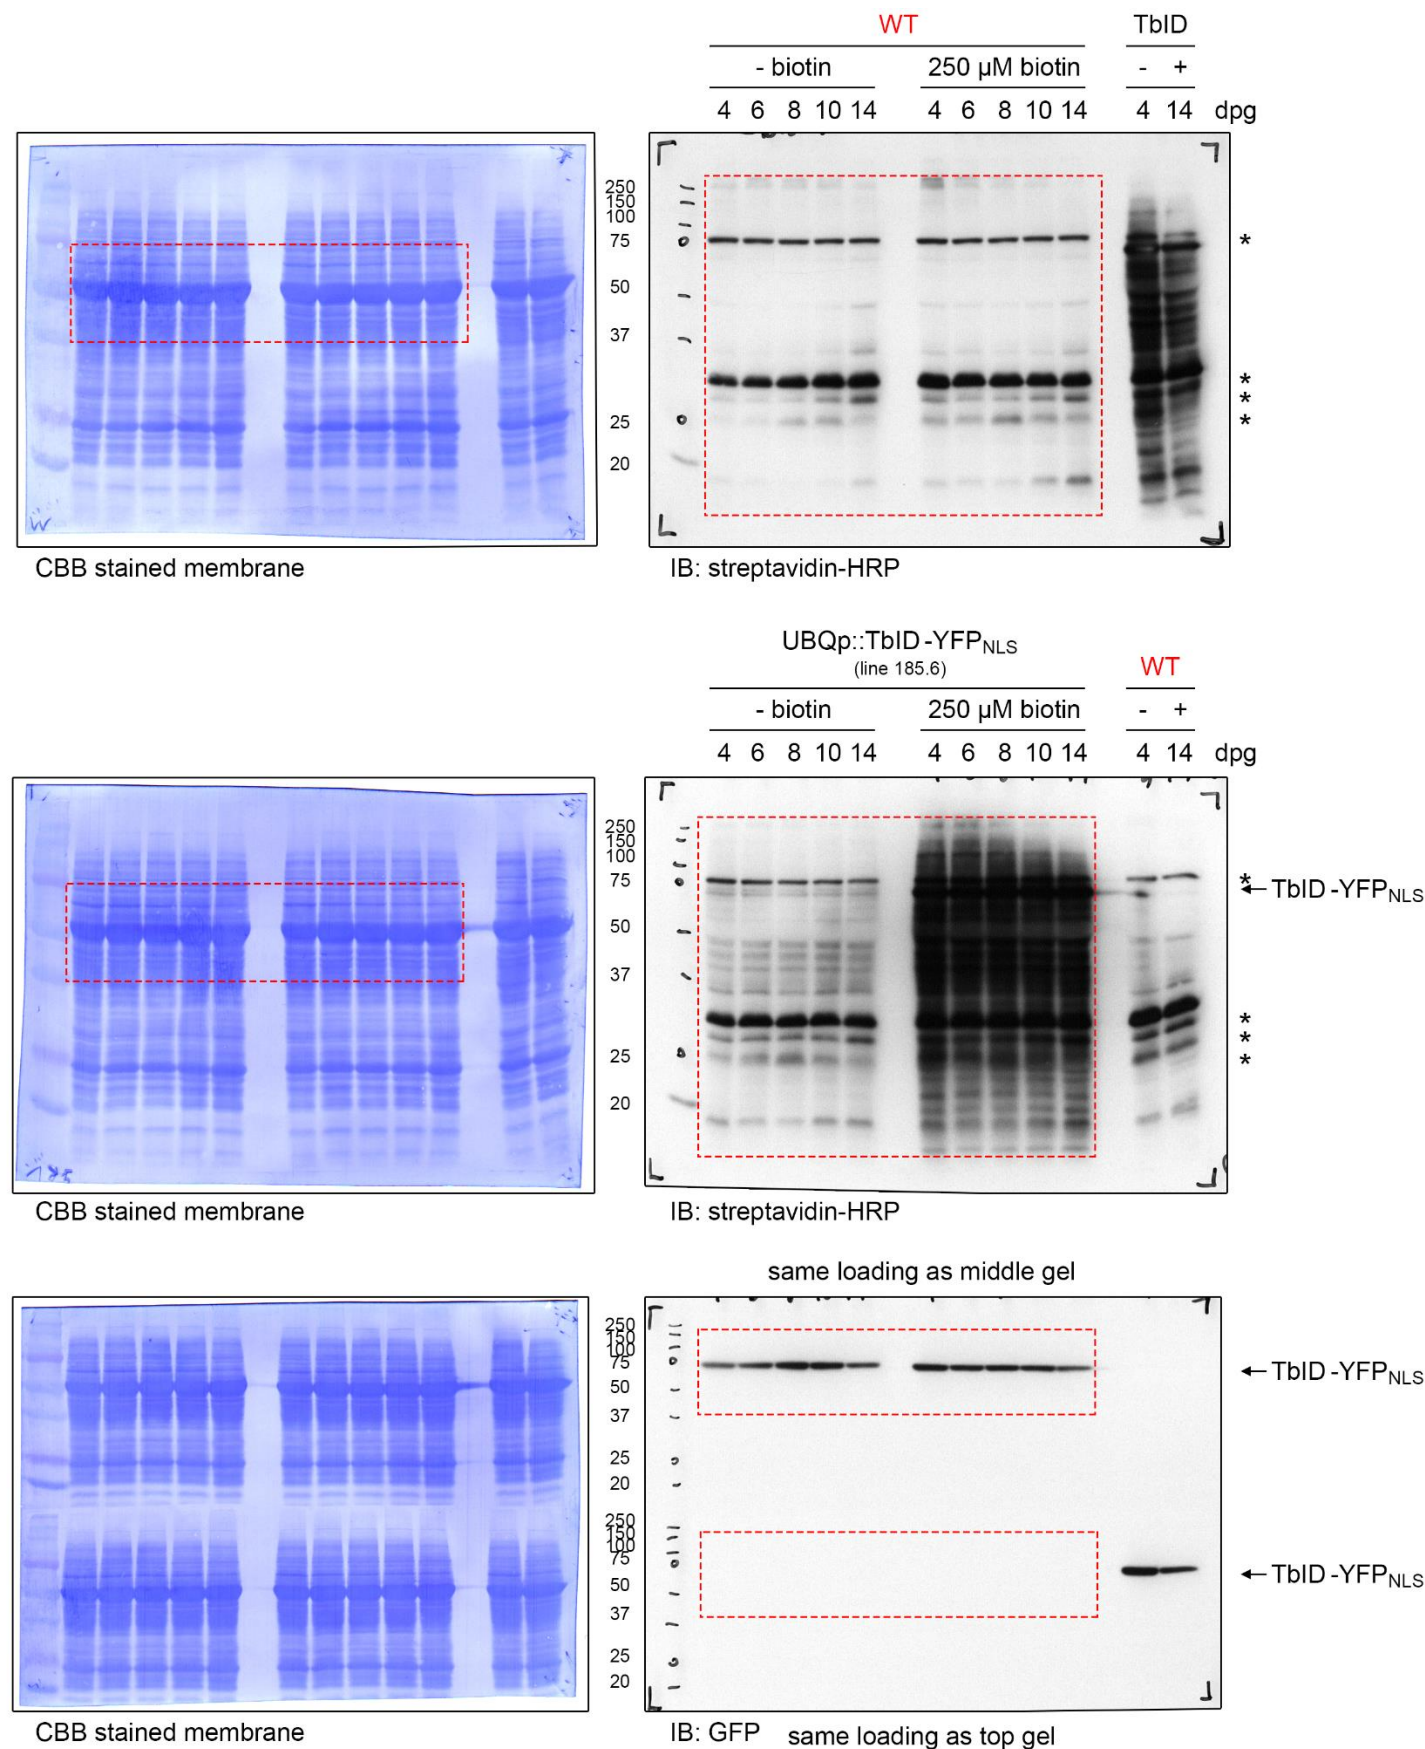



Figure 3 – figure supplement 2

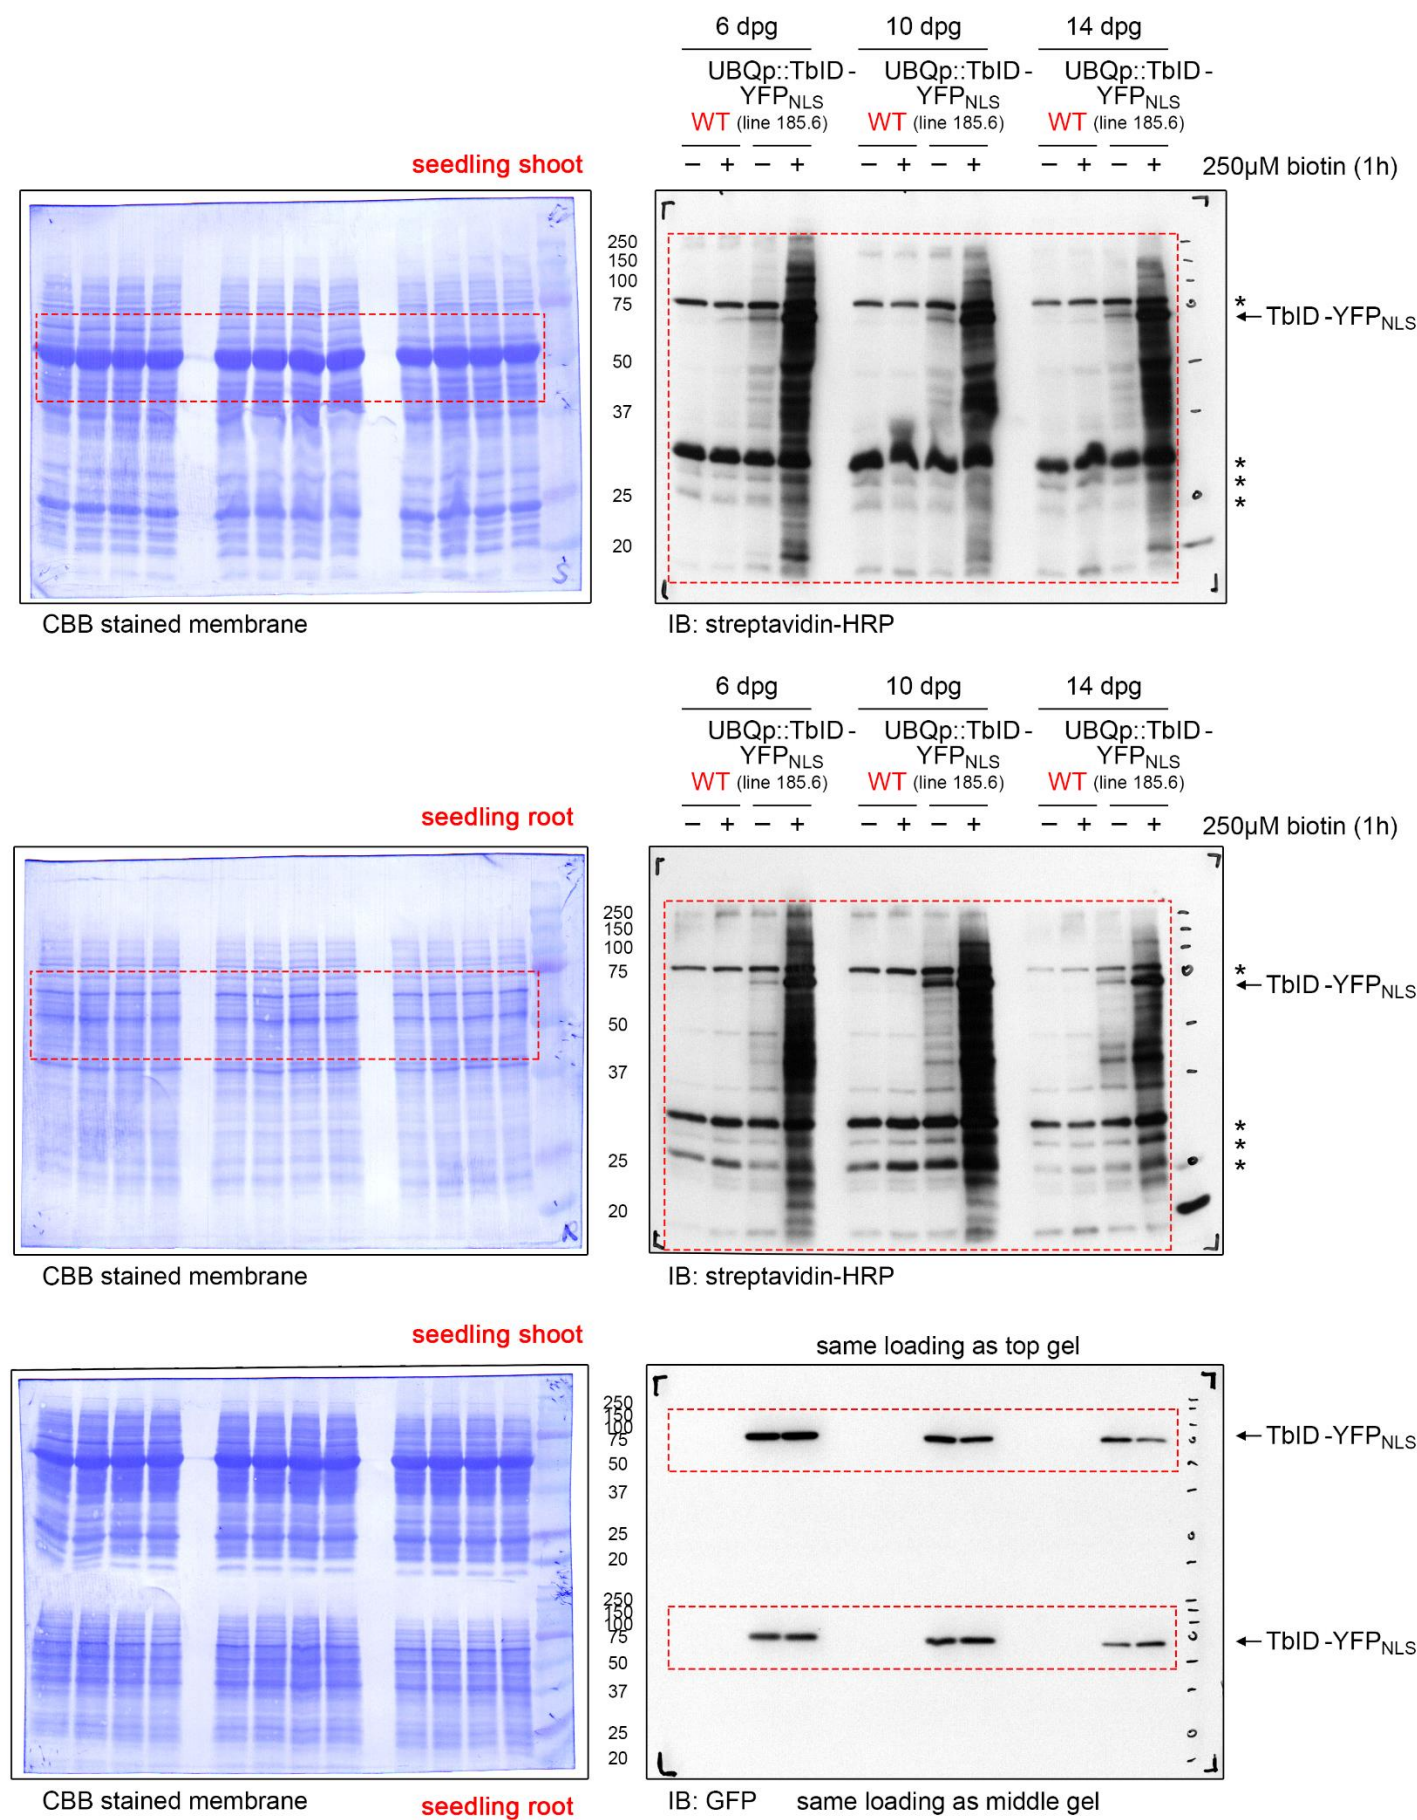

Figure 4B

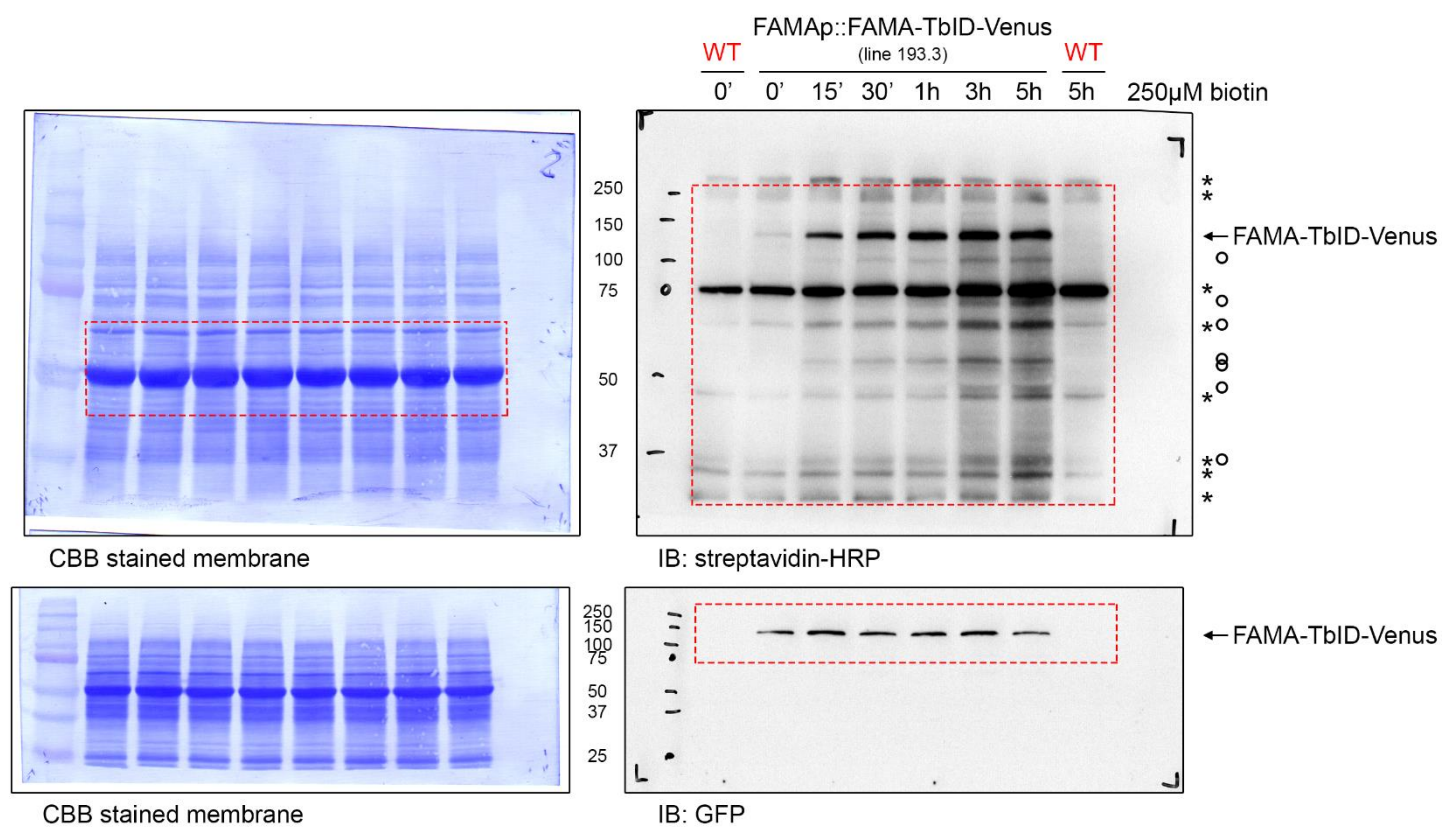

Figure 4 – figure supplement 3

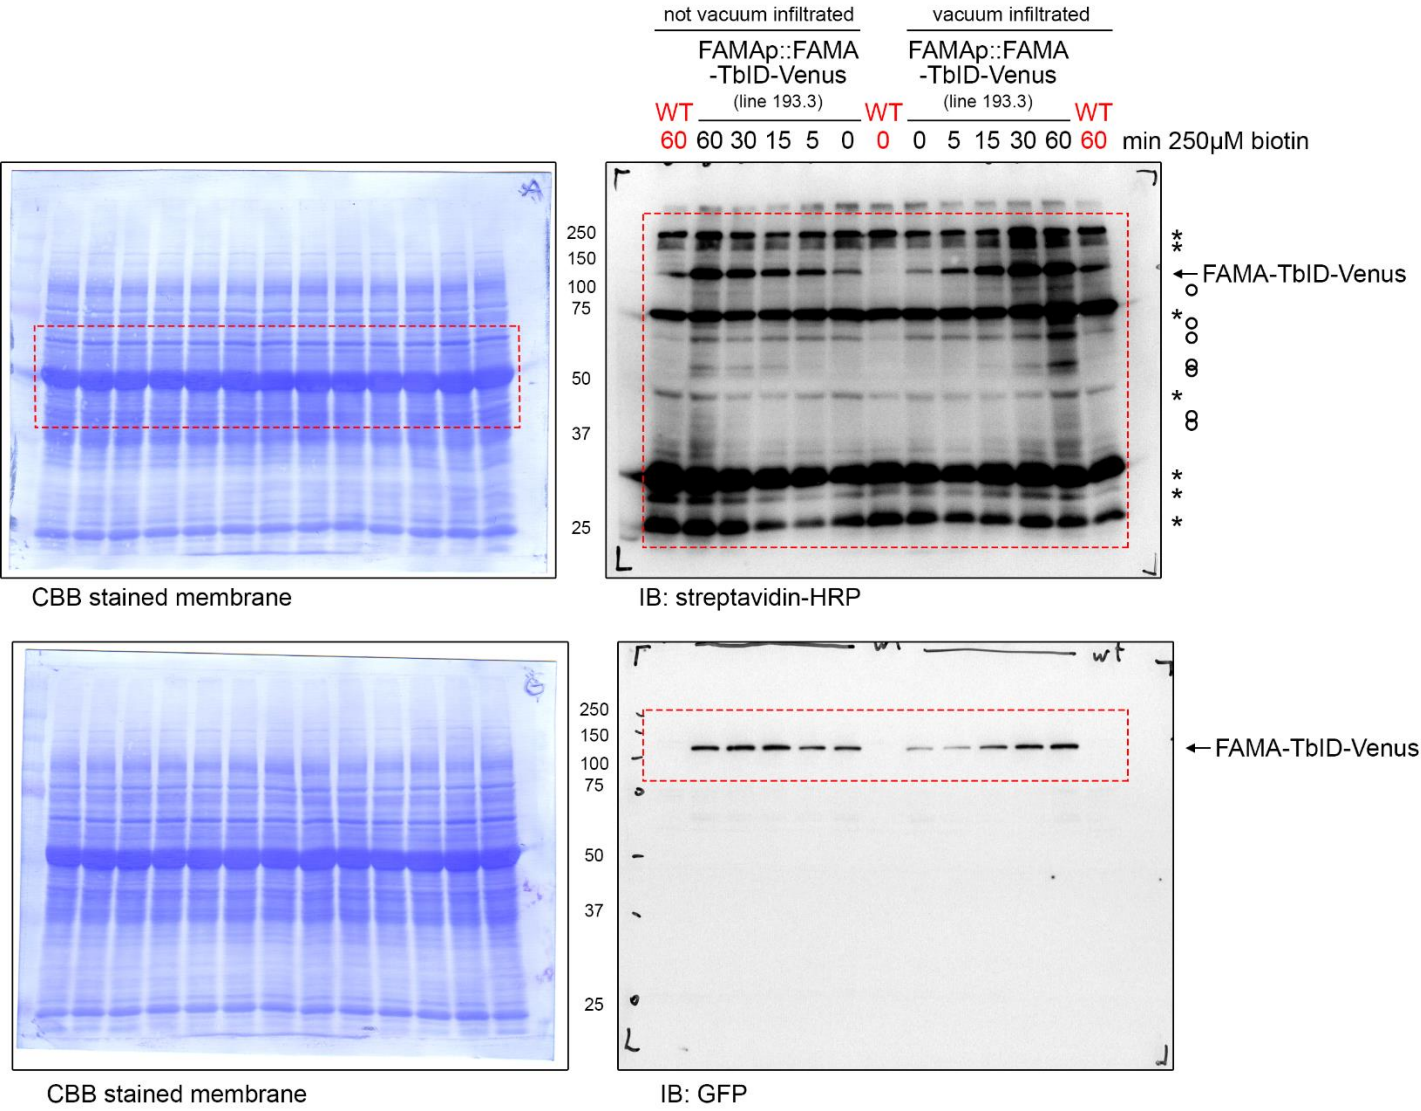



Figure 4 – figure supplement 4

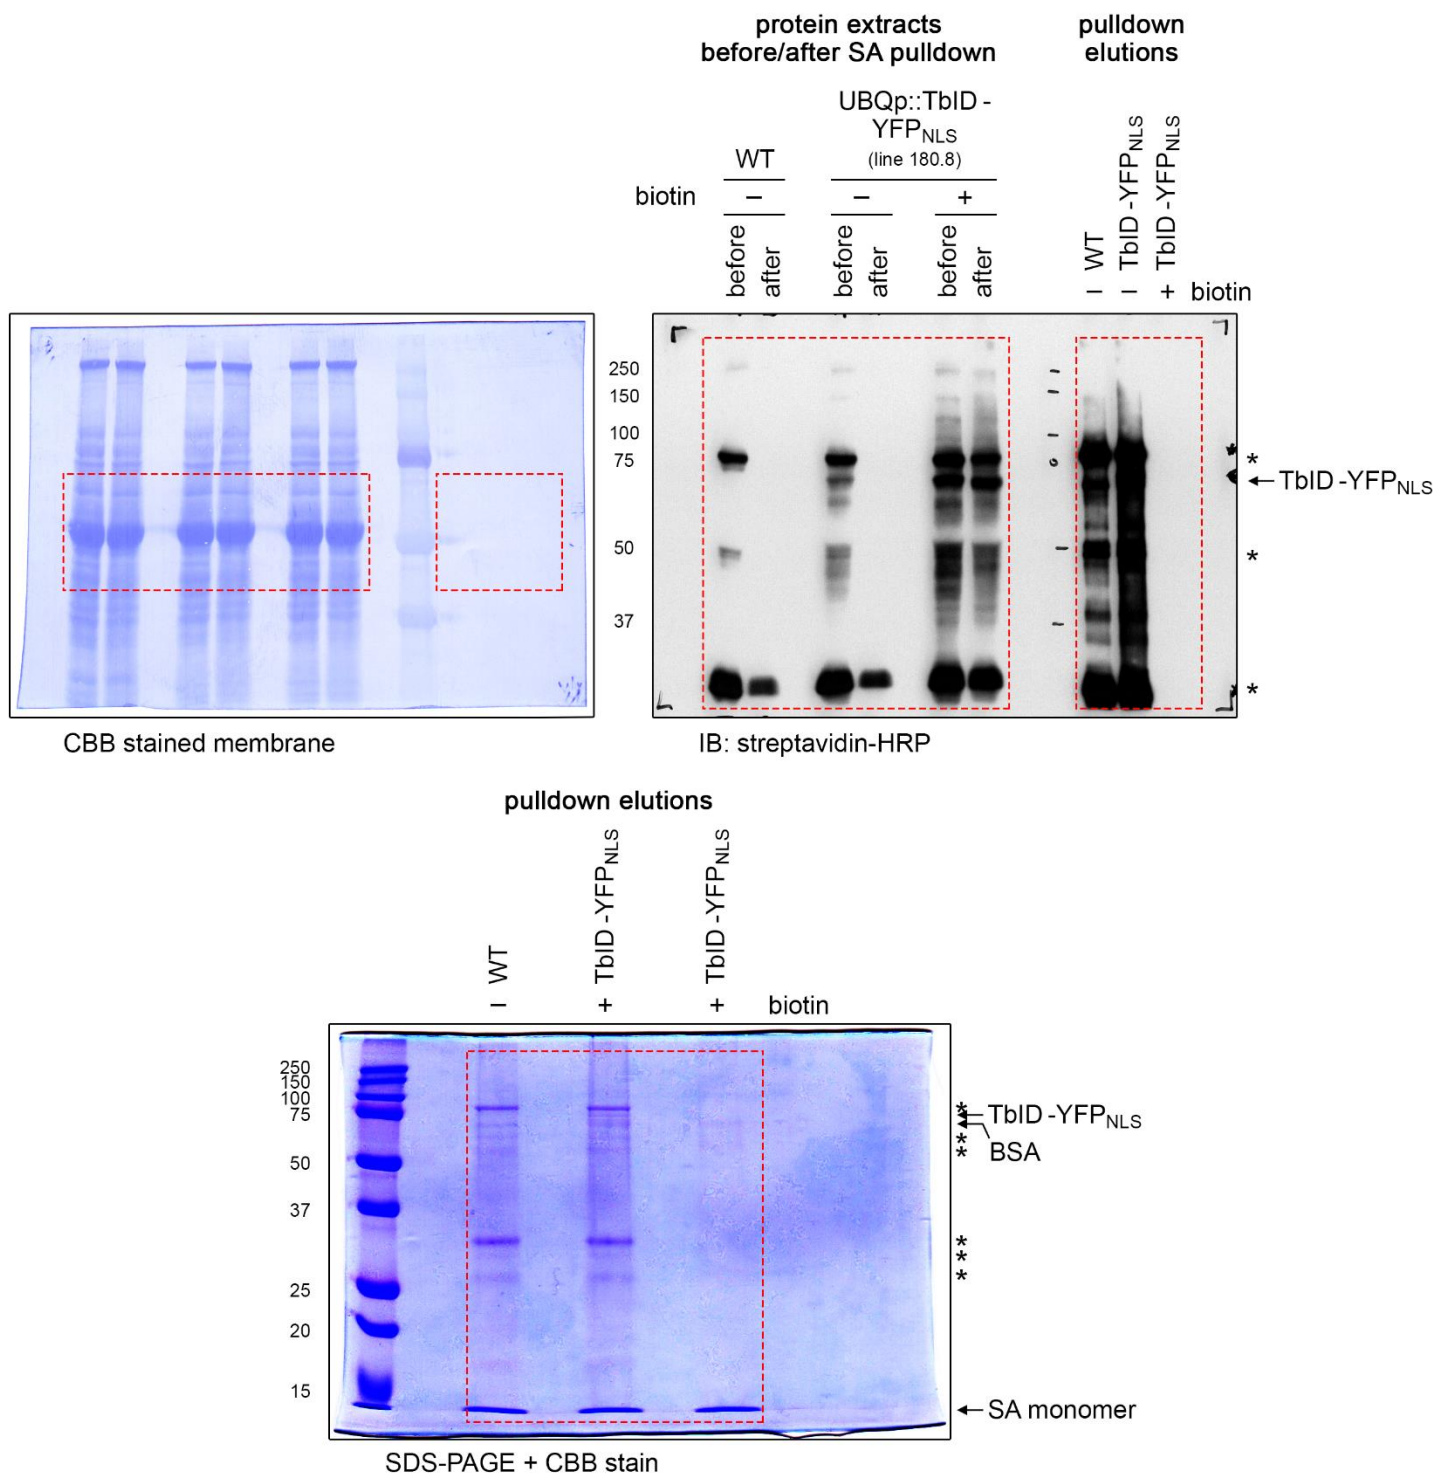

Figure 4 – figure supplement 5

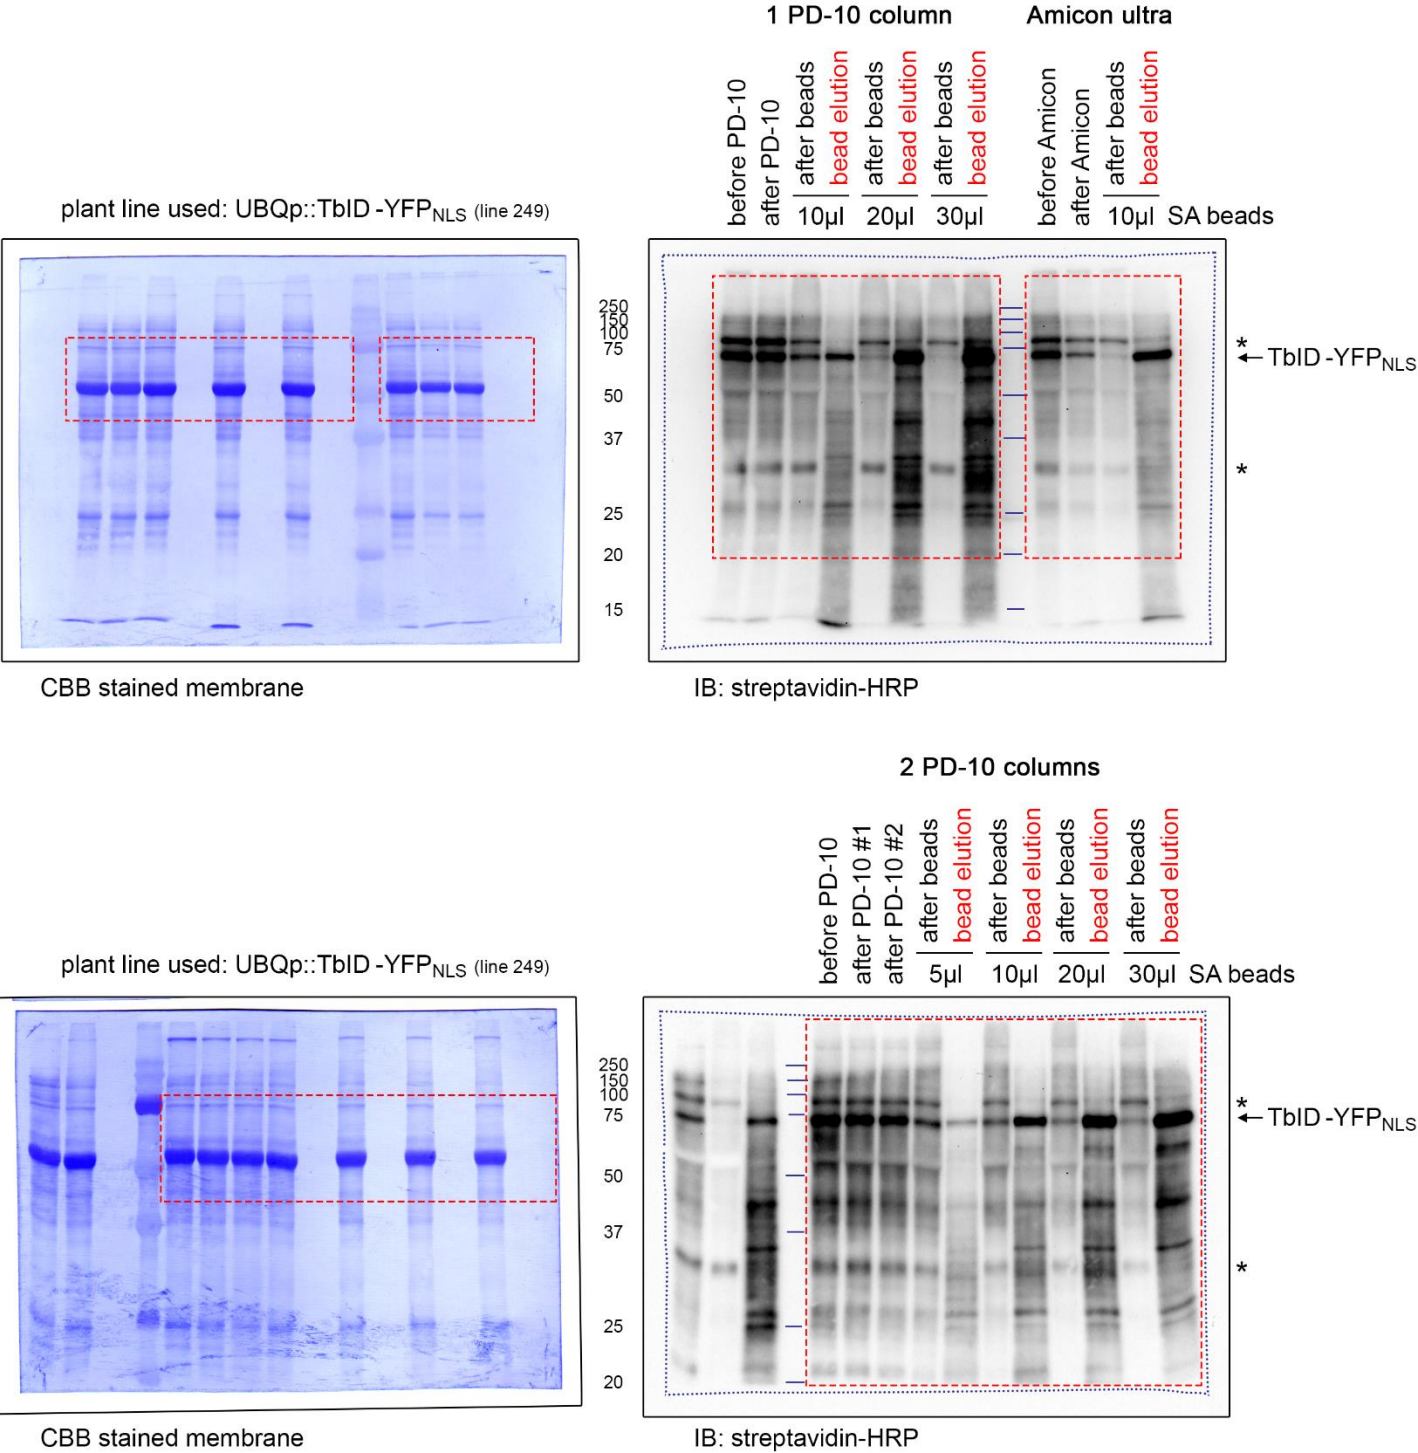

Figure 4 – figure supplement 6

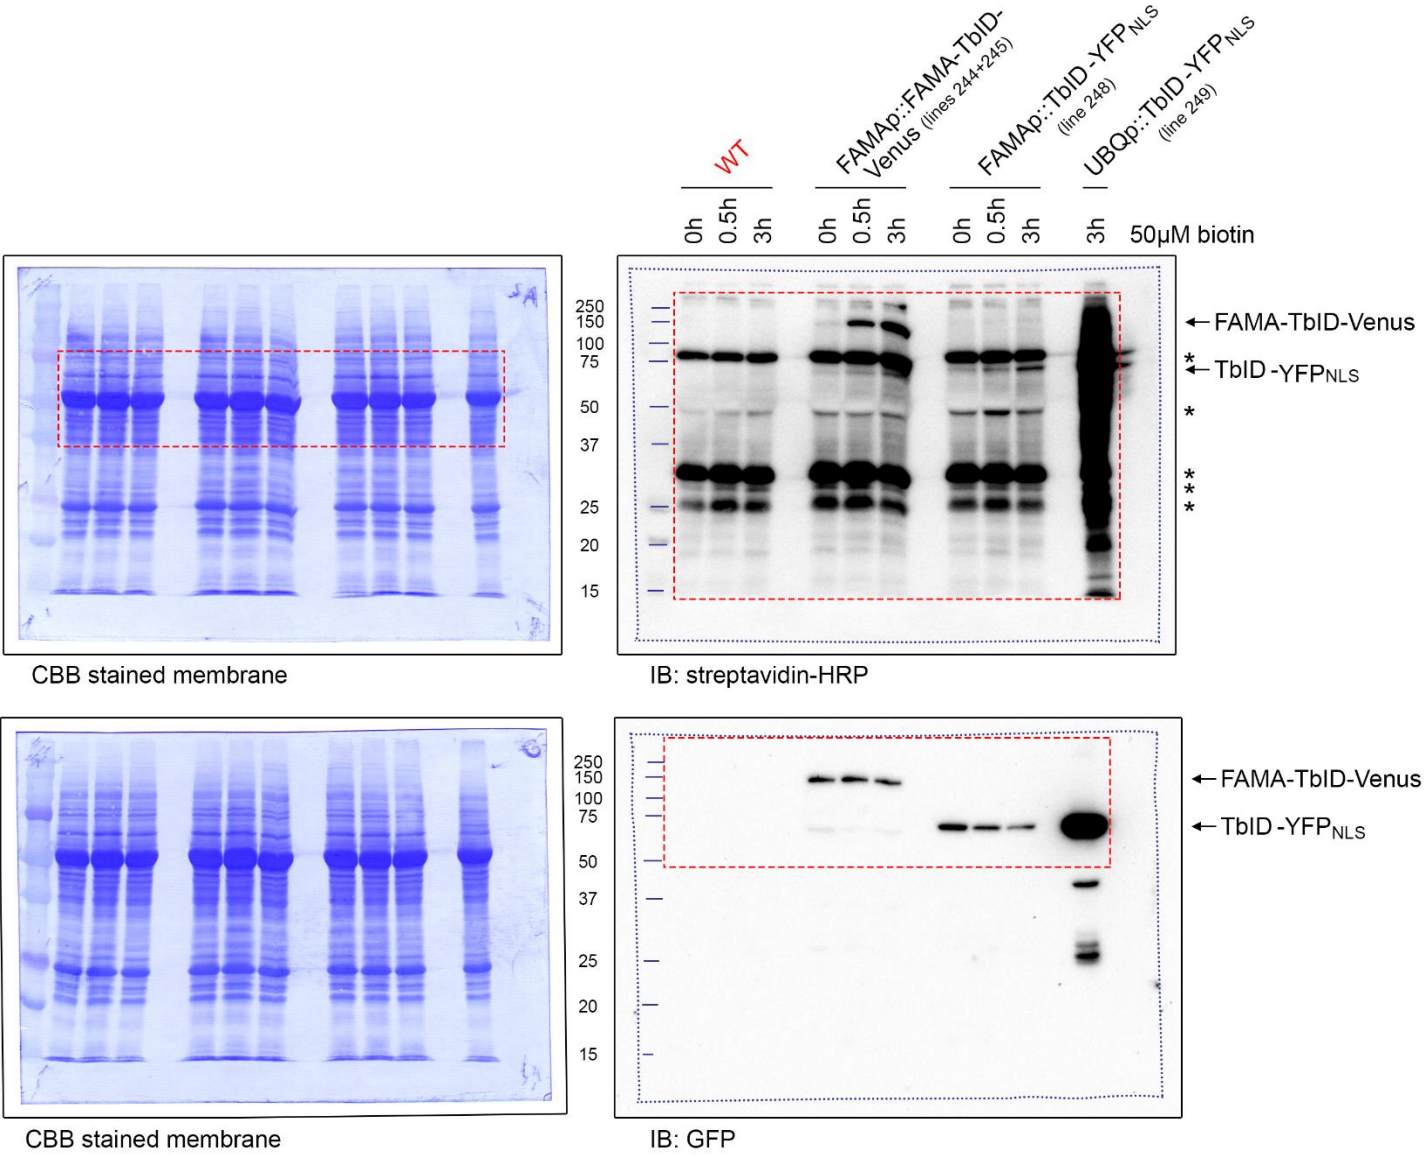



Figure 4 – figure supplement 7

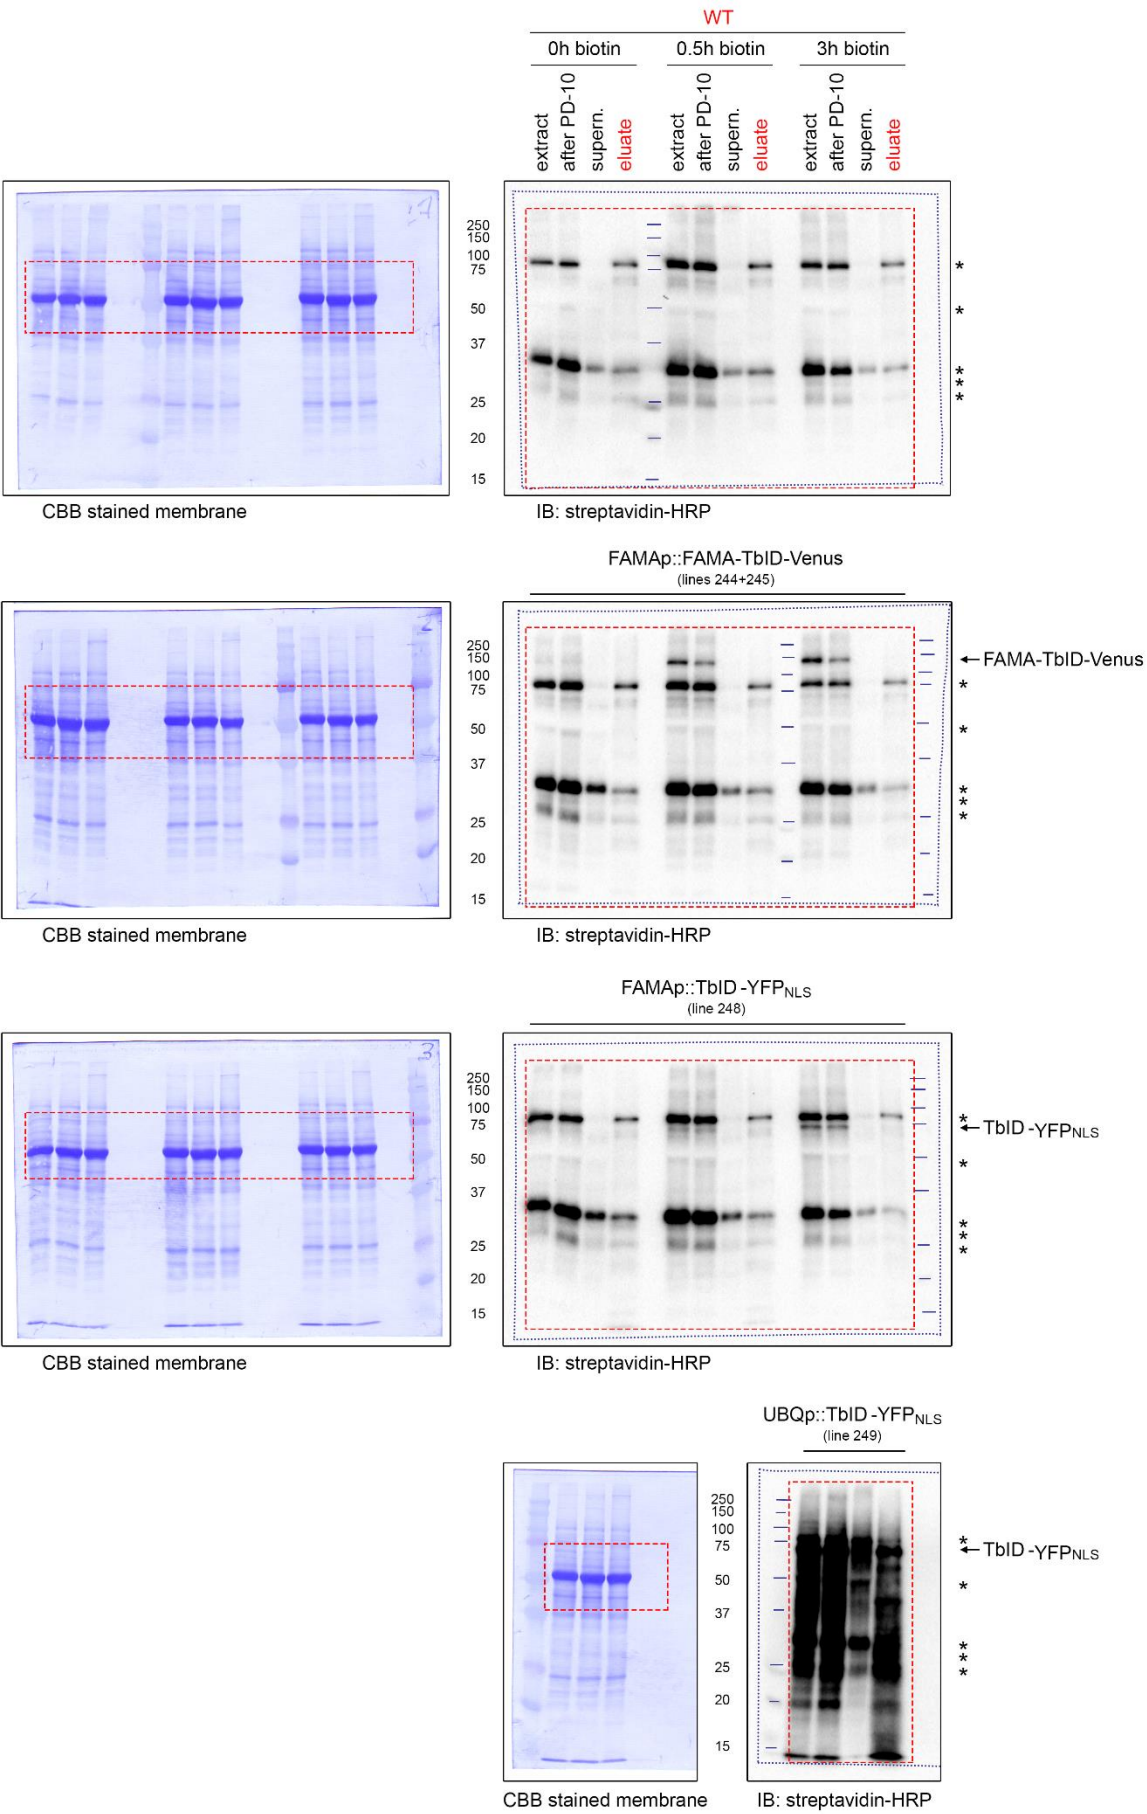

Figure 5 – figure supplement 5

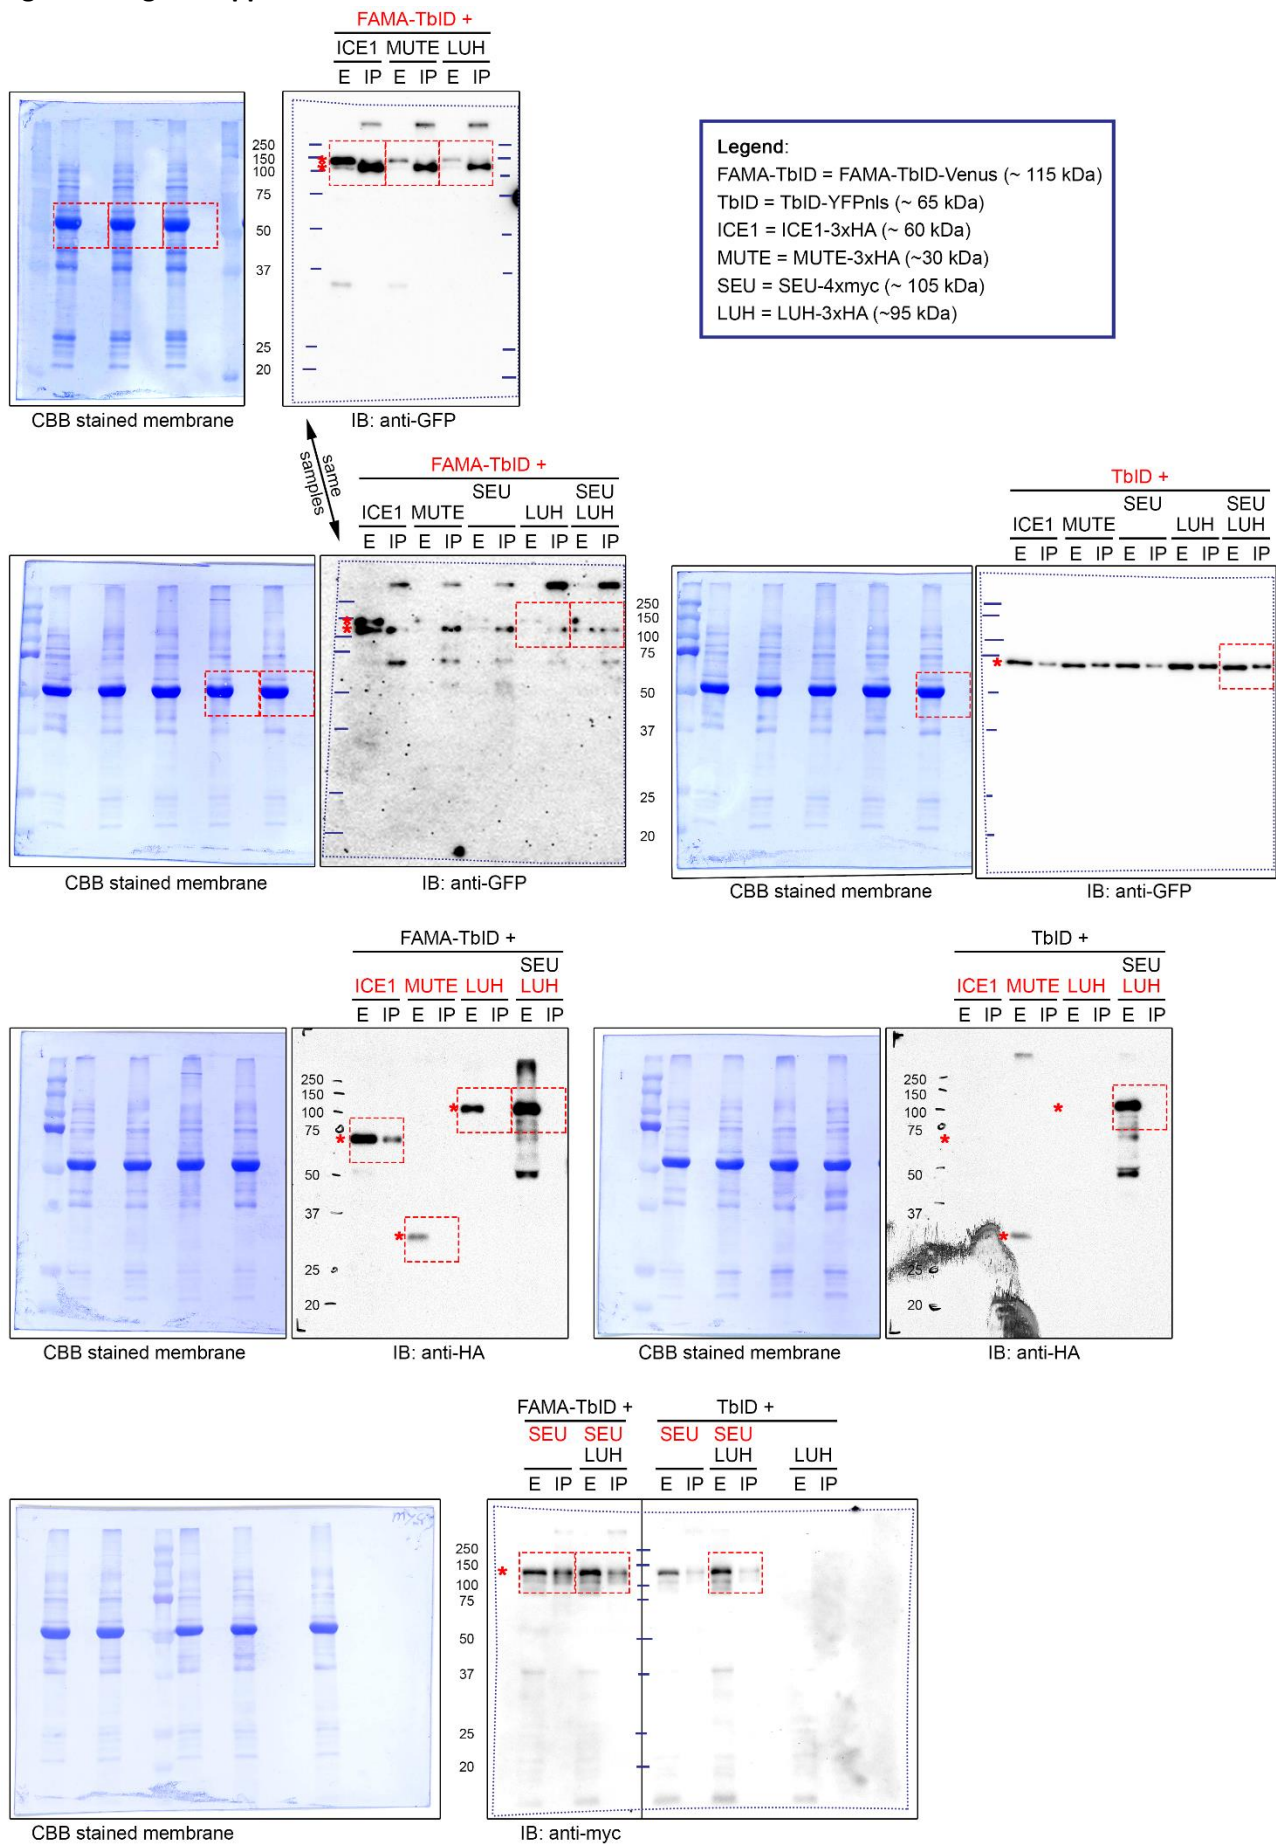

Figure supplement – uncropped immunoblots: page 19
