# Supplementary material for: Proximity labeling of protein complexes and cell-type-specific organellar proteomes in Arabidopsis enabled by TurboID
Source: eLife. 2019 Sep 19;8:e47864. doi: 10.7554/eLife.47864 (PMC6791687; doi:10.7554/eLife.47864)
Supplement: Supplementary file 2. — Table 1, ‘identified proteins’: Proteins identified in the ‘FAMA interactome’ experiment; Table 2, ‘FAMA-TbID enriched’: Proteins significantly enriched in FAMA-TbID vs. WT and FAMAnucTbID samples and in FAMAnucTbID vs. WT; Table 3, ‘enrichment over time’: Proteins significantly enriched in WT, FAMA-TbID, and FAMAnucTbID after biotin treatment compared to the no-biotin control; Table 4, ‘FAMA complex candidates’: FAMA interaction candidates from Figure 5 and Table 1; Table 5, ‘FAMA AP-MS’: Proteins significantly enriched in AP-MS experiments with FAMA-CFP [file elife-47864-supp2.xlsx]

## Sheet: summary
table	tab name	description
Table 1	identified proteins	Proteins identified in the 'FAMA interactome' experiment
Table 2	FAMA-TbID enriched	Proteins significantly enriched in FAMA-TbID vs. WT and FAMAnucTbID samples (FAMA interaction candidates; Figure 5) and in FAMAnucTbID vs. WT
Table 3	enrichement over time	Proteins significantly enriched in WT, FAMA-TbID, and FAMAnucTbID after biotin treatment compared to the no-biotin control
Table 4	FAMA complex candidates	FAMA interaction candidates from Figure 5 and Table 1
Table 5	FAMA AP-MS	Proteins significantly enriched in AP-MS experiments with FAMA-CFP

## Sheet: identified proteins
Table 1: Proteins identified in the 'FAMA interactome' experiment
2,511 proteins that were found in at least 3 replicates of one sample by MS/MS identification or by matching
# of repliates identified in									known endogenous biotinylation target	Major protein IDs	Protein IDs	FASTA header
WT (0h)	WT (0.5h)	WT (3h)	FAMA-TbID (0h)	FAMA-TbID (0.5h)	FAMA-TbID (3h)	FAMAnucTbID (0h)	FAMAnucTbID (0.5h)	FAMAnucTbID (3h)
3	3	3	3	3	3	3	3	3	ACC1	AT1G36160.2;AT1G36160.1	AT1G36160.2;AT1G36160.1	AT1G36160.2 | Symbols: ACC1 | acetyl-CoA carboxylase 1 | chr1:13534196-13543773 FORWARD LENGTH=2254;AT1G36160.1 | Symbols: ACC1, AT-ACC1, EMB22, GK, PAS3 | acetyl-CoA carboxylase 1 | chr1:13534196-13543773 FORWARD LENGTH=2254
3	3	3	3	3	3	3	3	3	ACC2	AT1G36180.1	AT1G36180.1;AT1G36180.2	AT1G36180.1 | Symbols: ACC2 | acetyl-CoA carboxylase 2 | chr1:13546047-13558339 FORWARD LENGTH=2355
3	3	3	3	3	3	3	3	3	ACCD	ATCG00500.1	ATCG00500.1	ATCG00500.1 | Symbols: ACCD | acetyl-CoA carboxylase carboxyl transferase subunit beta | chrC:57075-58541 FORWARD LENGTH=488
3	3	3	3	3	3	3	3	3	CAC1A	AT5G16390.1;AT5G16390.2	AT5G16390.1;AT5G16390.2	AT5G16390.1 | Symbols: CAC1, CAC1A, BCCP, BCCP1 | chloroplastic acetylcoenzyme A carboxylase 1 | chr5:5361098-5363020 REVERSE LENGTH=280;AT5G16390.2 | Symbols: CAC1, CAC1A, BCCP, BCCP1, CAC1-A, BCCP-1 | chloroplastic acetylcoenzyme A carboxylase 1 | chr5:5
3	3	3	3	3	3	3	3	3	CAC1B	AT5G15530.1	AT5G15530.1	AT5G15530.1 | Symbols: BCCP2, CAC1-B | biotin carboxyl carrier protein 2 | chr5:5038955-5040437 FORWARD LENGTH=255
3	3	3	3	3	3	3	3	3	CAC2	AT5G35360.1;AT5G35360.3;AT5G35360.2	AT5G35360.1;AT5G35360.3;AT5G35360.2	AT5G35360.1 | Symbols: CAC2 | acetyl Co-enzyme a carboxylase biotin carboxylase subunit | chr5:13584300-13588268 FORWARD LENGTH=537;AT5G35360.3 | Symbols: CAC2 | acetyl Co-enzyme a carboxylase biotin carboxylase subunit | chr5:13584300-13588163 FORWARD LEN
3	3	3	3	3	3	3	3	3	MCCA	AT1G03090.2;AT1G03090.1	AT1G03090.2;AT1G03090.1	AT1G03090.2 | Symbols: MCCA | methylcrotonyl-CoA carboxylase alpha chain, mitochondrial / 3-methylcrotonyl-CoA carboxylase 1 (MCCA) | chr1:739715-743819 FORWARD LENGTH=734;AT1G03090.1 | Symbols: MCCA | methylcrotonyl-CoA carboxylase alpha chain, mitochondr
3	3	3	3	3	3	3	3	3	MCCB	AT4G34030.1	AT4G34030.1	AT4G34030.1 | Symbols: MCCB | 3-methylcrotonyl-CoA carboxylase | chr4:16301298-16303949 FORWARD LENGTH=587
3	3	3	3	3	3	3	3	3		ATMG01270.1;AT2G07696.1	ATMG01270.1;AT2G07696.1	ATMG01270.1 | Symbols: RPS7 | mitochondrial ribosomal protein S7 | chrM:314627-315073 FORWARD LENGTH=148;AT2G07696.1 | Symbols: | Ribosomal protein S7p/S5e family protein | chr2:3351340-3351786 REVERSE LENGTH=148
3	3	3	3	3	3	3	3	3		ATMG00640.1	ATMG00640.1;AT3G47180.1	ATMG00640.1 | Symbols: ORF25 | hydrogen ion transporting ATP synthases, rotational mechanism;zinc ion binding | chrM:188084-188662 REVERSE LENGTH=192
3	3	3	3	3	3	3	3	3		ATMG00560.1;AT2G07715.1	ATMG00560.1;AT2G07715.1	ATMG00560.1 | Symbols: RPL2 | Nucleic acid-binding, OB-fold-like protein | chrM:154744-157345 FORWARD LENGTH=349;AT2G07715.1 | Symbols: | Nucleic acid-binding, OB-fold-like protein | chr2:3411180-3412694 FORWARD LENGTH=389
3	3	3	3	3	3	3	3	3		ATMG00510.1	ATMG00510.1	ATMG00510.1 | Symbols: NAD7 | NADH dehydrogenase subunit 7 | chrM:132071-138153 FORWARD LENGTH=394
3	3	3	3	3	3	3	3	3		ATMG00480.1;AT2G07707.1	ATMG00480.1;AT2G07707.1	ATMG00480.1 | Symbols: ORFB, ATP8 | Plant mitochondrial ATPase, F0 complex, subunit 8 protein | chrM:129909-130385 FORWARD LENGTH=158;AT2G07707.1 | Symbols: | Plant mitochondrial ATPase, F0 complex, subunit 8 protein | chr2:3386292-3386768 FORWARD LENGTH=
3	3	3	3	3	3	3	3	3		ATMG00290.1;AT2G07734.1	ATMG00290.1;AT2G07734.1	ATMG00290.1 | Symbols: RPS4 | mitochondrial ribosomal protein S4 | chrM:82028-83116 REVERSE LENGTH=362;AT2G07734.1 | Symbols: | Alpha-L RNA-binding motif/Ribosomal protein S4 family protein | chr2:3472604-3473692 REVERSE LENGTH=362
3	3	3	3	3	3	3	3	3		ATMG00160.1	ATMG00160.1	ATMG00160.1 | Symbols: COX2 | cytochrome oxidase 2 | chrM:40502-42628 REVERSE LENGTH=260
3	3	3	3	3	3	3	3	3		ATMG00070.1	ATMG00070.1	ATMG00070.1 | Symbols: NAD9 | NADH dehydrogenase subunit 9 | chrM:23663-24235 REVERSE LENGTH=190
3	3	3	3	3	3	3	3	3		ATCG01310.1;ATCG00830.1	ATCG01310.1;ATCG00830.1	ATCG01310.1 | Symbols: RPL2.2 | ribosomal protein L2 | chrC:152806-154312 FORWARD LENGTH=274;ATCG00830.1 | Symbols: RPL2.1 | ribosomal protein L2 | chrC:84337-85843 REVERSE LENGTH=274
3	3	3	3	3	3	3	3	3		ATCG01300.1;ATCG00840.1	ATCG01300.1;ATCG00840.1	ATCG01300.1 | Symbols: RPL23.2 | ribosomal protein L23 | chrC:152506-152787 FORWARD LENGTH=93;ATCG00840.1 | Symbols: RPL23.1, RPL23 | ribosomal protein L23.1 | chrC:85862-86143 REVERSE LENGTH=93
3	3	3	3	3	3	3	3	3		ATCG01280.1;ATCG00860.1	ATCG01280.1;ATCG00860.1	ATCG01280.1 | Symbols: YCF2.2 | Chloroplast Ycf2;ATPase, AAA type, core | chrC:145291-152175 REVERSE LENGTH=2294;ATCG00860.1 | Symbols: YCF2.1 | Chloroplast Ycf2;ATPase, AAA type, core | chrC:86474-93358 FORWARD LENGTH=2294
3	3	3	3	3	3	3	3	3		ATCG01240.1;ATCG00900.1	ATCG01240.1;ATCG00900.1	ATCG01240.1 | Symbols: RPS7.2 | ribosomal protein S7 | chrC:140704-141171 FORWARD LENGTH=155;ATCG00900.1 | Symbols: RPS7.1, RPS7 | Ribosomal protein S7p/S5e family protein | chrC:97478-97945 REVERSE LENGTH=155
3	3	3	3	3	3	3	3	3		ATCG01230.1;ATCG00905.1;ATCG00065.1	ATCG01230.1;ATCG00905.1;ATCG00065.1	ATCG01230.1 | Symbols: RPS12B, RPS12 | ribosomal protein S12B | chrC:139856-140650 FORWARD LENGTH=123;ATCG00905.1 | Symbols: RPS12C, RPS12 | ribosomal protein S12C | chrC:97999-98793 REVERSE LENGTH=123;ATCG00065.1 | Symbols: RPS12A, RPS12 | ribosomal prote
3	3	3	3	3	3	3	3	3		ATCG01130.1	ATCG01130.1;ATCG01000.1;ATMG00370.1;AT2G07739.1	ATCG01130.1 | Symbols: YCF1.2 | Ycf1 protein | chrC:123884-129244 REVERSE LENGTH=1786
3	3	3	3	3	3	3	3	3		ATCG01120.1	ATCG01120.1	ATCG01120.1 | Symbols: RPS15 | chloroplast ribosomal protein S15 | chrC:123296-123562 REVERSE LENGTH=88
3	3	3	3	3	3	3	3	3		ATCG01110.1	ATCG01110.1	ATCG01110.1 | Symbols: NDHH | NAD(P)H dehydrogenase subunit H | chrC:122011-123192 REVERSE LENGTH=393
2	2	3	3	3	3	3	3	3		ATCG01090.1	ATCG01090.1	ATCG01090.1 | Symbols: NDHI | NADPH dehydrogenases | chrC:119244-119762 REVERSE LENGTH=172
3	3	3	3	3	3	3	3	3		ATCG01060.1	ATCG01060.1	ATCG01060.1 | Symbols: PSAC | iron-sulfur cluster binding;electron carriers;4 iron, 4 sulfur cluster binding | chrC:117318-117563 REVERSE LENGTH=81
3	3	3	3	3	3	3	3	3		ATCG01020.1	ATCG01020.1	ATCG01020.1 | Symbols: RPL32 | ribosomal protein L32 | chrC:113449-113607 FORWARD LENGTH=52
3	3	3	3	3	3	3	3	3		ATCG00820.1	ATCG00820.1	ATCG00820.1 | Symbols: RPS19 | ribosomal protein S19 | chrC:84005-84283 REVERSE LENGTH=92
3	3	3	3	3	3	3	3	3		ATCG00810.1	ATCG00810.1	ATCG00810.1 | Symbols: RPL22 | ribosomal protein L22 | chrC:83467-83949 REVERSE LENGTH=160
3	3	3	3	3	3	3	3	3		ATCG00800.1	ATCG00800.1	ATCG00800.1 | Symbols: | structural constituent of ribosome | chrC:82826-83482 REVERSE LENGTH=218
3	3	3	3	3	3	3	3	3		ATCG00790.1	ATCG00790.1;AT2G28830.1	ATCG00790.1 | Symbols: RPL16 | ribosomal protein L16 | chrC:81189-82652 REVERSE LENGTH=135
3	3	3	3	3	3	3	3	3		ATCG00780.1	ATCG00780.1	ATCG00780.1 | Symbols: RPL14 | ribosomal protein L14 | chrC:80696-81064 REVERSE LENGTH=122
3	3	3	3	3	3	3	3	3		ATCG00770.1	ATCG00770.1	ATCG00770.1 | Symbols: RPS8 | ribosomal protein S8 | chrC:80068-80472 REVERSE LENGTH=134
3	3	3	3	3	3	3	3	3		ATCG00750.1	ATCG00750.1	ATCG00750.1 | Symbols: RPS11 | ribosomal protein S11 | chrC:78960-79376 REVERSE LENGTH=138
3	3	3	3	3	3	3	3	3		ATCG00740.1	ATCG00740.1	ATCG00740.1 | Symbols: RPOA | RNA polymerase subunit alpha | chrC:77901-78890 REVERSE LENGTH=329
3	3	3	3	3	3	3	3	3		ATCG00730.1	ATCG00730.1	ATCG00730.1 | Symbols: PETD | photosynthetic electron transfer D | chrC:76481-77672 FORWARD LENGTH=160
3	3	3	3	3	3	3	3	3		ATCG00680.1	ATCG00680.1	ATCG00680.1 | Symbols: PSBB | photosystem II reaction center protein B | chrC:72371-73897 FORWARD LENGTH=508
3	3	3	3	3	3	3	3	3		ATCG00670.1	ATCG00670.1	ATCG00670.1 | Symbols: CLPP1, PCLPP | plastid-encoded CLP P | chrC:69910-71882 REVERSE LENGTH=196
3	3	3	3	3	3	3	3	3		ATCG00660.1	ATCG00660.1	ATCG00660.1 | Symbols: RPL20 | ribosomal protein L20 | chrC:68512-68865 REVERSE LENGTH=117
3	3	3	3	3	3	3	3	3		ATCG00650.1	ATCG00650.1	ATCG00650.1 | Symbols: RPS18 | ribosomal protein S18 | chrC:67917-68222 FORWARD LENGTH=101
3	3	3	3	3	3	3	3	3		ATCG00640.1	ATCG00640.1	ATCG00640.1 | Symbols: RPL33 | ribosomal protein L33 | chrC:67488-67688 FORWARD LENGTH=66
3	3	3	3	3	3	3	3	3		ATCG00540.1	ATCG00540.1	ATCG00540.1 | Symbols: PETA | photosynthetic electron transfer A | chrC:61657-62619 FORWARD LENGTH=320
3	3	3	3	3	3	3	3	3		ATCG00520.1	ATCG00520.1	ATCG00520.1 | Symbols: YCF4 | unfolded protein binding | chrC:59772-60326 FORWARD LENGTH=184
3	3	3	3	3	3	3	3	3		ATCG00490.1	ATCG00490.1;ATMG00280.1;AT2G07732.1	ATCG00490.1 | Symbols: RBCL | ribulose-bisphosphate carboxylases | chrC:54958-56397 FORWARD LENGTH=479
3	3	3	3	3	3	3	3	3		ATCG00480.1	ATCG00480.1	ATCG00480.1 | Symbols: ATPB, PB | ATP synthase subunit beta | chrC:52660-54156 REVERSE LENGTH=498
3	3	3	3	3	3	3	3	3		ATCG00470.1	ATCG00470.1	ATCG00470.1 | Symbols: ATPE | ATP synthase epsilon chain | chrC:52265-52663 REVERSE LENGTH=132
2	2	3	3	3	3	3	3	3		ATCG00420.1	ATCG00420.1	ATCG00420.1 | Symbols: NDHJ | NADH dehydrogenase subunit J | chrC:48677-49153 REVERSE LENGTH=158
3	3	3	3	3	3	3	3	3		ATCG00380.1	ATCG00380.1	ATCG00380.1 | Symbols: RPS4 | chloroplast ribosomal protein S4 | chrC:45223-45828 REVERSE LENGTH=201
3	3	3	3	3	3	3	3	3		ATCG00350.1	ATCG00350.1	ATCG00350.1 | Symbols: PSAA | Photosystem I, PsaA/PsaB protein | chrC:39605-41857 REVERSE LENGTH=750
3	3	3	3	3	3	3	3	3		ATCG00340.1	ATCG00340.1	ATCG00340.1 | Symbols: PSAB | Photosystem I, PsaA/PsaB protein | chrC:37375-39579 REVERSE LENGTH=734
3	3	3	3	3	3	3	3	3		ATCG00330.1	ATCG00330.1	ATCG00330.1 | Symbols: RPS14 | chloroplast ribosomal protein S14 | chrC:36938-37240 REVERSE LENGTH=100
3	3	3	3	3	3	3	3	3		ATCG00280.1	ATCG00280.1	ATCG00280.1 | Symbols: PSBC | photosystem II reaction center protein C | chrC:33720-35141 FORWARD LENGTH=473
3	3	3	3	3	3	3	3	3		ATCG00270.1	ATCG00270.1	ATCG00270.1 | Symbols: PSBD | photosystem II reaction center protein D | chrC:32711-33772 FORWARD LENGTH=353
3	3	3	3	3	3	3	3	3		ATCG00190.1	ATCG00190.1	ATCG00190.1 | Symbols: RPOB | RNA polymerase subunit beta | chrC:23111-26329 REVERSE LENGTH=1072
3	3	3	3	3	3	3	3	3		ATCG00180.1	ATCG00180.1	ATCG00180.1 | Symbols: RPOC1 | DNA-directed RNA polymerase family protein | chrC:20251-23084 REVERSE LENGTH=680
3	3	3	3	3	3	3	3	3		ATCG00170.1	ATCG00170.1	ATCG00170.1 | Symbols: RPOC2 | DNA-directed RNA polymerase family protein | chrC:15938-20068 REVERSE LENGTH=1376
3	3	3	3	3	3	3	3	3		ATCG00160.1	ATCG00160.1	ATCG00160.1 | Symbols: RPS2 | ribosomal protein S2 | chrC:15013-15723 REVERSE LENGTH=236
3	3	3	3	3	3	3	3	3		ATCG00130.1	ATCG00130.1	ATCG00130.1 | Symbols: ATPF | ATPase, F0 complex, subunit B/B, bacterial/chloroplast | chrC:11529-12798 REVERSE LENGTH=184
3	3	3	3	3	3	3	3	3		ATCG00120.1	ATCG00120.1	ATCG00120.1 | Symbols: ATPA | ATP synthase subunit alpha | chrC:9938-11461 REVERSE LENGTH=507
3	3	3	3	3	3	3	3	3		ATCG00020.1	ATCG00020.1	ATCG00020.1 | Symbols: PSBA | photosystem II reaction center protein A | chrC:383-1444 REVERSE LENGTH=353
3	3	3	3	3	3	3	3	3		AT5G67560.1	AT5G67560.1	AT5G67560.1 | Symbols: ATARLA1D, ARLA1D | ADP-ribosylation factor-like A1D | chr5:26950579-26951913 FORWARD LENGTH=184
3	3	3	3	3	3	3	3	3		AT5G67530.1	AT5G67530.1	AT5G67530.1 | Symbols: ATPUB49, PUB49 | plant U-box 49 | chr5:26941260-26943878 FORWARD LENGTH=595
3	3	3	3	3	3	3	3	3		AT5G67510.1	AT5G67510.1	AT5G67510.1 | Symbols: | Translation protein SH3-like family protein | chr5:26937970-26938410 REVERSE LENGTH=146
3	3	3	3	3	3	3	3	3		AT5G67500.1;AT5G67500.2	AT5G67500.1;AT5G67500.2	AT5G67500.1 | Symbols: VDAC2, ATVDAC2 | voltage dependent anion channel 2 | chr5:26935223-26937123 FORWARD LENGTH=276;AT5G67500.2 | Symbols: VDAC2 | voltage dependent anion channel 2 | chr5:26935223-26937123 FORWARD LENGTH=303
2	3	3	2	3	3	2	2	3		AT5G67400.1	AT5G67400.1	AT5G67400.1 | Symbols: RHS19 | root hair specific 19 | chr5:26894896-26896300 FORWARD LENGTH=329
3	3	3	3	3	3	3	3	3		AT5G67385.1	AT5G67385.1;AT1G03010.1	AT5G67385.1 | Symbols: | Phototropic-responsive NPH3 family protein | chr5:26884754-26887083 FORWARD LENGTH=604
3	3	3	3	3	3	3	3	3		AT5G67380.1;AT5G67380.2	AT5G67380.1;AT5G67380.2	AT5G67380.1 | Symbols: CKA1, ATCKA1 | casein kinase alpha 1 | chr5:26881156-26883383 REVERSE LENGTH=409;AT5G67380.2 | Symbols: CKA1, ATCKA1 | casein kinase alpha 1 | chr5:26881156-26883383 REVERSE LENGTH=376
2	3	3	2	3	3	3	3	3		AT5G67360.1	AT5G67360.1	AT5G67360.1 | Symbols: ARA12 | Subtilase family protein | chr5:26872192-26874465 REVERSE LENGTH=757
3	3	3	3	3	3	3	3	3		AT5G67240.1;AT5G67240.2	AT5G67240.1;AT5G67240.2	AT5G67240.1 | Symbols: SDN3 | small RNA degrading nuclease 3 | chr5:26824454-26828098 REVERSE LENGTH=782;AT5G67240.2 | Symbols: SDN3 | small RNA degrading nuclease 3 | chr5:26824454-26828098 REVERSE LENGTH=762
3	3	3	3	3	3	3	3	3		AT5G67030.1;AT5G67030.2	AT5G67030.1;AT5G67030.2	AT5G67030.1 | Symbols: ABA1, LOS6, NPQ2, ATABA1, ZEP, IBS3, ATZEP | zeaxanthin epoxidase (ZEP) (ABA1) | chr5:26753745-26757090 REVERSE LENGTH=667;AT5G67030.2 | Symbols: ABA1, LOS6, NPQ2, ATABA1, ZEP, IBS3, ATZEP | zeaxanthin epoxidase (ZEP) (ABA1) | chr5:2
3	3	3	3	3	3	3	3	3		AT5G66760.1	AT5G66760.1;AT2G18450.1	AT5G66760.1 | Symbols: SDH1-1 | succinate dehydrogenase 1-1 | chr5:26653776-26657224 FORWARD LENGTH=634
3	3	3	3	3	3	3	3	3		AT5G66680.1	AT5G66680.1	AT5G66680.1 | Symbols: DGL1 | dolichyl-diphosphooligosaccharide-protein glycosyltransferase 48kDa subunit family protein | chr5:26617840-26620581 REVERSE LENGTH=437
3	3	3	3	3	3	3	3	3		AT5G66570.1	AT5G66570.1	AT5G66570.1 | Symbols: PSBO-1, OEE1, OEE33, OE33, PSBO1, MSP-1 | PS II oxygen-evolving complex 1 | chr5:26568744-26570124 FORWARD LENGTH=332
3	3	3	3	3	3	3	3	3		AT5G66470.1	AT5G66470.1	AT5G66470.1 | Symbols: | RNA binding;GTP binding | chr5:26541986-26544302 REVERSE LENGTH=427
3	3	3	3	3	3	3	3	3		AT5G66420.2;AT5G66420.1	AT5G66420.2;AT5G66420.1	AT5G66420.2 | Symbols: | LOCATED IN: cellular_component unknown;EXPRESSED IN: 23 plant structures;EXPRESSED DURING: 13 growth stages;CONTAINS InterPro DOMAIN/s: Uncharacterised conserved protein UCP033271 (InterPro:IPR008322), TIM-barrel signal transdu
3	3	3	3	3	3	3	3	3		AT5G66200.1	AT5G66200.1;AT4G34940.1	AT5G66200.1 | Symbols: ARO2 | armadillo repeat only 2 | chr5:26453648-26455603 REVERSE LENGTH=651
3	2	2	2	3	3	3	3	3		AT5G66190.2;AT5G66190.1	AT5G66190.2;AT5G66190.1	AT5G66190.2 | Symbols: ATLFNR1 | ferredoxin-NADP(+)-oxidoreductase 1 | chr5:26451203-26452616 REVERSE LENGTH=262;AT5G66190.1 | Symbols: ATLFNR1, FNR1 | ferredoxin-NADP(+)-oxidoreductase 1 | chr5:26451203-26453012 REVERSE LENGTH=360
2	3	3	2	3	3	2	2	3		AT5G66120.2;AT5G66120.1	AT5G66120.2;AT5G66120.1	AT5G66120.2 | Symbols: | 3-dehydroquinate synthase, putative | chr5:26431516-26433649 REVERSE LENGTH=442;AT5G66120.1 | Symbols: | 3-dehydroquinate synthase, putative | chr5:26431516-26433079 REVERSE LENGTH=338
3	3	3	3	3	3	3	3	3		AT5G65950.1	AT5G65950.1	AT5G65950.1 | Symbols: | FUNCTIONS IN: molecular_function unknown;INVOLVED IN: biological_process unknown;LOCATED IN: cellular_component unknown;EXPRESSED IN: 25 plant structures;EXPRESSED DURING: 15 growth stages;CONTAINS InterPro DOMAIN/s: Protein
3	3	3	3	3	3	3	3	3		AT5G65900.1	AT5G65900.1	AT5G65900.1 | Symbols: | DEA(D/H)-box RNA helicase family protein | chr5:26358328-26361244 FORWARD LENGTH=633
3	3	3	3	3	3	3	3	3		AT5G65770.3;AT5G65770.1;AT5G65770.2;AT5G65780.2	AT5G65770.3;AT5G65770.1;AT5G65770.2;AT5G65780.2	AT5G65770.3 | Symbols: LINC4 | little nuclei4 | chr5:26311587-26315610 FORWARD LENGTH=1010;AT5G65770.1 | Symbols: LINC4 | little nuclei4 | chr5:26311587-26315610 FORWARD LENGTH=1010;AT5G65770.2 | Symbols: LINC4 | little nuclei4 | chr5:26311587-26315544 FOR
3	3	3	3	3	3	3	3	3		AT5G65750.1	AT5G65750.1	AT5G65750.1 | Symbols: | 2-oxoglutarate dehydrogenase, E1 component | chr5:26304212-26307947 FORWARD LENGTH=1025
3	3	3	3	2	3	2	3	3		AT5G65730.1	AT5G65730.1	AT5G65730.1 | Symbols: XTH6 | xyloglucan endotransglucosylase/hydrolase 6 | chr5:26299080-26300290 FORWARD LENGTH=292
3	3	3	3	3	3	3	3	3		AT5G65720.1;AT5G65720.2	AT5G65720.1;AT5G65720.2	AT5G65720.1 | Symbols: ATNIFS1, NIFS1, NFS1, ATNFS1 | nitrogen fixation S (NIFS)-like 1 | chr5:26296349-26297710 FORWARD LENGTH=453;AT5G65720.2 | Symbols: ATNIFS1, NIFS1, NFS1, ATNFS1 | nitrogen fixation S (NIFS)-like 1 | chr5:26296733-26297710 FORWARD LEN
3	3	3	3	3	3	3	3	3		AT5G65620.1	AT5G65620.1	AT5G65620.1 | Symbols: | Zincin-like metalloproteases family protein | chr5:26221951-26225784 FORWARD LENGTH=791
0	0	0	3	3	3	3	3	3		AT5G65590.1	AT5G65590.1;AT3G45610.1;AT4G38000.1;AT1G21340.1;AT2G28510.1;AT1G28310.1;AT1G28310.2;AT5G62940.1	AT5G65590.1 | Symbols: | Dof-type zinc finger DNA-binding family protein | chr5:26212084-26213034 REVERSE LENGTH=316
2	3	3	3	3	3	2	2	3		AT5G65540.1	AT5G65540.1	AT5G65540.1 | Symbols: | unknown protein;Has 6825 Blast hits to 3811 proteins in 289 species: Archae - 0;Bacteria - 184;Metazoa - 2139;Fungi - 760;Plants - 816;Viruses - 52;Other Eukaryotes - 2874 (source: NCBI BLink). | chr5:26195710-26198112 FORW
3	3	3	3	3	3	3	3	3		AT5G65430.2;AT5G65430.1;AT5G65430.3	AT5G65430.2;AT5G65430.1;AT5G65430.3	AT5G65430.2 | Symbols: GRF8, GF14 KAPPA | general regulatory factor 8 | chr5:26148546-26150255 REVERSE LENGTH=246;AT5G65430.1 | Symbols: GRF8, 14-3-3KAPPA, GF14 KAPPA | general regulatory factor 8 | chr5:26148546-26150255 REVERSE LENGTH=248;AT5G65430.3 | S
2	3	3	3	3	3	3	3	3		AT5G65220.1	AT5G65220.1	AT5G65220.1 | Symbols: | Ribosomal L29 family protein | chr5:26061301-26062506 FORWARD LENGTH=173
3	3	3	3	3	3	3	3	3		AT5G65110.1;AT5G65110.2	AT5G65110.1;AT5G65110.2	AT5G65110.1 | Symbols: ACX2, ATACX2 | acyl-CoA oxidase 2 | chr5:26009821-26012482 REVERSE LENGTH=692;AT5G65110.2 | Symbols: ACX2, ATACX2 | acyl-CoA oxidase 2 | chr5:26010060-26012482 REVERSE LENGTH=646
3	3	3	3	3	3	3	3	3		AT5G65020.1;AT5G65020.2	AT5G65020.1;AT5G65020.2	AT5G65020.1 | Symbols: ANNAT2 | annexin 2 | chr5:25973915-25975554 FORWARD LENGTH=317;AT5G65020.2 | Symbols: ANNAT2 | annexin 2 | chr5:25974366-25975554 FORWARD LENGTH=302
3	3	3	3	3	3	3	3	3		AT5G65010.1;AT5G65010.2	AT5G65010.1;AT5G65010.2	AT5G65010.1 | Symbols: ASN2 | asparagine synthetase 2 | chr5:25969224-25972278 FORWARD LENGTH=578;AT5G65010.2 | Symbols: ASN2 | asparagine synthetase 2 | chr5:25969224-25972278 FORWARD LENGTH=579
3	3	3	3	3	3	3	3	3		AT5G64960.1;AT5G10270.1;AT5G64960.2	AT5G64960.1;AT5G10270.1;AT5G64960.2;AT5G01850.1;AT5G50180.1;AT1G66750.1;AT5G40540.1;AT3G27560.1;AT3G50720.1;AT1G18040.1;AT1G73690.1;AT5G66710.1;AT1G52290.1	AT5G64960.1 | Symbols: CDKC2, CDKC;2 | cyclin dependent kinase group C2 | chr5:25955497-25958427 FORWARD LENGTH=513;AT5G10270.1 | Symbols: CDKC;1 | cyclin-dependent kinase C;1 | chr5:3221715-3224674 REVERSE LENGTH=505;AT5G64960.2 | Symbols: CDKC2, CDKC;2 |
1	2	3	2	3	3	3	2	3		AT5G64860.1	AT5G64860.1	AT5G64860.1 | Symbols: DPE1 | disproportionating enzyme | chr5:25925373-25928788 REVERSE LENGTH=576
3	3	3	3	3	3	3	3	3		AT5G64840.1	AT5G64840.1;AT5G09930.1	AT5G64840.1 | Symbols: GCN5, ATGCN5 | general control non-repressible 5 | chr5:25916956-25919693 REVERSE LENGTH=692
3	3	3	3	3	3	3	2	3		AT5G64740.1;AT5G09870.1;AT4G39350.1	AT5G64740.1;AT5G09870.1;AT4G39350.1;AT2G21770.1	AT5G64740.1 | Symbols: CESA6, IXR2, E112, PRC1 | cellulose synthase 6 | chr5:25881555-25886333 FORWARD LENGTH=1084;AT5G09870.1 | Symbols: CESA5 | cellulose synthase 5 | chr5:3073356-3077974 FORWARD LENGTH=1069;AT4G39350.1 | Symbols: CESA2, ATH-A, ATCESA2 |
3	3	3	3	3	3	3	3	3		AT5G64670.1	AT5G64670.1	AT5G64670.1 | Symbols: | Ribosomal protein L18e/L15 superfamily protein | chr5:25852535-25853880 REVERSE LENGTH=281
3	3	3	3	3	3	3	3	3		AT5G64580.1	AT5G64580.1	AT5G64580.1 | Symbols: | AAA-type ATPase family protein | chr5:25817391-25821465 REVERSE LENGTH=855
2	3	3	3	3	3	3	3	3		AT5G64460.8;AT5G64460.6;AT5G64460.4;AT5G64460.3;AT5G64460.2;AT5G64460.1;AT5G64460.5;AT5G64460.7	AT5G64460.8;AT5G64460.6;AT5G64460.4;AT5G64460.3;AT5G64460.2;AT5G64460.1;AT5G64460.5;AT5G64460.7	AT5G64460.8 | Symbols: | Phosphoglycerate mutase family protein | chr5:25773009-25775104 REVERSE LENGTH=282;AT5G64460.6 | Symbols: | Phosphoglycerate mutase family protein | chr5:25773009-25775104 REVERSE LENGTH=282;AT5G64460.4 | Symbols: | Phosphoglyce
2	3	3	3	2	3	3	3	3		AT5G64380.1	AT5G64380.1	AT5G64380.1 | Symbols: | Inositol monophosphatase family protein | chr5:25741342-25743024 FORWARD LENGTH=404
3	3	3	3	3	3	3	3	3		AT5G64330.1;AT5G64330.2	AT5G64330.1;AT5G64330.2	AT5G64330.1 | Symbols: NPH3, RPT3, JK218 | Phototropic-responsive NPH3 family protein | chr5:25727568-25730225 FORWARD LENGTH=746;AT5G64330.2 | Symbols: NPH3, RPT3, JK218 | Phototropic-responsive NPH3 family protein | chr5:25727568-25729510 FORWARD LENGTH=
3	3	3	3	3	3	3	3	3		AT5G64290.1	AT5G64290.1	AT5G64290.1 | Symbols: DCT, DIT2.1 | dicarboxylate transport 2.1 | chr5:25714495-25716642 REVERSE LENGTH=563
1	1	2	2	3	3	2	1	3		AT5G64270.1	AT5G64270.1	AT5G64270.1 | Symbols: | splicing factor, putative | chr5:25706909-25710718 FORWARD LENGTH=1269
3	3	3	3	3	3	3	3	3		AT5G64260.1	AT5G64260.1	AT5G64260.1 | Symbols: EXL2 | EXORDIUM like 2 | chr5:25703980-25704897 FORWARD LENGTH=305
3	2	3	3	3	3	3	2	3		AT5G64250.1;AT5G64250.2	AT5G64250.1;AT5G64250.2	AT5G64250.1 | Symbols: | Aldolase-type TIM barrel family protein | chr5:25697623-25698752 REVERSE LENGTH=293;AT5G64250.2 | Symbols: | Aldolase-type TIM barrel family protein | chr5:25697623-25698945 REVERSE LENGTH=333
3	3	3	3	3	3	3	3	3		AT5G64140.1	AT5G64140.1	AT5G64140.1 | Symbols: RPS28 | ribosomal protein S28 | chr5:25667529-25667723 REVERSE LENGTH=64
0	0	0	1	2	3	1	3	3		AT5G64130.1;AT5G64130.3	AT5G64130.1;AT5G64130.3	AT5G64130.1 | Symbols: | cAMP-regulated phosphoprotein 19-related protein | chr5:25664547-25665339 REVERSE LENGTH=115;AT5G64130.3 | Symbols: | cAMP-regulated phosphoprotein 19-related protein | chr5:25664547-25665339 REVERSE LENGTH=140
3	3	3	3	3	3	3	3	3		AT5G64120.1	AT5G64120.1	AT5G64120.1 | Symbols: | Peroxidase superfamily protein | chr5:25659551-25660946 REVERSE LENGTH=328
3	3	3	3	3	3	3	3	3		AT5G64100.1	AT5G64100.1	AT5G64100.1 | Symbols: | Peroxidase superfamily protein | chr5:25650824-25652062 REVERSE LENGTH=331
3	3	3	3	3	3	3	3	3		AT5G64050.1	AT5G64050.1	AT5G64050.1 | Symbols: ATERS, OVA3, ERS | glutamate tRNA synthetase | chr5:25630196-25633099 REVERSE LENGTH=570
3	3	3	3	3	3	3	3	3		AT5G64040.1	AT5G64040.1;AT5G64040.2	AT5G64040.1 | Symbols: PSAN | photosystem I reaction center subunit PSI-N, chloroplast, putative / PSI-N, putative (PSAN) | chr5:25628724-25629409 REVERSE LENGTH=171
3	3	3	3	3	3	3	3	3		AT5G63810.1	AT5G63810.1	AT5G63810.1 | Symbols: BGAL10 | beta-galactosidase 10 | chr5:25537242-25541315 FORWARD LENGTH=741
0	1	1	1	1	3	2	1	3		AT5G63670.2;AT5G63670.1	AT5G63670.2;AT5G63670.1	AT5G63670.2 | Symbols: SPT42 | SPT4 homolog 2 | chr5:25488012-25489044 FORWARD LENGTH=94;AT5G63670.1 | Symbols: SPT42 | SPT4 homolog 2 | chr5:25488012-25489247 FORWARD LENGTH=116
3	3	3	3	3	3	3	3	3		AT5G63620.1;AT5G63620.2	AT5G63620.1;AT5G63620.2	AT5G63620.1 | Symbols: | GroES-like zinc-binding alcohol dehydrogenase family protein | chr5:25466380-25468296 REVERSE LENGTH=427;AT5G63620.2 | Symbols: | GroES-like zinc-binding alcohol dehydrogenase family protein | chr5:25466380-25468296 REVERSE LENGT
3	3	3	3	3	3	3	3	3		AT5G63420.1	AT5G63420.1	AT5G63420.1 | Symbols: emb2746 | RNA-metabolising metallo-beta-lactamase family protein | chr5:25400515-25405807 FORWARD LENGTH=911
2	3	3	3	3	3	3	3	3		AT5G63190.2;AT5G63190.1	AT5G63190.2;AT5G63190.1	AT5G63190.2 | Symbols: | MA3 domain-containing protein | chr5:25346145-25348563 FORWARD LENGTH=702;AT5G63190.1 | Symbols: | MA3 domain-containing protein | chr5:25346145-25348563 FORWARD LENGTH=702
3	3	3	3	3	3	3	3	3		AT5G63140.1	AT5G63140.1	AT5G63140.1 | Symbols: ATPAP29, PAP29 | purple acid phosphatase 29 | chr5:25328237-25329616 FORWARD LENGTH=389
3	3	3	3	3	3	3	3	3		AT5G63120.2;AT5G63120.1	AT5G63120.2;AT5G63120.1	AT5G63120.2 | Symbols: | P-loop containing nucleoside triphosphate hydrolases superfamily protein | chr5:25318967-25322071 REVERSE LENGTH=591;AT5G63120.1 | Symbols: | P-loop containing nucleoside triphosphate hydrolases superfamily protein | chr5:2531979
3	3	3	3	3	3	3	3	3		AT5G62790.1;AT5G62790.2	AT5G62790.1;AT5G62790.2	AT5G62790.1 | Symbols: DXR, PDE129 | 1-deoxy-D-xylulose 5-phosphate reductoisomerase | chr5:25214358-25217292 REVERSE LENGTH=477;AT5G62790.2 | Symbols: DXR | 1-deoxy-D-xylulose 5-phosphate reductoisomerase | chr5:25214358-25217289 REVERSE LENGTH=497
3	3	3	3	3	3	3	3	3		AT5G62700.1;AT5G62690.1	AT5G62700.1;AT5G62690.1	AT5G62700.1 | Symbols: TUB3 | tubulin beta chain 3 | chr5:25184501-25186426 FORWARD LENGTH=450;AT5G62690.1 | Symbols: TUB2 | tubulin beta chain 2 | chr5:25181560-25183501 FORWARD LENGTH=450
3	3	3	3	3	3	3	3	3		AT5G62670.1	AT5G62670.1;AT3G47950.1	AT5G62670.1 | Symbols: AHA11, HA11 | H(+)-ATPase 11 | chr5:25159495-25164957 FORWARD LENGTH=956
1	3	3	3	3	3	2	3	3		AT5G62600.1	AT5G62600.1	AT5G62600.1 | Symbols: | ARM repeat superfamily protein | chr5:25123337-25132473 REVERSE LENGTH=958
2	3	3	3	3	3	2	3	3		AT5G62530.1	AT5G62530.1	AT5G62530.1 | Symbols: ALDH12A1, ATP5CDH, P5CDH | aldehyde dehydrogenase 12A1 | chr5:25099768-25103159 REVERSE LENGTH=556
3	3	3	3	3	3	3	3	3		AT5G62390.1	AT5G62390.1	AT5G62390.1 | Symbols: ATBAG7, BAG7 | BCL-2-associated athanogene 7 | chr5:25052377-25054170 REVERSE LENGTH=446
3	3	3	3	3	3	3	2	3		AT5G62350.1	AT5G62350.1	AT5G62350.1 | Symbols: | Plant invertase/pectin methylesterase inhibitor superfamily protein | chr5:25037504-25038112 FORWARD LENGTH=202
3	3	3	3	3	3	3	3	3		AT5G62300.2;AT5G62300.1;AT3G45030.1	AT5G62300.2;AT5G62300.1;AT3G45030.1	AT5G62300.2 | Symbols: | Ribosomal protein S10p/S20e family protein | chr5:25021388-25022235 REVERSE LENGTH=124;AT5G62300.1 | Symbols: | Ribosomal protein S10p/S20e family protein | chr5:25021388-25022235 REVERSE LENGTH=124;AT3G45030.1 | Symbols: | Ribo
3	3	3	3	3	3	3	3	3		AT5G62270.2;AT5G62270.1	AT5G62270.2;AT5G62270.1	AT5G62270.2 | Symbols: | FUNCTIONS IN: molecular_function unknown;INVOLVED IN: biological_process unknown;LOCATED IN: cellular_component unknown;BEST Arabidopsis thaliana protein match is: mucin-related (TAIR:AT2G02880.1). | chr5:25012227-25014486 FORW
3	3	3	3	3	3	3	3	3		AT5G62200.1	AT5G62200.1	AT5G62200.1 | Symbols: | Embryo-specific protein 3, (ATS3) | chr5:24984463-24985674 REVERSE LENGTH=190
3	3	3	3	3	3	3	3	3		AT5G62190.1	AT5G62190.1	AT5G62190.1 | Symbols: PRH75 | DEAD box RNA helicase (PRH75) | chr5:24980542-24983879 REVERSE LENGTH=671
3	3	3	3	3	3	3	3	3		AT5G61970.1	AT5G61970.1	AT5G61970.1 | Symbols: | signal recognition particle-related / SRP-related | chr5:24888920-24893079 FORWARD LENGTH=605
2	2	3	3	2	3	2	2	3		AT5G61900.3;AT5G61900.1;AT5G07300.1;AT5G61910.4	AT5G61900.3;AT5G61900.1;AT5G07300.1;AT5G61910.4	AT5G61900.3 | Symbols: BON1, CPN1, BON | Calcium-dependent phospholipid-binding Copine family protein | chr5:24855908-24859150 REVERSE LENGTH=578;AT5G61900.1 | Symbols: BON1, CPN1, BON | Calcium-dependent phospholipid-binding Copine family protein | chr5:2
2	2	3	3	3	3	3	3	3		AT5G61790.1;AT5G07340.1;AT5G07340.2	AT5G61790.1;AT5G07340.1;AT5G07340.2	AT5G61790.1 | Symbols: CNX1, ATCNX1 | calnexin 1 | chr5:24827394-24829642 REVERSE LENGTH=530;AT5G07340.1 | Symbols: | Calreticulin family protein | chr5:2317300-2319458 FORWARD LENGTH=532;AT5G07340.2 | Symbols: | Calreticulin family protein | chr5:231730
3	3	3	3	3	3	3	3	3		AT5G61780.1	AT5G61780.1	AT5G61780.1 | Symbols: Tudor2, AtTudor2, TSN2 | TUDOR-SN protein 2 | chr5:24822012-24826641 FORWARD LENGTH=985
3	3	3	3	3	3	3	3	3		AT5G61170.1;AT5G15520.1	AT5G61170.1;AT5G15520.1	AT5G61170.1 | Symbols: | Ribosomal protein S19e family protein | chr5:24611158-24612202 FORWARD LENGTH=143;AT5G15520.1 | Symbols: | Ribosomal protein S19e family protein | chr5:5037242-5038136 REVERSE LENGTH=143
3	2	3	3	3	3	3	3	3		AT5G61150.2;AT5G61150.1	AT5G61150.2;AT5G61150.1	AT5G61150.2 | Symbols: VIP4 | leo1-like family protein | chr5:24603846-24607528 REVERSE LENGTH=623;AT5G61150.1 | Symbols: VIP4 | leo1-like family protein | chr5:24603846-24607528 REVERSE LENGTH=625
3	3	3	3	3	3	3	3	3		AT5G61140.2;AT5G61140.1	AT5G61140.2;AT5G61140.1	AT5G61140.2 | Symbols: | U5 small nuclear ribonucleoprotein helicase | chr5:24589999-24603311 FORWARD LENGTH=2157;AT5G61140.1 | Symbols: | U5 small nuclear ribonucleoprotein helicase | chr5:24589999-24603311 FORWARD LENGTH=2146
3	3	3	3	3	3	3	3	3		AT5G60980.1;AT5G60980.2	AT5G60980.1;AT5G60980.2	AT5G60980.1 | Symbols: | Nuclear transport factor 2 (NTF2) family protein with RNA binding (RRM-RBD-RNP motifs) domain | chr5:24543988-24546027 FORWARD LENGTH=459;AT5G60980.2 | Symbols: | Nuclear transport factor 2 (NTF2) family protein with RNA binding
3	3	3	3	3	3	3	3	3		AT5G60940.1;AT5G60940.2	AT5G60940.1;AT5G60940.2	AT5G60940.1 | Symbols: | Transducin/WD40 repeat-like superfamily protein | chr5:24523092-24525655 FORWARD LENGTH=429;AT5G60940.2 | Symbols: | Transducin/WD40 repeat-like superfamily protein | chr5:24523757-24525655 FORWARD LENGTH=337
3	3	3	3	3	3	3	3	3		AT5G60790.1	AT5G60790.1	AT5G60790.1 | Symbols: ATGCN1, GCN1 | ABC transporter family protein | chr5:24453760-24455767 REVERSE LENGTH=595
3	3	3	3	3	3	3	3	3		AT5G60600.1;AT5G60600.2;AT5G60600.3	AT5G60600.1;AT5G60600.2;AT5G60600.3	AT5G60600.1 | Symbols: GCPE, ISPG, CSB3, CLB4, HDS | 4-hydroxy-3-methylbut-2-enyl diphosphate synthase | chr5:24359447-24363274 FORWARD LENGTH=741;AT5G60600.2 | Symbols: GCPE, ISPG, CSB3, CLB4, HDS | 4-hydroxy-3-methylbut-2-enyl diphosphate synthase | chr5
3	3	3	3	3	3	3	3	3		AT5G60540.1	AT5G60540.1	AT5G60540.1 | Symbols: EMB2407, ATPDX2, PDX2 | pyridoxine biosynthesis 2 | chr5:24336874-24338647 REVERSE LENGTH=255
3	3	3	3	3	3	3	3	3		AT5G60390.3;AT5G60390.1;AT1G07940.2;AT1G07940.1;AT1G07930.1;AT1G07920.1;AT5G60390.2;AT1G07930.2	AT5G60390.3;AT5G60390.1;AT1G07940.2;AT1G07940.1;AT1G07930.1;AT1G07920.1;AT5G60390.2;AT1G07930.2;AT1G35550.1	AT5G60390.3 | Symbols: | GTP binding Elongation factor Tu family protein | chr5:24289226-24290675 FORWARD LENGTH=449;AT5G60390.1 | Symbols: | GTP binding Elongation factor Tu family protein | chr5:24289226-24290675 FORWARD LENGTH=449;AT1G07940.2 | Symbol
3	3	3	3	3	3	3	3	3		AT5G60160.1	AT5G60160.1	AT5G60160.1 | Symbols: | Zn-dependent exopeptidases superfamily protein | chr5:24223887-24226783 REVERSE LENGTH=477
3	3	3	3	3	3	3	3	3		AT5G59970.1;AT5G59690.1;AT3G53730.1;AT3G46320.1;AT3G45930.1;AT2G28740.1;AT1G07820.2;AT1G07820.1;AT1G07660.1;AT1G07660.2	AT5G59970.1;AT5G59690.1;AT3G53730.1;AT3G46320.1;AT3G45930.1;AT2G28740.1;AT1G07820.2;AT1G07820.1;AT1G07660.1;AT1G07660.2	AT5G59970.1 | Symbols: | Histone superfamily protein | chr5:24146352-24146663 REVERSE LENGTH=103;AT5G59690.1 | Symbols: | Histone superfamily protein | chr5:24051649-24051960 FORWARD LENGTH=103;AT3G53730.1 | Symbols: | Histone superfamily protein | chr3
3	3	3	3	3	3	3	3	3		AT5G59950.4;AT5G59950.1;AT5G59950.5;AT5G59950.3;AT5G59950.2	AT5G59950.4;AT5G59950.1;AT5G59950.5;AT5G59950.3;AT5G59950.2	AT5G59950.4 | Symbols: | RNA-binding (RRM/RBD/RNP motifs) family protein | chr5:24140235-24141410 FORWARD LENGTH=211;AT5G59950.1 | Symbols: | RNA-binding (RRM/RBD/RNP motifs) family protein | chr5:24140235-24141504 FORWARD LENGTH=244;AT5G59950.5 | Symbol
3	3	3	3	3	3	3	3	3		AT5G59890.1;AT5G59890.2;AT3G46010.1	AT5G59890.1;AT5G59890.2;AT3G46010.1;AT3G46010.2	AT5G59890.1 | Symbols: ADF4, ATADF4 | actin depolymerizing factor 4 | chr5:24122545-24123596 FORWARD LENGTH=139;AT5G59890.2 | Symbols: ADF4, ATADF4 | actin depolymerizing factor 4 | chr5:24123107-24123596 FORWARD LENGTH=132;AT3G46010.1 | Symbols: ADF1, ata
3	3	3	3	3	3	3	3	3		AT5G59880.2;AT5G59880.1	AT5G59880.2;AT5G59880.1	AT5G59880.2 | Symbols: ADF3 | actin depolymerizing factor 3 | chr5:24120382-24121628 FORWARD LENGTH=124;AT5G59880.1 | Symbols: ADF3 | actin depolymerizing factor 3 | chr5:24120382-24121628 FORWARD LENGTH=139
3	3	3	3	3	3	3	3	3		AT5G59870.1	AT5G59870.1;AT1G52740.1	AT5G59870.1 | Symbols: HTA6 | histone H2A 6 | chr5:24115605-24116144 REVERSE LENGTH=150
3	3	3	3	3	3	3	3	3		AT5G59850.1;AT1G07770.2;AT1G07770.1	AT5G59850.1;AT1G07770.2;AT1G07770.1;AT2G39590.1	AT5G59850.1 | Symbols: | Ribosomal protein S8 family protein | chr5:24112499-24113084 REVERSE LENGTH=130;AT1G07770.2 | Symbols: RPS15A | ribosomal protein S15A | chr1:2408413-2409065 REVERSE LENGTH=130;AT1G07770.1 | Symbols: RPS15A | ribosomal protein S15
3	3	3	3	3	3	3	3	3		AT5G59840.1	AT5G59840.1	AT5G59840.1 | Symbols: | Ras-related small GTP-binding family protein | chr5:24107450-24109049 REVERSE LENGTH=216
3	3	3	3	3	3	3	3	3		AT5G59290.1;AT5G59290.2	AT5G59290.1;AT5G59290.2	AT5G59290.1 | Symbols: UXS3, ATUXS3 | UDP-glucuronic acid decarboxylase 3 | chr5:23915814-23917953 REVERSE LENGTH=342;AT5G59290.2 | Symbols: UXS3, ATUXS3 | UDP-glucuronic acid decarboxylase 3 | chr5:23915814-23917998 REVERSE LENGTH=357
3	3	3	3	3	3	3	3	3		AT5G58710.1	AT5G58710.1;AT3G55920.1	AT5G58710.1 | Symbols: ROC7 | rotamase CYP 7 | chr5:23717840-23719495 FORWARD LENGTH=204
3	3	3	3	3	3	3	3	3		AT5G58490.1	AT5G58490.1	AT5G58490.1 | Symbols: | NAD(P)-binding Rossmann-fold superfamily protein | chr5:23643068-23644455 FORWARD LENGTH=324
3	3	3	3	3	3	3	3	3		AT5G58470.2;AT5G58470.1	AT5G58470.2;AT5G58470.1	AT5G58470.2 | Symbols: TAF15b | TBP-associated factor 15B | chr5:23638566-23640854 REVERSE LENGTH=422;AT5G58470.1 | Symbols: TAF15b | TBP-associated factor 15B | chr5:23638566-23640854 REVERSE LENGTH=422
3	3	3	3	3	3	3	3	3		AT5G58410.1	AT5G58410.1	AT5G58410.1 | Symbols: | HEAT/U-box domain-containing protein | chr5:23609663-23617343 FORWARD LENGTH=1873
3	3	3	3	3	3	3	3	3		AT5G58330.3;AT5G58330.2;AT5G58330.1	AT5G58330.3;AT5G58330.2;AT5G58330.1	AT5G58330.3 | Symbols: | lactate/malate dehydrogenase family protein | chr5:23580010-23581751 REVERSE LENGTH=334;AT5G58330.2 | Symbols: | lactate/malate dehydrogenase family protein | chr5:23580010-23582287 REVERSE LENGTH=442;AT5G58330.1 | Symbols: | la
3	3	3	3	3	3	3	3	3		AT5G58290.1	AT5G58290.1	AT5G58290.1 | Symbols: RPT3 | regulatory particle triple-A ATPase 3 | chr5:23569155-23571116 FORWARD LENGTH=408
2	3	3	3	3	3	3	3	3		AT5G58270.1	AT5G58270.1	AT5G58270.1 | Symbols: STA1, ATATM3, ATM3 | ABC transporter of the mitochondrion 3 | chr5:23562168-23567040 FORWARD LENGTH=728
3	3	3	3	3	3	3	3	3		AT5G58140.3;AT5G58140.2;AT5G58140.1;AT5G58140.4	AT5G58140.3;AT5G58140.2;AT5G58140.1;AT5G58140.4	AT5G58140.3 | Symbols: PHOT2, NPL1 | phototropin 2 | chr5:23524771-23529947 FORWARD LENGTH=898;AT5G58140.2 | Symbols: PHOT2, NPL1 | phototropin 2 | chr5:23524771-23529993 FORWARD LENGTH=915;AT5G58140.1 | Symbols: PHOT2, NPL1 | phototropin 2 | chr5:23524771
3	3	3	3	3	3	3	2	2		AT5G58070.1	AT5G58070.1	AT5G58070.1 | Symbols: ATTIL, TIL | temperature-induced lipocalin | chr5:23500512-23501156 REVERSE LENGTH=186
2	3	3	2	2	3	1	2	2		AT5G58060.1;AT5G58060.2	AT5G58060.1;AT5G58060.2	AT5G58060.1 | Symbols: YKT61, ATYKT61, ATGP1 | SNARE-like superfamily protein | chr5:23498277-23500128 FORWARD LENGTH=199;AT5G58060.2 | Symbols: YKT61, ATYKT61, ATGP1 | SNARE-like superfamily protein | chr5:23498277-23500128 FORWARD LENGTH=221
3	3	3	3	3	3	3	3	3		AT5G58040.1	AT5G58040.1	AT5G58040.1 | Symbols: ATFIP1[V], FIPS5, ATFIPS5, FIP1[V] | homolog of yeast FIP1 [V] | chr5:23488865-23494000 FORWARD LENGTH=1196
2	2	3	3	3	3	3	3	3		AT5G57990.1	AT5G57990.1	AT5G57990.1 | Symbols: UBP23 | ubiquitin-specific protease 23 | chr5:23470218-23473997 REVERSE LENGTH=859
2	3	2	3	3	3	3	3	3		AT5G57655.2	AT5G57655.2;AT5G57655.1	AT5G57655.2 | Symbols: | xylose isomerase family protein | chr5:23347030-23349805 FORWARD LENGTH=477
3	3	3	3	3	3	2	3	3		AT5G57490.1	AT5G57490.1	AT5G57490.1 | Symbols: VDAC4, ATVDAC4 | voltage dependent anion channel 4 | chr5:23283895-23285335 REVERSE LENGTH=274
3	3	3	3	3	3	3	3	3		AT5G57370.1	AT5G57370.1	AT5G57370.1 | Symbols: | unknown protein;CONTAINS InterPro DOMAIN/s: Protein of unknown function DUF1777 (InterPro:IPR013957);Has 30201 Blast hits to 17322 proteins in 780 species: Archae - 12;Bacteria - 1396;Metazoa - 17338;Fungi - 3422;Plants - 50
3	3	3	3	3	3	3	3	3		AT5G57350.2;AT5G57350.1	AT5G57350.2;AT5G57350.1;AT3G60330.2;AT3G60330.1;AT4G11730.1	AT5G57350.2 | Symbols: HA3 | H(+)-ATPase 3 | chr5:23231208-23236381 REVERSE LENGTH=949;AT5G57350.1 | Symbols: AHA3, ATAHA3, HA3 | H(+)-ATPase 3 | chr5:23231208-23236381 REVERSE LENGTH=949
3	3	3	3	3	3	3	3	3		AT5G57120.1	AT5G57120.1	AT5G57120.1 | Symbols: | FUNCTIONS IN: molecular_function unknown;INVOLVED IN: biological_process unknown;LOCATED IN: nucleolus;EXPRESSED IN: 21 plant structures;EXPRESSED DURING: 13 growth stages;CONTAINS InterPro DOMAIN/s: LisH dimerisation motif (
3	3	3	3	3	3	3	3	3		AT5G57110.2;AT5G57110.1	AT5G57110.2;AT5G57110.1	AT5G57110.2 | Symbols: ACA8, AT-ACA8 | autoinhibited Ca2+ -ATPase, isoform 8 | chr5:23109729-23116857 REVERSE LENGTH=1074;AT5G57110.1 | Symbols: ACA8, AT-ACA8 | autoinhibited Ca2+ -ATPase, isoform 8 | chr5:23109729-23116857 REVERSE LENGTH=1074
3	3	3	3	3	3	3	3	3		AT5G56870.1	AT5G56870.1;AT4G26140.2;AT4G26140.1;AT1G45130.1;AT5G20710.1	AT5G56870.1 | Symbols: BGAL4 | beta-galactosidase 4 | chr5:23004284-23008410 FORWARD LENGTH=724
3	3	3	3	3	3	3	3	3		AT5G56710.1;AT5G56710.2	AT5G56710.1;AT5G56710.2	AT5G56710.1 | Symbols: | Ribosomal protein L31e family protein | chr5:22944003-22944767 REVERSE LENGTH=119;AT5G56710.2 | Symbols: | Ribosomal protein L31e family protein | chr5:22944003-22944767 REVERSE LENGTH=85
3	3	3	3	3	3	3	3	3		AT5G56680.1	AT5G56680.1;AT1G70980.1	AT5G56680.1 | Symbols: SYNC1, EMB2755, SYNC1 ARATH | Class II aminoacyl-tRNA and biotin synthetases superfamily protein | chr5:22936645-22938841 FORWARD LENGTH=572
3	3	3	3	3	3	3	3	3		AT5G56670.1;AT4G29390.1;AT2G19750.1	AT5G56670.1;AT4G29390.1;AT2G19750.1	AT5G56670.1 | Symbols: | Ribosomal protein S30 family protein | chr5:22935413-22935981 REVERSE LENGTH=62;AT4G29390.1 | Symbols: | Ribosomal protein S30 family protein | chr4:14465212-14465902 REVERSE LENGTH=62;AT2G19750.1 | Symbols: | Ribosomal protein
3	3	3	3	3	3	3	3	3		AT5G56630.1	AT5G56630.1;AT5G61580.2;AT5G61580.1	AT5G56630.1 | Symbols: PFK7 | phosphofructokinase 7 | chr5:22924311-22926728 FORWARD LENGTH=485
3	3	3	3	3	3	3	3	2		AT5G56460.1	AT5G56460.1	AT5G56460.1 | Symbols: | Protein kinase superfamily protein | chr5:22865509-22867866 FORWARD LENGTH=408
3	3	3	3	3	3	3	3	3		AT5G56350.1	AT5G56350.1;AT4G26390.1	AT5G56350.1 | Symbols: | Pyruvate kinase family protein | chr5:22820254-22822529 REVERSE LENGTH=498
3	3	3	3	3	3	3	3	2		AT5G56140.1	AT5G56140.1	AT5G56140.1 | Symbols: | RNA-binding KH domain-containing protein | chr5:22725462-22727932 FORWARD LENGTH=315
3	3	3	3	3	3	3	3	3		AT5G56030.1;AT5G56030.2	AT5G56030.1;AT5G56030.2	AT5G56030.1 | Symbols: HSP81-2, ERD8, HSP90.2, AtHsp90.2 | heat shock protein 81-2 | chr5:22686923-22689433 FORWARD LENGTH=699;AT5G56030.2 | Symbols: HSP81-2 | heat shock protein 81-2 | chr5:22686923-22689433 FORWARD LENGTH=728
3	3	3	3	3	3	3	3	3		AT5G56010.1;AT5G56000.1	AT5G56010.1;AT5G56000.1	AT5G56010.1 | Symbols: HSP81-3, Hsp81.3, AtHsp90-3, AtHsp90.3 | heat shock protein 81-3 | chr5:22681410-22683911 FORWARD LENGTH=699;AT5G56000.1 | Symbols: Hsp81.4, AtHsp90.4 | HEAT SHOCK PROTEIN 81.4 | chr5:22677602-22680067 REVERSE LENGTH=699
3	3	3	3	3	3	3	3	3		AT5G55920.1	AT5G55920.1	AT5G55920.1 | Symbols: OLI2 | S-adenosyl-L-methionine-dependent methyltransferases superfamily protein | chr5:22645742-22649383 REVERSE LENGTH=682
3	3	3	3	3	3	3	3	3		AT5G55670.2;AT5G55670.1	AT5G55670.2;AT5G55670.1	AT5G55670.2 | Symbols: | RNA-binding (RRM/RBD/RNP motifs) family protein | chr5:22544669-22546801 REVERSE LENGTH=585;AT5G55670.1 | Symbols: | RNA-binding (RRM/RBD/RNP motifs) family protein | chr5:22544669-22546801 REVERSE LENGTH=710
2	3	3	3	3	3	3	3	3		AT5G55660.1	AT5G55660.1	AT5G55660.1 | Symbols: | DEK domain-containing chromatin associated protein | chr5:22539375-22543142 FORWARD LENGTH=778
3	3	3	3	3	3	3	3	3		AT5G55610.2;AT5G55610.1	AT5G55610.2;AT5G55610.1	AT5G55610.2 | Symbols: | unknown protein;LOCATED IN: mitochondrion, plastid, membrane;EXPRESSED IN: 25 plant structures;EXPRESSED DURING: 13 growth stages;Has 35333 Blast hits to 34131 proteins in 2444 species: Archae - 798;Bacteria - 22429;Metazoa
3	3	3	3	3	3	3	3	3		AT5G55280.1	AT5G55280.1	AT5G55280.1 | Symbols: FTSZ1-1, ATFTSZ1-1, CPFTSZ | homolog of bacterial cytokinesis Z-ring protein FTSZ 1-1 | chr5:22420740-22422527 REVERSE LENGTH=433
3	3	3	3	3	3	3	3	3		AT5G55240.1	AT5G55240.1	AT5G55240.1 | Symbols: ATPXG2 | ARABIDOPSIS THALIANA PEROXYGENASE 2 | chr5:22405963-22407158 FORWARD LENGTH=243
2	3	3	3	3	3	3	3	3		AT5G55130.2;AT5G55130.1	AT5G55130.2;AT5G55130.1	AT5G55130.2 | Symbols: CNX5, SIR1 | co-factor for nitrate, reductase and xanthine dehydrogenase 5 | chr5:22373374-22376028 REVERSE LENGTH=437;AT5G55130.1 | Symbols: CNX5, SIR1 | co-factor for nitrate, reductase and xanthine dehydrogenase 5 | chr5:22373374-
3	3	3	3	3	3	3	3	3		AT5G55070.1	AT5G55070.1	AT5G55070.1 | Symbols: | Dihydrolipoamide succinyltransferase | chr5:22347637-22350409 FORWARD LENGTH=464
3	3	3	3	3	3	3	3	3		AT5G55050.1	AT5G55050.1	AT5G55050.1 | Symbols: | GDSL-like Lipase/Acylhydrolase superfamily protein | chr5:22337745-22339741 FORWARD LENGTH=376
3	3	3	3	3	3	3	3	3		AT5G55000.2;AT5G55000.1	AT5G55000.2;AT5G55000.1	AT5G55000.2 | Symbols: FIP2 | potassium channel tetramerisation domain-containing protein / pentapeptide repeat-containing protein | chr5:22318644-22321599 FORWARD LENGTH=298;AT5G55000.1 | Symbols: FIP2 | potassium channel tetramerisation domain-containing
2	3	3	3	3	3	3	3	3		AT5G54960.1	AT5G54960.1	AT5G54960.1 | Symbols: PDC2 | pyruvate decarboxylase-2 | chr5:22310858-22312681 REVERSE LENGTH=607
2	3	3	3	3	3	3	3	3		AT5G54900.1	AT5G54900.1	AT5G54900.1 | Symbols: ATRBP45A, RBP45A | RNA-binding protein 45A | chr5:22295412-22298126 FORWARD LENGTH=387
3	3	3	3	3	3	3	3	3		AT5G54810.1;AT4G27070.1	AT5G54810.1;AT4G27070.1	AT5G54810.1 | Symbols: TSB1, TRPB, TRP2, ATTSB1 | tryptophan synthase beta-subunit 1 | chr5:22264805-22266738 REVERSE LENGTH=470;AT4G27070.1 | Symbols: TSB2 | tryptophan synthase beta-subunit 2 | chr4:13586564-13588619 FORWARD LENGTH=475
3	3	3	3	3	3	3	3	3		AT5G54770.1	AT5G54770.1	AT5G54770.1 | Symbols: THI1, TZ, THI4 | thiazole biosynthetic enzyme, chloroplast (ARA6) (THI1) (THI4) | chr5:22246634-22247891 FORWARD LENGTH=349
3	3	3	3	3	3	3	3	3		AT5G54740.1	AT5G54740.1	AT5G54740.1 | Symbols: SESA5 | seed storage albumin 5 | chr5:22238640-22239137 REVERSE LENGTH=165
3	3	3	3	3	3	3	3	3		AT5G54640.1;AT4G27230.2;AT4G27230.1;AT1G51060.1	AT5G54640.1;AT4G27230.2;AT4G27230.1;AT1G51060.1	AT5G54640.1 | Symbols: HTA1, RAT5, ATHTA1 | Histone superfamily protein | chr5:22196540-22197279 FORWARD LENGTH=130;AT4G27230.2 | Symbols: HTA2 | histone H2A 2 | chr4:13637515-13638325 REVERSE LENGTH=131;AT4G27230.1 | Symbols: HTA2 | histone H2A 2 | chr4:1
3	3	3	3	3	3	3	3	3		AT5G54600.1;AT5G54600.2	AT5G54600.1;AT5G54600.2	AT5G54600.1 | Symbols: | Translation protein SH3-like family protein | chr5:22183046-22184403 FORWARD LENGTH=198;AT5G54600.2 | Symbols: | Translation protein SH3-like family protein | chr5:22183046-22184403 FORWARD LENGTH=179
3	3	3	3	3	3	3	3	3		AT5G54500.1;AT5G54500.2	AT5G54500.1;AT5G54500.2;AT4G27270.1	AT5G54500.1 | Symbols: FQR1 | flavodoxin-like quinone reductase 1 | chr5:22124674-22126256 FORWARD LENGTH=204;AT5G54500.2 | Symbols: FQR1 | flavodoxin-like quinone reductase 1 | chr5:22124674-22126435 FORWARD LENGTH=244
3	3	3	3	3	3	2	2	2		AT5G54440.1	AT5G54440.1	AT5G54440.1 | Symbols: CLUB, AtTRS130 | CLUB | chr5:22100056-22107695 FORWARD LENGTH=1259
2	3	1	3	3	3	2	3	3		AT5G54430.1	AT5G54430.1	AT5G54430.1 | Symbols: ATPHOS32, PHOS32 | Adenine nucleotide alpha hydrolases-like superfamily protein | chr5:22097563-22099693 REVERSE LENGTH=242
3	3	3	3	3	3	3	3	3		AT5G54270.1	AT5G54270.1	AT5G54270.1 | Symbols: LHCB3, LHCB3*1 | light-harvesting chlorophyll B-binding protein 3 | chr5:22038424-22039383 FORWARD LENGTH=265
3	3	3	3	3	3	3	3	3		AT5G54180.1	AT5G54180.1	AT5G54180.1 | Symbols: PTAC15 | plastid transcriptionally active 15 | chr5:21988544-21990183 FORWARD LENGTH=500
3	3	3	3	3	3	3	3	3		AT5G54160.1	AT5G54160.1	AT5G54160.1 | Symbols: ATOMT1, OMT1 | O-methyltransferase 1 | chr5:21982075-21984167 FORWARD LENGTH=363
3	3	3	3	3	3	3	3	3		AT5G54100.1	AT5G54100.1	AT5G54100.1 | Symbols: | SPFH/Band 7/PHB domain-containing membrane-associated protein family | chr5:21954035-21956500 REVERSE LENGTH=401
3	3	3	3	3	3	3	3	3		AT5G53930.1	AT5G53930.1	AT5G53930.1 | Symbols: | unknown protein;LOCATED IN: chloroplast;Has 1807 Blast hits to 1807 proteins in 277 species: Archae - 0;Bacteria - 0;Metazoa - 736;Fungi - 347;Plants - 385;Viruses - 0;Other Eukaryotes - 339 (source: NCBI BLink). | chr5:21
3	3	3	3	3	3	3	3	3		AT5G53860.1;AT5G53860.2;AT5G53860.5;AT5G53860.4;AT5G53860.3	AT5G53860.1;AT5G53860.2;AT5G53860.5;AT5G53860.4;AT5G53860.3	AT5G53860.1 | Symbols: EMB64, emb2737 | embryo defective 2737 | chr5:21865353-21868576 FORWARD LENGTH=402;AT5G53860.2 | Symbols: emb2737 | embryo defective 2737 | chr5:21865353-21868576 FORWARD LENGTH=422;AT5G53860.5 | Symbols: emb2737 | embryo defective 2
3	3	3	3	3	3	3	3	3		AT5G53800.1	AT5G53800.1	AT5G53800.1 | Symbols: | unknown protein;Has 30201 Blast hits to 17322 proteins in 780 species: Archae - 12;Bacteria - 1396;Metazoa - 17338;Fungi - 3422;Plants - 5037;Viruses - 0;Other Eukaryotes - 2996 (source: NCBI BLink). | chr5:21848180-2184993
3	3	3	3	3	3	3	3	3		AT5G53770.1	AT5G53770.1	AT5G53770.1 | Symbols: | Nucleotidyltransferase family protein | chr5:21826733-21829858 FORWARD LENGTH=530
3	3	3	3	3	3	3	3	3		AT5G53490.2;AT5G53490.1;AT5G53490.3	AT5G53490.2;AT5G53490.1;AT5G53490.3	AT5G53490.2 | Symbols: | Tetratricopeptide repeat (TPR)-like superfamily protein | chr5:21723488-21724621 REVERSE LENGTH=235;AT5G53490.1 | Symbols: | Tetratricopeptide repeat (TPR)-like superfamily protein | chr5:21723488-21724621 REVERSE LENGTH=236;AT5G
3	3	3	3	3	3	3	3	3		AT5G53480.1	AT5G53480.1	AT5G53480.1 | Symbols: | ARM repeat superfamily protein | chr5:21714016-21716709 FORWARD LENGTH=870
3	3	3	3	3	3	3	3	3		AT5G53460.3;AT5G53460.2;AT5G53460.1	AT5G53460.3;AT5G53460.2;AT5G53460.1	AT5G53460.3 | Symbols: GLT1 | NADH-dependent glutamate synthase 1 | chr5:21700518-21709629 FORWARD LENGTH=2208;AT5G53460.2 | Symbols: GLT1 | NADH-dependent glutamate synthase 1 | chr5:21700518-21709629 FORWARD LENGTH=2208;AT5G53460.1 | Symbols: GLT1 | NADH
3	3	3	3	3	3	3	3	3		AT5G53440.1	AT5G53440.1	AT5G53440.1 | Symbols: | unknown protein;FUNCTIONS IN: molecular_function unknown;INVOLVED IN: biological_process unknown;LOCATED IN: cytosol;EXPRESSED IN: 25 plant structures;EXPRESSED DURING: 15 growth stages;Has 1807 Blast hits to 1807 proteins i
0	0	0	2	3	3	1	1	3		AT5G53400.1	AT5G53400.1	AT5G53400.1 | Symbols: BOB1 | HSP20-like chaperones superfamily protein | chr5:21661588-21663383 FORWARD LENGTH=304
0	1	2	3	3	3	3	3	3		AT5G53330.1	AT5G53330.1	AT5G53330.1 | Symbols: | Ubiquitin-associated/translation elongation factor EF1B protein | chr5:21639236-21640716 FORWARD LENGTH=221
3	3	3	3	3	3	3	3	3		AT5G53060.1;AT5G53060.2	AT5G53060.1;AT5G53060.2	AT5G53060.1 | Symbols: | RNA-binding KH domain-containing protein | chr5:21515355-21518197 FORWARD LENGTH=652;AT5G53060.2 | Symbols: | RNA-binding KH domain-containing protein | chr5:21515355-21520310 FORWARD LENGTH=198
3	3	3	3	3	3	3	3	3		AT5G52920.1	AT5G52920.1	AT5G52920.1 | Symbols: PKP1, PKP-BETA1, PKP2 | plastidic pyruvate kinase beta subunit 1 | chr5:21463680-21466612 FORWARD LENGTH=579
3	3	3	3	3	3	3	3	3		AT5G52650.1	AT5G52650.1	AT5G52650.1 | Symbols: | RNA binding Plectin/S10 domain-containing protein | chr5:21355781-21357003 REVERSE LENGTH=179
3	3	3	3	3	3	3	3	3		AT5G52640.1	AT5G52640.1	AT5G52640.1 | Symbols: HSP81-1, ATHS83, HSP81.1, HSP83, ATHSP90.1, AtHsp90-1, HSP90.1 | heat shock protein 90.1 | chr5:21352542-21355147 FORWARD LENGTH=705
3	3	3	3	3	3	3	3	3		AT5G52560.1	AT5G52560.1	AT5G52560.1 | Symbols: ATUSP, USP | UDP-sugar pyrophosphorylase | chr5:21331230-21334573 FORWARD LENGTH=614
3	3	3	3	3	3	3	3	3		AT5G52530.3;AT5G52530.2;AT5G52530.1	AT5G52530.3;AT5G52530.2;AT5G52530.1	AT5G52530.3 | Symbols: | dentin sialophosphoprotein-related | chr5:21318215-21320882 FORWARD LENGTH=828;AT5G52530.2 | Symbols: | dentin sialophosphoprotein-related | chr5:21318215-21320882 FORWARD LENGTH=828;AT5G52530.1 | Symbols: | dentin sialophosphop
3	3	3	3	3	3	3	3	3		AT5G52520.1	AT5G52520.1	AT5G52520.1 | Symbols: OVA6, PRORS1 | Class II aaRS and biotin synthetases superfamily protein | chr5:21311112-21313875 FORWARD LENGTH=543
3	3	3	3	3	3	3	3	3		AT5G52470.1;AT5G52470.2	AT5G52470.1;AT5G52470.2	AT5G52470.1 | Symbols: FIB1, FBR1, ATFIB1, ATFBR1, SKIP7 | fibrillarin 1 | chr5:21294290-21296509 FORWARD LENGTH=308;AT5G52470.2 | Symbols: FIB1, FBR1, ATFIB1, ATFBR1, SKIP7 | fibrillarin 1 | chr5:21294290-21296409 FORWARD LENGTH=273
3	3	3	3	3	3	3	3	3		AT5G52040.1;AT5G52040.2;AT5G52040.4;AT5G52040.3	AT5G52040.1;AT5G52040.2;AT5G52040.4;AT5G52040.3	AT5G52040.1 | Symbols: ATRSP41, RS41, At-RS41 | RNA-binding (RRM/RBD/RNP motifs) family protein | chr5:21131081-21133318 FORWARD LENGTH=356;AT5G52040.2 | Symbols: ATRSP41, RS41, At-RS41 | RNA-binding (RRM/RBD/RNP motifs) family protein | chr5:21131081-2113
3	3	3	3	3	3	3	3	3		AT5G51970.2;AT5G51970.1	AT5G51970.2;AT5G51970.1	AT5G51970.2 | Symbols: | GroES-like zinc-binding alcohol dehydrogenase family protein | chr5:21111820-21113284 FORWARD LENGTH=364;AT5G51970.1 | Symbols: | GroES-like zinc-binding alcohol dehydrogenase family protein | chr5:21111820-21113284 FORWARD LENGT
3	3	3	2	3	3	2	3	3		AT5G51830.1	AT5G51830.1	AT5G51830.1 | Symbols: | pfkB-like carbohydrate kinase family protein | chr5:21069709-21071450 FORWARD LENGTH=343
3	3	3	3	3	3	3	3	3		AT5G51820.1	AT5G51820.1	AT5G51820.1 | Symbols: PGM, ATPGMP, PGM1, STF1 | phosphoglucomutase | chr5:21063531-21067933 REVERSE LENGTH=623
3	3	3	2	3	3	3	3	3		AT5G51750.1	AT5G51750.1	AT5G51750.1 | Symbols: ATSBT1.3, SBT1.3 | subtilase 1.3 | chr5:21020266-21022608 FORWARD LENGTH=780
2	3	3	3	3	3	3	3	3		AT5G51570.1	AT5G51570.1	AT5G51570.1 | Symbols: | SPFH/Band 7/PHB domain-containing membrane-associated protein family | chr5:20949511-20951234 FORWARD LENGTH=292
3	2	2	3	3	3	3	3	3		AT5G51430.1	AT5G51430.1	AT5G51430.1 | Symbols: EYE | conserved oligomeric Golgi complex component-related / COG complex component-related | chr5:20887044-20890795 REVERSE LENGTH=836
1	3	2	3	3	3	2	3	3		AT5G51410.3;AT5G51410.2;AT5G51410.1	AT5G51410.3;AT5G51410.2;AT5G51410.1	AT5G51410.3 | Symbols: | LUC7 N_terminus domain-containing protein | chr5:20881821-20883577 REVERSE LENGTH=334;AT5G51410.2 | Symbols: | LUC7 N_terminus domain-containing protein | chr5:20881821-20883577 REVERSE LENGTH=334;AT5G51410.1 | Symbols: | LUC7 N
0	0	0	3	3	3	3	3	3		AT5G51300.3;AT5G51300.2;AT5G51300.1	AT5G51300.3;AT5G51300.2;AT5G51300.1	AT5G51300.3 | Symbols: | splicing factor-related | chr5:20849881-20852295 REVERSE LENGTH=804;AT5G51300.2 | Symbols: | splicing factor-related | chr5:20849881-20852295 REVERSE LENGTH=804;AT5G51300.1 | Symbols: | splicing factor-related | chr5:20849881-20
3	3	3	3	3	3	3	3	3		AT5G51280.1;AT4G33370.1	AT5G51280.1;AT4G33370.1	AT5G51280.1 | Symbols: | DEAD-box protein abstrakt, putative | chr5:20841456-20843645 FORWARD LENGTH=591;AT4G33370.1 | Symbols: | DEA(D/H)-box RNA helicase family protein | chr4:16069669-16071405 REVERSE LENGTH=542
0	1	0	3	3	3	3	3	3		AT5G51180.2;AT5G51180.1	AT5G51180.2;AT5G51180.1	AT5G51180.2 | Symbols: | alpha/beta-Hydrolases superfamily protein | chr5:20797360-20799929 FORWARD LENGTH=357;AT5G51180.1 | Symbols: | alpha/beta-Hydrolases superfamily protein | chr5:20797360-20799929 FORWARD LENGTH=357
3	3	3	3	3	3	3	3	3		AT5G51120.1;AT5G51120.2	AT5G51120.1;AT5G51120.2;AT5G51120.3;AT5G65260.1	AT5G51120.1 | Symbols: PABN1, ATPABN1 | polyadenylate-binding protein 1 | chr5:20779760-20781241 FORWARD LENGTH=227;AT5G51120.2 | Symbols: PABN1 | polyadenylate-binding protein 1 | chr5:20779760-20781241 FORWARD LENGTH=265
3	3	3	3	3	3	3	3	3		AT5G51110.2;AT5G51110.1	AT5G51110.2;AT5G51110.1	AT5G51110.2 | Symbols: | Transcriptional coactivator/pterin dehydratase | chr5:20778316-20779380 REVERSE LENGTH=193;AT5G51110.1 | Symbols: | Transcriptional coactivator/pterin dehydratase | chr5:20778316-20779380 REVERSE LENGTH=220
2	1	1	3	3	2	3	3	3		AT5G51070.1	AT5G51070.1	AT5G51070.1 | Symbols: ERD1, CLPD, SAG15 | Clp ATPase | chr5:20764479-20768481 FORWARD LENGTH=945
3	3	3	3	3	3	3	3	3		AT5G50920.1	AT5G50920.1;AT2G25140.1	AT5G50920.1 | Symbols: CLPC, ATHSP93-V, HSP93-V, DCA1, CLPC1 | CLPC homologue 1 | chr5:20715710-20719800 REVERSE LENGTH=929
3	3	3	3	3	3	3	3	3		AT5G50850.1	AT5G50850.1	AT5G50850.1 | Symbols: MAB1 | Transketolase family protein | chr5:20689671-20692976 FORWARD LENGTH=363
3	3	3	3	3	3	3	3	3		AT5G50700.1;AT5G50600.1	AT5G50700.1;AT5G50600.1	AT5G50700.1 | Symbols: HSD1 | hydroxysteroid dehydrogenase 1 | chr5:20623259-20624995 REVERSE LENGTH=349;AT5G50600.1 | Symbols: ATHSD1, HSD1 | hydroxysteroid dehydrogenase 1 | chr5:20589917-20591653 REVERSE LENGTH=349
3	3	3	3	3	3	3	3	3		AT5G50310.1	AT5G50310.1	AT5G50310.1 | Symbols: | Galactose oxidase/kelch repeat superfamily protein | chr5:20474562-20479281 FORWARD LENGTH=666
1	3	3	3	3	3	3	3	3		AT5G50000.1	AT5G50000.1;AT4G14780.1;AT3G22750.1;AT3G01490.1	AT5G50000.1 | Symbols: | Protein kinase superfamily protein | chr5:20342838-20345033 REVERSE LENGTH=385
3	3	3	3	3	3	3	3	3		AT5G49910.1	AT5G49910.1	AT5G49910.1 | Symbols: CPHSC70-2EAT SHOCK PROTEIN 70-2, HSC70-7, cpHsc70-2 | chloroplast heat shock protein 70-2 | chr5:20303470-20306295 FORWARD LENGTH=718
3	3	3	3	3	3	3	3	3		AT5G49810.1	AT5G49810.1	AT5G49810.1 | Symbols: MMT | methionine S-methyltransferase | chr5:20239418-20246046 FORWARD LENGTH=1071
3	3	3	3	3	3	3	3	3		AT5G49460.1	AT5G49460.1	AT5G49460.1 | Symbols: ACLB-2 | ATP citrate lyase subunit B 2 | chr5:20055048-20058195 FORWARD LENGTH=608
3	3	3	3	3	3	3	3	2		AT5G49400.1	AT5G49400.1	AT5G49400.1 | Symbols: | zinc knuckle (CCHC-type) family protein | chr5:20031154-20031981 FORWARD LENGTH=275
3	3	3	3	3	3	3	3	3		AT5G49360.1	AT5G49360.1	AT5G49360.1 | Symbols: BXL1, ATBXL1 | beta-xylosidase 1 | chr5:20012179-20016659 REVERSE LENGTH=774
3	3	3	3	3	3	3	3	3		AT5G49030.1;AT5G49030.3;AT5G49030.2	AT5G49030.1;AT5G49030.3;AT5G49030.2	AT5G49030.1 | Symbols: OVA2 | tRNA synthetase class I (I, L, M and V) family protein | chr5:19875091-19882291 REVERSE LENGTH=1093;AT5G49030.3 | Symbols: OVA2 | tRNA synthetase class I (I, L, M and V) family protein | chr5:19875091-19883251 REVERSE LENGTH=1
3	3	3	3	3	3	3	3	3		AT5G48900.1	AT5G48900.1;AT3G24670.1	AT5G48900.1 | Symbols: | Pectin lyase-like superfamily protein | chr5:19825240-19828909 FORWARD LENGTH=417
3	3	3	3	3	3	3	3	3		AT5G48880.1;AT5G48880.3;AT5G48880.2	AT5G48880.1;AT5G48880.3;AT5G48880.2	AT5G48880.1 | Symbols: PKT1, KAT5 | peroxisomal 3-keto-acyl-CoA thiolase 2 | chr5:19814576-19816775 REVERSE LENGTH=414;AT5G48880.3 | Symbols: | peroxisomal 3-keto-acyl-CoA thiolase 2 | chr5:19814576-19817021 REVERSE LENGTH=457;AT5G48880.2 | Symbols: PKT2,
3	3	3	3	3	3	3	3	3		AT5G48790.1	AT5G48790.1	AT5G48790.1 | Symbols: | Domain of unknown function (DUF1995) | chr5:19780010-19781977 REVERSE LENGTH=316
3	3	3	3	3	3	3	3	3		AT5G48760.2;AT5G48760.1	AT5G48760.2;AT5G48760.1	AT5G48760.2 | Symbols: | Ribosomal protein L13 family protein | chr5:19771315-19772686 REVERSE LENGTH=206;AT5G48760.1 | Symbols: | Ribosomal protein L13 family protein | chr5:19771315-19772686 REVERSE LENGTH=206
3	3	3	3	3	3	3	3	3		AT5G48620.1	AT5G48620.1	AT5G48620.1 | Symbols: | Disease resistance protein (CC-NBS-LRR class) family | chr5:19717406-19720932 FORWARD LENGTH=908
3	3	3	3	3	3	3	3	3		AT5G48300.1	AT5G48300.1	AT5G48300.1 | Symbols: ADG1, APS1 | ADP glucose pyrophosphorylase 1 | chr5:19570326-19572557 FORWARD LENGTH=520
3	3	3	3	3	3	3	3	3		AT5G48230.2;AT5G48230.1	AT5G48230.2;AT5G48230.1	AT5G48230.2 | Symbols: EMB1276, ACAT2 | acetoacetyl-CoA thiolase 2 | chr5:19552570-19555122 REVERSE LENGTH=403;AT5G48230.1 | Symbols: EMB1276, ACAT2 | acetoacetyl-CoA thiolase 2 | chr5:19552570-19555030 REVERSE LENGTH=398
3	3	3	3	3	3	3	3	3		AT5G48180.1	AT5G48180.1	AT5G48180.1 | Symbols: NSP5 | nitrile specifier protein 5 | chr5:19541283-19542358 REVERSE LENGTH=326
3	3	3	3	3	3	3	3	3		AT5G47930.1	AT5G47930.1	AT5G47930.1 | Symbols: | Zinc-binding ribosomal protein family protein | chr5:19406423-19407329 REVERSE LENGTH=84
3	3	3	3	3	3	3	3	3		AT5G47880.2;AT5G47880.1	AT5G47880.2;AT5G47880.1	AT5G47880.2 | Symbols: ERF1-1 | eukaryotic release factor 1-1 | chr5:19386555-19387865 REVERSE LENGTH=436;AT5G47880.1 | Symbols: ERF1-1 | eukaryotic release factor 1-1 | chr5:19386555-19387865 REVERSE LENGTH=436
1	1	2	3	2	3	3	2	3		AT5G47820.2;AT5G47820.1	AT5G47820.2;AT5G47820.1;AT3G50240.1;AT5G60930.1	AT5G47820.2 | Symbols: FRA1 | P-loop containing nucleoside triphosphate hydrolases superfamily protein | chr5:19366505-19372229 FORWARD LENGTH=1035;AT5G47820.1 | Symbols: FRA1 | P-loop containing nucleoside triphosphate hydrolases superfamily protein | chr
3	3	3	3	3	3	3	3	3		AT5G47770.1	AT5G47770.1;AT4G17190.1	AT5G47770.1 | Symbols: FPS1 | farnesyl diphosphate synthase 1 | chr5:19345297-19347415 FORWARD LENGTH=384
3	3	3	3	3	3	3	3	3		AT5G47690.2;AT5G47690.3;AT5G47690.1	AT5G47690.2;AT5G47690.3;AT5G47690.1	AT5G47690.2 | Symbols: | binding | chr5:19317899-19327014 FORWARD LENGTH=1606;AT5G47690.3 | Symbols: | binding | chr5:19317899-19327014 FORWARD LENGTH=1607;AT5G47690.1 | Symbols: | binding | chr5:19317899-19327014 FORWARD LENGTH=1605
3	3	3	3	3	3	3	3	3		AT5G47430.2;AT5G47430.3;AT5G47430.1	AT5G47430.2;AT5G47430.3;AT5G47430.1;AT4G17410.1;AT4G17410.3;AT4G17410.2	AT5G47430.2 | Symbols: | DWNN domain, a CCHC-type zinc finger | chr5:19235819-19240147 REVERSE LENGTH=831;AT5G47430.3 | Symbols: | DWNN domain, a CCHC-type zinc finger | chr5:19235819-19240596 REVERSE LENGTH=889;AT5G47430.1 | Symbols: | DWNN domain, a C
3	3	3	3	3	3	3	3	3		AT5G47210.1;AT5G47210.3;AT5G47210.2	AT5G47210.1;AT5G47210.3;AT5G47210.2	AT5G47210.1 | Symbols: | Hyaluronan / mRNA binding family | chr5:19169222-19171012 REVERSE LENGTH=357;AT5G47210.3 | Symbols: | Hyaluronan / mRNA binding family | chr5:19169388-19171012 REVERSE LENGTH=301;AT5G47210.2 | Symbols: | Hyaluronan / mRNA bindin
3	3	3	3	3	3	3	3	3		AT5G47200.1	AT5G47200.1	AT5G47200.1 | Symbols: ATRABD2B, ATRAB1A, RAB1A | RAB GTPase homolog 1A | chr5:19167029-19168718 FORWARD LENGTH=202
3	3	3	3	3	3	3	3	3		AT5G47190.1	AT5G47190.1	AT5G47190.1 | Symbols: | Ribosomal protein L19 family protein | chr5:19164432-19166064 REVERSE LENGTH=229
3	3	3	3	3	3	3	3	3		AT5G47040.1	AT5G47040.1	AT5G47040.1 | Symbols: LON2 | lon protease 2 | chr5:19093356-19098678 REVERSE LENGTH=888
3	3	3	3	3	3	3	3	3		AT5G47010.1	AT5G47010.1	AT5G47010.1 | Symbols: UPF1, LBA1, ATUPF1 | RNA helicase, putative | chr5:19072009-19078856 FORWARD LENGTH=1254
3	3	3	3	3	3	3	3	3		AT5G46840.1;AT5G46840.2	AT5G46840.1;AT5G46840.2	AT5G46840.1 | Symbols: | RNA-binding (RRM/RBD/RNP motifs) family protein | chr5:19005651-19007609 FORWARD LENGTH=501;AT5G46840.2 | Symbols: | RNA-binding (RRM/RBD/RNP motifs) family protein | chr5:19006062-19007609 FORWARD LENGTH=364
3	3	3	3	3	3	3	3	3		AT5G46800.1	AT5G46800.1	AT5G46800.1 | Symbols: BOU | Mitochondrial substrate carrier family protein | chr5:18988779-18989810 REVERSE LENGTH=300
3	3	3	3	3	3	3	3	3		AT5G46790.1	AT5G46790.1	AT5G46790.1 | Symbols: PYL1, RCAR12 | PYR1-like 1 | chr5:18984063-18984728 REVERSE LENGTH=221
3	3	3	3	3	3	3	3	3		AT5G46750.1	AT5G46750.1	AT5G46750.1 | Symbols: AGD9 | ARF-GAP domain 9 | chr5:18969950-18971817 REVERSE LENGTH=402
3	3	3	3	3	3	3	3	3		AT5G46630.1;AT5G46630.2	AT5G46630.1;AT5G46630.2	AT5G46630.1 | Symbols: | Clathrin adaptor complexes medium subunit family protein | chr5:18920580-18923252 FORWARD LENGTH=438;AT5G46630.2 | Symbols: | Clathrin adaptor complexes medium subunit family protein | chr5:18920580-18923060 FORWARD LENGTH=441
3	3	3	3	3	3	3	3	3		AT5G46580.1	AT5G46580.1	AT5G46580.1 | Symbols: | pentatricopeptide (PPR) repeat-containing protein | chr5:18897510-18899645 REVERSE LENGTH=711
3	3	3	3	3	3	3	3	3		AT5G46430.2;AT5G46430.1	AT5G46430.2;AT5G46430.1	AT5G46430.2 | Symbols: | Ribosomal protein L32e | chr5:18833429-18834409 FORWARD LENGTH=133;AT5G46430.1 | Symbols: | Ribosomal protein L32e | chr5:18833429-18834409 FORWARD LENGTH=133
3	3	3	3	3	3	3	3	3		AT5G46290.1;AT5G46290.2;AT5G46290.3	AT5G46290.1;AT5G46290.2;AT5G46290.3	AT5G46290.1 | Symbols: KASI, KAS1 | 3-ketoacyl-acyl carrier protein synthase I | chr5:18774439-18776629 REVERSE LENGTH=473;AT5G46290.2 | Symbols: KASI, KAS1 | 3-ketoacyl-acyl carrier protein synthase I | chr5:18774439-18776629 REVERSE LENGTH=418;AT5G46290.
3	3	3	3	3	3	3	3	3		AT5G46110.2;AT5G46110.3;AT5G46110.1;AT5G46110.4	AT5G46110.2;AT5G46110.3;AT5G46110.1;AT5G46110.4	AT5G46110.2 | Symbols: APE2, TPT | Glucose-6-phosphate/phosphate translocator-related | chr5:18698019-18700212 FORWARD LENGTH=297;AT5G46110.3 | Symbols: APE2, TPT | Glucose-6-phosphate/phosphate translocator-related | chr5:18697606-18700212 FORWARD LENGTH=
3	3	3	3	3	3	3	3	3		AT5G46070.1	AT5G46070.1	AT5G46070.1 | Symbols: | Guanylate-binding family protein | chr5:18683468-18688397 FORWARD LENGTH=1082
3	3	3	3	3	3	3	3	3		AT5G45950.1	AT5G45950.1	AT5G45950.1 | Symbols: | GDSL-like Lipase/Acylhydrolase superfamily protein | chr5:18634155-18636512 FORWARD LENGTH=357
3	3	3	3	3	3	3	3	3		AT5G45930.1	AT5G45930.1	AT5G45930.1 | Symbols: CHLI2, CHL I2, CHLI-2 | magnesium chelatase i2 | chr5:18628095-18629565 FORWARD LENGTH=418
3	3	3	3	3	3	3	3	3		AT5G45775.1;AT5G45775.2;AT4G18730.1;AT3G58700.1;AT2G42740.1	AT5G45775.1;AT5G45775.2;AT4G18730.1;AT3G58700.1;AT2G42740.1	AT5G45775.1 | Symbols: | Ribosomal L5P family protein | chr5:18565281-18566377 REVERSE LENGTH=172;AT5G45775.2 | Symbols: | Ribosomal L5P family protein | chr5:18565281-18566496 REVERSE LENGTH=182;AT4G18730.1 | Symbols: RPL16B | ribosomal protein L16B | c
3	3	2	3	3	3	3	3	3		AT5G45690.1	AT5G45690.1;AT4G18920.1	AT5G45690.1 | Symbols: | Protein of unknown function (DUF1264) | chr5:18535139-18536259 REVERSE LENGTH=247
3	3	3	3	3	3	3	3	3		AT5G45590.1	AT5G45590.1	AT5G45590.1 | Symbols: | Ribosomal protein L35 | chr5:18484643-18486227 REVERSE LENGTH=173
3	3	3	3	3	3	3	3	3		AT5G45390.1	AT5G45390.1	AT5G45390.1 | Symbols: CLPP4, NCLPP4 | CLP protease P4 | chr5:18396351-18397586 FORWARD LENGTH=292
3	3	3	3	3	3	3	3	3		AT5G45280.2;AT5G45280.1	AT5G45280.2;AT5G45280.1	AT5G45280.2 | Symbols: | Pectinacetylesterase family protein | chr5:18346862-18349488 FORWARD LENGTH=391;AT5G45280.1 | Symbols: | Pectinacetylesterase family protein | chr5:18346862-18349432 FORWARD LENGTH=370
3	3	3	3	3	3	3	3	3		AT5G44800.1	AT5G44800.1	AT5G44800.1 | Symbols: CHR4, PKR1 | chromatin remodeling 4 | chr5:18083659-18092162 REVERSE LENGTH=2223
0	3	3	1	3	3	1	3	2		AT5G44635.1	AT5G44635.1	AT5G44635.1 | Symbols: MCM6 | minichromosome maintenance (MCM2/3/5) family protein | chr5:18006431-18010542 REVERSE LENGTH=831
3	3	3	3	3	3	3	3	3		AT5G44500.2;AT5G44500.1;AT4G20440.4;AT4G20440.3;AT4G20440.2;AT4G20440.1	AT5G44500.2;AT5G44500.1;AT4G20440.4;AT4G20440.3;AT4G20440.2;AT4G20440.1	AT5G44500.2 | Symbols: | Small nuclear ribonucleoprotein family protein | chr5:17927505-17928269 FORWARD LENGTH=254;AT5G44500.1 | Symbols: | Small nuclear ribonucleoprotein family protein | chr5:17927505-17928269 FORWARD LENGTH=254;AT4G20440.4 | Symbols:
3	3	3	1	2	2	1	1	2		AT5G44380.1	AT5G44380.1;AT5G44390.1	AT5G44380.1 | Symbols: | FAD-binding Berberine family protein | chr5:17878873-17881369 REVERSE LENGTH=541
3	3	3	3	3	3	3	3	3		AT5G44340.1	AT5G44340.1;CON__ENSEMBL:ENSBTAP00000025008	AT5G44340.1 | Symbols: TUB4 | tubulin beta chain 4 | chr5:17859442-17860994 REVERSE LENGTH=444
2	3	3	3	3	3	3	3	3		AT5G44320.1;AT4G20980.4;AT4G20980.3;AT4G20980.2;AT4G20980.1	AT5G44320.1;AT4G20980.4;AT4G20980.3;AT4G20980.2;AT4G20980.1	AT5G44320.1 | Symbols: | Eukaryotic translation initiation factor 3 subunit 7 (eIF-3) | chr5:17854901-17856667 REVERSE LENGTH=588;AT4G20980.4 | Symbols: | Eukaryotic translation initiation factor 3 subunit 7 (eIF-3) | chr4:11216997-11218772 FORWARD LENGT
3	3	3	3	3	3	3	3	3		AT5G44180.1;AT5G44180.2	AT5G44180.1;AT5G44180.2	AT5G44180.1 | Symbols: | Homeodomain-like transcriptional regulator | chr5:17783172-17789872 FORWARD LENGTH=1694;AT5G44180.2 | Symbols: | Homeodomain-like transcriptional regulator | chr5:17783172-17789872 FORWARD LENGTH=1507
3	3	3	3	3	3	3	3	3		AT5G44120.3;AT5G44120.2;AT5G44120.1	AT5G44120.3;AT5G44120.2;AT5G44120.1	AT5G44120.3 | Symbols: CRA1, ATCRA1, CRU1 | RmlC-like cupins superfamily protein | chr5:17756460-17758246 REVERSE LENGTH=472;AT5G44120.2 | Symbols: CRA1, ATCRA1, CRU1 | RmlC-like cupins superfamily protein | chr5:17756460-17757811 REVERSE LENGTH=368;AT5G44
3	3	3	3	3	3	3	3	3		AT5G44070.1	AT5G44070.1;AT1G03980.1	AT5G44070.1 | Symbols: CAD1, ARA8, ATPCS1, PCS1 | phytochelatin synthase 1 (PCS1) | chr5:17734876-17737672 FORWARD LENGTH=485
3	3	3	3	3	3	3	3	3		AT5G44020.1	AT5G44020.1	AT5G44020.1 | Symbols: | HAD superfamily, subfamily IIIB acid phosphatase | chr5:17712433-17714046 FORWARD LENGTH=272
3	3	3	3	3	3	3	3	3		AT5G43960.2;AT5G43960.1	AT5G43960.2;AT5G43960.1	AT5G43960.2 | Symbols: | Nuclear transport factor 2 (NTF2) family protein with RNA binding (RRM-RBD-RNP motifs) domain | chr5:17689154-17691220 REVERSE LENGTH=391;AT5G43960.1 | Symbols: | Nuclear transport factor 2 (NTF2) family protein with RNA binding
3	3	3	3	3	3	3	3	3		AT5G43940.1;AT5G43940.2	AT5G43940.1;AT5G43940.2	AT5G43940.1 | Symbols: HOT5, ADH2, GSNOR, ATGSNOR1, PAR2 | GroES-like zinc-binding dehydrogenase family protein | chr5:17684265-17686379 FORWARD LENGTH=379;AT5G43940.2 | Symbols: HOT5 | GroES-like zinc-binding dehydrogenase family protein | chr5:17684265-1
3	3	3	3	3	3	3	3	3		AT5G43900.1;AT5G43900.3;AT5G43900.2	AT5G43900.1;AT5G43900.3;AT5G43900.2;AT1G04600.1;AT2G33240.1	AT5G43900.1 | Symbols: MYA2, ATMYA2, XI-2, XI-6 | myosin 2 | chr5:17657241-17666653 REVERSE LENGTH=1505;AT5G43900.3 | Symbols: MYA2 | myosin 2 | chr5:17657241-17667413 REVERSE LENGTH=1565;AT5G43900.2 | Symbols: MYA2 | myosin 2 | chr5:17657241-17667413 REVE
3	3	3	3	3	3	3	3	3		AT5G43830.1	AT5G43830.1	AT5G43830.1 | Symbols: | Aluminium induced protein with YGL and LRDR motifs | chr5:17622593-17624239 REVERSE LENGTH=251
3	3	3	3	3	3	3	3	3		AT5G43780.1	AT5G43780.1	AT5G43780.1 | Symbols: APS4 | Pseudouridine synthase/archaeosine transglycosylase-like family protein | chr5:17589631-17591480 REVERSE LENGTH=469
0	0	0	1	2	3	2	0	1		AT5G43130.1;AT5G43130.2	AT5G43130.1;AT5G43130.2	AT5G43130.1 | Symbols: TAF4, TAF4B | TBP-associated factor 4 | chr5:17315608-17321144 REVERSE LENGTH=823;AT5G43130.2 | Symbols: TAF4 | TBP-associated factor 4 | chr5:17315608-17321144 REVERSE LENGTH=852
3	3	3	3	3	3	3	3	3		AT5G43060.1	AT5G43060.1	AT5G43060.1 | Symbols: | Granulin repeat cysteine protease family protein | chr5:17269784-17272117 REVERSE LENGTH=463
2	3	3	3	3	3	3	3	3		AT5G42980.1	AT5G42980.1	AT5G42980.1 | Symbols: ATTRX3, ATH3, ATTRXH3, TRXH3, TRX3 | thioredoxin 3 | chr5:17242772-17243718 FORWARD LENGTH=118
3	3	3	3	3	3	3	3	3		AT5G42960.1	AT5G42960.1	AT5G42960.1 | Symbols: | unknown protein;FUNCTIONS IN: molecular_function unknown;INVOLVED IN: biological_process unknown;LOCATED IN: mitochondrion, chloroplast, plastid, chloroplast envelope;EXPRESSED IN: 24 plant structures;EXPRESSED DURING: 13 gro
3	3	3	3	3	3	3	3	3		AT5G42820.2;AT5G42820.1	AT5G42820.2;AT5G42820.1	AT5G42820.2 | Symbols: ATU2AF35B, U2AF35B | Zinc finger C-x8-C-x5-C-x3-H type family protein | chr5:17170445-17171296 REVERSE LENGTH=283;AT5G42820.1 | Symbols: ATU2AF35B, U2AF35B | Zinc finger C-x8-C-x5-C-x3-H type family protein | chr5:17170445-17171296 R
3	3	3	3	3	3	3	3	3		AT5G42790.1;AT1G47250.1	AT5G42790.1;AT1G47250.1	AT5G42790.1 | Symbols: PAF1, ATPSM30, ARS5 | proteasome alpha subunit F1 | chr5:17159270-17160975 REVERSE LENGTH=278;AT1G47250.1 | Symbols: PAF2 | 20S proteasome alpha subunit F2 | chr1:17319220-17320900 FORWARD LENGTH=277
3	3	3	3	3	3	3	3	3		AT5G42740.1	AT5G42740.1	AT5G42740.1 | Symbols: | Sugar isomerase (SIS) family protein | chr5:17136080-17140622 FORWARD LENGTH=560
3	3	3	3	3	3	3	3	3		AT5G42390.1	AT5G42390.1	AT5G42390.1 | Symbols: | Insulinase (Peptidase family M16) family protein | chr5:16945308-16952647 FORWARD LENGTH=1265
3	3	3	3	3	3	3	3	3		AT5G42310.1	AT5G42310.1	AT5G42310.1 | Symbols: | Pentatricopeptide repeat (PPR-like) superfamily protein | chr5:16915860-16918238 FORWARD LENGTH=709
3	3	3	3	3	3	3	3	3		AT5G42270.1;AT1G50250.1	AT5G42270.1;AT1G50250.1	AT5G42270.1 | Symbols: VAR1, FTSH5 | FtsH extracellular protease family | chr5:16902659-16905102 FORWARD LENGTH=704;AT1G50250.1 | Symbols: FTSH1 | FTSH protease 1 | chr1:18614398-18616930 REVERSE LENGTH=716
3	3	3	3	3	3	3	3	3		AT5G42130.1	AT5G42130.1	AT5G42130.1 | Symbols: | Mitochondrial substrate carrier family protein | chr5:16835572-16836810 REVERSE LENGTH=412
3	3	3	3	3	3	3	3	3		AT5G42080.1;AT5G42080.3;AT5G42080.2	AT5G42080.1;AT5G42080.3;AT5G42080.2	AT5G42080.1 | Symbols: ADL1, ADL1A, AG68, DRP1A, RSW9, DL1 | dynamin-like protein | chr5:16820661-16824536 REVERSE LENGTH=610;AT5G42080.3 | Symbols: DL1 | dynamin-like protein | chr5:16820661-16824536 REVERSE LENGTH=604;AT5G42080.2 | Symbols: ADL1, ADL1A,
3	3	3	3	3	3	3	3	3		AT5G42030.1	AT5G42030.1	AT5G42030.1 | Symbols: ABIL4 | ABL interactor-like protein 4 | chr5:16811518-16813087 REVERSE LENGTH=279
3	3	3	3	3	3	3	3	3		AT5G42020.1;AT5G42020.2	AT5G42020.1;AT5G42020.2	AT5G42020.1 | Symbols: BIP, BIP2 | Heat shock protein 70 (Hsp 70) family protein | chr5:16807697-16810480 REVERSE LENGTH=668;AT5G42020.2 | Symbols: BIP | Heat shock protein 70 (Hsp 70) family protein | chr5:16807697-16810480 REVERSE LENGTH=613
0	1	2	2	1	3	1	3	3		AT5G41880.1	AT5G41880.1	AT5G41880.1 | Symbols: POLA3, POLA4 | DNA primases;DNA primases | chr5:16761071-16764074 FORWARD LENGTH=451
3	3	3	3	3	3	3	3	3		AT5G41770.1	AT5G41770.1;AT5G45990.1;AT3G13210.1	AT5G41770.1 | Symbols: | crooked neck protein, putative / cell cycle protein, putative | chr5:16718021-16720936 FORWARD LENGTH=705
3	3	3	3	3	3	3	3	3		AT5G41670.2;AT5G41670.1	AT5G41670.2;AT5G41670.1	AT5G41670.2 | Symbols: | 6-phosphogluconate dehydrogenase family protein | chr5:16665647-16667110 REVERSE LENGTH=487;AT5G41670.1 | Symbols: | 6-phosphogluconate dehydrogenase family protein | chr5:16665647-16667110 REVERSE LENGTH=487
3	3	3	3	3	3	3	3	3		AT5G41520.1;AT5G41520.2	AT5G41520.1;AT5G41520.2	AT5G41520.1 | Symbols: | RNA binding Plectin/S10 domain-containing protein | chr5:16609377-16610583 REVERSE LENGTH=180;AT5G41520.2 | Symbols: | RNA binding Plectin/S10 domain-containing protein | chr5:16609377-16610203 REVERSE LENGTH=134
3	3	3	3	3	3	3	3	3		AT5G41210.1	AT5G41210.1	AT5G41210.1 | Symbols: ATGSTT1, GST10, GSTT1 | glutathione S-transferase THETA 1 | chr5:16492550-16493884 REVERSE LENGTH=245
3	3	3	3	3	3	3	3	3		AT5G41020.1	AT5G41020.1	AT5G41020.1 | Symbols: | myb family transcription factor | chr5:16425883-16427649 REVERSE LENGTH=588
3	3	3	3	3	3	3	3	3		AT5G40950.1	AT5G40950.1	AT5G40950.1 | Symbols: RPL27 | ribosomal protein large subunit 27 | chr5:16410866-16411845 FORWARD LENGTH=198
3	3	3	3	3	3	3	3	3		AT5G40890.1;AT5G40890.2	AT5G40890.1;AT5G40890.2;AT3G27170.1	AT5G40890.1 | Symbols: ATCLC-A, CLC-A, CLCA, ATCLCA | chloride channel A | chr5:16381645-16384999 REVERSE LENGTH=775;AT5G40890.2 | Symbols: ATCLC-A, CLC-A, CLCA, ATCLCA | chloride channel A | chr5:16381645-16383821 REVERSE LENGTH=643
3	3	3	3	3	3	3	3	3		AT5G40870.1	AT5G40870.1	AT5G40870.1 | Symbols: ATUK/UPRT1, UKL1, UK/UPRT1 | uridine kinase/uracil phosphoribosyltransferase 1 | chr5:16375021-16378384 FORWARD LENGTH=486
3	3	3	3	3	3	3	3	3		AT5G40770.1	AT5G40770.1;AT5G14300.1	AT5G40770.1 | Symbols: ATPHB3, PHB3 | prohibitin 3 | chr5:16315589-16316621 REVERSE LENGTH=277
3	3	3	3	3	3	3	3	3		AT5G40490.1	AT5G40490.1	AT5G40490.1 | Symbols: | RNA-binding (RRM/RBD/RNP motifs) family protein | chr5:16225483-16227423 FORWARD LENGTH=423
3	3	3	3	3	3	3	3	3		AT5G40420.1	AT5G40420.1	AT5G40420.1 | Symbols: OLEO2, OLE2 | oleosin 2 | chr5:16173622-16174740 REVERSE LENGTH=199
3	3	3	3	3	3	3	3	3		AT5G40340.1	AT5G40340.1	AT5G40340.1 | Symbols: | Tudor/PWWP/MBT superfamily protein | chr5:16131654-16134680 REVERSE LENGTH=1008
3	3	3	3	3	3	3	3	3		AT5G40200.1	AT5G40200.1	AT5G40200.1 | Symbols: DegP9 | DegP protease 9 | chr5:16070402-16073101 FORWARD LENGTH=592
3	3	3	3	3	3	3	3	3		AT5G39740.2;AT5G39740.1	AT5G39740.2;AT5G39740.1	AT5G39740.2 | Symbols: RPL5B | ribosomal protein L5 B | chr5:15903484-15905185 FORWARD LENGTH=301;AT5G39740.1 | Symbols: OLI7, RPL5B | ribosomal protein L5 B | chr5:15903365-15905185 FORWARD LENGTH=301
2	2	3	3	3	3	3	3	3		AT5G39590.1	AT5G39590.1	AT5G39590.1 | Symbols: | TLD-domain containing nucleolar protein | chr5:15851483-15853768 FORWARD LENGTH=542
3	3	3	3	3	3	3	3	3		AT5G39580.1;AT5G39580.2	AT5G39580.1;AT5G39580.2	AT5G39580.1 | Symbols: | Peroxidase superfamily protein | chr5:15847281-15849027 REVERSE LENGTH=319;AT5G39580.2 | Symbols: | Peroxidase superfamily protein | chr5:15847531-15849027 REVERSE LENGTH=236
3	3	3	3	3	3	3	3	3		AT5G39570.1	AT5G39570.1	AT5G39570.1 | Symbols: | FUNCTIONS IN: molecular_function unknown;INVOLVED IN: biological_process unknown;LOCATED IN: cytosol, nucleus;EXPRESSED IN: 25 plant structures;EXPRESSED DURING: 14 growth stages;BEST Arabidopsis thaliana protein match is: gl
3	3	3	3	3	3	3	3	3		AT5G39500.1	AT5G39500.1	AT5G39500.1 | Symbols: GNL1, ERMO1 | GNOM-like 1 | chr5:15815274-15819910 FORWARD LENGTH=1443
3	3	3	3	3	3	3	3	3		AT5G39410.1	AT5G39410.1	AT5G39410.1 | Symbols: | Saccharopine dehydrogenase | chr5:15768415-15770274 REVERSE LENGTH=454
3	3	3	3	3	3	3	3	3		AT5G39320.1	AT5G39320.1	AT5G39320.1 | Symbols: | UDP-glucose 6-dehydrogenase family protein | chr5:15743254-15744696 FORWARD LENGTH=480
0	1	2	0	1	3	2	3	3		AT5G38840.1	AT5G38840.1	AT5G38840.1 | Symbols: | SMAD/FHA domain-containing protein | chr5:15551329-15554846 FORWARD LENGTH=735
3	3	3	3	3	3	3	3	3		AT5G38830.1	AT5G38830.1	AT5G38830.1 | Symbols: | Cysteinyl-tRNA synthetase, class Ia family protein | chr5:15545764-15548094 REVERSE LENGTH=511
3	3	3	3	3	3	3	3	3		AT5G38720.1	AT5G38720.1	AT5G38720.1 | Symbols: | unknown protein;Has 13419 Blast hits to 9093 proteins in 698 species: Archae - 38;Bacteria - 1038;Metazoa - 4949;Fungi - 1086;Plants - 485;Viruses - 44;Other Eukaryotes - 5779 (source: NCBI BLink). | chr5:15508417-15510472
3	3	3	3	3	3	3	3	3		AT5G38660.1;AT5G38660.2	AT5G38660.1;AT5G38660.2	AT5G38660.1 | Symbols: APE1 | acclimation of photosynthesis to environment | chr5:15473285-15475497 REVERSE LENGTH=286;AT5G38660.2 | Symbols: APE1 | acclimation of photosynthesis to environment | chr5:15471208-15475497 REVERSE LENGTH=431
3	3	3	3	3	3	3	3	3		AT5G38600.1	AT5G38600.1	AT5G38600.1 | Symbols: | Proline-rich spliceosome-associated (PSP) family protein / zinc knuckle (CCHC-type) family protein | chr5:15457386-15460466 FORWARD LENGTH=532
3	3	3	3	3	3	3	3	3		AT5G38530.1	AT5G38530.1	AT5G38530.1 | Symbols: TSBtype2 | tryptophan synthase beta type 2 | chr5:15424097-15426294 FORWARD LENGTH=506
3	3	3	3	3	3	3	3	3		AT5G38480.1;AT5G38480.2	AT5G38480.1;AT5G38480.2	AT5G38480.1 | Symbols: GRF3, RCI1 | general regulatory factor 3 | chr5:15410277-15411285 FORWARD LENGTH=255;AT5G38480.2 | Symbols: GRF3, RCI1 | general regulatory factor 3 | chr5:15410277-15411285 FORWARD LENGTH=254
3	3	3	3	3	3	3	3	3		AT5G38430.1	AT5G38430.1	AT5G38430.1 | Symbols: | Ribulose bisphosphate carboxylase (small chain) family protein | chr5:15384350-15385155 REVERSE LENGTH=181
3	3	3	3	3	3	3	3	3		AT5G38410.1;AT5G38410.3;AT5G38410.2	AT5G38410.1;AT5G38410.3;AT5G38410.2	AT5G38410.1 | Symbols: | Ribulose bisphosphate carboxylase (small chain) family protein | chr5:15377501-15378306 REVERSE LENGTH=181;AT5G38410.3 | Symbols: | Ribulose bisphosphate carboxylase (small chain) family protein | chr5:15377501-15378306 REVERSE L
3	3	3	3	3	3	3	3	3		AT5G37830.1	AT5G37830.1	AT5G37830.1 | Symbols: OXP1 | oxoprolinase 1 | chr5:15056635-15060525 REVERSE LENGTH=1266
3	3	3	3	3	3	3	3	3		AT5G37780.1;AT1G66410.1;AT1G66410.2;AT5G37780.2;AT5G37780.3	AT5G37780.1;AT1G66410.1;AT1G66410.2;AT5G37780.2;AT5G37780.3	AT5G37780.1 | Symbols: CAM1, TCH1, ACAM-1 | calmodulin 1 | chr5:15004769-15006117 REVERSE LENGTH=149;AT1G66410.1 | Symbols: CAM4, ACAM-4 | calmodulin 4 | chr1:24774431-24775785 REVERSE LENGTH=149;AT1G66410.2 | Symbols: CAM4 | calmodulin 4 | chr1:24774431-2
3	3	3	3	3	3	3	3	3		AT5G37720.2;AT5G37720.1	AT5G37720.2;AT5G37720.1	AT5G37720.2 | Symbols: ALY4 | ALWAYS EARLY 4 | chr5:14981805-14983978 REVERSE LENGTH=280;AT5G37720.1 | Symbols: ALY4 | ALWAYS EARLY 4 | chr5:14981805-14983978 REVERSE LENGTH=288
3	3	3	3	3	3	3	3	3		AT5G37600.1	AT5G37600.1;AT5G16570.1	AT5G37600.1 | Symbols: ATGSR1, GLN1;1, GSR 1, ATGLN1;1 | glutamine synthase clone R1 | chr5:14933574-14935656 REVERSE LENGTH=356
3	3	3	3	3	3	3	3	3		AT5G37510.1;AT5G37510.2	AT5G37510.1;AT5G37510.2	AT5G37510.1 | Symbols: EMB1467, CI76 | NADH-ubiquinone dehydrogenase, mitochondrial, putative | chr5:14897490-14900352 FORWARD LENGTH=745;AT5G37510.2 | Symbols: EMB1467, CI76 | NADH-ubiquinone dehydrogenase, mitochondrial, putative | chr5:14897490-14900447
3	3	3	3	3	3	3	3	3		AT5G36950.1	AT5G36950.1	AT5G36950.1 | Symbols: DegP10 | DegP protease 10 | chr5:14594992-14598216 FORWARD LENGTH=586
3	3	3	3	3	3	3	3	3		AT5G36880.1;AT5G36880.2	AT5G36880.1;AT5G36880.2	AT5G36880.1 | Symbols: ACS | acetyl-CoA synthetase | chr5:14534961-14539084 REVERSE LENGTH=693;AT5G36880.2 | Symbols: ACS | acetyl-CoA synthetase | chr5:14534961-14540296 REVERSE LENGTH=743
3	3	3	3	3	3	3	3	3		AT5G36230.1	AT5G36230.1	AT5G36230.1 | Symbols: | ARM repeat superfamily protein | chr5:14273519-14276773 FORWARD LENGTH=411
1	3	3	3	3	3	3	3	3		AT5G36170.3;AT5G36170.2;AT5G36170.1	AT5G36170.3;AT5G36170.2;AT5G36170.1	AT5G36170.3 | Symbols: HCF109, ATPRFB | high chlorophyll fluorescent 109 | chr5:14236297-14237974 REVERSE LENGTH=391;AT5G36170.2 | Symbols: HCF109, ATPRFB | high chlorophyll fluorescent 109 | chr5:14236083-14237974 REVERSE LENGTH=455;AT5G36170.1 | Symbols:
1	2	1	0	3	3	2	3	2		AT5G35980.1;AT5G35980.2	AT5G35980.1;AT5G35980.2	AT5G35980.1 | Symbols: YAK1 | yeast YAK1-related gene 1 | chr5:14128551-14135984 FORWARD LENGTH=956;AT5G35980.2 | Symbols: YAK1 | yeast YAK1-related gene 1 | chr5:14128551-14134354 FORWARD LENGTH=787
3	3	3	3	3	3	3	3	3		AT5G35970.1	AT5G35970.1	AT5G35970.1 | Symbols: | P-loop containing nucleoside triphosphate hydrolases superfamily protein | chr5:14119060-14123078 REVERSE LENGTH=961
3	3	3	3	3	3	3	3	3		AT5G35790.1	AT5G35790.1	AT5G35790.1 | Symbols: G6PD1 | glucose-6-phosphate dehydrogenase 1 | chr5:13956879-13959686 REVERSE LENGTH=576
3	3	3	3	3	3	3	3	3		AT5G35680.2;AT5G35680.1;AT2G04520.1;AT5G35680.3	AT5G35680.2;AT5G35680.1;AT2G04520.1;AT5G35680.3	AT5G35680.2 | Symbols: | Nucleic acid-binding, OB-fold-like protein | chr5:13858152-13858589 REVERSE LENGTH=145;AT5G35680.1 | Symbols: | Nucleic acid-binding, OB-fold-like protein | chr5:13858152-13858589 REVERSE LENGTH=145;AT2G04520.1 | Symbols: | Nucl
2	2	3	3	3	3	3	3	3		AT5G35660.1	AT5G35660.1	AT5G35660.1 | Symbols: | Glycine-rich protein family | chr5:13852609-13853717 REVERSE LENGTH=343
3	3	3	3	3	3	3	3	3		AT5G35630.3;AT5G35630.2;AT5G35630.1	AT5G35630.3;AT5G35630.2;AT5G35630.1	AT5G35630.3 | Symbols: GS2, GLN2, ATGSL1 | glutamine synthetase 2 | chr5:13831220-13833239 FORWARD LENGTH=430;AT5G35630.2 | Symbols: GS2, GLN2, ATGSL1 | glutamine synthetase 2 | chr5:13831220-13833239 FORWARD LENGTH=430;AT5G35630.1 | Symbols: GS2, GLN2, AT
3	3	3	3	3	3	3	3	3		AT5G35530.1	AT5G35530.1	AT5G35530.1 | Symbols: | Ribosomal protein S3 family protein | chr5:13710355-13712192 REVERSE LENGTH=248
3	3	3	3	3	3	3	3	3		AT5G35430.1	AT5G35430.1	AT5G35430.1 | Symbols: | Tetratricopeptide repeat (TPR)-like superfamily protein | chr5:13662077-13665735 FORWARD LENGTH=786
0	0	0	2	3	3	2	3	3		AT5G35410.1	AT5G35410.1	AT5G35410.1 | Symbols: SOS2, SNRK3.11, CIPK24, ATSOS2 | Protein kinase superfamily protein | chr5:13634933-13638062 FORWARD LENGTH=446
3	3	3	3	3	3	3	3	3		AT5G35180.2;AT5G35180.1;AT5G35180.4;AT5G35180.3	AT5G35180.2;AT5G35180.1;AT5G35180.4;AT5G35180.3	AT5G35180.2 | Symbols: | Protein of unknown function (DUF1336) | chr5:13424538-13432699 FORWARD LENGTH=778;AT5G35180.1 | Symbols: | Protein of unknown function (DUF1336) | chr5:13424538-13432787 FORWARD LENGTH=778;AT5G35180.4 | Symbols: | Protein of unk
3	3	3	3	3	3	3	3	3		AT5G34850.1	AT5G34850.1	AT5G34850.1 | Symbols: ATPAP26, PAP26 | purple acid phosphatase 26 | chr5:13108475-13111217 REVERSE LENGTH=475
3	3	3	3	3	3	3	3	3		AT5G30510.1	AT5G30510.1	AT5G30510.1 | Symbols: RPS1, ARRPS1 | ribosomal protein S1 | chr5:11619262-11621223 REVERSE LENGTH=416
3	3	3	3	3	3	3	3	3		AT5G28900.1;AT5G28850.2	AT5G28900.1;AT5G28850.2;AT5G28850.1	AT5G28900.1 | Symbols: | Calcium-binding EF-hand family protein | chr5:10925852-10929892 FORWARD LENGTH=536;AT5G28850.2 | Symbols: | Calcium-binding EF-hand family protein | chr5:10877360-10881278 REVERSE LENGTH=536
3	3	3	3	3	3	3	3	3		AT5G28840.2;AT5G28840.1	AT5G28840.2;AT5G28840.1	AT5G28840.2 | Symbols: GME | GDP-D-mannose 3,5-epimerase | chr5:10862472-10864024 REVERSE LENGTH=377;AT5G28840.1 | Symbols: GME | GDP-D-mannose 3,5-epimerase | chr5:10862472-10864024 REVERSE LENGTH=377
3	3	3	3	3	3	3	3	3		AT5G28740.1	AT5G28740.1	AT5G28740.1 | Symbols: | Tetratricopeptide repeat (TPR)-like superfamily protein | chr5:10780774-10783772 FORWARD LENGTH=917
3	3	3	3	3	3	3	3	3		AT5G28540.1	AT5G28540.1;AT1G09080.2;AT1G09080.1	AT5G28540.1 | Symbols: BIP1 | heat shock protein 70 (Hsp 70) family protein | chr5:10540665-10543274 REVERSE LENGTH=669
3	3	3	3	3	3	3	3	3		AT5G28460.1;AT5G28370.1;AT3G61520.1	AT5G28460.1;AT5G28370.1;AT3G61520.1	AT5G28460.1 | Symbols: | Pentatricopeptide repeat (PPR) superfamily protein | chr5:10374927-10377227 FORWARD LENGTH=766;AT5G28370.1 | Symbols: | Pentatricopeptide repeat (PPR) superfamily protein | chr5:10332375-10334558 REVERSE LENGTH=727;AT3G61520.1 |
3	3	3	3	3	3	3	3	3		AT5G28060.1	AT5G28060.1	AT5G28060.1 | Symbols: | Ribosomal protein S24e family protein | chr5:10069791-10070792 REVERSE LENGTH=133
3	2	3	3	3	3	3	3	3		AT5G28050.1;AT5G28050.2	AT5G28050.1;AT5G28050.2	AT5G28050.1 | Symbols: | Cytidine/deoxycytidylate deaminase family protein | chr5:10044209-10045755 REVERSE LENGTH=185;AT5G28050.2 | Symbols: | Cytidine/deoxycytidylate deaminase family protein | chr5:10044209-10045484 REVERSE LENGTH=204
0	0	1	0	0	1	0	3	3		AT5G28040.1	AT5G28040.1	AT5G28040.1 | Symbols: | DNA-binding storekeeper protein-related transcriptional regulator | chr5:10037654-10038937 REVERSE LENGTH=427
3	3	3	3	3	3	3	3	3		AT5G27970.1;AT5G27970.2	AT5G27970.1;AT5G27970.2	AT5G27970.1 | Symbols: | ARM repeat superfamily protein | chr5:10004720-10015429 FORWARD LENGTH=1630;AT5G27970.2 | Symbols: | ARM repeat superfamily protein | chr5:10004720-10015619 FORWARD LENGTH=1658
3	3	3	3	3	3	3	3	3		AT5G27850.1	AT5G27850.1	AT5G27850.1 | Symbols: | Ribosomal protein L18e/L15 superfamily protein | chr5:9873169-9874297 FORWARD LENGTH=187
3	3	2	2	1	1	1	2	1		AT5G27720.1	AT5G27720.1	AT5G27720.1 | Symbols: emb1644 | Small nuclear ribonucleoprotein family protein | chr5:9815904-9817304 FORWARD LENGTH=129
3	3	3	3	3	3	3	3	3		AT5G27700.1	AT5G27700.1	AT5G27700.1 | Symbols: | Ribosomal protein S21e | chr5:9807541-9808048 REVERSE LENGTH=82
3	3	3	3	3	3	3	3	3		AT5G27670.1	AT5G27670.1	AT5G27670.1 | Symbols: HTA7 | histone H2A 7 | chr5:9792807-9793365 REVERSE LENGTH=150
1	3	3	3	3	3	3	3	3		AT5G27650.1	AT5G27650.1	AT5G27650.1 | Symbols: | Tudor/PWWP/MBT superfamily protein | chr5:9785511-9789094 FORWARD LENGTH=1072
3	3	3	3	3	3	3	3	3		AT5G27640.1;AT5G27640.2	AT5G27640.1;AT5G27640.2	AT5G27640.1 | Symbols: TIF3B1, EIF3B, ATEIF3B-1, EIF3B-1, ATTIF3B1 | translation initiation factor 3B1 | chr5:9781207-9784759 REVERSE LENGTH=712;AT5G27640.2 | Symbols: TIF3B1, EIF3B, ATEIF3B-1, EIF3B-1, ATTIF3B1 | translation initiation factor 3B1 | chr5:9
3	3	3	3	3	3	3	3	3		AT5G27540.2;AT5G27540.1	AT5G27540.2;AT5G27540.1	AT5G27540.2 | Symbols: MIRO1 | MIRO-related GTP-ase 1 | chr5:9722816-9727112 FORWARD LENGTH=648;AT5G27540.1 | Symbols: MIRO1, emb2473 | MIRO-related GTP-ase 1 | chr5:9722816-9727112 FORWARD LENGTH=648
3	3	3	3	3	3	3	3	3		AT5G27410.1;AT5G27410.2	AT5G27410.1;AT5G27410.2	AT5G27410.1 | Symbols: | D-aminoacid aminotransferase-like PLP-dependent enzymes superfamily protein | chr5:9678821-9682468 FORWARD LENGTH=559;AT5G27410.2 | Symbols: | D-aminoacid aminotransferase-like PLP-dependent enzymes superfamily protein | chr5:967
3	3	3	3	3	3	3	3	3		AT5G27390.1	AT5G27390.1	AT5G27390.1 | Symbols: | Mog1/PsbP/DUF1795-like photosystem II reaction center PsbP family protein | chr5:9674634-9676118 REVERSE LENGTH=241
2	3	3	3	3	3	3	3	3		AT5G27380.1	AT5G27380.1	AT5G27380.1 | Symbols: GSH2, GSHB | glutathione synthetase 2 | chr5:9668211-9670912 REVERSE LENGTH=539
3	3	3	3	3	3	3	3	3		AT5G27120.1	AT5G27120.1	AT5G27120.1 | Symbols: | NOP56-like pre RNA processing ribonucleoprotein | chr5:9541287-9543684 FORWARD LENGTH=533
3	3	3	3	3	3	3	3	3		AT5G27030.1;AT5G27030.2	AT5G27030.1;AT5G27030.2	AT5G27030.1 | Symbols: TPR3 | TOPLESS-related 3 | chr5:9508913-9515263 REVERSE LENGTH=1108;AT5G27030.2 | Symbols: TPR3 | TOPLESS-related 3 | chr5:9508913-9515263 REVERSE LENGTH=1134
3	3	3	3	3	3	3	3	3		AT5G26860.1	AT5G26860.1;AT3G05780.1;AT3G05790.1	AT5G26860.1 | Symbols: LON_ARA_ARA, LON1 | lon protease 1 | chr5:9451183-9456631 FORWARD LENGTH=940
3	3	3	3	3	3	3	3	3		AT5G26830.1	AT5G26830.1	AT5G26830.1 | Symbols: | Threonyl-tRNA synthetase | chr5:9437351-9441568 FORWARD LENGTH=709
3	3	3	3	3	3	3	3	3		AT5G26780.1;AT5G26780.3;AT5G26780.2	AT5G26780.1;AT5G26780.3;AT5G26780.2	AT5G26780.1 | Symbols: SHM2 | serine hydroxymethyltransferase 2 | chr5:9418299-9421725 FORWARD LENGTH=517;AT5G26780.3 | Symbols: SHM2 | serine hydroxymethyltransferase 2 | chr5:9418299-9421725 FORWARD LENGTH=533;AT5G26780.2 | Symbols: SHM2 | serine hydroxy
3	3	3	3	3	3	3	3	3		AT5G26742.2;AT5G26742.1;AT5G26742.3	AT5G26742.2;AT5G26742.1;AT5G26742.3	AT5G26742.2 | Symbols: emb1138 | DEAD box RNA helicase (RH3) | chr5:9285540-9288871 REVERSE LENGTH=748;AT5G26742.1 | Symbols: emb1138 | DEAD box RNA helicase (RH3) | chr5:9285540-9288871 REVERSE LENGTH=747;AT5G26742.3 | Symbols: emb1138 | DEAD box RNA heli
3	3	3	3	3	3	3	3	3		AT5G26710.1	AT5G26710.1	AT5G26710.1 | Symbols: | Glutamyl/glutaminyl-tRNA synthetase, class Ic | chr5:9305673-9308247 FORWARD LENGTH=719
3	3	3	3	3	3	3	3	3		AT5G26570.1;AT5G26570.2	AT5G26570.1;AT5G26570.2	AT5G26570.1 | Symbols: PWD, OK1, ATGWD3 | catalytics;carbohydrate kinases;phosphoglucan, water dikinases | chr5:9261580-9267526 FORWARD LENGTH=1196;AT5G26570.2 | Symbols: PWD, OK1, ATGWD3 | catalytics;carbohydrate kinases;phosphoglucan, water dikinases | c
2	3	3	3	3	3	3	3	3		AT5G26360.1	AT5G26360.1	AT5G26360.1 | Symbols: | TCP-1/cpn60 chaperonin family protein | chr5:9255561-9258891 REVERSE LENGTH=555
3	3	3	3	3	3	3	3	3		AT5G26340.1	AT5G26340.1	AT5G26340.1 | Symbols: MSS1, STP13, ATSTP13 | Major facilitator superfamily protein | chr5:9243851-9246994 REVERSE LENGTH=526
3	3	3	3	3	3	3	3	3		AT5G26280.1;AT5G26280.2	AT5G26280.1;AT5G26280.2;AT2G04170.4;AT2G04170.3;AT2G04170.5;AT2G04170.2;AT2G04170.1;AT2G04190.1	AT5G26280.1 | Symbols: | TRAF-like family protein | chr5:9208724-9210403 FORWARD LENGTH=350;AT5G26280.2 | Symbols: | TRAF-like family protein | chr5:9208724-9210403 FORWARD LENGTH=327
3	3	3	3	3	3	3	3	3		AT5G26260.1	AT5G26260.1;AT5G26320.1;AT5G26290.1	AT5G26260.1 | Symbols: | TRAF-like family protein | chr5:9200492-9202153 FORWARD LENGTH=351
3	3	3	3	3	3	3	3	3		AT5G26210.1	AT5G26210.1;AT5G20510.1	AT5G26210.1 | Symbols: AL4 | alfin-like 4 | chr5:9158566-9160221 REVERSE LENGTH=255
3	3	3	3	3	3	3	3	3		AT5G26180.2;AT5G26180.1	AT5G26180.2;AT5G26180.1	AT5G26180.2 | Symbols: | S-adenosyl-L-methionine-dependent methyltransferases superfamily protein | chr5:9149253-9152595 FORWARD LENGTH=567;AT5G26180.1 | Symbols: | S-adenosyl-L-methionine-dependent methyltransferases superfamily protein | chr5:9149253-9
3	3	3	3	3	3	3	3	3		AT5G26120.1	AT5G26120.1	AT5G26120.1 | Symbols: ATASD2, ASD2 | alpha-L-arabinofuranosidase 2 | chr5:9121835-9125399 REVERSE LENGTH=674
3	3	3	3	3	3	3	3	3		AT5G25757.1;AT5G25754.1	AT5G25757.1;AT5G25754.1	AT5G25757.1 | Symbols: | RNA polymerase I-associated factor PAF67 | chr5:8965515-8967460 REVERSE LENGTH=514;AT5G25754.1 | Symbols: | RNA polymerase I-associated factor PAF67 | chr5:8953564-8955511 FORWARD LENGTH=514
3	3	3	3	3	3	3	3	3		AT5G25460.1	AT5G25460.1	AT5G25460.1 | Symbols: | Protein of unknown function, DUF642 | chr5:8863430-8865394 FORWARD LENGTH=369
3	3	3	3	3	3	3	3	3		AT5G25265.1	AT5G25265.1	AT5G25265.1 | Symbols: | unknown protein;FUNCTIONS IN: molecular_function unknown;INVOLVED IN: biological_process unknown;LOCATED IN: plasma membrane, membrane;EXPRESSED IN: cultured cell, leaf;BEST Arabidopsis thaliana protein match is: unknown prot
3	3	3	3	3	3	3	3	3		AT5G25060.1	AT5G25060.1;AT5G10800.1	AT5G25060.1 | Symbols: | RNA recognition motif (RRM)-containing protein | chr5:8634219-8639984 REVERSE LENGTH=946
2	3	3	3	3	3	3	3	3		AT5G24850.1	AT5G24850.1	AT5G24850.1 | Symbols: CRY3 | cryptochrome 3 | chr5:8535399-8538016 REVERSE LENGTH=526
3	3	3	3	3	3	3	3	3		AT5G24710.1	AT5G24710.1	AT5G24710.1 | Symbols: | Transducin/WD40 repeat-like superfamily protein | chr5:8459148-8467920 REVERSE LENGTH=1377
3	3	3	3	3	3	3	3	3		AT5G24690.1	AT5G24690.1	AT5G24690.1 | Symbols: | Protein of unknown function (DUF3411) | chr5:8455783-8458513 REVERSE LENGTH=521
3	3	3	3	3	3	3	3	3		AT5G24650.1	AT5G24650.1	AT5G24650.1 | Symbols: | Mitochondrial import inner membrane translocase subunit Tim17/Tim22/Tim23 family protein | chr5:8437123-8438859 FORWARD LENGTH=259
3	3	3	3	3	3	3	3	3		AT5G24490.1	AT5G24490.1	AT5G24490.1 | Symbols: | 30S ribosomal protein, putative | chr5:8365690-8367178 FORWARD LENGTH=308
2	3	3	3	3	3	3	3	3		AT5G24300.2;AT5G24300.1	AT5G24300.2;AT5G24300.1	AT5G24300.2 | Symbols: SSI1 | Glycogen/starch synthases, ADP-glucose type | chr5:8266934-8270860 FORWARD LENGTH=652;AT5G24300.1 | Symbols: SSI1, SSI, ATSS1 | Glycogen/starch synthases, ADP-glucose type | chr5:8266934-8270860 FORWARD LENGTH=652
3	3	3	3	3	3	3	3	3		AT5G23900.1	AT5G23900.1;AT3G48960.1	AT5G23900.1 | Symbols: | Ribosomal protein L13e family protein | chr5:8064176-8065081 REVERSE LENGTH=206
3	3	3	3	3	3	3	3	3		AT5G23860.2;AT5G23860.1	AT5G23860.2;AT5G23860.1	AT5G23860.2 | Symbols: TUB8 | tubulin beta 8 | chr5:8042962-8044528 FORWARD LENGTH=449;AT5G23860.1 | Symbols: TUB8 | tubulin beta 8 | chr5:8042962-8044528 FORWARD LENGTH=449
3	3	3	3	3	3	3	3	3		AT5G23740.1	AT5G23740.1	AT5G23740.1 | Symbols: RPS11-BETA | ribosomal protein S11-beta | chr5:8008251-8009330 REVERSE LENGTH=159
3	3	3	3	3	3	3	3	3		AT5G23540.1;AT5G23540.2	AT5G23540.1;AT5G23540.2	AT5G23540.1 | Symbols: | Mov34/MPN/PAD-1 family protein | chr5:7937772-7939339 FORWARD LENGTH=308;AT5G23540.2 | Symbols: | Mov34/MPN/PAD-1 family protein | chr5:7938109-7939339 FORWARD LENGTH=259
3	3	3	3	3	3	3	3	3		AT5G23140.1	AT5G23140.1	AT5G23140.1 | Symbols: CLPP2, NCLPP7 | nuclear-encoded CLP protease P7 | chr5:7783811-7784826 FORWARD LENGTH=241
3	3	3	3	3	3	3	3	3		AT5G23120.1	AT5G23120.1	AT5G23120.1 | Symbols: HCF136 | photosystem II stability/assembly factor, chloroplast (HCF136) | chr5:7778154-7780463 FORWARD LENGTH=403
3	3	2	3	3	3	3	3	3		AT5G23110.1	AT5G23110.1	AT5G23110.1 | Symbols: | Zinc finger, C3HC4 type (RING finger) family protein | chr5:7758307-7775509 FORWARD LENGTH=4706
3	3	3	3	3	3	3	3	3		AT5G23060.1	AT5G23060.1	AT5G23060.1 | Symbols: CaS | calcium sensing receptor | chr5:7736760-7738412 REVERSE LENGTH=387
3	3	3	3	3	3	3	3	3		AT5G22880.1	AT5G22880.1	AT5G22880.1 | Symbols: H2B, HTB2 | histone B2 | chr5:7652130-7652567 REVERSE LENGTH=145
3	3	3	3	3	3	3	3	3		AT5G22800.1	AT5G22800.1	AT5G22800.1 | Symbols: EMB86, EMB1030, EMB263 | Alanyl-tRNA synthetase, class IIc | chr5:7616221-7619961 REVERSE LENGTH=978
3	3	3	3	3	3	3	3	3		AT5G22780.1	AT5G22780.1	AT5G22780.1 | Symbols: | Adaptor protein complex AP-2, alpha subunit | chr5:7590100-7597828 REVERSE LENGTH=1013
3	3	3	3	3	3	3	3	3		AT5G22650.2;AT5G22650.1	AT5G22650.2;AT5G22650.1	AT5G22650.2 | Symbols: HD2B, HDT02, HDT2, ATHD2B, HDA4, HD2 | histone deacetylase 2B | chr5:7534120-7536054 FORWARD LENGTH=305;AT5G22650.1 | Symbols: HD2B, HDT02, HDT2, ATHD2B, HDA4, HD2, ATHD2 | histone deacetylase 2B | chr5:7534120-7536054 FORWARD LENGTH
3	3	3	3	3	3	3	3	2		AT5G22640.1;AT5G22640.2	AT5G22640.1;AT5G22640.2	AT5G22640.1 | Symbols: emb1211 | MORN (Membrane Occupation and Recognition Nexus) repeat-containing protein | chr5:7529423-7533641 FORWARD LENGTH=871;AT5G22640.2 | Symbols: emb1211 | MORN (Membrane Occupation and Recognition Nexus) repeat-containing protei
3	3	3	3	3	3	3	3	3		AT5G22470.1	AT5G22470.1	AT5G22470.1 | Symbols: | NAD+ ADP-ribosyltransferases;NAD+ ADP-ribosyltransferases | chr5:7447045-7450743 FORWARD LENGTH=814
3	3	2	3	3	3	3	3	2		AT5G22360.1	AT5G22360.1	AT5G22360.1 | Symbols: ATVAMP714, VAMP714 | vesicle-associated membrane protein 714 | chr5:7404379-7405654 REVERSE LENGTH=221
3	3	3	2	3	3	3	3	3		AT5G22350.1	AT5G22350.1	AT5G22350.1 | Symbols: ELM1 | Protein of unknown function (DUF1022) | chr5:7397762-7400746 REVERSE LENGTH=427
0	2	2	3	2	3	3	3	3		AT5G22330.1	AT5G22330.1	AT5G22330.1 | Symbols: ATTIP49A, RIN1 | P-loop containing nucleoside triphosphate hydrolases superfamily protein | chr5:7391026-7394071 REVERSE LENGTH=458
3	3	3	3	3	3	3	3	3		AT5G22060.1	AT5G22060.1	AT5G22060.1 | Symbols: ATJ2, J2 | DNAJ homologue 2 | chr5:7303798-7305668 REVERSE LENGTH=419
3	3	3	3	3	3	3	3	3		AT5G22040.3;AT5G22040.2;AT5G22040.1	AT5G22040.3;AT5G22040.2;AT5G22040.1	AT5G22040.3 | Symbols: | unknown protein;FUNCTIONS IN: molecular_function unknown;INVOLVED IN: biological_process unknown;LOCATED IN: cellular_component unknown. | chr5:7297154-7298363 REVERSE LENGTH=284;AT5G22040.2 | Symbols: | unknown protein;FUNCT
3	3	3	3	3	3	3	3	3		AT5G22030.2;AT5G22030.1	AT5G22030.2;AT5G22030.1	AT5G22030.2 | Symbols: UBP8 | ubiquitin-specific protease 8 | chr5:7290155-7296344 REVERSE LENGTH=913;AT5G22030.1 | Symbols: UBP8 | ubiquitin-specific protease 8 | chr5:7290155-7296344 REVERSE LENGTH=913
3	3	3	3	3	3	3	3	3		AT5G22010.1	AT5G22010.1	AT5G22010.1 | Symbols: AtRFC1, RFC1 | replication factor C1 | chr5:7280632-7287037 REVERSE LENGTH=956
0	0	0	2	1	3	0	2	3		AT5G21990.1	AT5G21990.1	AT5G21990.1 | Symbols: TPR7 | Tetratricopeptide repeat (TPR)-like superfamily protein | chr5:7273395-7276318 FORWARD LENGTH=554
2	3	3	3	3	3	2	3	3		AT5G21930.3;AT5G21930.2;AT5G21930.1	AT5G21930.3;AT5G21930.2;AT5G21930.1	AT5G21930.3 | Symbols: PAA2 | P-type ATPase of Arabidopsis 2 | chr5:7243129-7248721 FORWARD LENGTH=860;AT5G21930.2 | Symbols: PAA2, HMA8 | P-type ATPase of Arabidopsis 2 | chr5:7243129-7248721 FORWARD LENGTH=883;AT5G21930.1 | Symbols: PAA2, HMA8, ATHMA8 |
3	3	3	3	3	3	3	3	3		AT5G21326.1	AT5G21326.1;AT5G21222.1;AT2G26980.2;AT2G26980.1;AT2G26980.5;AT2G26980.3;AT2G26980.4	AT5G21326.1 | Symbols: | Ca2+regulated serine-threonine protein kinase family protein | chr5:7218081-7221743 FORWARD LENGTH=439
3	3	3	3	3	3	3	3	3		AT5G21274.1;AT3G56800.1;AT3G43810.1;AT2G41110.1;AT2G27030.1;AT2G27030.3;AT2G41110.2;AT2G27030.2	AT5G21274.1;AT3G56800.1;AT3G43810.1;AT2G41110.1;AT2G27030.1;AT2G27030.3;AT2G41110.2;AT2G27030.2	AT5G21274.1 | Symbols: CAM6, ACAM-6 | calmodulin 6 | chr5:7214740-7215950 REVERSE LENGTH=149;AT3G56800.1 | Symbols: CAM3, acam-3 | calmodulin 3 | chr3:21034981-21035920 REVERSE LENGTH=149;AT3G43810.1 | Symbols: CAM7 | calmodulin 7 | chr3:15664619-15666355
3	3	3	3	3	3	3	3	3		AT5G21160.1;AT5G21160.2;AT5G21160.3	AT5G21160.1;AT5G21160.2;AT5G21160.3	AT5G21160.1 | Symbols: | LA RNA-binding protein | chr5:7199191-7203879 REVERSE LENGTH=826;AT5G21160.2 | Symbols: | LA RNA-binding protein | chr5:7198817-7203879 REVERSE LENGTH=832;AT5G21160.3 | Symbols: | LA RNA-binding protein | chr5:7198817-7203879 RE
3	3	3	3	3	3	3	3	3		AT5G20950.2;AT5G20950.1	AT5G20950.2;AT5G20950.1;AT3G47050.2;AT3G47000.1;AT3G47050.1	AT5G20950.2 | Symbols: | Glycosyl hydrolase family protein | chr5:7107609-7110775 REVERSE LENGTH=624;AT5G20950.1 | Symbols: | Glycosyl hydrolase family protein | chr5:7107609-7110775 REVERSE LENGTH=624
1	0	3	0	1	3	1	1	3		AT5G20930.1	AT5G20930.1	AT5G20930.1 | Symbols: TSL | Protein kinase superfamily protein | chr5:7098213-7102970 FORWARD LENGTH=688
3	3	3	3	3	3	3	3	3		AT5G20920.2;AT5G20920.3;AT5G20920.1	AT5G20920.2;AT5G20920.3;AT5G20920.1	AT5G20920.2 | Symbols: EIF2 BETA | eukaryotic translation initiation factor 2 beta subunit | chr5:7094994-7096661 REVERSE LENGTH=267;AT5G20920.3 | Symbols: EIF2 BETA | eukaryotic translation initiation factor 2 beta subunit | chr5:7094994-7096661 REVERSE L
3	3	3	3	3	3	3	3	3		AT5G20890.1	AT5G20890.1	AT5G20890.1 | Symbols: | TCP-1/cpn60 chaperonin family protein | chr5:7087020-7089906 REVERSE LENGTH=527
3	3	3	3	3	3	3	3	3		AT5G20630.1	AT5G20630.1	AT5G20630.1 | Symbols: GLP3, GLP3A, GLP3B, ATGER3, GER3 | germin 3 | chr5:6975315-6975950 REVERSE LENGTH=211
3	3	3	3	3	3	3	3	3		AT5G20600.1	AT5G20600.1	AT5G20600.1 | Symbols: | FUNCTIONS IN: molecular_function unknown;INVOLVED IN: rRNA processing;LOCATED IN: preribosome, small subunit precursor;EXPRESSED IN: 22 plant structures;EXPRESSED DURING: 13 growth stages;CONTAINS InterPro DOMAIN/s: Nucleolar
3	3	3	3	3	3	3	3	3		AT5G20490.1;AT5G20490.2	AT5G20490.1;AT5G20490.2;AT5G20470.1	AT5G20490.1 | Symbols: XIK, ATXIK, XI-17 | Myosin family protein with Dil domain | chr5:6927064-6936825 REVERSE LENGTH=1545;AT5G20490.2 | Symbols: XIK, ATXIK, XI-17 | Myosin family protein with Dil domain | chr5:6927064-6936079 REVERSE LENGTH=1465
3	3	3	3	3	3	3	3	3		AT5G20290.1	AT5G20290.1;AT5G59240.1	AT5G20290.1 | Symbols: | Ribosomal protein S8e family protein | chr5:6851695-6853012 REVERSE LENGTH=222
3	3	3	3	3	3	3	3	3		AT5G20280.1	AT5G20280.1;AT1G04920.1	AT5G20280.1 | Symbols: ATSPS1F, SPS1F | sucrose phosphate synthase 1F | chr5:6844994-6849997 REVERSE LENGTH=1043
3	3	3	3	3	3	3	3	3		AT5G20250.4;AT5G20250.3;AT5G20250.2;AT5G20250.1	AT5G20250.4;AT5G20250.3;AT5G20250.2;AT5G20250.1	AT5G20250.4 | Symbols: DIN10 | Raffinose synthase family protein | chr5:6833730-6836635 FORWARD LENGTH=844;AT5G20250.3 | Symbols: DIN10 | Raffinose synthase family protein | chr5:6834207-6836635 FORWARD LENGTH=749;AT5G20250.2 | Symbols: DIN10 | Raffinose s
3	3	3	3	3	3	3	3	2		AT5G20090.2;AT5G20090.1;AT5G20090.3	AT5G20090.2;AT5G20090.1;AT5G20090.3	AT5G20090.2 | Symbols: | Uncharacterised protein family (UPF0041) | chr5:6787246-6788000 REVERSE LENGTH=110;AT5G20090.1 | Symbols: | Uncharacterised protein family (UPF0041) | chr5:6787246-6788000 REVERSE LENGTH=110;AT5G20090.3 | Symbols: | Uncharacteri
3	3	3	3	3	3	3	3	3		AT5G20010.1;AT5G55190.1;AT5G20020.1	AT5G20010.1;AT5G55190.1;AT5G20020.1	AT5G20010.1 | Symbols: RAN-1, RAN1, ATRAN1 | RAS-related nuclear protein-1 | chr5:6760364-6761747 FORWARD LENGTH=221;AT5G55190.1 | Symbols: RAN3, ATRAN3 | RAN GTPase 3 | chr5:22392285-22393957 FORWARD LENGTH=221;AT5G20020.1 | Symbols: RAN2 | RAS-related GT
3	3	3	3	3	3	3	3	3		AT5G19990.1	AT5G19990.1	AT5G19990.1 | Symbols: RPT6A, ATSUG1 | regulatory particle triple-A ATPase 6A | chr5:6752144-6754918 FORWARD LENGTH=419
3	3	3	3	3	3	3	3	3		AT5G19960.1	AT5G19960.1	AT5G19960.1 | Symbols: | RNA-binding (RRM/RBD/RNP motifs) family protein | chr5:6744029-6746133 FORWARD LENGTH=337
3	3	3	3	3	3	3	3	3		AT5G19950.3;AT5G19950.2;AT5G19950.1	AT5G19950.3;AT5G19950.2;AT5G19950.1	AT5G19950.3 | Symbols: | Domain of unknown function (DUF1767) | chr5:6741163-6743702 REVERSE LENGTH=441;AT5G19950.2 | Symbols: | Domain of unknown function (DUF1767) | chr5:6741163-6743702 REVERSE LENGTH=443;AT5G19950.1 | Symbols: | Domain of unknown fu
3	3	3	3	3	3	3	3	3		AT5G19940.2;AT5G19940.1	AT5G19940.2;AT5G19940.1	AT5G19940.2 | Symbols: | Plastid-lipid associated protein PAP / fibrillin family protein | chr5:6739693-6740747 FORWARD LENGTH=235;AT5G19940.1 | Symbols: | Plastid-lipid associated protein PAP / fibrillin family protein | chr5:6739693-6740661 FORWARD LEN
3	3	3	3	3	3	3	3	3		AT5G19820.1	AT5G19820.1	AT5G19820.1 | Symbols: emb2734 | ARM repeat superfamily protein | chr5:6695731-6701247 REVERSE LENGTH=1116
3	3	3	3	3	3	3	3	3		AT5G19780.1;AT5G19770.1	AT5G19780.1;AT5G19770.1	AT5G19780.1 | Symbols: TUA5 | tubulin alpha-5 | chr5:6687212-6688926 FORWARD LENGTH=450;AT5G19770.1 | Symbols: TUA3 | tubulin alpha-3 | chr5:6682761-6684474 REVERSE LENGTH=450
3	3	3	3	3	3	3	3	3		AT5G19760.1	AT5G19760.1	AT5G19760.1 | Symbols: | Mitochondrial substrate carrier family protein | chr5:6679591-6681845 REVERSE LENGTH=298
3	3	3	3	3	3	3	3	3		AT5G19690.1	AT5G19690.1	AT5G19690.1 | Symbols: STT3A | staurosporin and temperature sensitive 3-like A | chr5:6652649-6658214 FORWARD LENGTH=779
3	3	3	3	3	3	3	3	3		AT5G19620.1	AT5G19620.1	AT5G19620.1 | Symbols: EMB213, OEP80, ATOEP80, TOC75 | outer envelope protein of 80 kDa | chr5:6623323-6627641 FORWARD LENGTH=732
3	3	3	3	3	3	3	3	3		AT5G19550.1	AT5G19550.1;AT1G62800.1;AT1G62800.2	AT5G19550.1 | Symbols: ASP2, AAT2 | aspartate aminotransferase 2 | chr5:6598201-6601597 FORWARD LENGTH=405
3	3	3	3	3	3	3	3	3		AT5G19510.1	AT5G19510.1	AT5G19510.1 | Symbols: | Translation elongation factor EF1B/ribosomal protein S6 family protein | chr5:6581854-6583137 REVERSE LENGTH=224
3	3	3	3	3	3	3	3	3		AT5G19485.1	AT5G19485.1	AT5G19485.1 | Symbols: | transferases;nucleotidyltransferases | chr5:6573907-6576352 REVERSE LENGTH=456
3	3	3	3	3	3	3	3	3		AT5G19370.1	AT5G19370.1	AT5G19370.1 | Symbols: | rhodanese-like domain-containing protein / PPIC-type PPIASE domain-containing protein | chr5:6524247-6526629 REVERSE LENGTH=299
1	3	3	3	3	3	3	3	3		AT5G19350.2;AT5G19350.1	AT5G19350.2;AT5G19350.1	AT5G19350.2 | Symbols: | RNA-binding (RRM/RBD/RNP motifs) family protein | chr5:6518978-6521295 FORWARD LENGTH=421;AT5G19350.1 | Symbols: | RNA-binding (RRM/RBD/RNP motifs) family protein | chr5:6518978-6521295 FORWARD LENGTH=425
3	3	3	3	3	3	3	3	3		AT5G19300.1	AT5G19300.1	AT5G19300.1 | Symbols: | CONTAINS InterPro DOMAIN/s: Nucleic acid-binding, OB-fold-like (InterPro:IPR016027), Protein of unknown function DUF171 (InterPro:IPR003750);Has 3649 Blast hits to 1964 proteins in 291 species: Archae - 113;Bacteria - 121;Metaz
3	3	3	3	3	3	3	3	3		AT5G19220.1	AT5G19220.1;AT1G27680.1;AT4G39210.1;AT2G21590.2;AT2G21590.1	AT5G19220.1 | Symbols: ADG2, APL1 | ADP glucose pyrophosphorylase large subunit 1 | chr5:6463931-6466775 REVERSE LENGTH=522
3	3	3	3	3	3	3	3	3		AT5G18960.1	AT5G18960.1	AT5G18960.1 | Symbols: FRS12 | FAR1-related sequence 12 | chr5:6330556-6333071 FORWARD LENGTH=788
3	3	3	3	3	3	3	3	3		AT5G18660.1	AT5G18660.1	AT5G18660.1 | Symbols: PCB2 | NAD(P)-binding Rossmann-fold superfamily protein | chr5:6220872-6222125 REVERSE LENGTH=417
3	3	3	3	3	3	3	3	3		AT5G18620.1;AT5G18620.2	AT5G18620.1;AT5G18620.2	AT5G18620.1 | Symbols: CHR17 | chromatin remodeling factor17 | chr5:6196190-6202058 REVERSE LENGTH=1069;AT5G18620.2 | Symbols: CHR17 | chromatin remodeling factor17 | chr5:6196190-6202058 REVERSE LENGTH=1072
3	2	3	3	3	3	3	3	3		AT5G18400.1;AT5G18400.3;AT5G18400.2	AT5G18400.1;AT5G18400.3;AT5G18400.2	AT5G18400.1 | Symbols: | Cytokine-induced anti-apoptosis inhibitor 1, Fe-S biogenesis | chr5:6092955-6094566 REVERSE LENGTH=269;AT5G18400.3 | Symbols: | Cytokine-induced anti-apoptosis inhibitor 1, Fe-S biogenesis | chr5:6092955-6094876 REVERSE LENGTH=27
3	3	3	3	3	3	3	3	3		AT5G18380.2;AT5G18380.1;AT5G18380.3	AT5G18380.2;AT5G18380.1;AT5G18380.3	AT5G18380.2 | Symbols: | Ribosomal protein S5 domain 2-like superfamily protein | chr5:6090128-6090693 REVERSE LENGTH=144;AT5G18380.1 | Symbols: | Ribosomal protein S5 domain 2-like superfamily protein | chr5:6090253-6090693 REVERSE LENGTH=146;AT5G18380.
3	3	3	2	3	3	3	3	3		AT5G17990.1	AT5G17990.1	AT5G17990.1 | Symbols: TRP1, pat1 | tryptophan biosynthesis 1 | chr5:5957330-5959681 FORWARD LENGTH=444
3	3	3	3	3	3	3	3	3		AT5G17920.2;AT5G17920.1	AT5G17920.2;AT5G17920.1;AT2G43800.1	AT5G17920.2 | Symbols: ATCIMS | Cobalamin-independent synthase family protein | chr5:5935771-5939195 FORWARD LENGTH=765;AT5G17920.1 | Symbols: ATCIMS, ATMETS, ATMS1 | Cobalamin-independent synthase family protein | chr5:5935771-5939195 FORWARD LENGTH=765
0	1	0	1	3	3	3	3	3		AT5G17900.1;AT4G08580.1	AT5G17900.1;AT4G08580.1	AT5G17900.1 | Symbols: | microfibrillar-associated protein-related | chr5:5925144-5926690 FORWARD LENGTH=435;AT4G08580.1 | Symbols: | microfibrillar-associated protein-related | chr4:5462190-5463718 FORWARD LENGTH=435
2	3	3	3	3	3	3	3	3		AT5G17870.1	AT5G17870.1	AT5G17870.1 | Symbols: PSRP6 | plastid-specific 50S ribosomal protein 6 | chr5:5907817-5908137 FORWARD LENGTH=106
3	3	3	3	3	3	3	3	3		AT5G17820.1	AT5G17820.1	AT5G17820.1 | Symbols: | Peroxidase superfamily protein | chr5:5888195-5890101 REVERSE LENGTH=313
3	3	3	3	3	3	3	3	3		AT5G17770.1	AT5G17770.1	AT5G17770.1 | Symbols: ATCBR, CBR1, CBR | NADH:cytochrome B5 reductase 1 | chr5:5864543-5866495 REVERSE LENGTH=281
3	3	3	3	3	3	3	3	3		AT5G17380.1	AT5G17380.1	AT5G17380.1 | Symbols: | Thiamine pyrophosphate dependent pyruvate decarboxylase family protein | chr5:5724920-5726720 REVERSE LENGTH=572
3	3	3	3	3	3	3	3	3		AT5G17330.1;AT2G02010.1	AT5G17330.1;AT2G02010.1;AT2G02000.1;AT3G17720.1	AT5G17330.1 | Symbols: GAD, GAD1 | glutamate decarboxylase | chr5:5711141-5714839 FORWARD LENGTH=502;AT2G02010.1 | Symbols: GAD4 | glutamate decarboxylase 4 | chr2:474375-476495 REVERSE LENGTH=493
3	3	3	3	3	3	3	3	3		AT5G17310.2;AT5G17310.1	AT5G17310.2;AT5G17310.1	AT5G17310.2 | Symbols: UGP2 | UDP-glucose pyrophosphorylase 2 | chr5:5696955-5700845 REVERSE LENGTH=470;AT5G17310.1 | Symbols: UGP2, AtUGP2 | UDP-glucose pyrophosphorylase 2 | chr5:5696955-5699671 REVERSE LENGTH=390
3	3	3	3	3	3	3	3	3		AT5G17170.1;AT5G17170.2	AT5G17170.1;AT5G17170.2	AT5G17170.1 | Symbols: ENH1 | rubredoxin family protein | chr5:5649335-5650975 FORWARD LENGTH=271;AT5G17170.2 | Symbols: ENH1 | rubredoxin family protein | chr5:5649335-5650835 FORWARD LENGTH=224
1	3	3	1	3	3	3	3	3		AT5G17050.1	AT5G17050.1;AT5G17040.1	AT5G17050.1 | Symbols: UGT78D2 | UDP-glucosyl transferase 78D2 | chr5:5607828-5609392 REVERSE LENGTH=460
3	3	3	3	3	3	3	3	3		AT5G17020.2;AT5G17020.1	AT5G17020.2;AT5G17020.1	AT5G17020.2 | Symbols: XPO1A | exportin 1A | chr5:5594904-5602467 FORWARD LENGTH=1060;AT5G17020.1 | Symbols: XPO1A, ATCRM1, ATXPO1, XPO1, HIT2 | exportin 1A | chr5:5594904-5602467 FORWARD LENGTH=1075
3	3	3	3	3	3	3	3	3		AT5G16970.1	AT5G16970.1;AT5G16980.1;AT5G16980.2;AT5G16960.1;AT1G26320.2;AT3G03080.1;AT1G65560.1;AT1G26320.1	AT5G16970.1 | Symbols: AT-AER, AER | alkenal reductase | chr5:5576291-5578001 REVERSE LENGTH=345
2	2	3	3	3	3	2	3	3		AT5G16840.3;AT5G16840.1;AT5G16840.2	AT5G16840.3;AT5G16840.1;AT5G16840.2;AT4G17720.1	AT5G16840.3 | Symbols: BPA1 | binding partner of acd11 1 | chr5:5536042-5538026 FORWARD LENGTH=257;AT5G16840.1 | Symbols: BPA1 | binding partner of acd11 1 | chr5:5536042-5538026 FORWARD LENGTH=259;AT5G16840.2 | Symbols: BPA1 | binding partner of acd11 1 |
3	3	3	3	3	3	3	3	3		AT5G16750.1	AT5G16750.1	AT5G16750.1 | Symbols: TOZ | Transducin family protein / WD-40 repeat family protein | chr5:5504541-5509266 REVERSE LENGTH=876
3	3	3	3	3	3	3	3	3		AT5G16715.1	AT5G16715.1	AT5G16715.1 | Symbols: EMB2247 | ATP binding;valine-tRNA ligases;aminoacyl-tRNA ligases;nucleotide binding;ATP binding;aminoacyl-tRNA ligases | chr5:5485353-5493229 FORWARD LENGTH=974
0	0	0	0	0	3	0	1	3		AT5G16680.1	AT5G16680.1	AT5G16680.1 | Symbols: | RING/FYVE/PHD zinc finger superfamily protein | chr5:5467534-5472956 REVERSE LENGTH=1311
3	3	3	3	3	3	3	2	2		AT5G16590.1	AT5G16590.1	AT5G16590.1 | Symbols: LRR1 | Leucine-rich repeat protein kinase family protein | chr5:5431862-5433921 FORWARD LENGTH=625
3	3	3	3	3	3	3	3	3		AT5G16440.1	AT5G16440.1	AT5G16440.1 | Symbols: IPP1 | isopentenyl diphosphate isomerase 1 | chr5:5371765-5373575 FORWARD LENGTH=291
2	3	3	2	3	3	3	3	3		AT5G16370.1	AT5G16370.1;AT5G16340.1	AT5G16370.1 | Symbols: AAE5 | acyl activating enzyme 5 | chr5:5356823-5358481 REVERSE LENGTH=552
3	3	3	3	3	3	3	3	3		AT5G16280.1;AT5G16280.2	AT5G16280.1;AT5G16280.2	AT5G16280.1 | Symbols: | Tetratricopeptide repeat (TPR)-like superfamily protein | chr5:5323377-5331345 REVERSE LENGTH=1272;AT5G16280.2 | Symbols: | Tetratricopeptide repeat (TPR)-like superfamily protein | chr5:5323377-5331345 REVERSE LENGTH=1244
3	3	3	3	3	3	3	3	3		AT5G16130.1	AT5G16130.1	AT5G16130.1 | Symbols: | Ribosomal protein S7e family protein | chr5:5268984-5269912 FORWARD LENGTH=190
3	3	3	3	3	3	3	3	3		AT5G16070.1	AT5G16070.1	AT5G16070.1 | Symbols: | TCP-1/cpn60 chaperonin family protein | chr5:5247549-5251050 REVERSE LENGTH=535
3	3	3	3	3	3	3	3	3		AT5G15910.1	AT5G15910.1	AT5G15910.1 | Symbols: | NAD(P)-binding Rossmann-fold superfamily protein | chr5:5193207-5195202 FORWARD LENGTH=269
3	3	3	3	3	3	3	3	3		AT5G15810.1	AT5G15810.1	AT5G15810.1 | Symbols: | N2,N2-dimethylguanosine tRNA methyltransferase | chr5:5157798-5161121 FORWARD LENGTH=691
3	3	3	3	3	3	3	3	3		AT5G15680.1	AT5G15680.1	AT5G15680.1 | Symbols: | ARM repeat superfamily protein | chr5:5101188-5110793 REVERSE LENGTH=2153
3	3	3	3	3	3	3	3	3		AT5G15650.1	AT5G15650.1	AT5G15650.1 | Symbols: RGP2, ATRGP2 | reversibly glycosylated polypeptide 2 | chr5:5092203-5094093 FORWARD LENGTH=360
3	3	3	3	3	3	3	3	3		AT5G15490.1	AT5G15490.1;AT3G01010.1	AT5G15490.1 | Symbols: | UDP-glucose 6-dehydrogenase family protein | chr5:5027872-5029314 REVERSE LENGTH=480
3	3	3	3	3	3	3	3	3		AT5G15450.1	AT5G15450.1	AT5G15450.1 | Symbols: APG6, CLPB3, CLPB-P | casein lytic proteinase B3 | chr5:5014399-5018255 REVERSE LENGTH=968
3	3	3	3	3	2	3	2	3		AT5G15230.2;AT5G15230.1	AT5G15230.2;AT5G15230.1	AT5G15230.2 | Symbols: GASA4 | GAST1 protein homolog 4 | chr5:4945286-4946025 FORWARD LENGTH=83;AT5G15230.1 | Symbols: GASA4 | GAST1 protein homolog 4 | chr5:4945017-4946025 FORWARD LENGTH=106
3	3	3	3	3	3	3	3	3		AT5G15200.1;AT5G15200.2	AT5G15200.1;AT5G15200.2	AT5G15200.1 | Symbols: | Ribosomal protein S4 | chr5:4935124-4936334 REVERSE LENGTH=198;AT5G15200.2 | Symbols: | Ribosomal protein S4 | chr5:4935602-4936334 REVERSE LENGTH=156
3	3	3	3	3	3	3	3	3		AT5G15090.2;AT5G15090.1	AT5G15090.2;AT5G15090.1	AT5G15090.2 | Symbols: VDAC3 | voltage dependent anion channel 3 | chr5:4889641-4891389 REVERSE LENGTH=274;AT5G15090.1 | Symbols: VDAC3, ATVDAC3 | voltage dependent anion channel 3 | chr5:4889641-4891389 REVERSE LENGTH=274
3	3	3	3	3	3	3	3	3		AT5G14780.1	AT5G14780.1	AT5G14780.1 | Symbols: FDH | formate dehydrogenase | chr5:4777043-4779190 FORWARD LENGTH=384
3	3	3	3	3	3	3	3	3		AT5G14740.2;AT5G14740.1;AT5G14740.5;AT5G14740.4;AT5G14740.3	AT5G14740.2;AT5G14740.1;AT5G14740.5;AT5G14740.4;AT5G14740.3	AT5G14740.2 | Symbols: CA2, CA18, BETA CA2 | carbonic anhydrase 2 | chr5:4760536-4762382 FORWARD LENGTH=259;AT5G14740.1 | Symbols: CA2, CA18, BETA CA2 | carbonic anhydrase 2 | chr5:4758257-4762382 FORWARD LENGTH=331;AT5G14740.5 | Symbols: CA2, CA18, BETA C
3	3	3	3	3	3	3	3	3		AT5G14660.2;AT5G14660.1	AT5G14660.2;AT5G14660.1	AT5G14660.2 | Symbols: PDF1B, DEF2, ATDEF2 | peptide deformylase 1B | chr5:4727129-4728671 REVERSE LENGTH=273;AT5G14660.1 | Symbols: PDF1B, DEF2, ATDEF2 | peptide deformylase 1B | chr5:4727129-4728671 REVERSE LENGTH=273
3	3	3	3	3	3	3	3	3		AT5G14610.2;AT5G14610.1	AT5G14610.2;AT5G14610.1	AT5G14610.2 | Symbols: | DEAD box RNA helicase family protein | chr5:4711271-4714713 FORWARD LENGTH=645;AT5G14610.1 | Symbols: | DEAD box RNA helicase family protein | chr5:4711271-4714713 FORWARD LENGTH=712
3	3	3	3	3	3	3	3	3		AT5G14590.1	AT5G14590.1	AT5G14590.1 | Symbols: | Isocitrate/isopropylmalate dehydrogenase family protein | chr5:4703533-4706627 REVERSE LENGTH=485
2	3	3	3	3	3	3	3	3		AT5G14580.1	AT5G14580.1	AT5G14580.1 | Symbols: | polyribonucleotide nucleotidyltransferase, putative | chr5:4697612-4703013 REVERSE LENGTH=991
3	3	3	3	3	3	3	3	3		AT5G14320.1;AT5G14320.2	AT5G14320.1;AT5G14320.2	AT5G14320.1 | Symbols: | Ribosomal protein S13/S18 family | chr5:4617839-4618772 REVERSE LENGTH=169;AT5G14320.2 | Symbols: | Ribosomal protein S13/S18 family | chr5:4618189-4618772 REVERSE LENGTH=128
3	3	3	3	3	3	3	3	3		AT5G14170.1	AT5G14170.1	AT5G14170.1 | Symbols: CHC1 | SWIB/MDM2 domain superfamily protein | chr5:4568696-4570444 REVERSE LENGTH=534
3	3	3	3	3	3	3	3	3		AT5G14060.2;AT5G14060.1	AT5G14060.2;AT5G14060.1	AT5G14060.2 | Symbols: CARAB-AK-LYS | Aspartate kinase family protein | chr5:4536143-4538993 FORWARD LENGTH=544;AT5G14060.1 | Symbols: CARAB-AK-LYS | Aspartate kinase family protein | chr5:4536143-4538993 FORWARD LENGTH=544
3	3	3	3	3	3	3	3	3		AT5G14050.1	AT5G14050.1	AT5G14050.1 | Symbols: | Transducin/WD40 repeat-like superfamily protein | chr5:4533539-4535179 FORWARD LENGTH=546
3	3	3	3	3	3	3	3	3		AT5G14040.1	AT5G14040.1;AT3G48850.1	AT5G14040.1 | Symbols: PHT3;1 | phosphate transporter 3;1 | chr5:4531059-4532965 REVERSE LENGTH=375
3	3	3	3	3	3	3	3	3		AT5G13850.1	AT5G13850.1	AT5G13850.1 | Symbols: NACA3 | nascent polypeptide-associated complex subunit alpha-like protein 3 | chr5:4471361-4472676 FORWARD LENGTH=204
3	3	3	3	3	3	3	3	3		AT5G13780.1	AT5G13780.1	AT5G13780.1 | Symbols: | Acyl-CoA N-acyltransferases (NAT) superfamily protein | chr5:4447610-4448603 REVERSE LENGTH=192
3	2	3	3	3	3	3	3	3		AT5G13710.2;AT5G13710.1	AT5G13710.2;AT5G13710.1	AT5G13710.2 | Symbols: SMT1, CPH | sterol methyltransferase 1 | chr5:4424048-4426866 REVERSE LENGTH=336;AT5G13710.1 | Symbols: SMT1, CPH | sterol methyltransferase 1 | chr5:4424048-4426866 REVERSE LENGTH=336
3	3	3	3	3	3	3	3	3		AT5G13680.1	AT5G13680.1	AT5G13680.1 | Symbols: ELO2, ABO1 | IKI3 family protein | chr5:4410522-4415471 REVERSE LENGTH=1319
3	3	3	3	3	3	3	3	3		AT5G13650.1;AT5G13650.2	AT5G13650.1;AT5G13650.2	AT5G13650.1 | Symbols: | elongation factor family protein | chr5:4397821-4402364 FORWARD LENGTH=675;AT5G13650.2 | Symbols: | elongation factor family protein | chr5:4397821-4402364 FORWARD LENGTH=676
3	3	3	3	3	3	3	3	3		AT5G13630.1;AT5G13630.2	AT5G13630.1;AT5G13630.2	AT5G13630.1 | Symbols: GUN5, CCH, CHLH, CCH1, ABAR | magnesium-chelatase subunit chlH, chloroplast, putative / Mg-protoporphyrin IX chelatase, putative (CHLH) | chr5:4387567-4392082 REVERSE LENGTH=1381;AT5G13630.2 | Symbols: GUN5, CCH, CHLH, CCH1, ABAR | m
3	3	3	3	3	3	3	3	3		AT5G13590.1	AT5G13590.1	AT5G13590.1 | Symbols: | unknown protein;Has 150 Blast hits to 121 proteins in 42 species: Archae - 0;Bacteria - 8;Metazoa - 80;Fungi - 5;Plants - 17;Viruses - 0;Other Eukaryotes - 40 (source: NCBI BLink). | chr5:4374718-4378647 REVERSE LENGTH=1168
3	3	3	3	3	3	3	3	3		AT5G13530.2;AT5G13530.1	AT5G13530.2;AT5G13530.1	AT5G13530.2 | Symbols: KEG | protein kinases;ubiquitin-protein ligases | chr5:4345618-4354369 FORWARD LENGTH=1624;AT5G13530.1 | Symbols: KEG | protein kinases;ubiquitin-protein ligases | chr5:4345618-4354369 FORWARD LENGTH=1625
3	3	3	3	3	3	3	3	3		AT5G13520.1	AT5G13520.1	AT5G13520.1 | Symbols: | peptidase M1 family protein | chr5:4342117-4344571 REVERSE LENGTH=616
3	3	3	3	3	3	3	3	3		AT5G13510.1	AT5G13510.1	AT5G13510.1 | Symbols: | Ribosomal protein L10 family protein | chr5:4341294-4341956 FORWARD LENGTH=220
3	3	3	3	3	3	3	3	3		AT5G13490.2;AT5G13490.1	AT5G13490.2;AT5G13490.1	AT5G13490.2 | Symbols: AAC2 | ADP/ATP carrier 2 | chr5:4336034-4337379 FORWARD LENGTH=385;AT5G13490.1 | Symbols: AAC2 | ADP/ATP carrier 2 | chr5:4336034-4337379 FORWARD LENGTH=385
3	3	3	3	3	3	3	3	3		AT5G13480.1;AT5G13480.2	AT5G13480.1;AT5G13480.2	AT5G13480.1 | Symbols: FY | Transducin/WD40 repeat-like superfamily protein | chr5:4326638-4331557 REVERSE LENGTH=647;AT5G13480.2 | Symbols: FY | Transducin/WD40 repeat-like superfamily protein | chr5:4326638-4331506 REVERSE LENGTH=653
3	3	3	3	3	3	3	2	3		AT5G13430.1;AT5G13440.1	AT5G13430.1;AT5G13440.1	AT5G13430.1 | Symbols: | Ubiquinol-cytochrome C reductase iron-sulfur subunit | chr5:4305414-4307399 REVERSE LENGTH=272;AT5G13440.1 | Symbols: | Ubiquinol-cytochrome C reductase iron-sulfur subunit | chr5:4308431-4310022 REVERSE LENGTH=274
3	3	3	3	3	3	3	3	3		AT5G13420.1	AT5G13420.1	AT5G13420.1 | Symbols: | Aldolase-type TIM barrel family protein | chr5:4302080-4304212 REVERSE LENGTH=438
3	3	3	3	3	3	3	3	3		AT5G13370.1	AT5G13370.1;AT5G13360.2;AT5G13360.1;AT5G13360.3	AT5G13370.1 | Symbols: | Auxin-responsive GH3 family protein | chr5:4286996-4289424 FORWARD LENGTH=595
3	3	3	3	3	3	3	3	3		AT5G13280.1	AT5G13280.1	AT5G13280.1 | Symbols: AK-LYS1, AK1, AK | aspartate kinase 1 | chr5:4249516-4252654 FORWARD LENGTH=569
3	3	3	3	3	3	3	3	3		AT5G13110.1;AT1G24280.1	AT5G13110.1;AT1G24280.1	AT5G13110.1 | Symbols: G6PD2 | glucose-6-phosphate dehydrogenase 2 | chr5:4158952-4161640 FORWARD LENGTH=596;AT1G24280.1 | Symbols: G6PD3 | glucose-6-phosphate dehydrogenase 3 | chr1:8609495-8612383 FORWARD LENGTH=599
3	3	3	3	3	3	2	3	3		AT5G13030.1	AT5G13030.1	AT5G13030.1 | Symbols: | unknown protein;FUNCTIONS IN: molecular_function unknown;INVOLVED IN: biological_process unknown;LOCATED IN: chloroplast;EXPRESSED IN: 23 plant structures;EXPRESSED DURING: 13 growth stages;CONTAINS InterPro DOMAIN/s: Unchar
3	3	3	3	3	3	3	3	3		AT5G13010.1	AT5G13010.1	AT5G13010.1 | Symbols: EMB3011 | RNA helicase family protein | chr5:4122747-4128660 FORWARD LENGTH=1255
3	3	3	3	3	3	3	3	3		AT5G12940.1	AT5G12940.1	AT5G12940.1 | Symbols: | Leucine-rich repeat (LRR) family protein | chr5:4087782-4088897 FORWARD LENGTH=371
3	3	3	3	3	3	3	3	3		AT5G12860.2;AT5G12860.1	AT5G12860.2;AT5G12860.1	AT5G12860.2 | Symbols: DiT1 | dicarboxylate transporter 1 | chr5:4059850-4061919 REVERSE LENGTH=556;AT5G12860.1 | Symbols: DiT1 | dicarboxylate transporter 1 | chr5:4059927-4061919 REVERSE LENGTH=557
3	3	3	3	3	3	3	3	3		AT5G12470.1	AT5G12470.1	AT5G12470.1 | Symbols: | Protein of unknown function (DUF3411) | chr5:4044950-4047290 REVERSE LENGTH=386
2	3	3	3	3	3	3	3	3		AT5G12410.1	AT5G12410.1	AT5G12410.1 | Symbols: | THUMP domain-containing protein | chr5:4021974-4023950 REVERSE LENGTH=376
2	3	3	3	3	3	3	3	3		AT5G12370.3;AT5G12370.2;AT5G12370.1	AT5G12370.3;AT5G12370.2;AT5G12370.1	AT5G12370.3 | Symbols: SEC10 | exocyst complex component sec10 | chr5:4003002-4008445 REVERSE LENGTH=820;AT5G12370.2 | Symbols: SEC10 | exocyst complex component sec10 | chr5:4003002-4008445 REVERSE LENGTH=825;AT5G12370.1 | Symbols: SEC10 | exocyst complex
3	3	3	3	3	3	3	3	3		AT5G12250.1	AT5G12250.1	AT5G12250.1 | Symbols: TUB6 | beta-6 tubulin | chr5:3961317-3962971 REVERSE LENGTH=449
0	1	2	3	3	3	3	3	3		AT5G12140.1	AT5G12140.1	AT5G12140.1 | Symbols: ATCYS1, CYS1 | cystatin-1 | chr5:3923295-3923936 REVERSE LENGTH=101
3	3	3	3	3	3	3	3	3		AT5G12040.1;AT5G12040.2	AT5G12040.1;AT5G12040.2	AT5G12040.1 | Symbols: | Nitrilase/cyanide hydratase and apolipoprotein N-acyltransferase family protein | chr5:3885162-3887772 FORWARD LENGTH=369;AT5G12040.2 | Symbols: | Nitrilase/cyanide hydratase and apolipoprotein N-acyltransferase family protein |
3	3	3	3	3	3	3	3	3		AT5G11880.1	AT5G11880.1	AT5G11880.1 | Symbols: | Pyridoxal-dependent decarboxylase family protein | chr5:3827806-3829942 REVERSE LENGTH=489
3	3	3	3	3	3	3	3	3		AT5G11670.1	AT5G11670.1;AT5G25880.1	AT5G11670.1 | Symbols: ATNADP-ME2, NADP-ME2 | NADP-malic enzyme 2 | chr5:3754456-3758040 FORWARD LENGTH=588
3	3	3	3	3	3	3	3	3		AT5G11560.1	AT5G11560.1	AT5G11560.1 | Symbols: | catalytics | chr5:3709734-3713994 REVERSE LENGTH=982
3	3	3	3	3	3	3	3	3		AT5G11520.1	AT5G11520.1	AT5G11520.1 | Symbols: ASP3, YLS4 | aspartate aminotransferase 3 | chr5:3685257-3687721 REVERSE LENGTH=449
3	3	3	3	3	3	3	3	3		AT5G11490.1;AT5G11490.2	AT5G11490.1;AT5G11490.2	AT5G11490.1 | Symbols: | adaptin family protein | chr5:3671964-3676144 FORWARD LENGTH=841;AT5G11490.2 | Symbols: | adaptin family protein | chr5:3671964-3676263 FORWARD LENGTH=850
3	3	3	3	3	3	1	3	3		AT5G11480.1	AT5G11480.1	AT5G11480.1 | Symbols: | P-loop containing nucleoside triphosphate hydrolases superfamily protein | chr5:3669350-3671471 REVERSE LENGTH=318
3	3	3	3	3	3	3	3	3		AT5G11450.1	AT5G11450.1	AT5G11450.1 | Symbols: | Mog1/PsbP/DUF1795-like photosystem II reaction center PsbP family protein | chr5:3654475-3656357 FORWARD LENGTH=297
3	3	3	3	3	3	3	3	3		AT5G11420.1	AT5G11420.1	AT5G11420.1 | Symbols: | Protein of unknown function, DUF642 | chr5:3644655-3646991 FORWARD LENGTH=366
3	3	3	3	3	3	3	3	3		AT5G11240.1	AT5G11240.1	AT5G11240.1 | Symbols: | transducin family protein / WD-40 repeat family protein | chr5:3582949-3586782 FORWARD LENGTH=615
3	3	3	3	3	3	3	3	3		AT5G11200.1;AT5G11170.1;AT5G11200.3;AT5G11200.2;AT5G11170.2	AT5G11200.1;AT5G11170.1;AT5G11200.3;AT5G11200.2;AT5G11170.2	AT5G11200.1 | Symbols: | DEAD/DEAH box RNA helicase family protein | chr5:3567389-3570686 FORWARD LENGTH=427;AT5G11170.1 | Symbols: | DEAD/DEAH box RNA helicase family protein | chr5:3553334-3556646 FORWARD LENGTH=427;AT5G11200.3 | Symbols: | DEAD/DEA
3	2	3	2	3	3	1	2	2		AT5G11060.1	AT5G11060.1	AT5G11060.1 | Symbols: KNAT4 | KNOTTED1-like homeobox gene 4 | chr5:3510408-3512967 FORWARD LENGTH=393
3	3	3	3	3	3	3	3	3		AT5G11040.1	AT5G11040.1	AT5G11040.1 | Symbols: TRS120, AtTRS120 | TRS120 | chr5:3495332-3500610 FORWARD LENGTH=1186
3	3	3	3	3	3	3	3	3		AT5G10980.1;AT4G40040.2;AT4G40040.1;AT4G40030.3;AT4G40030.1;AT4G40030.2	AT5G10980.1;AT4G40040.2;AT4G40040.1;AT4G40030.3;AT4G40030.1;AT4G40030.2;AT1G75600.1	AT5G10980.1 | Symbols: | Histone superfamily protein | chr5:3472591-3473349 REVERSE LENGTH=136;AT4G40040.2 | Symbols: | Histone superfamily protein | chr4:18557539-18558236 REVERSE LENGTH=136;AT4G40040.1 | Symbols: | Histone superfamily protein | chr4:1
3	3	3	3	3	3	3	3	3		AT5G10860.1	AT5G10860.1	AT5G10860.1 | Symbols: | Cystathionine beta-synthase (CBS) family protein | chr5:3429173-3430142 REVERSE LENGTH=206
3	3	3	3	3	3	3	3	3		AT5G10470.1;AT5G10470.2	AT5G10470.1;AT5G10470.2	AT5G10470.1 | Symbols: KCA1, KAC1 | kinesin like protein for actin based chloroplast movement 1 | chr5:3290121-3297248 REVERSE LENGTH=1273;AT5G10470.2 | Symbols: KAC1 | kinesin like protein for actin based chloroplast movement 1 | chr5:3290121-3297248 REVE
3	3	3	3	3	3	3	3	3		AT5G10450.2;AT5G10450.1;AT5G10450.3;AT5G10450.4	AT5G10450.2;AT5G10450.1;AT5G10450.3;AT5G10450.4	AT5G10450.2 | Symbols: GRF6, AFT1, 14-3-3lambda | G-box regulating factor 6 | chr5:3284452-3286261 REVERSE LENGTH=246;AT5G10450.1 | Symbols: GRF6, AFT1, 14-3-3lambda | G-box regulating factor 6 | chr5:3284452-3286261 REVERSE LENGTH=248;AT5G10450.3 | Symbol
3	3	3	3	3	3	3	3	3		AT5G10360.1;AT5G10360.2	AT5G10360.1;AT5G10360.2	AT5G10360.1 | Symbols: EMB3010, RPS6B | Ribosomal protein S6e | chr5:3258734-3260142 REVERSE LENGTH=249;AT5G10360.2 | Symbols: EMB3010 | Ribosomal protein S6e | chr5:3258734-3260142 REVERSE LENGTH=197
3	3	3	3	3	3	3	3	3		AT5G10240.2;AT5G10240.1	AT5G10240.2;AT5G10240.1	AT5G10240.2 | Symbols: ASN3 | asparagine synthetase 3 | chr5:3212934-3216418 REVERSE LENGTH=577;AT5G10240.1 | Symbols: ASN3 | asparagine synthetase 3 | chr5:3212934-3216418 REVERSE LENGTH=578
3	3	3	3	3	3	3	3	3		AT5G10010.1	AT5G10010.1	AT5G10010.1 | Symbols: | unknown protein;FUNCTIONS IN: molecular_function unknown;INVOLVED IN: biological_process unknown;LOCATED IN: nucleolus;EXPRESSED IN: 25 plant structures;EXPRESSED DURING: 15 growth stages;BEST Arabidopsis thaliana protein ma
3	3	3	3	3	3	3	3	3		AT5G09900.1;AT5G09900.2;AT5G09900.3	AT5G09900.1;AT5G09900.2;AT5G09900.3	AT5G09900.1 | Symbols: EMB2107, RPN5A, MSA | 26S proteasome regulatory subunit, putative (RPN5) | chr5:3089462-3092434 REVERSE LENGTH=442;AT5G09900.2 | Symbols: EMB2107, RPN5A, MSA | 26S proteasome regulatory subunit, putative (RPN5) | chr5:3089462-3092434
3	3	3	3	3	3	3	3	3		AT5G09880.1	AT5G09880.1	AT5G09880.1 | Symbols: | Splicing factor, CC1-like | chr5:3081646-3085179 REVERSE LENGTH=527
3	3	3	3	3	3	3	3	3		AT5G09810.1	AT5G09810.1	AT5G09810.1 | Symbols: ACT7 | actin 7 | chr5:3052809-3054220 FORWARD LENGTH=377
3	3	3	3	3	3	3	3	3		AT5G09660.2;AT5G09660.1;AT5G09660.3;AT5G09660.4	AT5G09660.2;AT5G09660.1;AT5G09660.3;AT5G09660.4	AT5G09660.2 | Symbols: PMDH2 | peroxisomal NAD-malate dehydrogenase 2 | chr5:2993645-2995169 REVERSE LENGTH=333;AT5G09660.1 | Symbols: PMDH2 | peroxisomal NAD-malate dehydrogenase 2 | chr5:2993645-2995551 REVERSE LENGTH=354;AT5G09660.3 | Symbols: PMDH2 | p
0	0	0	2	0	3	0	3	3		AT5G09620.1	AT5G09620.1	AT5G09620.1 | Symbols: | Octicosapeptide/Phox/Bem1p family protein | chr5:2983757-2985352 REVERSE LENGTH=531
3	3	3	3	3	3	3	3	3		AT5G09590.1	AT5G09590.1;AT4G32208.1	AT5G09590.1 | Symbols: MTHSC70-2, HSC70-5 | mitochondrial HSO70 2 | chr5:2975721-2978508 FORWARD LENGTH=682
3	3	3	3	3	3	3	3	3		AT5G09510.1;AT1G04270.2;AT1G04270.1;AT5G09510.2	AT5G09510.1;AT1G04270.2;AT1G04270.1;AT5G09510.2;AT5G43640.1;AT5G09500.1	AT5G09510.1 | Symbols: | Ribosomal protein S19 family protein | chr5:2955698-2956554 REVERSE LENGTH=152;AT1G04270.2 | Symbols: RPS15 | cytosolic ribosomal protein S15 | chr1:1141852-1142960 REVERSE LENGTH=151;AT1G04270.1 | Symbols: RPS15 | cytosolic ribos
3	3	3	3	3	3	3	3	3		AT5G09230.5;AT5G09230.2;AT5G09230.1;AT5G09230.7;AT5G09230.3;AT5G09230.6;AT5G09230.4	AT5G09230.5;AT5G09230.2;AT5G09230.1;AT5G09230.7;AT5G09230.3;AT5G09230.6;AT5G09230.4	AT5G09230.5 | Symbols: SRT2 | sirtuin 2 | chr5:2871839-2873613 FORWARD LENGTH=354;AT5G09230.2 | Symbols: SRT2 | sirtuin 2 | chr5:2871655-2873613 FORWARD LENGTH=373;AT5G09230.1 | Symbols: SRT2, AtSRT2 | sirtuin 2 | chr5:2871655-2873613 FORWARD LENGTH=373;AT
3	3	3	3	3	3	3	3	3		AT5G08690.1;AT5G08670.1;AT5G08680.1	AT5G08690.1;AT5G08670.1;AT5G08680.1	AT5G08690.1 | Symbols: | ATP synthase alpha/beta family protein | chr5:2825739-2828352 FORWARD LENGTH=556;AT5G08670.1 | Symbols: | ATP synthase alpha/beta family protein | chr5:2818395-2821149 REVERSE LENGTH=556;AT5G08680.1 | Symbols: | ATP synthase alp
3	3	3	3	3	3	3	3	3		AT5G08650.1	AT5G08650.1	AT5G08650.1 | Symbols: | Small GTP-binding protein | chr5:2806533-2813220 REVERSE LENGTH=681
3	3	3	3	3	3	3	3	3		AT5G08610.1	AT5G08610.1;AT5G08620.1;AT5G63630.1	AT5G08610.1 | Symbols: | P-loop containing nucleoside triphosphate hydrolases superfamily protein | chr5:2790341-2794059 FORWARD LENGTH=850
3	3	3	3	3	3	3	3	3		AT5G08590.1;AT5G63650.1	AT5G08590.1;AT5G63650.1	AT5G08590.1 | Symbols: ASK2, SNRK2-1, SNRK2.1, SRK2G | SNF1-related protein kinase 2.1 | chr5:2783537-2785869 FORWARD LENGTH=353;AT5G63650.1 | Symbols: SNRK2-5, SNRK2.5, SRK2H | SNF1-related protein kinase 2.5 | chr5:25481631-25483495 REVERSE LENGTH=360
3	3	3	3	3	3	3	3	3		AT5G08570.1	AT5G08570.1;AT3G25960.1;AT3G04050.1;AT3G55650.1	AT5G08570.1 | Symbols: | Pyruvate kinase family protein | chr5:2778433-2780300 FORWARD LENGTH=510
3	3	3	3	3	3	3	3	3		AT5G08530.1	AT5G08530.1	AT5G08530.1 | Symbols: CI51 | 51 kDa subunit of complex I | chr5:2759848-2761726 REVERSE LENGTH=486
3	3	3	3	3	3	3	3	3		AT5G08450.3;AT5G08450.2;AT5G08450.1	AT5G08450.3;AT5G08450.2;AT5G08450.1	AT5G08450.3 | Symbols: | FUNCTIONS IN: molecular_function unknown;INVOLVED IN: biological_process unknown;LOCATED IN: cellular_component unknown;EXPRESSED IN: 25 plant structures;EXPRESSED DURING: 15 growth stages;CONTAINS InterPro DOMAIN/s: Histone
3	3	3	3	3	3	3	3	3		AT5G08300.1	AT5G08300.1;AT5G23250.2;AT5G23250.1	AT5G08300.1 | Symbols: | Succinyl-CoA ligase, alpha subunit | chr5:2667579-2669672 FORWARD LENGTH=347
3	3	3	3	3	3	3	3	3		AT5G08280.1	AT5G08280.1	AT5G08280.1 | Symbols: HEMC | hydroxymethylbilane synthase | chr5:2663763-2665596 REVERSE LENGTH=382
3	3	3	3	3	3	3	3	3		AT5G08180.2;AT5G08180.1	AT5G08180.2;AT5G08180.1	AT5G08180.2 | Symbols: | Ribosomal protein L7Ae/L30e/S12e/Gadd45 family protein | chr5:2631843-2633374 REVERSE LENGTH=156;AT5G08180.1 | Symbols: | Ribosomal protein L7Ae/L30e/S12e/Gadd45 family protein | chr5:2631843-2633374 REVERSE LENGTH=156
0	0	0	0	2	3	1	2	3		AT5G08170.1	AT5G08170.1	AT5G08170.1 | Symbols: EMB1873, ATAIH | porphyromonas-type peptidyl-arginine deiminase family protein | chr5:2628663-2631047 REVERSE LENGTH=383
0	0	0	3	3	3	2	3	3		AT5G08130.3;AT5G08130.5;AT5G08130.1;AT5G08130.4;AT5G08130.2;AT5G08130.6	AT5G08130.3;AT5G08130.5;AT5G08130.1;AT5G08130.4;AT5G08130.2;AT5G08130.6	AT5G08130.3 | Symbols: | basic helix-loop-helix (bHLH) DNA-binding superfamily protein | chr5:2606655-2608652 REVERSE LENGTH=408;AT5G08130.5 | Symbols: BIM1 | basic helix-loop-helix (bHLH) DNA-binding superfamily protein | chr5:2606655-2609571 REVERSE LEN
3	1	1	3	2	3	0	2	3		AT5G07980.1	AT5G07980.1	AT5G07980.1 | Symbols: | dentin sialophosphoprotein-related | chr5:2549432-2554669 REVERSE LENGTH=1501
3	3	3	3	3	3	3	3	3		AT5G07440.2;AT5G07440.1;AT5G07440.3	AT5G07440.2;AT5G07440.1;AT5G07440.3	AT5G07440.2 | Symbols: GDH2 | glutamate dehydrogenase 2 | chr5:2356153-2358012 FORWARD LENGTH=411;AT5G07440.1 | Symbols: GDH2 | glutamate dehydrogenase 2 | chr5:2356153-2358012 FORWARD LENGTH=411;AT5G07440.3 | Symbols: GDH2 | glutamate dehydrogenase 2 | ch
3	3	3	3	3	3	3	3	3		AT5G07350.1;AT5G07350.2	AT5G07350.1;AT5G07350.2	AT5G07350.1 | Symbols: Tudor1, AtTudor1, TSN1 | TUDOR-SN protein 1 | chr5:2320344-2324892 REVERSE LENGTH=991;AT5G07350.2 | Symbols: Tudor1, AtTudor1, TSN1 | TUDOR-SN protein 1 | chr5:2320021-2324892 REVERSE LENGTH=1007
3	3	3	3	3	3	3	3	3		AT5G07090.2;AT2G17360.1;AT5G07090.1;AT2G17360.2	AT5G07090.2;AT2G17360.1;AT5G07090.1;AT2G17360.2	AT5G07090.2 | Symbols: | Ribosomal protein S4 (RPS4A) family protein | chr5:2202783-2203805 FORWARD LENGTH=244;AT2G17360.1 | Symbols: | Ribosomal protein S4 (RPS4A) family protein | chr2:7546598-7548138 FORWARD LENGTH=261;AT5G07090.1 | Symbols: | Riboso
3	3	3	3	3	3	3	3	3		AT5G07030.1	AT5G07030.1	AT5G07030.1 | Symbols: | Eukaryotic aspartyl protease family protein | chr5:2183600-2185717 REVERSE LENGTH=455
3	3	3	3	3	3	3	3	3		AT5G06970.1	AT5G06970.1	AT5G06970.1 | Symbols: | Protein of unknown function (DUF810) | chr5:2158431-2166004 REVERSE LENGTH=1101
3	3	3	3	3	3	1	3	3		AT5G06860.1	AT5G06860.1	AT5G06860.1 | Symbols: PGIP1, ATPGIP1 | polygalacturonase inhibiting protein 1 | chr5:2132373-2133434 FORWARD LENGTH=330
3	3	3	3	3	3	3	3	3		AT5G06600.2;AT5G06600.1;AT5G06600.3	AT5G06600.2;AT5G06600.1;AT5G06600.3	AT5G06600.2 | Symbols: UBP12 | ubiquitin-specific protease 12 | chr5:2019545-2027834 REVERSE LENGTH=1115;AT5G06600.1 | Symbols: UBP12 | ubiquitin-specific protease 12 | chr5:2019545-2027834 REVERSE LENGTH=1116;AT5G06600.3 | Symbols: UBP12 | ubiquitin-speci
3	3	3	3	3	3	3	3	3		AT5G06460.1	AT5G06460.1	AT5G06460.1 | Symbols: ATUBA2, UBA 2 | ubiquitin activating enzyme 2 | chr5:1970239-1974382 FORWARD LENGTH=1077
3	3	3	3	3	3	3	3	3		AT5G06360.1	AT5G06360.1	AT5G06360.1 | Symbols: | Ribosomal protein S8e family protein | chr5:1944835-1946512 FORWARD LENGTH=260
3	3	3	2	2	3	2	2	1		AT5G06320.1	AT5G06320.1	AT5G06320.1 | Symbols: NHL3 | NDR1/HIN1-like 3 | chr5:1931016-1931711 REVERSE LENGTH=231
3	3	3	3	3	3	3	3	3		AT5G06120.3;AT5G06120.2;AT5G06120.4;AT5G06120.1	AT5G06120.3;AT5G06120.2;AT5G06120.4;AT5G06120.1	AT5G06120.3 | Symbols: | ARM repeat superfamily protein | chr5:1845309-1852601 FORWARD LENGTH=1052;AT5G06120.2 | Symbols: | ARM repeat superfamily protein | chr5:1845309-1852601 FORWARD LENGTH=1052;AT5G06120.4 | Symbols: | ARM repeat superfamily protein
3	3	3	3	3	3	3	1	3		AT5G06060.1	AT5G06060.1;AT2G29350.2;AT2G29350.3;AT2G29290.1;AT2G29370.1;AT2G29350.1;AT2G29360.1	AT5G06060.1 | Symbols: | NAD(P)-binding Rossmann-fold superfamily protein | chr5:1824066-1825833 REVERSE LENGTH=264
3	3	3	3	3	3	3	3	3		AT5G05620.1	AT5G05620.1	AT5G05620.1 | Symbols: TUBG2, ATGCP2, GCP2 | gamma-tubulin complex protein 2 | chr5:1679340-1681719 FORWARD LENGTH=474
3	3	3	3	3	3	3	3	3		AT5G05470.1	AT5G05470.1	AT5G05470.1 | Symbols: EIF2 ALPHA, ATEIF2-A2, EIF2-A2 | eukaryotic translation initiation factor 2 alpha subunit | chr5:1620579-1622214 FORWARD LENGTH=344
3	3	3	3	3	3	3	3	3		AT5G05370.1;AT3G10860.1	AT5G05370.1;AT3G10860.1	AT5G05370.1 | Symbols: | Cytochrome b-c1 complex, subunit 8 protein | chr5:1590977-1591869 REVERSE LENGTH=72;AT3G10860.1 | Symbols: | Cytochrome b-c1 complex, subunit 8 protein | chr3:3399815-3400514 FORWARD LENGTH=72
3	3	2	3	3	3	3	3	3		AT5G05170.1	AT5G05170.1;AT1G32180.1;AT5G17420.1;AT5G44030.1;AT4G38190.1;AT1G02730.1	AT5G05170.1 | Symbols: CESA3, IXR1, ATCESA3, ATH-B, CEV1 | Cellulose synthase family protein | chr5:1530401-1535090 REVERSE LENGTH=1065
3	3	3	3	3	3	3	3	3		AT5G05010.2;AT5G05010.1	AT5G05010.2;AT5G05010.1	AT5G05010.2 | Symbols: | clathrin adaptor complexes medium subunit family protein | chr5:1477137-1479872 FORWARD LENGTH=527;AT5G05010.1 | Symbols: | clathrin adaptor complexes medium subunit family protein | chr5:1477137-1479872 FORWARD LENGTH=527
3	3	3	3	3	3	3	3	3		AT5G05000.3;AT5G05000.2;AT5G05000.1	AT5G05000.3;AT5G05000.2;AT5G05000.1	AT5G05000.3 | Symbols: TOC34, ATTOC34, OEP34 | translocon at the outer envelope membrane of chloroplasts 34 | chr5:1474262-1475772 REVERSE LENGTH=313;AT5G05000.2 | Symbols: TOC34, ATTOC34, OEP34 | translocon at the outer envelope membrane of chloroplasts 3
2	3	3	3	3	3	3	3	3		AT5G04810.1	AT5G04810.1	AT5G04810.1 | Symbols: | pentatricopeptide (PPR) repeat-containing protein | chr5:1390049-1393760 FORWARD LENGTH=952
2	3	3	3	3	3	3	3	3		AT5G04600.1	AT5G04600.1	AT5G04600.1 | Symbols: | RNA-binding (RRM/RBD/RNP motifs) family protein | chr5:1323700-1325486 FORWARD LENGTH=222
3	3	3	3	3	3	3	3	3		AT5G04590.1	AT5G04590.1	AT5G04590.1 | Symbols: SIR | sulfite reductase | chr5:1319404-1322298 FORWARD LENGTH=642
3	3	3	3	3	3	3	3	3		AT5G04530.1	AT5G04530.1	AT5G04530.1 | Symbols: KCS19 | 3-ketoacyl-CoA synthase 19 | chr5:1292222-1293616 REVERSE LENGTH=464
3	3	3	3	3	3	3	3	3		AT5G04430.1;AT5G04430.2	AT5G04430.1;AT5G04430.2	AT5G04430.1 | Symbols: BTR1, BTR1S | binding to TOMV RNA 1L (long form) | chr5:1250602-1253523 REVERSE LENGTH=313;AT5G04430.2 | Symbols: BTR1, BTR1L | binding to TOMV RNA 1L (long form) | chr5:1250602-1253523 REVERSE LENGTH=334
3	3	3	3	3	3	3	3	3		AT5G04280.1	AT5G04280.1	AT5G04280.1 | Symbols: | RNA-binding (RRM/RBD/RNP motifs) family protein with retrovirus zinc finger-like domain | chr5:1192461-1195413 FORWARD LENGTH=310
0	3	3	3	3	3	3	3	3		AT5G04230.1;AT5G04230.2	AT5G04230.1;AT5G04230.2	AT5G04230.1 | Symbols: PAL3, ATPAL3 | phenyl alanine ammonia-lyase 3 | chr5:1160831-1163707 FORWARD LENGTH=694;AT5G04230.2 | Symbols: PAL3 | phenyl alanine ammonia-lyase 3 | chr5:1160831-1163707 FORWARD LENGTH=698
3	3	3	3	3	3	3	3	3		AT5G04140.1;AT5G04140.2	AT5G04140.1;AT5G04140.2;AT2G41220.1	AT5G04140.1 | Symbols: GLU1, GLS1, GLUS, FD-GOGAT | glutamate synthase 1 | chr5:1130031-1138186 FORWARD LENGTH=1622;AT5G04140.2 | Symbols: GLU1, GLS1, GLUS, FD-GOGAT | glutamate synthase 1 | chr5:1130031-1138186 FORWARD LENGTH=1648
3	3	3	3	3	3	3	3	3		AT5G04130.1;AT5G04130.2	AT5G04130.1;AT5G04130.2	AT5G04130.1 | Symbols: GYRB2 | DNA GYRASE B2 | chr5:1122084-1128031 REVERSE LENGTH=732;AT5G04130.2 | Symbols: | DNA GYRASE B2 | chr5:1123729-1128031 REVERSE LENGTH=519
3	3	3	3	3	3	3	3	3		AT5G03940.1	AT5G03940.1	AT5G03940.1 | Symbols: FFC, 54CP, CPSRP54, SRP54CP | chloroplast signal recognition particle 54 kDa subunit | chr5:1060265-1063257 REVERSE LENGTH=564
2	2	3	3	3	3	3	3	3		AT5G03880.1	AT5G03880.1	AT5G03880.1 | Symbols: | Thioredoxin family protein | chr5:1038674-1041453 REVERSE LENGTH=339
3	3	3	3	3	3	3	3	3		AT5G03860.2;AT5G03860.1	AT5G03860.2;AT5G03860.1	AT5G03860.2 | Symbols: MLS | malate synthase | chr5:1032276-1034527 REVERSE LENGTH=562;AT5G03860.1 | Symbols: MLS | malate synthase | chr5:1032276-1034527 REVERSE LENGTH=562
3	3	3	3	3	3	3	3	3		AT5G03850.1;AT3G10090.1	AT5G03850.1;AT3G10090.1	AT5G03850.1 | Symbols: | Nucleic acid-binding, OB-fold-like protein | chr5:1028542-1028736 REVERSE LENGTH=64;AT3G10090.1 | Symbols: | Nucleic acid-binding, OB-fold-like protein | chr3:3108960-3109154 REVERSE LENGTH=64
3	3	3	3	3	3	3	3	3		AT5G03650.1	AT5G03650.1	AT5G03650.1 | Symbols: SBE2.2 | starch branching enzyme 2.2 | chr5:931924-937470 FORWARD LENGTH=805
3	3	3	3	3	3	3	3	3		AT5G03630.1	AT5G03630.1	AT5G03630.1 | Symbols: ATMDAR2 | Pyridine nucleotide-disulphide oxidoreductase family protein | chr5:922378-924616 REVERSE LENGTH=435
3	3	3	3	3	3	3	3	3		AT5G03300.1	AT5G03300.1	AT5G03300.1 | Symbols: ADK2 | adenosine kinase 2 | chr5:796573-798997 FORWARD LENGTH=345
3	3	3	3	3	3	3	3	3		AT5G03290.1	AT5G03290.1;AT3G09810.1	AT5G03290.1 | Symbols: IDH-V | isocitrate dehydrogenase V | chr5:794043-795939 FORWARD LENGTH=374
3	3	3	3	3	3	3	3	3		AT5G03040.3;AT5G03040.2;AT5G03040.1	AT5G03040.3;AT5G03040.2;AT5G03040.1	AT5G03040.3 | Symbols: iqd2 | IQ-domain 2 | chr5:710380-712406 REVERSE LENGTH=461;AT5G03040.2 | Symbols: iqd2 | IQ-domain 2 | chr5:710380-712406 REVERSE LENGTH=461;AT5G03040.1 | Symbols: iqd2 | IQ-domain 2 | chr5:710380-712406 REVERSE LENGTH=461
3	3	3	3	3	3	3	3	3		AT5G02960.1;AT3G09680.1	AT5G02960.1;AT3G09680.1	AT5G02960.1 | Symbols: | Ribosomal protein S12/S23 family protein | chr5:693280-694396 REVERSE LENGTH=142;AT3G09680.1 | Symbols: | Ribosomal protein S12/S23 family protein | chr3:2969197-2970291 REVERSE LENGTH=142
3	3	3	3	3	3	3	3	3		AT5G02890.1	AT5G02890.1	AT5G02890.1 | Symbols: | HXXXD-type acyl-transferase family protein | chr5:670207-671454 REVERSE LENGTH=353
3	3	3	3	3	3	3	3	3		AT5G02870.1;AT5G02870.2	AT5G02870.1;AT5G02870.2	AT5G02870.1 | Symbols: | Ribosomal protein L4/L1 family | chr5:657830-659526 FORWARD LENGTH=407;AT5G02870.2 | Symbols: | Ribosomal protein L4/L1 family | chr5:657830-659526 FORWARD LENGTH=406
3	3	3	3	3	3	3	3	3		AT5G02740.1;AT5G02740.2	AT5G02740.1;AT5G02740.2	AT5G02740.1 | Symbols: | Ribosomal protein S24e family protein | chr5:616517-618267 FORWARD LENGTH=228;AT5G02740.2 | Symbols: | Ribosomal protein S24e family protein | chr5:616517-617721 FORWARD LENGTH=185
3	3	3	3	3	3	3	3	3		AT5G02560.1;AT5G02560.2	AT5G02560.1;AT5G02560.2	AT5G02560.1 | Symbols: HTA12 | histone H2A 12 | chr5:575437-576456 FORWARD LENGTH=153;AT5G02560.2 | Symbols: HTA12 | histone H2A 12 | chr5:575437-576456 FORWARD LENGTH=177
3	3	3	3	3	3	3	3	3		AT5G02530.2;AT5G02530.1	AT5G02530.2;AT5G02530.1	AT5G02530.2 | Symbols: | RNA-binding (RRM/RBD/RNP motifs) family protein | chr5:564332-565776 REVERSE LENGTH=290;AT5G02530.1 | Symbols: | RNA-binding (RRM/RBD/RNP motifs) family protein | chr5:564332-565776 REVERSE LENGTH=292
3	3	3	3	3	3	3	3	3		AT5G02500.1;AT5G02500.2	AT5G02500.1;AT5G02500.2	AT5G02500.1 | Symbols: HSC70-1, HSP70-1, AT-HSC70-1, HSC70 | heat shock cognate protein 70-1 | chr5:554055-556334 REVERSE LENGTH=651;AT5G02500.2 | Symbols: HSC70-1, HSP70-1, AT-HSC70-1, HSC70 | heat shock cognate protein 70-1 | chr5:554055-556334 REVERSE L
3	3	3	3	3	3	3	3	3		AT5G02490.1;AT1G56410.1	AT5G02490.1;AT1G56410.1	AT5G02490.1 | Symbols: | Heat shock protein 70 (Hsp 70) family protein | chr5:550296-552565 REVERSE LENGTH=653;AT1G56410.1 | Symbols: ERD2, HSP70T-1 | heat shock protein 70 (Hsp 70) family protein | chr1:21117147-21119241 FORWARD LENGTH=617
1	1	3	2	3	3	3	3	3		AT5G02310.1	AT5G02310.1	AT5G02310.1 | Symbols: PRT6 | proteolysis 6 | chr5:474279-482552 FORWARD LENGTH=2006
3	3	3	3	3	3	3	3	3		AT5G02270.1;AT5G02270.2	AT5G02270.1;AT5G02270.2	AT5G02270.1 | Symbols: ATNAP9, NAP9 | non-intrinsic ABC protein 9 | chr5:467269-469041 REVERSE LENGTH=328;AT5G02270.2 | Symbols: NAP9 | non-intrinsic ABC protein 9 | chr5:467269-469041 REVERSE LENGTH=354
2	3	3	3	3	3	3	2	3		AT5G02250.1	AT5G02250.1	AT5G02250.1 | Symbols: EMB2730, RNR1, ATMTRNASEII | Ribonuclease II/R family protein | chr5:454902-459063 FORWARD LENGTH=803
3	3	3	3	3	3	3	3	3		AT5G02160.1	AT5G02160.1	AT5G02160.1 | Symbols: | unknown protein;FUNCTIONS IN: molecular_function unknown;INVOLVED IN: biological_process unknown;LOCATED IN: chloroplast thylakoid membrane;EXPRESSED IN: 23 plant structures;EXPRESSED DURING: 13 growth stages;Has 121 Blast h
3	3	3	3	3	3	3	3	3		AT5G01920.1	AT5G01920.1	AT5G01920.1 | Symbols: STN8 | Protein kinase superfamily protein | chr5:359154-360867 FORWARD LENGTH=495
3	3	3	3	3	3	3	3	3		AT5G01750.2;AT5G01750.1	AT5G01750.2;AT5G01750.1	AT5G01750.2 | Symbols: | Protein of unknown function (DUF567) | chr5:290034-291109 FORWARD LENGTH=217;AT5G01750.1 | Symbols: | Protein of unknown function (DUF567) | chr5:290034-290685 FORWARD LENGTH=174
1	1	2	2	3	3	3	2	3		AT5G01650.1;AT5G01650.2	AT5G01650.1;AT5G01650.2	AT5G01650.1 | Symbols: | Tautomerase/MIF superfamily protein | chr5:242734-244033 REVERSE LENGTH=115;AT5G01650.2 | Symbols: | Tautomerase/MIF superfamily protein | chr5:243067-244033 REVERSE LENGTH=122
2	3	3	2	3	3	3	3	3		AT5G01590.1	AT5G01590.1	AT5G01590.1 | Symbols: | unknown protein;FUNCTIONS IN: molecular_function unknown;INVOLVED IN: biological_process unknown;LOCATED IN: chloroplast, chloroplast envelope;EXPRESSED IN: 22 plant structures;EXPRESSED DURING: 13 growth stages;Has 60 Blast
3	3	3	3	3	3	3	3	3		AT5G01530.1	AT5G01530.1	AT5G01530.1 | Symbols: LHCB4.1 | light harvesting complex photosystem II | chr5:209084-210243 FORWARD LENGTH=290
3	3	3	3	3	3	3	3	3		AT5G01410.1	AT5G01410.1;AT2G38210.1	AT5G01410.1 | Symbols: PDX1, ATPDX1.3, RSR4, PDX1.3, ATPDX1 | Aldolase-type TIM barrel family protein | chr5:172576-173505 REVERSE LENGTH=309
3	1	3	2	2	3	3	3	2		AT5G01220.1	AT5G01220.1	AT5G01220.1 | Symbols: SQD2 | sulfoquinovosyldiacylglycerol 2 | chr5:86907-89885 REVERSE LENGTH=510
2	3	3	3	3	3	3	2	3		AT5G01210.1	AT5G01210.1	AT5G01210.1 | Symbols: | HXXXD-type acyl-transferase family protein | chr5:84554-85981 FORWARD LENGTH=475
3	3	3	2	3	3	1	3	3		AT5G01160.1	AT5G01160.1	AT5G01160.1 | Symbols: | RING/U-box superfamily protein | chr5:54280-55727 FORWARD LENGTH=360
3	3	3	3	3	3	3	3	3		AT4G39990.1;AT5G47960.1	AT4G39990.1;AT5G47960.1;AT2G43130.1;AT3G07410.1;AT2G31680.1;AT5G47520.1;AT3G12160.1;AT1G01200.1;AT1G05810.1	AT4G39990.1 | Symbols: ATRABA4B, ATRAB11G, ATGB3, RABA4B | RAB GTPase homolog A4B | chr4:18542722-18543779 FORWARD LENGTH=224;AT5G47960.1 | Symbols: SMG1, ATRABA4C, RABA4C | RAB GTPase homolog A4C | chr5:19421533-19422473 REVERSE LENGTH=223
3	3	3	3	3	3	3	3	3		AT4G39980.1	AT4G39980.1	AT4G39980.1 | Symbols: DHS1 | 3-deoxy-D-arabino-heptulosonate 7-phosphate synthase 1 | chr4:18539654-18541832 FORWARD LENGTH=525
3	3	3	3	3	3	3	3	3		AT4G39960.1	AT4G39960.1	AT4G39960.1 | Symbols: | Molecular chaperone Hsp40/DnaJ family protein | chr4:18534194-18536320 FORWARD LENGTH=447
3	3	3	3	3	3	3	3	3		AT4G39710.2;AT4G39710.1	AT4G39710.2;AT4G39710.1	AT4G39710.2 | Symbols: FKBP16-2 | FK506-binding protein 16-2 | chr4:18427447-18428325 REVERSE LENGTH=177;AT4G39710.1 | Symbols: FKBP16-2 | FK506-binding protein 16-2 | chr4:18427249-18428325 REVERSE LENGTH=217
3	3	3	3	3	3	3	3	3		AT4G39680.2;AT4G39680.1	AT4G39680.2;AT4G39680.1	AT4G39680.2 | Symbols: | SAP domain-containing protein | chr4:18414604-18416938 REVERSE LENGTH=633;AT4G39680.1 | Symbols: | SAP domain-containing protein | chr4:18414604-18416938 REVERSE LENGTH=633
3	3	3	3	3	3	3	3	3		AT4G39660.1	AT4G39660.1	AT4G39660.1 | Symbols: AGT2 | alanine:glyoxylate aminotransferase 2 | chr4:18406797-18409262 FORWARD LENGTH=476
3	3	3	3	3	3	3	3	3		AT4G39520.1	AT4G39520.1	AT4G39520.1 | Symbols: | GTP-binding protein-related | chr4:18371329-18374000 REVERSE LENGTH=369
3	2	3	3	3	3	2	3	3		AT4G39460.2;AT4G39460.1	AT4G39460.2;AT4G39460.1;AT1G34065.1	AT4G39460.2 | Symbols: SAMC1 | S-adenosylmethionine carrier 1 | chr4:18356093-18358596 REVERSE LENGTH=325;AT4G39460.1 | Symbols: SAMC1, SAMT1 | S-adenosylmethionine carrier 1 | chr4:18356093-18358596 REVERSE LENGTH=325
3	3	3	3	3	3	3	3	3		AT4G39330.1;AT4G39330.2	AT4G39330.1;AT4G39330.2	AT4G39330.1 | Symbols: ATCAD9, CAD9 | cinnamyl alcohol dehydrogenase 9 | chr4:18291268-18292772 FORWARD LENGTH=360;AT4G39330.2 | Symbols: ATCAD9, CAD9 | cinnamyl alcohol dehydrogenase 9 | chr4:18291268-18292740 FORWARD LENGTH=311
3	3	3	3	3	3	3	3	3		AT4G39280.2;AT4G39280.1	AT4G39280.2;AT4G39280.1	AT4G39280.2 | Symbols: | phenylalanyl-tRNA synthetase, putative / phenylalanine--tRNA ligase, putative | chr4:18280292-18284831 REVERSE LENGTH=485;AT4G39280.1 | Symbols: | phenylalanyl-tRNA synthetase, putative / phenylalanine--tRNA ligase, putative | ch
3	3	3	3	3	3	3	3	3		AT4G39260.1;AT4G39260.3;AT4G39260.2;AT4G39260.4	AT4G39260.1;AT4G39260.3;AT4G39260.2;AT4G39260.4	AT4G39260.1 | Symbols: CCR1, ATGRP8, GR-RBP8, GRP8 | cold, circadian rhythm, and RNA binding 1 | chr4:18274166-18274958 REVERSE LENGTH=169;AT4G39260.3 | Symbols: CCR1, ATGRP8, GR-RBP8, GRP8 | cold, circadian rhythm, and RNA binding 1 | chr4:18274166-182749
3	3	3	3	3	3	3	3	3		AT4G39200.2;AT4G39200.1	AT4G39200.2;AT4G39200.1;AT2G16360.1	AT4G39200.2 | Symbols: | Ribosomal protein S25 family protein | chr4:18257464-18258464 FORWARD LENGTH=107;AT4G39200.1 | Symbols: | Ribosomal protein S25 family protein | chr4:18257464-18258464 FORWARD LENGTH=108
3	3	3	3	3	3	3	3	3		AT4G39100.2;AT4G39100.1	AT4G39100.2;AT4G39100.1	AT4G39100.2 | Symbols: SHL1 | PHD finger family protein / bromo-adjacent homology (BAH) domain-containing protein | chr4:18218712-18220134 REVERSE LENGTH=169;AT4G39100.1 | Symbols: SHL1 | PHD finger family protein / bromo-adjacent homology (BAH) domain-con
3	3	3	3	3	3	3	3	3		AT4G39090.1	AT4G39090.1	AT4G39090.1 | Symbols: RD19, RD19A | Papain family cysteine protease | chr4:18215826-18217326 REVERSE LENGTH=368
3	3	3	3	3	3	3	3	3		AT4G39080.1	AT4G39080.1	AT4G39080.1 | Symbols: VHA-A3 | vacuolar proton ATPase A3 | chr4:18209513-18214752 FORWARD LENGTH=821
3	3	3	3	3	3	3	3	3		AT4G38970.1;AT4G38970.2	AT4G38970.1;AT4G38970.2	AT4G38970.1 | Symbols: FBA2 | fructose-bisphosphate aldolase 2 | chr4:18163714-18165659 REVERSE LENGTH=398;AT4G38970.2 | Symbols: FBA2 | fructose-bisphosphate aldolase 2 | chr4:18163769-18165659 REVERSE LENGTH=381
1	2	2	3	3	3	3	3	3		AT4G38900.3;AT4G38900.2;AT4G38900.1	AT4G38900.3;AT4G38900.2;AT4G38900.1;AT2G31370.5;AT2G31370.6;AT2G31370.4;AT2G31370.3;AT2G31370.2;AT2G31370.1	AT4G38900.3 | Symbols: | Basic-leucine zipper (bZIP) transcription factor family protein | chr4:18139564-18141520 REVERSE LENGTH=547;AT4G38900.2 | Symbols: | Basic-leucine zipper (bZIP) transcription factor family protein | chr4:18139564-18141520 REVERSE
3	3	3	3	3	3	3	3	3		AT4G38740.1	AT4G38740.1	AT4G38740.1 | Symbols: ROC1 | rotamase CYP 1 | chr4:18083620-18084138 REVERSE LENGTH=172
3	3	3	3	3	3	3	3	3		AT4G38680.1	AT4G38680.1	AT4G38680.1 | Symbols: GRP2, CSDP2, CSP2, ATCSP2 | glycine rich protein 2 | chr4:18072240-18072851 REVERSE LENGTH=203
3	3	3	3	3	3	3	3	3		AT4G38630.1	AT4G38630.1	AT4G38630.1 | Symbols: RPN10, MCB1, ATMCB1, MBP1 | regulatory particle non-ATPase 10 | chr4:18057357-18059459 REVERSE LENGTH=386
2	3	3	3	3	3	3	3	3		AT4G38600.2;AT4G38600.1	AT4G38600.2;AT4G38600.1	AT4G38600.2 | Symbols: KAK, UPL3 | HEAT repeat;HECT-domain (ubiquitin-transferase) | chr4:18041503-18049073 REVERSE LENGTH=1794;AT4G38600.1 | Symbols: KAK, UPL3 | HEAT repeat;HECT-domain (ubiquitin-transferase) | chr4:18041503-18049292 REVERSE LENGTH=188
3	3	3	3	3	3	3	3	3		AT4G38580.1	AT4G38580.1	AT4G38580.1 | Symbols: ATFP6, HIPP26, FP6 | farnesylated protein 6 | chr4:18034596-18035693 FORWARD LENGTH=153
3	3	3	3	3	3	3	3	3		AT4G38470.1	AT4G38470.1	AT4G38470.1 | Symbols: | ACT-like protein tyrosine kinase family protein | chr4:17999432-18003551 FORWARD LENGTH=575
3	3	3	3	3	3	3	3	3		AT4G38370.1	AT4G38370.1	AT4G38370.1 | Symbols: | Phosphoglycerate mutase family protein | chr4:17970112-17971222 REVERSE LENGTH=225
3	3	3	3	3	3	3	3	3		AT4G38130.1;AT4G38130.2	AT4G38130.1;AT4G38130.2	AT4G38130.1 | Symbols: HD1, ATHD1, HDA1, RPD3A, HDA19, ATHDA19 | histone deacetylase 1 | chr4:17896493-17899057 REVERSE LENGTH=501;AT4G38130.2 | Symbols: HD1, ATHD1, HDA1, RPD3A, HDA19 | histone deacetylase 1 | chr4:17896663-17899057 REVERSE LENGTH=469
0	3	3	2	3	3	2	3	3		AT4G37980.1;AT4G37980.2	AT4G37980.1;AT4G37980.2;AT4G37990.1	AT4G37980.1 | Symbols: ELI3-1, ELI3, ATCAD7, CAD7 | elicitor-activated gene 3-1 | chr4:17852670-17854302 FORWARD LENGTH=357;AT4G37980.2 | Symbols: ELI3-1, ELI3, ATCAD7, CAD7 | elicitor-activated gene 3-1 | chr4:17852670-17853914 FORWARD LENGTH=298
3	3	3	3	3	3	3	3	3		AT4G37930.1	AT4G37930.1	AT4G37930.1 | Symbols: SHM1, STM, SHMT1 | serine transhydroxymethyltransferase 1 | chr4:17831891-17834742 REVERSE LENGTH=517
3	3	3	3	3	3	3	3	3		AT4G37910.1	AT4G37910.1	AT4G37910.1 | Symbols: mtHsc70-1 | mitochondrial heat shock protein 70-1 | chr4:17825368-17828099 REVERSE LENGTH=682
3	3	3	3	3	3	3	3	3		AT4G37870.1	AT4G37870.1;AT5G65690.1	AT4G37870.1 | Symbols: PCK1, PEPCK | phosphoenolpyruvate carboxykinase 1 | chr4:17802974-17806332 REVERSE LENGTH=671
3	3	3	3	3	3	3	3	3		AT4G37800.1	AT4G37800.1	AT4G37800.1 | Symbols: XTH7 | xyloglucan endotransglucosylase/hydrolase 7 | chr4:17775703-17777372 REVERSE LENGTH=293
3	3	3	3	3	3	3	3	3		AT4G37590.1	AT4G37590.1;AT2G23050.1;AT5G67440.2;AT5G10250.1;AT3G08570.1;AT2G14820.1	AT4G37590.1 | Symbols: NPY5 | Phototropic-responsive NPH3 family protein | chr4:17663080-17665299 REVERSE LENGTH=580
3	3	3	3	3	3	3	3	3		AT4G37510.1	AT4G37510.1;AT2G48121.1;AT2G48121.2	AT4G37510.1 | Symbols: | Ribonuclease III family protein | chr4:17626259-17628854 REVERSE LENGTH=537
0	1	0	0	0	3	2	2	3		AT4G37210.2;AT4G37210.1	AT4G37210.2;AT4G37210.1	AT4G37210.2 | Symbols: | Tetratricopeptide repeat (TPR)-like superfamily protein | chr4:17512376-17514072 FORWARD LENGTH=377;AT4G37210.1 | Symbols: | Tetratricopeptide repeat (TPR)-like superfamily protein | chr4:17512376-17514421 FORWARD LENGTH=492
3	3	3	3	3	3	3	3	3		AT4G37190.2;AT4G37190.1	AT4G37190.2;AT4G37190.1	AT4G37190.2 | Symbols: | LOCATED IN: cytosol, plasma membrane;EXPRESSED IN: 20 plant structures;EXPRESSED DURING: 13 growth stages;CONTAINS InterPro DOMAIN/s: Misato Segment II, myosin-like (InterPro:IPR019605), Tubulin/FtsZ, N-terminal (InterPro:IPR01
0	1	2	2	3	3	1	3	3		AT4G37120.1	AT4G37120.1	AT4G37120.1 | Symbols: SMP2 | Pre-mRNA splicing Prp18-interacting factor | chr4:17486679-17489123 FORWARD LENGTH=536
3	3	3	2	3	1	1	1	3		AT4G37070.4;AT4G37070.3;AT4G37070.1;AT4G37070.2	AT4G37070.4;AT4G37070.3;AT4G37070.1;AT4G37070.2;AT4G37060.1;AT4G37060.2	AT4G37070.4 | Symbols: PLP1, PLA IVA, AtPLAIVA | Acyl transferase/acyl hydrolase/lysophospholipase superfamily protein | chr4:17465167-17467058 REVERSE LENGTH=372;AT4G37070.3 | Symbols: PLP1, PLA IVA, AtPLAIVA | Acyl transferase/acyl hydrolase/lysophosphol
3	3	3	3	3	3	3	3	3		AT4G37000.1	AT4G37000.1	AT4G37000.1 | Symbols: ACD2, ATRCCR | accelerated cell death 2 (ACD2) | chr4:17442627-17443762 FORWARD LENGTH=319
3	3	3	3	3	3	3	3	3		AT4G36880.1	AT4G36880.1	AT4G36880.1 | Symbols: CP1 | cysteine proteinase1 | chr4:17374692-17376180 REVERSE LENGTH=376
3	3	3	3	3	3	3	3	3		AT4G36700.1	AT4G36700.1	AT4G36700.1 | Symbols: | RmlC-like cupins superfamily protein | chr4:17298443-17300337 REVERSE LENGTH=522
3	3	3	3	3	3	3	3	3		AT4G36690.4;AT4G36690.1;AT4G36690.2;AT4G36690.3	AT4G36690.4;AT4G36690.1;AT4G36690.2;AT4G36690.3	AT4G36690.4 | Symbols: ATU2AF65A | U2 snRNP auxilliary factor, large subunit, splicing factor | chr4:17294139-17297609 REVERSE LENGTH=551;AT4G36690.1 | Symbols: ATU2AF65A | U2 snRNP auxilliary factor, large subunit, splicing factor | chr4:17294139-17297609
3	3	3	3	3	3	3	3	3		AT4G36630.1	AT4G36630.1	AT4G36630.1 | Symbols: EMB2754 | Vacuolar sorting protein 39 | chr4:17272088-17276524 REVERSE LENGTH=1000
3	3	3	3	2	3	3	3	3		AT4G36480.2;AT4G36480.1	AT4G36480.2;AT4G36480.1	AT4G36480.2 | Symbols: ATLCB1, LCB1, EMB2779, FBR11 | long-chain base1 | chr4:17218598-17221124 FORWARD LENGTH=482;AT4G36480.1 | Symbols: ATLCB1, LCB1, EMB2779, FBR11 | long-chain base1 | chr4:17218598-17221124 FORWARD LENGTH=482
3	3	3	3	3	3	3	3	3		AT4G36250.1	AT4G36250.1	AT4G36250.1 | Symbols: ALDH3F1 | aldehyde dehydrogenase 3F1 | chr4:17151029-17153381 FORWARD LENGTH=484
3	3	3	3	3	3	3	3	3		AT4G36220.1	AT4G36220.1	AT4G36220.1 | Symbols: FAH1, CYP84A1 | ferulic acid 5-hydroxylase 1 | chr4:17137584-17139619 REVERSE LENGTH=520
3	3	3	3	3	3	3	3	3		AT4G36130.1	AT4G36130.1	AT4G36130.1 | Symbols: | Ribosomal protein L2 family | chr4:17097613-17098656 FORWARD LENGTH=258
3	3	3	3	3	3	3	3	3		AT4G36020.1	AT4G36020.1	AT4G36020.1 | Symbols: CSDP1 | cold shock domain protein 1 | chr4:17043443-17044342 REVERSE LENGTH=299
3	3	3	3	3	3	3	3	3		AT4G35860.1;AT4G35860.2	AT4G35860.1;AT4G35860.2;AT4G17160.1	AT4G35860.1 | Symbols: ATRABB1B, ATGB2, ATRAB2C, GB2 | GTP-binding 2 | chr4:16987118-16988839 REVERSE LENGTH=211;AT4G35860.2 | Symbols: ATRABB1B, ATGB2, ATRAB2C, GB2 | GTP-binding 2 | chr4:16987118-16988587 REVERSE LENGTH=165
3	3	3	3	3	3	3	3	3		AT4G35850.1	AT4G35850.1	AT4G35850.1 | Symbols: | Pentatricopeptide repeat (PPR) superfamily protein | chr4:16983638-16986681 FORWARD LENGTH=444
3	3	3	3	3	3	3	3	3		AT4G35830.1;AT4G35830.2	AT4G35830.1;AT4G35830.2	AT4G35830.1 | Symbols: ACO1 | aconitase 1 | chr4:16973007-16977949 REVERSE LENGTH=898;AT4G35830.2 | Symbols: ACO1 | aconitase 1 | chr4:16973007-16977278 REVERSE LENGTH=795
3	3	3	3	3	3	3	3	3		AT4G35800.1	AT4G35800.1	AT4G35800.1 | Symbols: NRPB1, RPB1, RNA_POL_II_LSRNA_POL_II_LS, RNA_POL_II_LS | RNA polymerase II large subunit | chr4:16961115-16967892 REVERSE LENGTH=1839
3	3	3	3	3	3	3	3	3		AT4G35790.2;AT4G35790.1;AT4G35790.3	AT4G35790.2;AT4G35790.1;AT4G35790.3	AT4G35790.2 | Symbols: ATPLDDELTA, PLDDELTA | phospholipase D delta | chr4:16955774-16959875 REVERSE LENGTH=857;AT4G35790.1 | Symbols: ATPLDDELTA, PLDDELTA | phospholipase D delta | chr4:16955774-16959875 REVERSE LENGTH=868;AT4G35790.3 | Symbols: ATPLDDELT
3	3	3	3	3	3	3	3	3		AT4G35785.3;AT4G35785.2;AT4G35785.4;AT4G35785.1;AT4G35785.5	AT4G35785.3;AT4G35785.2;AT4G35785.4;AT4G35785.1;AT4G35785.5	AT4G35785.3 | Symbols: | RNA-binding (RRM/RBD/RNP motifs) family protein | chr4:16953708-16955127 REVERSE LENGTH=207;AT4G35785.2 | Symbols: | RNA-binding (RRM/RBD/RNP motifs) family protein | chr4:16953211-16955127 REVERSE LENGTH=239;AT4G35785.4 | Symbol
3	3	3	3	3	3	3	3	3		AT4G35780.1	AT4G35780.1	AT4G35780.1 | Symbols: | ACT-like protein tyrosine kinase family protein | chr4:16946729-16950405 REVERSE LENGTH=570
3	3	3	3	3	3	3	3	3		AT4G35770.2;AT4G35770.3;AT4G35770.1	AT4G35770.2;AT4G35770.3;AT4G35770.1	AT4G35770.2 | Symbols: SEN1, ATSEN1, DIN1 | Rhodanese/Cell cycle control phosphatase superfamily protein | chr4:16945073-16945840 FORWARD LENGTH=161;AT4G35770.3 | Symbols: SEN1, ATSEN1, DIN1 | Rhodanese/Cell cycle control phosphatase superfamily protein |
3	3	3	3	3	3	3	3	3		AT4G35630.1	AT4G35630.1	AT4G35630.1 | Symbols: PSAT | phosphoserine aminotransferase | chr4:16904205-16905497 FORWARD LENGTH=430
3	3	3	3	3	3	3	3	3		AT4G35450.3;AT4G35450.2;AT4G35450.1;AT4G35450.5;AT4G35450.4	AT4G35450.3;AT4G35450.2;AT4G35450.1;AT4G35450.5;AT4G35450.4	AT4G35450.3 | Symbols: AKR2, AFT, AKR2A | ankyrin repeat-containing protein 2 | chr4:16839862-16841759 FORWARD LENGTH=342;AT4G35450.2 | Symbols: AKR2, AFT, AKR2A | ankyrin repeat-containing protein 2 | chr4:16839862-16841759 FORWARD LENGTH=342;AT4G35450.1
3	3	3	3	3	3	3	3	3		AT4G35250.1	AT4G35250.1	AT4G35250.1 | Symbols: | NAD(P)-binding Rossmann-fold superfamily protein | chr4:16771401-16773269 REVERSE LENGTH=395
3	3	3	3	3	3	3	3	3		AT4G35230.1	AT4G35230.1	AT4G35230.1 | Symbols: BSK1 | BR-signaling kinase 1 | chr4:16755325-16758041 REVERSE LENGTH=512
3	3	3	3	3	3	3	3	3		AT4G35100.2;AT4G35100.1	AT4G35100.2;AT4G35100.1	AT4G35100.2 | Symbols: PIP3 | plasma membrane intrinsic protein 3 | chr4:16708672-16709958 FORWARD LENGTH=280;AT4G35100.1 | Symbols: PIP3, PIP3A, PIP2;7, SIMIP | plasma membrane intrinsic protein 3 | chr4:16708672-16709958 FORWARD LENGTH=280
3	3	3	3	3	3	3	3	3		AT4G35090.1;AT4G35090.2	AT4G35090.1;AT4G35090.2	AT4G35090.1 | Symbols: CAT2 | catalase 2 | chr4:16700937-16703215 REVERSE LENGTH=492;AT4G35090.2 | Symbols: CAT2 | catalase 2 | chr4:16701105-16703215 REVERSE LENGTH=474
3	3	3	3	3	3	3	3	3		AT4G35060.1	AT4G35060.1	AT4G35060.1 | Symbols: HIPP25 | Heavy metal transport/detoxification superfamily protein | chr4:16685874-16686419 REVERSE LENGTH=153
3	3	3	3	3	3	3	3	3		AT4G34870.1	AT4G34870.1;AT3G56070.2;AT3G56070.1	AT4G34870.1 | Symbols: ROC5, ATCYP1 | rotamase cyclophilin 5 | chr4:16614451-16614969 FORWARD LENGTH=172
3	3	3	3	3	3	3	3	3		AT4G34830.1	AT4G34830.1	AT4G34830.1 | Symbols: MRL1 | Pentatricopeptide repeat (PPR) superfamily protein | chr4:16599976-16605994 REVERSE LENGTH=1089
3	3	3	3	3	3	3	3	3		AT4G34740.1	AT4G34740.1	AT4G34740.1 | Symbols: ATASE2, CIA1, ATPURF2, ASE2 | GLN phosphoribosyl pyrophosphate amidotransferase 2 | chr4:16574894-16576579 REVERSE LENGTH=561
3	3	3	3	3	3	3	3	3		AT4G34670.1	AT4G34670.1	AT4G34670.1 | Symbols: | Ribosomal protein S3Ae | chr4:16548724-16550222 FORWARD LENGTH=262
3	3	3	3	3	3	3	3	3		AT4G34660.1;AT4G34660.3;AT4G34660.2	AT4G34660.1;AT4G34660.3;AT4G34660.2	AT4G34660.1 | Symbols: | SH3 domain-containing protein | chr4:16545595-16548294 REVERSE LENGTH=368;AT4G34660.3 | Symbols: | SH3 domain-containing protein | chr4:16545595-16548294 REVERSE LENGTH=317;AT4G34660.2 | Symbols: | SH3 domain-containing protein
3	3	3	3	3	3	3	3	3		AT4G34620.1	AT4G34620.1	AT4G34620.1 | Symbols: SSR16 | small subunit ribosomal protein 16 | chr4:16535084-16536092 REVERSE LENGTH=113
2	3	3	3	3	3	3	2	3		AT4G34490.1	AT4G34490.1	AT4G34490.1 | Symbols: ATCAP1, CAP 1, CAP1 | cyclase associated protein 1 | chr4:16484896-16487355 REVERSE LENGTH=476
3	3	3	3	3	3	3	3	3		AT4G34460.3;AT4G34460.1;AT4G34460.4	AT4G34460.3;AT4G34460.1;AT4G34460.4	AT4G34460.3 | Symbols: AGB1, ELK4, ATAGB1 | GTP binding protein beta 1 | chr4:16477586-16479266 REVERSE LENGTH=347;AT4G34460.1 | Symbols: AGB1, ELK4, ATAGB1 | GTP binding protein beta 1 | chr4:16477393-16479266 REVERSE LENGTH=377;AT4G34460.4 | Symbols: AGB
3	3	3	3	3	3	3	3	3		AT4G34450.1	AT4G34450.1	AT4G34450.1 | Symbols: | coatomer gamma-2 subunit, putative / gamma-2 coat protein, putative / gamma-2 COP, putative | chr4:16471956-16476795 FORWARD LENGTH=886
0	0	1	1	2	3	3	3	3		AT4G34430.3;AT4G34430.2;AT4G34430.1;AT4G34430.4	AT4G34430.3;AT4G34430.2;AT4G34430.1;AT4G34430.4	AT4G34430.3 | Symbols: CHB3, ATSWI3D | DNA-binding family protein | chr4:16461069-16464993 FORWARD LENGTH=983;AT4G34430.2 | Symbols: CHB3, ATSWI3D | DNA-binding family protein | chr4:16461069-16464993 FORWARD LENGTH=985;AT4G34430.1 | Symbols: CHB3, ATSWI3D
1	3	1	2	3	3	2	3	3		AT4G34270.1	AT4G34270.1	AT4G34270.1 | Symbols: | TIP41-like family protein | chr4:16404138-16406153 REVERSE LENGTH=290
3	3	3	3	3	3	3	3	3		AT4G34200.1	AT4G34200.1;AT1G17745.1	AT4G34200.1 | Symbols: EDA9 | D-3-phosphoglycerate dehydrogenase | chr4:16374041-16376561 REVERSE LENGTH=603
3	3	3	3	3	3	3	3	3		AT4G34110.1	AT4G34110.1	AT4G34110.1 | Symbols: PAB2, PABP2, ATPAB2 | poly(A) binding protein 2 | chr4:16336732-16339892 FORWARD LENGTH=629
3	3	3	3	3	3	3	3	3		AT4G34090.1;AT4G34090.3;AT4G34090.2	AT4G34090.1;AT4G34090.3;AT4G34090.2	AT4G34090.1 | Symbols: | unknown protein;FUNCTIONS IN: molecular_function unknown;INVOLVED IN: biological_process unknown;LOCATED IN: chloroplast, chloroplast stroma;EXPRESSED IN: 22 plant structures;EXPRESSED DURING: 13 growth stages;BEST Arabidops
3	3	3	2	3	3	3	3	3		AT4G34050.1;AT4G34050.2	AT4G34050.1;AT4G34050.2	AT4G34050.1 | Symbols: CCoAOMT1 | S-adenosyl-L-methionine-dependent methyltransferases superfamily protein | chr4:16310844-16311973 FORWARD LENGTH=259;AT4G34050.2 | Symbols: CCoAOMT1 | S-adenosyl-L-methionine-dependent methyltransferases superfamily protei
2	3	3	3	3	3	3	3	3		AT4G34020.2;AT4G34020.1	AT4G34020.2;AT4G34020.1	AT4G34020.2 | Symbols: | Class I glutamine amidotransferase-like superfamily protein | chr4:16298553-16300897 REVERSE LENGTH=437;AT4G34020.1 | Symbols: | Class I glutamine amidotransferase-like superfamily protein | chr4:16298553-16300897 REVERSE LENGTH=
3	3	3	3	3	3	3	3	3		AT4G33945.1	AT4G33945.1	AT4G33945.1 | Symbols: | ARM repeat superfamily protein | chr4:16268119-16270514 FORWARD LENGTH=464
2	3	3	3	3	3	3	3	3		AT4G33865.1;AT3G44010.1;AT3G43980.1	AT4G33865.1;AT3G44010.1;AT3G43980.1	AT4G33865.1 | Symbols: | Ribosomal protein S14p/S29e family protein | chr4:16233395-16234114 REVERSE LENGTH=56;AT3G44010.1 | Symbols: | Ribosomal protein S14p/S29e family protein | chr3:15800175-15801132 REVERSE LENGTH=56;AT3G43980.1 | Symbols: | Riboso
3	3	3	3	3	3	3	3	3		AT4G33760.1	AT4G33760.1	AT4G33760.1 | Symbols: | tRNA synthetase class II (D, K and N) family protein | chr4:16189285-16193260 REVERSE LENGTH=664
3	3	3	3	3	3	3	3	3		AT4G33650.1;AT4G33650.2	AT4G33650.1;AT4G33650.2	AT4G33650.1 | Symbols: ADL2, DRP3A | dynamin-related protein 3A | chr4:16161073-16166587 FORWARD LENGTH=808;AT4G33650.2 | Symbols: DRP3A | dynamin-related protein 3A | chr4:16161073-16166587 FORWARD LENGTH=809
2	3	3	3	3	3	3	3	3		AT4G33580.1;AT4G33580.2	AT4G33580.1;AT4G33580.2	AT4G33580.1 | Symbols: ATBCA5, BCA5 | beta carbonic anhydrase 5 | chr4:16139406-16141363 FORWARD LENGTH=301;AT4G33580.2 | Symbols: ATBCA5, BCA5 | beta carbonic anhydrase 5 | chr4:16139406-16141363 FORWARD LENGTH=302
3	3	3	3	3	3	3	3	3		AT4G33510.1;AT4G33510.2	AT4G33510.1;AT4G33510.2	AT4G33510.1 | Symbols: DHS2 | 3-deoxy-d-arabino-heptulosonate 7-phosphate synthase | chr4:16116496-16118549 FORWARD LENGTH=507;AT4G33510.2 | Symbols: DHS2 | 3-deoxy-d-arabino-heptulosonate 7-phosphate synthase | chr4:16116496-16118233 FORWARD LENGTH=432
3	3	3	2	3	3	3	3	3		AT4G33360.1;AT4G33360.2;AT4G33360.3	AT4G33360.1;AT4G33360.2;AT4G33360.3	AT4G33360.1 | Symbols: FLDH | NAD(P)-binding Rossmann-fold superfamily protein | chr4:16067989-16069374 REVERSE LENGTH=344;AT4G33360.2 | Symbols: FLDH | NAD(P)-binding Rossmann-fold superfamily protein | chr4:16068123-16069374 REVERSE LENGTH=305;AT4G33360.
3	3	3	3	3	3	3	3	3		AT4G33350.1;AT4G33350.2	AT4G33350.1;AT4G33350.2	AT4G33350.1 | Symbols: | Tic22-like family protein | chr4:16064638-16066715 REVERSE LENGTH=268;AT4G33350.2 | Symbols: | Tic22-like family protein | chr4:16064638-16066715 REVERSE LENGTH=242
3	3	3	3	3	3	3	3	3		AT4G33200.3;AT4G33200.1;AT4G33200.2	AT4G33200.3;AT4G33200.1;AT4G33200.2	AT4G33200.3 | Symbols: XI-I | myosin, putative | chr4:16002768-16014792 REVERSE LENGTH=1503;AT4G33200.1 | Symbols: XI-I, ATXI-I, XI-15 | myosin, putative | chr4:16002768-16014792 REVERSE LENGTH=1522;AT4G33200.2 | Symbols: XI-I | myosin, putative | chr4:160
3	3	3	3	3	3	3	3	3		AT4G33090.1	AT4G33090.1	AT4G33090.1 | Symbols: APM1, ATAPM1 | aminopeptidase M1 | chr4:15965915-15970418 REVERSE LENGTH=879
3	3	3	3	3	3	3	3	3		AT4G33030.1	AT4G33030.1	AT4G33030.1 | Symbols: SQD1 | sulfoquinovosyldiacylglycerol 1 | chr4:15936051-15937566 FORWARD LENGTH=477
3	3	3	3	3	3	3	3	3		AT4G33010.1;AT4G33010.2	AT4G33010.1;AT4G33010.2	AT4G33010.1 | Symbols: AtGLDP1, GLDP1 | glycine decarboxylase P-protein 1 | chr4:15926852-15931150 REVERSE LENGTH=1037;AT4G33010.2 | Symbols: AtGLDP1, GLDP1 | glycine decarboxylase P-protein 1 | chr4:15927133-15931150 REVERSE LENGTH=976
3	3	3	3	3	3	3	3	3		AT4G32720.2;AT4G32720.1	AT4G32720.2;AT4G32720.1	AT4G32720.2 | Symbols: AtLa1, La1 | La protein 1 | chr4:15787313-15789498 FORWARD LENGTH=404;AT4G32720.1 | Symbols: AtLa1, La1 | La protein 1 | chr4:15787313-15789683 FORWARD LENGTH=433
2	2	1	2	3	3	3	3	3		AT4G32620.1;AT4G32620.2	AT4G32620.1;AT4G32620.2	AT4G32620.1 | Symbols: | Enhancer of polycomb-like transcription factor protein | chr4:15731968-15737222 FORWARD LENGTH=1539;AT4G32620.2 | Symbols: | Enhancer of polycomb-like transcription factor protein | chr4:15731968-15737222 FORWARD LENGTH=1540
0	2	3	3	3	3	3	3	3		AT4G32551.1;AT4G32551.2	AT4G32551.1;AT4G32551.2	AT4G32551.1 | Symbols: LUG, RON2 | LisH dimerisation motif;WD40/YVTN repeat-like-containing domain | chr4:15707863-15713359 FORWARD LENGTH=931;AT4G32551.2 | Symbols: LUG | LisH dimerisation motif;WD40/YVTN repeat-like-containing domain | chr4:15707863-1571
3	3	3	3	3	3	3	3	3		AT4G32520.2;AT4G32520.1	AT4G32520.2;AT4G32520.1	AT4G32520.2 | Symbols: SHM3 | serine hydroxymethyltransferase 3 | chr4:15689642-15692334 REVERSE LENGTH=529;AT4G32520.1 | Symbols: SHM3, AtSHMT3 | serine hydroxymethyltransferase 3 | chr4:15689642-15692334 REVERSE LENGTH=529
3	3	3	3	3	3	3	3	3		AT4G32460.2;AT4G32460.1	AT4G32460.2;AT4G32460.1	AT4G32460.2 | Symbols: | Protein of unknown function, DUF642 | chr4:15663036-15664859 REVERSE LENGTH=365;AT4G32460.1 | Symbols: | Protein of unknown function, DUF642 | chr4:15663036-15664859 REVERSE LENGTH=365
3	3	3	3	3	3	3	3	3		AT4G32420.3;AT4G32420.1;AT4G32420.4;AT4G32420.2	AT4G32420.3;AT4G32420.1;AT4G32420.4;AT4G32420.2	AT4G32420.3 | Symbols: | Cyclophilin-like peptidyl-prolyl cis-trans isomerase family protein | chr4:15647550-15652103 REVERSE LENGTH=837;AT4G32420.1 | Symbols: | Cyclophilin-like peptidyl-prolyl cis-trans isomerase family protein | chr4:15647550-15652103
3	3	3	3	3	3	3	3	3		AT4G32410.1;AT2G25540.1	AT4G32410.1;AT2G25540.1	AT4G32410.1 | Symbols: CESA1, RSW1, AtCESA1 | cellulose synthase 1 | chr4:15641009-15646388 REVERSE LENGTH=1081;AT2G25540.1 | Symbols: CESA10 | cellulose synthase 10 | chr2:10867070-10872077 REVERSE LENGTH=1065
3	3	3	3	3	3	3	3	3		AT4G32400.1	AT4G32400.1	AT4G32400.1 | Symbols: EMB104, SHS1, EMB42, ATBT1 | Mitochondrial substrate carrier family protein | chr4:15638686-15640238 FORWARD LENGTH=392
3	3	3	3	3	3	3	3	3		AT4G32285.2;AT4G32285.1	AT4G32285.2;AT4G32285.1	AT4G32285.2 | Symbols: | ENTH/ANTH/VHS superfamily protein | chr4:15586003-15587910 FORWARD LENGTH=635;AT4G32285.1 | Symbols: | ENTH/ANTH/VHS superfamily protein | chr4:15586003-15587910 FORWARD LENGTH=635
3	3	3	3	3	3	3	3	3		AT4G32260.1	AT4G32260.1	AT4G32260.1 | Symbols: | ATPase, F0 complex, subunit B/B, bacterial/chloroplast | chr4:15573859-15574586 REVERSE LENGTH=219
3	3	3	3	3	3	3	3	3		AT4G32180.1;AT4G32180.3;AT4G32180.2	AT4G32180.1;AT4G32180.3;AT4G32180.2	AT4G32180.1 | Symbols: ATPANK2, PANK2 | pantothenate kinase 2 | chr4:15537724-15543715 REVERSE LENGTH=901;AT4G32180.3 | Symbols: ATPANK2, PANK2 | pantothenate kinase 2 | chr4:15538340-15543715 REVERSE LENGTH=783;AT4G32180.2 | Symbols: ATPANK2, PANK2 | pant
3	3	3	3	3	3	3	3	3		AT4G32150.1	AT4G32150.1;AT2G25340.1;AT5G16000.1	AT4G32150.1 | Symbols: VAMP711, ATVAMP711 | vesicle-associated membrane protein 711 | chr4:15526407-15527651 REVERSE LENGTH=219
3	3	3	3	3	3	3	3	3		AT4G31990.4;AT4G31990.2;AT4G31990.1;AT4G31990.3	AT4G31990.4;AT4G31990.2;AT4G31990.1;AT4G31990.3	AT4G31990.4 | Symbols: ASP5 | aspartate aminotransferase 5 | chr4:15471074-15473521 REVERSE LENGTH=448;AT4G31990.2 | Symbols: ASP5, AAT3, ATAAT1 | aspartate aminotransferase 5 | chr4:15471074-15473521 REVERSE LENGTH=453;AT4G31990.1 | Symbols: ASP5, AAT3, A
3	3	3	3	3	3	3	3	3		AT4G31880.2;AT4G31880.1	AT4G31880.2;AT4G31880.1	AT4G31880.2 | Symbols: | LOCATED IN: cytosol;EXPRESSED IN: 24 plant structures;EXPRESSED DURING: 14 growth stages;BEST Arabidopsis thaliana protein match is: Tudor/PWWP/MBT superfamily protein (TAIR:AT1G15940.1). | chr4:15419435-15423939 REVERSE LENGTH
3	3	3	3	3	3	3	3	3		AT4G31850.1	AT4G31850.1	AT4G31850.1 | Symbols: PGR3 | proton gradient regulation 3 | chr4:15403020-15406358 FORWARD LENGTH=1112
3	3	3	3	3	3	3	3	3		AT4G31700.1;AT4G31700.2	AT4G31700.1;AT4G31700.2	AT4G31700.1 | Symbols: RPS6, RPS6A | ribosomal protein S6 | chr4:15346306-15347714 REVERSE LENGTH=250;AT4G31700.2 | Symbols: RPS6, RPS6A | ribosomal protein S6 | chr4:15346306-15347075 REVERSE LENGTH=188
3	3	3	3	3	3	3	3	3		AT4G31580.2;AT4G31580.1	AT4G31580.2;AT4G31580.1	AT4G31580.2 | Symbols: SRZ-22, SRZ22, RSZP22, RSZ22, At-RSZ22 | serine/arginine-rich 22 | chr4:15306983-15308064 FORWARD LENGTH=200;AT4G31580.1 | Symbols: SRZ-22, SRZ22, RSZP22, RSZ22, At-RSZ22 | serine/arginine-rich 22 | chr4:15306983-15308064 FORWARD LEN
3	3	3	3	3	3	3	3	3		AT4G31480.2;AT4G31480.1	AT4G31480.2;AT4G31480.1	AT4G31480.2 | Symbols: | Coatomer, beta subunit | chr4:15264145-15267384 FORWARD LENGTH=948;AT4G31480.1 | Symbols: | Coatomer, beta subunit | chr4:15264145-15267384 FORWARD LENGTH=948
2	1	3	1	3	2	3	3	3		AT4G31430.3;AT4G31430.1;AT4G31430.2	AT4G31430.3;AT4G31430.1;AT4G31430.2	AT4G31430.3 | Symbols: | unknown protein;LOCATED IN: plasma membrane;EXPRESSED IN: 25 plant structures;EXPRESSED DURING: 15 growth stages;Has 35333 Blast hits to 34131 proteins in 2444 species: Archae - 798;Bacteria - 22429;Metazoa - 974;Fungi - 99
3	3	3	3	3	3	3	2	3		AT4G31340.2;AT4G31340.1	AT4G31340.2;AT4G31340.1	AT4G31340.2 | Symbols: | myosin heavy chain-related | chr4:15205662-15208895 FORWARD LENGTH=420;AT4G31340.1 | Symbols: | myosin heavy chain-related | chr4:15205662-15208950 FORWARD LENGTH=437
3	3	3	3	3	3	3	3	3		AT4G31300.3;AT4G31300.1;AT4G31300.2	AT4G31300.3;AT4G31300.1;AT4G31300.2	AT4G31300.3 | Symbols: PBA1 | N-terminal nucleophile aminohydrolases (Ntn hydrolases) superfamily protein | chr4:15188927-15190935 FORWARD LENGTH=233;AT4G31300.1 | Symbols: PBA1 | N-terminal nucleophile aminohydrolases (Ntn hydrolases) superfamily protein
3	3	3	3	3	3	3	3	3		AT4G31210.1	AT4G31210.1	AT4G31210.1 | Symbols: | DNA topoisomerase, type IA, core | chr4:15165280-15172534 FORWARD LENGTH=1284
3	3	3	3	3	3	3	3	3		AT4G31180.2;AT4G31180.1	AT4G31180.2;AT4G31180.1	AT4G31180.2 | Symbols: | Class II aminoacyl-tRNA and biotin synthetases superfamily protein | chr4:15156696-15159362 FORWARD LENGTH=558;AT4G31180.1 | Symbols: | Class II aminoacyl-tRNA and biotin synthetases superfamily protein | chr4:15156696-15159362 F
2	2	3	2	3	3	3	3	3		AT4G31160.1	AT4G31160.1	AT4G31160.1 | Symbols: DCAF1 | DDB1-CUL4 associated factor 1 | chr4:15145936-15152939 FORWARD LENGTH=1883
3	3	3	3	3	3	3	3	3		AT4G31120.2;AT4G31120.1	AT4G31120.2;AT4G31120.1	AT4G31120.2 | Symbols: PRMT5 | SHK1 binding protein 1 | chr4:15132538-15136568 REVERSE LENGTH=584;AT4G31120.1 | Symbols: SKB1, ATPRMT5 | SHK1 binding protein 1 | chr4:15132185-15136568 REVERSE LENGTH=642
3	3	3	3	3	3	3	3	3		AT4G30990.1;AT4G30990.2	AT4G30990.1;AT4G30990.2	AT4G30990.1 | Symbols: | ARM repeat superfamily protein | chr4:15084456-15097860 FORWARD LENGTH=2599;AT4G30990.2 | Symbols: | ARM repeat superfamily protein | chr4:15084456-15097860 FORWARD LENGTH=2620
3	3	3	3	3	3	3	3	3		AT4G30950.1	AT4G30950.1	AT4G30950.1 | Symbols: FAD6, FADC, SFD4 | fatty acid desaturase 6 | chr4:15057278-15059673 REVERSE LENGTH=448
3	3	3	3	3	3	3	3	3		AT4G30920.1	AT4G30920.1;AT4G30910.1	AT4G30920.1 | Symbols: | Cytosol aminopeptidase family protein | chr4:15046589-15049304 REVERSE LENGTH=583
2	3	3	2	3	3	3	3	3		AT4G30890.3;AT4G30890.2;AT4G30890.1	AT4G30890.3;AT4G30890.2;AT4G30890.1	AT4G30890.3 | Symbols: UBP24 | ubiquitin-specific protease 24 | chr4:15036383-15038825 REVERSE LENGTH=551;AT4G30890.2 | Symbols: UBP24 | ubiquitin-specific protease 24 | chr4:15036383-15038825 REVERSE LENGTH=551;AT4G30890.1 | Symbols: UBP24 | ubiquitin-spe
0	0	2	1	2	3	3	3	3		AT4G30810.1	AT4G30810.1	AT4G30810.1 | Symbols: scpl29 | serine carboxypeptidase-like 29 | chr4:15003474-15006017 FORWARD LENGTH=479
3	3	3	3	3	3	3	3	3		AT4G30800.1	AT4G30800.1	AT4G30800.1 | Symbols: | Nucleic acid-binding, OB-fold-like protein | chr4:15001216-15002392 FORWARD LENGTH=159
3	3	3	2	3	3	3	3	3		AT4G30720.1	AT4G30720.1	AT4G30720.1 | Symbols: | FAD/NAD(P)-binding oxidoreductase family protein | chr4:14972212-14975461 REVERSE LENGTH=707
3	2	3	2	3	2	3	2	2		AT4G30530.1	AT4G30530.1;AT4G30550.1	AT4G30530.1 | Symbols: | Class I glutamine amidotransferase-like superfamily protein | chr4:14920605-14922286 FORWARD LENGTH=250
3	3	3	3	3	3	3	3	3		AT4G30270.1	AT4G30270.1;AT2G18800.1	AT4G30270.1 | Symbols: MERI5B, MERI-5, XTH24, SEN4 | xyloglucan endotransglucosylase/hydrolase 24 | chr4:14819445-14820448 REVERSE LENGTH=269
3	3	3	3	3	3	3	3	3		AT4G30190.1;AT4G30190.2	AT4G30190.1;AT4G30190.2;AT2G07560.1;AT2G24520.1;AT1G17260.1	AT4G30190.1 | Symbols: AHA2, PMA2, HA2 | H(+)-ATPase 2 | chr4:14770820-14775920 REVERSE LENGTH=948;AT4G30190.2 | Symbols: HA2 | H(+)-ATPase 2 | chr4:14770820-14775920 REVERSE LENGTH=981
3	3	3	3	3	3	3	3	3		AT4G30170.1	AT4G30170.1	AT4G30170.1 | Symbols: | Peroxidase family protein | chr4:14762922-14764482 FORWARD LENGTH=325
3	3	3	3	3	3	3	3	3		AT4G30160.1;AT4G30160.2	AT4G30160.1;AT4G30160.2	AT4G30160.1 | Symbols: VLN4, ATVLN4 | villin 4 | chr4:14754528-14759511 FORWARD LENGTH=974;AT4G30160.2 | Symbols: VLN4 | villin 4 | chr4:14754528-14759511 FORWARD LENGTH=983
3	3	3	3	3	3	3	3	3		AT4G30010.1	AT4G30010.1	AT4G30010.1 | Symbols: | unknown protein;FUNCTIONS IN: molecular_function unknown;INVOLVED IN: biological_process unknown;LOCATED IN: mitochondrion, plastid;EXPRESSED IN: 26 plant structures;EXPRESSED DURING: 15 growth stages;Has 39 Blast hits to 39
3	3	3	2	3	3	2	3	3		AT4G30000.1;AT4G30000.2	AT4G30000.1;AT4G30000.2	AT4G30000.1 | Symbols: | Dihydropterin pyrophosphokinase / Dihydropteroate synthase | chr4:14670524-14672397 REVERSE LENGTH=554;AT4G30000.2 | Symbols: | Dihydropterin pyrophosphokinase / Dihydropteroate synthase | chr4:14670417-14672397 REVERSE LENGTH=56
3	3	3	3	3	3	3	3	3		AT4G29900.1	AT4G29900.1	AT4G29900.1 | Symbols: ACA10, CIF1, ATACA10 | autoinhibited Ca(2+)-ATPase 10 | chr4:14611225-14618775 REVERSE LENGTH=1069
3	3	3	3	3	3	3	3	3		AT4G29840.1	AT4G29840.1;AT1G72810.1	AT4G29840.1 | Symbols: MTO2, TS | Pyridoxal-5-phosphate-dependent enzyme family protein | chr4:14599434-14601014 REVERSE LENGTH=526
3	3	3	3	3	3	3	3	3		AT4G29810.1;AT4G26070.1;AT4G29810.3;AT4G26070.3;AT4G26070.2;AT4G29810.2	AT4G29810.1;AT4G26070.1;AT4G29810.3;AT4G26070.3;AT4G26070.2;AT4G29810.2	AT4G29810.1 | Symbols: ATMKK2, MKK2, MK1 | MAP kinase kinase 2 | chr4:14593299-14595241 REVERSE LENGTH=363;AT4G26070.1 | Symbols: MEK1, NMAPKK, ATMEK1, MKK1 | MAP kinase/ ERK kinase 1 | chr4:13217797-13219381 FORWARD LENGTH=308;AT4G29810.3 | Symbols: ATMKK
3	3	3	2	2	3	3	3	3		AT4G29680.1	AT4G29680.1	AT4G29680.1 | Symbols: | Alkaline-phosphatase-like family protein | chr4:14538067-14539557 REVERSE LENGTH=496
2	3	3	2	3	3	2	2	2		AT4G29510.1	AT4G29510.1	AT4G29510.1 | Symbols: ATPRMT11, PRMT11, ATPRMT1B, PRMT1B | arginine methyltransferase 11 | chr4:14491739-14493752 FORWARD LENGTH=390
3	3	3	3	3	3	3	3	3		AT4G29410.2;AT4G29410.1	AT4G29410.2;AT4G29410.1	AT4G29410.2 | Symbols: | Ribosomal L28e protein family | chr4:14468439-14469964 REVERSE LENGTH=143;AT4G29410.1 | Symbols: | Ribosomal L28e protein family | chr4:14468439-14469964 REVERSE LENGTH=143
3	3	3	3	3	3	3	3	3		AT4G29380.1	AT4G29380.1	AT4G29380.1 | Symbols: | protein kinase family protein / WD-40 repeat family protein | chr4:14458822-14464692 FORWARD LENGTH=1494
3	3	3	3	3	3	3	3	3		AT4G29220.1	AT4G29220.1	AT4G29220.1 | Symbols: PFK1 | phosphofructokinase 1 | chr4:14403621-14406071 REVERSE LENGTH=473
3	3	3	3	3	3	3	3	3		AT4G29130.1	AT4G29130.1;AT2G19860.2;AT2G19860.1	AT4G29130.1 | Symbols: ATHXK1, GIN2, HXK1 | hexokinase 1 | chr4:14352338-14354865 REVERSE LENGTH=496
2	2	2	1	2	3	3	2	3		AT4G29120.1	AT4G29120.1	AT4G29120.1 | Symbols: | 6-phosphogluconate dehydrogenase family protein | chr4:14350861-14351865 FORWARD LENGTH=334
3	3	3	3	3	3	3	3	3		AT4G29060.1;AT4G29060.2	AT4G29060.1;AT4G29060.2	AT4G29060.1 | Symbols: emb2726 | elongation factor Ts family protein | chr4:14317744-14321315 FORWARD LENGTH=953;AT4G29060.2 | Symbols: emb2726 | elongation factor Ts family protein | chr4:14317744-14321315 FORWARD LENGTH=709
3	3	3	3	3	3	3	3	3		AT4G29010.1	AT4G29010.1	AT4G29010.1 | Symbols: AIM1 | Enoyl-CoA hydratase/isomerase family | chr4:14297312-14302016 REVERSE LENGTH=721
3	3	3	3	3	3	3	3	3		AT4G28990.1;AT4G28990.2	AT4G28990.1;AT4G28990.2	AT4G28990.1 | Symbols: | RNA-binding protein-related | chr4:14291205-14293018 FORWARD LENGTH=347;AT4G28990.2 | Symbols: | RNA-binding protein-related | chr4:14291205-14293018 FORWARD LENGTH=395
3	3	3	3	3	3	3	3	3		AT4G28750.1	AT4G28750.1	AT4G28750.1 | Symbols: PSAE-1 | Photosystem I reaction centre subunit IV / PsaE protein | chr4:14202951-14203888 REVERSE LENGTH=143
3	3	3	3	3	3	3	3	3		AT4G28710.1	AT4G28710.1	AT4G28710.1 | Symbols: XIH, ATXIH | Myosin family protein with Dil domain | chr4:14172280-14181771 FORWARD LENGTH=1516
3	3	3	3	3	3	3	3	3		AT4G28520.1;AT4G28520.3;AT4G28520.2;AT4G28520.4	AT4G28520.1;AT4G28520.3;AT4G28520.2;AT4G28520.4	AT4G28520.1 | Symbols: CRU3, CRC | cruciferin 3 | chr4:14087596-14089617 FORWARD LENGTH=524;AT4G28520.3 | Symbols: CRU3, CRC | cruciferin 3 | chr4:14087596-14089617 FORWARD LENGTH=453;AT4G28520.2 | Symbols: CRU3, CRC | cruciferin 3 | chr4:14087596-14089229
3	3	3	3	3	3	3	3	3		AT4G28450.1	AT4G28450.1	AT4G28450.1 | Symbols: | nucleotide binding;protein binding | chr4:14061724-14064582 REVERSE LENGTH=452
3	3	3	3	3	3	3	3	3		AT4G28440.1	AT4G28440.1	AT4G28440.1 | Symbols: | Nucleic acid-binding, OB-fold-like protein | chr4:14060054-14060970 FORWARD LENGTH=153
3	3	2	3	3	3	3	3	2		AT4G28300.2;AT4G28300.1	AT4G28300.2;AT4G28300.1	AT4G28300.2 | Symbols: | Protein of unknown function (DUF1421) | chr4:14015414-14016823 FORWARD LENGTH=438;AT4G28300.1 | Symbols: | Protein of unknown function (DUF1421) | chr4:14014860-14016823 FORWARD LENGTH=496
3	3	3	3	3	3	3	3	3		AT4G28200.1	AT4G28200.1	AT4G28200.1 | Symbols: | FUNCTIONS IN: molecular_function unknown;INVOLVED IN: RNA processing;LOCATED IN: intracellular;EXPRESSED IN: 22 plant structures;EXPRESSED DURING: 13 growth stages;CONTAINS InterPro DOMAIN/s: RNA-processing protein, HAT helix
3	3	3	3	3	3	3	3	3		AT4G28080.1	AT4G28080.1	AT4G28080.1 | Symbols: | Tetratricopeptide repeat (TPR)-like superfamily protein | chr4:13948993-13957840 REVERSE LENGTH=1819
3	3	3	3	3	3	2	3	2		AT4G28030.2;AT4G28030.1	AT4G28030.2;AT4G28030.1	AT4G28030.2 | Symbols: | Acyl-CoA N-acyltransferases (NAT) superfamily protein | chr4:13937748-13939131 REVERSE LENGTH=263;AT4G28030.1 | Symbols: | Acyl-CoA N-acyltransferases (NAT) superfamily protein | chr4:13937748-13939131 REVERSE LENGTH=274
3	3	3	3	3	3	3	3	3		AT4G27700.1	AT4G27700.1	AT4G27700.1 | Symbols: | Rhodanese/Cell cycle control phosphatase superfamily protein | chr4:13826541-13827673 REVERSE LENGTH=224
3	3	3	3	3	3	3	3	3		AT4G27690.2;AT4G27690.1	AT4G27690.2;AT4G27690.1	AT4G27690.2 | Symbols: VPS26B | vacuolar protein sorting 26B | chr4:13824324-13826235 FORWARD LENGTH=275;AT4G27690.1 | Symbols: VPS26B | vacuolar protein sorting 26B | chr4:13824019-13826235 FORWARD LENGTH=303
3	3	3	3	3	3	3	3	3		AT4G27640.1	AT4G27640.1	AT4G27640.1 | Symbols: | ARM repeat superfamily protein | chr4:13798013-13802976 REVERSE LENGTH=1048
3	3	3	3	3	3	3	3	3		AT4G27585.1	AT4G27585.1	AT4G27585.1 | Symbols: | SPFH/Band 7/PHB domain-containing membrane-associated protein family | chr4:13766984-13769832 REVERSE LENGTH=411
3	3	3	3	3	3	3	3	3		AT4G27500.1	AT4G27500.1	AT4G27500.1 | Symbols: PPI1 | proton pump interactor 1 | chr4:13743614-13745900 FORWARD LENGTH=612
0	2	2	2	2	3	1	3	3		AT4G27450.1	AT4G27450.1	AT4G27450.1 | Symbols: | Aluminium induced protein with YGL and LRDR motifs | chr4:13727665-13728683 REVERSE LENGTH=250
3	3	3	3	3	3	3	3	3		AT4G27440.2;AT4G27440.1	AT4G27440.2;AT4G27440.1;AT5G54190.1;AT5G54190.2	AT4G27440.2 | Symbols: PORB | protochlorophyllide oxidoreductase B | chr4:13725648-13727107 FORWARD LENGTH=401;AT4G27440.1 | Symbols: PORB | protochlorophyllide oxidoreductase B | chr4:13725648-13727107 FORWARD LENGTH=401
3	3	3	3	3	3	3	3	3		AT4G27430.2;AT4G27430.1	AT4G27430.2;AT4G27430.1;AT1G61100.2;AT1G61100.1	AT4G27430.2 | Symbols: CIP7 | COP1-interacting protein 7 | chr4:13718817-13722736 FORWARD LENGTH=1058;AT4G27430.1 | Symbols: CIP7 | COP1-interacting protein 7 | chr4:13718817-13722736 FORWARD LENGTH=1058
2	2	2	1	3	3	3	2	3		AT4G27320.1	AT4G27320.1	AT4G27320.1 | Symbols: ATPHOS34, PHOS34 | Adenine nucleotide alpha hydrolases-like superfamily protein | chr4:13678860-13680717 REVERSE LENGTH=260
3	3	3	3	3	3	3	3	3		AT4G27170.1	AT4G27170.1	AT4G27170.1 | Symbols: SESA4, AT2S4 | seed storage albumin 4 | chr4:13613637-13614137 FORWARD LENGTH=166
3	3	3	3	3	3	3	3	3		AT4G27160.1	AT4G27160.1	AT4G27160.1 | Symbols: AT2S3, SESA3 | seed storage albumin 3 | chr4:13611836-13612330 FORWARD LENGTH=164
3	3	3	3	3	3	3	3	3		AT4G27140.1	AT4G27140.1	AT4G27140.1 | Symbols: SESA1, AT2S1 | seed storage albumin 1 | chr4:13607363-13607857 FORWARD LENGTH=164
3	3	3	3	3	3	3	3	3		AT4G27090.1	AT4G27090.1	AT4G27090.1 | Symbols: | Ribosomal protein L14 | chr4:13594104-13595187 REVERSE LENGTH=134
2	2	2	3	3	3	3	3	3		AT4G27060.1	AT4G27060.1;AT1G50890.1	AT4G27060.1 | Symbols: TOR1, SPR2, CN | ARM repeat superfamily protein | chr4:13581581-13585070 REVERSE LENGTH=864
3	3	3	3	3	3	3	3	3		AT4G27000.1	AT4G27000.1	AT4G27000.1 | Symbols: ATRBP45C | RNA-binding (RRM/RBD/RNP motifs) family protein | chr4:13554983-13557763 REVERSE LENGTH=415
3	3	3	3	3	3	3	3	3		AT4G26970.1	AT4G26970.1	AT4G26970.1 | Symbols: ACO2 | aconitase 2 | chr4:13543077-13548427 FORWARD LENGTH=995
3	3	3	3	3	3	3	3	3		AT4G26910.3;AT4G26910.2;AT4G26910.1	AT4G26910.3;AT4G26910.2;AT4G26910.1	AT4G26910.3 | Symbols: | Dihydrolipoamide succinyltransferase | chr4:13520127-13522055 REVERSE LENGTH=365;AT4G26910.2 | Symbols: | Dihydrolipoamide succinyltransferase | chr4:13520127-13522889 REVERSE LENGTH=463;AT4G26910.1 | Symbols: | Dihydrolipoamide
3	3	3	3	3	3	3	3	3		AT4G26900.1	AT4G26900.1	AT4G26900.1 | Symbols: AT-HF, HISN4 | HIS HF | chr4:13515514-13519608 FORWARD LENGTH=592
3	3	3	3	3	3	3	3	3		AT4G26870.1	AT4G26870.1	AT4G26870.1 | Symbols: | Class II aminoacyl-tRNA and biotin synthetases superfamily protein | chr4:13505381-13507619 FORWARD LENGTH=532
3	3	3	3	3	3	3	3	3		AT4G26840.1	AT4G26840.1	AT4G26840.1 | Symbols: SUM1, SUMO 1, SUMO1, ATSUMO1 | small ubiquitin-like modifier 1 | chr4:13497466-13498458 FORWARD LENGTH=100
0	0	0	3	3	3	3	3	3		AT4G26750.1	AT4G26750.1	AT4G26750.1 | Symbols: | hydroxyproline-rich glycoprotein family protein | chr4:13475848-13478382 REVERSE LENGTH=421
3	3	3	3	3	3	3	3	3		AT4G26740.1	AT4G26740.1	AT4G26740.1 | Symbols: ATS1, CLO1, ATPXG1 | seed gene 1 | chr4:13473791-13475278 REVERSE LENGTH=245
3	3	3	3	3	3	3	3	3		AT4G26650.2;AT4G26650.1	AT4G26650.2;AT4G26650.1	AT4G26650.2 | Symbols: | RNA-binding (RRM/RBD/RNP motifs) family protein | chr4:13445265-13447592 FORWARD LENGTH=452;AT4G26650.1 | Symbols: | RNA-binding (RRM/RBD/RNP motifs) family protein | chr4:13445552-13447592 FORWARD LENGTH=455
3	3	3	3	3	3	3	3	3		AT4G26630.2;AT4G26630.1	AT4G26630.2;AT4G26630.1	AT4G26630.2 | Symbols: | DEK domain-containing chromatin associated protein | chr4:13430873-13434877 REVERSE LENGTH=763;AT4G26630.1 | Symbols: | DEK domain-containing chromatin associated protein | chr4:13430873-13434877 REVERSE LENGTH=763
3	3	3	3	3	3	3	3	3		AT4G26600.1	AT4G26600.1	AT4G26600.1 | Symbols: | S-adenosyl-L-methionine-dependent methyltransferases superfamily protein | chr4:13419629-13423418 FORWARD LENGTH=671
3	3	3	3	3	3	3	3	3		AT4G26530.2;AT4G26530.1	AT4G26530.2;AT4G26530.1	AT4G26530.2 | Symbols: | Aldolase superfamily protein | chr4:13391566-13392937 FORWARD LENGTH=358;AT4G26530.1 | Symbols: | Aldolase superfamily protein | chr4:13391566-13392937 FORWARD LENGTH=358
3	3	3	3	3	3	3	3	3		AT4G26450.1	AT4G26450.1	AT4G26450.1 | Symbols: | unknown protein;Has 614 Blast hits to 492 proteins in 137 species: Archae - 0;Bacteria - 94;Metazoa - 255;Fungi - 76;Plants - 69;Viruses - 0;Other Eukaryotes - 120 (source: NCBI BLink). | chr4:13362556-13364920 FORWARD LENG
3	3	3	3	3	3	3	3	3		AT4G26300.1	AT4G26300.1	AT4G26300.1 | Symbols: emb1027 | Arginyl-tRNA synthetase, class Ic | chr4:13308400-13313109 REVERSE LENGTH=642
3	3	3	3	3	3	3	3	2		AT4G26190.1	AT4G26190.1	AT4G26190.1 | Symbols: | Haloacid dehalogenase-like hydrolase (HAD) superfamily protein | chr4:13262473-13266282 REVERSE LENGTH=1057
3	3	3	3	3	3	3	3	3		AT4G26010.1	AT4G26010.1	AT4G26010.1 | Symbols: | Peroxidase superfamily protein | chr4:13200653-13201688 FORWARD LENGTH=310
3	3	3	3	3	3	3	3	3		AT4G25960.1	AT4G25960.1;AT1G10680.1	AT4G25960.1 | Symbols: PGP2 | P-glycoprotein 2 | chr4:13177438-13183425 FORWARD LENGTH=1273
3	3	3	3	3	3	3	3	3		AT4G25730.1	AT4G25730.1	AT4G25730.1 | Symbols: | FtsJ-like methyltransferase family protein | chr4:13102906-13106718 REVERSE LENGTH=821
3	3	3	3	3	3	3	3	3		AT4G25630.1	AT4G25630.1;AT5G52490.1	AT4G25630.1 | Symbols: FIB2, ATFIB2 | fibrillarin 2 | chr4:13074239-13076205 FORWARD LENGTH=320
3	3	3	3	3	3	3	3	3		AT4G25550.1	AT4G25550.1	AT4G25550.1 | Symbols: | Cleavage/polyadenylation specificity factor, 25kDa subunit | chr4:13048519-13050873 FORWARD LENGTH=200
3	3	3	3	3	3	3	3	3		AT4G25450.3;AT4G25450.1;AT4G25450.2	AT4G25450.3;AT4G25450.1;AT4G25450.2	AT4G25450.3 | Symbols: ATNAP8, NAP8 | non-intrinsic ABC protein 8 | chr4:13009845-13013229 REVERSE LENGTH=545;AT4G25450.1 | Symbols: ATNAP8, NAP8 | non-intrinsic ABC protein 8 | chr4:13009845-13013912 REVERSE LENGTH=714;AT4G25450.2 | Symbols: ATNAP8, NAP8
3	3	3	3	3	3	3	3	3		AT4G25340.1;AT4G25340.2	AT4G25340.1;AT4G25340.2	AT4G25340.1 | Symbols: FKBP53, ATFKBP53 | FK506 BINDING PROTEIN 53 | chr4:12959657-12962632 REVERSE LENGTH=477;AT4G25340.2 | Symbols: FKBP53 | FK506 BINDING PROTEIN 53 | chr4:12959863-12962632 REVERSE LENGTH=444
3	3	3	3	3	3	3	3	3		AT4G25320.1	AT4G25320.1	AT4G25320.1 | Symbols: | AT hook motif DNA-binding family protein | chr4:12954488-12956342 FORWARD LENGTH=404
3	3	3	3	3	3	3	2	3		AT4G25290.1	AT4G25290.1	AT4G25290.1 | Symbols: | DNA photolyases;DNA photolyases | chr4:12941486-12944994 REVERSE LENGTH=692
1	2	2	3	3	3	3	3	3		AT4G25270.1	AT4G25270.1	AT4G25270.1 | Symbols: | Tetratricopeptide repeat (TPR)-like superfamily protein | chr4:12937253-12938836 REVERSE LENGTH=527
3	3	3	3	3	3	3	3	3		AT4G25210.1	AT4G25210.1	AT4G25210.1 | Symbols: | DNA-binding storekeeper protein-related transcriptional regulator | chr4:12918446-12919552 FORWARD LENGTH=368
3	3	3	3	3	3	3	3	3		AT4G25140.1	AT4G25140.1	AT4G25140.1 | Symbols: OLEO1, OLE1 | oleosin 1 | chr4:12900498-12901259 FORWARD LENGTH=173
3	3	3	3	3	3	3	3	3		AT4G25130.1	AT4G25130.1	AT4G25130.1 | Symbols: PMSR4 | peptide met sulfoxide reductase 4 | chr4:12898802-12899998 REVERSE LENGTH=258
3	3	3	3	3	3	3	3	3		AT4G25080.4;AT4G25080.5;AT4G25080.3;AT4G25080.2;AT4G25080.1	AT4G25080.4;AT4G25080.5;AT4G25080.3;AT4G25080.2;AT4G25080.1	AT4G25080.4 | Symbols: CHLM | magnesium-protoporphyrin IX methyltransferase | chr4:12877216-12878128 FORWARD LENGTH=245;AT4G25080.5 | Symbols: CHLM | magnesium-protoporphyrin IX methyltransferase | chr4:12877015-12878128 FORWARD LENGTH=312;AT4G25080.3 | Sy
3	3	3	2	1	3	1	1	3		AT4G25050.1;AT4G25050.2	AT4G25050.1;AT4G25050.2	AT4G25050.1 | Symbols: ACP4 | acyl carrier protein 4 | chr4:12870178-12871024 FORWARD LENGTH=137;AT4G25050.2 | Symbols: ACP4 | acyl carrier protein 4 | chr4:12870178-12871024 FORWARD LENGTH=149
3	3	3	3	3	3	3	3	3		AT4G24830.1;AT4G24830.2	AT4G24830.1;AT4G24830.2	AT4G24830.1 | Symbols: | arginosuccinate synthase family | chr4:12793085-12795857 REVERSE LENGTH=494;AT4G24830.2 | Symbols: | arginosuccinate synthase family | chr4:12793085-12795857 REVERSE LENGTH=450
3	3	3	3	3	3	3	3	3		AT4G24820.2;AT4G24820.1	AT4G24820.2;AT4G24820.1	AT4G24820.2 | Symbols: | 26S proteasome, regulatory subunit Rpn7;Proteasome component (PCI) domain | chr4:12790471-12792599 REVERSE LENGTH=387;AT4G24820.1 | Symbols: | 26S proteasome, regulatory subunit Rpn7;Proteasome component (PCI) domain | chr4:12790
3	3	3	3	3	3	3	3	3		AT4G24800.3;AT4G24800.2;AT4G24800.1	AT4G24800.3;AT4G24800.2;AT4G24800.1	AT4G24800.3 | Symbols: | MA3 domain-containing protein | chr4:12782463-12784902 FORWARD LENGTH=702;AT4G24800.2 | Symbols: | MA3 domain-containing protein | chr4:12782463-12784902 FORWARD LENGTH=702;AT4G24800.1 | Symbols: | MA3 domain-containing protein
3	3	3	3	3	3	3	3	3		AT4G24780.2;AT4G24780.1	AT4G24780.2;AT4G24780.1;AT3G27400.1	AT4G24780.2 | Symbols: | Pectin lyase-like superfamily protein | chr4:12770631-12772227 REVERSE LENGTH=408;AT4G24780.1 | Symbols: | Pectin lyase-like superfamily protein | chr4:12770631-12772227 REVERSE LENGTH=408
3	3	3	3	3	3	3	3	3		AT4G24750.1	AT4G24750.1	AT4G24750.1 | Symbols: | Rhodanese/Cell cycle control phosphatase superfamily protein | chr4:12758422-12760749 REVERSE LENGTH=292
3	3	3	3	3	3	3	3	3		AT4G24680.1	AT4G24680.1	AT4G24680.1 | Symbols: MOS1 | modifier of snc1 | chr4:12733425-12739737 FORWARD LENGTH=1427
3	3	3	3	3	3	3	3	3		AT4G24620.1;AT4G24620.2	AT4G24620.1;AT4G24620.2	AT4G24620.1 | Symbols: PGI1, PGI | phosphoglucose isomerase 1 | chr4:12708972-12712610 REVERSE LENGTH=613;AT4G24620.2 | Symbols: PGI1, PGI | phosphoglucose isomerase 1 | chr4:12709097-12712610 REVERSE LENGTH=570
3	3	3	3	3	3	3	3	3		AT4G24550.2;AT4G24550.1;AT4G24550.3	AT4G24550.2;AT4G24550.1;AT4G24550.3	AT4G24550.2 | Symbols: | Clathrin adaptor complexes medium subunit family protein | chr4:12675873-12678903 FORWARD LENGTH=451;AT4G24550.1 | Symbols: | Clathrin adaptor complexes medium subunit family protein | chr4:12675873-12678526 FORWARD LENGTH=380;AT
3	3	3	3	3	3	3	3	3		AT4G24520.1;AT4G24520.2	AT4G24520.1;AT4G24520.2	AT4G24520.1 | Symbols: ATR1, AR1 | P450 reductase 1 | chr4:12663065-12667066 REVERSE LENGTH=692;AT4G24520.2 | Symbols: ATR1 | P450 reductase 1 | chr4:12663065-12667066 REVERSE LENGTH=688
3	3	3	3	3	3	3	3	3		AT4G24510.1	AT4G24510.1	AT4G24510.1 | Symbols: CER2, VC2, VC-2 | HXXXD-type acyl-transferase family protein | chr4:12660929-12662537 FORWARD LENGTH=421
3	3	3	3	3	3	3	3	3		AT4G24490.2;AT4G24490.1	AT4G24490.2;AT4G24490.1;AT5G41820.1	AT4G24490.2 | Symbols: | RAB geranylgeranyl transferase alpha subunit 1 | chr4:12655330-12658103 REVERSE LENGTH=678;AT4G24490.1 | Symbols: RGTA1, ATRGTA1 | RAB geranylgeranyl transferase alpha subunit 1 | chr4:12655330-12658103 REVERSE LENGTH=678
3	3	3	3	3	3	3	3	3		AT4G24330.1	AT4G24330.1	AT4G24330.1 | Symbols: | Protein of unknown function (DUF1682) | chr4:12603848-12606229 REVERSE LENGTH=478
3	3	3	3	3	3	3	3	3		AT4G24220.2;AT4G24220.1	AT4G24220.2;AT4G24220.1	AT4G24220.2 | Symbols: VEP1, AWI31 | NAD(P)-binding Rossmann-fold superfamily protein | chr4:12565219-12566474 FORWARD LENGTH=387;AT4G24220.1 | Symbols: VEP1, AWI31 | NAD(P)-binding Rossmann-fold superfamily protein | chr4:12565219-12566474 FORWARD LENGTH=
3	3	3	3	3	3	3	3	3		AT4G24190.2;AT4G24190.1	AT4G24190.2;AT4G24190.1	AT4G24190.2 | Symbols: SHD, AtHsp90.7, AtHsp90-7 | Chaperone protein htpG family protein | chr4:12551902-12555851 REVERSE LENGTH=823;AT4G24190.1 | Symbols: SHD, HSP90.7, AtHsp90.7, AtHsp90-7 | Chaperone protein htpG family protein | chr4:12551902-12555851
2	3	3	3	3	3	3	3	3		AT4G23940.1	AT4G23940.1	AT4G23940.1 | Symbols: | FtsH extracellular protease family | chr4:12437108-12441841 FORWARD LENGTH=946
0	0	0	2	3	3	3	3	3		AT4G23860.3;AT4G23860.2;AT4G23860.1	AT4G23860.3;AT4G23860.2;AT4G23860.1	AT4G23860.3 | Symbols: | PHD finger protein-related | chr4:12409336-12411336 FORWARD LENGTH=452;AT4G23860.2 | Symbols: | PHD finger protein-related | chr4:12409336-12411336 FORWARD LENGTH=452;AT4G23860.1 | Symbols: | PHD finger protein-related | chr4:12
3	3	3	3	3	3	3	3	3		AT4G23850.1	AT4G23850.1;AT1G64400.1	AT4G23850.1 | Symbols: LACS4 | AMP-dependent synthetase and ligase family protein | chr4:12403720-12408263 REVERSE LENGTH=666
2	2	3	2	2	3	3	2	2		AT4G23690.1	AT4G23690.1;AT1G64160.1	AT4G23690.1 | Symbols: | Disease resistance-responsive (dirigent-like protein) family protein | chr4:12339152-12339715 REVERSE LENGTH=187
3	3	3	3	3	3	3	3	3		AT4G23680.1	AT4G23680.1	AT4G23680.1 | Symbols: | Polyketide cyclase/dehydrase and lipid transport superfamily protein | chr4:12336416-12337417 REVERSE LENGTH=151
3	3	3	3	3	3	3	3	3		AT4G23670.1	AT4G23670.1;AT4G14060.1	AT4G23670.1 | Symbols: | Polyketide cyclase/dehydrase and lipid transport superfamily protein | chr4:12332846-12333656 REVERSE LENGTH=151
3	3	3	3	3	3	3	3	3		AT4G23650.1	AT4G23650.1	AT4G23650.1 | Symbols: CDPK6, CPK3 | calcium-dependent protein kinase 6 | chr4:12324967-12327415 REVERSE LENGTH=529
3	3	3	3	3	3	3	3	3		AT4G23630.1	AT4G23630.1;AT5G41600.1	AT4G23630.1 | Symbols: BTI1, RTNLB1 | VIRB2-interacting protein 1 | chr4:12318070-12319574 FORWARD LENGTH=275
3	3	3	3	3	3	3	3	3		AT4G23560.1	AT4G23560.1;AT4G09740.1	AT4G23560.1 | Symbols: AtGH9B15, GH9B15 | glycosyl hydrolase 9B15 | chr4:12293633-12295788 REVERSE LENGTH=479
1	1	3	3	3	3	2	1	3		AT4G23540.1	AT4G23540.1	AT4G23540.1 | Symbols: | ARM repeat superfamily protein | chr4:12280547-12286420 REVERSE LENGTH=1131
1	3	3	3	3	2	3	2	3		AT4G23500.1	AT4G23500.1	AT4G23500.1 | Symbols: | Pectin lyase-like superfamily protein | chr4:12264640-12267074 FORWARD LENGTH=495
3	3	3	3	2	3	3	3	3		AT4G23400.1	AT4G23400.1	AT4G23400.1 | Symbols: PIP1D, PIP1;5 | plasma membrane intrinsic protein 1;5 | chr4:12220792-12222155 FORWARD LENGTH=287
1	2	3	3	3	3	2	3	3		AT4G23180.1	AT4G23180.1	AT4G23180.1 | Symbols: CRK10, RLK4 | cysteine-rich RLK (RECEPTOR-like protein kinase) 10 | chr4:12138171-12140780 FORWARD LENGTH=669
3	3	3	3	3	3	3	3	3		AT4G23100.3;AT4G23100.1;AT4G23100.2	AT4G23100.3;AT4G23100.1;AT4G23100.2	AT4G23100.3 | Symbols: GSH1 | glutamate-cysteine ligase | chr4:12103458-12106751 REVERSE LENGTH=522;AT4G23100.1 | Symbols: RML1, PAD2, GSH1, CAD2, ATECS1, GSHA | glutamate-cysteine ligase | chr4:12103458-12106751 REVERSE LENGTH=522;AT4G23100.2 | Symbols: R
3	3	3	3	3	3	3	3	3		AT4G22890.3;AT4G22890.2;AT4G22890.1;AT4G22890.4;AT4G22890.5	AT4G22890.3;AT4G22890.2;AT4G22890.1;AT4G22890.4;AT4G22890.5	AT4G22890.3 | Symbols: PGR5-LIKE A | PGR5-LIKE A | chr4:12007157-12009175 FORWARD LENGTH=324;AT4G22890.2 | Symbols: PGR5-LIKE A | PGR5-LIKE A | chr4:12007157-12009175 FORWARD LENGTH=324;AT4G22890.1 | Symbols: PGR5-LIKE A | PGR5-LIKE A | chr4:12007157-12009
3	3	1	3	3	3	3	3	3		AT4G22670.1	AT4G22670.1	AT4G22670.1 | Symbols: AtHip1, HIP1, TPR11 | HSP70-interacting protein 1 | chr4:11918236-11920671 FORWARD LENGTH=441
0	0	0	1	3	3	3	3	3		AT4G22360.1	AT4G22360.1	AT4G22360.1 | Symbols: | SWIB complex BAF60b domain-containing protein | chr4:11807811-11809660 FORWARD LENGTH=385
2	3	3	3	3	3	3	3	3		AT4G22350.1;AT4G22350.2;AT4G22285.1	AT4G22350.1;AT4G22350.2;AT4G22285.1;AT4G22410.1	AT4G22350.1 | Symbols: | Ubiquitin C-terminal hydrolases superfamily protein | chr4:11804073-11806939 REVERSE LENGTH=510;AT4G22350.2 | Symbols: | Ubiquitin C-terminal hydrolases superfamily protein | chr4:11804073-11806939 REVERSE LENGTH=539;AT4G22285.1
3	3	3	3	3	3	3	3	3		AT4G22010.1	AT4G22010.1	AT4G22010.1 | Symbols: sks4 | SKU5 similar 4 | chr4:11663429-11666463 FORWARD LENGTH=541
2	3	3	3	3	3	3	3	3		AT4G21770.1	AT4G21770.1	AT4G21770.1 | Symbols: | Pseudouridine synthase family protein | chr4:11564028-11566345 REVERSE LENGTH=472
1	2	2	3	3	3	3	3	3		AT4G21750.2;AT4G21750.1	AT4G21750.2;AT4G21750.1	AT4G21750.2 | Symbols: ATML1 | Homeobox-leucine zipper family protein / lipid-binding START domain-containing protein | chr4:11556965-11560243 FORWARD LENGTH=762;AT4G21750.1 | Symbols: ATML1 | Homeobox-leucine zipper family protein / lipid-binding START do
3	3	3	3	3	3	3	3	3		AT4G21710.1	AT4G21710.1	AT4G21710.1 | Symbols: NRPB2, EMB1989, RPB2 | DNA-directed RNA polymerase family protein | chr4:11535684-11542200 REVERSE LENGTH=1188
3	3	3	3	3	3	3	3	3		AT4G21670.1	AT4G21670.1	AT4G21670.1 | Symbols: CPL1, FRY2, ATCPL1 | C-terminal domain phosphatase-like 1 | chr4:11511511-11516922 FORWARD LENGTH=967
3	3	3	3	3	3	3	3	3		AT4G21660.1;AT4G21660.2	AT4G21660.1;AT4G21660.2	AT4G21660.1 | Symbols: | proline-rich spliceosome-associated (PSP) family protein | chr4:11506259-11509772 REVERSE LENGTH=584;AT4G21660.2 | Symbols: | proline-rich spliceosome-associated (PSP) family protein | chr4:11506259-11509772 REVERSE LENGTH=598
3	3	3	3	3	3	3	3	3		AT4G21450.1;AT4G21450.3;AT4G21450.2	AT4G21450.1;AT4G21450.3;AT4G21450.2;AT4G05060.1	AT4G21450.1 | Symbols: | PapD-like superfamily protein | chr4:11426136-11428125 FORWARD LENGTH=295;AT4G21450.3 | Symbols: | PapD-like superfamily protein | chr4:11426136-11428125 FORWARD LENGTH=314;AT4G21450.2 | Symbols: | PapD-like superfamily protein
3	3	3	3	3	3	3	3	3		AT4G21280.1;AT4G21280.2	AT4G21280.1;AT4G21280.2	AT4G21280.1 | Symbols: PSBQ, PSBQA, PSBQ-1 | photosystem II subunit QA | chr4:11334446-11335587 FORWARD LENGTH=223;AT4G21280.2 | Symbols: PSBQ, PSBQA, PSBQ-1 | photosystem II subunit QA | chr4:11334446-11335587 FORWARD LENGTH=224
3	3	3	3	2	2	2	2	3		AT4G21180.1	AT4G21180.1	AT4G21180.1 | Symbols: ATERDJ2B | DnaJ / Sec63 Brl domains-containing protein | chr4:11289337-11292179 FORWARD LENGTH=661
3	3	3	3	3	3	3	3	3		AT4G21150.2;AT4G21150.3;AT4G21150.1	AT4G21150.2;AT4G21150.3;AT4G21150.1	AT4G21150.2 | Symbols: HAP6 | ribophorin II (RPN2) family protein | chr4:11278649-11283599 FORWARD LENGTH=678;AT4G21150.3 | Symbols: HAP6 | ribophorin II (RPN2) family protein | chr4:11278646-11283599 FORWARD LENGTH=691;AT4G21150.1 | Symbols: HAP6 | riboph
3	3	3	3	3	3	3	3	3		AT4G20890.1	AT4G20890.1	AT4G20890.1 | Symbols: TUB9 | tubulin beta-9 chain | chr4:11182218-11183840 FORWARD LENGTH=444
2	3	3	2	3	3	3	3	3		AT4G20860.1	AT4G20860.1	AT4G20860.1 | Symbols: | FAD-binding Berberine family protein | chr4:11172726-11174318 FORWARD LENGTH=530
3	3	3	3	3	3	3	3	3		AT4G20850.1	AT4G20850.1	AT4G20850.1 | Symbols: TPP2 | tripeptidyl peptidase ii | chr4:11160935-11169889 REVERSE LENGTH=1380
3	3	3	2	3	3	3	3	3		AT4G20400.2;AT4G20400.1	AT4G20400.2;AT4G20400.1	AT4G20400.2 | Symbols: JMJ14, PKDM7B | JUMONJI 14 | chr4:11009753-11013588 FORWARD LENGTH=897;AT4G20400.1 | Symbols: JMJ14, PKDM7B | JUMONJI 14 | chr4:11009004-11013588 FORWARD LENGTH=954
3	3	3	3	3	3	3	3	3		AT4G20360.1	AT4G20360.1	AT4G20360.1 | Symbols: ATRAB8D, ATRABE1B, RABE1b | RAB GTPase homolog E1B | chr4:10990036-10991466 FORWARD LENGTH=476
2	3	3	2	2	3	3	3	3		AT4G20130.1	AT4G20130.1	AT4G20130.1 | Symbols: PTAC14 | plastid transcriptionally active 14 | chr4:10878914-10881697 FORWARD LENGTH=483
3	3	3	3	3	3	3	3	3		AT4G19880.3;AT4G19880.1;AT4G19880.2	AT4G19880.3;AT4G19880.1;AT4G19880.2;AT5G44990.3;AT5G44990.2;AT5G44990.1	AT4G19880.3 | Symbols: | Glutathione S-transferase family protein | chr4:10784824-10786376 REVERSE LENGTH=313;AT4G19880.1 | Symbols: | Glutathione S-transferase family protein | chr4:10784691-10786376 REVERSE LENGTH=356;AT4G19880.2 | Symbols: | Glutathi
3	3	3	3	3	3	3	3	3		AT4G19710.2;AT4G19710.1	AT4G19710.2;AT4G19710.1	AT4G19710.2 | Symbols: AK-HSDH II, AK-HSDH | aspartate kinase-homoserine dehydrogenase ii | chr4:10725229-10729536 FORWARD LENGTH=916;AT4G19710.1 | Symbols: AK-HSDH II, AK-HSDH | aspartate kinase-homoserine dehydrogenase ii | chr4:10725229-10729278 FORWARD
1	3	3	3	3	3	3	3	3		AT4G19610.1	AT4G19610.1	AT4G19610.1 | Symbols: | nucleotide binding;nucleic acid binding;RNA binding | chr4:10677482-10681623 FORWARD LENGTH=816
3	3	3	3	3	3	3	3	3		AT4G19490.2;AT4G19490.1	AT4G19490.2;AT4G19490.1	AT4G19490.2 | Symbols: ATVPS54, VPS54 | VPS54 | chr4:10616017-10622934 FORWARD LENGTH=1034;AT4G19490.1 | Symbols: ATVPS54, VPS54 | VPS54 | chr4:10616017-10622934 FORWARD LENGTH=1034
3	3	3	3	3	3	3	3	3		AT4G19410.1;AT4G19410.2	AT4G19410.1;AT4G19410.2	AT4G19410.1 | Symbols: | Pectinacetylesterase family protein | chr4:10582188-10584766 REVERSE LENGTH=391;AT4G19410.2 | Symbols: | Pectinacetylesterase family protein | chr4:10581037-10584766 REVERSE LENGTH=517
3	3	3	3	3	3	3	3	3		AT4G19210.1	AT4G19210.1	AT4G19210.1 | Symbols: ATRLI2, RLI2 | RNAse l inhibitor protein 2 | chr4:10501906-10504776 FORWARD LENGTH=605
2	3	3	3	3	3	3	3	3		AT4G19190.1	AT4G19190.1	AT4G19190.1 | Symbols: | zinc knuckle (CCHC-type) family protein | chr4:10493323-10495969 FORWARD LENGTH=595
2	3	2	3	3	3	3	3	3		AT4G18820.1	AT4G18820.1	AT4G18820.1 | Symbols: | AAA-type ATPase family protein | chr4:10330371-10334090 FORWARD LENGTH=1097
3	3	3	3	3	3	3	3	3		AT4G18480.1	AT4G18480.1	AT4G18480.1 | Symbols: CHLI1, CH42, CH-42, CHL11, CHLI-1 | P-loop containing nucleoside triphosphate hydrolases superfamily protein | chr4:10201897-10203361 REVERSE LENGTH=424
2	3	3	3	3	3	3	3	3		AT4G18465.1	AT4G18465.1	AT4G18465.1 | Symbols: | RNA helicase family protein | chr4:10197056-10201611 FORWARD LENGTH=695
3	3	3	3	3	3	3	3	3		AT4G18240.1	AT4G18240.1	AT4G18240.1 | Symbols: ATSS4, SSIV, SS4 | starch synthase 4 | chr4:10082221-10087044 FORWARD LENGTH=1040
0	0	3	2	3	3	3	1	3		AT4G18130.1	AT4G18130.1	AT4G18130.1 | Symbols: PHYE | phytochrome E | chr4:10042312-10045948 REVERSE LENGTH=1112
3	3	3	3	3	3	3	3	3		AT4G18100.1	AT4G18100.1	AT4G18100.1 | Symbols: | Ribosomal protein L32e | chr4:10035715-10036475 REVERSE LENGTH=133
3	3	3	3	3	3	3	3	3		AT4G17950.1	AT4G17950.1	AT4G17950.1 | Symbols: | AT hook motif DNA-binding family protein | chr4:9967295-9969007 REVERSE LENGTH=439
3	3	3	3	3	3	3	3	3		AT4G17890.2;AT4G17890.1	AT4G17890.2;AT4G17890.1	AT4G17890.2 | Symbols: AGD8 | ARF-GAP domain 8 | chr4:9937121-9938988 FORWARD LENGTH=384;AT4G17890.1 | Symbols: AGD8 | ARF-GAP domain 8 | chr4:9937121-9939146 FORWARD LENGTH=413
3	3	3	3	3	3	3	3	3		AT4G17770.1	AT4G17770.1	AT4G17770.1 | Symbols: ATTPS5, TPS5 | trehalose phosphatase/synthase 5 | chr4:9877055-9880084 FORWARD LENGTH=862
3	3	3	3	3	3	3	3	3		AT4G17620.2;AT4G17620.1;AT4G17620.3	AT4G17620.2;AT4G17620.1;AT4G17620.3	AT4G17620.2 | Symbols: | glycine-rich protein | chr4:9822005-9824859 FORWARD LENGTH=544;AT4G17620.1 | Symbols: | glycine-rich protein | chr4:9822005-9824859 FORWARD LENGTH=544;AT4G17620.3 | Symbols: | glycine-rich protein | chr4:9822005-9824859 FORWARD
3	3	3	3	3	3	3	3	3		AT4G17560.1	AT4G17560.1	AT4G17560.1 | Symbols: | Ribosomal protein L19 family protein | chr4:9780343-9781752 FORWARD LENGTH=225
3	3	3	3	3	3	3	3	3		AT4G17530.1	AT4G17530.1	AT4G17530.1 | Symbols: RAB1C, ATRAB1C, ATRABD2C | RAB GTPase homolog 1C | chr4:9773721-9775424 REVERSE LENGTH=202
3	3	3	3	3	3	3	3	3		AT4G17520.1	AT4G17520.1	AT4G17520.1 | Symbols: | Hyaluronan / mRNA binding family | chr4:9771496-9773313 FORWARD LENGTH=360
1	3	2	1	3	3	3	3	3		AT4G17330.1	AT4G17330.1	AT4G17330.1 | Symbols: ATG2484-1, G2484-1 | G2484-1 protein | chr4:9689263-9697172 REVERSE LENGTH=2037
3	3	3	3	3	3	3	3	3		AT4G17300.1	AT4G17300.1;REV__AT1G29710.1	AT4G17300.1 | Symbols: NS1, OVA8, ATNS1 | Class II aminoacyl-tRNA and biotin synthetases superfamily protein | chr4:9681558-9684833 FORWARD LENGTH=567
3	3	3	3	3	3	3	3	3		AT4G17170.1	AT4G17170.1	AT4G17170.1 | Symbols: AT-RAB2, ATRABB1C, ATRAB2A, RAB2A, RABB1C, ATRAB-B1B, RAB-B1B | RAB GTPase homolog B1C | chr4:9644908-9646220 REVERSE LENGTH=211
3	3	3	3	3	3	3	3	3		AT4G17140.1;AT4G17140.2;AT4G17140.3	AT4G17140.1;AT4G17140.2;AT4G17140.3	AT4G17140.1 | Symbols: | pleckstrin homology (PH) domain-containing protein | chr4:9613617-9636618 REVERSE LENGTH=4216;AT4G17140.2 | Symbols: | pleckstrin homology (PH) domain-containing protein | chr4:9613617-9636618 REVERSE LENGTH=4218;AT4G17140.3 | Sy
3	3	3	3	3	3	3	3	3		AT4G17090.1	AT4G17090.1	AT4G17090.1 | Symbols: CT-BMY, BAM3, BMY8 | chloroplast beta-amylase | chr4:9605266-9607250 REVERSE LENGTH=548
3	3	3	3	3	3	3	3	3		AT4G17040.1	AT4G17040.1	AT4G17040.1 | Symbols: CLPR4 | CLP protease R subunit 4 | chr4:9586740-9589297 REVERSE LENGTH=305
3	3	3	3	3	3	3	3	3		AT4G16990.2;AT4G16990.1;AT4G16990.5;AT4G16990.3;AT4G16990.4	AT4G16990.2;AT4G16990.1;AT4G16990.5;AT4G16990.3;AT4G16990.4	AT4G16990.2 | Symbols: RLM3 | disease resistance protein (TIR-NBS class), putative | chr4:9560155-9565225 FORWARD LENGTH=796;AT4G16990.1 | Symbols: RLM3 | disease resistance protein (TIR-NBS class), putative | chr4:9560155-9564616 FORWARD LENGTH=670;AT4G16
3	3	3	3	3	3	3	3	3		AT4G16830.1;AT4G16830.2;AT4G16830.3	AT4G16830.1;AT4G16830.2;AT4G16830.3	AT4G16830.1 | Symbols: | Hyaluronan / mRNA binding family | chr4:9470621-9472308 FORWARD LENGTH=355;AT4G16830.2 | Symbols: | Hyaluronan / mRNA binding family | chr4:9470979-9472308 FORWARD LENGTH=265;AT4G16830.3 | Symbols: | Hyaluronan / mRNA binding fa
3	3	3	3	3	3	3	3	3		AT4G16760.1;AT4G16760.2	AT4G16760.1;AT4G16760.2	AT4G16760.1 | Symbols: ACX1, ATACX1 | acyl-CoA oxidase 1 | chr4:9424930-9428689 REVERSE LENGTH=664;AT4G16760.2 | Symbols: ACX1 | acyl-CoA oxidase 1 | chr4:9424930-9428689 REVERSE LENGTH=651
3	3	3	3	3	3	3	3	3		AT4G16720.1;AT4G17390.1	AT4G16720.1;AT4G17390.1	AT4G16720.1 | Symbols: | Ribosomal protein L23/L15e family protein | chr4:9400156-9401315 REVERSE LENGTH=204;AT4G17390.1 | Symbols: | Ribosomal protein L23/L15e family protein | chr4:9714407-9715545 REVERSE LENGTH=204
3	3	3	3	3	3	3	3	3		AT4G16630.1	AT4G16630.1	AT4G16630.1 | Symbols: | DEA(D/H)-box RNA helicase family protein | chr4:9362176-9366449 REVERSE LENGTH=789
2	3	3	3	3	2	1	2	1		AT4G16500.1	AT4G16500.1	AT4G16500.1 | Symbols: | Cystatin/monellin superfamily protein | chr4:9301530-9301883 REVERSE LENGTH=117
3	3	2	2	3	3	2	3	2		AT4G16450.2;AT4G16450.1	AT4G16450.2;AT4G16450.1	AT4G16450.2 | Symbols: | unknown protein;FUNCTIONS IN: molecular_function unknown;INVOLVED IN: photorespiration;LOCATED IN: mitochondrion, mitochondrial membrane, mitochondrial respiratory chain complex I, respiratory chain complex I;EXPRESSED IN: 25
1	3	3	3	3	3	3	3	3		AT4G16430.1	AT4G16430.1	AT4G16430.1 | Symbols: | basic helix-loop-helix (bHLH) DNA-binding superfamily protein | chr4:9267599-9269002 FORWARD LENGTH=467
3	3	3	3	3	3	3	3	3		AT4G16390.1	AT4G16390.1	AT4G16390.1 | Symbols: SVR7 | pentatricopeptide (PPR) repeat-containing protein | chr4:9257985-9260093 FORWARD LENGTH=702
3	3	3	3	3	3	3	3	3		AT4G16340.1	AT4G16340.1	AT4G16340.1 | Symbols: SPK1 | guanyl-nucleotide exchange factors;GTPase binding;GTP binding | chr4:9228773-9241060 REVERSE LENGTH=1830
1	1	3	3	3	3	1	2	3		AT4G16330.2;AT4G16330.1	AT4G16330.2;AT4G16330.1	AT4G16330.2 | Symbols: | 2-oxoglutarate (2OG) and Fe(II)-dependent oxygenase superfamily protein | chr4:9226298-9227914 REVERSE LENGTH=364;AT4G16330.1 | Symbols: | 2-oxoglutarate (2OG) and Fe(II)-dependent oxygenase superfamily protein | chr4:9226298-922
3	3	3	3	3	2	2	3	2		AT4G16280.3;AT4G16280.4;AT4G16280.2;AT4G16280.1	AT4G16280.3;AT4G16280.4;AT4G16280.2;AT4G16280.1	AT4G16280.3 | Symbols: FCA | RNA binding;abscisic acid binding | chr4:9208564-9214412 REVERSE LENGTH=533;AT4G16280.4 | Symbols: | RNA binding;abscisic acid binding | chr4:9207164-9214187 REVERSE LENGTH=672;AT4G16280.2 | Symbols: FCA | RNA binding;abscisic
3	3	3	3	3	3	3	3	3		AT4G16210.1	AT4G16210.1	AT4G16210.1 | Symbols: ECHIA, E-COAH-2 | enoyl-CoA hydratase/isomerase A | chr4:9176864-9177978 REVERSE LENGTH=265
3	3	3	3	3	3	3	3	3		AT4G16155.1	AT4G16155.1	AT4G16155.1 | Symbols: | dihydrolipoyl dehydrogenases | chr4:9153570-9157322 REVERSE LENGTH=630
3	3	3	3	3	3	3	3	3		AT4G16150.1	AT4G16150.1	AT4G16150.1 | Symbols: | calmodulin binding;transcription regulators | chr4:9148225-9153048 FORWARD LENGTH=923
3	3	3	3	3	3	3	3	3		AT4G16143.2;AT4G16143.1	AT4G16143.2;AT4G16143.1;AT4G02150.1	AT4G16143.2 | Symbols: IMPA-2 | importin alpha isoform 2 | chr4:9134450-9137134 REVERSE LENGTH=535;AT4G16143.1 | Symbols: IMPA-2 | importin alpha isoform 2 | chr4:9134450-9137134 REVERSE LENGTH=535
3	3	3	3	3	3	3	3	3		AT4G16130.1	AT4G16130.1;AT3G42850.1	AT4G16130.1 | Symbols: ARA1, ISA1, ATISA1 | arabinose kinase | chr4:9120875-9127656 FORWARD LENGTH=1039
3	3	3	3	3	3	3	3	3		AT4G15900.1	AT4G15900.1;AT3G16650.1	AT4G15900.1 | Symbols: PRL1 | pleiotropic regulatory locus 1 | chr4:9023775-9027443 FORWARD LENGTH=486
3	3	3	3	3	3	3	3	3		AT4G15760.2;AT4G15760.1	AT4G15760.2;AT4G15760.1	AT4G15760.2 | Symbols: MO1 | monooxygenase 1 | chr4:8972785-8974473 REVERSE LENGTH=409;AT4G15760.1 | Symbols: MO1 | monooxygenase 1 | chr4:8972785-8974548 REVERSE LENGTH=422
3	3	3	3	3	3	3	3	3		AT4G15560.1	AT4G15560.1;AT3G21500.1;AT3G21500.2	AT4G15560.1 | Symbols: CLA1, DEF, CLA, DXS, DXPS2 | Deoxyxylulose-5-phosphate synthase | chr4:8884218-8887254 FORWARD LENGTH=717
2	3	3	3	3	3	3	3	3		AT4G15550.1	AT4G15550.1	AT4G15550.1 | Symbols: IAGLU | indole-3-acetate beta-D-glucosyltransferase | chr4:8877877-8879301 REVERSE LENGTH=474
3	3	3	3	3	3	3	3	3		AT4G15530.3;AT4G15530.2;AT4G15530.4;AT4G15530.1;AT4G15530.6;AT4G15530.5	AT4G15530.3;AT4G15530.2;AT4G15530.4;AT4G15530.1;AT4G15530.6;AT4G15530.5	AT4G15530.3 | Symbols: PPDK | pyruvate orthophosphate dikinase | chr4:8864828-8869129 REVERSE LENGTH=857;AT4G15530.2 | Symbols: PPDK | pyruvate orthophosphate dikinase | chr4:8864828-8869183 REVERSE LENGTH=875;AT4G15530.4 | Symbols: PPDK | pyruvate orthoph
0	0	0	0	0	3	0	1	3		AT4G15410.1	AT4G15410.1	AT4G15410.1 | Symbols: PUX5 | serine/threonine protein phosphatase 2A 55 kDa regulatory subunit B prime gamma | chr4:8814868-8816596 FORWARD LENGTH=421
3	3	3	3	3	3	3	3	3		AT4G15180.1	AT4G15180.1	AT4G15180.1 | Symbols: SDG2, ATXR3 | SET domain protein 2 | chr4:8651999-8662178 FORWARD LENGTH=2335
3	3	3	3	3	3	3	3	3		AT4G15110.1	AT4G15110.1	AT4G15110.1 | Symbols: CYP97B3 | cytochrome P450, family 97, subfamily B, polypeptide 3 | chr4:8629922-8632993 REVERSE LENGTH=580
3	3	3	2	3	3	3	2	3		AT4G15090.1	AT4G15090.1	AT4G15090.1 | Symbols: FAR1 | FRS (FAR1 Related Sequences) transcription factor family | chr4:8614806-8617870 FORWARD LENGTH=827
3	3	3	3	3	3	3	3	3		AT4G15000.2;AT4G15000.1	AT4G15000.2;AT4G15000.1	AT4G15000.2 | Symbols: | Ribosomal L27e protein family | chr4:8571896-8572387 FORWARD LENGTH=131;AT4G15000.1 | Symbols: | Ribosomal L27e protein family | chr4:8571896-8572303 FORWARD LENGTH=135
3	3	3	3	3	3	3	3	3		AT4G14960.2;AT4G14960.1	AT4G14960.2;AT4G14960.1	AT4G14960.2 | Symbols: TUA6 | Tubulin/FtsZ family protein | chr4:8548769-8550319 REVERSE LENGTH=450;AT4G14960.1 | Symbols: TUA6 | Tubulin/FtsZ family protein | chr4:8548753-8550319 REVERSE LENGTH=427
3	3	3	3	3	3	3	3	3		AT4G14880.4;AT4G14880.3;AT4G14880.2;AT4G14880.1	AT4G14880.4;AT4G14880.3;AT4G14880.2;AT4G14880.1;AT3G22460.1	AT4G14880.4 | Symbols: OASA1 | O-acetylserine (thiol) lyase (OAS-TL) isoform A1 | chr4:8518209-8520050 REVERSE LENGTH=322;AT4G14880.3 | Symbols: OASA1 | O-acetylserine (thiol) lyase (OAS-TL) isoform A1 | chr4:8518209-8520050 REVERSE LENGTH=322;AT4G14880.2
3	3	3	3	3	3	3	3	3		AT4G14800.1;AT4G14800.2	AT4G14800.1;AT4G14800.2	AT4G14800.1 | Symbols: PBD2 | 20S proteasome beta subunit D2 | chr4:8500398-8502058 FORWARD LENGTH=199;AT4G14800.2 | Symbols: PBD2 | 20S proteasome beta subunit D2 | chr4:8500398-8502058 FORWARD LENGTH=215
3	3	3	3	3	3	3	3	3		AT4G14320.1;AT3G23390.1;AT4G14320.2	AT4G14320.1;AT3G23390.1;AT4G14320.2	AT4G14320.1 | Symbols: | Zinc-binding ribosomal protein family protein | chr4:8242684-8243805 REVERSE LENGTH=105;AT3G23390.1 | Symbols: | Zinc-binding ribosomal protein family protein | chr3:8375427-8376224 FORWARD LENGTH=105;AT4G14320.2 | Symbols: | Zi
2	2	3	3	3	3	3	3	3		AT4G14210.2;AT4G14210.1	AT4G14210.2;AT4G14210.1	AT4G14210.2 | Symbols: PDS3, PDS, PDE226 | phytoene desaturase 3 | chr4:8190426-8194769 REVERSE LENGTH=566;AT4G14210.1 | Symbols: PDS3, PDS, PDE226 | phytoene desaturase 3 | chr4:8190426-8194769 REVERSE LENGTH=566
3	3	3	3	3	3	3	3	3		AT4G14160.2;AT4G14160.1;AT4G14160.3	AT4G14160.2;AT4G14160.1;AT4G14160.3	AT4G14160.2 | Symbols: | Sec23/Sec24 protein transport family protein | chr4:8167574-8173026 FORWARD LENGTH=772;AT4G14160.1 | Symbols: | Sec23/Sec24 protein transport family protein | chr4:8167574-8173026 FORWARD LENGTH=773;AT4G14160.3 | Symbols: | Sec2
3	3	3	3	3	3	3	3	3		AT4G14070.1	AT4G14070.1	AT4G14070.1 | Symbols: AAE15 | acyl-activating enzyme 15 | chr4:8112122-8118039 REVERSE LENGTH=727
3	3	3	3	3	3	3	3	3		AT4G14040.1	AT4G14040.1	AT4G14040.1 | Symbols: EDA38, SBP2 | selenium-binding protein 2 | chr4:8100691-8102828 REVERSE LENGTH=487
3	3	3	3	3	3	3	3	3		AT4G14030.2;AT4G14030.1	AT4G14030.2;AT4G14030.1	AT4G14030.2 | Symbols: SBP1 | selenium-binding protein 1 | chr4:8098121-8100165 REVERSE LENGTH=490;AT4G14030.1 | Symbols: SBP1 | selenium-binding protein 1 | chr4:8098121-8100165 REVERSE LENGTH=490
3	3	3	3	3	3	3	3	3		AT4G13940.1;AT4G13940.3;AT4G13940.2;AT4G13940.4	AT4G13940.1;AT4G13940.3;AT4G13940.2;AT4G13940.4	AT4G13940.1 | Symbols: HOG1, EMB1395, SAHH1, MEE58, ATSAHH1 | S-adenosyl-L-homocysteine hydrolase | chr4:8054931-8056676 FORWARD LENGTH=485;AT4G13940.3 | Symbols: HOG1, SAHH1 | S-adenosyl-L-homocysteine hydrolase | chr4:8054931-8056676 FORWARD LENGTH=440;A
3	3	3	3	3	3	3	3	3		AT4G13930.1	AT4G13930.1;AT4G13890.1	AT4G13930.1 | Symbols: SHM4 | serine hydroxymethyltransferase 4 | chr4:8048013-8050021 REVERSE LENGTH=471
2	3	3	3	3	3	2	3	3		AT4G13850.3;AT4G13850.2;AT4G13850.1;AT4G13850.4	AT4G13850.3;AT4G13850.2;AT4G13850.1;AT4G13850.4	AT4G13850.3 | Symbols: ATGRP2 | glycine-rich RNA-binding protein 2 | chr4:8021314-8022065 FORWARD LENGTH=144;AT4G13850.2 | Symbols: ATGRP2 | glycine-rich RNA-binding protein 2 | chr4:8021314-8022065 FORWARD LENGTH=153;AT4G13850.1 | Symbols: ATGRP2, GR-RBP2
3	3	3	3	3	3	3	3	3		AT4G13780.1	AT4G13780.1	AT4G13780.1 | Symbols: | methionine--tRNA ligase, putative / methionyl-tRNA synthetase, putative / MetRS, putative | chr4:7993366-7998433 REVERSE LENGTH=797
3	3	3	3	3	3	3	3	3		AT4G13660.1	AT4G13660.1	AT4G13660.1 | Symbols: ATPRR2, PRR2 | pinoresinol reductase 2 | chr4:7946283-7948252 FORWARD LENGTH=317
3	3	3	3	3	3	3	3	3		AT4G13430.1	AT4G13430.1	AT4G13430.1 | Symbols: IIL1, ATLEUC1 | isopropyl malate isomerase large subunit 1 | chr4:7804194-7807789 REVERSE LENGTH=509
3	3	3	3	3	3	3	3	3		AT4G13350.2;AT4G13350.1	AT4G13350.2;AT4G13350.1	AT4G13350.2 | Symbols: NIG | NSP (nuclear shuttle protein)-interacting GTPase | chr4:7770170-7773321 REVERSE LENGTH=602;AT4G13350.1 | Symbols: NIG | NSP (nuclear shuttle protein)-interacting GTPase | chr4:7770170-7773321 REVERSE LENGTH=602
3	3	3	3	3	3	3	3	3		AT4G12910.1	AT4G12910.1	AT4G12910.1 | Symbols: scpl20 | serine carboxypeptidase-like 20 | chr4:7550576-7553051 REVERSE LENGTH=497
3	3	3	3	3	3	3	3	3		AT4G12830.1	AT4G12830.1	AT4G12830.1 | Symbols: | alpha/beta-Hydrolases superfamily protein | chr4:7531189-7533327 FORWARD LENGTH=393
3	3	3	3	3	3	3	3	3		AT4G12800.1	AT4G12800.1	AT4G12800.1 | Symbols: PSAL | photosystem I subunit l | chr4:7521469-7522493 FORWARD LENGTH=219
3	3	3	3	3	3	3	3	3		AT4G12600.1;AT4G12600.2	AT4G12600.1;AT4G12600.2	AT4G12600.1 | Symbols: | Ribosomal protein L7Ae/L30e/S12e/Gadd45 family protein | chr4:7453296-7454208 FORWARD LENGTH=128;AT4G12600.2 | Symbols: | Ribosomal protein L7Ae/L30e/S12e/Gadd45 family protein | chr4:7453296-7454208 FORWARD LENGTH=183
3	3	3	3	3	3	3	3	3		AT4G12590.1	AT4G12590.1	AT4G12590.1 | Symbols: | Protein of unknown function DUF106, transmembrane | chr4:7451291-7452976 REVERSE LENGTH=246
3	3	3	3	3	3	3	3	3		AT4G12520.1;AT4G12510.1	AT4G12520.1;AT4G12510.1	AT4G12520.1 | Symbols: | Bifunctional inhibitor/lipid-transfer protein/seed storage 2S albumin superfamily protein | chr4:7421279-7421668 REVERSE LENGTH=129;AT4G12510.1 | Symbols: | Bifunctional inhibitor/lipid-transfer protein/seed storage 2S albumin su
3	3	3	3	3	3	3	3	3		AT4G12420.2;AT4G12420.1	AT4G12420.2;AT4G12420.1	AT4G12420.2 | Symbols: SKU5 | Cupredoxin superfamily protein | chr4:7349941-7352868 REVERSE LENGTH=587;AT4G12420.1 | Symbols: SKU5 | Cupredoxin superfamily protein | chr4:7349941-7352868 REVERSE LENGTH=587
3	3	3	3	3	3	3	3	3		AT4G12390.1	AT4G12390.1	AT4G12390.1 | Symbols: PME1 | pectin methylesterase inhibitor 1 | chr4:7336553-7337173 FORWARD LENGTH=206
3	3	3	3	3	3	3	3	3		AT4G11820.1;AT4G11820.2	AT4G11820.1;AT4G11820.2	AT4G11820.1 | Symbols: MVA1, HMGS, FKP1 | hydroxymethylglutaryl-CoA synthase / HMG-CoA synthase / 3-hydroxy-3-methylglutaryl coenzyme A synthase | chr4:7109124-7111213 REVERSE LENGTH=406;AT4G11820.2 | Symbols: MVA1, FKP1 | hydroxymethylglutaryl-CoA synthas
0	3	2	3	3	3	3	3	3		AT4G11790.1	AT4G11790.1	AT4G11790.1 | Symbols: | Pleckstrin homology (PH) domain superfamily protein | chr4:7090456-7093208 FORWARD LENGTH=443
3	3	2	3	3	3	3	3	3		AT4G11600.1	AT4G11600.1	AT4G11600.1 | Symbols: ATGPX6, PHGPX, LSC803, GPX6 | glutathione peroxidase 6 | chr4:7010021-7011330 REVERSE LENGTH=232
3	3	3	3	3	3	3	3	3		AT4G11420.1	AT4G11420.1	AT4G11420.1 | Symbols: EIF3A, ATEIF3A-1, EIF3A-1, ATTIF3A1, TIF3A1 | eukaryotic translation initiation factor 3A | chr4:6947834-6952053 REVERSE LENGTH=987
3	3	3	3	3	3	3	3	3		AT4G11380.1;AT4G11380.2	AT4G11380.1;AT4G11380.2	AT4G11380.1 | Symbols: | Adaptin family protein | chr4:6920608-6925444 FORWARD LENGTH=894;AT4G11380.2 | Symbols: | Adaptin family protein | chr4:6920608-6925444 FORWARD LENGTH=916
3	3	3	3	3	3	3	3	3		AT4G11260.1	AT4G11260.1;AT4G23570.2;AT4G23570.1;AT4G23570.3	AT4G11260.1 | Symbols: ATSGT1B, ETA3, RPR1, EDM1, SGT1B | phosphatase-related | chr4:6851515-6853719 REVERSE LENGTH=358
3	3	3	3	3	3	3	3	3		AT4G11150.1	AT4G11150.1;AT1G64200.1;AT3G08560.1	AT4G11150.1 | Symbols: TUF, emb2448, TUFF, VHA-E1 | vacuolar ATP synthase subunit E1 | chr4:6800091-6801696 FORWARD LENGTH=230
1	3	3	3	3	3	3	3	3		AT4G11120.1	AT4G11120.1	AT4G11120.1 | Symbols: | translation elongation factor Ts (EF-Ts), putative | chr4:6778066-6779934 FORWARD LENGTH=395
3	3	3	3	3	3	3	3	3		AT4G10840.1;AT4G10840.2	AT4G10840.1;AT4G10840.2	AT4G10840.1 | Symbols: | Tetratricopeptide repeat (TPR)-like superfamily protein | chr4:6656614-6659033 FORWARD LENGTH=609;AT4G10840.2 | Symbols: | Tetratricopeptide repeat (TPR)-like superfamily protein | chr4:6656614-6658702 FORWARD LENGTH=531
2	3	3	3	3	3	3	3	3		AT4G10790.1	AT4G10790.1	AT4G10790.1 | Symbols: | UBX domain-containing protein | chr4:6640752-6643035 REVERSE LENGTH=480
0	0	2	1	3	3	3	2	3		AT4G10760.1	AT4G10760.1	AT4G10760.1 | Symbols: EMB1706, MTA | mRNAadenosine methylase | chr4:6619947-6623312 REVERSE LENGTH=685
3	2	3	3	3	3	3	3	3		AT4G10750.1	AT4G10750.1	AT4G10750.1 | Symbols: | Phosphoenolpyruvate carboxylase family protein | chr4:6618724-6619800 FORWARD LENGTH=358
3	3	3	3	3	3	3	3	3		AT4G10710.1	AT4G10710.1;AT4G10670.1	AT4G10710.1 | Symbols: SPT16 | global transcription factor C | chr4:6602226-6605450 REVERSE LENGTH=1074
3	3	2	2	3	3	3	3	3		AT4G10480.2;AT4G10480.1	AT4G10480.2;AT4G10480.1	AT4G10480.2 | Symbols: | Nascent polypeptide-associated complex (NAC), alpha subunit family protein | chr4:6478089-6479079 REVERSE LENGTH=211;AT4G10480.1 | Symbols: | Nascent polypeptide-associated complex (NAC), alpha subunit family protein | chr4:64780
3	3	3	3	3	3	3	3	3		AT4G10450.1	AT4G10450.1	AT4G10450.1 | Symbols: | Ribosomal protein L6 family | chr4:6463201-6464458 REVERSE LENGTH=194
3	3	3	3	3	3	3	3	3		AT4G10340.1	AT4G10340.1	AT4G10340.1 | Symbols: LHCB5 | light harvesting complex of photosystem II 5 | chr4:6408200-6409496 FORWARD LENGTH=280
3	3	3	3	3	3	3	3	3		AT4G10320.1	AT4G10320.1	AT4G10320.1 | Symbols: | tRNA synthetase class I (I, L, M and V) family protein | chr4:6397526-6404509 REVERSE LENGTH=1190
3	3	3	3	3	3	3	3	3		AT4G10120.2;AT4G10120.1	AT4G10120.2;AT4G10120.1	AT4G10120.2 | Symbols: ATSPS4F | Sucrose-phosphate synthase family protein | chr4:6315033-6319785 FORWARD LENGTH=1050;AT4G10120.1 | Symbols: ATSPS4F | Sucrose-phosphate synthase family protein | chr4:6315033-6319785 FORWARD LENGTH=1050
3	3	3	3	3	3	3	3	3		AT4G09800.1;AT1G34030.1;AT1G22780.1	AT4G09800.1;AT1G34030.1;AT1G22780.1	AT4G09800.1 | Symbols: RPS18C | S18 ribosomal protein | chr4:6173818-6174963 FORWARD LENGTH=152;AT1G34030.1 | Symbols: | Ribosomal protein S13/S18 family | chr1:12370285-12371465 REVERSE LENGTH=152;AT1G22780.1 | Symbols: PFL, RPS18A, PFL1 | Ribosomal prot
3	3	3	3	3	3	3	3	3		AT4G09730.1	AT4G09730.1	AT4G09730.1 | Symbols: RH39 | RH39 | chr4:6136333-6139510 FORWARD LENGTH=621
3	3	3	3	3	3	3	3	3		AT4G09650.1	AT4G09650.1	AT4G09650.1 | Symbols: ATPD | ATP synthase delta-subunit gene | chr4:6100799-6101503 FORWARD LENGTH=234
3	3	3	3	3	3	3	3	3		AT4G09320.1	AT4G09320.1	AT4G09320.1 | Symbols: NDPK1 | Nucleoside diphosphate kinase family protein | chr4:5923424-5924366 FORWARD LENGTH=169
2	2	3	2	3	3	3	3	3		AT4G09040.2;AT4G09040.1	AT4G09040.2;AT4G09040.1	AT4G09040.2 | Symbols: | RNA-binding (RRM/RBD/RNP motifs) family protein | chr4:5795075-5797193 REVERSE LENGTH=244;AT4G09040.1 | Symbols: | RNA-binding (RRM/RBD/RNP motifs) family protein | chr4:5795075-5797315 REVERSE LENGTH=304
3	3	3	3	3	3	3	3	3		AT4G09000.1;AT4G09000.2	AT4G09000.1;AT4G09000.2;AT1G26480.1	AT4G09000.1 | Symbols: GRF1, GF14 CHI | general regulatory factor 1 | chr4:5775387-5777157 FORWARD LENGTH=267;AT4G09000.2 | Symbols: GRF1, GF14 CHI | general regulatory factor 1 | chr4:5775387-5777157 FORWARD LENGTH=318
3	3	3	3	3	3	3	3	3		AT4G08950.1	AT4G08950.1	AT4G08950.1 | Symbols: EXO | Phosphate-responsive 1 family protein | chr4:5740378-5741322 FORWARD LENGTH=314
2	3	3	3	3	3	3	3	3		AT4G08850.1;AT4G08850.2	AT4G08850.1;AT4G08850.2	AT4G08850.1 | Symbols: | Leucine-rich repeat receptor-like protein kinase family protein | chr4:5636693-5640496 REVERSE LENGTH=1045;AT4G08850.2 | Symbols: | Leucine-rich repeat receptor-like protein kinase family protein | chr4:5637467-5640496 REVERSE LE
3	3	3	3	3	3	3	3	3		AT4G08520.1;AT1G60970.1	AT4G08520.1;AT1G60970.1	AT4G08520.1 | Symbols: | SNARE-like superfamily protein | chr4:5417887-5420295 FORWARD LENGTH=181;AT1G60970.1 | Symbols: | SNARE-like superfamily protein | chr1:22448008-22449387 REVERSE LENGTH=177
3	3	3	3	3	3	3	3	3		AT4G08350.1	AT4G08350.1;AT2G34210.1;AT4G08360.1	AT4G08350.1 | Symbols: GTA02, GTA2 | global transcription factor group A2 | chr4:5286351-5292072 FORWARD LENGTH=1041
2	3	3	3	3	3	3	3	3		AT4G07410.2;AT4G07410.1	AT4G07410.2;AT4G07410.1	AT4G07410.2 | Symbols: | Transducin family protein / WD-40 repeat family protein | chr4:4201465-4204576 REVERSE LENGTH=702;AT4G07410.1 | Symbols: | Transducin family protein / WD-40 repeat family protein | chr4:4201465-4205136 REVERSE LENGTH=815
2	1	3	3	3	3	3	3	3		AT4G06634.1;AT4G06634.2;AT4G06634.3	AT4G06634.1;AT4G06634.2;AT4G06634.3	AT4G06634.1 | Symbols: | zinc finger (C2H2 type) family protein | chr4:3764499-3766439 REVERSE LENGTH=387;AT4G06634.2 | Symbols: | zinc finger (C2H2 type) family protein | chr4:3764499-3766177 REVERSE LENGTH=349;AT4G06634.3 | Symbols: | zinc finger (C2H
3	3	3	3	3	3	3	3	3		AT4G05180.1	AT4G05180.1	AT4G05180.1 | Symbols: PSBQ, PSBQ-2, PSII-Q | photosystem II subunit Q-2 | chr4:2672093-2673170 REVERSE LENGTH=230
3	3	3	3	3	3	3	3	3		AT4G04940.1	AT4G04940.1	AT4G04940.1 | Symbols: | transducin family protein / WD-40 repeat family protein | chr4:2511212-2517052 REVERSE LENGTH=910
1	1	0	2	2	3	1	3	3		AT4G04920.2;AT4G04920.1	AT4G04920.2;AT4G04920.1	AT4G04920.2 | Symbols: SFR6 | sensitive to freezing 6 | chr4:2497931-2504996 FORWARD LENGTH=1267;AT4G04920.1 | Symbols: SFR6 | sensitive to freezing 6 | chr4:2497931-2504996 FORWARD LENGTH=1278
3	3	3	3	3	3	3	3	3		AT4G04910.1	AT4G04910.1	AT4G04910.1 | Symbols: NSF | AAA-type ATPase family protein | chr4:2489696-2495666 REVERSE LENGTH=742
1	3	2	3	3	3	3	3	3		AT4G04890.1	AT4G04890.1	AT4G04890.1 | Symbols: PDF2 | protodermal factor 2 | chr4:2476970-2480090 REVERSE LENGTH=743
0	1	2	3	3	3	3	3	3		AT4G04885.1	AT4G04885.1	AT4G04885.1 | Symbols: PCFS4 | PCF11P-similar protein 4 | chr4:2472083-2475417 FORWARD LENGTH=808
3	3	3	3	3	3	3	3	3		AT4G04770.1	AT4G04770.1	AT4G04770.1 | Symbols: ATABC1, LAF6, ATNAP1, ABC1 | ATP binding cassette protein 1 | chr4:2427998-2429785 REVERSE LENGTH=557
3	3	3	3	3	3	3	3	3		AT4G04640.1	AT4G04640.1	AT4G04640.1 | Symbols: ATPC1 | ATPase, F1 complex, gamma subunit protein | chr4:2350761-2351882 REVERSE LENGTH=373
3	3	3	3	3	3	3	3	3		AT4G04460.2;AT4G04460.1	AT4G04460.2;AT4G04460.1	AT4G04460.2 | Symbols: | Saposin-like aspartyl protease family protein | chr4:2225232-2227746 FORWARD LENGTH=504;AT4G04460.1 | Symbols: | Saposin-like aspartyl protease family protein | chr4:2225232-2227746 FORWARD LENGTH=508
3	3	3	3	3	3	3	3	3		AT4G04040.1	AT4G04040.1	AT4G04040.1 | Symbols: MEE51 | Phosphofructokinase family protein | chr4:1939250-1942765 FORWARD LENGTH=569
3	3	3	2	3	3	3	3	3		AT4G03560.1	AT4G03560.1	AT4G03560.1 | Symbols: ATTPC1, TPC1, ATCCH1, FOU2 | two-pore channel 1 | chr4:1580253-1585691 FORWARD LENGTH=733
3	3	3	3	3	3	3	3	3		AT4G03550.1	AT4G03550.1;AT5G36870.1	AT4G03550.1 | Symbols: ATGSL05, GSL05, ATGSL5, PMR4, GSL5 | glucan synthase-like 5 | chr4:1573513-1579195 FORWARD LENGTH=1780
3	3	3	3	3	3	3	3	3		AT4G03520.2;AT4G03520.1	AT4G03520.2;AT4G03520.1	AT4G03520.2 | Symbols: ATHM2 | Thioredoxin superfamily protein | chr4:1562585-1562803 REVERSE LENGTH=72;AT4G03520.1 | Symbols: ATHM2 | Thioredoxin superfamily protein | chr4:1562585-1564055 REVERSE LENGTH=186
3	3	3	3	3	3	3	3	3		AT4G03280.2;AT4G03280.1	AT4G03280.2;AT4G03280.1	AT4G03280.2 | Symbols: PETC, PGR1 | photosynthetic electron transfer C | chr4:1440462-1441717 FORWARD LENGTH=210;AT4G03280.1 | Symbols: PETC, PGR1 | photosynthetic electron transfer C | chr4:1440314-1441717 FORWARD LENGTH=229
2	1	2	3	3	3	3	3	3		AT4G03200.2;AT4G03200.1	AT4G03200.2;AT4G03200.1	AT4G03200.2 | Symbols: | catalytics | chr4:1409318-1412566 FORWARD LENGTH=685;AT4G03200.1 | Symbols: | catalytics | chr4:1408296-1412566 FORWARD LENGTH=818
3	3	3	3	3	3	3	3	3		AT4G03190.1	AT4G03190.1	AT4G03190.1 | Symbols: GRH1, ATGRH1, AFB1 | GRR1-like protein 1 | chr4:1405108-1407057 REVERSE LENGTH=585
3	3	3	3	3	3	3	3	3		AT4G03020.2;AT4G03020.1	AT4G03020.2;AT4G03020.1	AT4G03020.2 | Symbols: | transducin family protein / WD-40 repeat family protein | chr4:1331704-1334472 REVERSE LENGTH=493;AT4G03020.1 | Symbols: | transducin family protein / WD-40 repeat family protein | chr4:1331704-1334472 REVERSE LENGTH=493
3	3	3	3	3	3	3	3	3		AT4G02930.1	AT4G02930.1	AT4G02930.1 | Symbols: | GTP binding Elongation factor Tu family protein | chr4:1295751-1298354 REVERSE LENGTH=454
3	3	3	3	3	3	3	3	3		AT4G02840.1;AT4G02840.2	AT4G02840.1;AT4G02840.2	AT4G02840.1 | Symbols: | Small nuclear ribonucleoprotein family protein | chr4:1264726-1266253 FORWARD LENGTH=116;AT4G02840.2 | Symbols: | Small nuclear ribonucleoprotein family protein | chr4:1264726-1266253 FORWARD LENGTH=126
3	3	3	2	3	3	3	3	3		AT4G02720.1	AT4G02720.1	AT4G02720.1 | Symbols: | unknown protein;FUNCTIONS IN: molecular_function unknown;INVOLVED IN: biological_process unknown;EXPRESSED IN: 25 plant structures;EXPRESSED DURING: 14 growth stages;CONTAINS InterPro DOMAIN/s: Protein of unknown function DUF
2	3	3	0	1	3	1	1	3		AT4G02580.1	AT4G02580.1	AT4G02580.1 | Symbols: | NADH-ubiquinone oxidoreductase 24 kDa subunit, putative | chr4:1134586-1136906 FORWARD LENGTH=255
3	3	3	3	3	3	3	3	3		AT4G02520.1;AT2G02930.1	AT4G02520.1;AT2G02930.1	AT4G02520.1 | Symbols: ATGSTF2, ATPM24.1, ATPM24, GST2, GSTF2 | glutathione S-transferase PHI 2 | chr4:1110673-1111531 REVERSE LENGTH=212;AT2G02930.1 | Symbols: ATGSTF3, GST16, GSTF3 | glutathione S-transferase F3 | chr2:851348-852106 REVERSE LENGTH=212
3	3	3	3	3	3	3	3	3		AT4G02510.1	AT4G02510.1	AT4G02510.1 | Symbols: TOC159, TOC86, PPI2, TOC160, ATTOC159 | translocon at the outer envelope membrane of chloroplasts 159 | chr4:1104766-1109360 FORWARD LENGTH=1503
3	3	3	3	3	3	2	3	3		AT4G02480.1	AT4G02480.1;AT1G02890.1;AT1G02890.2;AT1G62130.1;AT4G24860.1	AT4G02480.1 | Symbols: | AAA-type ATPase family protein | chr4:1082082-1088680 REVERSE LENGTH=1265
3	3	3	3	3	3	3	3	3		AT4G02450.2;AT4G02450.1	AT4G02450.2;AT4G02450.1	AT4G02450.2 | Symbols: | HSP20-like chaperones superfamily protein | chr4:1073987-1075765 REVERSE LENGTH=240;AT4G02450.1 | Symbols: | HSP20-like chaperones superfamily protein | chr4:1073987-1075765 REVERSE LENGTH=241
3	3	3	3	3	3	3	3	3		AT4G02350.1	AT4G02350.1	AT4G02350.1 | Symbols: SEC15B | exocyst complex component sec15B | chr4:1038157-1040571 FORWARD LENGTH=787
3	3	3	3	3	3	3	3	3		AT4G02340.1	AT4G02340.1	AT4G02340.1 | Symbols: | alpha/beta-Hydrolases superfamily protein | chr4:1035722-1037403 FORWARD LENGTH=324
3	3	3	3	3	3	3	3	3		AT4G02230.1	AT4G02230.1	AT4G02230.1 | Symbols: | Ribosomal protein L19e family protein | chr4:979391-980640 REVERSE LENGTH=208
3	3	3	3	3	3	3	3	3		AT4G01900.1	AT4G01900.1	AT4G01900.1 | Symbols: PII, GLB1 | GLNB1 homolog | chr4:821736-823294 FORWARD LENGTH=196
3	3	3	3	3	3	3	3	3		AT4G01850.2;AT4G01850.1	AT4G01850.2;AT4G01850.1	AT4G01850.2 | Symbols: SAM-2, MAT2, SAM2, AtSAM2 | S-adenosylmethionine synthetase 2 | chr4:796298-797479 REVERSE LENGTH=393;AT4G01850.1 | Symbols: SAM-2, MAT2, SAM2, AtSAM2 | S-adenosylmethionine synthetase 2 | chr4:796298-797479 REVERSE LENGTH=393
3	3	3	3	3	3	3	3	3		AT4G01800.1;AT4G01800.2	AT4G01800.1;AT4G01800.2	AT4G01800.1 | Symbols: AGY1, AtcpSecA, SECA1 | Albino or Glassy Yellow 1 | chr4:770926-776131 REVERSE LENGTH=1022;AT4G01800.2 | Symbols: AGY1, SECA1 | Albino or Glassy Yellow 1 | chr4:770926-776134 REVERSE LENGTH=1042
3	3	3	3	3	3	3	3	3		AT4G01700.1	AT4G01700.1	AT4G01700.1 | Symbols: | Chitinase family protein | chr4:732413-733487 REVERSE LENGTH=280
3	3	3	3	3	3	3	3	3		AT4G01690.1;AT4G01690.2	AT4G01690.1;AT4G01690.2	AT4G01690.1 | Symbols: PPOX, HEMG1, PPO1 | Flavin containing amine oxidoreductase family | chr4:729929-732309 FORWARD LENGTH=537;AT4G01690.2 | Symbols: PPOX | Flavin containing amine oxidoreductase family | chr4:729929-732309 FORWARD LENGTH=506
3	3	3	3	3	3	3	3	3		AT4G01610.2;AT4G01610.1	AT4G01610.2;AT4G01610.1	AT4G01610.2 | Symbols: | Cysteine proteinases superfamily protein | chr4:694857-696937 FORWARD LENGTH=359;AT4G01610.1 | Symbols: | Cysteine proteinases superfamily protein | chr4:694857-696937 FORWARD LENGTH=359
3	3	3	3	3	3	3	2	3		AT4G01370.1	AT4G01370.1;AT2G46070.2;AT2G46070.1	AT4G01370.1 | Symbols: ATMPK4, MPK4 | MAP kinase 4 | chr4:567219-568889 FORWARD LENGTH=376
2	3	3	3	3	3	3	3	3		AT4G01330.1;AT4G01330.2;AT1G01540.2;AT4G02630.1	AT4G01330.1;AT4G01330.2;AT1G01540.2;AT4G02630.1;AT1G01540.1;AT4G32710.1;AT3G58690.1;AT4G34500.1;AT1G54820.1;AT5G24080.1;AT1G56720.3;AT1G56720.2;AT1G56720.1;AT1G31420.2;AT1G31420.1;AT5G62710.1;AT1G66920.1;AT1G66920.2;AT5G38260.1;AT1G66910.1;AT1G66930.1;AT5G39030.1;AT4G00340.1;AT1G34300.1;AT1G67000.1;AT1G56140.1;AT1G56120.1;AT1G66980.1	AT4G01330.1 | Symbols: | Protein kinase superfamily protein | chr4:550723-552847 FORWARD LENGTH=479;AT4G01330.2 | Symbols: | Protein kinase superfamily protein | chr4:550723-552847 FORWARD LENGTH=480;AT1G01540.2 | Symbols: | Protein kinase superfamily p
3	3	3	3	3	3	3	3	3		AT4G01310.1	AT4G01310.1	AT4G01310.1 | Symbols: | Ribosomal L5P family protein | chr4:544166-545480 REVERSE LENGTH=262
3	3	3	3	3	3	3	3	3		AT4G01100.1;AT4G01100.2	AT4G01100.1;AT4G01100.2;AT4G26180.1;AT1G14560.1	AT4G01100.1 | Symbols: ADNT1 | adenine nucleotide transporter 1 | chr4:477411-479590 FORWARD LENGTH=352;AT4G01100.2 | Symbols: ADNT1 | adenine nucleotide transporter 1 | chr4:477411-479590 FORWARD LENGTH=366
0	3	2	3	3	3	3	3	3		AT4G01050.1	AT4G01050.1	AT4G01050.1 | Symbols: TROL | thylakoid rhodanese-like | chr4:455874-458175 FORWARD LENGTH=466
3	3	3	3	3	3	3	3	3		AT4G01037.1	AT4G01037.1	AT4G01037.1 | Symbols: WTF1, AtWTF1 | Ubiquitin carboxyl-terminal hydrolase family protein | chr4:451444-453030 REVERSE LENGTH=528
2	2	2	1	2	3	2	2	2		AT4G00830.4;AT4G00830.2;AT4G00830.1;AT4G00830.3	AT4G00830.4;AT4G00830.2;AT4G00830.1;AT4G00830.3	AT4G00830.4 | Symbols: | RNA-binding (RRM/RBD/RNP motifs) family protein | chr4:352782-354965 FORWARD LENGTH=495;AT4G00830.2 | Symbols: | RNA-binding (RRM/RBD/RNP motifs) family protein | chr4:352782-354965 FORWARD LENGTH=495;AT4G00830.1 | Symbols: | RN
2	3	2	3	3	3	2	3	3		AT4G00730.2;AT4G00730.1	AT4G00730.2;AT4G00730.1	AT4G00730.2 | Symbols: ANL2, AHDP | Homeobox-leucine zipper family protein / lipid-binding START domain-containing protein | chr4:301071-304103 REVERSE LENGTH=570;AT4G00730.1 | Symbols: ANL2, AHDP | Homeobox-leucine zipper family protein / lipid-binding ST
3	3	3	3	3	3	3	3	3		AT4G00660.2;AT4G00660.1	AT4G00660.2;AT4G00660.1	AT4G00660.2 | Symbols: RH8, ATRH8 | RNAhelicase-like 8 | chr4:274638-277438 FORWARD LENGTH=505;AT4G00660.1 | Symbols: RH8, ATRH8 | RNAhelicase-like 8 | chr4:274638-277438 FORWARD LENGTH=505
3	3	3	3	3	3	3	3	3		AT4G00620.1	AT4G00620.1;AT4G00600.1	AT4G00620.1 | Symbols: | Amino acid dehydrogenase family protein | chr4:259265-260788 REVERSE LENGTH=360
3	3	3	3	3	3	3	3	3		AT4G00570.1	AT4G00570.1	AT4G00570.1 | Symbols: NAD-ME2 | NAD-dependent malic enzyme 2 | chr4:242817-246522 REVERSE LENGTH=607
0	3	3	3	3	3	3	3	3		AT4G00450.1	AT4G00450.1	AT4G00450.1 | Symbols: CRP, CCT | RNA polymerase II transcription mediators | chr4:202425-210666 FORWARD LENGTH=2253
3	3	3	3	3	3	3	3	3		AT4G00430.1;AT4G00430.2	AT4G00430.1;AT4G00430.2	AT4G00430.1 | Symbols: TMP-C, PIP1;4, PIP1E | plasma membrane intrinsic protein 1;4 | chr4:186143-187531 REVERSE LENGTH=287;AT4G00430.2 | Symbols: TMP-C, PIP1;4, PIP1E | plasma membrane intrinsic protein 1;4 | chr4:186569-187531 REVERSE LENGTH=219
3	3	3	3	3	3	3	3	3		AT4G00360.1	AT4G00360.1;AT1G01600.1	AT4G00360.1 | Symbols: CYP86A2, ATT1 | cytochrome P450, family 86, subfamily A, polypeptide 2 | chr4:160951-162778 FORWARD LENGTH=553
3	3	3	3	3	3	3	3	3		AT4G00238.1	AT4G00238.1;AT1G11510.1	AT4G00238.1 | Symbols: | DNA-binding storekeeper protein-related transcriptional regulator | chr4:104092-105129 REVERSE LENGTH=345
3	3	3	3	3	3	3	3	3		AT4G00090.1	AT4G00090.1	AT4G00090.1 | Symbols: | Transducin/WD40 repeat-like superfamily protein | chr4:34234-36594 FORWARD LENGTH=430
2	3	3	2	3	3	2	3	3		AT3G63500.2;AT3G63500.1	AT3G63500.2;AT3G63500.1	AT3G63500.2 | Symbols: | Protein of unknown function (DUF1423) | chr3:23446331-23449991 REVERSE LENGTH=1162;AT3G63500.1 | Symbols: | Protein of unknown function (DUF1423) | chr3:23446331-23449166 REVERSE LENGTH=887
3	3	3	3	3	3	3	3	3		AT3G63490.1;AT3G63490.2	AT3G63490.1;AT3G63490.2	AT3G63490.1 | Symbols: | Ribosomal protein L1p/L10e family | chr3:23444269-23446020 FORWARD LENGTH=346;AT3G63490.2 | Symbols: | Ribosomal protein L1p/L10e family | chr3:23444269-23445777 FORWARD LENGTH=291
3	3	3	3	3	3	3	3	3		AT3G63460.1;AT3G63460.3	AT3G63460.1;AT3G63460.3	AT3G63460.1 | Symbols: | transducin family protein / WD-40 repeat family protein | chr3:23431009-23437241 REVERSE LENGTH=1104;AT3G63460.3 | Symbols: | transducin family protein / WD-40 repeat family protein | chr3:23431009-23437241 REVERSE LENGTH=1094
3	3	3	3	3	3	3	3	3		AT3G63410.1	AT3G63410.1	AT3G63410.1 | Symbols: APG1, VTE3, IEP37, E37 | S-adenosyl-L-methionine-dependent methyltransferases superfamily protein | chr3:23415816-23417002 REVERSE LENGTH=338
3	3	3	3	3	3	3	3	3		AT3G63400.3;AT3G63400.1;AT3G63400.2	AT3G63400.3;AT3G63400.1;AT3G63400.2	AT3G63400.3 | Symbols: | Cyclophilin-like peptidyl-prolyl cis-trans isomerase family protein | chr3:23412449-23415435 FORWARD LENGTH=570;AT3G63400.1 | Symbols: | Cyclophilin-like peptidyl-prolyl cis-trans isomerase family protein | chr3:23412449-23415435
3	3	3	3	3	3	3	3	3		AT3G63260.1;AT3G63260.2	AT3G63260.1;AT3G63260.2	AT3G63260.1 | Symbols: ATMRK1 | Protein kinase superfamily protein | chr3:23373090-23374747 REVERSE LENGTH=391;AT3G63260.2 | Symbols: ATMRK1 | Protein kinase superfamily protein | chr3:23373327-23374747 REVERSE LENGTH=344
3	3	3	3	3	3	3	3	3		AT3G63170.1	AT3G63170.1	AT3G63170.1 | Symbols: | Chalcone-flavanone isomerase family protein | chr3:23334675-23335993 FORWARD LENGTH=279
3	3	3	3	3	3	3	3	3		AT3G63140.1	AT3G63140.1	AT3G63140.1 | Symbols: CSP41A | chloroplast stem-loop binding protein of 41 kDa | chr3:23327006-23328620 REVERSE LENGTH=406
0	2	3	2	3	3	3	3	3		AT3G63070.1	AT3G63070.1	AT3G63070.1 | Symbols: | Tudor/PWWP/MBT domain-containing protein | chr3:23302667-23309575 FORWARD LENGTH=1347
3	3	3	3	3	3	3	3	3		AT3G62910.1	AT3G62910.1	AT3G62910.1 | Symbols: APG3 | Peptide chain release factor 1 | chr3:23257661-23260386 REVERSE LENGTH=422
3	3	3	3	3	3	3	3	3		AT3G62870.1	AT3G62870.1	AT3G62870.1 | Symbols: | Ribosomal protein L7Ae/L30e/S12e/Gadd45 family protein | chr3:23242862-23244273 REVERSE LENGTH=256
3	3	3	3	3	3	3	3	3		AT3G62840.1;AT2G47640.4;AT2G47640.1;AT3G62840.2;AT2G47640.3;AT2G47640.2	AT3G62840.1;AT2G47640.4;AT2G47640.1;AT3G62840.2;AT2G47640.3;AT2G47640.2	AT3G62840.1 | Symbols: | Small nuclear ribonucleoprotein family protein | chr3:23235727-23236615 REVERSE LENGTH=109;AT2G47640.4 | Symbols: | Small nuclear ribonucleoprotein family protein | chr2:19537393-19538431 FORWARD LENGTH=109;AT2G47640.1 | Symbols:
3	3	3	3	3	3	3	3	3		AT3G62830.2;AT3G62830.1;AT2G47650.1;AT2G47650.2	AT3G62830.2;AT3G62830.1;AT2G47650.1;AT2G47650.2	AT3G62830.2 | Symbols: UXS2, ATUXS2 | NAD(P)-binding Rossmann-fold superfamily protein | chr3:23232539-23235353 FORWARD LENGTH=445;AT3G62830.1 | Symbols: UXS2, ATUXS2, AUD1 | NAD(P)-binding Rossmann-fold superfamily protein | chr3:23232539-23235353 FORWARD
3	3	3	3	3	3	3	3	3		AT3G62730.1	AT3G62730.1	AT3G62730.1 | Symbols: | unknown protein;FUNCTIONS IN: molecular_function unknown;INVOLVED IN: biological_process unknown;LOCATED IN: endomembrane system;EXPRESSED IN: 13 plant structures;EXPRESSED DURING: LP.04 four leaves visible, 4 anthesis, LP.02
3	3	3	3	3	3	3	3	3		AT3G62700.1	AT3G62700.1;AT2G47800.1	AT3G62700.1 | Symbols: ATMRP10, MRP10, ABCC14 | multidrug resistance-associated protein 10 | chr3:23190428-23195727 REVERSE LENGTH=1539
3	3	3	3	3	3	3	3	3		AT3G62530.1	AT3G62530.1	AT3G62530.1 | Symbols: | ARM repeat superfamily protein | chr3:23132219-23133121 FORWARD LENGTH=221
2	3	2	2	3	3	3	2	2		AT3G62360.1	AT3G62360.1	AT3G62360.1 | Symbols: | Carbohydrate-binding-like fold | chr3:23073020-23080455 REVERSE LENGTH=1227
3	3	3	3	3	3	3	3	3		AT3G62330.1	AT3G62330.1	AT3G62330.1 | Symbols: | Zinc knuckle (CCHC-type) family protein | chr3:23063329-23065419 REVERSE LENGTH=479
3	3	3	3	3	3	3	3	3		AT3G62310.1	AT3G62310.1	AT3G62310.1 | Symbols: | RNA helicase family protein | chr3:23057516-23060561 REVERSE LENGTH=726
3	3	3	3	3	3	3	3	3		AT3G62250.1	AT3G62250.1	AT3G62250.1 | Symbols: UBQ5 | ubiquitin 5 | chr3:23037138-23037611 FORWARD LENGTH=157
3	3	3	3	3	3	3	3	3		AT3G62120.2;AT3G62120.1	AT3G62120.2;AT3G62120.1	AT3G62120.2 | Symbols: | Class II aaRS and biotin synthetases superfamily protein | chr3:23001227-23003849 REVERSE LENGTH=530;AT3G62120.1 | Symbols: | Class II aaRS and biotin synthetases superfamily protein | chr3:23001227-23003849 REVERSE LENGTH=530
3	3	3	3	3	3	3	3	3		AT3G62030.3;AT3G62030.1;AT3G62030.2	AT3G62030.3;AT3G62030.1;AT3G62030.2	AT3G62030.3 | Symbols: ROC4 | rotamase CYP 4 | chr3:22973708-22975139 FORWARD LENGTH=259;AT3G62030.1 | Symbols: ROC4 | rotamase CYP 4 | chr3:22973708-22975139 FORWARD LENGTH=260;AT3G62030.2 | Symbols: ROC4 | rotamase CYP 4 | chr3:22973004-22975139 FORWARD
3	3	3	3	3	3	3	3	3		AT3G62010.2;AT3G62010.1	AT3G62010.2;AT3G62010.1	AT3G62010.2 | Symbols: | unknown protein;LOCATED IN: cellular_component unknown;EXPRESSED IN: 23 plant structures;EXPRESSED DURING: 15 growth stages. | chr3:22964945-22971149 FORWARD LENGTH=1251;AT3G62010.1 | Symbols: | unknown protein;LOCATED IN: ce
3	3	3	3	3	3	3	3	3		AT3G61870.2;AT3G61870.1	AT3G61870.2;AT3G61870.1	AT3G61870.2 | Symbols: | unknown protein;FUNCTIONS IN: molecular_function unknown;INVOLVED IN: biological_process unknown;LOCATED IN: chloroplast, chloroplast inner membrane;EXPRESSED IN: 23 plant structures;EXPRESSED DURING: 14 growth stages;Has 35
3	3	3	3	3	3	3	3	3		AT3G61860.1	AT3G61860.1;AT2G46610.2;AT2G46610.1	AT3G61860.1 | Symbols: ATRSP31, RSP31, At-RS31, RS31 | RNA-binding (RRM/RBD/RNP motifs) family protein | chr3:22900311-22902159 REVERSE LENGTH=264
3	3	3	3	3	3	3	3	3		AT3G61820.1	AT3G61820.1	AT3G61820.1 | Symbols: | Eukaryotic aspartyl protease family protein | chr3:22880074-22881525 REVERSE LENGTH=483
3	3	3	3	3	3	3	3	3		AT3G61690.1	AT3G61690.1	AT3G61690.1 | Symbols: | nucleotidyltransferases | chr3:22828349-22833477 FORWARD LENGTH=1303
3	3	3	3	3	3	3	3	3		AT3G61470.1	AT3G61470.1	AT3G61470.1 | Symbols: LHCA2 | photosystem I light harvesting complex gene 2 | chr3:22745736-22747032 FORWARD LENGTH=257
3	3	3	3	3	3	3	3	3		AT3G61440.1;AT3G61440.2;AT3G61440.3	AT3G61440.1;AT3G61440.2;AT3G61440.3	AT3G61440.1 | Symbols: ATCYSC1, ARATH;BSAS3;1, CYSC1 | cysteine synthase C1 | chr3:22735885-22737792 FORWARD LENGTH=368;AT3G61440.2 | Symbols: ATCYSC1, CYSC1 | cysteine synthase C1 | chr3:22736383-22737792 FORWARD LENGTH=272;AT3G61440.3 | Symbols: CYSC1 |
3	3	3	3	3	3	3	3	3		AT3G61430.2;AT3G61430.1	AT3G61430.2;AT3G61430.1	AT3G61430.2 | Symbols: PIP1A, ATPIP1, PIP1, PIP1;1 | plasma membrane intrinsic protein 1A | chr3:22733657-22735113 FORWARD LENGTH=286;AT3G61430.1 | Symbols: PIP1A, ATPIP1, PIP1, PIP1;1 | plasma membrane intrinsic protein 1A | chr3:22733657-22735113 FORWARD
3	3	3	3	3	3	3	3	3		AT3G61240.2;AT3G61240.1	AT3G61240.2;AT3G61240.1	AT3G61240.2 | Symbols: | DEA(D/H)-box RNA helicase family protein | chr3:22666590-22669154 FORWARD LENGTH=498;AT3G61240.1 | Symbols: | DEA(D/H)-box RNA helicase family protein | chr3:22666590-22669154 FORWARD LENGTH=498
3	3	3	3	3	3	3	3	3		AT3G61220.1;AT3G61220.2	AT3G61220.1;AT3G61220.2;AT2G24190.1;AT2G24190.2	AT3G61220.1 | Symbols: | NAD(P)-binding Rossmann-fold superfamily protein | chr3:22663025-22664316 FORWARD LENGTH=296;AT3G61220.2 | Symbols: | NAD(P)-binding Rossmann-fold superfamily protein | chr3:22663025-22664316 FORWARD LENGTH=303
1	1	2	2	3	3	3	3	3		AT3G61150.1	AT3G61150.1	AT3G61150.1 | Symbols: HDG1, HD-GL2-1 | homeodomain GLABROUS 1 | chr3:22630769-22634875 FORWARD LENGTH=808
3	3	3	3	3	3	3	3	3		AT3G61110.1;AT2G45710.1	AT3G61110.1;AT2G45710.1;AT3G61111.1	AT3G61110.1 | Symbols: ARS27A, RS27A | ribosomal protein S27 | chr3:22611710-22612632 FORWARD LENGTH=86;AT2G45710.1 | Symbols: | Zinc-binding ribosomal protein family protein | chr2:18831243-18831999 FORWARD LENGTH=84
3	3	3	3	3	3	3	3	3		AT3G61070.3;AT3G61070.2;AT3G61070.1	AT3G61070.3;AT3G61070.2;AT3G61070.1;AT1G01820.1	AT3G61070.3 | Symbols: PEX11E | peroxin 11E | chr3:22604873-22606159 REVERSE LENGTH=231;AT3G61070.2 | Symbols: PEX11E | peroxin 11E | chr3:22604873-22606159 REVERSE LENGTH=231;AT3G61070.1 | Symbols: PEX11E | peroxin 11E | chr3:22604873-22606159 REVERSE LEN
3	3	3	3	3	3	3	3	3		AT3G61050.2;AT3G61050.1	AT3G61050.2;AT3G61050.1;AT3G61030.1;AT3G60950.1	AT3G61050.2 | Symbols: NTMC2TYPE4, NTMC2T4 | Calcium-dependent lipid-binding (CaLB domain) family protein | chr3:22597485-22600932 FORWARD LENGTH=510;AT3G61050.1 | Symbols: NTMC2TYPE4, NTMC2T4 | Calcium-dependent lipid-binding (CaLB domain) family protein
3	3	3	3	3	3	3	3	3		AT3G60860.1	AT3G60860.1	AT3G60860.1 | Symbols: | SEC7-like guanine nucleotide exchange family protein | chr3:22484804-22491510 FORWARD LENGTH=1793
3	3	3	3	2	3	3	3	3		AT3G60830.1	AT3G60830.1	AT3G60830.1 | Symbols: ATARP7, ARP7 | actin-related protein 7 | chr3:22474298-22476000 FORWARD LENGTH=363
3	3	3	3	3	3	3	3	3		AT3G60820.3;AT3G60820.2;AT3G60820.1	AT3G60820.3;AT3G60820.2;AT3G60820.1	AT3G60820.3 | Symbols: PBF1 | N-terminal nucleophile aminohydrolases (Ntn hydrolases) superfamily protein | chr3:22472038-22473809 REVERSE LENGTH=223;AT3G60820.2 | Symbols: PBF1 | N-terminal nucleophile aminohydrolases (Ntn hydrolases) superfamily protein
3	3	3	3	3	3	3	3	3		AT3G60770.1	AT3G60770.1	AT3G60770.1 | Symbols: | Ribosomal protein S13/S15 | chr3:22460525-22461656 REVERSE LENGTH=151
3	3	3	3	3	3	3	3	3		AT3G60750.2;AT3G60750.1	AT3G60750.2;AT3G60750.1	AT3G60750.2 | Symbols: | Transketolase | chr3:22454004-22456824 FORWARD LENGTH=740;AT3G60750.1 | Symbols: | Transketolase | chr3:22454004-22456824 FORWARD LENGTH=741
3	3	3	3	3	3	3	3	3		AT3G60730.1	AT3G60730.1	AT3G60730.1 | Symbols: | Plant invertase/pectin methylesterase inhibitor superfamily | chr3:22444955-22447226 FORWARD LENGTH=519
3	3	3	3	3	3	3	3	3		AT3G60370.1	AT3G60370.1	AT3G60370.1 | Symbols: | FKBP-like peptidyl-prolyl cis-trans isomerase family protein | chr3:22315000-22316533 REVERSE LENGTH=242
3	3	3	3	3	3	3	3	3		AT3G60250.2;AT3G60250.1;AT2G44680.2;AT2G44680.1	AT3G60250.2;AT3G60250.1;AT2G44680.2;AT2G44680.1	AT3G60250.2 | Symbols: CKB3 | casein kinase II beta chain 3 | chr3:22270714-22271962 REVERSE LENGTH=275;AT3G60250.1 | Symbols: CKB3 | casein kinase II beta chain 3 | chr3:22270714-22271962 REVERSE LENGTH=276;AT2G44680.2 | Symbols: CKB4 | casein kinase II
3	3	3	3	3	3	3	3	3		AT3G60245.1	AT3G60245.1;AT3G10950.1	AT3G60245.1 | Symbols: | Zinc-binding ribosomal protein family protein | chr3:22268803-22269750 FORWARD LENGTH=92
3	3	3	3	3	3	3	3	3		AT3G60240.3;AT3G60240.4;AT3G60240.2	AT3G60240.3;AT3G60240.4;AT3G60240.2	AT3G60240.3 | Symbols: EIF4G, CUM2 | eukaryotic translation initiation factor 4G | chr3:22261842-22268295 FORWARD LENGTH=1725;AT3G60240.4 | Symbols: EIF4G, CUM2 | eukaryotic translation initiation factor 4G | chr3:22261842-22268295 FORWARD LENGTH=1727;AT3G
3	3	3	3	3	3	3	3	3		AT3G60190.1	AT3G60190.1	AT3G60190.1 | Symbols: ADL4, ADLP2, EDR3, DRP1E, ADL1E, DL1E | DYNAMIN-like 1E | chr3:22244367-22247651 REVERSE LENGTH=624
3	3	3	3	3	3	3	3	3		AT3G59990.4;AT3G59990.3;AT3G59990.2;AT3G59990.1	AT3G59990.4;AT3G59990.3;AT3G59990.2;AT3G59990.1;AT2G44180.1	AT3G59990.4 | Symbols: MAP2B | methionine aminopeptidase 2B | chr3:22155921-22158551 REVERSE LENGTH=439;AT3G59990.3 | Symbols: MAP2B | methionine aminopeptidase 2B | chr3:22155921-22158551 REVERSE LENGTH=439;AT3G59990.2 | Symbols: MAP2B | methionine aminop
3	3	3	3	3	3	3	3	3		AT3G59970.3;AT3G59970.2;AT3G59970.1	AT3G59970.3;AT3G59970.2;AT3G59970.1	AT3G59970.3 | Symbols: MTHFR1 | methylenetetrahydrofolate reductase 1 | chr3:22151303-22154323 FORWARD LENGTH=592;AT3G59970.2 | Symbols: MTHFR1 | methylenetetrahydrofolate reductase 1 | chr3:22151303-22153989 FORWARD LENGTH=407;AT3G59970.1 | Symbols: MTHFR
3	3	3	3	3	3	3	3	3		AT3G59920.1	AT3G59920.1	AT3G59920.1 | Symbols: ATGDI2, GDI2 | RAB GDP dissociation inhibitor 2 | chr3:22135157-22138221 FORWARD LENGTH=444
3	3	3	3	3	3	3	3	3		AT3G59780.1	AT3G59780.1	AT3G59780.1 | Symbols: | Rhodanese/Cell cycle control phosphatase superfamily protein | chr3:22086906-22090324 FORWARD LENGTH=686
3	3	3	3	3	3	3	3	3		AT3G59770.1;AT3G59770.3;AT3G59770.2	AT3G59770.1;AT3G59770.3;AT3G59770.2	AT3G59770.1 | Symbols: SAC9 | sacI homology domain-containing protein / WW domain-containing protein | chr3:22079281-22085674 REVERSE LENGTH=1630;AT3G59770.3 | Symbols: SAC9 | sacI homology domain-containing protein / WW domain-containing protein | chr3:22
3	3	3	3	3	3	3	3	3		AT3G59540.1;AT2G43460.1	AT3G59540.1;AT2G43460.1	AT3G59540.1 | Symbols: | Ribosomal L38e protein family | chr3:21995897-21996742 REVERSE LENGTH=69;AT2G43460.1 | Symbols: | Ribosomal L38e protein family | chr2:18046285-18047292 REVERSE LENGTH=69
3	3	3	3	3	3	3	3	3		AT3G59350.2;AT3G59350.3;AT3G59350.1	AT3G59350.2;AT3G59350.3;AT3G59350.1	AT3G59350.2 | Symbols: | Protein kinase superfamily protein | chr3:21933392-21934883 FORWARD LENGTH=366;AT3G59350.3 | Symbols: | Protein kinase superfamily protein | chr3:21932930-21934883 FORWARD LENGTH=408;AT3G59350.1 | Symbols: | Protein kinase super
3	3	3	3	3	3	3	3	3		AT3G59040.1;AT3G59040.2	AT3G59040.1;AT3G59040.2	AT3G59040.1 | Symbols: | Tetratricopeptide repeat (TPR)-like superfamily protein | chr3:21821495-21824233 REVERSE LENGTH=583;AT3G59040.2 | Symbols: | Tetratricopeptide repeat (TPR)-like superfamily protein | chr3:21821495-21823919 REVERSE LENGTH=590
3	3	3	3	3	3	3	3	3		AT3G58750.1	AT3G58750.1	AT3G58750.1 | Symbols: CSY2 | citrate synthase 2 | chr3:21724564-21727458 REVERSE LENGTH=514
3	3	3	3	3	3	3	3	3		AT3G58730.1	AT3G58730.1	AT3G58730.1 | Symbols: | vacuolar ATP synthase subunit D (VATD) / V-ATPase D subunit / vacuolar proton pump D subunit (VATPD) | chr3:21718495-21719280 REVERSE LENGTH=261
3	3	3	3	3	3	3	3	3		AT3G58660.1	AT3G58660.1;AT2G42650.1	AT3G58660.1 | Symbols: | Ribosomal protein L1p/L10e family | chr3:21701574-21702914 FORWARD LENGTH=446
3	3	3	3	3	3	3	3	3		AT3G58610.3;AT3G58610.2;AT3G58610.1	AT3G58610.3;AT3G58610.2;AT3G58610.1	AT3G58610.3 | Symbols: | ketol-acid reductoisomerase | chr3:21671561-21674639 FORWARD LENGTH=591;AT3G58610.2 | Symbols: | ketol-acid reductoisomerase | chr3:21671561-21674639 FORWARD LENGTH=591;AT3G58610.1 | Symbols: | ketol-acid reductoisomerase | chr3
3	3	3	3	3	3	3	3	3		AT3G58570.1	AT3G58570.1	AT3G58570.1 | Symbols: | P-loop containing nucleoside triphosphate hydrolases superfamily protein | chr3:21657099-21660352 FORWARD LENGTH=646
3	2	2	2	3	3	3	2	3		AT3G58560.1	AT3G58560.1;AT3G58580.1	AT3G58560.1 | Symbols: | DNAse I-like superfamily protein | chr3:21650880-21653896 REVERSE LENGTH=602
3	3	3	3	3	3	3	3	3		AT3G58510.3;AT3G58510.2;AT3G58510.1	AT3G58510.3;AT3G58510.2;AT3G58510.1	AT3G58510.3 | Symbols: | DEA(D/H)-box RNA helicase family protein | chr3:21640608-21643464 FORWARD LENGTH=612;AT3G58510.2 | Symbols: | DEA(D/H)-box RNA helicase family protein | chr3:21640608-21643464 FORWARD LENGTH=612;AT3G58510.1 | Symbols: | DEA(D/H)
3	3	3	3	3	3	3	3	3		AT3G58500.1	AT3G58500.1	AT3G58500.1 | Symbols: PP2A-4 | protein phosphatase 2A-4 | chr3:21635503-21638911 REVERSE LENGTH=313
3	3	3	3	3	3	3	3	3		AT3G58140.1	AT3G58140.1	AT3G58140.1 | Symbols: | phenylalanyl-tRNA synthetase class IIc family protein | chr3:21529988-21532386 REVERSE LENGTH=429
3	3	3	3	3	3	3	3	3		AT3G57990.1	AT3G57990.1	AT3G57990.1 | Symbols: | unknown protein;Has 1497 Blast hits to 1323 proteins in 52 species: Archae - 0;Bacteria - 4;Metazoa - 23;Fungi - 34;Plants - 61;Viruses - 0;Other Eukaryotes - 1375 (source: NCBI BLink). | chr3:21470244-21471347 REVERSE LENG
3	3	3	3	3	3	3	3	3		AT3G57890.1;AT3G57890.2	AT3G57890.1;AT3G57890.2	AT3G57890.1 | Symbols: | Tubulin binding cofactor C domain-containing protein | chr3:21438271-21441695 FORWARD LENGTH=573;AT3G57890.2 | Symbols: | Tubulin binding cofactor C domain-containing protein | chr3:21438271-21441695 FORWARD LENGTH=609
3	3	3	2	3	3	3	3	1		AT3G57880.1	AT3G57880.1	AT3G57880.1 | Symbols: | Calcium-dependent lipid-binding (CaLB domain) plant phosphoribosyltransferase family protein | chr3:21431198-21433519 REVERSE LENGTH=773
3	3	3	3	3	3	3	3	3		AT3G57660.1	AT3G57660.1	AT3G57660.1 | Symbols: NRPA1 | nuclear RNA polymerase A1 | chr3:21353746-21362814 FORWARD LENGTH=1670
3	3	3	3	3	3	3	3	3		AT3G57650.1	AT3G57650.1	AT3G57650.1 | Symbols: LPAT2 | lysophosphatidyl acyltransferase 2 | chr3:21349751-21352839 FORWARD LENGTH=389
1	3	2	0	3	3	2	2	3		AT3G57560.1	AT3G57560.1	AT3G57560.1 | Symbols: NAGK | N-acetyl-l-glutamate kinase | chr3:21311164-21312207 REVERSE LENGTH=347
3	3	3	3	3	3	2	3	3		AT3G57520.1;AT3G57520.2;AT3G57520.3	AT3G57520.1;AT3G57520.2;AT3G57520.3	AT3G57520.1 | Symbols: AtSIP2, SIP2 | seed imbibition 2 | chr3:21288982-21292694 REVERSE LENGTH=773;AT3G57520.2 | Symbols: AtSIP2, SIP2 | seed imbibition 2 | chr3:21289299-21292694 REVERSE LENGTH=656;AT3G57520.3 | Symbols: AtSIP2, SIP2 | seed imbibition 2
3	3	3	3	3	3	3	3	3		AT3G57410.1	AT3G57410.1	AT3G57410.1 | Symbols: VLN3, ATVLN3 | villin 3 | chr3:21243615-21249809 REVERSE LENGTH=965
3	3	3	3	3	3	3	3	3		AT3G57300.1;AT3G57300.2	AT3G57300.1;AT3G57300.2	AT3G57300.1 | Symbols: INO80, ATINO80 | INO80 ortholog | chr3:21199612-21207635 FORWARD LENGTH=1507;AT3G57300.2 | Symbols: INO80 | INO80 ortholog | chr3:21199612-21207635 FORWARD LENGTH=1540
2	3	3	3	3	3	3	3	3		AT3G57290.1	AT3G57290.1	AT3G57290.1 | Symbols: EIF3E, TIF3E1, ATEIF3E-1, INT-6, ATINT6, INT6 | eukaryotic translation initiation factor 3E | chr3:21196786-21199073 REVERSE LENGTH=441
3	3	3	3	3	3	3	3	3		AT3G57180.1	AT3G57180.1	AT3G57180.1 | Symbols: BPG2 | P-loop containing nucleoside triphosphate hydrolases superfamily protein | chr3:21163663-21166006 REVERSE LENGTH=660
3	3	3	3	3	3	3	3	3		AT3G57150.1	AT3G57150.1	AT3G57150.1 | Symbols: NAP57, AtNAP57, CBF5, AtCBF5 | homologue of NAP57 | chr3:21154255-21155952 REVERSE LENGTH=565
3	3	3	3	3	3	3	3	3		AT3G57020.1;AT3G57020.2	AT3G57020.1;AT3G57020.2	AT3G57020.1 | Symbols: | Calcium-dependent phosphotriesterase superfamily protein | chr3:21098515-21100303 REVERSE LENGTH=370;AT3G57020.2 | Symbols: | Calcium-dependent phosphotriesterase superfamily protein | chr3:21098515-21100303 REVERSE LENGTH=356
3	3	3	3	3	3	3	3	3		AT3G57010.1	AT3G57010.1	AT3G57010.1 | Symbols: | Calcium-dependent phosphotriesterase superfamily protein | chr3:21095854-21097316 REVERSE LENGTH=376
3	3	3	3	3	3	3	3	3		AT3G56990.1	AT3G56990.1	AT3G56990.1 | Symbols: EDA7 | embryo sac development arrest 7 | chr3:21088358-21091976 REVERSE LENGTH=711
3	3	3	3	3	3	3	3	3		AT3G56940.1;AT3G56940.2	AT3G56940.1;AT3G56940.2	AT3G56940.1 | Symbols: CRD1, CHL27, ACSF | dicarboxylate diiron protein, putative (Crd1) | chr3:21076594-21078269 FORWARD LENGTH=409;AT3G56940.2 | Symbols: CRD1 | dicarboxylate diiron protein, putative (Crd1) | chr3:21076825-21078269 FORWARD LENGTH=332
3	3	3	3	3	3	3	3	3		AT3G56910.1	AT3G56910.1	AT3G56910.1 | Symbols: PSRP5 | plastid-specific 50S ribosomal protein 5 | chr3:21069558-21070257 REVERSE LENGTH=148
3	3	3	3	3	3	3	3	3		AT3G56860.5;AT3G56860.4;AT3G56860.3;AT3G56860.2;AT3G56860.1	AT3G56860.5;AT3G56860.4;AT3G56860.3;AT3G56860.2;AT3G56860.1;AT2G41060.2;AT2G41060.1	AT3G56860.5 | Symbols: UBA2A | UBP1-associated protein 2A | chr3:21050708-21052144 REVERSE LENGTH=478;AT3G56860.4 | Symbols: UBA2A | UBP1-associated protein 2A | chr3:21050708-21052144 REVERSE LENGTH=478;AT3G56860.3 | Symbols: UBA2A | UBP1-associated prote
3	3	3	3	3	3	3	3	3		AT3G56650.1	AT3G56650.1	AT3G56650.1 | Symbols: | Mog1/PsbP/DUF1795-like photosystem II reaction center PsbP family protein | chr3:20984807-20985913 FORWARD LENGTH=262
3	3	3	3	3	3	3	3	3		AT3G56460.1	AT3G56460.1	AT3G56460.1 | Symbols: | GroES-like zinc-binding alcohol dehydrogenase family protein | chr3:20933029-20934425 REVERSE LENGTH=348
3	3	3	3	3	3	3	3	3		AT3G56340.1	AT3G56340.1	AT3G56340.1 | Symbols: | Ribosomal protein S26e family protein | chr3:20892309-20893343 REVERSE LENGTH=130
3	3	3	3	3	3	3	3	3		AT3G56240.1	AT3G56240.1	AT3G56240.1 | Symbols: CCH | copper chaperone | chr3:20863460-20864402 REVERSE LENGTH=121
3	3	3	3	3	3	3	3	3		AT3G56150.2;AT3G56150.1	AT3G56150.2;AT3G56150.1;AT5G07740.1	AT3G56150.2 | Symbols: EIF3C | eukaryotic translation initiation factor 3C | chr3:20833790-20836820 REVERSE LENGTH=900;AT3G56150.1 | Symbols: EIF3C, ATEIF3C-1, EIF3C-1, ATTIF3C1, TIF3C1 | eukaryotic translation initiation factor 3C | chr3:20833790-20836820
3	3	3	3	3	3	3	3	3		AT3G56130.1;AT3G56130.4;AT3G56130.2;AT3G56130.3	AT3G56130.1;AT3G56130.4;AT3G56130.2;AT3G56130.3	AT3G56130.1 | Symbols: | biotin/lipoyl attachment domain-containing protein | chr3:20826852-20829007 FORWARD LENGTH=281;AT3G56130.4 | Symbols: | biotin/lipoyl attachment domain-containing protein | chr3:20826852-20829007 FORWARD LENGTH=274;AT3G56130.2 |
3	3	3	3	3	3	3	3	3		AT3G55800.1	AT3G55800.1	AT3G55800.1 | Symbols: SBPASE | sedoheptulose-bisphosphatase | chr3:20709640-20711421 FORWARD LENGTH=393
3	2	3	3	3	3	3	3	3		AT3G55770.5;AT3G55770.4;AT3G55770.3;AT3G55770.2;AT3G55770.1;AT3G55770.7;AT3G55770.6	AT3G55770.5;AT3G55770.4;AT3G55770.3;AT3G55770.2;AT3G55770.1;AT3G55770.7;AT3G55770.6	AT3G55770.5 | Symbols: | GATA type zinc finger transcription factor family protein | chr3:20703799-20705115 FORWARD LENGTH=199;AT3G55770.4 | Symbols: | GATA type zinc finger transcription factor family protein | chr3:20703799-20705115 FORWARD LENGTH=199;
3	3	3	3	3	3	3	3	3		AT3G55750.1	AT3G55750.1	AT3G55750.1 | Symbols: | Ribosomal protein L35Ae family protein | chr3:20698641-20699553 FORWARD LENGTH=111
3	3	3	3	3	3	3	3	3		AT3G55610.1;AT3G55610.2	AT3G55610.1;AT3G55610.2	AT3G55610.1 | Symbols: P5CS2 | delta 1-pyrroline-5-carboxylate synthase 2 | chr3:20624278-20628989 REVERSE LENGTH=726;AT3G55610.2 | Symbols: P5CS2 | delta 1-pyrroline-5-carboxylate synthase 2 | chr3:20625005-20628989 REVERSE LENGTH=622
2	3	3	2	2	3	2	3	3		AT3G55510.1	AT3G55510.1	AT3G55510.1 | Symbols: RBL | Noc2p family | chr3:20579232-20582124 FORWARD LENGTH=594
3	3	3	3	3	3	3	3	3		AT3G55480.1;AT3G55480.2	AT3G55480.1;AT3G55480.2	AT3G55480.1 | Symbols: PAT2 | protein affected traf&#64257;cking 2 | chr3:20566372-20570629 REVERSE LENGTH=987;AT3G55480.2 | Symbols: PAT2 | protein affected traf&#64257;cking 2 | chr3:20566372-20571171 REVERSE LENGTH=1115
3	3	3	3	3	3	3	3	3		AT3G55460.1	AT3G55460.1	AT3G55460.1 | Symbols: SCL30, At-SCL30 | SC35-like splicing factor 30 | chr3:20561024-20563502 FORWARD LENGTH=262
3	3	3	3	3	3	3	3	3		AT3G55440.1	AT3G55440.1	AT3G55440.1 | Symbols: ATCTIMC, TPI, CYTOTPI | triosephosphate isomerase | chr3:20553794-20556078 FORWARD LENGTH=254
3	3	3	3	3	3	3	3	3		AT3G55410.1	AT3G55410.1	AT3G55410.1 | Symbols: | 2-oxoglutarate dehydrogenase, E1 component | chr3:20541897-20545728 FORWARD LENGTH=1017
3	3	3	3	3	3	3	3	3		AT3G55360.1	AT3G55360.1	AT3G55360.1 | Symbols: CER10, ECR, ATTSC13, TSC13 | 3-oxo-5-alpha-steroid 4-dehydrogenase family protein | chr3:20521186-20522856 REVERSE LENGTH=310
3	3	3	3	3	3	3	3	3		AT3G55340.1	AT3G55340.1	AT3G55340.1 | Symbols: PHIP1 | phragmoplastin interacting protein 1 | chr3:20515672-20517832 FORWARD LENGTH=597
3	3	3	3	3	3	3	3	3		AT3G55330.1	AT3G55330.1	AT3G55330.1 | Symbols: PPL1 | PsbP-like protein 1 | chr3:20514031-20515275 REVERSE LENGTH=230
3	3	3	3	3	3	3	3	3		AT3G55280.3;AT3G55280.2;AT3G55280.1;AT2G39460.2;AT2G39460.1	AT3G55280.3;AT3G55280.2;AT3G55280.1;AT2G39460.2;AT2G39460.1	AT3G55280.3 | Symbols: RPL23AB | ribosomal protein L23AB | chr3:20500667-20501519 FORWARD LENGTH=148;AT3G55280.2 | Symbols: RPL23AB | ribosomal protein L23AB | chr3:20500667-20501519 FORWARD LENGTH=154;AT3G55280.1 | Symbols: RPL23AB | ribosomal protein L23
0	3	3	3	3	3	3	2	3		AT3G55160.1	AT3G55160.1	AT3G55160.1 | Symbols: | unknown protein;EXPRESSED IN: 11 plant structures;EXPRESSED DURING: 4 anthesis, F mature embryo stage, petal differentiation and expansion stage, E expanded cotyledon stage, D bilateral stage;CONTAINS InterPro DOMAIN/s: Protein
2	3	3	3	3	3	3	2	2		AT3G55070.1;AT3G55070.2	AT3G55070.1;AT3G55070.2	AT3G55070.1 | Symbols: | LisH/CRA/RING-U-box domains-containing protein | chr3:20408377-20410887 FORWARD LENGTH=418;AT3G55070.2 | Symbols: | LisH/CRA/RING-U-box domains-containing protein | chr3:20408377-20410297 FORWARD LENGTH=323
3	3	3	3	3	3	3	3	3		AT3G54890.4;AT3G54890.1	AT3G54890.4;AT3G54890.1;AT3G54890.3;AT3G54890.2	AT3G54890.4 | Symbols: LHCA1 | photosystem I light harvesting complex gene 1 | chr3:20339881-20340922 REVERSE LENGTH=213;AT3G54890.1 | Symbols: LHCA1 | photosystem I light harvesting complex gene 1 | chr3:20339706-20340922 REVERSE LENGTH=241
1	3	3	3	3	3	3	3	3		AT3G54760.2;AT3G54760.1	AT3G54760.2;AT3G54760.1	AT3G54760.2 | Symbols: | dentin sialophosphoprotein-related | chr3:20269659-20272037 REVERSE LENGTH=761;AT3G54760.1 | Symbols: | dentin sialophosphoprotein-related | chr3:20269659-20272037 REVERSE LENGTH=792
0	3	3	3	3	3	2	1	3		AT3G54610.1	AT3G54610.1	AT3G54610.1 | Symbols: HAT1, GCN5, HAG1, HAC3, HAG01, BGT | histone acetyltransferase of the GNAT family 1 | chr3:20213593-20217375 FORWARD LENGTH=568
3	3	3	3	3	3	3	3	3		AT3G54540.1	AT3G54540.1	AT3G54540.1 | Symbols: ATGCN4, GCN4 | general control non-repressible 4 | chr3:20190393-20192564 FORWARD LENGTH=723
3	3	3	3	3	3	3	3	3		AT3G54470.1	AT3G54470.1;AT1G12775.1	AT3G54470.1 | Symbols: | uridine 5-monophosphate synthase / UMP synthase (PYRE-F) (UMPS) | chr3:20168285-20170245 REVERSE LENGTH=476
3	3	3	3	3	3	3	3	3		AT3G54400.1	AT3G54400.1	AT3G54400.1 | Symbols: | Eukaryotic aspartyl protease family protein | chr3:20140291-20142599 REVERSE LENGTH=425
3	3	3	3	3	3	3	3	3		AT3G54230.1;AT3G54230.2	AT3G54230.1;AT3G54230.2	AT3G54230.1 | Symbols: SUA | suppressor of abi3-5 | chr3:20073872-20080142 FORWARD LENGTH=1007;AT3G54230.2 | Symbols: SUA | suppressor of abi3-5 | chr3:20073872-20080142 FORWARD LENGTH=1008
3	3	3	3	3	3	3	3	3		AT3G54210.1	AT3G54210.1	AT3G54210.1 | Symbols: | Ribosomal protein L17 family protein | chr3:20067672-20068385 REVERSE LENGTH=211
0	0	1	1	2	3	3	3	3		AT3G54170.1	AT3G54170.1	AT3G54170.1 | Symbols: ATFIP37, FIP37 | FKBP12 interacting protein 37 | chr3:20056848-20059396 FORWARD LENGTH=330
3	3	3	3	3	3	3	3	3		AT3G54110.1	AT3G54110.1	AT3G54110.1 | Symbols: ATPUMP1, UCP, PUMP1, ATUCP1, UCP1 | plant uncoupling mitochondrial protein 1 | chr3:20038890-20040996 FORWARD LENGTH=306
3	3	3	2	3	3	3	3	3		AT3G54090.1	AT3G54090.1	AT3G54090.1 | Symbols: FLN1 | fructokinase-like 1 | chr3:20028145-20029835 FORWARD LENGTH=471
3	3	3	3	3	3	3	3	3		AT3G54050.2;AT3G54050.1	AT3G54050.2;AT3G54050.1	AT3G54050.2 | Symbols: HCEF1 | high cyclic electron flow 1 | chr3:20016951-20018527 FORWARD LENGTH=417;AT3G54050.1 | Symbols: HCEF1 | high cyclic electron flow 1 | chr3:20016951-20018527 FORWARD LENGTH=417
3	3	3	3	3	3	3	3	3		AT3G53890.2;AT3G53890.1	AT3G53890.2;AT3G53890.1	AT3G53890.2 | Symbols: | Ribosomal protein S21e | chr3:19955582-19956049 REVERSE LENGTH=82;AT3G53890.1 | Symbols: | Ribosomal protein S21e | chr3:19955582-19956049 REVERSE LENGTH=82
3	3	3	3	3	3	3	3	3		AT3G53870.1	AT3G53870.1	AT3G53870.1 | Symbols: | Ribosomal protein S3 family protein | chr3:19951547-19952782 FORWARD LENGTH=249
3	3	3	3	3	3	3	3	3		AT3G53750.1;AT2G37620.2;AT2G37620.1	AT3G53750.1;AT2G37620.2;AT2G37620.1	AT3G53750.1 | Symbols: ACT3 | actin 3 | chr3:19915924-19917371 FORWARD LENGTH=377;AT2G37620.2 | Symbols: ACT1, AAc1 | actin 1 | chr2:15779761-15781241 FORWARD LENGTH=377;AT2G37620.1 | Symbols: ACT1, AAc1 | actin 1 | chr2:15779761-15781241 FORWARD LENGTH=37
3	3	3	3	3	3	3	3	3		AT3G53740.1;AT3G53740.4;AT3G53740.3;AT3G53740.2	AT3G53740.1;AT3G53740.4;AT3G53740.3;AT3G53740.2	AT3G53740.1 | Symbols: | Ribosomal protein L36e family protein | chr3:19913921-19914813 REVERSE LENGTH=103;AT3G53740.4 | Symbols: | Ribosomal protein L36e family protein | chr3:19913921-19914813 REVERSE LENGTH=112;AT3G53740.3 | Symbols: | Ribosomal prot
3	3	3	3	3	3	3	3	3		AT3G53700.1	AT3G53700.1	AT3G53700.1 | Symbols: MEE40 | Pentatricopeptide repeat (PPR) superfamily protein | chr3:19900303-19902567 FORWARD LENGTH=754
3	3	3	3	3	3	3	3	3		AT3G53520.2;AT3G53520.1;AT3G53520.4;AT3G53520.3	AT3G53520.2;AT3G53520.1;AT3G53520.4;AT3G53520.3	AT3G53520.2 | Symbols: UXS1, ATUXS1 | UDP-glucuronic acid decarboxylase 1 | chr3:19841635-19844057 FORWARD LENGTH=433;AT3G53520.1 | Symbols: UXS1, ATUXS1 | UDP-glucuronic acid decarboxylase 1 | chr3:19841635-19844057 FORWARD LENGTH=435;AT3G53520.4 | Symbol
3	3	3	3	3	3	3	3	3		AT3G53460.3;AT3G53460.2;AT3G53460.1;AT3G53460.4	AT3G53460.3;AT3G53460.2;AT3G53460.1;AT3G53460.4	AT3G53460.3 | Symbols: CP29 | chloroplast RNA-binding protein 29 | chr3:19819738-19821423 REVERSE LENGTH=342;AT3G53460.2 | Symbols: CP29 | chloroplast RNA-binding protein 29 | chr3:19819738-19821423 REVERSE LENGTH=342;AT3G53460.1 | Symbols: CP29 | chloropl
3	3	3	3	3	3	3	3	3		AT3G53430.1	AT3G53430.1	AT3G53430.1 | Symbols: | Ribosomal protein L11 family protein | chr3:19809895-19810395 REVERSE LENGTH=166
3	3	3	3	3	3	3	3	3		AT3G53420.2;AT3G53420.1	AT3G53420.2;AT3G53420.1	AT3G53420.2 | Symbols: PIP2A, PIP2, PIP2;1 | plasma membrane intrinsic protein 2A | chr3:19803906-19805454 REVERSE LENGTH=287;AT3G53420.1 | Symbols: PIP2A, PIP2, PIP2;1 | plasma membrane intrinsic protein 2A | chr3:19803906-19805454 REVERSE LENGTH=287
0	3	3	3	3	3	3	3	3		AT3G53260.1	AT3G53260.1	AT3G53260.1 | Symbols: PAL2, ATPAL2 | phenylalanine ammonia-lyase 2 | chr3:19744256-19746619 REVERSE LENGTH=717
3	3	3	3	3	3	3	3	3		AT3G53130.1	AT3G53130.1	AT3G53130.1 | Symbols: LUT1, CYP97C1 | Cytochrome P450 superfamily protein | chr3:19692812-19695278 FORWARD LENGTH=539
3	3	3	3	3	3	3	3	3		AT3G53110.1	AT3G53110.1	AT3G53110.1 | Symbols: LOS4 | P-loop containing nucleoside triphosphate hydrolases superfamily protein | chr3:19687968-19690423 FORWARD LENGTH=496
3	3	3	3	3	3	3	3	3		AT3G53020.1;AT2G36620.1	AT3G53020.1;AT2G36620.1	AT3G53020.1 | Symbols: STV1, RPL24B, RPL24 | Ribosomal protein L24e family protein | chr3:19660749-19661912 REVERSE LENGTH=163;AT2G36620.1 | Symbols: RPL24A | ribosomal protein L24 | chr2:15350548-15351819 REVERSE LENGTH=164
3	3	3	3	3	3	3	3	3		AT3G52990.1;AT3G52990.2	AT3G52990.1;AT3G52990.2	AT3G52990.1 | Symbols: | Pyruvate kinase family protein | chr3:19649046-19652237 FORWARD LENGTH=527;AT3G52990.2 | Symbols: | Pyruvate kinase family protein | chr3:19649336-19652237 FORWARD LENGTH=474
3	3	3	3	3	3	3	3	3		AT3G52960.1	AT3G52960.1	AT3G52960.1 | Symbols: | Thioredoxin superfamily protein | chr3:19639699-19640403 FORWARD LENGTH=234
2	2	3	1	3	3	2	3	3		AT3G52950.2;AT3G52950.1	AT3G52950.2;AT3G52950.1	AT3G52950.2 | Symbols: | CBS / octicosapeptide/Phox/Bemp1 (PB1) domains-containing protein | chr3:19634866-19636536 FORWARD LENGTH=556;AT3G52950.1 | Symbols: | CBS / octicosapeptide/Phox/Bemp1 (PB1) domains-containing protein | chr3:19634866-19636536 FOR
3	3	3	3	3	3	3	3	3		AT3G52930.1	AT3G52930.1;AT5G03690.2;AT5G03690.1	AT3G52930.1 | Symbols: | Aldolase superfamily protein | chr3:19627383-19628874 REVERSE LENGTH=358
3	3	3	3	3	3	3	3	3		AT3G52880.1;AT3G52880.2	AT3G52880.1;AT3G52880.2	AT3G52880.1 | Symbols: ATMDAR1, MDAR1 | monodehydroascorbate reductase 1 | chr3:19601477-19604366 REVERSE LENGTH=434;AT3G52880.2 | Symbols: ATMDAR1, MDAR1 | monodehydroascorbate reductase 1 | chr3:19601477-19604366 REVERSE LENGTH=466
3	3	3	3	3	3	3	3	2		AT3G52870.1	AT3G52870.1	AT3G52870.1 | Symbols: | IQ calmodulin-binding motif family protein | chr3:19593365-19595686 REVERSE LENGTH=456
3	3	3	3	3	3	3	3	3		AT3G52750.1	AT3G52750.1	AT3G52750.1 | Symbols: FTSZ2-2 | Tubulin/FtsZ family protein | chr3:19549841-19552435 REVERSE LENGTH=473
3	3	3	3	3	3	3	3	3		AT3G52730.1	AT3G52730.1	AT3G52730.1 | Symbols: | ubiquinol-cytochrome C reductase UQCRX/QCR9-like family protein | chr3:19543146-19544167 REVERSE LENGTH=72
1	3	3	3	3	3	3	3	3		AT3G52660.2;AT3G52660.1	AT3G52660.2;AT3G52660.1;AT5G28390.1	AT3G52660.2 | Symbols: | RNA-binding (RRM/RBD/RNP motifs) family protein | chr3:19522598-19524735 FORWARD LENGTH=471;AT3G52660.1 | Symbols: | RNA-binding (RRM/RBD/RNP motifs) family protein | chr3:19522598-19524735 FORWARD LENGTH=471
3	3	3	3	3	3	3	3	3		AT3G52580.1	AT3G52580.1	AT3G52580.1 | Symbols: | Ribosomal protein S11 family protein | chr3:19503324-19504701 FORWARD LENGTH=150
3	3	3	3	3	3	3	3	3		AT3G52560.2;AT3G52560.3	AT3G52560.2;AT3G52560.3	AT3G52560.2 | Symbols: UEV1D-4 | ubiquitin E2 variant 1D-4 | chr3:19494678-19495954 REVERSE LENGTH=147;AT3G52560.3 | Symbols: UEV1D-4 | ubiquitin E2 variant 1D-4 | chr3:19494678-19495331 REVERSE LENGTH=110
3	3	3	3	3	3	3	3	3		AT3G52340.3;AT3G52340.2;AT3G52340.1	AT3G52340.3;AT3G52340.2;AT3G52340.1	AT3G52340.3 | Symbols: SPP2 | sucrose-6F-phosphate phosphohydrolase 2 | chr3:19407412-19409182 FORWARD LENGTH=423;AT3G52340.2 | Symbols: SPP2 | sucrose-6F-phosphate phosphohydrolase 2 | chr3:19407412-19409182 FORWARD LENGTH=423;AT3G52340.1 | Symbols: SPP2,
3	3	3	3	1	3	3	3	3		AT3G52200.1;AT3G52200.2	AT3G52200.1;AT3G52200.2	AT3G52200.1 | Symbols: LTA3 | Dihydrolipoamide acetyltransferase, long form protein | chr3:19360317-19366091 FORWARD LENGTH=637;AT3G52200.2 | Symbols: LTA3 | Dihydrolipoamide acetyltransferase, long form protein | chr3:19360317-19366091 FORWARD LENGTH=713
3	3	3	2	3	3	3	3	3		AT3G52180.1	AT3G52180.1;AT3G52180.2	AT3G52180.1 | Symbols: ATPTPKIS1, DSP4, SEX4, ATSEX4 | dual specificity protein phosphatase (DsPTP1) family protein | chr3:19349884-19353459 REVERSE LENGTH=379
3	3	3	3	3	3	3	3	3		AT3G52140.1;AT3G52140.2;AT3G52140.4;AT3G52140.3	AT3G52140.1;AT3G52140.2;AT3G52140.4;AT3G52140.3	AT3G52140.1 | Symbols: | tetratricopeptide repeat (TPR)-containing protein | chr3:19333232-19341295 FORWARD LENGTH=1403;AT3G52140.2 | Symbols: | tetratricopeptide repeat (TPR)-containing protein | chr3:19333232-19341295 FORWARD LENGTH=1407;AT3G52140.4 |
0	1	0	0	3	3	0	2	3		AT3G52120.1;AT3G52120.2	AT3G52120.1;AT3G52120.2	AT3G52120.1 | Symbols: | SWAP (Suppressor-of-White-APricot)/surp domain-containing protein / D111/G-patch domain-containing protein | chr3:19329243-19331738 FORWARD LENGTH=443;AT3G52120.2 | Symbols: | SWAP (Suppressor-of-White-APricot)/surp domain-contai
3	3	3	3	3	3	3	3	3		AT3G51840.1	AT3G51840.1	AT3G51840.1 | Symbols: ACX4, ATSCX, ATG6 | acyl-CoA oxidase 4 | chr3:19225653-19229008 REVERSE LENGTH=436
3	3	3	3	3	3	3	3	3		AT3G51800.3;AT3G51800.1;AT3G51800.2	AT3G51800.3;AT3G51800.1;AT3G51800.2	AT3G51800.3 | Symbols: ATG2 | metallopeptidase M24 family protein | chr3:19211261-19213568 REVERSE LENGTH=385;AT3G51800.1 | Symbols: ATG2, EBP1, ATEBP1 | metallopeptidase M24 family protein | chr3:19211261-19213568 REVERSE LENGTH=392;AT3G51800.2 | Symbols:
3	3	3	3	3	3	3	3	3		AT3G51550.1	AT3G51550.1;AT5G24010.1;AT5G61350.1;AT1G30570.1	AT3G51550.1 | Symbols: FER | Malectin/receptor-like protein kinase family protein | chr3:19117877-19120564 REVERSE LENGTH=895
3	3	3	3	3	3	3	3	3		AT3G51260.2;AT3G51260.1;AT5G66140.1	AT3G51260.2;AT3G51260.1;AT5G66140.1	AT3G51260.2 | Symbols: PAD1 | 20S proteasome alpha subunit PAD1 | chr3:19031086-19032746 FORWARD LENGTH=243;AT3G51260.1 | Symbols: PAD1 | 20S proteasome alpha subunit PAD1 | chr3:19031086-19032746 FORWARD LENGTH=250;AT5G66140.1 | Symbols: PAD2 | proteaso
3	3	3	3	3	3	3	3	3		AT3G51160.1	AT3G51160.1	AT3G51160.1 | Symbols: MUR1, MUR_1, GMD2 | NAD(P)-binding Rossmann-fold superfamily protein | chr3:19007232-19008353 REVERSE LENGTH=373
3	3	3	3	3	3	3	3	3		AT3G51010.1	AT3G51010.1	AT3G51010.1 | Symbols: | unknown protein;FUNCTIONS IN: molecular_function unknown;INVOLVED IN: biological_process unknown;LOCATED IN: mitochondrion, plastid;EXPRESSED IN: 22 plant structures;EXPRESSED DURING: 13 growth stages;Has 24 Blast hits to 24
3	3	3	3	3	3	3	3	3		AT3G50670.1;AT3G50670.2	AT3G50670.1;AT3G50670.2	AT3G50670.1 | Symbols: U1-70K, U1SNRNP | U1 small nuclear ribonucleoprotein-70K | chr3:18826476-18829492 REVERSE LENGTH=427;AT3G50670.2 | Symbols: U1-70K, U1SNRNP | U1 small nuclear ribonucleoprotein-70K | chr3:18828232-18829492 REVERSE LENGTH=204
3	3	3	3	3	3	3	3	3		AT3G50590.1	AT3G50590.1	AT3G50590.1 | Symbols: | Transducin/WD40 repeat-like superfamily protein | chr3:18771292-18779220 FORWARD LENGTH=1614
3	3	3	3	3	3	3	3	3		AT3G50370.1	AT3G50370.1	AT3G50370.1 | Symbols: | unknown protein;FUNCTIONS IN: molecular_function unknown;INVOLVED IN: biological_process unknown;LOCATED IN: cellular_component unknown;EXPRESSED IN: 26 plant structures;EXPRESSED DURING: 15 growth stages;Has 27734 Blast hit
3	3	3	3	3	3	3	3	3		AT3G50000.1	AT3G50000.1	AT3G50000.1 | Symbols: CKA2, ATCKA2 | casein kinase II, alpha chain 2 | chr3:18534487-18536743 FORWARD LENGTH=403
3	3	3	3	3	3	3	3	3		AT3G49910.1	AT3G49910.1	AT3G49910.1 | Symbols: | Translation protein SH3-like family protein | chr3:18504311-18504751 FORWARD LENGTH=146
3	3	3	3	3	3	3	3	3		AT3G49720.2;AT3G49720.1	AT3G49720.2;AT3G49720.1;AT5G65810.1	AT3G49720.2 | Symbols: | unknown protein;FUNCTIONS IN: molecular_function unknown;INVOLVED IN: biological_process unknown;LOCATED IN: chloroplast thylakoid membrane, Golgi apparatus, plasma membrane, membrane;EXPRESSED IN: 25 plant structures;EXPRESS
3	3	3	3	3	3	3	3	3		AT3G49680.2;AT3G49680.1	AT3G49680.2;AT3G49680.1;AT5G65780.1	AT3G49680.2 | Symbols: ATBCAT-3, BCAT3 | branched-chain aminotransferase 3 | chr3:18422768-18425473 FORWARD LENGTH=411;AT3G49680.1 | Symbols: ATBCAT-3, BCAT3 | branched-chain aminotransferase 3 | chr3:18422768-18425473 FORWARD LENGTH=413
3	3	3	3	3	3	3	3	3		AT3G49601.1	AT3G49601.1	AT3G49601.1 | Symbols: | FUNCTIONS IN: molecular_function unknown;INVOLVED IN: biological_process unknown;LOCATED IN: cellular_component unknown;CONTAINS InterPro DOMAIN/s: mRNA splicing factor, Cwf21 (InterPro:IPR013170);Has 30201 Blast hits to 17322
3	3	3	3	3	3	3	3	3		AT3G49430.2;AT3G49430.3;AT3G49430.1	AT3G49430.2;AT3G49430.3;AT3G49430.1	AT3G49430.2 | Symbols: SRp34a, SR34a, At-SR34a | SER/ARG-rich protein 34A | chr3:18332668-18334617 FORWARD LENGTH=297;AT3G49430.3 | Symbols: SRp34a, SR34a, At-SR34a | SER/ARG-rich protein 34A | chr3:18332668-18334829 FORWARD LENGTH=300;AT3G49430.1 | Symbol
3	3	3	3	3	3	3	3	3		AT3G49240.1	AT3G49240.1	AT3G49240.1 | Symbols: emb1796 | Pentatricopeptide repeat (PPR) superfamily protein | chr3:18256086-18257975 FORWARD LENGTH=629
3	3	3	3	3	3	3	3	3		AT3G49140.1	AT3G49140.1;AT5G24060.1;AT5G24060.2	AT3G49140.1 | Symbols: | Pentatricopeptide repeat (PPR) superfamily protein | chr3:18212187-18215557 REVERSE LENGTH=499
3	3	3	3	3	3	3	3	3		AT3G49010.3;AT3G49010.2;AT3G49010.1;AT3G49010.4;AT3G49010.5	AT3G49010.3;AT3G49010.2;AT3G49010.1;AT3G49010.4;AT3G49010.5	AT3G49010.3 | Symbols: ATBBC1, BBC1, RSU2 | breast basic conserved 1 | chr3:18166971-18168047 REVERSE LENGTH=206;AT3G49010.2 | Symbols: ATBBC1, BBC1, RSU2 | breast basic conserved 1 | chr3:18166971-18168047 REVERSE LENGTH=206;AT3G49010.1 | Symbols: ATBBC1,
3	3	3	3	3	3	3	3	3		AT3G48990.1	AT3G48990.1	AT3G48990.1 | Symbols: | AMP-dependent synthetase and ligase family protein | chr3:18159031-18161294 REVERSE LENGTH=514
3	3	3	3	3	3	3	3	3		AT3G48930.1	AT3G48930.1	AT3G48930.1 | Symbols: EMB1080 | Nucleic acid-binding, OB-fold-like protein | chr3:18141017-18142189 REVERSE LENGTH=160
3	3	3	3	3	3	3	3	3		AT3G48870.2;AT3G48870.1	AT3G48870.2;AT3G48870.1;AT3G45450.1	AT3G48870.2 | Symbols: HSP93-III | Clp ATPase | chr3:18122363-18125915 REVERSE LENGTH=921;AT3G48870.1 | Symbols: ATCLPC, ATHSP93-III, HSP93-III | Clp ATPase | chr3:18122363-18126008 REVERSE LENGTH=952
3	3	3	3	3	3	3	3	3		AT3G48750.1	AT3G48750.1	AT3G48750.1 | Symbols: CDKA;1, CDC2AAT, CDK2, CDC2, CDC2A, CDKA1 | cell division control 2 | chr3:18072238-18074296 FORWARD LENGTH=294
3	3	3	3	3	3	3	3	3		AT3G48730.1	AT3G48730.1	AT3G48730.1 | Symbols: GSA2 | glutamate-1-semialdehyde 2,1-aminomutase 2 | chr3:18049697-18051550 FORWARD LENGTH=472
3	3	3	3	3	3	3	3	3		AT3G48690.1	AT3G48690.1;AT3G48700.1	AT3G48690.1 | Symbols: ATCXE12, CXE12 | alpha/beta-Hydrolases superfamily protein | chr3:18037186-18038160 REVERSE LENGTH=324
3	3	3	3	3	3	3	3	3		AT3G48560.1	AT3G48560.1	AT3G48560.1 | Symbols: CSR1, ALS, AHAS, TZP5, IMR1 | chlorsulfuron/imidazolinone resistant 1 | chr3:18001530-18003542 REVERSE LENGTH=670
3	3	3	3	3	3	3	3	3		AT3G48500.1;AT3G48500.2	AT3G48500.1;AT3G48500.2	AT3G48500.1 | Symbols: PDE312, PTAC10 | Nucleic acid-binding, OB-fold-like protein | chr3:17962209-17965408 FORWARD LENGTH=668;AT3G48500.2 | Symbols: PDE312, PTAC10 | Nucleic acid-binding, OB-fold-like protein | chr3:17962209-17965408 FORWARD LENGTH=697
3	3	3	3	3	3	3	3	3		AT3G48430.1	AT3G48430.1	AT3G48430.1 | Symbols: REF6 | relative of early flowering 6 | chr3:17935609-17940456 FORWARD LENGTH=1360
3	3	3	3	3	3	3	3	3		AT3G48110.1	AT3G48110.1	AT3G48110.1 | Symbols: EDD1, EDD | glycine-tRNA ligases | chr3:17763111-17770964 FORWARD LENGTH=1067
3	3	3	3	3	3	2	3	2		AT3G48090.1;AT3G48090.2	AT3G48090.1;AT3G48090.2	AT3G48090.1 | Symbols: EDS1, ATEDS1 | alpha/beta-Hydrolases superfamily protein | chr3:17755553-17757692 REVERSE LENGTH=623;AT3G48090.2 | Symbols: EDS1, ATEDS1 | alpha/beta-Hydrolases superfamily protein | chr3:17755553-17757292 REVERSE LENGTH=515
0	0	0	1	3	3	2	3	3		AT3G48050.2;AT3G48050.1;AT3G48060.1	AT3G48050.2;AT3G48050.1;AT3G48060.1	AT3G48050.2 | Symbols: | BAH domain;TFIIS helical bundle-like domain | chr3:17734270-17739412 REVERSE LENGTH=1613;AT3G48050.1 | Symbols: | BAH domain;TFIIS helical bundle-like domain | chr3:17734270-17739412 REVERSE LENGTH=1613;AT3G48060.1 | Symbols:
3	3	3	3	3	3	3	3	3		AT3G48000.1	AT3G48000.1;AT1G23800.1	AT3G48000.1 | Symbols: ALDH2B4, ALDH2, ALDH2A | aldehyde dehydrogenase 2B4 | chr3:17717082-17719843 REVERSE LENGTH=538
3	3	3	3	3	3	3	3	3		AT3G47650.1	AT3G47650.1	AT3G47650.1 | Symbols: | DnaJ/Hsp40 cysteine-rich domain superfamily protein | chr3:17569576-17570262 FORWARD LENGTH=136
3	3	3	3	3	3	3	3	3		AT3G47520.1	AT3G47520.1	AT3G47520.1 | Symbols: MDH | malate dehydrogenase | chr3:17513657-17514868 FORWARD LENGTH=403
3	3	3	3	3	3	3	3	3		AT3G47470.1	AT3G47470.1	AT3G47470.1 | Symbols: LHCA4, CAB4 | light-harvesting chlorophyll-protein complex I subunit A4 | chr3:17493622-17494773 REVERSE LENGTH=251
1	2	3	3	3	3	2	3	3		AT3G47390.2;AT3G47390.1	AT3G47390.2;AT3G47390.1	AT3G47390.2 | Symbols: PHS1 | cytidine/deoxycytidylate deaminase family protein | chr3:17462094-17464655 FORWARD LENGTH=596;AT3G47390.1 | Symbols: PHS1 | cytidine/deoxycytidylate deaminase family protein | chr3:17462094-17464655 FORWARD LENGTH=599
3	3	3	3	3	3	3	3	3		AT3G47370.3;AT3G47370.2;AT3G47370.1	AT3G47370.3;AT3G47370.2;AT3G47370.1	AT3G47370.3 | Symbols: | Ribosomal protein S10p/S20e family protein | chr3:17453671-17454437 REVERSE LENGTH=122;AT3G47370.2 | Symbols: | Ribosomal protein S10p/S20e family protein | chr3:17453671-17454437 REVERSE LENGTH=122;AT3G47370.1 | Symbols: | Ribo
3	3	3	3	3	3	3	3	3		AT3G47340.1;AT3G47340.2;AT3G47340.3	AT3G47340.1;AT3G47340.2;AT3G47340.3	AT3G47340.1 | Symbols: ASN1, DIN6, AT-ASN1 | glutamine-dependent asparagine synthase 1 | chr3:17438136-17441043 REVERSE LENGTH=584;AT3G47340.2 | Symbols: ASN1, DIN6, AT-ASN1 | glutamine-dependent asparagine synthase 1 | chr3:17438445-17441043 REVERSE LENGT
3	3	3	2	2	3	3	3	3		AT3G47120.1	AT3G47120.1	AT3G47120.1 | Symbols: | RNA recognition motif (RRM)-containing protein | chr3:17351334-17352769 REVERSE LENGTH=352
3	3	3	3	3	3	3	3	3		AT3G47070.1	AT3G47070.1	AT3G47070.1 | Symbols: | LOCATED IN: thylakoid, chloroplast thylakoid membrane, chloroplast, chloroplast envelope;EXPRESSED IN: 22 plant structures;EXPRESSED DURING: 13 growth stages;CONTAINS InterPro DOMAIN/s: Thylakoid soluble phosphoprotein TSP9 (In
3	3	3	3	3	3	3	3	3		AT3G46970.1	AT3G46970.1	AT3G46970.1 | Symbols: ATPHS2, PHS2 | alpha-glucan phosphorylase 2 | chr3:17301625-17306111 REVERSE LENGTH=841
3	3	3	3	3	3	3	3	3		AT3G46780.1	AT3G46780.1	AT3G46780.1 | Symbols: PTAC16 | plastid transcriptionally active 16 | chr3:17228766-17231021 FORWARD LENGTH=510
3	3	3	3	3	3	3	3	3		AT3G46740.1	AT3G46740.1	AT3G46740.1 | Symbols: TOC75-III, MAR1 | translocon at the outer envelope membrane of chloroplasts 75-III | chr3:17216104-17219296 REVERSE LENGTH=818
2	3	3	3	3	3	3	3	2		AT3G46630.1	AT3G46630.1	AT3G46630.1 | Symbols: | Protein of unknown function (DUF3223) | chr3:17181138-17182346 REVERSE LENGTH=207
3	3	3	3	3	3	3	3	3		AT3G46290.1	AT3G46290.1;AT5G59700.1;AT2G21480.1;AT4G39110.1;AT5G15730.1;AT5G15730.2;AT2G39360.1;AT2G23200.1;AT5G49770.1;AT1G79620.1	AT3G46290.1 | Symbols: HERK1 | hercules receptor kinase 1 | chr3:17013009-17015501 FORWARD LENGTH=830
3	3	3	3	3	3	3	3	3		AT3G46100.1;AT5G03406.1	AT3G46100.1;AT5G03406.1	AT3G46100.1 | Symbols: ATHRS1, HRS1 | Histidyl-tRNA synthetase 1 | chr3:16928444-16930984 REVERSE LENGTH=486;AT5G03406.1 | Symbols: | Class II aaRS and biotin synthetases superfamily protein | chr5:839966-841444 FORWARD LENGTH=263
3	3	3	3	3	3	3	3	3		AT3G46040.1	AT3G46040.1	AT3G46040.1 | Symbols: RPS15AD | ribosomal protein S15A D | chr3:16914891-16915529 FORWARD LENGTH=130
2	2	3	1	3	3	2	3	3		AT3G45850.2;AT3G45850.1	AT3G45850.2;AT3G45850.1	AT3G45850.2 | Symbols: | P-loop containing nucleoside triphosphate hydrolases superfamily protein | chr3:16855814-16860950 REVERSE LENGTH=1058;AT3G45850.1 | Symbols: | P-loop containing nucleoside triphosphate hydrolases superfamily protein | chr3:168558
3	2	3	3	3	3	3	3	3		AT3G45830.1	AT3G45830.1	AT3G45830.1 | Symbols: | unknown protein;FUNCTIONS IN: molecular_function unknown;INVOLVED IN: biological_process unknown;LOCATED IN: cellular_component unknown;EXPRESSED IN: 24 plant structures;EXPRESSED DURING: 15 growth stages;BEST Arabidopsis th
3	3	3	3	3	3	3	3	3		AT3G45780.2;AT3G45780.1	AT3G45780.2;AT3G45780.1	AT3G45780.2 | Symbols: PHOT1, NPH1, JK224, RPT1 | phototropin 1 | chr3:16818557-16823960 FORWARD LENGTH=996;AT3G45780.1 | Symbols: PHOT1, NPH1, JK224, RPT1 | phototropin 1 | chr3:16818557-16823960 FORWARD LENGTH=996
3	3	3	3	3	3	3	3	3		AT3G45190.1	AT3G45190.1	AT3G45190.1 | Symbols: | SIT4 phosphatase-associated family protein | chr3:16541994-16548161 REVERSE LENGTH=789
3	3	3	3	3	3	3	3	3		AT3G45140.1	AT3G45140.1	AT3G45140.1 | Symbols: LOX2, ATLOX2 | lipoxygenase 2 | chr3:16525437-16529233 FORWARD LENGTH=896
3	2	3	3	3	2	3	2	2		AT3G45010.1	AT3G45010.1	AT3G45010.1 | Symbols: scpl48 | serine carboxypeptidase-like 48 | chr3:16466328-16468845 FORWARD LENGTH=510
3	3	3	3	3	3	3	3	3		AT3G44890.1	AT3G44890.1	AT3G44890.1 | Symbols: RPL9 | ribosomal protein L9 | chr3:16386505-16387963 FORWARD LENGTH=197
3	3	3	3	3	3	3	3	3		AT3G44750.2;AT3G44750.1	AT3G44750.2;AT3G44750.1	AT3G44750.2 | Symbols: HDA3 | histone deacetylase 3 | chr3:16298045-16299585 FORWARD LENGTH=242;AT3G44750.1 | Symbols: HD2A, ATHD2A, HDA3, HDT1 | histone deacetylase 3 | chr3:16298045-16299585 FORWARD LENGTH=245
1	3	3	2	3	3	3	3	3		AT3G44530.2;AT3G44530.1	AT3G44530.2;AT3G44530.1	AT3G44530.2 | Symbols: HIRA | homolog of histone chaperone HIRA | chr3:16116026-16121247 FORWARD LENGTH=1040;AT3G44530.1 | Symbols: HIRA | homolog of histone chaperone HIRA | chr3:16116026-16121247 FORWARD LENGTH=1058
3	3	3	3	3	3	3	3	3		AT3G44340.1;AT3G44340.2	AT3G44340.1;AT3G44340.2;AT4G32640.2;AT4G32640.1	AT3G44340.1 | Symbols: CEF | clone eighty-four | chr3:16011923-16019873 REVERSE LENGTH=1096;AT3G44340.2 | Symbols: CEF | clone eighty-four | chr3:16012084-16019873 REVERSE LENGTH=1069
3	3	3	3	3	3	3	3	3		AT3G44320.1	AT3G44320.1	AT3G44320.1 | Symbols: NIT3, AtNIT3 | nitrilase 3 | chr3:15993419-15995493 FORWARD LENGTH=346
3	3	3	3	3	3	3	3	3		AT3G44310.3;AT3G44310.1;AT3G44310.2	AT3G44310.3;AT3G44310.1;AT3G44310.2	AT3G44310.3 | Symbols: NIT1, ATNIT1, NITI | nitrilase 1 | chr3:15986901-15988841 FORWARD LENGTH=346;AT3G44310.1 | Symbols: NIT1, ATNIT1, NITI | nitrilase 1 | chr3:15986901-15988841 FORWARD LENGTH=346;AT3G44310.2 | Symbols: NIT1, ATNIT1, NITI | nitrilase 1
3	3	3	3	3	3	3	3	3		AT3G44110.1;AT3G44110.2	AT3G44110.1;AT3G44110.2	AT3G44110.1 | Symbols: ATJ3, ATJ | DNAJ homologue 3 | chr3:15869115-15871059 REVERSE LENGTH=420;AT3G44110.2 | Symbols: ATJ3, ATJ | DNAJ homologue 3 | chr3:15869179-15871059 REVERSE LENGTH=343
3	2	1	3	3	2	3	3	2		AT3G44100.1	AT3G44100.1	AT3G44100.1 | Symbols: | MD-2-related lipid recognition domain-containing protein | chr3:15866162-15867273 REVERSE LENGTH=152
3	3	3	3	3	3	3	3	3		AT3G43590.1	AT3G43590.1	AT3G43590.1 | Symbols: | zinc knuckle (CCHC-type) family protein | chr3:15509753-15512255 FORWARD LENGTH=551
3	3	3	3	3	3	3	3	3		AT3G43540.2;AT3G43540.1	AT3G43540.2;AT3G43540.1	AT3G43540.2 | Symbols: | Protein of unknown function (DUF1350) | chr3:15431063-15433035 FORWARD LENGTH=301;AT3G43540.1 | Symbols: | Protein of unknown function (DUF1350) | chr3:15430770-15433035 FORWARD LENGTH=373
3	3	3	3	3	3	3	3	3		AT3G43300.2;AT3G43300.1	AT3G43300.2;AT3G43300.1	AT3G43300.2 | Symbols: ATMIN7 | HOPM interactor 7 | chr3:15234235-15245034 REVERSE LENGTH=1727;AT3G43300.1 | Symbols: ATMIN7, BEN1 | HOPM interactor 7 | chr3:15234235-15245034 REVERSE LENGTH=1758
3	3	3	3	3	3	3	3	3		AT3G43240.1	AT3G43240.1	AT3G43240.1 | Symbols: | ARID/BRIGHT DNA-binding domain-containing protein | chr3:15210032-15214440 REVERSE LENGTH=747
3	3	3	3	3	3	3	3	3		AT3G42170.1	AT3G42170.1	AT3G42170.1 | Symbols: | BED zinc finger;hAT family dimerisation domain | chr3:14321838-14323928 FORWARD LENGTH=696
3	3	3	3	3	3	3	3	3		AT3G42050.1	AT3G42050.1	AT3G42050.1 | Symbols: | vacuolar ATP synthase subunit H family protein | chr3:14228846-14232228 REVERSE LENGTH=441
3	3	3	3	3	3	3	3	3		AT3G30775.1	AT3G30775.1	AT3G30775.1 | Symbols: ERD5, PRODH, AT-POX, ATPOX, ATPDH, PRO1 | Methylenetetrahydrofolate reductase family protein | chr3:12448880-12451126 REVERSE LENGTH=499
3	3	3	3	3	3	3	3	3		AT3G29360.2;AT3G29360.1	AT3G29360.2;AT3G29360.1	AT3G29360.2 | Symbols: | UDP-glucose 6-dehydrogenase family protein | chr3:11267375-11268817 REVERSE LENGTH=480;AT3G29360.1 | Symbols: | UDP-glucose 6-dehydrogenase family protein | chr3:11267375-11268817 REVERSE LENGTH=480
3	3	3	3	3	3	3	3	3		AT3G29320.1	AT3G29320.1	AT3G29320.1 | Symbols: | Glycosyl transferase, family 35 | chr3:11252871-11257587 FORWARD LENGTH=962
3	3	3	3	3	3	3	3	3		AT3G29310.1	AT3G29310.1	AT3G29310.1 | Symbols: | calmodulin-binding protein-related | chr3:11249712-11251452 FORWARD LENGTH=551
3	3	3	3	3	3	3	3	3		AT3G29160.3;AT3G29160.2;AT3G29160.1	AT3G29160.3;AT3G29160.2;AT3G29160.1;AT5G39440.1	AT3G29160.3 | Symbols: AKIN11, KIN11 | SNF1 kinase homolog 11 | chr3:11129768-11131510 REVERSE LENGTH=359;AT3G29160.2 | Symbols: AKIN11, KIN11 | SNF1 kinase homolog 11 | chr3:11128893-11131510 REVERSE LENGTH=512;AT3G29160.1 | Symbols: AKIN11, SNRK1.2, KIN1
3	3	2	3	3	3	3	3	3		AT3G29090.1	AT3G29090.1	AT3G29090.1 | Symbols: PME31, ATPME31 | pectin methylesterase 31 | chr3:11073804-11075335 FORWARD LENGTH=317
0	0	1	2	2	3	3	3	3		AT3G28920.1	AT3G28920.1	AT3G28920.1 | Symbols: AtHB34, HB34, ZHD9 | homeobox protein 34 | chr3:10940598-10941536 REVERSE LENGTH=312
3	3	3	3	3	3	3	3	3		AT3G28860.1	AT3G28860.1;AT2G36910.1;AT3G28415.1;AT3G28390.1;AT3G28360.1;AT3G28380.1;AT3G28345.1;AT1G27940.1;AT1G28010.1	AT3G28860.1 | Symbols: ATMDR1, ATMDR11, PGP19, MDR11, MDR1, ATPGP19, ABCB19, ATABCB19 | ATP binding cassette subfamily B19 | chr3:10870287-10877286 REVERSE LENGTH=1252
2	3	3	2	3	3	3	3	3		AT3G28730.1	AT3G28730.1	AT3G28730.1 | Symbols: ATHMG, SSRP1, NFD, HMG | high mobility group | chr3:10784954-10788498 FORWARD LENGTH=646
3	3	3	3	3	3	3	3	3		AT3G28710.1	AT3G28710.1	AT3G28710.1 | Symbols: | ATPase, V0/A0 complex, subunit C/D | chr3:10773144-10775594 REVERSE LENGTH=351
1	2	3	3	3	3	3	3	3		AT3G28200.1	AT3G28200.1	AT3G28200.1 | Symbols: | Peroxidase superfamily protein | chr3:10518082-10519032 FORWARD LENGTH=316
3	3	3	3	3	3	3	3	3		AT3G27925.1	AT3G27925.1	AT3G27925.1 | Symbols: DEGP1, Deg1 | DegP protease 1 | chr3:10366659-10368864 REVERSE LENGTH=439
3	3	3	3	3	3	3	3	3		AT3G27740.1;AT3G27740.2	AT3G27740.1;AT3G27740.2	AT3G27740.1 | Symbols: CARA | carbamoyl phosphate synthetase A | chr3:10281470-10283792 REVERSE LENGTH=430;AT3G27740.2 | Symbols: CARA | carbamoyl phosphate synthetase A | chr3:10281470-10283792 REVERSE LENGTH=358
0	0	0	0	0	3	0	2	3		AT3G27700.2;AT3G27700.1	AT3G27700.2;AT3G27700.1	AT3G27700.2 | Symbols: | zinc finger (CCCH-type) family protein / RNA recognition motif (RRM)-containing protein | chr3:10257681-10261330 REVERSE LENGTH=908;AT3G27700.1 | Symbols: | zinc finger (CCCH-type) family protein / RNA recognition motif (RRM)-con
3	3	3	3	3	3	3	3	3		AT3G27660.1	AT3G27660.1	AT3G27660.1 | Symbols: OLEO4, OLE3 | oleosin 4 | chr3:10243851-10244821 FORWARD LENGTH=191
0	0	1	1	2	3	2	2	3		AT3G27310.1	AT3G27310.1	AT3G27310.1 | Symbols: PUX1 | plant UBX domain-containing protein 1 | chr3:10087360-10089077 REVERSE LENGTH=251
3	3	3	3	3	3	3	3	3		AT3G27300.3;AT3G27300.2;AT3G27300.1	AT3G27300.3;AT3G27300.2;AT3G27300.1	AT3G27300.3 | Symbols: G6PD5 | glucose-6-phosphate dehydrogenase 5 | chr3:10083318-10086288 REVERSE LENGTH=516;AT3G27300.2 | Symbols: G6PD5 | glucose-6-phosphate dehydrogenase 5 | chr3:10083318-10086288 REVERSE LENGTH=516;AT3G27300.1 | Symbols: G6PD5 | glu
3	3	3	3	3	3	3	3	3		AT3G27160.1	AT3G27160.1	AT3G27160.1 | Symbols: GHS1 | Ribosomal protein S21 family protein | chr3:10017531-10018854 FORWARD LENGTH=183
0	0	1	3	3	3	0	2	3		AT3G26744.4;AT3G26744.2;AT3G26744.1	AT3G26744.4;AT3G26744.2;AT3G26744.1;AT1G12860.1	AT3G26744.4 | Symbols: ICE1, ATICE1, SCRM | basic helix-loop-helix (bHLH) DNA-binding superfamily protein | chr3:9832953-9834790 REVERSE LENGTH=494;AT3G26744.2 | Symbols: ICE1, ATICE1, SCRM | basic helix-loop-helix (bHLH) DNA-binding superfamily protein |
3	3	3	3	3	3	3	2	3		AT3G26710.1	AT3G26710.1	AT3G26710.1 | Symbols: CCB1 | cofactor assembly of complex C | chr3:9813550-9814606 FORWARD LENGTH=267
3	3	3	3	3	3	3	3	3		AT3G26650.1	AT3G26650.1	AT3G26650.1 | Symbols: GAPA, GAPA-1 | glyceraldehyde 3-phosphate dehydrogenase A subunit | chr3:9795226-9796848 FORWARD LENGTH=396
3	3	3	3	3	3	3	3	3		AT3G26560.1	AT3G26560.1;AT4G16680.1;AT2G35340.1	AT3G26560.1 | Symbols: | ATP-dependent RNA helicase, putative | chr3:9750122-9753719 REVERSE LENGTH=1168
3	3	3	3	3	3	3	3	3		AT3G26520.1	AT3G26520.1	AT3G26520.1 | Symbols: TIP2, SITIP, GAMMA-TIP2, TIP1;2 | tonoplast intrinsic protein 2 | chr3:9722770-9723703 REVERSE LENGTH=253
2	2	3	3	3	3	3	3	3		AT3G26460.1	AT3G26460.1	AT3G26460.1 | Symbols: | Polyketide cyclase/dehydrase and lipid transport superfamily protein | chr3:9684053-9684607 REVERSE LENGTH=152
3	3	3	3	3	3	3	3	3		AT3G26420.1	AT3G26420.1	AT3G26420.1 | Symbols: ATRZ-1A | RNA-binding (RRM/RBD/RNP motifs) family protein with retrovirus zinc finger-like domain | chr3:9671953-9673055 FORWARD LENGTH=245
3	3	3	3	3	3	3	3	3		AT3G26060.1;AT3G26060.2	AT3G26060.1;AT3G26060.2	AT3G26060.1 | Symbols: ATPRX Q | Thioredoxin superfamily protein | chr3:9524807-9526123 FORWARD LENGTH=216;AT3G26060.2 | Symbols: ATPRX Q | Thioredoxin superfamily protein | chr3:9524807-9526123 FORWARD LENGTH=217
3	3	3	3	3	3	3	3	3		AT3G25920.1	AT3G25920.1	AT3G25920.1 | Symbols: RPL15 | ribosomal protein L15 | chr3:9491268-9492558 REVERSE LENGTH=277
3	3	3	3	3	3	3	3	3		AT3G25860.1	AT3G25860.1	AT3G25860.1 | Symbols: LTA2, PLE2 | 2-oxoacid dehydrogenases acyltransferase family protein | chr3:9460632-9462585 FORWARD LENGTH=480
3	3	3	3	3	3	3	3	3		AT3G25800.1;AT3G25800.2	AT3G25800.1;AT3G25800.2	AT3G25800.1 | Symbols: PDF1, PR 65, PP2AA2 | protein phosphatase 2A subunit A2 | chr3:9422822-9425783 REVERSE LENGTH=587;AT3G25800.2 | Symbols: PDF1, PR 65, PP2AA2 | protein phosphatase 2A subunit A2 | chr3:9423036-9425783 REVERSE LENGTH=544
3	3	3	3	3	3	3	3	3		AT3G25660.1	AT3G25660.1	AT3G25660.1 | Symbols: | Amidase family protein | chr3:9339640-9342044 REVERSE LENGTH=537
3	3	3	3	3	3	3	3	3		AT3G25530.2;AT3G25530.1	AT3G25530.2;AT3G25530.1	AT3G25530.2 | Symbols: GHBDH, ATGHBDH, GLYR1, GR1 | glyoxylate reductase 1 | chr3:9271949-9273514 REVERSE LENGTH=278;AT3G25530.1 | Symbols: GHBDH, ATGHBDH, GLYR1, GR1 | glyoxylate reductase 1 | chr3:9271949-9273514 REVERSE LENGTH=289
3	3	3	3	3	3	3	3	3		AT3G25520.1;AT3G25520.2	AT3G25520.1;AT3G25520.2	AT3G25520.1 | Symbols: ATL5, PGY3, OLI5, RPL5A | ribosomal protein L5 | chr3:9269573-9271327 REVERSE LENGTH=301;AT3G25520.2 | Symbols: ATL5 | ribosomal protein L5 | chr3:9269573-9270434 REVERSE LENGTH=190
2	3	3	3	2	3	3	3	3		AT3G25230.1;AT3G25230.2	AT3G25230.1;AT3G25230.2	AT3G25230.1 | Symbols: ROF1, ATFKBP62, FKBP62 | rotamase FKBP 1 | chr3:9188257-9191137 FORWARD LENGTH=551;AT3G25230.2 | Symbols: ROF1, ATFKBP62, FKBP62 | rotamase FKBP 1 | chr3:9188257-9191175 FORWARD LENGTH=562
3	3	3	3	3	1	3	3	3		AT3G25150.1;AT3G25150.2	AT3G25150.1;AT3G25150.2	AT3G25150.1 | Symbols: | Nuclear transport factor 2 (NTF2) family protein with RNA binding (RRM-RBD-RNP motifs) domain | chr3:9157161-9159362 REVERSE LENGTH=488;AT3G25150.2 | Symbols: | Nuclear transport factor 2 (NTF2) family protein with RNA binding (R
0	2	1	3	3	2	3	3	3		AT3G25070.1	AT3G25070.1	AT3G25070.1 | Symbols: RIN4 | RPM1 interacting protein 4 | chr3:9132458-9133747 FORWARD LENGTH=211
3	3	3	3	3	3	3	3	3		AT3G24830.1	AT3G24830.1	AT3G24830.1 | Symbols: | Ribosomal protein L13 family protein | chr3:9064613-9065871 FORWARD LENGTH=206
3	3	3	3	3	3	3	3	3		AT3G24550.1	AT3G24550.1	AT3G24550.1 | Symbols: ATPERK1, PERK1 | proline extensin-like receptor kinase 1 | chr3:8960411-8963303 FORWARD LENGTH=652
3	3	3	3	3	3	3	3	3		AT3G24530.1	AT3G24530.1	AT3G24530.1 | Symbols: | AAA-type ATPase family protein / ankyrin repeat family protein | chr3:8945678-8947786 REVERSE LENGTH=481
3	3	3	3	3	3	3	3	3		AT3G24503.1	AT3G24503.1	AT3G24503.1 | Symbols: ALDH2C4, ALDH1A, REF1 | aldehyde dehydrogenase 2C4 | chr3:8919732-8923029 REVERSE LENGTH=501
3	3	3	3	3	3	3	3	3		AT3G24430.1	AT3G24430.1	AT3G24430.1 | Symbols: HCF101 | ATP binding | chr3:8868731-8872154 REVERSE LENGTH=532
3	3	3	3	3	3	3	3	3		AT3G24170.3;AT3G24170.2;AT3G24170.1	AT3G24170.3;AT3G24170.2;AT3G24170.1	AT3G24170.3 | Symbols: ATGR1, GR1 | glutathione-disulfide reductase | chr3:8729762-8734115 REVERSE LENGTH=499;AT3G24170.2 | Symbols: ATGR1, GR1 | glutathione-disulfide reductase | chr3:8729762-8734115 REVERSE LENGTH=499;AT3G24170.1 | Symbols: ATGR1, GR1 |
0	2	0	3	3	3	3	3	3		AT3G24140.1	AT3G24140.1;AT1G22490.1;AT4G01460.1;AT1G72210.1;AT5G46690.1;AT2G46810.1	AT3G24140.1 | Symbols: FMA | basic helix-loop-helix (bHLH) DNA-binding superfamily protein | chr3:8715525-8717772 REVERSE LENGTH=414
3	2	2	3	3	3	3	3	3		AT3G23990.1	AT3G23990.1	AT3G23990.1 | Symbols: HSP60, HSP60-3B | heat shock protein 60 | chr3:8669013-8672278 FORWARD LENGTH=577
3	3	3	3	3	3	3	3	3		AT3G23900.2;AT3G23900.3;AT3G23900.1	AT3G23900.2;AT3G23900.3;AT3G23900.1	AT3G23900.2 | Symbols: | RNA recognition motif (RRM)-containing protein | chr3:8632717-8635852 REVERSE LENGTH=934;AT3G23900.3 | Symbols: | RNA recognition motif (RRM)-containing protein | chr3:8631941-8635852 REVERSE LENGTH=987;AT3G23900.1 | Symbols: |
1	1	2	2	2	3	0	2	3		AT3G23840.1	AT3G23840.1	AT3G23840.1 | Symbols: | HXXXD-type acyl-transferase family protein | chr3:8611177-8612559 FORWARD LENGTH=420
3	3	3	3	3	3	3	3	3		AT3G23820.1	AT3G23820.1;AT4G00110.1;AT1G02000.1;AT4G12250.1;AT2G45310.1	AT3G23820.1 | Symbols: GAE6 | UDP-D-glucuronate 4-epimerase 6 | chr3:8603645-8605027 FORWARD LENGTH=460
3	3	3	3	3	3	3	3	3		AT3G23810.1	AT3G23810.1	AT3G23810.1 | Symbols: SAHH2, ATSAHH2 | S-adenosyl-l-homocysteine (SAH) hydrolase 2 | chr3:8588013-8589671 REVERSE LENGTH=485
3	3	3	3	3	3	3	3	3		AT3G23750.1	AT3G23750.1;AT2G01820.1	AT3G23750.1 | Symbols: | Leucine-rich repeat protein kinase family protein | chr3:8558332-8561263 FORWARD LENGTH=928
3	3	3	3	3	3	3	3	3		AT3G23700.1	AT3G23700.1	AT3G23700.1 | Symbols: | Nucleic acid-binding proteins superfamily | chr3:8531689-8533742 REVERSE LENGTH=392
3	3	3	3	3	3	3	3	3		AT3G23620.1	AT3G23620.1	AT3G23620.1 | Symbols: | Ribosomal RNA processing Brix domain protein | chr3:8480147-8481873 FORWARD LENGTH=314
0	1	3	3	3	3	3	3	3		AT3G23540.2;AT3G23540.1	AT3G23540.2;AT3G23540.1	AT3G23540.2 | Symbols: | alpha/beta-Hydrolases superfamily protein | chr3:8445381-8448070 FORWARD LENGTH=423;AT3G23540.1 | Symbols: | alpha/beta-Hydrolases superfamily protein | chr3:8443665-8448070 FORWARD LENGTH=566
3	3	3	3	3	3	3	3	3		AT3G23450.1	AT3G23450.1;AT4G14301.1	AT3G23450.1 | Symbols: | unknown protein;FUNCTIONS IN: molecular_function unknown;INVOLVED IN: biological_process unknown;LOCATED IN: endomembrane system;EXPRESSED IN: 14 plant structures;EXPRESSED DURING: 8 growth stages;Has 694543 Blast hits to 47
3	3	3	3	3	3	3	3	3		AT3G22960.1	AT3G22960.1	AT3G22960.1 | Symbols: PKP1, PKP-ALPHA | Pyruvate kinase family protein | chr3:8139369-8141771 FORWARD LENGTH=596
3	3	3	3	3	3	3	3	3		AT3G22890.1	AT3G22890.1	AT3G22890.1 | Symbols: APS1 | ATP sulfurylase 1 | chr3:8112837-8114734 FORWARD LENGTH=463
3	3	3	3	2	3	3	3	3		AT3G22850.1	AT3G22850.1	AT3G22850.1 | Symbols: | Aluminium induced protein with YGL and LRDR motifs | chr3:8089067-8090275 FORWARD LENGTH=248
3	3	3	3	3	3	3	3	3		AT3G22660.1	AT3G22660.1	AT3G22660.1 | Symbols: | rRNA processing protein-related | chr3:8016237-8017118 REVERSE LENGTH=293
3	2	3	3	3	3	3	3	3		AT3G22640.1	AT3G22640.1	AT3G22640.1 | Symbols: PAP85 | cupin family protein | chr3:8011902-8013883 REVERSE LENGTH=486
3	3	3	3	3	3	3	3	3		AT3G22590.1	AT3G22590.1	AT3G22590.1 | Symbols: PHP, CDC73 | PLANT HOMOLOGOUS TO PARAFIBROMIN | chr3:8003999-8005452 FORWARD LENGTH=415
3	3	3	3	3	3	3	3	3		AT3G22430.1	AT3G22430.1	AT3G22430.1 | Symbols: | CONTAINS InterPro DOMAIN/s: Domain of unknown function XS (InterPro:IPR005380);BEST Arabidopsis thaliana protein match is: XS domain-containing protein / XS zinc finger domain-containing protein-related (TAIR:AT5G23570.1);Has 56
1	3	3	3	3	3	3	3	3		AT3G22380.1;AT3G22380.2	AT3G22380.1;AT3G22380.2	AT3G22380.1 | Symbols: TIC | time for coffee | chr3:7913181-7918879 FORWARD LENGTH=1550;AT3G22380.2 | Symbols: TIC | time for coffee | chr3:7913181-7918967 FORWARD LENGTH=1555
3	3	3	3	3	3	3	3	3		AT3G22330.1	AT3G22330.1	AT3G22330.1 | Symbols: PMH2, ATRH53 | putative mitochondrial RNA helicase 2 | chr3:7892641-7895145 FORWARD LENGTH=616
3	3	3	3	3	3	3	3	3		AT3G22320.1	AT3G22320.1	AT3G22320.1 | Symbols: ATRPABC24.3, RPB5A, NRPB5, NRPD5 | Eukaryotic rpb5 RNA polymerase subunit family protein | chr3:7891045-7892094 REVERSE LENGTH=205
3	3	3	3	3	3	3	3	3		AT3G22310.1	AT3G22310.1	AT3G22310.1 | Symbols: PMH1, ATRH9 | putative mitochondrial RNA helicase 1 | chr3:7887382-7889806 FORWARD LENGTH=610
3	3	3	3	3	3	3	3	3		AT3G22300.1	AT3G22300.1	AT3G22300.1 | Symbols: RPS10 | ribosomal protein S10 | chr3:7885737-7886613 FORWARD LENGTH=241
3	3	3	3	3	3	3	3	3		AT3G22230.1	AT3G22230.1;AT2G32220.1	AT3G22230.1 | Symbols: | Ribosomal L27e protein family | chr3:7844136-7844543 REVERSE LENGTH=135
3	3	3	3	3	3	3	3	3		AT3G22200.1;AT3G22200.2	AT3G22200.1;AT3G22200.2	AT3G22200.1 | Symbols: POP2, GABA-T, HER1 | Pyridoxal phosphate (PLP)-dependent transferases superfamily protein | chr3:7835286-7838863 FORWARD LENGTH=504;AT3G22200.2 | Symbols: POP2 | Pyridoxal phosphate (PLP)-dependent transferases superfamily protein |
3	3	3	3	3	3	3	3	3		AT3G22170.2;AT3G22170.1	AT3G22170.2;AT3G22170.1	AT3G22170.2 | Symbols: FHY3 | far-red elongated hypocotyls 3 | chr3:7822359-7825414 REVERSE LENGTH=839;AT3G22170.1 | Symbols: FHY3 | far-red elongated hypocotyls 3 | chr3:7822359-7825414 REVERSE LENGTH=839
3	3	3	3	3	3	3	3	3		AT3G22110.1	AT3G22110.1;AT4G15165.1	AT3G22110.1 | Symbols: PAC1 | 20S proteasome alpha subunit C1 | chr3:7792819-7793571 REVERSE LENGTH=250
3	3	3	3	3	3	3	3	3		AT3G21810.1	AT3G21810.1	AT3G21810.1 | Symbols: | Zinc finger C-x8-C-x5-C-x3-H type family protein | chr3:7684852-7688360 FORWARD LENGTH=437
3	3	3	3	3	3	3	3	3		AT3G21720.1	AT3G21720.1	AT3G21720.1 | Symbols: ICL | isocitrate lyase | chr3:7652789-7655873 REVERSE LENGTH=576
3	3	3	3	3	3	3	3	3		AT3G21540.1	AT3G21540.1	AT3G21540.1 | Symbols: | transducin family protein / WD-40 repeat family protein | chr3:7586100-7590856 REVERSE LENGTH=955
1	1	0	3	3	3	3	3	1		AT3G21380.1	AT3G21380.1	AT3G21380.1 | Symbols: | Mannose-binding lectin superfamily protein | chr3:7528478-7530457 FORWARD LENGTH=460
3	3	3	3	3	3	3	3	3		AT3G21220.1;AT1G51660.1	AT3G21220.1;AT1G51660.1	AT3G21220.1 | Symbols: ATMKK5, ATMAP2K_ALPHA, MAP2K_A, MKK5, ATMEK5, MEK5 | MAP kinase kinase 5 | chr3:7445917-7446963 FORWARD LENGTH=348;AT1G51660.1 | Symbols: ATMKK4, MKK4, ATMEK4 | mitogen-activated protein kinase kinase 4 | chr1:19154575-19155675 FORWA
3	3	3	3	3	3	3	3	3		AT3G21200.1	AT3G21200.1	AT3G21200.1 | Symbols: PGR7 | proton gradient regulation 7 | chr3:7436091-7437845 FORWARD LENGTH=317
3	3	2	3	3	3	2	3	3		AT3G21110.2;AT3G21110.1	AT3G21110.2;AT3G21110.1	AT3G21110.2 | Symbols: PUR7, PURC | purin 7 | chr3:7402696-7405273 REVERSE LENGTH=411;AT3G21110.1 | Symbols: PUR7, PURC, ATPURC | purin 7 | chr3:7402696-7405273 REVERSE LENGTH=411
3	3	3	3	3	3	3	3	3		AT3G20820.1	AT3G20820.1	AT3G20820.1 | Symbols: | Leucine-rich repeat (LRR) family protein | chr3:7280930-7282027 FORWARD LENGTH=365
3	3	3	3	3	3	3	3	3		AT3G20810.3;AT3G20810.1;AT3G20810.2	AT3G20810.3;AT3G20810.1;AT3G20810.2	AT3G20810.3 | Symbols: JMJD5 | 2-oxoglutarate (2OG) and Fe(II)-dependent oxygenase superfamily protein | chr3:7275814-7278182 FORWARD LENGTH=398;AT3G20810.1 | Symbols: JMJD5 | 2-oxoglutarate (2OG) and Fe(II)-dependent oxygenase superfamily protein | chr3:7
3	3	3	3	3	3	3	3	3		AT3G20780.1	AT3G20780.1	AT3G20780.1 | Symbols: ATTOP6B, BIN3, HYP6, RHL3, TOP6B | topoisomerase 6 subunit B | chr3:7264025-7268498 REVERSE LENGTH=670
2	3	3	3	3	3	3	3	3		AT3G20630.1	AT3G20630.1	AT3G20630.1 | Symbols: UBP14, TTN6, ATUBP14, PER1 | ubiquitin-specific protease 14 | chr3:7203001-7208340 REVERSE LENGTH=797
3	3	3	3	2	3	3	3	3		AT3G20550.1	AT3G20550.1	AT3G20550.1 | Symbols: DDL | SMAD/FHA domain-containing protein | chr3:7174695-7177600 REVERSE LENGTH=314
2	3	3	3	3	3	3	3	3		AT3G20370.1	AT3G20370.1	AT3G20370.1 | Symbols: | TRAF-like family protein | chr3:7105481-7107079 FORWARD LENGTH=379
3	3	3	3	3	3	3	3	3		AT3G20330.1	AT3G20330.1	AT3G20330.1 | Symbols: PYRB | PYRIMIDINE B | chr3:7090354-7091904 REVERSE LENGTH=390
3	3	3	3	3	3	3	3	3		AT3G20050.1	AT3G20050.1	AT3G20050.1 | Symbols: ATTCP-1, TCP-1 | T-complex protein 1 alpha subunit | chr3:6998544-7002266 REVERSE LENGTH=545
3	3	3	3	3	3	3	3	3		AT3G20000.1	AT3G20000.1	AT3G20000.1 | Symbols: TOM40 | translocase of the outer mitochondrial membrane 40 | chr3:6967685-6970247 FORWARD LENGTH=309
3	3	3	3	3	3	3	3	3		AT3G19980.1;AT1G50370.1	AT3G19980.1;AT1G50370.1	AT3G19980.1 | Symbols: ATFYPP3, EMB2736, STPP, FYPP3 | flower-specific, phytochrome-associated protein phosphatase 3 | chr3:6962008-6964761 FORWARD LENGTH=303;AT1G50370.1 | Symbols: | Calcineurin-like metallo-phosphoesterase superfamily protein | chr1:186
3	3	3	3	3	3	3	3	3		AT3G19960.1;AT3G19960.2	AT3G19960.1;AT3G19960.2;AT1G50360.1	AT3G19960.1 | Symbols: ATM1 | myosin 1 | chr3:6949787-6956736 FORWARD LENGTH=1166;AT3G19960.2 | Symbols: ATM1 | myosin 1 | chr3:6949787-6956736 FORWARD LENGTH=1176
3	3	3	3	3	3	3	3	3		AT3G19820.3;AT3G19820.2;AT3G19820.1	AT3G19820.3;AT3G19820.2;AT3G19820.1	AT3G19820.3 | Symbols: DWF1 | cell elongation protein / DWARF1 / DIMINUTO (DIM) | chr3:6879835-6881616 REVERSE LENGTH=561;AT3G19820.2 | Symbols: DWF1, DIM, EVE1, DIM1, CBB1 | cell elongation protein / DWARF1 / DIMINUTO (DIM) | chr3:6879835-6881616 REVERSE
3	3	3	3	3	3	3	3	3		AT3G19800.2;AT3G19800.1	AT3G19800.2;AT3G19800.1	AT3G19800.2 | Symbols: | Protein of unknown function (DUF177) | chr3:6876153-6877471 FORWARD LENGTH=226;AT3G19800.1 | Symbols: | Protein of unknown function (DUF177) | chr3:6876153-6877471 FORWARD LENGTH=229
3	3	3	3	3	3	3	3	3		AT3G19760.1	AT3G19760.1;AT1G51380.1	AT3G19760.1 | Symbols: EIF4A-III | eukaryotic initiation factor 4A-III | chr3:6863790-6866242 FORWARD LENGTH=408
3	3	3	3	3	3	3	3	3		AT3G19480.1	AT3G19480.1	AT3G19480.1 | Symbols: | D-3-phosphoglycerate dehydrogenase | chr3:6752590-6754650 FORWARD LENGTH=588
2	3	3	2	3	3	3	3	3		AT3G19450.1	AT3G19450.1;AT4G34230.2;AT4G34230.1	AT3G19450.1 | Symbols: CAD4, ATCAD4, CAD, CAD-C | GroES-like zinc-binding alcohol dehydrogenase family protein | chr3:6744859-6747005 FORWARD LENGTH=365
3	3	3	3	3	3	3	3	3		AT3G19420.1	AT3G19420.1	AT3G19420.1 | Symbols: ATPEN2, PEN2 | PTEN 2 | chr3:6731824-6735354 FORWARD LENGTH=611
3	3	3	3	3	3	3	3	3		AT3G19240.1	AT3G19240.1	AT3G19240.1 | Symbols: | Vacuolar import/degradation, Vid27-related protein | chr3:6664383-6666423 FORWARD LENGTH=648
3	3	3	3	3	3	3	3	3		AT3G19170.1;AT3G19170.2	AT3G19170.1;AT3G19170.2	AT3G19170.1 | Symbols: ATPREP1, ATZNMP, PREP1 | presequence protease 1 | chr3:6625578-6631874 REVERSE LENGTH=1080;AT3G19170.2 | Symbols: PREP1 | presequence protease 1 | chr3:6625578-6631874 REVERSE LENGTH=1069
3	3	3	3	3	3	3	3	3		AT3G19130.1	AT3G19130.1	AT3G19130.1 | Symbols: ATRBP47B, RBP47B | RNA-binding protein 47B | chr3:6611398-6613823 REVERSE LENGTH=435
3	3	3	3	3	3	3	2	3		AT3G19040.1	AT3G19040.1	AT3G19040.1 | Symbols: TAF1, TAF1B, HAF2 | histone acetyltransferase of the TAFII250 family 2 | chr3:6567157-6575282 REVERSE LENGTH=1786
3	3	3	3	3	3	3	3	3		AT3G18990.1	AT3G18990.1	AT3G18990.1 | Symbols: VRN1, REM39 | AP2/B3-like transcriptional factor family protein | chr3:6549077-6551568 REVERSE LENGTH=341
3	3	3	3	3	3	3	3	3		AT3G18860.1;AT3G18860.2	AT3G18860.1;AT3G18860.2	AT3G18860.1 | Symbols: | transducin family protein / WD-40 repeat family protein | chr3:6501774-6508352 FORWARD LENGTH=760;AT3G18860.2 | Symbols: | transducin family protein / WD-40 repeat family protein | chr3:6501774-6508352 FORWARD LENGTH=760
3	3	3	3	3	3	3	3	3		AT3G18820.1	AT3G18820.1	AT3G18820.1 | Symbols: ATRABG3F, ATRAB7B, RAB71, RABG3F, RAB7B | RAB GTPase homolog G3F | chr3:6484266-6486005 FORWARD LENGTH=206
0	0	1	2	3	3	3	2	3		AT3G18790.1	AT3G18790.1	AT3G18790.1 | Symbols: | FUNCTIONS IN: molecular_function unknown;INVOLVED IN: biological_process unknown;LOCATED IN: chloroplast;EXPRESSED IN: 22 plant structures;EXPRESSED DURING: 13 growth stages;CONTAINS InterPro DOMAIN/s: Isy1-like splicing (Int
3	3	3	3	3	3	3	3	3		AT3G18780.2;AT1G49240.1;AT3G18780.1	AT3G18780.2;AT1G49240.1;AT3G18780.1	AT3G18780.2 | Symbols: ACT2, DER1, LSR2, ENL2 | actin 2 | chr3:6475535-6476832 FORWARD LENGTH=377;AT1G49240.1 | Symbols: ACT8 | actin 8 | chr1:18216539-18217947 FORWARD LENGTH=377;AT3G18780.1 | Symbols: ACT2, DER1, LSR2, ENL2 | actin 2 | chr3:6475535-64767
3	3	3	3	3	3	3	3	3		AT3G18740.1;AT1G36240.1	AT3G18740.1;AT1G36240.1	AT3G18740.1 | Symbols: | Ribosomal protein L7Ae/L30e/S12e/Gadd45 family protein | chr3:6453437-6453870 FORWARD LENGTH=112;AT1G36240.1 | Symbols: | Ribosomal protein L7Ae/L30e/S12e/Gadd45 family protein | chr1:13614890-13616233 FORWARD LENGTH=112
3	3	3	3	3	3	3	3	3		AT3G18600.1	AT3G18600.1	AT3G18600.1 | Symbols: | P-loop containing nucleoside triphosphate hydrolases superfamily protein | chr3:6399724-6403007 REVERSE LENGTH=568
3	3	3	3	3	3	3	3	3		AT3G18520.1;AT3G18520.2	AT3G18520.1;AT3G18520.2	AT3G18520.1 | Symbols: HDA15, ATHDA15 | histone deacetylase 15 | chr3:6361605-6365367 FORWARD LENGTH=552;AT3G18520.2 | Symbols: HDA15, ATHDA15 | histone deacetylase 15 | chr3:6361605-6365399 FORWARD LENGTH=564
3	3	3	3	3	3	3	3	3		AT3G18490.1	AT3G18490.1	AT3G18490.1 | Symbols: | Eukaryotic aspartyl protease family protein | chr3:6349090-6350592 REVERSE LENGTH=500
3	3	3	3	3	3	3	3	3		AT3G18390.1	AT3G18390.1	AT3G18390.1 | Symbols: EMB1865 | CRS1 / YhbY (CRM) domain-containing protein | chr3:6313572-6317584 FORWARD LENGTH=848
3	3	3	3	3	3	3	3	3		AT3G18190.1	AT3G18190.1	AT3G18190.1 | Symbols: | TCP-1/cpn60 chaperonin family protein | chr3:6232226-6233836 FORWARD LENGTH=536
1	0	1	3	3	3	3	3	3		AT3G18140.1;AT3G18140.2	AT3G18140.1;AT3G18140.2;AT2G22040.1	AT3G18140.1 | Symbols: | Transducin/WD40 repeat-like superfamily protein | chr3:6212743-6214567 REVERSE LENGTH=305;AT3G18140.2 | Symbols: | Transducin/WD40 repeat-like superfamily protein | chr3:6213225-6214567 REVERSE LENGTH=224
3	3	3	3	3	3	3	3	3		AT3G18130.1	AT3G18130.1	AT3G18130.1 | Symbols: RACK1C_AT | receptor for activated C kinase 1C | chr3:6211109-6212371 REVERSE LENGTH=326
3	3	3	3	3	3	3	3	3		AT3G18080.1	AT3G18080.1;AT3G18070.2;AT3G18070.1	AT3G18080.1 | Symbols: BGLU44 | B-S glucosidase 44 | chr3:6191586-6194124 FORWARD LENGTH=512
3	3	3	3	3	3	3	3	3		AT3G18060.1	AT3G18060.1	AT3G18060.1 | Symbols: | transducin family protein / WD-40 repeat family protein | chr3:6183880-6186788 FORWARD LENGTH=609
3	3	3	3	3	3	3	3	3		AT3G18035.1	AT3G18035.1	AT3G18035.1 | Symbols: HON4 | winged-helix DNA-binding transcription factor family protein | chr3:6169384-6171558 REVERSE LENGTH=480
3	3	3	3	3	3	3	3	3		AT3G17970.1	AT3G17970.1	AT3G17970.1 | Symbols: atToc64-III, TOC64-III | translocon at the outer membrane of chloroplasts 64-III | chr3:6148030-6151794 FORWARD LENGTH=589
3	3	3	3	3	3	3	3	3		AT3G17820.1	AT3G17820.1	AT3G17820.1 | Symbols: ATGSKB6, GLN1.3, GLN1;3 | glutamine synthetase 1.3 | chr3:6097503-6099408 FORWARD LENGTH=354
3	3	3	3	3	3	3	3	3		AT3G17410.1	AT3G17410.1	AT3G17410.1 | Symbols: | Protein kinase superfamily protein | chr3:5956601-5958882 FORWARD LENGTH=364
3	3	3	3	3	3	3	3	3		AT3G17390.1	AT3G17390.1	AT3G17390.1 | Symbols: MTO3, SAMS3, MAT4 | S-adenosylmethionine synthetase family protein | chr3:5952484-5953665 REVERSE LENGTH=393
3	3	3	3	3	3	3	3	3		AT3G17240.3;AT3G17240.1	AT3G17240.3;AT3G17240.1	AT3G17240.3 | Symbols: mtLPD2 | lipoamide dehydrogenase 2 | chr3:5890278-5892166 REVERSE LENGTH=507;AT3G17240.1 | Symbols: mtLPD2 | lipoamide dehydrogenase 2 | chr3:5890278-5892166 REVERSE LENGTH=507
3	3	3	3	3	3	3	3	3		AT3G17020.1	AT3G17020.1	AT3G17020.1 | Symbols: | Adenine nucleotide alpha hydrolases-like superfamily protein | chr3:5802728-5804063 REVERSE LENGTH=163
3	3	3	3	3	3	3	3	3		AT3G16840.1	AT3G16840.1	AT3G16840.1 | Symbols: | P-loop containing nucleoside triphosphate hydrolases superfamily protein | chr3:5738020-5743042 REVERSE LENGTH=826
3	3	3	3	3	3	3	3	3		AT3G16830.1	AT3G16830.1	AT3G16830.1 | Symbols: TPR2 | TOPLESS-related 2 | chr3:5731709-5737531 FORWARD LENGTH=1131
2	3	3	3	3	3	3	3	3		AT3G16810.1	AT3G16810.1	AT3G16810.1 | Symbols: APUM24, PUM24 | pumilio 24 | chr3:5723436-5727539 REVERSE LENGTH=641
3	3	3	3	3	3	3	3	3		AT3G16780.1	AT3G16780.1	AT3G16780.1 | Symbols: | Ribosomal protein L19e family protein | chr3:5708982-5710249 FORWARD LENGTH=209
3	3	3	3	3	3	3	3	3		AT3G16640.1	AT3G16640.1	AT3G16640.1 | Symbols: TCTP | translationally controlled tumor protein | chr3:5669709-5670729 REVERSE LENGTH=168
3	3	3	3	3	3	3	3	3		AT3G16520.3;AT3G16520.2;AT3G16520.1	AT3G16520.3;AT3G16520.2;AT3G16520.1	AT3G16520.3 | Symbols: UGT88A1 | UDP-glucosyl transferase 88A1 | chr3:5619355-5620833 REVERSE LENGTH=462;AT3G16520.2 | Symbols: UGT88A1 | UDP-glucosyl transferase 88A1 | chr3:5618847-5620833 REVERSE LENGTH=446;AT3G16520.1 | Symbols: UGT88A1 | UDP-glucosyl
3	3	3	3	3	3	3	3	3		AT3G16460.2;AT3G16460.1	AT3G16460.2;AT3G16460.1	AT3G16460.2 | Symbols: | Mannose-binding lectin superfamily protein | chr3:5593029-5595522 FORWARD LENGTH=705;AT3G16460.1 | Symbols: | Mannose-binding lectin superfamily protein | chr3:5593029-5595522 FORWARD LENGTH=705
3	3	3	3	3	3	3	3	3		AT3G16450.3;AT3G16450.2;AT3G16450.1	AT3G16450.3;AT3G16450.2;AT3G16450.1	AT3G16450.3 | Symbols: | Mannose-binding lectin superfamily protein | chr3:5588593-5589792 FORWARD LENGTH=300;AT3G16450.2 | Symbols: | Mannose-binding lectin superfamily protein | chr3:5588593-5589792 FORWARD LENGTH=300;AT3G16450.1 | Symbols: | Mannose-
3	3	3	3	3	3	3	3	3		AT3G16420.3;AT3G16420.2;AT3G16420.1	AT3G16420.3;AT3G16420.2;AT3G16420.1;AT3G16430.2;AT3G16430.1	AT3G16420.3 | Symbols: PBP1 | PYK10-binding protein 1 | chr3:5579560-5580674 FORWARD LENGTH=298;AT3G16420.2 | Symbols: PBP1 | PYK10-binding protein 1 | chr3:5579560-5580674 FORWARD LENGTH=298;AT3G16420.1 | Symbols: PBP1, JAL30 | PYK10-binding protein 1 | c
3	3	3	3	3	3	3	3	3		AT3G16400.2;AT3G16400.1	AT3G16400.2;AT3G16400.1;AT3G16390.1	AT3G16400.2 | Symbols: ATMLP-470 | nitrile specifier protein 1 | chr3:5566516-5568330 FORWARD LENGTH=470;AT3G16400.1 | Symbols: ATMLP-470, NSP1, ATNSP1 | nitrile specifier protein 1 | chr3:5566516-5568330 FORWARD LENGTH=470
3	3	3	3	3	3	3	3	3		AT3G16290.1	AT3G16290.1	AT3G16290.1 | Symbols: EMB2083 | AAA-type ATPase family protein | chr3:5521187-5524995 REVERSE LENGTH=876
3	3	3	3	3	3	3	3	3		AT3G16080.1	AT3G16080.1	AT3G16080.1 | Symbols: | Zinc-binding ribosomal protein family protein | chr3:5454892-5455677 FORWARD LENGTH=95
3	3	3	3	3	3	3	3	3		AT3G15980.1;AT3G15980.4;AT3G15980.3;AT3G15980.2;AT3G15980.5	AT3G15980.1;AT3G15980.4;AT3G15980.3;AT3G15980.2;AT3G15980.5	AT3G15980.1 | Symbols: | Coatomer, beta subunit | chr3:5411699-5418313 REVERSE LENGTH=909;AT3G15980.4 | Symbols: | Coatomer, beta subunit | chr3:5411699-5418313 REVERSE LENGTH=914;AT3G15980.3 | Symbols: | Coatomer, beta subunit | chr3:5412015-5418313
3	3	3	3	3	3	3	3	3		AT3G15880.3;AT3G15880.1;AT3G15880.2	AT3G15880.3;AT3G15880.1;AT3G15880.2	AT3G15880.3 | Symbols: WSIP2 | WUS-interacting protein 2 | chr3:5364792-5371869 REVERSE LENGTH=1125;AT3G15880.1 | Symbols: WSIP2, TPR4 | WUS-interacting protein 2 | chr3:5364792-5371869 REVERSE LENGTH=1135;AT3G15880.2 | Symbols: WSIP2, TPR4 | WUS-interacti
3	3	3	3	3	3	3	3	3		AT3G15730.1	AT3G15730.1;AT5G25370.1	AT3G15730.1 | Symbols: PLDALPHA1, PLD | phospholipase D alpha 1 | chr3:5330835-5333474 FORWARD LENGTH=810
3	3	3	3	3	3	3	3	3		AT3G15690.2;AT3G15690.1	AT3G15690.2;AT3G15690.1	AT3G15690.2 | Symbols: | Single hybrid motif superfamily protein | chr3:5317108-5319435 FORWARD LENGTH=263;AT3G15690.1 | Symbols: | Single hybrid motif superfamily protein | chr3:5317108-5319383 FORWARD LENGTH=247
3	3	3	3	3	3	3	3	3		AT3G15680.1	AT3G15680.1	AT3G15680.1 | Symbols: | Ran BP2/NZF zinc finger-like superfamily protein | chr3:5315437-5316048 FORWARD LENGTH=164
3	3	2	2	2	3	3	3	3		AT3G15670.1	AT3G15670.1	AT3G15670.1 | Symbols: | Late embryogenesis abundant protein (LEA) family protein | chr3:5310141-5310901 REVERSE LENGTH=225
3	3	3	3	3	3	3	3	3		AT3G15610.1	AT3G15610.1	AT3G15610.1 | Symbols: | Transducin/WD40 repeat-like superfamily protein | chr3:5291076-5292796 REVERSE LENGTH=341
3	3	3	3	3	3	3	3	3		AT3G15590.1	AT3G15590.1	AT3G15590.1 | Symbols: | Tetratricopeptide repeat (TPR)-like superfamily protein | chr3:5275568-5277658 REVERSE LENGTH=610
2	3	3	3	3	3	3	3	3		AT3G15360.1	AT3G15360.1	AT3G15360.1 | Symbols: ATHM4, TRX-M4, ATM4 | thioredoxin M-type 4 | chr3:5188448-5189457 FORWARD LENGTH=193
3	3	3	3	3	3	3	3	3		AT3G15190.1	AT3G15190.1	AT3G15190.1 | Symbols: | chloroplast 30S ribosomal protein S20, putative | chr3:5116216-5117412 FORWARD LENGTH=202
1	1	3	3	3	3	1	3	3		AT3G15090.1	AT3G15090.1	AT3G15090.1 | Symbols: | GroES-like zinc-binding alcohol dehydrogenase family protein | chr3:5076847-5078870 FORWARD LENGTH=366
3	3	3	3	3	3	3	3	3		AT3G15010.2;AT3G15010.1	AT3G15010.2;AT3G15010.1	AT3G15010.2 | Symbols: | RNA-binding (RRM/RBD/RNP motifs) family protein | chr3:5052844-5054058 FORWARD LENGTH=404;AT3G15010.1 | Symbols: | RNA-binding (RRM/RBD/RNP motifs) family protein | chr3:5052844-5054058 FORWARD LENGTH=404
3	3	3	3	3	3	3	3	3		AT3G15000.1	AT3G15000.1;AT1G53260.2;AT1G53260.1	AT3G15000.1 | Symbols: | cobalt ion binding | chr3:5050321-5052121 FORWARD LENGTH=395
3	3	3	3	3	3	3	3	3		AT3G14990.1;AT3G14990.3;AT3G14990.2	AT3G14990.1;AT3G14990.3;AT3G14990.2	AT3G14990.1 | Symbols: | Class I glutamine amidotransferase-like superfamily protein | chr3:5047510-5049621 FORWARD LENGTH=392;AT3G14990.3 | Symbols: | Class I glutamine amidotransferase-like superfamily protein | chr3:5047683-5049621 FORWARD LENGTH=369;
3	3	3	3	3	3	3	3	3		AT3G14940.1	AT3G14940.1	AT3G14940.1 | Symbols: ATPPC3, PPC3 | phosphoenolpyruvate carboxylase 3 | chr3:5025584-5029476 FORWARD LENGTH=968
3	3	3	3	3	3	3	3	3		AT3G14840.2	AT3G14840.2	AT3G14840.2 | Symbols: | Leucine-rich repeat transmembrane protein kinase | chr3:4988271-4993891 FORWARD LENGTH=1020
3	3	3	3	3	3	3	3	3		AT3G14790.1	AT3G14790.1	AT3G14790.1 | Symbols: RHM3, ATRHM3 | rhamnose biosynthesis 3 | chr3:4964791-4966875 FORWARD LENGTH=664
3	3	2	3	3	3	3	2	3		AT3G14750.1	AT3G14750.1	AT3G14750.1 | Symbols: | unknown protein;BEST Arabidopsis thaliana protein match is: unknown protein (TAIR:AT1G67170.1);Has 4036 Blast hits to 3091 proteins in 519 species: Archae - 61;Bacteria - 669;Metazoa - 1503;Fungi - 255;Plants - 421;Viruses
3	3	3	3	3	3	3	3	3		AT3G14600.1	AT3G14600.1	AT3G14600.1 | Symbols: | Ribosomal protein L18ae/LX family protein | chr3:4910773-4911933 FORWARD LENGTH=178
3	3	3	3	3	3	3	3	3		AT3G14420.2;AT3G14420.1;AT3G14420.4;AT3G14420.3;AT3G14420.5;AT3G14420.6	AT3G14420.2;AT3G14420.1;AT3G14420.4;AT3G14420.3;AT3G14420.5;AT3G14420.6;AT4G18360.2	AT3G14420.2 | Symbols: | Aldolase-type TIM barrel family protein | chr3:4821804-4823899 FORWARD LENGTH=367;AT3G14420.1 | Symbols: | Aldolase-type TIM barrel family protein | chr3:4821804-4823899 FORWARD LENGTH=367;AT3G14420.4 | Symbols: | Aldolase-type
3	3	3	3	3	3	3	3	3		AT3G14415.3;AT3G14415.1;AT3G14415.2	AT3G14415.3;AT3G14415.1;AT3G14415.2	AT3G14415.3 | Symbols: | Aldolase-type TIM barrel family protein | chr3:4818667-4820748 FORWARD LENGTH=367;AT3G14415.1 | Symbols: | Aldolase-type TIM barrel family protein | chr3:4818667-4820748 FORWARD LENGTH=367;AT3G14415.2 | Symbols: | Aldolase-type
3	3	3	3	3	3	3	3	3		AT3G14390.1	AT3G14390.1	AT3G14390.1 | Symbols: | Pyridoxal-dependent decarboxylase family protein | chr3:4806771-4808954 FORWARD LENGTH=484
3	3	3	3	3	3	3	3	3		AT3G14310.1	AT3G14310.1;AT1G53830.1;AT4G02320.1;AT2G26440.1;AT1G23200.1;AT1G02810.1;AT5G53370.1;AT3G49220.1;AT4G15980.1	AT3G14310.1 | Symbols: ATPME3, PME3 | pectin methylesterase 3 | chr3:4772214-4775095 REVERSE LENGTH=592
3	1	2	2	3	3	3	3	3		AT3G14180.1	AT3G14180.1	AT3G14180.1 | Symbols: | sequence-specific DNA binding transcription factors | chr3:4707290-4708621 REVERSE LENGTH=443
3	3	3	3	3	3	3	3	3		AT3G14100.1	AT3G14100.1	AT3G14100.1 | Symbols: | RNA-binding (RRM/RBD/RNP motifs) family protein | chr3:4673027-4675950 FORWARD LENGTH=427
3	3	3	3	3	3	3	3	3		AT3G13930.1	AT3G13930.1	AT3G13930.1 | Symbols: | Dihydrolipoamide acetyltransferase, long form protein | chr3:4596240-4600143 FORWARD LENGTH=539
3	3	3	3	3	3	3	3	3		AT3G13920.1;AT3G13920.3;AT3G13920.4;AT3G13920.2	AT3G13920.1;AT3G13920.3;AT3G13920.4;AT3G13920.2	AT3G13920.1 | Symbols: EIF4A1, RH4, TIF4A1 | eukaryotic translation initiation factor 4A1 | chr3:4592635-4594128 REVERSE LENGTH=412;AT3G13920.3 | Symbols: EIF4A1, RH4, TIF4A1 | eukaryotic translation initiation factor 4A1 | chr3:4592635-4594094 REVERSE LEN
3	3	3	3	3	3	3	3	3		AT3G13870.1;AT3G13870.2	AT3G13870.1;AT3G13870.2;AT1G72960.1	AT3G13870.1 | Symbols: RHD3 | Root hair defective 3 GTP-binding protein (RHD3) | chr3:4565762-4571109 REVERSE LENGTH=802;AT3G13870.2 | Symbols: RHD3 | Root hair defective 3 GTP-binding protein (RHD3) | chr3:4565762-4570261 REVERSE LENGTH=738
3	3	3	3	3	3	3	3	3		AT3G13790.2;AT3G13790.1	AT3G13790.2;AT3G13790.1	AT3G13790.2 | Symbols: ATBFRUCT1 | Glycosyl hydrolases family 32 protein | chr3:4533084-4535831 REVERSE LENGTH=581;AT3G13790.1 | Symbols: ATCWINV1, ATBFRUCT1 | Glycosyl hydrolases family 32 protein | chr3:4533084-4535831 REVERSE LENGTH=584
3	3	3	3	3	3	3	3	3		AT3G13750.1	AT3G13750.1	AT3G13750.1 | Symbols: BGAL1 | beta galactosidase 1 | chr3:4511192-4515756 FORWARD LENGTH=847
3	3	3	3	3	3	3	3	3		AT3G13670.1	AT3G13670.1;AT3G03930.1	AT3G13670.1 | Symbols: | Protein kinase family protein | chr3:4469434-4473234 FORWARD LENGTH=703
3	3	3	3	3	3	3	3	3		AT3G13570.1	AT3G13570.1	AT3G13570.1 | Symbols: SCL30A, At-SCL30A | SC35-like splicing factor 30A | chr3:4429564-4431602 REVERSE LENGTH=262
3	3	3	3	3	3	3	3	3		AT3G13490.1	AT3G13490.1	AT3G13490.1 | Symbols: OVA5, ATKRS-2 | Lysyl-tRNA synthetase, class II | chr3:4395984-4399302 REVERSE LENGTH=602
3	3	3	3	3	3	3	3	3		AT3G13470.1	AT3G13470.1	AT3G13470.1 | Symbols: | TCP-1/cpn60 chaperonin family protein | chr3:4389685-4392624 FORWARD LENGTH=596
2	3	3	3	3	3	3	3	3		AT3G13460.2;AT3G13460.4;AT3G13460.1;AT3G13460.3	AT3G13460.2;AT3G13460.4;AT3G13460.1;AT3G13460.3;AT5G61020.2;AT5G61020.1;AT1G55500.1;AT1G55500.3;AT1G55500.2	AT3G13460.2 | Symbols: ECT2 | evolutionarily conserved C-terminal region 2 | chr3:4385274-4388220 REVERSE LENGTH=664;AT3G13460.4 | Symbols: ECT2 | evolutionarily conserved C-terminal region 2 | chr3:4385274-4388220 REVERSE LENGTH=666;AT3G13460.1 | Symbols:
2	3	3	3	3	3	3	3	3		AT3G13330.1	AT3G13330.1	AT3G13330.1 | Symbols: PA200 | proteasome activating protein 200 | chr3:4319804-4330061 REVERSE LENGTH=1816
3	3	3	3	3	3	3	3	3		AT3G13300.2;AT3G13300.1	AT3G13300.2;AT3G13300.1	AT3G13300.2 | Symbols: VCS | Transducin/WD40 repeat-like superfamily protein | chr3:4304085-4309949 FORWARD LENGTH=1309;AT3G13300.1 | Symbols: VCS | Transducin/WD40 repeat-like superfamily protein | chr3:4304085-4309949 FORWARD LENGTH=1344
0	1	2	3	3	3	3	3	3		AT3G13235.3;AT3G13235.2;AT3G13235.1	AT3G13235.3;AT3G13235.2;AT3G13235.1	AT3G13235.3 | Symbols: | ubiquitin family protein | chr3:4271492-4274348 REVERSE LENGTH=413;AT3G13235.2 | Symbols: | ubiquitin family protein | chr3:4271492-4274348 REVERSE LENGTH=414;AT3G13235.1 | Symbols: | ubiquitin family protein | chr3:4271492-4274
3	3	3	3	3	3	3	3	3		AT3G13224.2;AT3G13224.1	AT3G13224.2;AT3G13224.1	AT3G13224.2 | Symbols: | RNA-binding (RRM/RBD/RNP motifs) family protein | chr3:4254848-4256621 FORWARD LENGTH=358;AT3G13224.1 | Symbols: | RNA-binding (RRM/RBD/RNP motifs) family protein | chr3:4254848-4256014 FORWARD LENGTH=231
3	3	3	3	3	3	3	3	3		AT3G13180.1	AT3G13180.1	AT3G13180.1 | Symbols: | NOL1/NOP2/sun family protein / antitermination NusB domain-containing protein | chr3:4236326-4239966 REVERSE LENGTH=523
3	3	3	3	3	3	3	3	3		AT3G13160.1	AT3G13160.1	AT3G13160.1 | Symbols: | Tetratricopeptide repeat (TPR)-like superfamily protein | chr3:4229994-4231178 REVERSE LENGTH=394
3	3	3	3	3	3	3	3	3		AT3G13120.2;AT3G13120.1	AT3G13120.2;AT3G13120.1	AT3G13120.2 | Symbols: | Ribosomal protein S10p/S20e family protein | chr3:4220310-4221526 REVERSE LENGTH=191;AT3G13120.1 | Symbols: | Ribosomal protein S10p/S20e family protein | chr3:4220310-4221526 REVERSE LENGTH=191
3	3	3	3	3	3	3	3	3		AT3G12780.1	AT3G12780.1	AT3G12780.1 | Symbols: PGK1 | phosphoglycerate kinase 1 | chr3:4061127-4063140 REVERSE LENGTH=481
3	3	3	3	3	3	3	3	3		AT3G12580.1	AT3G12580.1	AT3G12580.1 | Symbols: HSP70, ATHSP70 | heat shock protein 70 | chr3:3991487-3993689 REVERSE LENGTH=650
3	3	3	3	3	3	3	3	3		AT3G12345.1	AT3G12345.1	AT3G12345.1 | Symbols: | unknown protein;LOCATED IN: chloroplast;Has 35333 Blast hits to 34131 proteins in 2444 species: Archae - 798;Bacteria - 22429;Metazoa - 974;Fungi - 991;Plants - 531;Viruses - 0;Other Eukaryotes - 9610 (source: NCBI BLink).
3	3	3	3	3	3	3	3	3		AT3G12290.1	AT3G12290.1	AT3G12290.1 | Symbols: | Amino acid dehydrogenase family protein | chr3:3919591-3921326 FORWARD LENGTH=299
0	0	1	0	3	3	0	3	3		AT3G12280.2;AT3G12280.1	AT3G12280.2;AT3G12280.1	AT3G12280.2 | Symbols: RBR1 | retinoblastoma-related 1 | chr3:3913671-3918433 REVERSE LENGTH=1012;AT3G12280.1 | Symbols: RBR1, RBR, RB, ATRBR1, RB1 | retinoblastoma-related 1 | chr3:3913671-3918433 REVERSE LENGTH=1013
3	3	3	3	3	3	3	3	3		AT3G12110.1	AT3G12110.1	AT3G12110.1 | Symbols: ACT11 | actin-11 | chr3:3858116-3859609 FORWARD LENGTH=377
3	3	3	3	3	3	3	3	3		AT3G12080.1;AT3G12080.2	AT3G12080.1;AT3G12080.2	AT3G12080.1 | Symbols: emb2738 | GTP-binding family protein | chr3:3847851-3851980 FORWARD LENGTH=663;AT3G12080.2 | Symbols: emb2738 | GTP-binding family protein | chr3:3847851-3851677 FORWARD LENGTH=587
3	3	3	3	3	3	3	3	3		AT3G12050.1;AT3G12050.2	AT3G12050.1;AT3G12050.2	AT3G12050.1 | Symbols: | Aha1 domain-containing protein | chr3:3839289-3841303 FORWARD LENGTH=360;AT3G12050.2 | Symbols: | Aha1 domain-containing protein | chr3:3839289-3841303 FORWARD LENGTH=321
3	3	3	3	3	3	3	3	3		AT3G11964.1	AT3G11964.1	AT3G11964.1 | Symbols: | RNA binding;RNA binding | chr3:3793957-3806626 REVERSE LENGTH=1896
3	3	3	3	3	3	3	3	3		AT3G11940.2;AT3G11940.1	AT3G11940.2;AT3G11940.1	AT3G11940.2 | Symbols: ATRPS5A, AML1, RPS5A | ribosomal protein 5A | chr3:3778175-3779354 REVERSE LENGTH=207;AT3G11940.1 | Symbols: ATRPS5A, AML1, RPS5A | ribosomal protein 5A | chr3:3778175-3779354 REVERSE LENGTH=207
2	3	2	2	3	3	3	2	3		AT3G11930.1;AT3G11930.2;AT3G11930.4;AT3G11930.3	AT3G11930.1;AT3G11930.2;AT3G11930.4;AT3G11930.3	AT3G11930.1 | Symbols: | Adenine nucleotide alpha hydrolases-like superfamily protein | chr3:3776371-3777393 FORWARD LENGTH=199;AT3G11930.2 | Symbols: | Adenine nucleotide alpha hydrolases-like superfamily protein | chr3:3776371-3777393 FORWARD LENGTH=20
3	3	3	3	3	3	3	3	3		AT3G11910.2;AT3G11910.1	AT3G11910.2;AT3G11910.1	AT3G11910.2 | Symbols: UBP13 | ubiquitin-specific protease 13 | chr3:3761758-3770290 REVERSE LENGTH=1114;AT3G11910.1 | Symbols: UBP13 | ubiquitin-specific protease 13 | chr3:3761758-3770290 REVERSE LENGTH=1115
3	3	3	3	3	3	3	3	3		AT3G11830.1;AT3G11830.2	AT3G11830.1;AT3G11830.2	AT3G11830.1 | Symbols: | TCP-1/cpn60 chaperonin family protein | chr3:3732734-3736156 FORWARD LENGTH=557;AT3G11830.2 | Symbols: | TCP-1/cpn60 chaperonin family protein | chr3:3732734-3736156 FORWARD LENGTH=555
3	3	3	3	3	3	3	3	3		AT3G11710.1	AT3G11710.1	AT3G11710.1 | Symbols: ATKRS-1 | lysyl-tRNA synthetase 1 | chr3:3702359-3705613 REVERSE LENGTH=626
3	3	3	3	3	3	3	3	3		AT3G11630.1;AT5G06290.1	AT3G11630.1;AT5G06290.1	AT3G11630.1 | Symbols: | Thioredoxin superfamily protein | chr3:3672189-3673937 FORWARD LENGTH=266;AT5G06290.1 | Symbols: 2-Cys Prx B, 2CPB | 2-cysteine peroxiredoxin B | chr5:1919380-1921211 FORWARD LENGTH=273
3	3	3	3	3	3	3	3	3		AT3G11510.1	AT3G11510.1	AT3G11510.1 | Symbols: | Ribosomal protein S11 family protein | chr3:3623757-3624866 REVERSE LENGTH=150
3	3	3	2	3	3	3	2	3		AT3G11450.1	AT3G11450.1	AT3G11450.1 | Symbols: | DnaJ domain;Myb-like DNA-binding domain | chr3:3605459-3607402 REVERSE LENGTH=647
3	3	3	3	3	3	3	3	3		AT3G11400.1;AT3G11400.2	AT3G11400.1;AT3G11400.2;AT5G06000.1	AT3G11400.1 | Symbols: EIF3G1, ATEIF3G1 | eukaryotic translation initiation factor 3G1 | chr3:3578536-3580366 FORWARD LENGTH=294;AT3G11400.2 | Symbols: EIF3G1, ATEIF3G1 | eukaryotic translation initiation factor 3G1 | chr3:3578536-3580366 FORWARD LENGTH=32
3	3	3	3	3	3	3	3	3		AT3G11200.1	AT3G11200.1	AT3G11200.1 | Symbols: AL2 | alfin-like 2 | chr3:3508387-3510418 REVERSE LENGTH=246
3	3	3	3	3	3	3	3	3		AT3G11130.1	AT3G11130.1	AT3G11130.1 | Symbols: | Clathrin, heavy chain | chr3:3482575-3491667 REVERSE LENGTH=1705
3	3	3	3	3	3	3	3	3		AT3G10920.2;AT3G10920.1	AT3G10920.2;AT3G10920.1	AT3G10920.2 | Symbols: MSD1 | manganese superoxide dismutase 1 | chr3:3418015-3419581 FORWARD LENGTH=230;AT3G10920.1 | Symbols: MSD1, MEE33, ATMSD1 | manganese superoxide dismutase 1 | chr3:3418015-3419581 FORWARD LENGTH=231
3	3	3	3	3	3	3	3	2		AT3G10740.1	AT3G10740.1	AT3G10740.1 | Symbols: ASD1, ARAF1, ARAF, ATASD1 | alpha-L-arabinofuranosidase 1 | chr3:3361031-3364573 REVERSE LENGTH=678
3	3	3	3	3	3	3	3	3		AT3G10690.1	AT3G10690.1	AT3G10690.1 | Symbols: GYRA | DNA GYRASE A | chr3:3339612-3346243 REVERSE LENGTH=950
2	2	1	2	3	3	3	3	3		AT3G10650.1	AT3G10650.1	AT3G10650.1 | Symbols: | BEST Arabidopsis thaliana protein match is: nucleoporin-related (TAIR:AT5G20200.1);Has 61042 Blast hits to 31782 proteins in 2093 species: Archae - 202;Bacteria - 16480;Metazoa - 16017;Fungi - 12552;Plants - 1653;Viruses - 6
3	3	3	3	3	3	3	3	3		AT3G10610.1;AT2G05220.2;AT2G05220.1;AT5G04800.4;AT5G04800.3;AT5G04800.2;AT5G04800.1;AT2G04390.1	AT3G10610.1;AT2G05220.2;AT2G05220.1;AT5G04800.4;AT5G04800.3;AT5G04800.2;AT5G04800.1;AT2G04390.1	AT3G10610.1 | Symbols: | Ribosomal S17 family protein | chr3:3319459-3319881 FORWARD LENGTH=140;AT2G05220.2 | Symbols: | Ribosomal S17 family protein | chr2:1894757-1895179 REVERSE LENGTH=140;AT2G05220.1 | Symbols: | Ribosomal S17 family protein | chr2:
3	3	3	3	3	3	3	3	3		AT3G10420.2;AT3G10420.1	AT3G10420.2;AT3G10420.1	AT3G10420.2 | Symbols: SPD1 | P-loop containing nucleoside triphosphate hydrolases superfamily protein | chr3:3239307-3242274 FORWARD LENGTH=684;AT3G10420.1 | Symbols: SPD1 | P-loop containing nucleoside triphosphate hydrolases superfamily protein | chr3:3
3	2	3	3	3	3	3	3	3		AT3G10410.1	AT3G10410.1	AT3G10410.1 | Symbols: SCPL49, CPY | SERINE CARBOXYPEPTIDASE-LIKE 49 | chr3:3235518-3238063 REVERSE LENGTH=516
3	3	3	3	3	3	3	3	3		AT3G10380.1	AT3G10380.1	AT3G10380.1 | Symbols: SEC8, ATSEC8 | subunit of exocyst complex 8 | chr3:3219922-3228356 REVERSE LENGTH=1053
3	3	3	3	3	3	3	3	3		AT3G10350.1;AT3G10350.2	AT3G10350.1;AT3G10350.2	AT3G10350.1 | Symbols: | P-loop containing nucleoside triphosphate hydrolases superfamily protein | chr3:3208310-3210678 FORWARD LENGTH=411;AT3G10350.2 | Symbols: | P-loop containing nucleoside triphosphate hydrolases superfamily protein | chr3:3208310-3
3	3	3	3	3	3	3	3	3		AT3G10270.1	AT3G10270.1	AT3G10270.1 | Symbols: GYRB1 | DNA GYRASE B1 | chr3:3173805-3179756 REVERSE LENGTH=772
2	3	3	3	3	3	3	3	3		AT3G10160.1	AT3G10160.1	AT3G10160.1 | Symbols: ATDFC, DFC, FPGS2 | DHFS-FPGS homolog C | chr3:3139588-3143949 REVERSE LENGTH=625
3	3	3	3	3	3	3	3	3		AT3G09925.1	AT3G09925.1	AT3G09925.1 | Symbols: | Pollen Ole e 1 allergen and extensin family protein | chr3:3051868-3052784 REVERSE LENGTH=171
3	3	3	3	3	3	3	3	3		AT3G09840.1;AT5G03340.1;AT3G53230.1	AT3G09840.1;AT5G03340.1;AT3G53230.1	AT3G09840.1 | Symbols: CDC48, ATCDC48, CDC48A | cell division cycle 48 | chr3:3019494-3022832 FORWARD LENGTH=809;AT5G03340.1 | Symbols: | ATPase, AAA-type, CDC48 protein | chr5:810091-813133 REVERSE LENGTH=810;AT3G53230.1 | Symbols: | ATPase, AAA-type, C
3	3	3	3	3	3	3	3	3		AT3G09820.1;AT3G09820.2	AT3G09820.1;AT3G09820.2	AT3G09820.1 | Symbols: ADK1, ATADK1 | adenosine kinase 1 | chr3:3012122-3014624 FORWARD LENGTH=344;AT3G09820.2 | Symbols: ADK1 | adenosine kinase 1 | chr3:3012645-3014624 FORWARD LENGTH=302
3	3	2	2	3	3	3	3	3		AT3G09740.1	AT3G09740.1	AT3G09740.1 | Symbols: SYP71, ATSYP71 | syntaxin of plants 71 | chr3:2989615-2991354 FORWARD LENGTH=266
3	3	3	3	3	3	3	3	3		AT3G09630.1;AT3G09630.2	AT3G09630.1;AT3G09630.2	AT3G09630.1 | Symbols: | Ribosomal protein L4/L1 family | chr3:2953813-2955444 FORWARD LENGTH=406;AT3G09630.2 | Symbols: | Ribosomal protein L4/L1 family | chr3:2953813-2955444 FORWARD LENGTH=405
3	3	3	3	3	3	3	3	3		AT3G09500.1	AT3G09500.1;AT3G55170.2;AT3G55170.1	AT3G09500.1 | Symbols: | Ribosomal L29 family protein | chr3:2917047-2917895 FORWARD LENGTH=123
3	3	3	3	3	3	3	3	3		AT3G09440.2;AT3G09440.1	AT3G09440.2;AT3G09440.1	AT3G09440.2 | Symbols: | Heat shock protein 70 (Hsp 70) family protein | chr3:2903434-2905632 REVERSE LENGTH=649;AT3G09440.1 | Symbols: | Heat shock protein 70 (Hsp 70) family protein | chr3:2903434-2905632 REVERSE LENGTH=649
3	3	3	3	3	3	3	3	3		AT3G09260.1	AT3G09260.1	AT3G09260.1 | Symbols: PYK10, PSR3.1, BGLU23, LEB | Glycosyl hydrolase superfamily protein | chr3:2840657-2843730 REVERSE LENGTH=524
3	3	3	3	3	3	3	3	3		AT3G09200.1;AT3G11250.1;AT3G09200.2;AT2G40010.1	AT3G09200.1;AT3G11250.1;AT3G09200.2;AT2G40010.1	AT3G09200.1 | Symbols: | Ribosomal protein L10 family protein | chr3:2823364-2825020 REVERSE LENGTH=320;AT3G11250.1 | Symbols: | Ribosomal protein L10 family protein | chr3:3521453-3522826 FORWARD LENGTH=323;AT3G09200.2 | Symbols: | Ribosomal protein L1
3	3	3	3	3	3	3	3	3		AT3G08943.1;AT3G08947.1	AT3G08943.1;AT3G08947.1	AT3G08943.1 | Symbols: | ARM repeat superfamily protein | chr3:2719198-2721911 REVERSE LENGTH=871;AT3G08947.1 | Symbols: | ARM repeat superfamily protein | chr3:2724007-2726722 FORWARD LENGTH=873
3	3	3	3	3	3	3	3	3		AT3G08940.2;AT3G08940.1	AT3G08940.2;AT3G08940.1	AT3G08940.2 | Symbols: LHCB4.2 | light harvesting complex photosystem II | chr3:2717717-2718665 FORWARD LENGTH=287;AT3G08940.1 | Symbols: LHCB4.2 | light harvesting complex photosystem II | chr3:2717717-2718400 FORWARD LENGTH=227
3	3	3	3	3	3	3	3	3		AT3G08900.1	AT3G08900.1	AT3G08900.1 | Symbols: RGP3, RGP | reversibly glycosylated polypeptide 3 | chr3:2708347-2709714 REVERSE LENGTH=362
3	3	3	3	3	3	3	3	3		AT3G08740.1	AT3G08740.1	AT3G08740.1 | Symbols: | elongation factor P (EF-P) family protein | chr3:2654788-2656154 REVERSE LENGTH=236
3	3	3	3	3	3	3	3	3		AT3G08590.2;AT3G08590.1	AT3G08590.2;AT3G08590.1	AT3G08590.2 | Symbols: | Phosphoglycerate mutase, 2,3-bisphosphoglycerate-independent | chr3:2608683-2611237 REVERSE LENGTH=560;AT3G08590.1 | Symbols: | Phosphoglycerate mutase, 2,3-bisphosphoglycerate-independent | chr3:2608683-2611237 REVERSE LENGTH=56
3	3	3	3	3	3	3	3	3		AT3G08580.2;AT3G08580.1	AT3G08580.2;AT3G08580.1	AT3G08580.2 | Symbols: AAC1 | ADP/ATP carrier 1 | chr3:2605706-2607030 REVERSE LENGTH=381;AT3G08580.1 | Symbols: AAC1 | ADP/ATP carrier 1 | chr3:2605706-2607030 REVERSE LENGTH=381
3	3	3	3	3	3	3	3	3		AT3G08530.1	AT3G08530.1;REV__AT1G69270.1	AT3G08530.1 | Symbols: | Clathrin, heavy chain | chr3:2587171-2595411 REVERSE LENGTH=1703
3	3	3	3	3	3	3	3	3		AT3G08510.3;AT3G08510.2;AT3G08510.1	AT3G08510.3;AT3G08510.2;AT3G08510.1;AT3G55940.1	AT3G08510.3 | Symbols: | phospholipase C 2 | chr3:2582626-2585556 REVERSE LENGTH=552;AT3G08510.2 | Symbols: ATPLC2, PLC2 | phospholipase C 2 | chr3:2582626-2585556 REVERSE LENGTH=581;AT3G08510.1 | Symbols: ATPLC2, PLC2 | phospholipase C 2 | chr3:2582626-2
3	3	3	3	3	3	3	3	3		AT3G08030.1;AT3G08030.2	AT3G08030.1;AT3G08030.2	AT3G08030.1 | Symbols: | Protein of unknown function, DUF642 | chr3:2564191-2565819 FORWARD LENGTH=365;AT3G08030.2 | Symbols: | Protein of unknown function, DUF642 | chr3:2564517-2565819 FORWARD LENGTH=323
3	3	3	3	3	3	3	3	3		AT3G07810.1;AT3G07810.2	AT3G07810.1;AT3G07810.2	AT3G07810.1 | Symbols: | RNA-binding (RRM/RBD/RNP motifs) family protein | chr3:2492875-2495052 FORWARD LENGTH=494;AT3G07810.2 | Symbols: | RNA-binding (RRM/RBD/RNP motifs) family protein | chr3:2492875-2495102 FORWARD LENGTH=495
0	0	0	1	3	3	0	3	3		AT3G07790.1	AT3G07790.1	AT3G07790.1 | Symbols: | DGCR14-related | chr3:2487491-2489017 FORWARD LENGTH=508
3	3	3	3	3	3	3	3	3		AT3G07770.1	AT3G07770.1	AT3G07770.1 | Symbols: Hsp89.1, AtHsp90.6, AtHsp90-6 | HEAT SHOCK PROTEIN 89.1 | chr3:2479611-2483970 FORWARD LENGTH=799
3	3	3	3	3	3	3	3	3		AT3G07680.1	AT3G07680.1	AT3G07680.1 | Symbols: | emp24/gp25L/p24 family/GOLD family protein | chr3:2455627-2456652 FORWARD LENGTH=208
3	3	3	3	3	3	2	3	3		AT3G07630.2;AT3G07630.1	AT3G07630.2;AT3G07630.1	AT3G07630.2 | Symbols: ADT2 | arogenate dehydratase 2 | chr3:2435457-2437530 FORWARD LENGTH=381;AT3G07630.1 | Symbols: ADT2 | arogenate dehydratase 2 | chr3:2435457-2437530 FORWARD LENGTH=381
3	3	3	2	3	3	3	3	3		AT3G07480.1	AT3G07480.1	AT3G07480.1 | Symbols: | 2Fe-2S ferredoxin-like superfamily protein | chr3:2389026-2389505 FORWARD LENGTH=159
3	3	3	3	3	3	3	3	3		AT3G07320.1	AT3G07320.1	AT3G07320.1 | Symbols: | O-Glycosyl hydrolases family 17 protein | chr3:2332324-2333925 REVERSE LENGTH=460
3	3	3	3	3	3	3	3	3		AT3G07300.2;AT3G07300.1;AT3G07300.3	AT3G07300.2;AT3G07300.1;AT3G07300.3	AT3G07300.2 | Symbols: | NagB/RpiA/CoA transferase-like superfamily protein | chr3:2324967-2327380 REVERSE LENGTH=407;AT3G07300.1 | Symbols: | NagB/RpiA/CoA transferase-like superfamily protein | chr3:2324967-2327380 REVERSE LENGTH=407;AT3G07300.3 | Symb
3	3	3	3	3	3	3	3	3		AT3G07220.1	AT3G07220.1;AT3G07260.1	AT3G07220.1 | Symbols: | SMAD/FHA domain-containing protein | chr3:2297968-2299407 FORWARD LENGTH=320
3	3	3	3	3	3	3	3	3		AT3G07160.1	AT3G07160.1	AT3G07160.1 | Symbols: ATGSL10, gsl10, CALS9 | glucan synthase-like 10 | chr3:2265142-2279383 REVERSE LENGTH=1890
3	3	3	3	3	3	3	3	3		AT3G07110.1;AT3G07110.2	AT3G07110.1;AT3G07110.2	AT3G07110.1 | Symbols: | Ribosomal protein L13 family protein | chr3:2252092-2253332 FORWARD LENGTH=206;AT3G07110.2 | Symbols: | Ribosomal protein L13 family protein | chr3:2252092-2253332 FORWARD LENGTH=207
3	3	3	3	3	3	3	3	3		AT3G07100.1	AT3G07100.1	AT3G07100.1 | Symbols: ERMO2, SEC24A | Sec23/Sec24 protein transport family protein | chr3:2245689-2250077 REVERSE LENGTH=1038
3	3	3	3	3	3	3	3	3		AT3G07050.1	AT3G07050.1	AT3G07050.1 | Symbols: | GTP-binding family protein | chr3:2229602-2232279 REVERSE LENGTH=582
3	3	3	3	3	3	3	3	3		AT3G07030.1	AT3G07030.1	AT3G07030.1 | Symbols: | Alba DNA/RNA-binding protein | chr3:2223001-2225254 REVERSE LENGTH=405
3	3	3	3	3	3	3	3	3		AT3G07010.1	AT3G07010.1;AT3G24230.1	AT3G07010.1 | Symbols: | Pectin lyase-like superfamily protein | chr3:2212973-2216306 REVERSE LENGTH=416
3	3	3	3	3	3	3	3	3		AT3G06980.1	AT3G06980.1	AT3G06980.1 | Symbols: | DEA(D/H)-box RNA helicase family protein | chr3:2201531-2204662 FORWARD LENGTH=781
3	3	3	3	3	3	3	3	3		AT3G06860.1	AT3G06860.1	AT3G06860.1 | Symbols: MFP2, ATMFP2 | multifunctional protein 2 | chr3:2161926-2166009 FORWARD LENGTH=725
3	3	3	3	3	3	3	3	3		AT3G06850.2;AT3G06850.1	AT3G06850.2;AT3G06850.1	AT3G06850.2 | Symbols: BCE2, LTA1, DIN3 | 2-oxoacid dehydrogenases acyltransferase family protein | chr3:2158212-2160465 REVERSE LENGTH=483;AT3G06850.1 | Symbols: BCE2, LTA1, DIN3 | 2-oxoacid dehydrogenases acyltransferase family protein | chr3:2158212-216
3	3	3	3	3	3	3	3	3		AT3G06810.1	AT3G06810.1	AT3G06810.1 | Symbols: IBR3 | acyl-CoA dehydrogenase-related | chr3:2146534-2150654 FORWARD LENGTH=824
3	3	3	3	3	3	3	3	3		AT3G06650.1	AT3G06650.1	AT3G06650.1 | Symbols: ACLB-1 | ATP-citrate lyase B-1 | chr3:2079247-2082633 REVERSE LENGTH=608
3	3	3	3	3	3	3	3	3		AT3G06580.1	AT3G06580.1	AT3G06580.1 | Symbols: GAL1, GALK | Mevalonate/galactokinase family protein | chr3:2049141-2051867 REVERSE LENGTH=496
3	3	3	3	3	3	3	3	3		AT3G06530.2;AT3G06530.3;AT3G06530.1	AT3G06530.2;AT3G06530.3;AT3G06530.1	AT3G06530.2 | Symbols: | ARM repeat superfamily protein | chr3:2022596-2033637 FORWARD LENGTH=2199;AT3G06530.3 | Symbols: | ARM repeat superfamily protein | chr3:2022596-2033637 FORWARD LENGTH=2188;AT3G06530.1 | Symbols: | ARM repeat superfamily protein
2	3	3	2	3	3	3	3	2		AT3G06483.1	AT3G06483.1	AT3G06483.1 | Symbols: PDK, ATPDHK | pyruvate dehydrogenase kinase | chr3:1990727-1992581 REVERSE LENGTH=366
3	3	3	3	3	3	3	3	3		AT3G06480.1	AT3G06480.1	AT3G06480.1 | Symbols: | DEAD box RNA helicase family protein | chr3:1985697-1989666 REVERSE LENGTH=1088
3	3	3	3	3	3	3	3	3		AT3G06400.1;AT3G06400.3;AT3G06400.2	AT3G06400.1;AT3G06400.3;AT3G06400.2	AT3G06400.1 | Symbols: CHR11 | chromatin-remodeling protein 11 | chr3:1941066-1946700 FORWARD LENGTH=1055;AT3G06400.3 | Symbols: CHR11 | chromatin-remodeling protein 11 | chr3:1941066-1946700 FORWARD LENGTH=1057;AT3G06400.2 | Symbols: CHR11 | chromatin-rem
3	3	3	2	3	3	3	3	3		AT3G06350.1	AT3G06350.1	AT3G06350.1 | Symbols: EMB3004, MEE32 | dehydroquinate dehydratase, putative / shikimate dehydrogenase, putative | chr3:1924536-1927701 REVERSE LENGTH=603
3	3	3	3	3	3	2	3	3		AT3G06050.1	AT3G06050.1	AT3G06050.1 | Symbols: PRXIIF, ATPRXIIF | peroxiredoxin IIF | chr3:1826311-1827809 REVERSE LENGTH=201
2	3	3	3	3	3	3	3	3		AT3G06010.1	AT3G06010.1	AT3G06010.1 | Symbols: ATCHR12 | Homeotic gene regulator | chr3:1802435-1807284 REVERSE LENGTH=1102
2	3	3	3	3	3	3	3	3		AT3G05730.1	AT3G05730.1	AT3G05730.1 | Symbols: | Encodes a defensin-like (DEFL) family protein. | chr3:1696070-1696490 FORWARD LENGTH=86
1	2	3	3	3	3	3	3	3		AT3G05680.1;AT3G05680.2	AT3G05680.1;AT3G05680.2	AT3G05680.1 | Symbols: EMB2016 | embryo defective 2016 | chr3:1660802-1672015 REVERSE LENGTH=2138;AT3G05680.2 | Symbols: EMB2016 | embryo defective 2016 | chr3:1660802-1672015 REVERSE LENGTH=2152
3	3	3	3	3	3	3	3	3		AT3G05590.1	AT3G05590.1;AT2G47570.2;AT2G47570.1	AT3G05590.1 | Symbols: RPL18 | ribosomal protein L18 | chr3:1621511-1622775 FORWARD LENGTH=187
3	3	3	3	3	3	3	3	3		AT3G05560.3;AT3G05560.2;AT3G05560.1	AT3G05560.3;AT3G05560.2;AT3G05560.1	AT3G05560.3 | Symbols: | Ribosomal L22e protein family | chr3:1614641-1615204 FORWARD LENGTH=124;AT3G05560.2 | Symbols: | Ribosomal L22e protein family | chr3:1614641-1615204 FORWARD LENGTH=124;AT3G05560.1 | Symbols: | Ribosomal L22e protein family | ch
3	3	3	3	3	3	3	3	3		AT3G05530.1;AT1G09100.1	AT3G05530.1;AT1G09100.1	AT3G05530.1 | Symbols: RPT5A, ATS6A.2 | regulatory particle triple-A ATPase 5A | chr3:1603540-1605993 FORWARD LENGTH=424;AT1G09100.1 | Symbols: RPT5B | 26S proteasome AAA-ATPase subunit RPT5B | chr1:2936675-2939258 REVERSE LENGTH=423
1	2	3	3	3	3	3	3	3		AT3G05420.1;AT3G05420.2	AT3G05420.1;AT3G05420.2	AT3G05420.1 | Symbols: ACBP4 | acyl-CoA binding protein 4 | chr3:1561880-1567047 FORWARD LENGTH=668;AT3G05420.2 | Symbols: ACBP4 | acyl-CoA binding protein 4 | chr3:1561880-1567047 FORWARD LENGTH=669
3	3	2	3	3	3	3	3	3		AT3G05260.1	AT3G05260.1	AT3G05260.1 | Symbols: | NAD(P)-binding Rossmann-fold superfamily protein | chr3:1497665-1498919 REVERSE LENGTH=289
3	3	3	3	3	3	3	3	3		AT3G05220.1;AT3G05220.2	AT3G05220.1;AT3G05220.2	AT3G05220.1 | Symbols: | Heavy metal transport/detoxification superfamily protein | chr3:1488808-1491171 FORWARD LENGTH=577;AT3G05220.2 | Symbols: | Heavy metal transport/detoxification superfamily protein | chr3:1489735-1491171 FORWARD LENGTH=478
3	3	3	3	3	3	3	3	3		AT3G05060.1	AT3G05060.1	AT3G05060.1 | Symbols: | NOP56-like pre RNA processing ribonucleoprotein | chr3:1413174-1415564 REVERSE LENGTH=533
0	1	0	0	0	2	1	3	3		AT3G04930.2;AT3G04930.1	AT3G04930.2;AT3G04930.1	AT3G04930.2 | Symbols: | DNA-binding storekeeper protein-related transcriptional regulator | chr3:1363029-1364651 FORWARD LENGTH=396;AT3G04930.1 | Symbols: | DNA-binding storekeeper protein-related transcriptional regulator | chr3:1363029-1364399 FORWARD
3	3	3	3	3	3	3	3	3		AT3G04920.1	AT3G04920.1	AT3G04920.1 | Symbols: | Ribosomal protein S24e family protein | chr3:1360989-1362065 FORWARD LENGTH=133
3	3	3	3	3	3	3	2	3		AT3G04870.2;AT3G04870.1	AT3G04870.2;AT3G04870.1	AT3G04870.2 | Symbols: ZDS, PDE181, SPC1 | zeta-carotene desaturase | chr3:1342842-1346189 FORWARD LENGTH=558;AT3G04870.1 | Symbols: ZDS, PDE181, SPC1 | zeta-carotene desaturase | chr3:1342842-1346189 FORWARD LENGTH=558
3	3	3	3	3	3	3	3	3		AT3G04840.1	AT3G04840.1	AT3G04840.1 | Symbols: | Ribosomal protein S3Ae | chr3:1329751-1331418 FORWARD LENGTH=262
3	3	3	3	3	3	3	3	3		AT3G04790.1	AT3G04790.1	AT3G04790.1 | Symbols: | Ribose 5-phosphate isomerase, type A protein | chr3:1313365-1314195 FORWARD LENGTH=276
3	3	3	3	3	3	3	3	3		AT3G04760.1	AT3G04760.1	AT3G04760.1 | Symbols: | Pentatricopeptide repeat (PPR-like) superfamily protein | chr3:1303884-1305692 REVERSE LENGTH=602
1	3	3	3	3	3	3	3	3		AT3G04740.1	AT3G04740.1	AT3G04740.1 | Symbols: SWP, MED14, ATMED14 | RNA polymerase II transcription mediators | chr3:1294037-1300555 FORWARD LENGTH=1703
3	3	3	3	3	3	3	3	3		AT3G04650.1	AT3G04650.1	AT3G04650.1 | Symbols: | FAD/NAD(P)-binding oxidoreductase family protein | chr3:1262017-1264343 FORWARD LENGTH=486
3	3	3	3	3	3	3	3	3		AT3G04600.3;AT3G04600.1;AT3G04600.2	AT3G04600.3;AT3G04600.1;AT3G04600.2	AT3G04600.3 | Symbols: | Nucleotidylyl transferase superfamily protein | chr3:1243152-1245958 FORWARD LENGTH=402;AT3G04600.1 | Symbols: | Nucleotidylyl transferase superfamily protein | chr3:1243152-1245958 FORWARD LENGTH=402;AT3G04600.2 | Symbols: | Nu
3	3	3	3	3	3	3	3	3		AT3G04590.2;AT3G04590.1	AT3G04590.2;AT3G04590.1	AT3G04590.2 | Symbols: | AT hook motif DNA-binding family protein | chr3:1239245-1241603 REVERSE LENGTH=411;AT3G04590.1 | Symbols: | AT hook motif DNA-binding family protein | chr3:1239213-1241603 REVERSE LENGTH=309
3	3	3	3	3	3	3	3	3		AT3G04490.1	AT3G04490.1;AT4G38092.1	AT3G04490.1 | Symbols: | unknown protein;BEST Arabidopsis thaliana protein match is: unknown protein (TAIR:AT4G38092.1);Has 75 Blast hits to 64 proteins in 20 species: Archae - 0;Bacteria - 0;Metazoa - 36;Fungi - 0;Plants - 22;Viruses - 0;Other Eu
3	3	3	3	3	3	3	3	3		AT3G04400.2;AT3G04400.1;AT2G33370.1;AT1G04480.1	AT3G04400.2;AT3G04400.1;AT2G33370.1;AT1G04480.1	AT3G04400.2 | Symbols: emb2171 | Ribosomal protein L14p/L23e family protein | chr3:1167611-1168308 FORWARD LENGTH=125;AT3G04400.1 | Symbols: emb2171 | Ribosomal protein L14p/L23e family protein | chr3:1167339-1168308 FORWARD LENGTH=140;AT2G33370.1 | Symbol
3	3	3	3	3	3	3	3	3		AT3G04340.1	AT3G04340.1	AT3G04340.1 | Symbols: emb2458 | FtsH extracellular protease family | chr3:1146943-1153341 REVERSE LENGTH=1320
3	3	3	3	3	3	3	3	3		AT3G04260.1	AT3G04260.1	AT3G04260.1 | Symbols: PTAC3 | plastid transcriptionally active 3 | chr3:1123231-1127515 REVERSE LENGTH=910
3	3	3	3	3	3	3	3	3		AT3G04120.1	AT3G04120.1	AT3G04120.1 | Symbols: GAPC, GAPC-1, GAPC1 | glyceraldehyde-3-phosphate dehydrogenase C subunit 1 | chr3:1081077-1083131 FORWARD LENGTH=338
3	3	3	3	3	3	3	3	3		AT3G03960.1	AT3G03960.1	AT3G03960.1 | Symbols: | TCP-1/cpn60 chaperonin family protein | chr3:1024432-1027604 FORWARD LENGTH=549
1	3	2	3	3	3	3	3	3		AT3G03950.2;AT3G03950.1;AT3G03950.3	AT3G03950.2;AT3G03950.1;AT3G03950.3	AT3G03950.2 | Symbols: ECT1 | evolutionarily conserved C-terminal region 1 | chr3:1021502-1023767 FORWARD LENGTH=424;AT3G03950.1 | Symbols: ECT1 | evolutionarily conserved C-terminal region 1 | chr3:1021502-1023767 FORWARD LENGTH=425;AT3G03950.3 | Symbols:
3	3	3	3	3	3	3	3	3		AT3G03940.1	AT3G03940.1	AT3G03940.1 | Symbols: | Protein kinase family protein | chr3:1014412-1018244 REVERSE LENGTH=701
3	3	3	3	3	3	3	3	3		AT3G03920.1	AT3G03920.1	AT3G03920.1 | Symbols: | H/ACA ribonucleoprotein complex, subunit Gar1/Naf1 protein | chr3:1009123-1010379 REVERSE LENGTH=202
3	3	3	3	3	3	3	3	3		AT3G03780.3;AT3G03780.2;AT3G03780.1	AT3G03780.3;AT3G03780.2;AT3G03780.1	AT3G03780.3 | Symbols: ATMS2, MS2 | methionine synthase 2 | chr3:957602-960740 FORWARD LENGTH=765;AT3G03780.2 | Symbols: ATMS2, MS2 | methionine synthase 2 | chr3:957602-960740 FORWARD LENGTH=765;AT3G03780.1 | Symbols: ATMS2, MS2 | methionine synthase 2 |
3	3	3	3	3	3	3	3	3		AT3G03710.1	AT3G03710.1	AT3G03710.1 | Symbols: RIF10, PNP | polyribonucleotide nucleotidyltransferase, putative | chr3:919542-924906 FORWARD LENGTH=922
3	3	3	3	3	3	3	3	3		AT3G03380.1	AT3G03380.1;AT3G03370.1;AT3G03370.2	AT3G03380.1 | Symbols: DegP7 | DegP protease 7 | chr3:799720-808319 FORWARD LENGTH=1097
3	3	3	3	3	3	3	3	3		AT3G03250.1	AT3G03250.1	AT3G03250.1 | Symbols: UGP, UGP1, AtUGP1 | UDP-GLUCOSE PYROPHOSPHORYLASE 1 | chr3:749761-754014 REVERSE LENGTH=469
0	0	1	3	3	3	3	3	3		AT3G03140.1	AT3G03140.1	AT3G03140.1 | Symbols: | Tudor/PWWP/MBT superfamily protein | chr3:724348-727093 FORWARD LENGTH=769
3	3	3	3	3	3	3	3	3		AT3G02880.1	AT3G02880.1	AT3G02880.1 | Symbols: | Leucine-rich repeat protein kinase family protein | chr3:634819-636982 FORWARD LENGTH=627
3	3	3	3	3	3	3	3	3		AT3G02830.1	AT3G02830.1;AT5G16540.3;AT5G16540.2;AT5G16540.1	AT3G02830.1 | Symbols: ZFN1 | zinc finger protein 1 | chr3:614075-615916 FORWARD LENGTH=397
3	3	3	3	3	3	3	3	3		AT3G02780.1	AT3G02780.1	AT3G02780.1 | Symbols: IPP2, IPIAT1, IDI2 | isopentenyl pyrophosphate:dimethylallyl pyrophosphate isomerase 2 | chr3:602578-604648 REVERSE LENGTH=284
3	3	3	3	3	3	3	3	3		AT3G02760.1	AT3G02760.1	AT3G02760.1 | Symbols: | Class II aaRS and biotin synthetases superfamily protein | chr3:597588-600650 REVERSE LENGTH=883
1	3	3	2	3	3	2	3	3		AT3G02650.1	AT3G02650.1	AT3G02650.1 | Symbols: | Tetratricopeptide repeat (TPR)-like superfamily protein | chr3:568135-569865 FORWARD LENGTH=576
3	3	3	3	3	3	3	3	3		AT3G02560.2;AT3G02560.1	AT3G02560.2;AT3G02560.1	AT3G02560.2 | Symbols: | Ribosomal protein S7e family protein | chr3:542341-543168 FORWARD LENGTH=191;AT3G02560.1 | Symbols: | Ribosomal protein S7e family protein | chr3:542341-543168 FORWARD LENGTH=191
3	3	3	3	3	3	3	3	3		AT3G02530.1	AT3G02530.1	AT3G02530.1 | Symbols: | TCP-1/cpn60 chaperonin family protein | chr3:528806-532457 REVERSE LENGTH=535
3	3	3	3	3	3	3	3	3		AT3G02360.2;AT3G02360.1	AT3G02360.2;AT3G02360.1	AT3G02360.2 | Symbols: | 6-phosphogluconate dehydrogenase family protein | chr3:482498-483958 FORWARD LENGTH=486;AT3G02360.1 | Symbols: | 6-phosphogluconate dehydrogenase family protein | chr3:482498-483958 FORWARD LENGTH=486
3	3	3	3	3	3	3	3	3		AT3G02320.1	AT3G02320.1	AT3G02320.1 | Symbols: | N2,N2-dimethylguanosine tRNA methyltransferase | chr3:470097-473492 FORWARD LENGTH=589
3	3	3	3	3	3	3	3	3		AT3G02260.1	AT3G02260.1	AT3G02260.1 | Symbols: BIG, DOC1, TIR3, UMB1, ASA1, LPR1, CRM1 | auxin transport protein (BIG) | chr3:431152-448489 REVERSE LENGTH=5098
3	3	3	3	3	3	3	3	3		AT3G02230.1	AT3G02230.1;AT5G50750.1	AT3G02230.1 | Symbols: RGP1, ATRGP1 | reversibly glycosylated polypeptide 1 | chr3:415463-417304 FORWARD LENGTH=357
3	3	3	3	3	3	3	2	3		AT3G02170.1	AT3G02170.1	AT3G02170.1 | Symbols: LNG2 | longifolia2 | chr3:396208-399393 REVERSE LENGTH=905
3	3	3	3	3	3	3	3	3		AT3G02090.1;AT3G02090.2	AT3G02090.1;AT3G02090.2	AT3G02090.1 | Symbols: MPPBETA | Insulinase (Peptidase family M16) protein | chr3:365624-368526 FORWARD LENGTH=531;AT3G02090.2 | Symbols: MPPBETA | Insulinase (Peptidase family M16) protein | chr3:365624-368534 FORWARD LENGTH=535
3	3	3	3	3	3	3	3	3		AT3G02080.1	AT3G02080.1	AT3G02080.1 | Symbols: | Ribosomal protein S19e family protein | chr3:364138-365161 REVERSE LENGTH=143
3	3	3	3	3	3	3	3	3		AT3G01910.2;AT3G01910.1	AT3G01910.2;AT3G01910.1;AT3G01910.3	AT3G01910.2 | Symbols: SOX, AT-SO, AtSO | sulfite oxidase | chr3:314919-316641 REVERSE LENGTH=298;AT3G01910.1 | Symbols: SOX, AT-SO, AtSO | sulfite oxidase | chr3:314919-317274 REVERSE LENGTH=393
3	3	3	3	3	3	3	3	3		AT3G01780.1	AT3G01780.1	AT3G01780.1 | Symbols: TPLATE | ARM repeat superfamily protein | chr3:279171-283399 FORWARD LENGTH=1176
3	3	3	3	3	3	3	3	3		AT3G01570.1	AT3G01570.1	AT3G01570.1 | Symbols: | Oleosin family protein | chr3:222152-222778 REVERSE LENGTH=183
3	3	3	3	3	3	3	3	3		AT3G01540.1;AT3G01540.4;AT3G01540.3;AT3G01540.2	AT3G01540.1;AT3G01540.4;AT3G01540.3;AT3G01540.2	AT3G01540.1 | Symbols: DRH1, ATDRH1 | DEAD box RNA helicase 1 | chr3:213077-216142 REVERSE LENGTH=618;AT3G01540.4 | Symbols: DRH1, ATDRH1 | DEAD box RNA helicase 1 | chr3:213077-216142 REVERSE LENGTH=619;AT3G01540.3 | Symbols: DRH1, ATDRH1 | DEAD box RNA h
3	3	3	3	3	3	3	3	3		AT3G01510.1	AT3G01510.1	AT3G01510.1 | Symbols: LSF1 | like SEX4 1 | chr3:198855-201682 REVERSE LENGTH=591
3	3	3	3	3	3	3	3	3		AT3G01500.1;AT3G01500.3;AT3G01500.2	AT3G01500.1;AT3G01500.3;AT3G01500.2	AT3G01500.1 | Symbols: CA1, ATBCA1, SABP3, ATSABP3 | carbonic anhydrase 1 | chr3:194853-196716 REVERSE LENGTH=270;AT3G01500.3 | Symbols: CA1 | carbonic anhydrase 1 | chr3:195173-197873 REVERSE LENGTH=336;AT3G01500.2 | Symbols: CA1 | carbonic anhydrase 1 |
1	2	1	1	3	3	3	3	3		AT3G01460.1	AT3G01460.1	AT3G01460.1 | Symbols: MBD9, ATMBD9 | methyl-CPG-binding domain 9 | chr3:173316-182038 FORWARD LENGTH=2176
3	3	3	3	3	3	3	2	3		AT3G01420.1	AT3G01420.1	AT3G01420.1 | Symbols: ALPHA-DOX1, DOX1, DIOX1, PADOX-1 | Peroxidase superfamily protein | chr3:159689-162726 REVERSE LENGTH=639
3	3	3	3	3	3	3	3	3		AT3G01290.1	AT3G01290.1	AT3G01290.1 | Symbols: | SPFH/Band 7/PHB domain-containing membrane-associated protein family | chr3:88252-89356 REVERSE LENGTH=285
3	3	3	3	3	3	3	3	3		AT3G01280.1	AT3G01280.1	AT3G01280.1 | Symbols: VDAC1, ATVDAC1 | voltage dependent anion channel 1 | chr3:85754-87612 FORWARD LENGTH=276
3	3	3	3	3	3	3	3	3		AT3G01180.1	AT3G01180.1	AT3G01180.1 | Symbols: AtSS2, SS2 | starch synthase 2 | chr3:62456-65678 REVERSE LENGTH=792
3	3	3	3	3	3	3	3	3		AT3G01090.3;AT3G01090.1;AT3G01090.2	AT3G01090.3;AT3G01090.1;AT3G01090.2	AT3G01090.3 | Symbols: AKIN10, KIN10 | SNF1 kinase homolog 10 | chr3:31437-33977 REVERSE LENGTH=512;AT3G01090.1 | Symbols: AKIN10, SNRK1.1, KIN10 | SNF1 kinase homolog 10 | chr3:31437-33977 REVERSE LENGTH=512;AT3G01090.2 | Symbols: AKIN10, KIN10 | SNF1 kin
3	3	3	3	3	3	3	3	3		AT2G47990.1	AT2G47990.1	AT2G47990.1 | Symbols: SWA1, EDA13, EDA19 | transducin family protein / WD-40 repeat family protein | chr2:19637010-19638602 REVERSE LENGTH=530
3	3	3	3	3	3	3	3	3		AT2G47940.2;AT2G47940.1	AT2G47940.2;AT2G47940.1	AT2G47940.2 | Symbols: DEGP2 | DEGP protease 2 | chr2:19618372-19622164 REVERSE LENGTH=606;AT2G47940.1 | Symbols: DEGP2 | DEGP protease 2 | chr2:19618372-19622164 REVERSE LENGTH=607
3	3	3	3	3	3	3	3	3		AT2G47850.2;AT2G47850.3;AT2G47850.1	AT2G47850.2;AT2G47850.3;AT2G47850.1	AT2G47850.2 | Symbols: | Zinc finger C-x8-C-x5-C-x3-H type family protein | chr2:19595953-19598119 FORWARD LENGTH=442;AT2G47850.3 | Symbols: | Zinc finger C-x8-C-x5-C-x3-H type family protein | chr2:19595953-19598119 FORWARD LENGTH=468;AT2G47850.1 | Symb
3	3	3	3	3	3	3	3	3		AT2G47730.1	AT2G47730.1	AT2G47730.1 | Symbols: ATGSTF8, ATGSTF5, GST6, GSTF8 | glutathione S-transferase phi 8 | chr2:19558213-19559266 FORWARD LENGTH=263
3	3	3	2	3	3	3	3	3		AT2G47710.1	AT2G47710.1	AT2G47710.1 | Symbols: | Adenine nucleotide alpha hydrolases-like superfamily protein | chr2:19555045-19555956 REVERSE LENGTH=162
3	3	3	3	3	3	3	3	3		AT2G47610.1	AT2G47610.1	AT2G47610.1 | Symbols: | Ribosomal protein L7Ae/L30e/S12e/Gadd45 family protein | chr2:19529854-19531401 FORWARD LENGTH=257
3	3	3	3	3	3	3	3	3		AT2G47510.2;AT2G47510.1	AT2G47510.2;AT2G47510.1;AT5G50950.2;AT5G50950.1;AT5G50950.3	AT2G47510.2 | Symbols: FUM1 | fumarase 1 | chr2:19498614-19502020 FORWARD LENGTH=492;AT2G47510.1 | Symbols: FUM1 | fumarase 1 | chr2:19498614-19502020 FORWARD LENGTH=492
3	3	3	3	3	3	3	3	3		AT2G47390.1	AT2G47390.1	AT2G47390.1 | Symbols: | Prolyl oligopeptidase family protein | chr2:19442278-19446253 REVERSE LENGTH=961
3	3	3	3	3	3	3	3	3		AT2G47250.1	AT2G47250.1	AT2G47250.1 | Symbols: | RNA helicase family protein | chr2:19399923-19402981 REVERSE LENGTH=729
0	1	2	1	3	3	3	3	3		AT2G47210.1	AT2G47210.1	AT2G47210.1 | Symbols: | myb-like transcription factor family protein | chr2:19379039-19382204 FORWARD LENGTH=441
3	3	3	3	3	3	3	3	3		AT2G47170.1;AT1G10630.1;AT1G70490.3;AT1G70490.2;AT1G70490.1;AT1G23490.1;AT5G14670.1	AT2G47170.1;AT1G10630.1;AT1G70490.3;AT1G70490.2;AT1G70490.1;AT1G23490.1;AT5G14670.1	AT2G47170.1 | Symbols: ARF1A1C | Ras-related small GTP-binding family protein | chr2:19367264-19368518 FORWARD LENGTH=181;AT1G10630.1 | Symbols: ATARFA1F, ARFA1F | ADP-ribosylation factor A1F | chr1:3513189-3514230 REVERSE LENGTH=181;AT1G70490.3 | Symbols:
3	3	3	3	3	3	3	3	3		AT2G47110.2;AT2G47110.1	AT2G47110.2;AT2G47110.1	AT2G47110.2 | Symbols: UBQ6 | ubiquitin 6 | chr2:19344701-19345174 FORWARD LENGTH=157;AT2G47110.1 | Symbols: UBQ6 | ubiquitin 6 | chr2:19344701-19345174 FORWARD LENGTH=157
3	3	3	3	3	3	3	3	3		AT2G47000.1;AT4G01820.1	AT2G47000.1;AT4G01820.1;AT4G01830.1;AT1G02520.1	AT2G47000.1 | Symbols: MDR4, PGP4, ABCB4, ATPGP4 | ATP binding cassette subfamily B4 | chr2:19310008-19314750 REVERSE LENGTH=1286;AT4G01820.1 | Symbols: PGP3, MDR3 | P-glycoprotein 3 | chr4:780734-785329 REVERSE LENGTH=1229
3	3	3	3	3	3	3	3	3		AT2G46900.1	AT2G46900.1	AT2G46900.1 | Symbols: | CONTAINS InterPro DOMAIN/s: Basic helix-loop-helix, Nulp1-type (InterPro:IPR006994);Has 2929 Blast hits to 2464 proteins in 333 species: Archae - 2;Bacteria - 151;Metazoa - 913;Fungi - 372;Plants - 141;Viruses - 47;Other Eu
3	3	3	3	3	3	3	3	3		AT2G46820.2;AT2G46820.1	AT2G46820.2;AT2G46820.1	AT2G46820.2 | Symbols: PTAC8, TMP14, PSAP, PSI-P | photosystem I P subunit | chr2:19243729-19244870 FORWARD LENGTH=174;AT2G46820.1 | Symbols: PTAC8, TMP14, PSAP, PSI-P | photosystem I P subunit | chr2:19243729-19244870 FORWARD LENGTH=174
3	3	3	3	3	3	3	3	3		AT2G46740.1	AT2G46740.1	AT2G46740.1 | Symbols: | D-arabinono-1,4-lactone oxidase family protein | chr2:19205182-19207455 REVERSE LENGTH=590
3	3	3	3	3	3	3	3	3		AT2G46560.1	AT2G46560.1	AT2G46560.1 | Symbols: | transducin family protein / WD-40 repeat family protein | chr2:19115570-19125856 REVERSE LENGTH=2513
3	3	3	3	3	3	3	3	3		AT2G46520.1	AT2G46520.1	AT2G46520.1 | Symbols: | cellular apoptosis susceptibility protein, putative / importin-alpha re-exporter, putative | chr2:19096867-19099785 FORWARD LENGTH=972
0	0	1	0	3	3	0	3	3		AT2G46510.1	AT2G46510.1	AT2G46510.1 | Symbols: ATAIB, AIB | ABA-inducible BHLH-type transcription factor | chr2:19091187-19092887 REVERSE LENGTH=566
1	3	3	3	3	3	3	3	3		AT2G46340.1	AT2G46340.1	AT2G46340.1 | Symbols: SPA1 | SPA (suppressor of phyA-105) protein family | chr2:19022572-19026821 REVERSE LENGTH=1029
3	3	3	3	3	3	3	3	3		AT2G46280.2;AT2G46280.1;AT2G46280.3	AT2G46280.2;AT2G46280.1;AT2G46280.3;AT2G46290.1	AT2G46280.2 | Symbols: TRIP-1, TIF3I1 | TGF-beta receptor interacting protein 1 | chr2:19003656-19005393 REVERSE LENGTH=328;AT2G46280.1 | Symbols: TRIP-1, TIF3I1 | TGF-beta receptor interacting protein 1 | chr2:19003656-19005393 REVERSE LENGTH=328;AT2G4628
3	3	3	3	3	3	3	2	2		AT2G46230.1;AT2G46230.2	AT2G46230.1;AT2G46230.2;AT1G26530.1	AT2G46230.1 | Symbols: | PIN domain-like family protein | chr2:18984459-18985850 REVERSE LENGTH=196;AT2G46230.2 | Symbols: | PIN domain-like family protein | chr2:18984694-18985850 REVERSE LENGTH=181
3	2	3	2	3	3	3	3	3		AT2G46020.2;AT2G46020.1	AT2G46020.2;AT2G46020.1	AT2G46020.2 | Symbols: CHR2, ATBRM, BRM, CHA2 | transcription regulatory protein SNF2, putative | chr2:18923304-18931769 FORWARD LENGTH=2193;AT2G46020.1 | Symbols: CHR2, ATBRM, BRM, CHA2 | transcription regulatory protein SNF2, putative | chr2:18923304-189
3	3	3	3	3	3	3	3	3		AT2G45960.2;AT2G45960.1;AT2G45960.3	AT2G45960.2;AT2G45960.1;AT2G45960.3	AT2G45960.2 | Symbols: PIP1B, TMP-A, ATHH2, PIP1;2 | plasma membrane intrinsic protein 1B | chr2:18910450-18911579 FORWARD LENGTH=274;AT2G45960.1 | Symbols: PIP1B, TMP-A, ATHH2, PIP1;2 | plasma membrane intrinsic protein 1B | chr2:18910450-18911703 FORWARD
0	0	0	0	1	3	3	3	3		AT2G45880.1	AT2G45880.1	AT2G45880.1 | Symbols: BMY4, BAM7 | beta-amylase 7 | chr2:18878674-18881824 REVERSE LENGTH=691
3	3	3	3	3	3	3	3	3		AT2G45850.2;AT2G45850.1	AT2G45850.2;AT2G45850.1	AT2G45850.2 | Symbols: | AT hook motif DNA-binding family protein | chr2:18871901-18873457 REVERSE LENGTH=348;AT2G45850.1 | Symbols: | AT hook motif DNA-binding family protein | chr2:18871901-18873457 REVERSE LENGTH=348
3	3	3	3	3	3	3	3	3		AT2G45810.1	AT2G45810.1	AT2G45810.1 | Symbols: | DEA(D/H)-box RNA helicase family protein | chr2:18859836-18862318 FORWARD LENGTH=528
3	3	3	3	3	3	3	3	3		AT2G45790.1	AT2G45790.1	AT2G45790.1 | Symbols: ATPMM, PMM | phosphomannomutase | chr2:18855876-18857753 FORWARD LENGTH=246
2	3	3	3	3	3	2	3	2		AT2G45770.1;AT2G45770.2	AT2G45770.1;AT2G45770.2	AT2G45770.1 | Symbols: CPFTSY, FRD4 | signal recognition particle receptor protein, chloroplast (FTSY) | chr2:18851248-18853402 FORWARD LENGTH=366;AT2G45770.2 | Symbols: CPFTSY | signal recognition particle receptor protein, chloroplast (FTSY) | chr2:18851
3	3	3	3	3	3	3	3	3		AT2G45740.3;AT2G45740.2;AT2G45740.1	AT2G45740.3;AT2G45740.2;AT2G45740.1	AT2G45740.3 | Symbols: PEX11D | peroxin 11D | chr2:18839865-18841102 FORWARD LENGTH=236;AT2G45740.2 | Symbols: PEX11D | peroxin 11D | chr2:18839865-18841102 FORWARD LENGTH=236;AT2G45740.1 | Symbols: PEX11D | peroxin 11D | chr2:18839865-18841102 FORWARD LEN
2	3	2	3	3	3	3	3	3		AT2G45640.1	AT2G45640.1;AT2G45640.2	AT2G45640.1 | Symbols: SAP18, ATSAP18 | SIN3 associated polypeptide P18 | chr2:18799881-18801323 REVERSE LENGTH=152
3	3	3	3	3	3	3	3	3		AT2G45540.1;AT2G45540.2	AT2G45540.1;AT2G45540.2;AT3G60920.1	AT2G45540.1 | Symbols: | WD-40 repeat family protein / beige-related | chr2:18757881-18772229 REVERSE LENGTH=2946;AT2G45540.2 | Symbols: | WD-40 repeat family protein / beige-related | chr2:18757881-18772229 REVERSE LENGTH=3001
3	3	3	3	3	3	3	2	2		AT2G45470.1	AT2G45470.1;AT3G60900.1	AT2G45470.1 | Symbols: FLA8, AGP8 | FASCICLIN-like arabinogalactan protein 8 | chr2:18742797-18744059 REVERSE LENGTH=420
3	3	3	3	3	3	3	3	3		AT2G45300.1	AT2G45300.1	AT2G45300.1 | Symbols: | RNA 3-terminal phosphate cyclase/enolpyruvate transferase, alpha/beta | chr2:18677518-18679868 FORWARD LENGTH=520
3	3	3	3	3	3	3	3	3		AT2G45290.1	AT2G45290.1	AT2G45290.1 | Symbols: | Transketolase | chr2:18672737-18675589 FORWARD LENGTH=741
3	3	3	3	3	3	3	3	3		AT2G45180.1	AT2G45180.1	AT2G45180.1 | Symbols: | Bifunctional inhibitor/lipid-transfer protein/seed storage 2S albumin superfamily protein | chr2:18626377-18626781 FORWARD LENGTH=134
3	3	3	3	3	3	3	3	3		AT2G45030.1;AT1G45332.1	AT2G45030.1;AT1G45332.1	AT2G45030.1 | Symbols: | Translation elongation factor EFG/EF2 protein | chr2:18572411-18576756 FORWARD LENGTH=754;AT1G45332.1 | Symbols: | Translation elongation factor EFG/EF2 protein | chr1:17172507-17176683 REVERSE LENGTH=754
3	1	3	3	3	3	3	3	3		AT2G44950.1	AT2G44950.1	AT2G44950.1 | Symbols: RDO4, HUB1 | histone mono-ubiquitination 1 | chr2:18542602-18548247 REVERSE LENGTH=878
3	3	3	2	3	3	3	3	3		AT2G44730.1	AT2G44730.1	AT2G44730.1 | Symbols: | Alcohol dehydrogenase transcription factor Myb/SANT-like family protein | chr2:18437447-18438565 REVERSE LENGTH=372
3	3	3	3	3	3	3	3	3		AT2G44710.1	AT2G44710.1	AT2G44710.1 | Symbols: | RNA-binding (RRM/RBD/RNP motifs) family protein | chr2:18432902-18436629 FORWARD LENGTH=809
3	3	3	3	3	3	3	3	3		AT2G44650.1	AT2G44650.1	AT2G44650.1 | Symbols: CHL-CPN10, CPN10 | chloroplast chaperonin 10 | chr2:18419521-18420510 REVERSE LENGTH=139
3	3	3	3	3	3	3	3	3		AT2G44640.1	AT2G44640.1	AT2G44640.1 | Symbols: | FUNCTIONS IN: molecular_function unknown;INVOLVED IN: biological_process unknown;LOCATED IN: mitochondrion, chloroplast, plasma membrane, plastid, chloroplast envelope;EXPRESSED IN: 23 plant structures;EXPRESSED DURING: 13 gro
3	3	3	3	3	3	3	3	3		AT2G44610.1	AT2G44610.1;AT5G10260.1;AT2G22290.1;AT4G39890.1;AT5G64990.1	AT2G44610.1 | Symbols: RAB6, ATRABH1B, ATRAB6A, RAB6A | Ras-related small GTP-binding family protein | chr2:18411778-18413883 REVERSE LENGTH=208
3	3	3	3	3	3	3	3	3		AT2G44530.2;AT2G44530.1	AT2G44530.2;AT2G44530.1	AT2G44530.2 | Symbols: | Phosphoribosyltransferase family protein | chr2:18383732-18385974 FORWARD LENGTH=393;AT2G44530.1 | Symbols: | Phosphoribosyltransferase family protein | chr2:18383732-18385974 FORWARD LENGTH=394
3	3	3	2	3	3	3	3	3		AT2G44490.1	AT2G44490.1	AT2G44490.1 | Symbols: PEN2, BGLU26 | Glycosyl hydrolase superfamily protein | chr2:18364872-18367515 FORWARD LENGTH=560
2	3	3	3	3	3	2	3	3		AT2G44440.1	AT2G44440.1	AT2G44440.1 | Symbols: | Emsy N Terminus (ENT) domain-containing protein | chr2:18336621-18338950 REVERSE LENGTH=429
3	3	3	3	3	3	3	2	3		AT2G44350.1;AT2G44350.2	AT2G44350.1;AT2G44350.2;AT3G60100.1	AT2G44350.1 | Symbols: ATCS, CSY4 | Citrate synthase family protein | chr2:18316673-18320524 FORWARD LENGTH=473;AT2G44350.2 | Symbols: ATCS, CSY4 | Citrate synthase family protein | chr2:18316673-18320524 FORWARD LENGTH=474
3	3	3	3	3	3	3	3	3		AT2G44210.1;AT2G44210.2	AT2G44210.1;AT2G44210.2	AT2G44210.1 | Symbols: | Protein of Unknown Function (DUF239) | chr2:18280809-18282591 FORWARD LENGTH=415;AT2G44210.2 | Symbols: | Protein of Unknown Function (DUF239) | chr2:18280809-18282591 FORWARD LENGTH=445
2	1	1	3	3	3	3	3	3		AT2G44200.1	AT2G44200.1;AT1G32340.1	AT2G44200.1 | Symbols: | CBF1-interacting co-repressor CIR, N-terminal;Pre-mRNA splicing factor | chr2:18276302-18278240 FORWARD LENGTH=493
3	3	3	3	3	3	3	3	3		AT2G44160.1	AT2G44160.1	AT2G44160.1 | Symbols: MTHFR2 | methylenetetrahydrofolate reductase 2 | chr2:18262301-18265185 FORWARD LENGTH=594
3	3	3	3	3	3	3	3	3		AT2G44120.1;AT2G44120.2	AT2G44120.1;AT2G44120.2	AT2G44120.1 | Symbols: | Ribosomal protein L30/L7 family protein | chr2:18249227-18250402 REVERSE LENGTH=242;AT2G44120.2 | Symbols: | Ribosomal protein L30/L7 family protein | chr2:18249227-18250417 REVERSE LENGTH=247
3	3	3	3	3	3	3	3	3		AT2G44100.2;AT2G44100.1	AT2G44100.2;AT2G44100.1	AT2G44100.2 | Symbols: ATGDI1, AT-GDI1, GDI1 | guanosine nucleotide diphosphate dissociation inhibitor 1 | chr2:18241804-18244731 FORWARD LENGTH=431;AT2G44100.1 | Symbols: ATGDI1, AT-GDI1, GDI1 | guanosine nucleotide diphosphate dissociation inhibitor 1 |
3	3	3	3	3	3	3	3	3		AT2G44065.2;AT2G44065.1	AT2G44065.2;AT2G44065.1	AT2G44065.2 | Symbols: | Ribosomal protein L2 family | chr2:18228860-18230368 FORWARD LENGTH=214;AT2G44065.1 | Symbols: | Ribosomal protein L2 family | chr2:18228860-18230368 FORWARD LENGTH=214
3	3	3	3	3	3	3	3	3		AT2G44060.2;AT2G44060.1	AT2G44060.2;AT2G44060.1	AT2G44060.2 | Symbols: | Late embryogenesis abundant protein, group 2 | chr2:18226922-18227988 FORWARD LENGTH=325;AT2G44060.1 | Symbols: | Late embryogenesis abundant protein, group 2 | chr2:18226922-18227988 FORWARD LENGTH=325
3	3	3	3	3	3	3	3	3		AT2G43970.1;AT2G43970.2	AT2G43970.1;AT2G43970.2	AT2G43970.1 | Symbols: | RNA-binding protein | chr2:18205535-18208031 REVERSE LENGTH=545;AT2G43970.2 | Symbols: | RNA-binding protein | chr2:18205535-18208031 REVERSE LENGTH=529
3	3	3	3	3	3	3	3	3		AT2G43950.1;AT2G43950.2;AT2G43950.3	AT2G43950.1;AT2G43950.2;AT2G43950.3	AT2G43950.1 | Symbols: OEP37, ATOEP37 | chloroplast outer envelope protein 37 | chr2:18200553-18202644 REVERSE LENGTH=343;AT2G43950.2 | Symbols: OEP37 | chloroplast outer envelope protein 37 | chr2:18200830-18202644 REVERSE LENGTH=333;AT2G43950.3 | Symbols
3	3	3	3	3	3	3	3	3		AT2G43910.1;AT2G43910.2	AT2G43910.1;AT2G43910.2;AT2G43910.3;AT2G43920.3;AT2G43920.2;AT2G43920.1	AT2G43910.1 | Symbols: ATHOL1, HOL1 | HARMLESS TO OZONE LAYER 1 | chr2:18184658-18186951 REVERSE LENGTH=227;AT2G43910.2 | Symbols: ATHOL1, HOL1 | HARMLESS TO OZONE LAYER 1 | chr2:18184596-18186951 REVERSE LENGTH=246
3	3	3	3	3	3	3	3	3		AT2G43820.1	AT2G43820.1;AT2G43840.2;AT2G43840.1	AT2G43820.1 | Symbols: GT, UGT74F2, ATSAGT1, SGT1, SAGT1 | UDP-glucosyltransferase 74F2 | chr2:18152279-18153715 FORWARD LENGTH=449
3	3	3	3	3	3	3	3	3		AT2G43770.1	AT2G43770.1	AT2G43770.1 | Symbols: | Transducin/WD40 repeat-like superfamily protein | chr2:18134272-18135303 REVERSE LENGTH=343
3	3	3	3	3	3	3	3	3		AT2G43750.2;AT2G43750.1	AT2G43750.2;AT2G43750.1	AT2G43750.2 | Symbols: OASB | O-acetylserine (thiol) lyase B | chr2:18129604-18132322 REVERSE LENGTH=392;AT2G43750.1 | Symbols: OASB, ACS1, CPACS1, ATCS-B | O-acetylserine (thiol) lyase B | chr2:18129604-18132322 REVERSE LENGTH=392
3	3	3	3	3	3	3	3	3		AT2G43360.1	AT2G43360.1	AT2G43360.1 | Symbols: BIO2, BIOB | Radical SAM superfamily protein | chr2:18010918-18013129 REVERSE LENGTH=378
2	2	2	2	2	3	1	3	1		AT2G43110.1	AT2G43110.1	AT2G43110.1 | Symbols: | unknown protein;Has 212 Blast hits to 211 proteins in 96 species: Archae - 0;Bacteria - 6;Metazoa - 62;Fungi - 91;Plants - 31;Viruses - 0;Other Eukaryotes - 22 (source: NCBI BLink). | chr2:17922067-17924291 FORWARD LENGTH=2
3	3	3	3	3	3	3	3	3		AT2G43030.1	AT2G43030.1	AT2G43030.1 | Symbols: | Ribosomal protein L3 family protein | chr2:17894898-17895713 FORWARD LENGTH=271
3	3	3	3	3	3	3	3	3		AT2G42790.1	AT2G42790.1	AT2G42790.1 | Symbols: CSY3 | citrate synthase 3 | chr2:17803132-17805991 REVERSE LENGTH=509
3	3	3	3	3	3	3	3	3		AT2G42600.2;AT2G42600.1	AT2G42600.2;AT2G42600.1;AT3G42628.1	AT2G42600.2 | Symbols: ATPPC2, PPC2 | phosphoenolpyruvate carboxylase 2 | chr2:17734541-17738679 REVERSE LENGTH=963;AT2G42600.1 | Symbols: ATPPC2, PPC2 | phosphoenolpyruvate carboxylase 2 | chr2:17734541-17738679 REVERSE LENGTH=963
3	3	3	3	3	3	3	3	3		AT2G42560.1	AT2G42560.1	AT2G42560.1 | Symbols: | late embryogenesis abundant domain-containing protein / LEA domain-containing protein | chr2:17714813-17716821 REVERSE LENGTH=635
3	3	3	3	3	3	3	3	3		AT2G42520.1	AT2G42520.1	AT2G42520.1 | Symbols: | P-loop containing nucleoside triphosphate hydrolases superfamily protein | chr2:17705382-17708744 FORWARD LENGTH=633
3	3	3	3	3	3	3	3	3		AT2G42220.1	AT2G42220.1	AT2G42220.1 | Symbols: | Rhodanese/Cell cycle control phosphatase superfamily protein | chr2:17592105-17593305 FORWARD LENGTH=234
3	3	3	3	3	3	3	3	3		AT2G42210.4;AT2G42210.3;AT2G42210.1;AT2G42210.2	AT2G42210.4;AT2G42210.3;AT2G42210.1;AT2G42210.2	AT2G42210.4 | Symbols: ATOEP16-3, OEP16-3 | Mitochondrial import inner membrane translocase subunit Tim17/Tim22/Tim23 family protein | chr2:17590642-17591591 FORWARD LENGTH=159;AT2G42210.3 | Symbols: ATOEP16-3, OEP16-3 | Mitochondrial import inner membrane
3	3	3	3	3	3	3	3	3		AT2G42010.1	AT2G42010.1;AT4G00240.1	AT2G42010.1 | Symbols: PLDBETA1, PLDBETA | phospholipase D beta 1 | chr2:17533018-17537990 REVERSE LENGTH=1083
1	3	3	3	3	3	3	3	3		AT2G41900.1	AT2G41900.1;AT2G40140.2;AT2G40140.1;AT5G58620.1	AT2G41900.1 | Symbols: | CCCH-type zinc finger protein with ARM repeat domain | chr2:17491352-17493502 FORWARD LENGTH=716
3	3	3	3	3	3	3	3	3		AT2G41840.1	AT2G41840.1	AT2G41840.1 | Symbols: | Ribosomal protein S5 family protein | chr2:17460016-17461398 REVERSE LENGTH=285
3	3	3	3	3	3	3	3	3		AT2G41800.1	AT2G41800.1	AT2G41800.1 | Symbols: | Protein of unknown function, DUF642 | chr2:17436671-17438005 REVERSE LENGTH=370
3	3	3	3	3	3	3	3	3		AT2G41790.1	AT2G41790.1;AT3G57470.1;AT3G57470.3;AT3G57470.2	AT2G41790.1 | Symbols: | Insulinase (Peptidase family M16) family protein | chr2:17429453-17436110 REVERSE LENGTH=970
3	3	3	3	3	3	3	3	3		AT2G41740.1	AT2G41740.1	AT2G41740.1 | Symbols: VLN2, ATVLN2 | villin 2 | chr2:17410962-17416878 REVERSE LENGTH=976
3	3	3	3	3	3	3	3	3		AT2G41680.1	AT2G41680.1	AT2G41680.1 | Symbols: NTRC | NADPH-dependent thioredoxin reductase C | chr2:17376349-17379028 REVERSE LENGTH=529
3	3	3	3	3	3	3	3	3		AT2G41620.1	AT2G41620.1	AT2G41620.1 | Symbols: | Nucleoporin interacting component (Nup93/Nic96-like) family protein | chr2:17350419-17354997 REVERSE LENGTH=861
3	3	3	3	3	3	3	3	3		AT2G41560.1	AT2G41560.1;AT2G22950.1	AT2G41560.1 | Symbols: ACA4 | autoinhibited Ca(2+)-ATPase, isoform 4 | chr2:17332256-17337179 REVERSE LENGTH=1030
3	3	3	3	3	3	3	3	3		AT2G41530.1	AT2G41530.1	AT2G41530.1 | Symbols: ATSFGH, SFGH | S-formylglutathione hydrolase | chr2:17323656-17325430 REVERSE LENGTH=284
3	3	3	3	3	3	3	3	3		AT2G41475.1	AT2G41475.1	AT2G41475.1 | Symbols: | Embryo-specific protein 3, (ATS3) | chr2:17295259-17296329 REVERSE LENGTH=179
2	3	3	3	2	3	3	3	3		AT2G41250.1	AT2G41250.1	AT2G41250.1 | Symbols: | Haloacid dehalogenase-like hydrolase (HAD) superfamily protein | chr2:17200862-17202551 REVERSE LENGTH=290
2	3	3	3	3	3	3	3	3		AT2G41100.4;AT2G41100.1;AT2G41100.3	AT2G41100.4;AT2G41100.1;AT2G41100.3;AT2G41100.2	AT2G41100.4 | Symbols: TCH3 | Calcium-binding EF hand family protein | chr2:17138131-17139406 FORWARD LENGTH=324;AT2G41100.1 | Symbols: TCH3, ATCAL4 | Calcium-binding EF hand family protein | chr2:17138131-17139406 FORWARD LENGTH=324;AT2G41100.3 | Symbols:
1	3	3	3	3	3	3	3	3		AT2G40930.1	AT2G40930.1	AT2G40930.1 | Symbols: UBP5, ATUBP5, PDE323 | ubiquitin-specific protease 5 | chr2:17076714-17082192 REVERSE LENGTH=924
3	3	3	3	3	3	3	3	3		AT2G40840.1	AT2G40840.1	AT2G40840.1 | Symbols: DPE2 | disproportionating enzyme 2 | chr2:17045368-17050779 FORWARD LENGTH=955
3	3	3	3	3	3	3	3	3		AT2G40765.1	AT2G40765.1	AT2G40765.1 | Symbols: | unknown protein;FUNCTIONS IN: molecular_function unknown;INVOLVED IN: biological_process unknown;LOCATED IN: mitochondrion, mitochondrial respiratory chain complex III;EXPRESSED IN: 24 plant structures;EXPRESSED DURING: 15 gr
2	3	3	3	3	3	3	3	3		AT2G40730.1	AT2G40730.1	AT2G40730.1 | Symbols: | Protein kinase family protein with ARM repeat domain | chr2:16990083-16996072 REVERSE LENGTH=798
3	3	3	3	3	3	3	3	3		AT2G40660.1	AT2G40660.1	AT2G40660.1 | Symbols: | Nucleic acid-binding, OB-fold-like protein | chr2:16966011-16968866 FORWARD LENGTH=389
3	3	3	3	3	3	3	3	3		AT2G40650.1	AT2G40650.1	AT2G40650.1 | Symbols: | PRP38 family protein | chr2:16963588-16965596 REVERSE LENGTH=355
3	3	3	3	3	3	3	3	3		AT2G40590.1	AT2G40590.1	AT2G40590.1 | Symbols: | Ribosomal protein S26e family protein | chr2:16945215-16946345 REVERSE LENGTH=131
3	3	3	3	3	3	3	3	3		AT2G40510.1	AT2G40510.1	AT2G40510.1 | Symbols: | Ribosomal protein S26e family protein | chr2:16918506-16919623 FORWARD LENGTH=133
3	3	3	3	3	3	3	3	3		AT2G40490.1	AT2G40490.1	AT2G40490.1 | Symbols: HEME2 | Uroporphyrinogen decarboxylase | chr2:16912961-16914988 FORWARD LENGTH=394
3	3	3	3	3	3	3	3	3		AT2G40360.1	AT2G40360.1	AT2G40360.1 | Symbols: | Transducin/WD40 repeat-like superfamily protein | chr2:16853123-16856635 REVERSE LENGTH=753
3	3	3	3	3	3	3	3	3		AT2G40290.1;AT2G40290.3;AT2G40290.2	AT2G40290.1;AT2G40290.3;AT2G40290.2	AT2G40290.1 | Symbols: | Eukaryotic translation initiation factor 2 subunit 1 | chr2:16829030-16830889 REVERSE LENGTH=344;AT2G40290.3 | Symbols: | Eukaryotic translation initiation factor 2 subunit 1 | chr2:16829872-16830889 REVERSE LENGTH=241;AT2G40290.
3	3	3	3	3	3	3	3	3		AT2G39990.1	AT2G39990.1	AT2G39990.1 | Symbols: EIF2, AteIF3f, eIF3F | eukaryotic translation initiation factor 2 | chr2:16698332-16699929 REVERSE LENGTH=293
3	3	3	3	3	3	3	3	3		AT2G39800.4;AT2G39800.1;AT2G39800.3;AT2G39800.2	AT2G39800.4;AT2G39800.1;AT2G39800.3;AT2G39800.2	AT2G39800.4 | Symbols: P5CS1 | delta1-pyrroline-5-carboxylate synthase 1 | chr2:16598516-16602939 REVERSE LENGTH=717;AT2G39800.1 | Symbols: P5CS1, ATP5CS | delta1-pyrroline-5-carboxylate synthase 1 | chr2:16598516-16602939 REVERSE LENGTH=717;AT2G39800.3 |
3	3	3	3	3	3	3	3	3		AT2G39770.2;AT2G39770.1	AT2G39770.2;AT2G39770.1;AT3G55590.1	AT2G39770.2 | Symbols: CYT1 | Glucose-1-phosphate adenylyltransferase family protein | chr2:16589401-16590741 FORWARD LENGTH=361;AT2G39770.1 | Symbols: CYT1, VTC1, SOZ1, EMB101, GMP1 | Glucose-1-phosphate adenylyltransferase family protein | chr2:16589401-
3	3	3	3	3	3	3	3	3		AT2G39730.2	AT2G39730.2	AT2G39730.2 | Symbols: RCA | rubisco activase | chr2:16571046-16573345 REVERSE LENGTH=446
3	3	3	3	3	3	3	3	3		AT2G39730.1;AT2G39730.3	AT2G39730.1;AT2G39730.3	AT2G39730.1 | Symbols: RCA | rubisco activase | chr2:16570951-16573345 REVERSE LENGTH=474;AT2G39730.3 | Symbols: RCA | rubisco activase | chr2:16571174-16573345 REVERSE LENGTH=441
3	3	3	3	3	3	3	3	3		AT2G39670.1;AT2G39670.2	AT2G39670.1;AT2G39670.2	AT2G39670.1 | Symbols: | Radical SAM superfamily protein | chr2:16534303-16536986 FORWARD LENGTH=428;AT2G39670.2 | Symbols: | Radical SAM superfamily protein | chr2:16534303-16536986 FORWARD LENGTH=431
3	3	3	3	3	3	3	3	3		AT2G39580.1	AT2G39580.1	AT2G39580.1 | Symbols: | CONTAINS InterPro DOMAIN/s: Putative zinc-finger domain (InterPro:IPR019607);Has 249 Blast hits to 219 proteins in 85 species: Archae - 0;Bacteria - 144;Metazoa - 29;Fungi - 8;Plants - 50;Viruses - 0;Other Eukaryotes - 18 (
3	3	3	3	3	3	3	3	3		AT2G39390.1;AT5G02610.1;AT5G02610.2	AT2G39390.1;AT5G02610.1;AT5G02610.2	AT2G39390.1 | Symbols: | Ribosomal L29 family protein | chr2:16450803-16451762 REVERSE LENGTH=123;AT5G02610.1 | Symbols: | Ribosomal L29 family protein | chr5:587611-588547 FORWARD LENGTH=123;AT5G02610.2 | Symbols: | Ribosomal L29 family protein | ch
3	3	3	3	3	3	3	3	3		AT2G39310.3;AT2G39310.1;AT2G39310.2	AT2G39310.3;AT2G39310.1;AT2G39310.2;AT2G39330.1	AT2G39310.3 | Symbols: | jacalin-related lectin 22 | chr2:16414262-16416323 REVERSE LENGTH=458;AT2G39310.1 | Symbols: JAL22 | jacalin-related lectin 22 | chr2:16414262-16416323 REVERSE LENGTH=458;AT2G39310.2 | Symbols: JAL22 | jacalin-related lectin 22 |
3	3	3	3	3	3	3	3	3		AT2G39010.1	AT2G39010.1	AT2G39010.1 | Symbols: PIP2E, PIP2;6 | plasma membrane intrinsic protein 2E | chr2:16291564-16293746 FORWARD LENGTH=289
2	3	3	3	3	3	3	3	3		AT2G38770.1	AT2G38770.1	AT2G38770.1 | Symbols: EMB2765 | P-loop containing nucleoside triphosphate hydrolases superfamily protein | chr2:16203185-16210253 REVERSE LENGTH=1509
3	3	3	3	3	3	3	3	3		AT2G38750.1	AT2G38750.1	AT2G38750.1 | Symbols: ANNAT4 | annexin 4 | chr2:16196582-16198431 REVERSE LENGTH=319
3	3	3	3	3	3	3	3	3		AT2G38670.1	AT2G38670.1	AT2G38670.1 | Symbols: PECT1 | phosphorylethanolamine cytidylyltransferase 1 | chr2:16168979-16171680 FORWARD LENGTH=421
3	3	3	3	3	3	3	3	3		AT2G38610.2;AT2G38610.1	AT2G38610.2;AT2G38610.1	AT2G38610.2 | Symbols: | RNA-binding KH domain-containing protein | chr2:16147552-16149638 REVERSE LENGTH=286;AT2G38610.1 | Symbols: | RNA-binding KH domain-containing protein | chr2:16147552-16149638 REVERSE LENGTH=286
3	3	3	3	3	3	3	3	3		AT2G38540.1	AT2G38540.1	AT2G38540.1 | Symbols: LP1, LTP1, ATLTP1 | lipid transfer protein 1 | chr2:16130418-16130893 FORWARD LENGTH=118
3	3	3	3	3	3	3	3	3		AT2G38530.1	AT2G38530.1	AT2G38530.1 | Symbols: LTP2, LP2, cdf3 | lipid transfer protein 2 | chr2:16128481-16128948 FORWARD LENGTH=118
0	0	0	0	2	3	0	0	2		AT2G38300.1	AT2G38300.1	AT2G38300.1 | Symbols: | myb-like HTH transcriptional regulator family protein | chr2:16044175-16045679 REVERSE LENGTH=340
3	3	3	3	3	3	3	3	3		AT2G38230.1	AT2G38230.1	AT2G38230.1 | Symbols: ATPDX1.1, PDX1.1 | pyridoxine biosynthesis 1.1 | chr2:16011475-16012404 FORWARD LENGTH=309
1	3	3	3	3	3	2	1	0		AT2G38170.2;AT2G38170.1;AT2G38170.3;AT3G51860.1	AT2G38170.2;AT2G38170.1;AT2G38170.3;AT3G51860.1	AT2G38170.2 | Symbols: CAX1, ATCAX1, RCI4 | cation exchanger 1 | chr2:15990574-15993178 REVERSE LENGTH=392;AT2G38170.1 | Symbols: CAX1, ATCAX1, RCI4 | cation exchanger 1 | chr2:15989429-15993178 REVERSE LENGTH=463;AT2G38170.3 | Symbols: CAX1, ATCAX1, RCI4
3	3	3	3	3	3	3	3	3		AT2G38040.2;AT2G38040.1	AT2G38040.2;AT2G38040.1	AT2G38040.2 | Symbols: CAC3 | acetyl Co-enzyme a carboxylase carboxyltransferase alpha subunit | chr2:15917612-15920749 FORWARD LENGTH=769;AT2G38040.1 | Symbols: CAC3 | acetyl Co-enzyme a carboxylase carboxyltransferase alpha subunit | chr2:15917612-159207
3	3	3	3	3	3	3	3	3		AT2G38020.1;AT2G38020.2	AT2G38020.1;AT2G38020.2	AT2G38020.1 | Symbols: VCL1, MAN, EMB258 | vacuoleless1 (VCL1) | chr2:15910098-15914190 REVERSE LENGTH=858;AT2G38020.2 | Symbols: VCL1, MAN, EMB258 | vacuoleless1 (VCL1) | chr2:15910272-15914190 REVERSE LENGTH=834
3	3	3	3	3	3	3	3	3		AT2G37690.1	AT2G37690.1;AT2G05140.1	AT2G37690.1 | Symbols: | phosphoribosylaminoimidazole carboxylase, putative / AIR carboxylase, putative | chr2:15806111-15810240 FORWARD LENGTH=642
2	3	3	3	3	3	3	3	3		AT2G37340.3;AT2G37340.1;AT2G37340.2	AT2G37340.3;AT2G37340.1;AT2G37340.2	AT2G37340.3 | Symbols: RSZ33, RS2Z33, AT-RS2Z33 | arginine/serine-rich zinc knuckle-containing protein 33 | chr2:15670372-15671584 REVERSE LENGTH=249;AT2G37340.1 | Symbols: RSZ33, ATRSZ33, RS2Z33, AT-RS2Z33 | arginine/serine-rich zinc knuckle-containing pr
3	3	3	3	3	3	3	3	3		AT2G37270.2;AT2G37270.1	AT2G37270.2;AT2G37270.1	AT2G37270.2 | Symbols: ATRPS5B, RPS5B | ribosomal protein 5B | chr2:15647883-15649042 REVERSE LENGTH=207;AT2G37270.1 | Symbols: ATRPS5B, RPS5B | ribosomal protein 5B | chr2:15647883-15649042 REVERSE LENGTH=207
3	3	3	3	3	3	3	3	3		AT2G37230.1	AT2G37230.1	AT2G37230.1 | Symbols: | Tetratricopeptide repeat (TPR)-like superfamily protein | chr2:15637177-15639450 REVERSE LENGTH=757
2	3	3	2	3	2	3	3	3		AT2G37220.1	AT2G37220.1	AT2G37220.1 | Symbols: | RNA-binding (RRM/RBD/RNP motifs) family protein | chr2:15634980-15636331 REVERSE LENGTH=289
3	3	3	3	3	3	3	3	3		AT2G37170.1	AT2G37170.1	AT2G37170.1 | Symbols: PIP2B, PIP2;2 | plasma membrane intrinsic protein 2 | chr2:15613624-15614791 REVERSE LENGTH=285
0	3	3	3	3	3	3	3	3		AT2G37040.1	AT2G37040.1	AT2G37040.1 | Symbols: PAL1, ATPAL1 | PHE ammonia lyase 1 | chr2:15557602-15560237 REVERSE LENGTH=725
3	3	3	3	3	3	3	3	3		AT2G36880.2;AT2G36880.1	AT2G36880.2;AT2G36880.1	AT2G36880.2 | Symbols: MAT3 | methionine adenosyltransferase 3 | chr2:15479721-15480893 REVERSE LENGTH=390;AT2G36880.1 | Symbols: MAT3 | methionine adenosyltransferase 3 | chr2:15479721-15480893 REVERSE LENGTH=390
3	3	3	3	3	3	3	3	3		AT2G36870.1;AT2G36870.2	AT2G36870.1;AT2G36870.2	AT2G36870.1 | Symbols: XTH32 | xyloglucan endotransglucosylase/hydrolase 32 | chr2:15472869-15474630 REVERSE LENGTH=299;AT2G36870.2 | Symbols: XTH32 | xyloglucan endotransglucosylase/hydrolase 32 | chr2:15473911-15474630 REVERSE LENGTH=178
3	3	3	3	3	3	3	3	3		AT2G36850.1	AT2G36850.1	AT2G36850.1 | Symbols: ATGSL08, GSL8, GSL08, ATGSL8, CHOR | glucan synthase-like 8 | chr2:15454935-15469666 REVERSE LENGTH=1904
3	3	3	2	3	3	3	3	3		AT2G36830.1	AT2G36830.1	AT2G36830.1 | Symbols: GAMMA-TIP, TIP1;1, GAMMA-TIP1 | gamma tonoplast intrinsic protein | chr2:15445490-15446336 FORWARD LENGTH=251
3	3	3	3	3	3	3	3	3		AT2G36810.1	AT2G36810.1	AT2G36810.1 | Symbols: | ARM repeat superfamily protein | chr2:15425739-15439462 REVERSE LENGTH=1716
3	3	3	3	3	3	3	3	3		AT2G36580.1	AT2G36580.1	AT2G36580.1 | Symbols: | Pyruvate kinase family protein | chr2:15339253-15342781 FORWARD LENGTH=527
3	3	3	3	3	3	3	3	3		AT2G36530.1	AT2G36530.1	AT2G36530.1 | Symbols: LOS2, ENO2 | Enolase | chr2:15321081-15323786 REVERSE LENGTH=444
0	2	1	1	1	3	2	3	3		AT2G36480.1;AT2G36480.2;AT2G36480.3	AT2G36480.1;AT2G36480.2;AT2G36480.3	AT2G36480.1 | Symbols: | ENTH/VHS family protein | chr2:15303114-15306274 REVERSE LENGTH=830;AT2G36480.2 | Symbols: | ENTH/VHS family protein | chr2:15302567-15306274 REVERSE LENGTH=844;AT2G36480.3 | Symbols: | ENTH/VHS family protein | chr2:15302567-15
3	3	3	3	3	3	3	3	3		AT2G36460.1;AT2G36460.2	AT2G36460.1;AT2G36460.2	AT2G36460.1 | Symbols: | Aldolase superfamily protein | chr2:15296929-15298387 REVERSE LENGTH=358;AT2G36460.2 | Symbols: | Aldolase superfamily protein | chr2:15296929-15297732 REVERSE LENGTH=267
3	3	3	3	3	3	3	3	3		AT2G36390.1	AT2G36390.1	AT2G36390.1 | Symbols: SBE2.1, BE3 | starch branching enzyme 2.1 | chr2:15264283-15269940 FORWARD LENGTH=858
3	3	3	3	3	3	3	3	3		AT2G36250.2;AT2G36250.1	AT2G36250.2;AT2G36250.1	AT2G36250.2 | Symbols: FTSZ2-1, ATFTSZ2-1 | Tubulin/FtsZ family protein | chr2:15197661-15199932 REVERSE LENGTH=478;AT2G36250.1 | Symbols: FTSZ2-1, ATFTSZ2-1 | Tubulin/FtsZ family protein | chr2:15197661-15199932 REVERSE LENGTH=478
3	3	3	3	3	3	3	3	3		AT2G36160.1	AT2G36160.1	AT2G36160.1 | Symbols: | Ribosomal protein S11 family protein | chr2:15169925-15171159 FORWARD LENGTH=150
3	3	3	3	3	3	3	3	3		AT2G35840.3;AT2G35840.2;AT2G35840.1	AT2G35840.3;AT2G35840.2;AT2G35840.1;AT1G51420.1	AT2G35840.3 | Symbols: | Sucrose-6F-phosphate phosphohydrolase family protein | chr2:15053952-15055776 FORWARD LENGTH=422;AT2G35840.2 | Symbols: | Sucrose-6F-phosphate phosphohydrolase family protein | chr2:15053952-15055776 FORWARD LENGTH=422;AT2G35840.
1	1	0	3	2	3	3	3	3		AT2G35530.1	AT2G35530.1	AT2G35530.1 | Symbols: bZIP16, AtbZIP16 | basic region/leucine zipper transcription factor 16 | chr2:14923280-14926025 REVERSE LENGTH=409
3	3	3	3	3	3	3	3	3		AT2G34700.1	AT2G34700.1	AT2G34700.1 | Symbols: | Pollen Ole e 1 allergen and extensin family protein | chr2:14634298-14635597 REVERSE LENGTH=175
3	3	3	3	3	3	3	3	2		AT2G34680.1	AT2G34680.1	AT2G34680.1 | Symbols: AIR9 | Outer arm dynein light chain 1 protein | chr2:14616947-14628300 REVERSE LENGTH=1708
3	3	3	3	3	3	2	3	3		AT2G34640.1	AT2G34640.1	AT2G34640.1 | Symbols: PTAC12, HMR | plastid transcriptionally active 12 | chr2:14582061-14584345 REVERSE LENGTH=527
3	3	3	3	3	3	3	3	3		AT2G34590.1;AT1G30120.1	AT2G34590.1;AT1G30120.1	AT2G34590.1 | Symbols: | Transketolase family protein | chr2:14568956-14570844 REVERSE LENGTH=406;AT1G30120.1 | Symbols: PDH-E1 BETA | pyruvate dehydrogenase E1 beta | chr1:10584350-10586477 REVERSE LENGTH=406
2	3	3	3	3	3	3	3	3		AT2G34560.1;AT2G34560.2	AT2G34560.1;AT2G34560.2	AT2G34560.1 | Symbols: | P-loop containing nucleoside triphosphate hydrolases superfamily protein | chr2:14560266-14562695 FORWARD LENGTH=384;AT2G34560.2 | Symbols: | P-loop containing nucleoside triphosphate hydrolases superfamily protein | chr2:1456026
3	3	3	3	3	3	3	3	3		AT2G34480.1	AT2G34480.1	AT2G34480.1 | Symbols: | Ribosomal protein L18ae/LX family protein | chr2:14532916-14534161 REVERSE LENGTH=178
3	3	3	3	3	3	3	3	3		AT2G34430.1	AT2G34430.1	AT2G34430.1 | Symbols: LHB1B1, LHCB1.4 | light-harvesting chlorophyll-protein complex II subunit B1 | chr2:14524818-14525618 FORWARD LENGTH=266
3	3	3	3	3	3	3	3	3		AT2G34420.1	AT2G34420.1	AT2G34420.1 | Symbols: LHB1B2, LHCB1.5 | photosystem II light harvesting complex gene B1B2 | chr2:14522716-14523513 REVERSE LENGTH=265
3	3	3	3	3	3	3	3	3		AT2G34250.2;AT2G34250.1;AT1G29310.1	AT2G34250.2;AT2G34250.1;AT1G29310.1;AT1G78720.1	AT2G34250.2 | Symbols: | SecY protein transport family protein | chr2:14462635-14464572 FORWARD LENGTH=475;AT2G34250.1 | Symbols: | SecY protein transport family protein | chr2:14462635-14464572 FORWARD LENGTH=475;AT1G29310.1 | Symbols: | SecY protein t
3	3	3	3	3	3	3	3	3		AT2G34040.1;AT2G34040.2	AT2G34040.1;AT2G34040.2	AT2G34040.1 | Symbols: | Apoptosis inhibitory protein 5 (API5) | chr2:14377957-14382246 REVERSE LENGTH=553;AT2G34040.2 | Symbols: | Apoptosis inhibitory protein 5 (API5) | chr2:14378571-14382246 REVERSE LENGTH=442
3	3	3	3	3	3	3	3	3		AT2G33800.1	AT2G33800.1	AT2G33800.1 | Symbols: | Ribosomal protein S5 family protein | chr2:14300925-14302352 REVERSE LENGTH=303
3	3	3	3	3	3	3	3	3		AT2G33730.1	AT2G33730.1;AT1G28180.1	AT2G33730.1 | Symbols: | P-loop containing nucleoside triphosphate hydrolases superfamily protein | chr2:14265679-14267880 REVERSE LENGTH=733
3	3	3	3	3	3	3	3	3		AT2G33450.1	AT2G33450.1	AT2G33450.1 | Symbols: | Ribosomal L28 family | chr2:14173620-14174380 FORWARD LENGTH=143
2	3	3	2	3	3	3	3	3		AT2G33410.1	AT2G33410.1	AT2G33410.1 | Symbols: | RNA-binding (RRM/RBD/RNP motifs) family protein | chr2:14156085-14157435 FORWARD LENGTH=404
3	3	3	3	3	3	3	3	3		AT2G33340.2;AT2G33340.1;AT2G33340.3	AT2G33340.2;AT2G33340.1;AT2G33340.3	AT2G33340.2 | Symbols: MAC3B | MOS4-associated complex 3B | chr2:14126584-14131000 REVERSE LENGTH=525;AT2G33340.1 | Symbols: MAC3B | MOS4-associated complex 3B | chr2:14126584-14131000 REVERSE LENGTH=525;AT2G33340.3 | Symbols: MAC3B | MOS4-associated co
3	3	3	2	3	3	2	1	2		AT2G33330.1	AT2G33330.1	AT2G33330.1 | Symbols: PDLP3 | plasmodesmata-located protein 3 | chr2:14123181-14125028 REVERSE LENGTH=304
3	3	3	3	3	3	3	3	3		AT2G33150.1	AT2G33150.1	AT2G33150.1 | Symbols: PKT3, PED1, KAT2 | peroxisomal 3-ketoacyl-CoA thiolase 3 | chr2:14047814-14050983 REVERSE LENGTH=462
3	3	3	3	3	3	3	3	3		AT2G33120.1;AT2G33120.2;AT1G04750.1;AT1G04750.2	AT2G33120.1;AT2G33120.2;AT1G04750.1;AT1G04750.2;AT2G32670.1;AT2G33120.3;AT3G24890.1;AT3G24890.2;AT2G33110.1	AT2G33120.1 | Symbols: SAR1, VAMP722, ATVAMP722 | synaptobrevin-related protein 1 | chr2:14043785-14045337 REVERSE LENGTH=221;AT2G33120.2 | Symbols: SAR1, VAMP722, ATVAMP722 | synaptobrevin-related protein 1 | chr2:14043785-14045337 REVERSE LENGTH=229;AT1G
3	3	3	3	3	3	3	3	3		AT2G33070.2;AT2G33070.1;AT2G33070.3	AT2G33070.2;AT2G33070.1;AT2G33070.3	AT2G33070.2 | Symbols: NSP2, ATNSP2 | nitrile specifier protein 2 | chr2:14029350-14030934 REVERSE LENGTH=471;AT2G33070.1 | Symbols: NSP2, ATNSP2 | nitrile specifier protein 2 | chr2:14029350-14030934 REVERSE LENGTH=471;AT2G33070.3 | Symbols: NSP2 | nitril
3	3	3	3	3	3	3	3	3		AT2G33040.1	AT2G33040.1	AT2G33040.1 | Symbols: ATP3 | gamma subunit of Mt ATP synthase | chr2:14018978-14021047 REVERSE LENGTH=325
1	2	2	3	3	3	1	1	3		AT2G32950.1	AT2G32950.1	AT2G32950.1 | Symbols: COP1, ATCOP1, DET340, FUS1, EMB168 | Transducin/WD40 repeat-like superfamily protein | chr2:13978000-13983282 FORWARD LENGTH=675
3	3	3	3	3	3	3	3	3		AT2G32910.1	AT2G32910.1	AT2G32910.1 | Symbols: | DCD (Development and Cell Death) domain protein | chr2:13959685-13961989 FORWARD LENGTH=691
3	3	3	3	3	3	3	3	3		AT2G32850.1;AT2G32850.2	AT2G32850.1;AT2G32850.2	AT2G32850.1 | Symbols: | Protein kinase superfamily protein | chr2:13935448-13937977 REVERSE LENGTH=650;AT2G32850.2 | Symbols: | Protein kinase superfamily protein | chr2:13935448-13937977 REVERSE LENGTH=670
3	3	3	3	3	3	3	3	3		AT2G32730.1	AT2G32730.1	AT2G32730.1 | Symbols: | 26S proteasome regulatory complex, non-ATPase subcomplex, Rpn2/Psmd1 subunit | chr2:13880189-13885464 FORWARD LENGTH=1004
3	3	3	3	3	3	3	3	3		AT2G32700.6;AT2G32700.5;AT2G32700.4;AT2G32700.3;AT2G32700.2;AT2G32700.1;AT2G32700.7	AT2G32700.6;AT2G32700.5;AT2G32700.4;AT2G32700.3;AT2G32700.2;AT2G32700.1;AT2G32700.7	AT2G32700.6 | Symbols: LUH | LEUNIG_homolog | chr2:13867235-13871844 FORWARD LENGTH=785;AT2G32700.5 | Symbols: LUH | LEUNIG_homolog | chr2:13867235-13871844 FORWARD LENGTH=787;AT2G32700.4 | Symbols: LUH | LEUNIG_homolog | chr2:13867235-13871844 FORWARD LEN
3	3	3	3	3	3	3	3	3		AT2G32120.2;AT2G32120.1	AT2G32120.2;AT2G32120.1	AT2G32120.2 | Symbols: HSP70T-2 | heat-shock protein 70T-2 | chr2:13651720-13653411 REVERSE LENGTH=563;AT2G32120.1 | Symbols: HSP70T-2 | heat-shock protein 70T-2 | chr2:13651720-13653411 REVERSE LENGTH=563
3	3	3	3	3	3	3	3	3		AT2G32080.2;AT2G32080.1	AT2G32080.2;AT2G32080.1	AT2G32080.2 | Symbols: PUR ALPHA-1 | purin-rich alpha 1 | chr2:13642716-13644036 REVERSE LENGTH=295;AT2G32080.1 | Symbols: PUR ALPHA-1 | purin-rich alpha 1 | chr2:13642716-13644036 REVERSE LENGTH=296
3	3	3	3	3	3	3	3	3		AT2G32000.2;AT2G32000.1	AT2G32000.2;AT2G32000.1	AT2G32000.2 | Symbols: | DNA topoisomerase, type IA, core | chr2:13615999-13621397 REVERSE LENGTH=838;AT2G32000.1 | Symbols: | DNA topoisomerase, type IA, core | chr2:13615999-13621563 REVERSE LENGTH=865
3	3	3	3	3	3	3	3	3		AT2G31960.2;AT2G31960.1	AT2G31960.2;AT2G31960.1	AT2G31960.2 | Symbols: GSL03 | glucan synthase-like 3 | chr2:13589545-13600066 FORWARD LENGTH=1950;AT2G31960.1 | Symbols: ATGSL03, GSL03, ATGSL3 | glucan synthase-like 3 | chr2:13589545-13600066 FORWARD LENGTH=1950
3	3	3	3	3	3	3	3	3		AT2G31890.1	AT2G31890.1	AT2G31890.1 | Symbols: ATRAP, RAP | RAP | chr2:13557100-13559715 REVERSE LENGTH=671
3	2	3	2	3	3	2	3	3		AT2G31880.1	AT2G31880.1	AT2G31880.1 | Symbols: SOBIR1, EVR | Leucine-rich repeat protein kinase family protein | chr2:13554920-13556845 FORWARD LENGTH=641
3	3	3	3	3	3	3	3	3		AT2G31810.1;AT2G31810.3;AT2G31810.2	AT2G31810.1;AT2G31810.3;AT2G31810.2	AT2G31810.1 | Symbols: | ACT domain-containing small subunit of acetolactate synthase protein | chr2:13524271-13528246 FORWARD LENGTH=491;AT2G31810.3 | Symbols: | ACT domain-containing small subunit of acetolactate synthase protein | chr2:13524271-135282
3	3	2	3	3	3	3	2	3		AT2G31800.1	AT2G31800.1;AT3G59830.1;AT2G43850.2;AT2G43850.1	AT2G31800.1 | Symbols: | Integrin-linked protein kinase family | chr2:13520605-13523646 REVERSE LENGTH=476
3	3	3	3	3	3	3	3	3		AT2G31750.1	AT2G31750.1;AT2G31790.1	AT2G31750.1 | Symbols: UGT74D1 | UDP-glucosyl transferase 74D1 | chr2:13497312-13499870 FORWARD LENGTH=456
3	3	3	3	3	3	3	3	3		AT2G31660.1	AT2G31660.1	AT2G31660.1 | Symbols: SAD2, URM9 | ARM repeat superfamily protein | chr2:13464519-13471353 FORWARD LENGTH=1040
3	3	3	3	3	3	3	3	3		AT2G31610.1	AT2G31610.1	AT2G31610.1 | Symbols: | Ribosomal protein S3 family protein | chr2:13450384-13451669 FORWARD LENGTH=250
1	3	2	2	3	3	3	2	3		AT2G31570.1	AT2G31570.1	AT2G31570.1 | Symbols: ATGPX2, GPX2 | glutathione peroxidase 2 | chr2:13438211-13439775 REVERSE LENGTH=169
3	3	3	3	3	3	3	3	3		AT2G31510.1	AT2G31510.1	AT2G31510.1 | Symbols: ARI7, ATARI7 | IBR domain-containing protein | chr2:13416991-13421170 REVERSE LENGTH=562
3	3	3	3	3	3	3	3	3		AT2G31410.1	AT2G31410.1	AT2G31410.1 | Symbols: | unknown protein;Has 1719 Blast hits to 1091 proteins in 184 species: Archae - 5;Bacteria - 24;Metazoa - 559;Fungi - 169;Plants - 192;Viruses - 1;Other Eukaryotes - 769 (source: NCBI BLink). | chr2:13392220-13392819 REVERSE
3	3	3	3	3	3	3	3	3		AT2G31390.1	AT2G31390.1;AT1G06030.1;AT1G06020.1;AT3G59480.1;AT1G50390.1	AT2G31390.1 | Symbols: | pfkB-like carbohydrate kinase family protein | chr2:13383635-13386116 REVERSE LENGTH=325
3	3	3	3	3	3	3	3	3		AT2G31060.2;AT2G31060.3;AT2G31060.1	AT2G31060.2;AT2G31060.3;AT2G31060.1	AT2G31060.2 | Symbols: | elongation factor family protein | chr2:13213496-13218544 REVERSE LENGTH=667;AT2G31060.3 | Symbols: | elongation factor family protein | chr2:13213496-13218544 REVERSE LENGTH=671;AT2G31060.1 | Symbols: | elongation factor family
3	3	3	3	3	3	3	3	3		AT2G30970.2;AT2G30970.1	AT2G30970.2;AT2G30970.1	AT2G30970.2 | Symbols: ASP1 | aspartate aminotransferase 1 | chr2:13179012-13181686 FORWARD LENGTH=430;AT2G30970.1 | Symbols: ASP1 | aspartate aminotransferase 1 | chr2:13179012-13181686 FORWARD LENGTH=430
3	3	3	3	3	3	3	3	3		AT2G30950.1	AT2G30950.1	AT2G30950.1 | Symbols: VAR2, FTSH2 | FtsH extracellular protease family | chr2:13174692-13177064 FORWARD LENGTH=695
3	3	3	3	3	3	3	3	3		AT2G30860.1;AT2G30860.2	AT2G30860.1;AT2G30860.2	AT2G30860.1 | Symbols: ATGSTF9, GLUTTR, ATGSTF7, GSTF9 | glutathione S-transferase PHI 9 | chr2:13139132-13140057 FORWARD LENGTH=215;AT2G30860.2 | Symbols: ATGSTF9, GLUTTR, ATGSTF7, GSTF9 | glutathione S-transferase PHI 9 | chr2:13139132-13140079 FORWARD L
3	3	3	3	3	3	3	3	3		AT2G30620.1;AT2G30620.2	AT2G30620.1;AT2G30620.2	AT2G30620.1 | Symbols: | winged-helix DNA-binding transcription factor family protein | chr2:13045360-13046267 FORWARD LENGTH=273;AT2G30620.2 | Symbols: | winged-helix DNA-binding transcription factor family protein | chr2:13045360-13046267 FORWARD LENGT
2	3	2	3	2	3	3	2	2		AT2G30520.3;AT2G30520.2;AT2G30520.1	AT2G30520.3;AT2G30520.2;AT2G30520.1;AT3G49970.1	AT2G30520.3 | Symbols: RPT2 | Phototropic-responsive NPH3 family protein | chr2:13002920-13005153 REVERSE LENGTH=545;AT2G30520.2 | Symbols: RPT2 | Phototropic-responsive NPH3 family protein | chr2:13002920-13005153 REVERSE LENGTH=545;AT2G30520.1 | Symbols:
3	3	3	3	3	3	3	3	3		AT2G30490.1	AT2G30490.1	AT2G30490.1 | Symbols: ATC4H, C4H, CYP73A5, REF3 | cinnamate-4-hydroxylase | chr2:12993861-12995683 REVERSE LENGTH=505
3	3	3	3	3	3	3	3	3		AT2G30200.1;AT2G30200.2	AT2G30200.1;AT2G30200.2	AT2G30200.1 | Symbols: | catalytics;transferases;[acyl-carrier-protein] S-malonyltransferases;binding | chr2:12883162-12885482 REVERSE LENGTH=393;AT2G30200.2 | Symbols: | catalytics;transferases;[acyl-carrier-protein] S-malonyltransferases;binding | chr2
3	3	3	3	3	3	3	3	3		AT2G30110.1	AT2G30110.1	AT2G30110.1 | Symbols: ATUBA1, MOS5, UBA1 | ubiquitin-activating enzyme 1 | chr2:12852632-12857369 REVERSE LENGTH=1080
3	3	3	3	3	3	3	3	3		AT2G30050.1	AT2G30050.1	AT2G30050.1 | Symbols: | transducin family protein / WD-40 repeat family protein | chr2:12825540-12826448 FORWARD LENGTH=302
3	3	3	3	3	3	3	3	3		AT2G29960.2;AT2G29960.1	AT2G29960.2;AT2G29960.1	AT2G29960.2 | Symbols: CYP5, ATCYP5, CYP19-4 | cyclophilin 5 | chr2:12769183-12770528 REVERSE LENGTH=191;AT2G29960.1 | Symbols: CYP5, ATCYP5, CYP19-4 | cyclophilin 5 | chr2:12769183-12770528 REVERSE LENGTH=201
3	3	3	3	3	3	3	3	3		AT2G29760.1	AT2G29760.1	AT2G29760.1 | Symbols: OTP81 | Tetratricopeptide repeat (TPR)-like superfamily protein | chr2:12712884-12715100 FORWARD LENGTH=738
3	3	3	3	3	3	3	3	3		AT2G29550.1	AT2G29550.1	AT2G29550.1 | Symbols: TUB7 | tubulin beta-7 chain | chr2:12644258-12645932 REVERSE LENGTH=449
3	3	3	2	3	3	3	3	3		AT2G29210.1	AT2G29210.1	AT2G29210.1 | Symbols: | splicing factor PWI domain-containing protein | chr2:12558156-12562168 FORWARD LENGTH=878
3	3	3	3	3	3	3	3	3		AT2G29190.2;AT2G29190.1	AT2G29190.2;AT2G29190.1	AT2G29190.2 | Symbols: PUM2 | pumilio 2 | chr2:12544260-12548071 REVERSE LENGTH=972;AT2G29190.1 | Symbols: APUM2, PUM2 | pumilio 2 | chr2:12544260-12548071 REVERSE LENGTH=972
3	3	3	3	3	3	3	3	3		AT2G29080.1;AT1G07510.1	AT2G29080.1;AT1G07510.1	AT2G29080.1 | Symbols: ftsh3 | FTSH protease 3 | chr2:12489911-12492999 REVERSE LENGTH=809;AT1G07510.1 | Symbols: ftsh10 | FTSH protease 10 | chr1:2305689-2309380 FORWARD LENGTH=813
3	3	3	3	3	3	3	3	3		AT2G28910.1	AT2G28910.1	AT2G28910.1 | Symbols: CXIP4 | CAX interacting protein 4 | chr2:12415992-12416990 REVERSE LENGTH=332
3	3	3	3	3	3	3	3	3		AT2G28900.1	AT2G28900.1	AT2G28900.1 | Symbols: OEP16, ATOEP16-L, ATOEP16-1, OEP16-1 | outer plastid envelope protein 16-1 | chr2:12414423-12415459 REVERSE LENGTH=148
3	3	3	3	3	3	3	3	3		AT2G28790.1	AT2G28790.1	AT2G28790.1 | Symbols: | Pathogenesis-related thaumatin superfamily protein | chr2:12354664-12355413 REVERSE LENGTH=249
3	3	3	3	3	3	3	3	3		AT2G28600.1	AT2G28600.1	AT2G28600.1 | Symbols: | P-loop containing nucleoside triphosphate hydrolases superfamily protein | chr2:12251845-12254672 FORWARD LENGTH=502
3	3	3	3	3	3	3	3	3		AT2G28550.2;AT2G28550.1;AT2G28550.3	AT2G28550.2;AT2G28550.1;AT2G28550.3;AT5G67180.1;AT4G36920.2;AT4G36920.1;AT5G60120.1;AT5G60120.2;AT3G54990.2;AT2G39250.1;AT3G54990.1	AT2G28550.2 | Symbols: RAP2.7, TOE1 | related to AP2.7 | chr2:12226444-12228251 REVERSE LENGTH=381;AT2G28550.1 | Symbols: RAP2.7, TOE1 | related to AP2.7 | chr2:12226168-12228251 REVERSE LENGTH=449;AT2G28550.3 | Symbols: RAP2.7 | related to AP2.7 | chr2:12
3	3	3	3	3	3	3	3	3		AT2G28490.1	AT2G28490.1	AT2G28490.1 | Symbols: | RmlC-like cupins superfamily protein | chr2:12178812-12180983 REVERSE LENGTH=511
2	3	3	3	3	3	3	3	3		AT2G28290.2;AT2G28290.3;AT2G28290.1	AT2G28290.2;AT2G28290.3;AT2G28290.1	AT2G28290.2 | Symbols: SYD, CHR3 | P-loop containing nucleoside triphosphate hydrolases superfamily protein | chr2:12056771-12072950 FORWARD LENGTH=3529;AT2G28290.3 | Symbols: SYD, CHR3 | P-loop containing nucleoside triphosphate hydrolases superfamily pro
3	3	3	3	3	3	3	3	3		AT2G28000.1	AT2G28000.1	AT2G28000.1 | Symbols: CPN60A, CH-CPN60A, SLP | chaperonin-60alpha | chr2:11926603-11929184 FORWARD LENGTH=586
0	3	3	3	2	3	3	2	3		AT2G27730.1	AT2G27730.1	AT2G27730.1 | Symbols: | copper ion binding | chr2:11820056-11820867 REVERSE LENGTH=113
3	3	3	3	3	3	3	3	3		AT2G27600.1	AT2G27600.1	AT2G27600.1 | Symbols: SKD1, VPS4, ATSKD1 | AAA-type ATPase family protein | chr2:11781226-11783730 FORWARD LENGTH=435
3	3	3	3	3	3	3	3	3		AT2G27530.2;AT2G27530.1	AT2G27530.2;AT2G27530.1	AT2G27530.2 | Symbols: PGY1 | Ribosomal protein L1p/L10e family | chr2:11763443-11764570 REVERSE LENGTH=216;AT2G27530.1 | Symbols: PGY1 | Ribosomal protein L1p/L10e family | chr2:11763443-11764570 REVERSE LENGTH=216
3	3	3	3	3	3	3	2	3		AT2G27110.3;AT2G27110.2;AT2G27110.1	AT2G27110.3;AT2G27110.2;AT2G27110.1	AT2G27110.3 | Symbols: FRS3 | FAR1-related sequence 3 | chr2:11576969-11580259 REVERSE LENGTH=706;AT2G27110.2 | Symbols: FRS3 | FAR1-related sequence 3 | chr2:11576969-11580405 REVERSE LENGTH=851;AT2G27110.1 | Symbols: FRS3 | FAR1-related sequence 3 | chr2
3	3	3	3	3	3	3	3	3		AT2G27100.1	AT2G27100.1	AT2G27100.1 | Symbols: SE | C2H2 zinc-finger protein SERRATE (SE) | chr2:11572587-11576357 FORWARD LENGTH=720
3	3	3	3	3	3	3	3	3		AT2G27040.2;AT2G27040.1	AT2G27040.2;AT2G27040.1;AT5G21150.1	AT2G27040.2 | Symbols: AGO4 | Argonaute family protein | chr2:11536795-11541503 REVERSE LENGTH=924;AT2G27040.1 | Symbols: AGO4, OCP11 | Argonaute family protein | chr2:11536795-11541503 REVERSE LENGTH=924
3	3	3	3	3	3	3	3	3		AT2G27020.1	AT2G27020.1	AT2G27020.1 | Symbols: PAG1 | 20S proteasome alpha subunit G1 | chr2:11528515-11530858 REVERSE LENGTH=249
3	3	3	3	3	3	2	3	3		AT2G26930.1	AT2G26930.1	AT2G26930.1 | Symbols: ATCDPMEK, PDE277, ISPE, CDPMEK | 4-(cytidine 5-phospho)-2-C-methyl-D-erithritol kinase | chr2:11491829-11494229 REVERSE LENGTH=383
3	3	3	3	3	3	3	3	3		AT2G26780.1	AT2G26780.1	AT2G26780.1 | Symbols: | ARM repeat superfamily protein | chr2:11410125-11423598 FORWARD LENGTH=1826
0	1	2	2	3	3	3	3	3		AT2G26460.1	AT2G26460.1	AT2G26460.1 | Symbols: SMU2 | RED family protein | chr2:11255049-11258913 REVERSE LENGTH=585
3	3	3	3	3	3	3	3	3		AT2G26250.1	AT2G26250.1	AT2G26250.1 | Symbols: FDH, KCS10 | 3-ketoacyl-CoA synthase 10 | chr2:11170799-11173059 REVERSE LENGTH=550
3	3	3	3	3	3	3	3	3		AT2G26080.1	AT2G26080.1	AT2G26080.1 | Symbols: AtGLDP2, GLDP2 | glycine decarboxylase P-protein 2 | chr2:11109330-11113786 REVERSE LENGTH=1044
3	3	3	3	3	3	3	3	3		AT2G25970.1	AT2G25970.1	AT2G25970.1 | Symbols: | KH domain-containing protein | chr2:11071844-11075604 REVERSE LENGTH=632
2	3	3	3	3	3	3	3	3		AT2G25870.1	AT2G25870.1	AT2G25870.1 | Symbols: | haloacid dehalogenase-like hydrolase family protein | chr2:11031159-11034302 FORWARD LENGTH=584
3	3	3	3	3	3	3	3	3		AT2G25840.3;AT2G25840.1;AT2G25840.2	AT2G25840.3;AT2G25840.1;AT2G25840.2	AT2G25840.3 | Symbols: OVA4 | Nucleotidylyl transferase superfamily protein | chr2:11021924-11025158 FORWARD LENGTH=396;AT2G25840.1 | Symbols: OVA4 | Nucleotidylyl transferase superfamily protein | chr2:11021924-11025158 FORWARD LENGTH=408;AT2G25840.2 | Sy
3	3	3	3	3	3	3	3	3		AT2G25800.1	AT2G25800.1	AT2G25800.1 | Symbols: | Protein of unknown function (DUF810) | chr2:11006138-11009728 REVERSE LENGTH=987
3	3	3	3	2	3	3	2	3		AT2G25730.2;AT2G25730.1	AT2G25730.2;AT2G25730.1	AT2G25730.2 | Symbols: | unknown protein;LOCATED IN: cellular_component unknown;EXPRESSED IN: 23 plant structures;EXPRESSED DURING: 14 growth stages. | chr2:10956751-10972729 REVERSE LENGTH=2487;AT2G25730.1 | Symbols: | unknown protein;Has 157 Blast
3	3	3	3	3	3	3	3	3		AT2G25710.2;AT2G25710.1	AT2G25710.2;AT2G25710.1	AT2G25710.2 | Symbols: HCS1 | holocarboxylase synthase 1 | chr2:10952719-10955061 FORWARD LENGTH=367;AT2G25710.1 | Symbols: HCS1 | holocarboxylase synthase 1 | chr2:10952719-10955061 FORWARD LENGTH=367
3	3	3	3	3	3	3	3	3		AT2G25450.1	AT2G25450.1	AT2G25450.1 | Symbols: | 2-oxoglutarate (2OG) and Fe(II)-dependent oxygenase superfamily protein | chr2:10830286-10831563 REVERSE LENGTH=359
2	3	3	3	2	3	3	2	3		AT2G25320.1	AT2G25320.1;AT2G25330.1	AT2G25320.1 | Symbols: | TRAF-like family protein | chr2:10781951-10788065 REVERSE LENGTH=1673
2	3	3	3	3	3	3	3	3		AT2G25280.1	AT2G25280.1	AT2G25280.1 | Symbols: | CONTAINS InterPro DOMAIN/s: UPF0103/Mediator of ErbB2-driven cell motility (Memo), related (InterPro:IPR002737);Has 1074 Blast hits to 1072 proteins in 474 species: Archae - 213;Bacteria - 366;Metazoa - 159;Fungi - 135;Plants
3	3	3	3	3	3	3	3	3		AT2G25210.1;AT4G31985.1	AT2G25210.1;AT4G31985.1	AT2G25210.1 | Symbols: | Ribosomal protein L39 family protein | chr2:10740157-10740379 FORWARD LENGTH=44;AT4G31985.1 | Symbols: | Ribosomal protein L39 family protein | chr4:15469931-15470366 FORWARD LENGTH=51
3	3	3	3	3	3	3	3	3		AT2G25170.1	AT2G25170.1;AT4G31900.2;AT4G31900.1	AT2G25170.1 | Symbols: PKL, GYM, CHD3, CHR6, SSL2 | chromatin remodeling factor CHD3 (PICKLE) | chr2:10714411-10723763 FORWARD LENGTH=1384
0	0	1	2	2	3	2	3	3		AT2G25070.1	AT2G25070.1	AT2G25070.1 | Symbols: | Protein phosphatase 2C family protein | chr2:10663517-10665366 REVERSE LENGTH=355
3	3	3	3	3	3	3	3	3		AT2G24990.1;AT5G37350.1	AT2G24990.1;AT5G37350.1;AT5G37350.2	AT2G24990.1 | Symbols: | Serine/threonine-protein kinase Rio1 | chr2:10625285-10628299 FORWARD LENGTH=537;AT5G37350.1 | Symbols: | Serine/threonine-protein kinase Rio1 | chr5:14793037-14795828 FORWARD LENGTH=531
3	3	2	2	3	3	2	3	3		AT2G24820.1	AT2G24820.1	AT2G24820.1 | Symbols: TIC55-II | translocon at the inner envelope membrane of chloroplasts 55-II | chr2:10575038-10576829 FORWARD LENGTH=539
[truncated: 737 more rows]

## Sheet: FAMA-TbID enriched
Table 2: Proteins significantly enriched in FAMA-TbID vs. WT and FAMAnucTbID samples (FAMA interaction candidates; Figure 5) and in FAMAnucTbID vs. WT
[truncated: 408 more rows]
[truncated: 6 more columns]

[truncated: 3 more sheets: enrichement over time, FAMA complex candidates, FAMA AP-MS]
