# Supplementary material for: Proximity labeling of protein complexes and cell-type-specific organellar proteomes in Arabidopsis enabled by TurboID
Source: eLife. 2019 Sep 19;8:e47864. doi: 10.7554/eLife.47864 (PMC6791687; doi:10.7554/eLife.47864)
Supplement: Supplementary file 3. — Table 1, ‘identified proteins’: Proteins identified in the 'nuclear proteome' experiment; Table 2, ‘enriched with UBQnucTbID’: Proteins significantly enriched in UBQnucTbID vs. WT samples; Table 3, ‘enriched with FAMAnucTbID’: Proteins significantly enriched in FAMAnucTbID vs. WT and FAMAnucTbID vs. UBQnucTbID samples; Table 4, ‘published nuclear proteomes’: Proteins found in proteomics studies of purified nuclei or sub-nuclear compartments by mass spectrometry or in localization studies with fluorescent protein fusions; Table 5, ‘localization prediction’: Protein localization data used for pie charts in Figure 6; Table 6, ‘published GC proteome’: Proteins found in published guard cell proteomics experiments; Table 7, ‘GO term enrichment’: Enriched GO terms of nuclear proteins in Figure 6 and supplements; Table 8, ‘nuclear compartments’: Selected marker proteins and protein classes for different nuclear compartments and domains identified in the UBQnucTbID and FAMAnucTbID dataset [file elife-47864-supp3.xlsx]

## Sheet: summary
table	tab name	description
Table 1	identified proteins	Proteins identified in the 'nuclear proteome' experiment
Table 2	enriched with UBQnucTbID	Proteins significantly enriched in UBQnucTbID vs. WT samples
Table 3	enriched with FAMAnucTbID	Proteins significantly enriched in FAMAnucTbID vs. WT samples (and enriched in FAMAnucTbID vs. UBQnucTbID samples)
Table 4	published nuclear proteomes	Proteins found in proteomics studies of purified nuclei or sub-nuclear compartments by mass spectrometry (MS) or in localization studies with fluorescent protein fusions (FP, data from SUBA4; as of 02-2019)
Table 5	localization prediction	Protein localization data used for pie charts in Figure 6
Table 6	published GC proteome	Proteins found in published guard cell proteomics experiments
Table 7	GO term enrichment	Enriched GO terms of nuclear proteins in Figure 6 and Figure 6 - figure supplement 4 and in Tables 2 and 3
Table 8	nuclear compartments	Selected marker proteins and protein classes for different nuclear compartments and domains identified in the UBQnucTbID and FAMAnucTbID dataset

## Sheet: identified proteins
Table 1: Proteins identified in the 'nuclear proteome' experiment
3,176 proteins that were found in at least 3 replicates of one sample by MS/MS identification or by matching
# of repliates identified in			known endogenous biotinylation target	Major protein IDs	Protein IDs	FASTA header
WT (3h)	UQBnucTbID (3h)	FAMAnucTbID (3h)
3	3	3	ACC1	AT1G36160.2;AT1G36160.1	AT1G36160.2;AT1G36160.1	AT1G36160.2 | Symbols: ACC1 | acetyl-CoA carboxylase 1 | chr1:13534196-13543773 FORWARD LENGTH=2254;AT1G36160.1 | Symbols: ACC1, AT-ACC1, EMB22, GK, PAS3 | acetyl-CoA carboxylase 1 | chr1:13534196-13543773 FORWARD LENGTH=2254
3	3	3	ACC2	AT1G36180.1	AT1G36180.1;AT1G36180.2	AT1G36180.1 | Symbols: ACC2 | acetyl-CoA carboxylase 2 | chr1:13546047-13558339 FORWARD LENGTH=2355
3	3	3	ACCD	ATCG00500.1	ATCG00500.1	ATCG00500.1 | Symbols: ACCD | acetyl-CoA carboxylase carboxyl transferase subunit beta | chrC:57075-58541 FORWARD LENGTH=488
3	3	3	CAC1A	AT5G16390.1;AT5G16390.2	AT5G16390.1;AT5G16390.2	AT5G16390.1 | Symbols: CAC1, CAC1A, BCCP, BCCP1 | chloroplastic acetylcoenzyme A carboxylase 1 | chr5:5361098-5363020 REVERSE LENGTH=280;AT5G16390.2 | Symbols: CAC1, CAC1A, BCCP, BCCP1, CAC1-A, BCCP-1 | chloroplastic acetylcoenzyme A carboxylase 1 | chr5:5
3	3	3	CAC1B	AT5G15530.1	AT5G15530.1	AT5G15530.1 | Symbols: BCCP2, CAC1-B | biotin carboxyl carrier protein 2 | chr5:5038955-5040437 FORWARD LENGTH=255
3	3	3	CAC2	AT5G35360.1;AT5G35360.3;AT5G35360.2	AT5G35360.1;AT5G35360.3;AT5G35360.2	AT5G35360.1 | Symbols: CAC2 | acetyl Co-enzyme a carboxylase biotin carboxylase subunit | chr5:13584300-13588268 FORWARD LENGTH=537;AT5G35360.3 | Symbols: CAC2 | acetyl Co-enzyme a carboxylase biotin carboxylase subunit | chr5:13584300-13588163 FORWARD LEN
3	3	3	MCCA	AT1G03090.2;AT1G03090.1	AT1G03090.2;AT1G03090.1	AT1G03090.2 | Symbols: MCCA | methylcrotonyl-CoA carboxylase alpha chain, mitochondrial / 3-methylcrotonyl-CoA carboxylase 1 (MCCA) | chr1:739715-743819 FORWARD LENGTH=734;AT1G03090.1 | Symbols: MCCA | methylcrotonyl-CoA carboxylase alpha chain, mitochondr
3	3	3	MCCB	AT4G34030.1	AT4G34030.1	AT4G34030.1 | Symbols: MCCB | 3-methylcrotonyl-CoA carboxylase | chr4:16301298-16303949 FORWARD LENGTH=587
3	2	3		ATMG01270.1;AT2G07696.1	ATMG01270.1;AT2G07696.1	ATMG01270.1 | Symbols: RPS7 | mitochondrial ribosomal protein S7 | chrM:314627-315073 FORWARD LENGTH=148;AT2G07696.1 | Symbols: | Ribosomal protein S7p/S5e family protein | chr2:3351340-3351786 REVERSE LENGTH=148
3	3	3		ATMG00640.1	ATMG00640.1;AT3G47180.1	ATMG00640.1 | Symbols: ORF25 | hydrogen ion transporting ATP synthases, rotational mechanism;zinc ion binding | chrM:188084-188662 REVERSE LENGTH=192
3	3	3		ATMG00560.1;AT2G07715.1	ATMG00560.1;AT2G07715.1	ATMG00560.1 | Symbols: RPL2 | Nucleic acid-binding, OB-fold-like protein | chrM:154744-157345 FORWARD LENGTH=349;AT2G07715.1 | Symbols: | Nucleic acid-binding, OB-fold-like protein | chr2:3411180-3412694 FORWARD LENGTH=389
3	3	3		ATMG00510.1	ATMG00510.1	ATMG00510.1 | Symbols: NAD7 | NADH dehydrogenase subunit 7 | chrM:132071-138153 FORWARD LENGTH=394
3	3	3		ATMG00480.1;AT2G07707.1	ATMG00480.1;AT2G07707.1	ATMG00480.1 | Symbols: ORFB, ATP8 | Plant mitochondrial ATPase, F0 complex, subunit 8 protein | chrM:129909-130385 FORWARD LENGTH=158;AT2G07707.1 | Symbols: | Plant mitochondrial ATPase, F0 complex, subunit 8 protein | chr2:3386292-3386768 FORWARD LENGTH=
3	3	3		ATMG00290.1;AT2G07734.1	ATMG00290.1;AT2G07734.1	ATMG00290.1 | Symbols: RPS4 | mitochondrial ribosomal protein S4 | chrM:82028-83116 REVERSE LENGTH=362;AT2G07734.1 | Symbols: | Alpha-L RNA-binding motif/Ribosomal protein S4 family protein | chr2:3472604-3473692 REVERSE LENGTH=362
3	3	3		ATMG00160.1	ATMG00160.1	ATMG00160.1 | Symbols: COX2 | cytochrome oxidase 2 | chrM:40502-42628 REVERSE LENGTH=260
3	2	3		ATMG00090.1	ATMG00090.1	ATMG00090.1 | Symbols: | structural constituent of ribosome;protein binding | chrM:25482-28733 REVERSE LENGTH=556
3	3	3		ATMG00070.1	ATMG00070.1	ATMG00070.1 | Symbols: NAD9 | NADH dehydrogenase subunit 9 | chrM:23663-24235 REVERSE LENGTH=190
3	3	3		ATCG01310.1;ATCG00830.1	ATCG01310.1;ATCG00830.1	ATCG01310.1 | Symbols: RPL2.2 | ribosomal protein L2 | chrC:152806-154312 FORWARD LENGTH=274;ATCG00830.1 | Symbols: RPL2.1 | ribosomal protein L2 | chrC:84337-85843 REVERSE LENGTH=274
3	3	3		ATCG01300.1;ATCG00840.1	ATCG01300.1;ATCG00840.1	ATCG01300.1 | Symbols: RPL23.2 | ribosomal protein L23 | chrC:152506-152787 FORWARD LENGTH=93;ATCG00840.1 | Symbols: RPL23.1, RPL23 | ribosomal protein L23.1 | chrC:85862-86143 REVERSE LENGTH=93
3	3	3		ATCG01280.1;ATCG00860.1	ATCG01280.1;ATCG00860.1	ATCG01280.1 | Symbols: YCF2.2 | Chloroplast Ycf2;ATPase, AAA type, core | chrC:145291-152175 REVERSE LENGTH=2294;ATCG00860.1 | Symbols: YCF2.1 | Chloroplast Ycf2;ATPase, AAA type, core | chrC:86474-93358 FORWARD LENGTH=2294
3	3	3		ATCG01240.1;ATCG00900.1	ATCG01240.1;ATCG00900.1	ATCG01240.1 | Symbols: RPS7.2 | ribosomal protein S7 | chrC:140704-141171 FORWARD LENGTH=155;ATCG00900.1 | Symbols: RPS7.1, RPS7 | Ribosomal protein S7p/S5e family protein | chrC:97478-97945 REVERSE LENGTH=155
3	3	3		ATCG01230.1;ATCG00905.1;ATCG00065.1	ATCG01230.1;ATCG00905.1;ATCG00065.1	ATCG01230.1 | Symbols: RPS12B, RPS12 | ribosomal protein S12B | chrC:139856-140650 FORWARD LENGTH=123;ATCG00905.1 | Symbols: RPS12C, RPS12 | ribosomal protein S12C | chrC:97999-98793 REVERSE LENGTH=123;ATCG00065.1 | Symbols: RPS12A, RPS12 | ribosomal prote
3	3	3		ATCG01130.1	ATCG01130.1;ATCG01000.1	ATCG01130.1 | Symbols: YCF1.2 | Ycf1 protein | chrC:123884-129244 REVERSE LENGTH=1786
3	3	3		ATCG01120.1	ATCG01120.1	ATCG01120.1 | Symbols: RPS15 | chloroplast ribosomal protein S15 | chrC:123296-123562 REVERSE LENGTH=88
3	3	3		ATCG01110.1	ATCG01110.1	ATCG01110.1 | Symbols: NDHH | NAD(P)H dehydrogenase subunit H | chrC:122011-123192 REVERSE LENGTH=393
3	3	3		ATCG01090.1	ATCG01090.1	ATCG01090.1 | Symbols: NDHI | NADPH dehydrogenases | chrC:119244-119762 REVERSE LENGTH=172
3	3	3		ATCG01060.1	ATCG01060.1	ATCG01060.1 | Symbols: PSAC | iron-sulfur cluster binding;electron carriers;4 iron, 4 sulfur cluster binding | chrC:117318-117563 REVERSE LENGTH=81
3	3	3		ATCG01020.1	ATCG01020.1	ATCG01020.1 | Symbols: RPL32 | ribosomal protein L32 | chrC:113449-113607 FORWARD LENGTH=52
3	3	3		ATCG00820.1	ATCG00820.1	ATCG00820.1 | Symbols: RPS19 | ribosomal protein S19 | chrC:84005-84283 REVERSE LENGTH=92
3	3	3		ATCG00810.1	ATCG00810.1	ATCG00810.1 | Symbols: RPL22 | ribosomal protein L22 | chrC:83467-83949 REVERSE LENGTH=160
3	3	3		ATCG00800.1	ATCG00800.1	ATCG00800.1 | Symbols: | structural constituent of ribosome | chrC:82826-83482 REVERSE LENGTH=218
3	3	3		ATCG00790.1	ATCG00790.1;AT2G28830.1	ATCG00790.1 | Symbols: RPL16 | ribosomal protein L16 | chrC:81189-82652 REVERSE LENGTH=135
3	3	3		ATCG00780.1	ATCG00780.1	ATCG00780.1 | Symbols: RPL14 | ribosomal protein L14 | chrC:80696-81064 REVERSE LENGTH=122
3	3	3		ATCG00770.1	ATCG00770.1	ATCG00770.1 | Symbols: RPS8 | ribosomal protein S8 | chrC:80068-80472 REVERSE LENGTH=134
3	3	3		ATCG00750.1	ATCG00750.1	ATCG00750.1 | Symbols: RPS11 | ribosomal protein S11 | chrC:78960-79376 REVERSE LENGTH=138
3	3	3		ATCG00740.1	ATCG00740.1	ATCG00740.1 | Symbols: RPOA | RNA polymerase subunit alpha | chrC:77901-78890 REVERSE LENGTH=329
3	3	3		ATCG00680.1	ATCG00680.1	ATCG00680.1 | Symbols: PSBB | photosystem II reaction center protein B | chrC:72371-73897 FORWARD LENGTH=508
3	3	3		ATCG00670.1	ATCG00670.1	ATCG00670.1 | Symbols: CLPP1, PCLPP | plastid-encoded CLP P | chrC:69910-71882 REVERSE LENGTH=196
3	3	3		ATCG00660.1	ATCG00660.1	ATCG00660.1 | Symbols: RPL20 | ribosomal protein L20 | chrC:68512-68865 REVERSE LENGTH=117
3	3	3		ATCG00650.1	ATCG00650.1	ATCG00650.1 | Symbols: RPS18 | ribosomal protein S18 | chrC:67917-68222 FORWARD LENGTH=101
3	3	3		ATCG00640.1	ATCG00640.1	ATCG00640.1 | Symbols: RPL33 | ribosomal protein L33 | chrC:67488-67688 FORWARD LENGTH=66
3	3	3		ATCG00520.1	ATCG00520.1	ATCG00520.1 | Symbols: YCF4 | unfolded protein binding | chrC:59772-60326 FORWARD LENGTH=184
3	3	3		ATCG00490.1	ATCG00490.1;ATMG00280.1;AT2G07732.1	ATCG00490.1 | Symbols: RBCL | ribulose-bisphosphate carboxylases | chrC:54958-56397 FORWARD LENGTH=479
3	3	3		ATCG00480.1	ATCG00480.1	ATCG00480.1 | Symbols: ATPB, PB | ATP synthase subunit beta | chrC:52660-54156 REVERSE LENGTH=498
3	3	3		ATCG00470.1	ATCG00470.1	ATCG00470.1 | Symbols: ATPE | ATP synthase epsilon chain | chrC:52265-52663 REVERSE LENGTH=132
3	3	3		ATCG00380.1	ATCG00380.1	ATCG00380.1 | Symbols: RPS4 | chloroplast ribosomal protein S4 | chrC:45223-45828 REVERSE LENGTH=201
3	3	3		ATCG00350.1	ATCG00350.1	ATCG00350.1 | Symbols: PSAA | Photosystem I, PsaA/PsaB protein | chrC:39605-41857 REVERSE LENGTH=750
3	3	3		ATCG00340.1	ATCG00340.1	ATCG00340.1 | Symbols: PSAB | Photosystem I, PsaA/PsaB protein | chrC:37375-39579 REVERSE LENGTH=734
3	3	3		ATCG00330.1	ATCG00330.1	ATCG00330.1 | Symbols: RPS14 | chloroplast ribosomal protein S14 | chrC:36938-37240 REVERSE LENGTH=100
3	3	3		ATCG00280.1	ATCG00280.1	ATCG00280.1 | Symbols: PSBC | photosystem II reaction center protein C | chrC:33720-35141 FORWARD LENGTH=473
3	3	3		ATCG00270.1	ATCG00270.1	ATCG00270.1 | Symbols: PSBD | photosystem II reaction center protein D | chrC:32711-33772 FORWARD LENGTH=353
3	3	3		ATCG00190.1	ATCG00190.1	ATCG00190.1 | Symbols: RPOB | RNA polymerase subunit beta | chrC:23111-26329 REVERSE LENGTH=1072
3	3	3		ATCG00180.1	ATCG00180.1	ATCG00180.1 | Symbols: RPOC1 | DNA-directed RNA polymerase family protein | chrC:20251-23084 REVERSE LENGTH=680
3	3	3		ATCG00170.1	ATCG00170.1	ATCG00170.1 | Symbols: RPOC2 | DNA-directed RNA polymerase family protein | chrC:15938-20068 REVERSE LENGTH=1376
3	3	3		ATCG00160.1	ATCG00160.1	ATCG00160.1 | Symbols: RPS2 | ribosomal protein S2 | chrC:15013-15723 REVERSE LENGTH=236
3	3	3		ATCG00130.1	ATCG00130.1	ATCG00130.1 | Symbols: ATPF | ATPase, F0 complex, subunit B/B, bacterial/chloroplast | chrC:11529-12798 REVERSE LENGTH=184
3	3	3		ATCG00120.1	ATCG00120.1	ATCG00120.1 | Symbols: ATPA | ATP synthase subunit alpha | chrC:9938-11461 REVERSE LENGTH=507
3	3	3		ATCG00020.1	ATCG00020.1	ATCG00020.1 | Symbols: PSBA | photosystem II reaction center protein A | chrC:383-1444 REVERSE LENGTH=353
3	3	3		AT5G67560.1	AT5G67560.1;AT3G49860.1	AT5G67560.1 | Symbols: ATARLA1D, ARLA1D | ADP-ribosylation factor-like A1D | chr5:26950579-26951913 FORWARD LENGTH=184
3	3	3		AT5G67530.1	AT5G67530.1	AT5G67530.1 | Symbols: ATPUB49, PUB49 | plant U-box 49 | chr5:26941260-26943878 FORWARD LENGTH=595
3	3	3		AT5G67510.1	AT5G67510.1	AT5G67510.1 | Symbols: | Translation protein SH3-like family protein | chr5:26937970-26938410 REVERSE LENGTH=146
3	3	3		AT5G67500.1;AT5G67500.2	AT5G67500.1;AT5G67500.2	AT5G67500.1 | Symbols: VDAC2, ATVDAC2 | voltage dependent anion channel 2 | chr5:26935223-26937123 FORWARD LENGTH=276;AT5G67500.2 | Symbols: VDAC2 | voltage dependent anion channel 2 | chr5:26935223-26937123 FORWARD LENGTH=303
3	3	3		AT5G67380.1;AT5G67380.2	AT5G67380.1;AT5G67380.2	AT5G67380.1 | Symbols: CKA1, ATCKA1 | casein kinase alpha 1 | chr5:26881156-26883383 REVERSE LENGTH=409;AT5G67380.2 | Symbols: CKA1, ATCKA1 | casein kinase alpha 1 | chr5:26881156-26883383 REVERSE LENGTH=376
3	3	3		AT5G67320.1	AT5G67320.1	AT5G67320.1 | Symbols: HOS15 | WD-40 repeat family protein | chr5:26857268-26860974 FORWARD LENGTH=613
3	3	3		AT5G67240.1;AT5G67240.2	AT5G67240.1;AT5G67240.2	AT5G67240.1 | Symbols: SDN3 | small RNA degrading nuclease 3 | chr5:26824454-26828098 REVERSE LENGTH=782;AT5G67240.2 | Symbols: SDN3 | small RNA degrading nuclease 3 | chr5:26824454-26828098 REVERSE LENGTH=762
2	3	3		AT5G67100.1	AT5G67100.1	AT5G67100.1 | Symbols: ICU2 | DNA-directed DNA polymerases | chr5:26776994-26785104 FORWARD LENGTH=1524
3	3	3		AT5G67030.1;AT5G67030.2	AT5G67030.1;AT5G67030.2	AT5G67030.1 | Symbols: ABA1, LOS6, NPQ2, ATABA1, ZEP, IBS3, ATZEP | zeaxanthin epoxidase (ZEP) (ABA1) | chr5:26753745-26757090 REVERSE LENGTH=667;AT5G67030.2 | Symbols: ABA1, LOS6, NPQ2, ATABA1, ZEP, IBS3, ATZEP | zeaxanthin epoxidase (ZEP) (ABA1) | chr5:2
3	3	3		AT5G66760.1	AT5G66760.1;AT2G18450.1	AT5G66760.1 | Symbols: SDH1-1 | succinate dehydrogenase 1-1 | chr5:26653776-26657224 FORWARD LENGTH=634
3	3	3		AT5G66680.1	AT5G66680.1	AT5G66680.1 | Symbols: DGL1 | dolichyl-diphosphooligosaccharide-protein glycosyltransferase 48kDa subunit family protein | chr5:26617840-26620581 REVERSE LENGTH=437
3	3	3		AT5G66570.1	AT5G66570.1	AT5G66570.1 | Symbols: PSBO-1, OEE1, OEE33, OE33, PSBO1, MSP-1 | PS II oxygen-evolving complex 1 | chr5:26568744-26570124 FORWARD LENGTH=332
1	3	2		AT5G66540.1	AT5G66540.1	AT5G66540.1 | Symbols: | FUNCTIONS IN: molecular_function unknown;INVOLVED IN: rRNA processing;LOCATED IN: cytosol, nucleolus, nucleus;EXPRESSED IN: 22 plant structures;EXPRESSED DURING: 12 growth stages;CONTAINS InterPro DOMAIN/s: U3 small nucleolar
3	3	3		AT5G66470.1	AT5G66470.1	AT5G66470.1 | Symbols: | RNA binding;GTP binding | chr5:26541986-26544302 REVERSE LENGTH=427
3	3	3		AT5G66420.2;AT5G66420.1	AT5G66420.2;AT5G66420.1	AT5G66420.2 | Symbols: | LOCATED IN: cellular_component unknown;EXPRESSED IN: 23 plant structures;EXPRESSED DURING: 13 growth stages;CONTAINS InterPro DOMAIN/s: Uncharacterised conserved protein UCP033271 (InterPro:IPR008322), TIM-barrel signal transdu
1	3	3		AT5G66410.1	AT5G66410.1;AT3G50960.1	AT5G66410.1 | Symbols: PLP3b | phosducin-like protein 3 homolog | chr5:26519909-26521459 FORWARD LENGTH=230
3	3	3		AT5G66200.1	AT5G66200.1	AT5G66200.1 | Symbols: ARO2 | armadillo repeat only 2 | chr5:26453648-26455603 REVERSE LENGTH=651
1	3	2		AT5G66030.2;AT5G66030.1	AT5G66030.2;AT5G66030.1	AT5G66030.2 | Symbols: ATGRIP, GRIP | Golgi-localized GRIP domain-containing protein | chr5:26405133-26409888 REVERSE LENGTH=765;AT5G66030.1 | Symbols: ATGRIP, GRIP | Golgi-localized GRIP domain-containing protein | chr5:26405133-26409888 REVERSE LENGTH=78
3	3	3		AT5G65950.1	AT5G65950.1	AT5G65950.1 | Symbols: | FUNCTIONS IN: molecular_function unknown;INVOLVED IN: biological_process unknown;LOCATED IN: cellular_component unknown;EXPRESSED IN: 25 plant structures;EXPRESSED DURING: 15 growth stages;CONTAINS InterPro DOMAIN/s: Protein
0	3	0		AT5G65910.1	AT5G65910.1	AT5G65910.1 | Symbols: | BSD domain-containing protein | chr5:26361592-26363341 REVERSE LENGTH=432
3	3	3		AT5G65900.1	AT5G65900.1	AT5G65900.1 | Symbols: | DEA(D/H)-box RNA helicase family protein | chr5:26358328-26361244 FORWARD LENGTH=633
3	3	3		AT5G65770.3;AT5G65770.1;AT5G65770.2;AT5G65780.2	AT5G65770.3;AT5G65770.1;AT5G65770.2;AT5G65780.2	AT5G65770.3 | Symbols: LINC4 | little nuclei4 | chr5:26311587-26315610 FORWARD LENGTH=1010;AT5G65770.1 | Symbols: LINC4 | little nuclei4 | chr5:26311587-26315610 FORWARD LENGTH=1010;AT5G65770.2 | Symbols: LINC4 | little nuclei4 | chr5:26311587-26315544 FOR
3	3	3		AT5G65730.1	AT5G65730.1	AT5G65730.1 | Symbols: XTH6 | xyloglucan endotransglucosylase/hydrolase 6 | chr5:26299080-26300290 FORWARD LENGTH=292
3	3	3		AT5G65720.1;AT5G65720.2	AT5G65720.1;AT5G65720.2	AT5G65720.1 | Symbols: ATNIFS1, NIFS1, NFS1, ATNFS1 | nitrogen fixation S (NIFS)-like 1 | chr5:26296349-26297710 FORWARD LENGTH=453;AT5G65720.2 | Symbols: ATNIFS1, NIFS1, NFS1, ATNFS1 | nitrogen fixation S (NIFS)-like 1 | chr5:26296733-26297710 FORWARD LEN
3	3	3		AT5G65620.1	AT5G65620.1	AT5G65620.1 | Symbols: | Zincin-like metalloproteases family protein | chr5:26221951-26225784 FORWARD LENGTH=791
2	3	3		AT5G65590.1	AT5G65590.1;AT3G45610.1;AT4G38000.1;AT1G21340.1;AT1G28310.1;AT1G28310.2;AT5G62940.1	AT5G65590.1 | Symbols: | Dof-type zinc finger DNA-binding family protein | chr5:26212084-26213034 REVERSE LENGTH=316
3	3	3		AT5G65540.1	AT5G65540.1	AT5G65540.1 | Symbols: | unknown protein;Has 6825 Blast hits to 3811 proteins in 289 species: Archae - 0;Bacteria - 184;Metazoa - 2139;Fungi - 760;Plants - 816;Viruses - 52;Other Eukaryotes - 2874 (source: NCBI BLink). | chr5:26195710-26198112 FORW
0	3	3		AT5G65490.1	AT5G65490.1	AT5G65490.1 | Symbols: | FUNCTIONS IN: molecular_function unknown;INVOLVED IN: biological_process unknown;LOCATED IN: chloroplast;EXPRESSED IN: 22 plant structures;EXPRESSED DURING: 13 growth stages;CONTAINS InterPro DOMAIN/s: SGT1 (InterPro:IPR01077
3	3	3		AT5G65460.1	AT5G65460.1	AT5G65460.1 | Symbols: KCA2, KAC2 | kinesin like protein for actin based chloroplast movement 2 | chr5:26161831-26169001 REVERSE LENGTH=1264
0	3	3		AT5G65410.1	AT5G65410.1	AT5G65410.1 | Symbols: ATHB25, ZFHD2, HB25, ZHD1 | homeobox protein 25 | chr5:26136179-26137018 FORWARD LENGTH=279
3	3	3		AT5G65260.1	AT5G65260.1	AT5G65260.1 | Symbols: | RNA-binding (RRM/RBD/RNP motifs) family protein | chr5:26080501-26082984 REVERSE LENGTH=220
3	3	3		AT5G65220.1	AT5G65220.1	AT5G65220.1 | Symbols: | Ribosomal L29 family protein | chr5:26061301-26062506 FORWARD LENGTH=173
3	3	3		AT5G65110.1;AT5G65110.2	AT5G65110.1;AT5G65110.2	AT5G65110.1 | Symbols: ACX2, ATACX2 | acyl-CoA oxidase 2 | chr5:26009821-26012482 REVERSE LENGTH=692;AT5G65110.2 | Symbols: ACX2, ATACX2 | acyl-CoA oxidase 2 | chr5:26010060-26012482 REVERSE LENGTH=646
3	3	3		AT5G65020.1;AT5G65020.2	AT5G65020.1;AT5G65020.2	AT5G65020.1 | Symbols: ANNAT2 | annexin 2 | chr5:25973915-25975554 FORWARD LENGTH=317;AT5G65020.2 | Symbols: ANNAT2 | annexin 2 | chr5:25974366-25975554 FORWARD LENGTH=302
3	3	3		AT5G65010.1;AT5G65010.2	AT5G65010.1;AT5G65010.2	AT5G65010.1 | Symbols: ASN2 | asparagine synthetase 2 | chr5:25969224-25972278 FORWARD LENGTH=578;AT5G65010.2 | Symbols: ASN2 | asparagine synthetase 2 | chr5:25969224-25972278 FORWARD LENGTH=579
3	3	3		AT5G64960.1;AT5G64960.2	AT5G64960.1;AT5G64960.2	AT5G64960.1 | Symbols: CDKC2, CDKC;2 | cyclin dependent kinase group C2 | chr5:25955497-25958427 FORWARD LENGTH=513;AT5G64960.2 | Symbols: CDKC2, CDKC;2 | cyclin dependent kinase group C2 | chr5:25956150-25958427 FORWARD LENGTH=460
0	3	2		AT5G64850.1	AT5G64850.1	AT5G64850.1 | Symbols: | FUNCTIONS IN: molecular_function unknown;INVOLVED IN: biological_process unknown;LOCATED IN: plasma membrane;EXPRESSED IN: 22 plant structures;EXPRESSED DURING: 13 growth stages;CONTAINS InterPro DOMAIN/s: RPM1-interacting pr
3	3	3		AT5G64840.1	AT5G64840.1	AT5G64840.1 | Symbols: GCN5, ATGCN5 | general control non-repressible 5 | chr5:25916956-25919693 REVERSE LENGTH=692
1	3	0		AT5G64813.1	AT5G64813.1	AT5G64813.1 | Symbols: LIP1 | Ras-related small GTP-binding family protein | chr5:25910836-25912625 FORWARD LENGTH=342
3	3	2		AT5G64730.1	AT5G64730.1	AT5G64730.1 | Symbols: | Transducin/WD40 repeat-like superfamily protein | chr5:25873146-25875021 FORWARD LENGTH=299
3	3	3		AT5G64670.1	AT5G64670.1	AT5G64670.1 | Symbols: | Ribosomal protein L18e/L15 superfamily protein | chr5:25852535-25853880 REVERSE LENGTH=281
2	3	3		AT5G64610.1	AT5G64610.1;AT5G09740.2;AT5G09740.1	AT5G64610.1 | Symbols: HAM1 | histone acetyltransferase of the MYST family 1 | chr5:25828333-25830503 REVERSE LENGTH=445
2	3	3		AT5G64460.8;AT5G64460.6;AT5G64460.4;AT5G64460.3;AT5G64460.2;AT5G64460.1;AT5G64460.5;AT5G64460.7	AT5G64460.8;AT5G64460.6;AT5G64460.4;AT5G64460.3;AT5G64460.2;AT5G64460.1;AT5G64460.5;AT5G64460.7	AT5G64460.8 | Symbols: | Phosphoglycerate mutase family protein | chr5:25773009-25775104 REVERSE LENGTH=282;AT5G64460.6 | Symbols: | Phosphoglycerate mutase family protein | chr5:25773009-25775104 REVERSE LENGTH=282;AT5G64460.4 | Symbols: | Phosphoglyce
0	3	2		AT5G64430.1	AT5G64430.1	AT5G64430.1 | Symbols: | Octicosapeptide/Phox/Bem1p family protein | chr5:25762540-25764081 REVERSE LENGTH=513
2	3	3		AT5G64400.1;AT5G64400.2	AT5G64400.1;AT5G64400.2	AT5G64400.1 | Symbols: | CONTAINS InterPro DOMAIN/s: CHCH (InterPro:IPR010625);BEST Arabidopsis thaliana protein match is: Cox19-like CHCH family protein (TAIR:AT5G09570.1);Has 1807 Blast hits to 1807 proteins in 277 species: Archae - 0;Bacteria - 0;M
3	3	3		AT5G64330.1;AT5G64330.2	AT5G64330.1;AT5G64330.2	AT5G64330.1 | Symbols: NPH3, RPT3, JK218 | Phototropic-responsive NPH3 family protein | chr5:25727568-25730225 FORWARD LENGTH=746;AT5G64330.2 | Symbols: NPH3, RPT3, JK218 | Phototropic-responsive NPH3 family protein | chr5:25727568-25729510 FORWARD LENGTH=
3	3	3		AT5G64290.1	AT5G64290.1	AT5G64290.1 | Symbols: DCT, DIT2.1 | dicarboxylate transport 2.1 | chr5:25714495-25716642 REVERSE LENGTH=563
3	3	3		AT5G64270.1	AT5G64270.1	AT5G64270.1 | Symbols: | splicing factor, putative | chr5:25706909-25710718 FORWARD LENGTH=1269
3	3	3		AT5G64260.1	AT5G64260.1	AT5G64260.1 | Symbols: EXL2 | EXORDIUM like 2 | chr5:25703980-25704897 FORWARD LENGTH=305
3	3	3		AT5G64220.2;AT5G64220.1	AT5G64220.2;AT5G64220.1	AT5G64220.2 | Symbols: | Calmodulin-binding transcription activator protein with CG-1 and Ankyrin domains | chr5:25686434-25691903 FORWARD LENGTH=1050;AT5G64220.1 | Symbols: | Calmodulin-binding transcription activator protein with CG-1 and Ankyrin domai
0	3	3		AT5G64170.1;AT5G64170.2	AT5G64170.1;AT5G64170.2	AT5G64170.1 | Symbols: | dentin sialophosphoprotein-related | chr5:25672904-25675445 REVERSE LENGTH=566;AT5G64170.2 | Symbols: | dentin sialophosphoprotein-related | chr5:25672904-25675934 REVERSE LENGTH=616
1	3	3		AT5G64160.1	AT5G64160.1	AT5G64160.1 | Symbols: | unknown protein;FUNCTIONS IN: molecular_function unknown;INVOLVED IN: biological_process unknown;LOCATED IN: cellular_component unknown;EXPRESSED IN: 24 plant structures;EXPRESSED DURING: 15 growth stages;Has 30201 Blast hit
3	3	3		AT5G64140.1	AT5G64140.1	AT5G64140.1 | Symbols: RPS28 | ribosomal protein S28 | chr5:25667529-25667723 REVERSE LENGTH=64
0	3	3		AT5G64130.1;AT5G64130.3	AT5G64130.1;AT5G64130.3	AT5G64130.1 | Symbols: | cAMP-regulated phosphoprotein 19-related protein | chr5:25664547-25665339 REVERSE LENGTH=115;AT5G64130.3 | Symbols: | cAMP-regulated phosphoprotein 19-related protein | chr5:25664547-25665339 REVERSE LENGTH=140
3	3	3		AT5G64120.1	AT5G64120.1	AT5G64120.1 | Symbols: | Peroxidase superfamily protein | chr5:25659551-25660946 REVERSE LENGTH=328
3	3	3		AT5G64100.1	AT5G64100.1	AT5G64100.1 | Symbols: | Peroxidase superfamily protein | chr5:25650824-25652062 REVERSE LENGTH=331
3	3	3		AT5G64050.1	AT5G64050.1	AT5G64050.1 | Symbols: ATERS, OVA3, ERS | glutamate tRNA synthetase | chr5:25630196-25633099 REVERSE LENGTH=570
3	3	3		AT5G64040.1	AT5G64040.1;AT5G64040.2	AT5G64040.1 | Symbols: PSAN | photosystem I reaction center subunit PSI-N, chloroplast, putative / PSI-N, putative (PSAN) | chr5:25628724-25629409 REVERSE LENGTH=171
1	3	2		AT5G63980.1	AT5G63980.1	AT5G63980.1 | Symbols: SAL1, ALX8, ATSAL1, HOS2, FRY1, RON1 | Inositol monophosphatase family protein | chr5:25609840-25611802 FORWARD LENGTH=407
3	3	3		AT5G63860.1	AT5G63860.1	AT5G63860.1 | Symbols: UVR8 | Regulator of chromosome condensation (RCC1) family protein | chr5:25554821-25558587 REVERSE LENGTH=440
3	3	3		AT5G63810.1	AT5G63810.1	AT5G63810.1 | Symbols: BGAL10 | beta-galactosidase 10 | chr5:25537242-25541315 FORWARD LENGTH=741
3	3	3		AT5G63620.2;AT5G63620.1	AT5G63620.2;AT5G63620.1	AT5G63620.2 | Symbols: | GroES-like zinc-binding alcohol dehydrogenase family protein | chr5:25466380-25468296 REVERSE LENGTH=427;AT5G63620.1 | Symbols: | GroES-like zinc-binding alcohol dehydrogenase family protein | chr5:25466380-25468296 REVERSE LENGT
0	3	0		AT5G63600.1;AT5G63600.2	AT5G63600.1;AT5G63600.2	AT5G63600.1 | Symbols: FLS5, ATFLS5 | flavonol synthase 5 | chr5:25461082-25462270 REVERSE LENGTH=325;AT5G63600.2 | Symbols: FLS5, ATFLS5 | flavonol synthase 5 | chr5:25461082-25462270 REVERSE LENGTH=326
3	3	3		AT5G63550.1;AT5G63550.2	AT5G63550.1;AT5G63550.2	AT5G63550.1 | Symbols: | DEK domain-containing chromatin associated protein | chr5:25444805-25447934 FORWARD LENGTH=530;AT5G63550.2 | Symbols: | DEK domain-containing chromatin associated protein | chr5:25444805-25447934 FORWARD LENGTH=531
3	3	3		AT5G63420.1	AT5G63420.1	AT5G63420.1 | Symbols: emb2746 | RNA-metabolising metallo-beta-lactamase family protein | chr5:25400515-25405807 FORWARD LENGTH=911
3	3	3		AT5G63190.2;AT5G63190.1	AT5G63190.2;AT5G63190.1;AT3G48390.1;AT1G22730.1	AT5G63190.2 | Symbols: | MA3 domain-containing protein | chr5:25346145-25348563 FORWARD LENGTH=702;AT5G63190.1 | Symbols: | MA3 domain-containing protein | chr5:25346145-25348563 FORWARD LENGTH=702
3	3	3		AT5G63140.1	AT5G63140.1	AT5G63140.1 | Symbols: ATPAP29, PAP29 | purple acid phosphatase 29 | chr5:25328237-25329616 FORWARD LENGTH=389
3	3	3		AT5G63120.2;AT5G63120.1	AT5G63120.2;AT5G63120.1	AT5G63120.2 | Symbols: | P-loop containing nucleoside triphosphate hydrolases superfamily protein | chr5:25318967-25322071 REVERSE LENGTH=591;AT5G63120.1 | Symbols: | P-loop containing nucleoside triphosphate hydrolases superfamily protein | chr5:2531979
1	3	2		AT5G62980.1	AT5G62980.1	AT5G62980.1 | Symbols: FOLB2 | Dihydroneopterin aldolase | chr5:25276384-25277083 FORWARD LENGTH=131
3	3	3		AT5G62930.1	AT5G62930.1	AT5G62930.1 | Symbols: | SGNH hydrolase-type esterase superfamily protein | chr5:25254912-25256357 FORWARD LENGTH=242
2	3	1		AT5G62810.1	AT5G62810.1	AT5G62810.1 | Symbols: PEX14, ATPEX14, PED2 | peroxin 14 | chr5:25220323-25223571 FORWARD LENGTH=507
3	3	3		AT5G62790.1;AT5G62790.2	AT5G62790.1;AT5G62790.2	AT5G62790.1 | Symbols: DXR, PDE129 | 1-deoxy-D-xylulose 5-phosphate reductoisomerase | chr5:25214358-25217292 REVERSE LENGTH=477;AT5G62790.2 | Symbols: DXR | 1-deoxy-D-xylulose 5-phosphate reductoisomerase | chr5:25214358-25217289 REVERSE LENGTH=497
3	3	3		AT5G62700.1;AT5G62690.1	AT5G62700.1;AT5G62690.1	AT5G62700.1 | Symbols: TUB3 | tubulin beta chain 3 | chr5:25184501-25186426 FORWARD LENGTH=450;AT5G62690.1 | Symbols: TUB2 | tubulin beta chain 2 | chr5:25181560-25183501 FORWARD LENGTH=450
3	3	3		AT5G62670.1;AT3G47950.1	AT5G62670.1;AT3G47950.1	AT5G62670.1 | Symbols: AHA11, HA11 | H(+)-ATPase 11 | chr5:25159495-25164957 FORWARD LENGTH=956;AT3G47950.1 | Symbols: AHA4, HA4 | H(+)-ATPase 4 | chr3:17693015-17697801 FORWARD LENGTH=960
3	3	3		AT5G62390.1	AT5G62390.1	AT5G62390.1 | Symbols: ATBAG7, BAG7 | BCL-2-associated athanogene 7 | chr5:25052377-25054170 REVERSE LENGTH=446
3	3	3		AT5G62350.1	AT5G62350.1	AT5G62350.1 | Symbols: | Plant invertase/pectin methylesterase inhibitor superfamily protein | chr5:25037504-25038112 FORWARD LENGTH=202
3	3	3		AT5G62300.2;AT5G62300.1;AT3G45030.1	AT5G62300.2;AT5G62300.1;AT3G45030.1	AT5G62300.2 | Symbols: | Ribosomal protein S10p/S20e family protein | chr5:25021388-25022235 REVERSE LENGTH=124;AT5G62300.1 | Symbols: | Ribosomal protein S10p/S20e family protein | chr5:25021388-25022235 REVERSE LENGTH=124;AT3G45030.1 | Symbols: | Ribo
3	3	3		AT5G62270.1;AT5G62270.2	AT5G62270.1;AT5G62270.2	AT5G62270.1 | Symbols: | BEST Arabidopsis thaliana protein match is: mucin-related (TAIR:AT2G02880.1);Has 35333 Blast hits to 34131 proteins in 2444 species: Archae - 798;Bacteria - 22429;Metazoa - 974;Fungi - 991;Plants - 531;Viruses - 0;Other Euk
3	3	3		AT5G62190.1	AT5G62190.1	AT5G62190.1 | Symbols: PRH75 | DEAD box RNA helicase (PRH75) | chr5:24980542-24983879 REVERSE LENGTH=671
1	3	3		AT5G62000.3;AT5G62000.2;AT5G62000.1;AT5G62000.4	AT5G62000.3;AT5G62000.2;AT5G62000.1;AT5G62000.4;AT1G59750.4;AT1G59750.2;AT1G59750.3;AT1G59750.1	AT5G62000.3 | Symbols: ARF2, ARF1-BP, HSS, ORE14 | auxin response factor 2 | chr5:24910859-24914680 FORWARD LENGTH=859;AT5G62000.2 | Symbols: ARF2, ARF1-BP, HSS, ORE14 | auxin response factor 2 | chr5:24910859-24914680 FORWARD LENGTH=859;AT5G62000.1 | Symb
3	3	3		AT5G61970.1	AT5G61970.1	AT5G61970.1 | Symbols: | signal recognition particle-related / SRP-related | chr5:24888920-24893079 FORWARD LENGTH=605
3	3	3		AT5G61780.1	AT5G61780.1	AT5G61780.1 | Symbols: Tudor2, AtTudor2, TSN2 | TUDOR-SN protein 2 | chr5:24822012-24826641 FORWARD LENGTH=985
1	3	2		AT5G61210.1	AT5G61210.1	AT5G61210.1 | Symbols: SNAP33, ATSNAP33, SNP33, ATSNAP33B | soluble N-ethylmaleimide-sensitive factor adaptor protein 33 | chr5:24624027-24625366 FORWARD LENGTH=300
3	3	3		AT5G61150.2;AT5G61150.1	AT5G61150.2;AT5G61150.1	AT5G61150.2 | Symbols: VIP4 | leo1-like family protein | chr5:24603846-24607528 REVERSE LENGTH=623;AT5G61150.1 | Symbols: VIP4 | leo1-like family protein | chr5:24603846-24607528 REVERSE LENGTH=625
3	3	3		AT5G61140.1;AT5G61140.2	AT5G61140.1;AT5G61140.2	AT5G61140.1 | Symbols: | U5 small nuclear ribonucleoprotein helicase | chr5:24589999-24603311 FORWARD LENGTH=2146;AT5G61140.2 | Symbols: | U5 small nuclear ribonucleoprotein helicase | chr5:24589999-24603311 FORWARD LENGTH=2157
0	3	0		AT5G61000.1	AT5G61000.1	AT5G61000.1 | Symbols: RPA70D, ATRPA70D | Replication factor-A protein 1-related | chr5:24549682-24552641 REVERSE LENGTH=629
3	3	3		AT5G60980.1;AT5G60980.2	AT5G60980.1;AT5G60980.2	AT5G60980.1 | Symbols: | Nuclear transport factor 2 (NTF2) family protein with RNA binding (RRM-RBD-RNP motifs) domain | chr5:24543988-24546027 FORWARD LENGTH=459;AT5G60980.2 | Symbols: | Nuclear transport factor 2 (NTF2) family protein with RNA binding
3	3	3		AT5G60790.1	AT5G60790.1	AT5G60790.1 | Symbols: ATGCN1, GCN1 | ABC transporter family protein | chr5:24453760-24455767 REVERSE LENGTH=595
3	3	3		AT5G60600.1;AT5G60600.2;AT5G60600.3	AT5G60600.1;AT5G60600.2;AT5G60600.3	AT5G60600.1 | Symbols: GCPE, ISPG, CSB3, CLB4, HDS | 4-hydroxy-3-methylbut-2-enyl diphosphate synthase | chr5:24359447-24363274 FORWARD LENGTH=741;AT5G60600.2 | Symbols: GCPE, ISPG, CSB3, CLB4, HDS | 4-hydroxy-3-methylbut-2-enyl diphosphate synthase | chr5
3	3	3		AT5G60540.1	AT5G60540.1	AT5G60540.1 | Symbols: EMB2407, ATPDX2, PDX2 | pyridoxine biosynthesis 2 | chr5:24336874-24338647 REVERSE LENGTH=255
0	3	3		AT5G60410.3;AT5G60410.1;AT5G60410.4;AT5G60410.5;AT5G60410.2	AT5G60410.3;AT5G60410.1;AT5G60410.4;AT5G60410.5;AT5G60410.2	AT5G60410.3 | Symbols: ATSIZ1, SIZ1 | DNA-binding protein with MIZ/SP-RING zinc finger, PHD-finger and SAP domain | chr5:24295226-24300300 FORWARD LENGTH=832;AT5G60410.1 | Symbols: ATSIZ1, SIZ1 | DNA-binding protein with MIZ/SP-RING zinc finger, PHD-finger
3	3	3		AT5G60390.3;AT5G60390.1;AT1G07940.2;AT1G07940.1;AT1G07930.1;AT1G07920.1;AT5G60390.2;AT1G07930.2	AT5G60390.3;AT5G60390.1;AT1G07940.2;AT1G07940.1;AT1G07930.1;AT1G07920.1;AT5G60390.2;AT1G07930.2;AT1G35550.1	AT5G60390.3 | Symbols: | GTP binding Elongation factor Tu family protein | chr5:24289226-24290675 FORWARD LENGTH=449;AT5G60390.1 | Symbols: | GTP binding Elongation factor Tu family protein | chr5:24289226-24290675 FORWARD LENGTH=449;AT1G07940.2 | Symbol
3	3	3		AT5G60160.1	AT5G60160.1	AT5G60160.1 | Symbols: | Zn-dependent exopeptidases superfamily protein | chr5:24223887-24226783 REVERSE LENGTH=477
3	3	3		AT5G60120.1;AT5G60120.2	AT5G60120.1;AT5G60120.2	AT5G60120.1 | Symbols: TOE2 | target of early activation tagged (EAT) 2 | chr5:24208153-24211067 FORWARD LENGTH=485;AT5G60120.2 | Symbols: TOE2 | target of early activation tagged (EAT) 2 | chr5:24208153-24211067 FORWARD LENGTH=507
2	3	2		AT5G60040.1;AT5G60040.2	AT5G60040.1;AT5G60040.2	AT5G60040.1 | Symbols: NRPC1 | nuclear RNA polymerase C1 | chr5:24173590-24183269 FORWARD LENGTH=1376;AT5G60040.2 | Symbols: NRPC1 | nuclear RNA polymerase C1 | chr5:24173590-24183269 FORWARD LENGTH=1391
0	3	2		AT5G59980.1;AT5G59980.2	AT5G59980.1;AT5G59980.2	AT5G59980.1 | Symbols: | Polymerase/histidinol phosphatase-like | chr5:24147207-24149392 FORWARD LENGTH=581;AT5G59980.2 | Symbols: | Polymerase/histidinol phosphatase-like | chr5:24147207-24149783 FORWARD LENGTH=705
3	3	3		AT5G59970.1;AT5G59690.1;AT3G53730.1;AT3G46320.1;AT3G45930.1;AT2G28740.1;AT1G07820.2;AT1G07820.1;AT1G07660.1;AT1G07660.2	AT5G59970.1;AT5G59690.1;AT3G53730.1;AT3G46320.1;AT3G45930.1;AT2G28740.1;AT1G07820.2;AT1G07820.1;AT1G07660.1;AT1G07660.2	AT5G59970.1 | Symbols: | Histone superfamily protein | chr5:24146352-24146663 REVERSE LENGTH=103;AT5G59690.1 | Symbols: | Histone superfamily protein | chr5:24051649-24051960 FORWARD LENGTH=103;AT3G53730.1 | Symbols: | Histone superfamily protein | chr3
3	3	3		AT5G59960.1	AT5G59960.1	AT5G59960.1 | Symbols: | unknown protein;FUNCTIONS IN: molecular_function unknown;INVOLVED IN: biological_process unknown;LOCATED IN: nucleus;EXPRESSED IN: 24 plant structures;EXPRESSED DURING: 15 growth stages;Has 30201 Blast hits to 17322 proteins
3	3	3		AT5G59950.4;AT5G59950.1;AT5G59950.5;AT5G59950.3;AT5G59950.2	AT5G59950.4;AT5G59950.1;AT5G59950.5;AT5G59950.3;AT5G59950.2	AT5G59950.4 | Symbols: | RNA-binding (RRM/RBD/RNP motifs) family protein | chr5:24140235-24141410 FORWARD LENGTH=211;AT5G59950.1 | Symbols: | RNA-binding (RRM/RBD/RNP motifs) family protein | chr5:24140235-24141504 FORWARD LENGTH=244;AT5G59950.5 | Symbol
3	3	3		AT5G59890.1;AT3G46010.1;AT5G59890.2	AT5G59890.1;AT3G46010.1;AT5G59890.2;AT3G46010.2	AT5G59890.1 | Symbols: ADF4, ATADF4 | actin depolymerizing factor 4 | chr5:24122545-24123596 FORWARD LENGTH=139;AT3G46010.1 | Symbols: ADF1, atadf, ATADF1 | actin depolymerizing factor 1 | chr3:16909679-16910678 REVERSE LENGTH=139;AT5G59890.2 | Symbols: AD
3	3	3		AT5G59880.2;AT5G59880.1	AT5G59880.2;AT5G59880.1	AT5G59880.2 | Symbols: ADF3 | actin depolymerizing factor 3 | chr5:24120382-24121628 FORWARD LENGTH=124;AT5G59880.1 | Symbols: ADF3 | actin depolymerizing factor 3 | chr5:24120382-24121628 FORWARD LENGTH=139
3	3	3		AT5G59870.1	AT5G59870.1	AT5G59870.1 | Symbols: HTA6 | histone H2A 6 | chr5:24115605-24116144 REVERSE LENGTH=150
3	3	3		AT5G59850.1;AT1G07770.2;AT1G07770.1	AT5G59850.1;AT1G07770.2;AT1G07770.1;AT2G39590.1	AT5G59850.1 | Symbols: | Ribosomal protein S8 family protein | chr5:24112499-24113084 REVERSE LENGTH=130;AT1G07770.2 | Symbols: RPS15A | ribosomal protein S15A | chr1:2408413-2409065 REVERSE LENGTH=130;AT1G07770.1 | Symbols: RPS15A | ribosomal protein S15
1	3	3		AT5G59830.2;AT5G59830.1	AT5G59830.2;AT5G59830.1	AT5G59830.2 | Symbols: | unknown protein;BEST Arabidopsis thaliana protein match is: unknown protein (TAIR:AT5G13660.2);Has 35333 Blast hits to 34131 proteins in 2444 species: Archae - 798;Bacteria - 22429;Metazoa - 974;Fungi - 991;Plants - 531;Vir
3	3	3		AT5G59730.2;AT5G59730.1	AT5G59730.2;AT5G59730.1	AT5G59730.2 | Symbols: ATEXO70H7, EXO70H7 | exocyst subunit exo70 family protein H7 | chr5:24064096-24066004 REVERSE LENGTH=632;AT5G59730.1 | Symbols: ATEXO70H7, EXO70H7 | exocyst subunit exo70 family protein H7 | chr5:24064100-24066004 REVERSE LENGTH=634
3	3	3		AT5G59540.1;AT5G59540.2	AT5G59540.1;AT5G59540.2;AT1G04380.1	AT5G59540.1 | Symbols: | 2-oxoglutarate (2OG) and Fe(II)-dependent oxygenase superfamily protein | chr5:23996293-23997576 REVERSE LENGTH=366;AT5G59540.2 | Symbols: | 2-oxoglutarate (2OG) and Fe(II)-dependent oxygenase superfamily protein | chr5:23996615-
3	3	3		AT5G59420.1	AT5G59420.1	AT5G59420.1 | Symbols: ORP3C | OSBP(oxysterol binding protein)-related protein 3C | chr5:23961731-23964623 FORWARD LENGTH=457
3	3	3		AT5G59290.1;AT5G59290.2	AT5G59290.1;AT5G59290.2	AT5G59290.1 | Symbols: UXS3, ATUXS3 | UDP-glucuronic acid decarboxylase 3 | chr5:23915814-23917953 REVERSE LENGTH=342;AT5G59290.2 | Symbols: UXS3, ATUXS3 | UDP-glucuronic acid decarboxylase 3 | chr5:23915814-23917998 REVERSE LENGTH=357
2	3	3		AT5G58950.1	AT5G58950.1	AT5G58950.1 | Symbols: | Protein kinase superfamily protein | chr5:23801136-23803025 REVERSE LENGTH=525
0	3	3		AT5G58760.1	AT5G58760.1	AT5G58760.1 | Symbols: DDB2 | damaged DNA binding 2 | chr5:23730741-23733606 REVERSE LENGTH=557
3	3	3		AT5G58710.1	AT5G58710.1	AT5G58710.1 | Symbols: ROC7 | rotamase CYP 7 | chr5:23717840-23719495 FORWARD LENGTH=204
3	3	3		AT5G58490.1	AT5G58490.1	AT5G58490.1 | Symbols: | NAD(P)-binding Rossmann-fold superfamily protein | chr5:23643068-23644455 FORWARD LENGTH=324
3	3	3		AT5G58470.2;AT5G58470.1	AT5G58470.2;AT5G58470.1	AT5G58470.2 | Symbols: TAF15b | TBP-associated factor 15B | chr5:23638566-23640854 REVERSE LENGTH=422;AT5G58470.1 | Symbols: TAF15b | TBP-associated factor 15B | chr5:23638566-23640854 REVERSE LENGTH=422
2	3	3		AT5G58440.1	AT5G58440.1	AT5G58440.1 | Symbols: SNX2a | sorting nexin 2A | chr5:23624154-23626676 REVERSE LENGTH=587
3	2	3		AT5G58410.1	AT5G58410.1	AT5G58410.1 | Symbols: | HEAT/U-box domain-containing protein | chr5:23609663-23617343 FORWARD LENGTH=1873
3	3	3		AT5G58330.3;AT5G58330.2;AT5G58330.1	AT5G58330.3;AT5G58330.2;AT5G58330.1	AT5G58330.3 | Symbols: | lactate/malate dehydrogenase family protein | chr5:23580010-23581751 REVERSE LENGTH=334;AT5G58330.2 | Symbols: | lactate/malate dehydrogenase family protein | chr5:23580010-23582287 REVERSE LENGTH=442;AT5G58330.1 | Symbols: | la
3	3	3		AT5G58290.1	AT5G58290.1	AT5G58290.1 | Symbols: RPT3 | regulatory particle triple-A ATPase 3 | chr5:23569155-23571116 FORWARD LENGTH=408
3	3	3		AT5G58230.1	AT5G58230.1	AT5G58230.1 | Symbols: MSI1, MEE70, ATMSI1 | Transducin/WD40 repeat-like superfamily protein | chr5:23556112-23557994 FORWARD LENGTH=424
3	3	3		AT5G58140.3;AT5G58140.2;AT5G58140.1;AT5G58140.4	AT5G58140.3;AT5G58140.2;AT5G58140.1;AT5G58140.4	AT5G58140.3 | Symbols: PHOT2, NPL1 | phototropin 2 | chr5:23524771-23529947 FORWARD LENGTH=898;AT5G58140.2 | Symbols: PHOT2, NPL1 | phototropin 2 | chr5:23524771-23529993 FORWARD LENGTH=915;AT5G58140.1 | Symbols: PHOT2, NPL1 | phototropin 2 | chr5:23524771
1	3	3		AT5G58130.1	AT5G58130.1	AT5G58130.1 | Symbols: ROS3 | RNA-binding (RRM/RBD/RNP motifs) family protein | chr5:23521190-23523766 REVERSE LENGTH=748
3	3	3		AT5G58110.1	AT5G58110.1	AT5G58110.1 | Symbols: | chaperone binding;ATPase activators | chr5:23515275-23516479 FORWARD LENGTH=196
3	3	3		AT5G58070.1	AT5G58070.1	AT5G58070.1 | Symbols: ATTIL, TIL | temperature-induced lipocalin | chr5:23500512-23501156 REVERSE LENGTH=186
3	3	3		AT5G58060.1;AT5G58060.2	AT5G58060.1;AT5G58060.2;AT5G58180.2;AT5G58180.1	AT5G58060.1 | Symbols: YKT61, ATYKT61, ATGP1 | SNARE-like superfamily protein | chr5:23498277-23500128 FORWARD LENGTH=199;AT5G58060.2 | Symbols: YKT61, ATYKT61, ATGP1 | SNARE-like superfamily protein | chr5:23498277-23500128 FORWARD LENGTH=221
3	3	3		AT5G58040.1	AT5G58040.1	AT5G58040.1 | Symbols: ATFIP1[V], FIPS5, ATFIPS5, FIP1[V] | homolog of yeast FIP1 [V] | chr5:23488865-23494000 FORWARD LENGTH=1196
2	3	3		AT5G58020.1	AT5G58020.1	AT5G58020.1 | Symbols: | unknown protein;CONTAINS InterPro DOMAIN/s: Protein of unknown function DUF602 (InterPro:IPR006735);Has 385 Blast hits to 385 proteins in 189 species: Archae - 0;Bacteria - 0;Metazoa - 153;Fungi - 117;Plants - 50;Viruses -
3	3	3		AT5G57990.1	AT5G57990.1	AT5G57990.1 | Symbols: UBP23 | ubiquitin-specific protease 23 | chr5:23470218-23473997 REVERSE LENGTH=859
3	3	3		AT5G57870.1;AT5G57870.2	AT5G57870.1;AT5G57870.2	AT5G57870.1 | Symbols: eIFiso4G1 | MIF4G domain-containing protein / MA3 domain-containing protein | chr5:23439755-23443433 FORWARD LENGTH=780;AT5G57870.2 | Symbols: eIFiso4G1 | MIF4G domain-containing protein / MA3 domain-containing protein | chr5:2343975
1	3	3		AT5G57580.1	AT5G57580.1;AT4G25800.2;AT4G25800.1	AT5G57580.1 | Symbols: | Calmodulin-binding protein | chr5:23314994-23317683 REVERSE LENGTH=647
2	3	3		AT5G57490.1	AT5G57490.1	AT5G57490.1 | Symbols: VDAC4, ATVDAC4 | voltage dependent anion channel 4 | chr5:23283895-23285335 REVERSE LENGTH=274
3	3	3		AT5G57460.1	AT5G57460.1	AT5G57460.1 | Symbols: | unknown protein;FUNCTIONS IN: molecular_function unknown;INVOLVED IN: biological_process unknown;LOCATED IN: plasma membrane, chloroplast;EXPRESSED IN: 23 plant structures;EXPRESSED DURING: 13 growth stages;Has 166 Blast hit
3	3	3		AT5G57160.1	AT5G57160.1	AT5G57160.1 | Symbols: ATLIG4, LIG4 | DNA ligase IV | chr5:23155150-23161688 REVERSE LENGTH=1219
3	3	3		AT5G57120.1	AT5G57120.1	AT5G57120.1 | Symbols: | FUNCTIONS IN: molecular_function unknown;INVOLVED IN: biological_process unknown;LOCATED IN: nucleolus;EXPRESSED IN: 21 plant structures;EXPRESSED DURING: 13 growth stages;CONTAINS InterPro DOMAIN/s: LisH dimerisation motif (
3	3	3		AT5G57110.2;AT5G57110.1	AT5G57110.2;AT5G57110.1	AT5G57110.2 | Symbols: ACA8, AT-ACA8 | autoinhibited Ca2+ -ATPase, isoform 8 | chr5:23109729-23116857 REVERSE LENGTH=1074;AT5G57110.1 | Symbols: ACA8, AT-ACA8 | autoinhibited Ca2+ -ATPase, isoform 8 | chr5:23109729-23116857 REVERSE LENGTH=1074
3	3	3		AT5G57020.1	AT5G57020.1	AT5G57020.1 | Symbols: NMT1, ATNMT1 | myristoyl-CoA:protein N-myristoyltransferase | chr5:23075451-23076755 FORWARD LENGTH=434
3	3	3		AT5G56950.1	AT5G56950.1	AT5G56950.1 | Symbols: NFA03, NFA3, NAP1;3 | nucleosome assembly protein 1;3 | chr5:23032618-23035299 FORWARD LENGTH=374
3	3	3		AT5G56900.2;AT5G56900.1	AT5G56900.2;AT5G56900.1	AT5G56900.2 | Symbols: | CwfJ-like family protein / zinc finger (CCCH-type) family protein | chr5:23019750-23022670 REVERSE LENGTH=596;AT5G56900.1 | Symbols: | CwfJ-like family protein / zinc finger (CCCH-type) family protein | chr5:23019750-23021850 REV
3	3	3		AT5G56870.1;AT4G26140.2;AT4G26140.1	AT5G56870.1;AT4G26140.2;AT4G26140.1;AT1G45130.1;AT5G20710.1	AT5G56870.1 | Symbols: BGAL4 | beta-galactosidase 4 | chr5:23004284-23008410 FORWARD LENGTH=724;AT4G26140.2 | Symbols: BGAL12 | beta-galactosidase 12 | chr4:13243674-13247823 REVERSE LENGTH=636;AT4G26140.1 | Symbols: BGAL12 | beta-galactosidase 12 | chr4:1
1	3	3		AT5G56760.1	AT5G56760.1	AT5G56760.1 | Symbols: ATSERAT1;1, SAT5, SAT-52, SERAT1;1 | serine acetyltransferase 1;1 | chr5:22961498-22962582 REVERSE LENGTH=312
3	3	3		AT5G56740.1	AT5G56740.1	AT5G56740.1 | Symbols: HAG2, HAC7, HAG02, HAC07 | histone acetyltransferase of the GNAT family 2 | chr5:22953009-22955577 REVERSE LENGTH=467
3	3	3		AT5G56710.1;AT4G26230.1;AT2G19740.1	AT5G56710.1;AT4G26230.1;AT2G19740.1;AT5G56710.2	AT5G56710.1 | Symbols: | Ribosomal protein L31e family protein | chr5:22944003-22944767 REVERSE LENGTH=119;AT4G26230.1 | Symbols: | Ribosomal protein L31e family protein | chr4:13286026-13286553 FORWARD LENGTH=119;AT2G19740.1 | Symbols: | Ribosomal prot
3	3	3		AT5G56680.1	AT5G56680.1	AT5G56680.1 | Symbols: SYNC1, EMB2755, SYNC1 ARATH | Class II aminoacyl-tRNA and biotin synthetases superfamily protein | chr5:22936645-22938841 FORWARD LENGTH=572
3	3	3		AT5G56670.1;AT4G29390.1;AT2G19750.1	AT5G56670.1;AT4G29390.1;AT2G19750.1	AT5G56670.1 | Symbols: | Ribosomal protein S30 family protein | chr5:22935413-22935981 REVERSE LENGTH=62;AT4G29390.1 | Symbols: | Ribosomal protein S30 family protein | chr4:14465212-14465902 REVERSE LENGTH=62;AT2G19750.1 | Symbols: | Ribosomal protein
3	3	3		AT5G56630.1;AT4G26270.1	AT5G56630.1;AT4G26270.1	AT5G56630.1 | Symbols: PFK7 | phosphofructokinase 7 | chr5:22924311-22926728 FORWARD LENGTH=485;AT4G26270.1 | Symbols: PFK3 | phosphofructokinase 3 | chr4:13301094-13304030 REVERSE LENGTH=489
3	3	3		AT5G56460.1	AT5G56460.1	AT5G56460.1 | Symbols: | Protein kinase superfamily protein | chr5:22865509-22867866 FORWARD LENGTH=408
3	3	3		AT5G56350.1	AT5G56350.1;AT4G26390.1	AT5G56350.1 | Symbols: | Pyruvate kinase family protein | chr5:22820254-22822529 REVERSE LENGTH=498
1	3	3		AT5G56290.1	AT5G56290.1	AT5G56290.1 | Symbols: PEX5, ATPEX5 | peroxin 5 | chr5:22786655-22791972 FORWARD LENGTH=728
3	3	3		AT5G56140.1;AT4G26480.1	AT5G56140.1;AT4G26480.1	AT5G56140.1 | Symbols: | RNA-binding KH domain-containing protein | chr5:22725462-22727932 FORWARD LENGTH=315;AT4G26480.1 | Symbols: | RNA-binding KH domain-containing protein | chr4:13372885-13375793 REVERSE LENGTH=308
3	3	3		AT5G56030.1;AT5G56030.2	AT5G56030.1;AT5G56030.2	AT5G56030.1 | Symbols: HSP81-2, ERD8, HSP90.2, AtHsp90.2 | heat shock protein 81-2 | chr5:22686923-22689433 FORWARD LENGTH=699;AT5G56030.2 | Symbols: HSP81-2 | heat shock protein 81-2 | chr5:22686923-22689433 FORWARD LENGTH=728
3	3	3		AT5G55920.1	AT5G55920.1	AT5G55920.1 | Symbols: OLI2 | S-adenosyl-L-methionine-dependent methyltransferases superfamily protein | chr5:22645742-22649383 REVERSE LENGTH=682
0	3	0		AT5G55850.3;AT5G55850.1;AT5G55850.2	AT5G55850.3;AT5G55850.1;AT5G55850.2	AT5G55850.3 | Symbols: NOI | RPM1-interacting protein 4 (RIN4) family protein | chr5:22603617-22604850 FORWARD LENGTH=95;AT5G55850.1 | Symbols: NOI | RPM1-interacting protein 4 (RIN4) family protein | chr5:22603617-22604951 FORWARD LENGTH=114;AT5G55850.2 |
3	2	3		AT5G55760.1	AT5G55760.1	AT5G55760.1 | Symbols: SRT1 | sirtuin 1 | chr5:22567282-22570716 FORWARD LENGTH=473
3	3	3		AT5G55670.2;AT5G55670.1	AT5G55670.2;AT5G55670.1	AT5G55670.2 | Symbols: | RNA-binding (RRM/RBD/RNP motifs) family protein | chr5:22544669-22546801 REVERSE LENGTH=585;AT5G55670.1 | Symbols: | RNA-binding (RRM/RBD/RNP motifs) family protein | chr5:22544669-22546801 REVERSE LENGTH=710
3	3	3		AT5G55660.1	AT5G55660.1	AT5G55660.1 | Symbols: | DEK domain-containing chromatin associated protein | chr5:22539375-22543142 FORWARD LENGTH=778
0	3	1		AT5G55640.1	AT5G55640.1	AT5G55640.1 | Symbols: | unknown protein;Has 30201 Blast hits to 17322 proteins in 780 species: Archae - 12;Bacteria - 1396;Metazoa - 17338;Fungi - 3422;Plants - 5037;Viruses - 0;Other Eukaryotes - 2996 (source: NCBI BLink). | chr5:22533244-2253392
3	3	3		AT5G55610.2;AT5G55610.1	AT5G55610.2;AT5G55610.1	AT5G55610.2 | Symbols: | unknown protein;LOCATED IN: mitochondrion, plastid, membrane;EXPRESSED IN: 25 plant structures;EXPRESSED DURING: 13 growth stages;Has 35333 Blast hits to 34131 proteins in 2444 species: Archae - 798;Bacteria - 22429;Metazoa
0	3	0		AT5G55550.4;AT5G55550.1;AT5G55550.3;AT5G55550.2	AT5G55550.4;AT5G55550.1;AT5G55550.3;AT5G55550.2	AT5G55550.4 | Symbols: | RNA-binding (RRM/RBD/RNP motifs) family protein | chr5:22502077-22503658 REVERSE LENGTH=448;AT5G55550.1 | Symbols: | RNA-binding (RRM/RBD/RNP motifs) family protein | chr5:22502077-22503658 REVERSE LENGTH=448;AT5G55550.3 | Symbol
2	3	3		AT5G55530.3;AT5G55530.2;AT5G55530.1	AT5G55530.3;AT5G55530.2;AT5G55530.1	AT5G55530.3 | Symbols: | Calcium-dependent lipid-binding (CaLB domain) family protein | chr5:22494439-22495656 FORWARD LENGTH=405;AT5G55530.2 | Symbols: | Calcium-dependent lipid-binding (CaLB domain) family protein | chr5:22494439-22495656 FORWARD LENGT
3	3	3		AT5G55300.1;AT5G55300.2;AT5G55300.3	AT5G55300.1;AT5G55300.2;AT5G55300.3;AT5G55310.1	AT5G55300.1 | Symbols: MGO1, TOP1ALPHA, TOP1 | DNA topoisomerase I alpha | chr5:22424837-22429045 REVERSE LENGTH=916;AT5G55300.2 | Symbols: TOP1ALPHA | DNA topoisomerase I alpha | chr5:22424701-22429045 REVERSE LENGTH=933;AT5G55300.3 | Symbols: TOP1ALPHA |
3	1	3		AT5G55240.1	AT5G55240.1	AT5G55240.1 | Symbols: ATPXG2 | ARABIDOPSIS THALIANA PEROXYGENASE 2 | chr5:22405963-22407158 FORWARD LENGTH=243
0	3	0		AT5G55210.1	AT5G55210.1	AT5G55210.1 | Symbols: | unknown protein;FUNCTIONS IN: molecular_function unknown;INVOLVED IN: biological_process unknown;LOCATED IN: chloroplast;EXPRESSED IN: 23 plant structures;EXPRESSED DURING: 13 growth stages;BEST Arabidopsis thaliana protein
3	3	3		AT5G55160.1;AT5G55160.2	AT5G55160.1;AT5G55160.2	AT5G55160.1 | Symbols: SUM2, SUMO 2, SUMO2, ATSUMO2 | small ubiquitin-like modifier 2 | chr5:22383747-22384772 REVERSE LENGTH=103;AT5G55160.2 | Symbols: SUM2, SUMO 2, SUMO2, ATSUMO2 | small ubiquitin-like modifier 2 | chr5:22383747-22384772 REVERSE LENGTH=
3	2	3		AT5G55130.2;AT5G55130.1	AT5G55130.2;AT5G55130.1	AT5G55130.2 | Symbols: CNX5, SIR1 | co-factor for nitrate, reductase and xanthine dehydrogenase 5 | chr5:22373374-22376028 REVERSE LENGTH=437;AT5G55130.1 | Symbols: CNX5, SIR1 | co-factor for nitrate, reductase and xanthine dehydrogenase 5 | chr5:22373374-
3	3	3		AT5G55070.1	AT5G55070.1	AT5G55070.1 | Symbols: | Dihydrolipoamide succinyltransferase | chr5:22347637-22350409 FORWARD LENGTH=464
3	2	3		AT5G55050.1	AT5G55050.1	AT5G55050.1 | Symbols: | GDSL-like Lipase/Acylhydrolase superfamily protein | chr5:22337745-22339741 FORWARD LENGTH=376
0	3	3		AT5G55040.2;AT5G55040.1	AT5G55040.2;AT5G55040.1	AT5G55040.2 | Symbols: | DNA-binding bromodomain-containing protein | chr5:22327727-22331703 REVERSE LENGTH=916;AT5G55040.1 | Symbols: | DNA-binding bromodomain-containing protein | chr5:22327727-22331703 REVERSE LENGTH=916
3	3	3		AT5G55000.1;AT5G55000.2	AT5G55000.1;AT5G55000.2	AT5G55000.1 | Symbols: FIP2 | potassium channel tetramerisation domain-containing protein / pentapeptide repeat-containing protein | chr5:22318644-22321435 FORWARD LENGTH=290;AT5G55000.2 | Symbols: FIP2 | potassium channel tetramerisation domain-containing
3	3	3		AT5G54960.1	AT5G54960.1	AT5G54960.1 | Symbols: PDC2 | pyruvate decarboxylase-2 | chr5:22310858-22312681 REVERSE LENGTH=607
0	3	3		AT5G54930.2;AT5G54930.1	AT5G54930.2;AT5G54930.1	AT5G54930.2 | Symbols: | AT hook motif-containing protein | chr5:22305897-22306839 REVERSE LENGTH=283;AT5G54930.1 | Symbols: | AT hook motif-containing protein | chr5:22305897-22306839 REVERSE LENGTH=286
3	3	3		AT5G54910.1	AT5G54910.1	AT5G54910.1 | Symbols: | DEA(D/H)-box RNA helicase family protein | chr5:22298668-22301719 REVERSE LENGTH=739
3	3	3		AT5G54900.1	AT5G54900.1	AT5G54900.1 | Symbols: ATRBP45A, RBP45A | RNA-binding protein 45A | chr5:22295412-22298126 FORWARD LENGTH=387
3	3	3		AT5G54770.1	AT5G54770.1	AT5G54770.1 | Symbols: THI1, TZ, THI4 | thiazole biosynthetic enzyme, chloroplast (ARA6) (THI1) (THI4) | chr5:22246634-22247891 FORWARD LENGTH=349
3	3	3		AT5G54740.1	AT5G54740.1	AT5G54740.1 | Symbols: SESA5 | seed storage albumin 5 | chr5:22238640-22239137 REVERSE LENGTH=165
3	3	3		AT5G54640.1;AT4G27230.2;AT4G27230.1;AT1G51060.1	AT5G54640.1;AT4G27230.2;AT4G27230.1;AT1G51060.1	AT5G54640.1 | Symbols: HTA1, RAT5, ATHTA1 | Histone superfamily protein | chr5:22196540-22197279 FORWARD LENGTH=130;AT4G27230.2 | Symbols: HTA2 | histone H2A 2 | chr4:13637515-13638325 REVERSE LENGTH=131;AT4G27230.1 | Symbols: HTA2 | histone H2A 2 | chr4:1
3	3	3		AT5G54600.1;AT5G54600.2	AT5G54600.1;AT5G54600.2	AT5G54600.1 | Symbols: | Translation protein SH3-like family protein | chr5:22183046-22184403 FORWARD LENGTH=198;AT5G54600.2 | Symbols: | Translation protein SH3-like family protein | chr5:22183046-22184403 FORWARD LENGTH=179
3	3	3		AT5G54500.1;AT5G54500.2	AT5G54500.1;AT5G54500.2;AT4G27270.1	AT5G54500.1 | Symbols: FQR1 | flavodoxin-like quinone reductase 1 | chr5:22124674-22126256 FORWARD LENGTH=204;AT5G54500.2 | Symbols: FQR1 | flavodoxin-like quinone reductase 1 | chr5:22124674-22126435 FORWARD LENGTH=244
3	3	3		AT5G54430.1	AT5G54430.1	AT5G54430.1 | Symbols: ATPHOS32, PHOS32 | Adenine nucleotide alpha hydrolases-like superfamily protein | chr5:22097563-22099693 REVERSE LENGTH=242
2	3	3		AT5G54310.1	AT5G54310.1	AT5G54310.1 | Symbols: NEV, AGD5 | ARF-GAP domain 5 | chr5:22057262-22061066 REVERSE LENGTH=483
0	3	0		AT5G54300.1	AT5G54300.1	AT5G54300.1 | Symbols: | Protein of unknown function (DUF761) | chr5:22054270-22055342 REVERSE LENGTH=326
3	3	3		AT5G54270.1	AT5G54270.1	AT5G54270.1 | Symbols: LHCB3, LHCB3*1 | light-harvesting chlorophyll B-binding protein 3 | chr5:22038424-22039383 FORWARD LENGTH=265
3	3	3		AT5G54260.1	AT5G54260.1	AT5G54260.1 | Symbols: MRE11, ATMRE11 | DNA repair and meiosis protein (Mre11) | chr5:22032702-22037749 FORWARD LENGTH=720
2	3	3		AT5G54180.1	AT5G54180.1	AT5G54180.1 | Symbols: PTAC15 | plastid transcriptionally active 15 | chr5:21988544-21990183 FORWARD LENGTH=500
3	3	3		AT5G54160.1	AT5G54160.1	AT5G54160.1 | Symbols: ATOMT1, OMT1 | O-methyltransferase 1 | chr5:21982075-21984167 FORWARD LENGTH=363
3	3	3		AT5G54100.1	AT5G54100.1	AT5G54100.1 | Symbols: | SPFH/Band 7/PHB domain-containing membrane-associated protein family | chr5:21954035-21956500 REVERSE LENGTH=401
3	3	3		AT5G53930.1	AT5G53930.1	AT5G53930.1 | Symbols: | unknown protein;LOCATED IN: chloroplast;Has 1807 Blast hits to 1807 proteins in 277 species: Archae - 0;Bacteria - 0;Metazoa - 736;Fungi - 347;Plants - 385;Viruses - 0;Other Eukaryotes - 339 (source: NCBI BLink). | chr5:21
3	3	3		AT5G53800.1	AT5G53800.1	AT5G53800.1 | Symbols: | unknown protein;Has 30201 Blast hits to 17322 proteins in 780 species: Archae - 12;Bacteria - 1396;Metazoa - 17338;Fungi - 3422;Plants - 5037;Viruses - 0;Other Eukaryotes - 2996 (source: NCBI BLink). | chr5:21848180-2184993
3	3	3		AT5G53770.1	AT5G53770.1	AT5G53770.1 | Symbols: | Nucleotidyltransferase family protein | chr5:21826733-21829858 FORWARD LENGTH=530
3	3	3		AT5G53620.3;AT5G53620.2;AT5G53620.1	AT5G53620.3;AT5G53620.2;AT5G53620.1	AT5G53620.3 | Symbols: | unknown protein;INVOLVED IN: biological_process unknown;EXPRESSED IN: 23 plant structures;EXPRESSED DURING: 13 growth stages;Has 28929 Blast hits to 19542 proteins in 1425 species: Archae - 211;Bacteria - 3079;Metazoa - 1455
2	3	1		AT5G53560.1	AT5G53560.1	AT5G53560.1 | Symbols: ATB5-A, B5 #2, ATCB5-E, CB5-E | cytochrome B5 isoform E | chr5:21759628-21760353 FORWARD LENGTH=134
3	3	3		AT5G53490.2;AT5G53490.1;AT5G53490.3	AT5G53490.2;AT5G53490.1;AT5G53490.3	AT5G53490.2 | Symbols: | Tetratricopeptide repeat (TPR)-like superfamily protein | chr5:21723488-21724621 REVERSE LENGTH=235;AT5G53490.1 | Symbols: | Tetratricopeptide repeat (TPR)-like superfamily protein | chr5:21723488-21724621 REVERSE LENGTH=236;AT5G
3	3	3		AT5G53460.3;AT5G53460.2;AT5G53460.1	AT5G53460.3;AT5G53460.2;AT5G53460.1	AT5G53460.3 | Symbols: GLT1 | NADH-dependent glutamate synthase 1 | chr5:21700518-21709629 FORWARD LENGTH=2208;AT5G53460.2 | Symbols: GLT1 | NADH-dependent glutamate synthase 1 | chr5:21700518-21709629 FORWARD LENGTH=2208;AT5G53460.1 | Symbols: GLT1 | NADH
3	3	3		AT5G53440.1	AT5G53440.1	AT5G53440.1 | Symbols: | unknown protein;FUNCTIONS IN: molecular_function unknown;INVOLVED IN: biological_process unknown;LOCATED IN: cytosol;EXPRESSED IN: 25 plant structures;EXPRESSED DURING: 15 growth stages;Has 1807 Blast hits to 1807 proteins i
0	3	3		AT5G53400.1	AT5G53400.1;AT4G27890.1	AT5G53400.1 | Symbols: BOB1 | HSP20-like chaperones superfamily protein | chr5:21661588-21663383 FORWARD LENGTH=304
0	3	3		AT5G53330.1	AT5G53330.1	AT5G53330.1 | Symbols: | Ubiquitin-associated/translation elongation factor EF1B protein | chr5:21639236-21640716 FORWARD LENGTH=221
0	3	1		AT5G53120.5;AT5G53120.4;AT5G53120.3;AT5G53120.2;AT5G53120.1;AT5G53120.6	AT5G53120.5;AT5G53120.4;AT5G53120.3;AT5G53120.2;AT5G53120.1;AT5G53120.6	AT5G53120.5 | Symbols: SPDS3, SPMS | spermidine synthase 3 | chr5:21535429-21537653 FORWARD LENGTH=359;AT5G53120.4 | Symbols: SPDS3, SPMS | spermidine synthase 3 | chr5:21535429-21537653 FORWARD LENGTH=359;AT5G53120.3 | Symbols: SPDS3, SPMS | spermidine sy
3	3	3		AT5G53060.1	AT5G53060.1;AT5G53060.2	AT5G53060.1 | Symbols: | RNA-binding KH domain-containing protein | chr5:21515355-21518197 FORWARD LENGTH=652
1	3	3		AT5G53000.1	AT5G53000.1	AT5G53000.1 | Symbols: TAP46 | 2A phosphatase associated protein of 46 kD | chr5:21485654-21487869 REVERSE LENGTH=405
3	3	3		AT5G52920.1	AT5G52920.1	AT5G52920.1 | Symbols: PKP1, PKP-BETA1, PKP2 | plastidic pyruvate kinase beta subunit 1 | chr5:21463680-21466612 FORWARD LENGTH=579
1	3	3		AT5G52890.1;AT5G52890.2	AT5G52890.1;AT5G52890.2	AT5G52890.1 | Symbols: | AT hook motif-containing protein | chr5:21445040-21446197 REVERSE LENGTH=357;AT5G52890.2 | Symbols: | AT hook motif-containing protein | chr5:21445040-21446197 REVERSE LENGTH=385
2	3	3		AT5G52580.1;AT5G52580.2	AT5G52580.1;AT5G52580.2	AT5G52580.1 | Symbols: | RabGAP/TBC domain-containing protein | chr5:21338052-21342848 FORWARD LENGTH=673;AT5G52580.2 | Symbols: | RabGAP/TBC domain-containing protein | chr5:21338052-21342848 FORWARD LENGTH=690
3	3	3		AT5G52560.1	AT5G52560.1	AT5G52560.1 | Symbols: ATUSP, USP | UDP-sugar pyrophosphorylase | chr5:21331230-21334573 FORWARD LENGTH=614
3	3	3		AT5G52530.3;AT5G52530.2;AT5G52530.1	AT5G52530.3;AT5G52530.2;AT5G52530.1	AT5G52530.3 | Symbols: | dentin sialophosphoprotein-related | chr5:21318215-21320882 FORWARD LENGTH=828;AT5G52530.2 | Symbols: | dentin sialophosphoprotein-related | chr5:21318215-21320882 FORWARD LENGTH=828;AT5G52530.1 | Symbols: | dentin sialophosphop
3	3	3		AT5G52520.1	AT5G52520.1	AT5G52520.1 | Symbols: OVA6, PRORS1 | Class II aaRS and biotin synthetases superfamily protein | chr5:21311112-21313875 FORWARD LENGTH=543
3	3	3		AT5G52470.1;AT5G52470.2	AT5G52470.1;AT5G52470.2	AT5G52470.1 | Symbols: FIB1, FBR1, ATFIB1, ATFBR1, SKIP7 | fibrillarin 1 | chr5:21294290-21296509 FORWARD LENGTH=308;AT5G52470.2 | Symbols: FIB1, FBR1, ATFIB1, ATFBR1, SKIP7 | fibrillarin 1 | chr5:21294290-21296409 FORWARD LENGTH=273
2	3	2		AT5G52310.1	AT5G52310.1	AT5G52310.1 | Symbols: COR78, LTI78, RD29A, LTI140 | low-temperature-responsive protein 78 (LTI78) / desiccation-responsive protein 29A (RD29A) | chr5:21240929-21243326 FORWARD LENGTH=710
0	3	2		AT5G52300.2;AT5G52300.1	AT5G52300.2;AT5G52300.1	AT5G52300.2 | Symbols: RD29B, LTI65 | CAP160 protein | chr5:21237205-21239404 FORWARD LENGTH=618;AT5G52300.1 | Symbols: RD29B, LTI65 | CAP160 protein | chr5:21237205-21239404 FORWARD LENGTH=619
0	3	0		AT5G52230.2;AT5G52230.1	AT5G52230.2;AT5G52230.1	AT5G52230.2 | Symbols: MBD13 | methyl-CPG-binding domain protein 13 | chr5:21208097-21211634 REVERSE LENGTH=746;AT5G52230.1 | Symbols: MBD13 | methyl-CPG-binding domain protein 13 | chr5:21208097-21211634 REVERSE LENGTH=746
0	3	3		AT5G52200.1;AT5G52200.2	AT5G52200.1;AT5G52200.2	AT5G52200.1 | Symbols: | phosphoprotein phosphatase inhibitors | chr5:21202818-21204719 REVERSE LENGTH=191;AT5G52200.2 | Symbols: | phosphoprotein phosphatase inhibitors | chr5:21202818-21204017 REVERSE LENGTH=211
3	3	3		AT5G52040.1;AT5G52040.2;AT5G52040.4;AT5G52040.3	AT5G52040.1;AT5G52040.2;AT5G52040.4;AT5G52040.3	AT5G52040.1 | Symbols: ATRSP41, RS41, At-RS41 | RNA-binding (RRM/RBD/RNP motifs) family protein | chr5:21131081-21133318 FORWARD LENGTH=356;AT5G52040.2 | Symbols: ATRSP41, RS41, At-RS41 | RNA-binding (RRM/RBD/RNP motifs) family protein | chr5:21131081-2113
3	3	3		AT5G51970.2;AT5G51970.1	AT5G51970.2;AT5G51970.1	AT5G51970.2 | Symbols: | GroES-like zinc-binding alcohol dehydrogenase family protein | chr5:21111820-21113284 FORWARD LENGTH=364;AT5G51970.1 | Symbols: | GroES-like zinc-binding alcohol dehydrogenase family protein | chr5:21111820-21113284 FORWARD LENGT
3	3	3		AT5G51830.1	AT5G51830.1	AT5G51830.1 | Symbols: | pfkB-like carbohydrate kinase family protein | chr5:21069709-21071450 FORWARD LENGTH=343
3	3	3		AT5G51820.1	AT5G51820.1	AT5G51820.1 | Symbols: PGM, ATPGMP, PGM1, STF1 | phosphoglucomutase | chr5:21063531-21067933 REVERSE LENGTH=623
3	3	3		AT5G51750.1	AT5G51750.1	AT5G51750.1 | Symbols: ATSBT1.3, SBT1.3 | subtilase 1.3 | chr5:21020266-21022608 FORWARD LENGTH=780
3	3	3		AT5G51700.1	AT5G51700.1	AT5G51700.1 | Symbols: PBS2, ATRAR1, RPR2, RAR1 | protein binding;zinc ion binding | chr5:21001373-21003143 REVERSE LENGTH=226
3	3	3		AT5G51590.1	AT5G51590.1	AT5G51590.1 | Symbols: | AT hook motif DNA-binding family protein | chr5:20956863-20958929 REVERSE LENGTH=419
3	3	3		AT5G51410.3;AT5G51410.2;AT5G51410.1	AT5G51410.3;AT5G51410.2;AT5G51410.1	AT5G51410.3 | Symbols: | LUC7 N_terminus domain-containing protein | chr5:20881821-20883577 REVERSE LENGTH=334;AT5G51410.2 | Symbols: | LUC7 N_terminus domain-containing protein | chr5:20881821-20883577 REVERSE LENGTH=334;AT5G51410.1 | Symbols: | LUC7 N
0	3	3		AT5G51300.3;AT5G51300.2;AT5G51300.1	AT5G51300.3;AT5G51300.2;AT5G51300.1	AT5G51300.3 | Symbols: | splicing factor-related | chr5:20849881-20852295 REVERSE LENGTH=804;AT5G51300.2 | Symbols: | splicing factor-related | chr5:20849881-20852295 REVERSE LENGTH=804;AT5G51300.1 | Symbols: | splicing factor-related | chr5:20849881-20
3	3	3		AT5G51280.1	AT5G51280.1;AT4G33370.1	AT5G51280.1 | Symbols: | DEAD-box protein abstrakt, putative | chr5:20841456-20843645 FORWARD LENGTH=591
0	3	3		AT5G51180.2;AT5G51180.1	AT5G51180.2;AT5G51180.1	AT5G51180.2 | Symbols: | alpha/beta-Hydrolases superfamily protein | chr5:20797360-20799929 FORWARD LENGTH=357;AT5G51180.1 | Symbols: | alpha/beta-Hydrolases superfamily protein | chr5:20797360-20799929 FORWARD LENGTH=357
1	3	3		AT5G51140.1;AT5G51140.2	AT5G51140.1;AT5G51140.2	AT5G51140.1 | Symbols: | Pseudouridine synthase family protein | chr5:20784277-20786793 REVERSE LENGTH=395;AT5G51140.2 | Symbols: | Pseudouridine synthase family protein | chr5:20784103-20786793 REVERSE LENGTH=410
3	3	3		AT5G51110.2;AT5G51110.1	AT5G51110.2;AT5G51110.1	AT5G51110.2 | Symbols: | Transcriptional coactivator/pterin dehydratase | chr5:20778316-20779380 REVERSE LENGTH=193;AT5G51110.1 | Symbols: | Transcriptional coactivator/pterin dehydratase | chr5:20778316-20779380 REVERSE LENGTH=220
3	3	3		AT5G50920.1	AT5G50920.1	AT5G50920.1 | Symbols: CLPC, ATHSP93-V, HSP93-V, DCA1, CLPC1 | CLPC homologue 1 | chr5:20715710-20719800 REVERSE LENGTH=929
3	3	3		AT5G50850.1	AT5G50850.1	AT5G50850.1 | Symbols: MAB1 | Transketolase family protein | chr5:20689671-20692976 FORWARD LENGTH=363
0	3	3		AT5G50780.1	AT5G50780.1	AT5G50780.1 | Symbols: | Histidine kinase-, DNA gyrase B-, and HSP90-like ATPase family protein | chr5:20650269-20654948 FORWARD LENGTH=819
3	3	3		AT5G50750.1	AT5G50750.1	AT5G50750.1 | Symbols: RGP4 | reversibly glycosylated polypeptide 4 | chr5:20641066-20642470 FORWARD LENGTH=364
3	3	3		AT5G50700.1;AT5G50600.1	AT5G50700.1;AT5G50600.1	AT5G50700.1 | Symbols: HSD1 | hydroxysteroid dehydrogenase 1 | chr5:20623259-20624995 REVERSE LENGTH=349;AT5G50600.1 | Symbols: ATHSD1, HSD1 | hydroxysteroid dehydrogenase 1 | chr5:20589917-20591653 REVERSE LENGTH=349
3	3	3		AT5G50640.1;AT5G50530.1	AT5G50640.1;AT5G50530.1	AT5G50640.1 | Symbols: | CBS / octicosapeptide/Phox/Bemp1 (PB1) domains-containing protein | chr5:20605218-20608264 REVERSE LENGTH=548;AT5G50530.1 | Symbols: | CBS / octicosapeptide/Phox/Bemp1 (PB1) domains-containing protein | chr5:20571876-20574922 REV
3	3	3		AT5G50310.1	AT5G50310.1	AT5G50310.1 | Symbols: | Galactose oxidase/kelch repeat superfamily protein | chr5:20474562-20479281 FORWARD LENGTH=666
3	3	3		AT5G50000.1	AT5G50000.1	AT5G50000.1 | Symbols: | Protein kinase superfamily protein | chr5:20342838-20345033 REVERSE LENGTH=385
3	3	3		AT5G49930.1	AT5G49930.1	AT5G49930.1 | Symbols: emb1441 | zinc knuckle (CCHC-type) family protein | chr5:20308260-20312736 REVERSE LENGTH=1080
3	3	3		AT5G49910.1	AT5G49910.1	AT5G49910.1 | Symbols: CPHSC70-2EAT SHOCK PROTEIN 70-2, HSC70-7, cpHsc70-2 | chloroplast heat shock protein 70-2 | chr5:20303470-20306295 FORWARD LENGTH=718
0	3	3		AT5G49880.1	AT5G49880.1	AT5G49880.1 | Symbols: | mitotic checkpoint family protein | chr5:20282305-20287775 FORWARD LENGTH=726
3	3	3		AT5G49810.1	AT5G49810.1	AT5G49810.1 | Symbols: MMT | methionine S-methyltransferase | chr5:20239418-20246046 FORWARD LENGTH=1071
3	3	3		AT5G49760.1	AT5G49760.1	AT5G49760.1 | Symbols: | Leucine-rich repeat protein kinase family protein | chr5:20216679-20221052 FORWARD LENGTH=953
0	3	0		AT5G49710.1;AT5G49710.3;AT5G49710.2	AT5G49710.1;AT5G49710.3;AT5G49710.2	AT5G49710.1 | Symbols: | unknown protein;BEST Arabidopsis thaliana protein match is: unknown protein (TAIR:AT4G24590.1);Has 35333 Blast hits to 34131 proteins in 2444 species: Archae - 798;Bacteria - 22429;Metazoa - 974;Fungi - 991;Plants - 531;Vir
3	3	3		AT5G49700.1	AT5G49700.1	AT5G49700.1 | Symbols: | Predicted AT-hook DNA-binding family protein | chr5:20192599-20193429 FORWARD LENGTH=276
0	3	3		AT5G49530.1	AT5G49530.1	AT5G49530.1 | Symbols: | SIN-like family protein | chr5:20100934-20104242 FORWARD LENGTH=689
0	3	0		AT5G49510.2;AT5G49510.1	AT5G49510.2;AT5G49510.1	AT5G49510.2 | Symbols: PFD3 | prefoldin 3 | chr5:20080729-20082456 FORWARD LENGTH=195;AT5G49510.1 | Symbols: PFD3 | prefoldin 3 | chr5:20080729-20082456 FORWARD LENGTH=195
3	3	3		AT5G49460.1	AT5G49460.1	AT5G49460.1 | Symbols: ACLB-2 | ATP citrate lyase subunit B 2 | chr5:20055048-20058195 FORWARD LENGTH=608
2	3	3		AT5G49430.1	AT5G49430.1	AT5G49430.1 | Symbols: | WD40/YVTN repeat-like-containing domain;Bromodomain | chr5:20037338-20045454 REVERSE LENGTH=1677
3	3	3		AT5G49400.1	AT5G49400.1	AT5G49400.1 | Symbols: | zinc knuckle (CCHC-type) family protein | chr5:20031154-20031981 FORWARD LENGTH=275
3	3	3		AT5G49360.1	AT5G49360.1;AT1G02640.1	AT5G49360.1 | Symbols: BXL1, ATBXL1 | beta-xylosidase 1 | chr5:20012179-20016659 REVERSE LENGTH=774
3	3	3		AT5G49160.1	AT5G49160.1;AT4G13610.1	AT5G49160.1 | Symbols: MET1, MET2, METI, DDM2, DMT01, DMT1 | methyltransferase 1 | chr5:19932501-19938186 FORWARD LENGTH=1534
3	3	3		AT5G49030.1;AT5G49030.3;AT5G49030.2	AT5G49030.1;AT5G49030.3;AT5G49030.2	AT5G49030.1 | Symbols: OVA2 | tRNA synthetase class I (I, L, M and V) family protein | chr5:19875091-19882291 REVERSE LENGTH=1093;AT5G49030.3 | Symbols: OVA2 | tRNA synthetase class I (I, L, M and V) family protein | chr5:19875091-19883251 REVERSE LENGTH=1
3	3	3		AT5G48900.1	AT5G48900.1	AT5G48900.1 | Symbols: | Pectin lyase-like superfamily protein | chr5:19825240-19828909 FORWARD LENGTH=417
3	3	3		AT5G48880.1;AT5G48880.3;AT5G48880.2	AT5G48880.1;AT5G48880.3;AT5G48880.2	AT5G48880.1 | Symbols: PKT1, KAT5 | peroxisomal 3-keto-acyl-CoA thiolase 2 | chr5:19814576-19816775 REVERSE LENGTH=414;AT5G48880.3 | Symbols: | peroxisomal 3-keto-acyl-CoA thiolase 2 | chr5:19814576-19817021 REVERSE LENGTH=457;AT5G48880.2 | Symbols: PKT2,
3	3	3		AT5G48760.2;AT5G48760.1	AT5G48760.2;AT5G48760.1	AT5G48760.2 | Symbols: | Ribosomal protein L13 family protein | chr5:19771315-19772686 REVERSE LENGTH=206;AT5G48760.1 | Symbols: | Ribosomal protein L13 family protein | chr5:19771315-19772686 REVERSE LENGTH=206
1	3	3		AT5G48370.2;AT5G48370.1	AT5G48370.2;AT5G48370.1;AT2G30720.1	AT5G48370.2 | Symbols: | Thioesterase/thiol ester dehydrase-isomerase superfamily protein | chr5:19598666-19600512 REVERSE LENGTH=437;AT5G48370.1 | Symbols: | Thioesterase/thiol ester dehydrase-isomerase superfamily protein | chr5:19598666-19600512 REVER
0	3	3		AT5G48335.1	AT5G48335.1	AT5G48335.1 | Symbols: | unknown protein;FUNCTIONS IN: molecular_function unknown;INVOLVED IN: biological_process unknown;LOCATED IN: chloroplast;BEST Arabidopsis thaliana protein match is: unknown protein (TAIR:AT3G07580.1);Has 35333 Blast hits to 3
3	3	3		AT5G48300.1	AT5G48300.1	AT5G48300.1 | Symbols: ADG1, APS1 | ADP glucose pyrophosphorylase 1 | chr5:19570326-19572557 FORWARD LENGTH=520
3	3	3		AT5G48230.2;AT5G48230.1	AT5G48230.2;AT5G48230.1	AT5G48230.2 | Symbols: EMB1276, ACAT2 | acetoacetyl-CoA thiolase 2 | chr5:19552570-19555122 REVERSE LENGTH=403;AT5G48230.1 | Symbols: EMB1276, ACAT2 | acetoacetyl-CoA thiolase 2 | chr5:19552570-19555030 REVERSE LENGTH=398
3	3	3		AT5G48180.1	AT5G48180.1	AT5G48180.1 | Symbols: NSP5 | nitrile specifier protein 5 | chr5:19541283-19542358 REVERSE LENGTH=326
2	3	3		AT5G48160.2;AT5G48160.1	AT5G48160.2;AT5G48160.1	AT5G48160.2 | Symbols: OBE2 | Protein of unknown function (DUF1423) | chr5:19528019-19529820 REVERSE LENGTH=574;AT5G48160.1 | Symbols: OBE2 | Protein of unknown function (DUF1423) | chr5:19528019-19529820 REVERSE LENGTH=574
3	3	3		AT5G47930.1	AT5G47930.1	AT5G47930.1 | Symbols: | Zinc-binding ribosomal protein family protein | chr5:19406423-19407329 REVERSE LENGTH=84
0	3	3		AT5G47790.1	AT5G47790.1	AT5G47790.1 | Symbols: | SMAD/FHA domain-containing protein | chr5:19351396-19352579 FORWARD LENGTH=369
3	3	3		AT5G47770.1	AT5G47770.1;AT4G17190.1	AT5G47770.1 | Symbols: FPS1 | farnesyl diphosphate synthase 1 | chr5:19345297-19347415 FORWARD LENGTH=384
1	3	2		AT5G47760.1	AT5G47760.1	AT5G47760.1 | Symbols: PGLP2, ATPGLP2, ATPK5 | 2-phosphoglycolate phosphatase 2 | chr5:19343121-19344979 REVERSE LENGTH=301
0	3	0		AT5G47730.1;AT5G47730.3;AT5G47730.2	AT5G47730.1;AT5G47730.3;AT5G47730.2	AT5G47730.1 | Symbols: | Sec14p-like phosphatidylinositol transfer family protein | chr5:19334592-19336618 REVERSE LENGTH=341;AT5G47730.3 | Symbols: | Sec14p-like phosphatidylinositol transfer family protein | chr5:19334592-19336158 REVERSE LENGTH=286;AT
3	3	3		AT5G47690.1;AT5G47690.2;AT5G47690.3	AT5G47690.1;AT5G47690.2;AT5G47690.3	AT5G47690.1 | Symbols: | binding | chr5:19317899-19327014 FORWARD LENGTH=1605;AT5G47690.2 | Symbols: | binding | chr5:19317899-19327014 FORWARD LENGTH=1606;AT5G47690.3 | Symbols: | binding | chr5:19317899-19327014 FORWARD LENGTH=1607
3	3	3		AT5G47430.3;AT5G47430.1;AT5G47430.2	AT5G47430.3;AT5G47430.1;AT5G47430.2	AT5G47430.3 | Symbols: | DWNN domain, a CCHC-type zinc finger | chr5:19235819-19240596 REVERSE LENGTH=889;AT5G47430.1 | Symbols: | DWNN domain, a CCHC-type zinc finger | chr5:19235819-19240596 REVERSE LENGTH=892;AT5G47430.2 | Symbols: | DWNN domain, a C
3	3	3		AT5G47210.1;AT5G47210.3;AT5G47210.2	AT5G47210.1;AT5G47210.3;AT5G47210.2	AT5G47210.1 | Symbols: | Hyaluronan / mRNA binding family | chr5:19169222-19171012 REVERSE LENGTH=357;AT5G47210.3 | Symbols: | Hyaluronan / mRNA binding family | chr5:19169388-19171012 REVERSE LENGTH=301;AT5G47210.2 | Symbols: | Hyaluronan / mRNA bindin
3	3	3		AT5G47200.1	AT5G47200.1	AT5G47200.1 | Symbols: ATRABD2B, ATRAB1A, RAB1A | RAB GTPase homolog 1A | chr5:19167029-19168718 FORWARD LENGTH=202
3	3	3		AT5G47190.1	AT5G47190.1	AT5G47190.1 | Symbols: | Ribosomal protein L19 family protein | chr5:19164432-19166064 REVERSE LENGTH=229
3	3	3		AT5G47040.1	AT5G47040.1	AT5G47040.1 | Symbols: LON2 | lon protease 2 | chr5:19093356-19098678 REVERSE LENGTH=888
3	3	3		AT5G47010.1	AT5G47010.1	AT5G47010.1 | Symbols: UPF1, LBA1, ATUPF1 | RNA helicase, putative | chr5:19072009-19078856 FORWARD LENGTH=1254
3	3	3		AT5G46840.1;AT5G46840.2	AT5G46840.1;AT5G46840.2	AT5G46840.1 | Symbols: | RNA-binding (RRM/RBD/RNP motifs) family protein | chr5:19005651-19007609 FORWARD LENGTH=501;AT5G46840.2 | Symbols: | RNA-binding (RRM/RBD/RNP motifs) family protein | chr5:19006062-19007609 FORWARD LENGTH=364
3	3	3		AT5G46800.1	AT5G46800.1	AT5G46800.1 | Symbols: BOU | Mitochondrial substrate carrier family protein | chr5:18988779-18989810 REVERSE LENGTH=300
3	3	3		AT5G46750.1	AT5G46750.1	AT5G46750.1 | Symbols: AGD9 | ARF-GAP domain 9 | chr5:18969950-18971817 REVERSE LENGTH=402
3	3	3		AT5G46630.1;AT5G46630.2	AT5G46630.1;AT5G46630.2	AT5G46630.1 | Symbols: | Clathrin adaptor complexes medium subunit family protein | chr5:18920580-18923252 FORWARD LENGTH=438;AT5G46630.2 | Symbols: | Clathrin adaptor complexes medium subunit family protein | chr5:18920580-18923060 FORWARD LENGTH=441
0	3	2		AT5G46620.1	AT5G46620.1	AT5G46620.1 | Symbols: | unknown protein;BEST Arabidopsis thaliana protein match is: unknown protein (TAIR:AT4G17960.1);Has 1807 Blast hits to 1807 proteins in 277 species: Archae - 0;Bacteria - 0;Metazoa - 736;Fungi - 347;Plants - 385;Viruses - 0;
3	3	3		AT5G46580.1	AT5G46580.1	AT5G46580.1 | Symbols: | pentatricopeptide (PPR) repeat-containing protein | chr5:18897510-18899645 REVERSE LENGTH=711
3	3	3		AT5G46430.2;AT5G46430.1	AT5G46430.2;AT5G46430.1	AT5G46430.2 | Symbols: | Ribosomal protein L32e | chr5:18833429-18834409 FORWARD LENGTH=133;AT5G46430.1 | Symbols: | Ribosomal protein L32e | chr5:18833429-18834409 FORWARD LENGTH=133
0	3	0		AT5G46400.1	AT5G46400.1	AT5G46400.1 | Symbols: AT PRP39-2, PRP39-2 | Tetratricopeptide repeat (TPR)-like superfamily protein | chr5:18820032-18824522 FORWARD LENGTH=1036
3	3	3		AT5G46290.1;AT5G46290.2;AT5G46290.3	AT5G46290.1;AT5G46290.2;AT5G46290.3	AT5G46290.1 | Symbols: KASI, KAS1 | 3-ketoacyl-acyl carrier protein synthase I | chr5:18774439-18776629 REVERSE LENGTH=473;AT5G46290.2 | Symbols: KASI, KAS1 | 3-ketoacyl-acyl carrier protein synthase I | chr5:18774439-18776629 REVERSE LENGTH=418;AT5G46290.
3	3	3		AT5G46210.1	AT5G46210.1	AT5G46210.1 | Symbols: CUL4, ATCUL4 | cullin4 | chr5:18731569-18736653 REVERSE LENGTH=792
3	3	3		AT5G46110.2;AT5G46110.3;AT5G46110.1;AT5G46110.4	AT5G46110.2;AT5G46110.3;AT5G46110.1;AT5G46110.4	AT5G46110.2 | Symbols: APE2, TPT | Glucose-6-phosphate/phosphate translocator-related | chr5:18698019-18700212 FORWARD LENGTH=297;AT5G46110.3 | Symbols: APE2, TPT | Glucose-6-phosphate/phosphate translocator-related | chr5:18697606-18700212 FORWARD LENGTH=
3	3	3		AT5G46070.1	AT5G46070.1	AT5G46070.1 | Symbols: | Guanylate-binding family protein | chr5:18683468-18688397 FORWARD LENGTH=1082
3	3	3		AT5G45950.1	AT5G45950.1	AT5G45950.1 | Symbols: | GDSL-like Lipase/Acylhydrolase superfamily protein | chr5:18634155-18636512 FORWARD LENGTH=357
3	3	3		AT5G45930.1	AT5G45930.1	AT5G45930.1 | Symbols: CHLI2, CHL I2, CHLI-2 | magnesium chelatase i2 | chr5:18628095-18629565 FORWARD LENGTH=418
3	3	3		AT5G45775.1;AT5G45775.2;AT4G18730.1;AT3G58700.1;AT2G42740.1	AT5G45775.1;AT5G45775.2;AT4G18730.1;AT3G58700.1;AT2G42740.1	AT5G45775.1 | Symbols: | Ribosomal L5P family protein | chr5:18565281-18566377 REVERSE LENGTH=172;AT5G45775.2 | Symbols: | Ribosomal L5P family protein | chr5:18565281-18566496 REVERSE LENGTH=182;AT4G18730.1 | Symbols: RPL16B | ribosomal protein L16B | c
3	3	3		AT5G45690.1	AT5G45690.1	AT5G45690.1 | Symbols: | Protein of unknown function (DUF1264) | chr5:18535139-18536259 REVERSE LENGTH=247
0	3	3		AT5G45600.2;AT5G45600.1	AT5G45600.2;AT5G45600.1	AT5G45600.2 | Symbols: GAS41 | YEATS family protein | chr5:18488059-18489666 FORWARD LENGTH=267;AT5G45600.1 | Symbols: GAS41, TAF14B | YEATS family protein | chr5:18488059-18489666 FORWARD LENGTH=268
3	3	3		AT5G45590.1	AT5G45590.1	AT5G45590.1 | Symbols: | Ribosomal protein L35 | chr5:18484643-18486227 REVERSE LENGTH=173
1	3	2		AT5G45500.2;AT5G45500.1	AT5G45500.2;AT5G45500.1	AT5G45500.2 | Symbols: | RNI-like superfamily protein | chr5:18432636-18434951 REVERSE LENGTH=771;AT5G45500.1 | Symbols: | RNI-like superfamily protein | chr5:18432636-18434951 REVERSE LENGTH=771
1	3	3		AT5G45490.2;AT5G45490.1	AT5G45490.2;AT5G45490.1;AT5G45440.1	AT5G45490.2 | Symbols: | P-loop containing nucleoside triphosphate hydrolases superfamily protein | chr5:18431064-18432128 FORWARD LENGTH=354;AT5G45490.1 | Symbols: | P-loop containing nucleoside triphosphate hydrolases superfamily protein | chr5:1843106
3	3	3		AT5G45390.1	AT5G45390.1	AT5G45390.1 | Symbols: CLPP4, NCLPP4 | CLP protease P4 | chr5:18396351-18397586 FORWARD LENGTH=292
0	3	2		AT5G45330.1	AT5G45330.1	AT5G45330.1 | Symbols: DCP5-L | decapping 5-like | chr5:18363701-18366544 REVERSE LENGTH=571
3	3	3		AT5G45280.2;AT5G45280.1	AT5G45280.2;AT5G45280.1	AT5G45280.2 | Symbols: | Pectinacetylesterase family protein | chr5:18346862-18349488 FORWARD LENGTH=391;AT5G45280.1 | Symbols: | Pectinacetylesterase family protein | chr5:18346862-18349432 FORWARD LENGTH=370
2	3	3		AT5G45190.1;AT5G45190.2	AT5G45190.1;AT5G45190.2;AT4G19600.1	AT5G45190.1 | Symbols: | Cyclin family protein | chr5:18277808-18280733 REVERSE LENGTH=579;AT5G45190.2 | Symbols: | Cyclin family protein | chr5:18277808-18280733 REVERSE LENGTH=590
3	3	3		AT5G44800.1	AT5G44800.1	AT5G44800.1 | Symbols: CHR4, PKR1 | chromatin remodeling 4 | chr5:18083659-18092162 REVERSE LENGTH=2223
3	3	3		AT5G44500.2;AT5G44500.1;AT4G20440.4;AT4G20440.3;AT4G20440.2;AT4G20440.1	AT5G44500.2;AT5G44500.1;AT4G20440.4;AT4G20440.3;AT4G20440.2;AT4G20440.1	AT5G44500.2 | Symbols: | Small nuclear ribonucleoprotein family protein | chr5:17927505-17928269 FORWARD LENGTH=254;AT5G44500.1 | Symbols: | Small nuclear ribonucleoprotein family protein | chr5:17927505-17928269 FORWARD LENGTH=254;AT4G20440.4 | Symbols:
3	3	3		AT5G44340.1	AT5G44340.1	AT5G44340.1 | Symbols: TUB4 | tubulin beta chain 4 | chr5:17859442-17860994 REVERSE LENGTH=444
3	3	3		AT5G44320.1;AT4G20980.4;AT4G20980.3;AT4G20980.2;AT4G20980.1	AT5G44320.1;AT4G20980.4;AT4G20980.3;AT4G20980.2;AT4G20980.1	AT5G44320.1 | Symbols: | Eukaryotic translation initiation factor 3 subunit 7 (eIF-3) | chr5:17854901-17856667 REVERSE LENGTH=588;AT4G20980.4 | Symbols: | Eukaryotic translation initiation factor 3 subunit 7 (eIF-3) | chr4:11216997-11218772 FORWARD LENGT
2	3	2		AT5G44310.1;AT5G44310.2	AT5G44310.1;AT5G44310.2	AT5G44310.1 | Symbols: | Late embryogenesis abundant protein (LEA) family protein | chr5:17847998-17848885 REVERSE LENGTH=295;AT5G44310.2 | Symbols: | Late embryogenesis abundant protein (LEA) family protein | chr5:17847998-17849436 REVERSE LENGTH=331
1	3	3		AT5G44280.1;AT5G44280.2	AT5G44280.1;AT5G44280.2	AT5G44280.1 | Symbols: ATRING1A, RING1A | RING 1A | chr5:17836115-17839114 REVERSE LENGTH=522;AT5G44280.2 | Symbols: ATRING1A, RING1A | RING 1A | chr5:17836115-17839114 REVERSE LENGTH=525
1	3	3		AT5G44200.2;AT5G44200.1	AT5G44200.2;AT5G44200.1	AT5G44200.2 | Symbols: CBP20, ATCBP20 | CAP-binding protein 20 | chr5:17802062-17803875 REVERSE LENGTH=257;AT5G44200.1 | Symbols: CBP20, ATCBP20 | CAP-binding protein 20 | chr5:17802062-17803875 REVERSE LENGTH=257
3	3	3		AT5G44180.1;AT5G44180.2	AT5G44180.1;AT5G44180.2	AT5G44180.1 | Symbols: | Homeodomain-like transcriptional regulator | chr5:17783172-17789872 FORWARD LENGTH=1694;AT5G44180.2 | Symbols: | Homeodomain-like transcriptional regulator | chr5:17783172-17789872 FORWARD LENGTH=1507
3	3	3		AT5G44120.3;AT5G44120.2;AT5G44120.1	AT5G44120.3;AT5G44120.2;AT5G44120.1	AT5G44120.3 | Symbols: CRA1, ATCRA1, CRU1 | RmlC-like cupins superfamily protein | chr5:17756460-17758246 REVERSE LENGTH=472;AT5G44120.2 | Symbols: CRA1, ATCRA1, CRU1 | RmlC-like cupins superfamily protein | chr5:17756460-17757811 REVERSE LENGTH=368;AT5G44
3	3	3		AT5G44110.1;AT5G44110.2;AT5G44110.3	AT5G44110.1;AT5G44110.2;AT5G44110.3;AT1G03905.1	AT5G44110.1 | Symbols: ATPOP1, ATNAP2, POP1 | P-loop containing nucleoside triphosphate hydrolases superfamily protein | chr5:17754222-17755672 REVERSE LENGTH=282;AT5G44110.2 | Symbols: ATPOP1, ATNAP2, POP1 | P-loop containing nucleoside triphosphate hydro
3	3	3		AT5G44090.1	AT5G44090.1	AT5G44090.1 | Symbols: | Calcium-binding EF-hand family protein | chr5:17743264-17747909 REVERSE LENGTH=538
0	3	0		AT5G44060.1	AT5G44060.1	AT5G44060.1 | Symbols: | unknown protein;BEST Arabidopsis thaliana protein match is: unknown protein (TAIR:AT1G04000.1);Has 1807 Blast hits to 1807 proteins in 277 species: Archae - 0;Bacteria - 0;Metazoa - 736;Fungi - 347;Plants - 385;Viruses - 0;
3	3	3		AT5G44020.1	AT5G44020.1	AT5G44020.1 | Symbols: | HAD superfamily, subfamily IIIB acid phosphatase | chr5:17712433-17714046 FORWARD LENGTH=272
3	3	3		AT5G43960.1;AT5G43960.2	AT5G43960.1;AT5G43960.2	AT5G43960.1 | Symbols: | Nuclear transport factor 2 (NTF2) family protein with RNA binding (RRM-RBD-RNP motifs) domain | chr5:17689154-17691653 REVERSE LENGTH=450;AT5G43960.2 | Symbols: | Nuclear transport factor 2 (NTF2) family protein with RNA binding
3	3	3		AT5G43940.1;AT5G43940.2	AT5G43940.1;AT5G43940.2	AT5G43940.1 | Symbols: HOT5, ADH2, GSNOR, ATGSNOR1, PAR2 | GroES-like zinc-binding dehydrogenase family protein | chr5:17684265-17686379 FORWARD LENGTH=379;AT5G43940.2 | Symbols: HOT5 | GroES-like zinc-binding dehydrogenase family protein | chr5:17684265-1
3	3	3		AT5G43900.1;AT5G43900.3;AT5G43900.2	AT5G43900.1;AT5G43900.3;AT5G43900.2	AT5G43900.1 | Symbols: MYA2, ATMYA2, XI-2, XI-6 | myosin 2 | chr5:17657241-17666653 REVERSE LENGTH=1505;AT5G43900.3 | Symbols: MYA2 | myosin 2 | chr5:17657241-17667413 REVERSE LENGTH=1565;AT5G43900.2 | Symbols: MYA2 | myosin 2 | chr5:17657241-17667413 REVE
3	3	3		AT5G43830.1	AT5G43830.1	AT5G43830.1 | Symbols: | Aluminium induced protein with YGL and LRDR motifs | chr5:17622593-17624239 REVERSE LENGTH=251
0	3	3		AT5G43630.1	AT5G43630.1	AT5G43630.1 | Symbols: TZP | zinc knuckle (CCHC-type) family protein | chr5:17527261-17530207 FORWARD LENGTH=831
1	3	1		AT5G43560.2;AT5G43560.1	AT5G43560.2;AT5G43560.1	AT5G43560.2 | Symbols: | TRAF-like superfamily protein | chr5:17501043-17505526 FORWARD LENGTH=1055;AT5G43560.1 | Symbols: | TRAF-like superfamily protein | chr5:17501043-17505526 FORWARD LENGTH=1055
1	3	2		AT5G43450.1	AT5G43450.1	AT5G43450.1 | Symbols: | 2-oxoglutarate (2OG) and Fe(II)-dependent oxygenase superfamily protein | chr5:17457321-17458714 REVERSE LENGTH=362
2	3	1		AT5G43440.1;AT5G43440.2	AT5G43440.1;AT5G43440.2	AT5G43440.1 | Symbols: | 2-oxoglutarate (2OG) and Fe(II)-dependent oxygenase superfamily protein | chr5:17455356-17456608 REVERSE LENGTH=365;AT5G43440.2 | Symbols: | 2-oxoglutarate (2OG) and Fe(II)-dependent oxygenase superfamily protein | chr5:17455660-
0	3	3		AT5G43130.1;AT5G43130.2	AT5G43130.1;AT5G43130.2;AT1G27720.1	AT5G43130.1 | Symbols: TAF4, TAF4B | TBP-associated factor 4 | chr5:17315608-17321144 REVERSE LENGTH=823;AT5G43130.2 | Symbols: TAF4 | TBP-associated factor 4 | chr5:17315608-17321144 REVERSE LENGTH=852
0	3	2		AT5G43070.1	AT5G43070.1	AT5G43070.1 | Symbols: WPP1 | WPP domain protein 1 | chr5:17289259-17289726 REVERSE LENGTH=155
3	3	3		AT5G43060.1	AT5G43060.1	AT5G43060.1 | Symbols: | Granulin repeat cysteine protease family protein | chr5:17269784-17272117 REVERSE LENGTH=463
3	3	3		AT5G42980.1	AT5G42980.1	AT5G42980.1 | Symbols: ATTRX3, ATH3, ATTRXH3, TRXH3, TRX3 | thioredoxin 3 | chr5:17242772-17243718 FORWARD LENGTH=118
3	3	3		AT5G42970.1	AT5G42970.1	AT5G42970.1 | Symbols: COP8, FUS4, EMB134, COP14, CSN4, FUS8, ATS4 | Proteasome component (PCI) domain protein | chr5:17237470-17240649 REVERSE LENGTH=397
3	3	3		AT5G42960.1	AT5G42960.1	AT5G42960.1 | Symbols: | unknown protein;FUNCTIONS IN: molecular_function unknown;INVOLVED IN: biological_process unknown;LOCATED IN: mitochondrion, chloroplast, plastid, chloroplast envelope;EXPRESSED IN: 24 plant structures;EXPRESSED DURING: 13 gro
3	3	3		AT5G42950.1	AT5G42950.1	AT5G42950.1 | Symbols: | GYF domain-containing protein | chr5:17224436-17231044 FORWARD LENGTH=1714
3	3	3		AT5G42920.2;AT5G42920.1	AT5G42920.2;AT5G42920.1	AT5G42920.2 | Symbols: THO5, AtTHO5 | THO complex, subunit 5 | chr5:17206310-17209522 REVERSE LENGTH=819;AT5G42920.1 | Symbols: THO5, AtTHO5 | THO complex, subunit 5 | chr5:17206310-17209106 REVERSE LENGTH=702
3	3	3		AT5G42820.2;AT5G42820.1;AT1G27650.1;AT1G27650.2	AT5G42820.2;AT5G42820.1;AT1G27650.1;AT1G27650.2;AT3G44785.1	AT5G42820.2 | Symbols: ATU2AF35B, U2AF35B | Zinc finger C-x8-C-x5-C-x3-H type family protein | chr5:17170445-17171296 REVERSE LENGTH=283;AT5G42820.1 | Symbols: ATU2AF35B, U2AF35B | Zinc finger C-x8-C-x5-C-x3-H type family protein | chr5:17170445-17171296 R
3	3	3		AT5G42740.1	AT5G42740.1	AT5G42740.1 | Symbols: | Sugar isomerase (SIS) family protein | chr5:17136080-17140622 FORWARD LENGTH=560
3	3	3		AT5G42540.1;AT5G42540.2	AT5G42540.1;AT5G42540.2	AT5G42540.1 | Symbols: XRN2, AtXRN2 | exoribonuclease 2 | chr5:17007513-17014534 FORWARD LENGTH=1012;AT5G42540.2 | Symbols: XRN2 | exoribonuclease 2 | chr5:17007513-17014534 FORWARD LENGTH=1023
3	3	3		AT5G42520.1;AT5G42520.2	AT5G42520.1;AT5G42520.2;AT5G42520.3	AT5G42520.1 | Symbols: BPC6, BBR/BPC6, ATBPC6 | basic pentacysteine 6 | chr5:17001287-17002466 FORWARD LENGTH=342;AT5G42520.2 | Symbols: BPC6, BBR/BPC6, ATBPC6 | basic pentacysteine 6 | chr5:17001287-17002466 FORWARD LENGTH=338
1	3	1		AT5G42470.1	AT5G42470.1	AT5G42470.1 | Symbols: | CONTAINS InterPro DOMAIN/s: Brain/reproductive organ-expressed protein (InterPro:IPR010358);Has 35333 Blast hits to 34131 proteins in 2444 species: Archae - 798;Bacteria - 22429;Metazoa - 974;Fungi - 991;Plants - 531;Viruses
1	3	2		AT5G42400.1	AT5G42400.1	AT5G42400.1 | Symbols: ATXR7, SDG25 | SET domain protein 25 | chr5:16954469-16960671 REVERSE LENGTH=1423
3	3	3		AT5G42390.1	AT5G42390.1	AT5G42390.1 | Symbols: | Insulinase (Peptidase family M16) family protein | chr5:16945308-16952647 FORWARD LENGTH=1265
3	2	3		AT5G42310.1	AT5G42310.1	AT5G42310.1 | Symbols: | Pentatricopeptide repeat (PPR-like) superfamily protein | chr5:16915860-16918238 FORWARD LENGTH=709
3	3	3		AT5G42270.1;AT1G50250.1	AT5G42270.1;AT1G50250.1	AT5G42270.1 | Symbols: VAR1, FTSH5 | FtsH extracellular protease family | chr5:16902659-16905102 FORWARD LENGTH=704;AT1G50250.1 | Symbols: FTSH1 | FTSH protease 1 | chr1:18614398-18616930 REVERSE LENGTH=716
3	3	3		AT5G42080.1;AT5G42080.3;AT5G42080.2	AT5G42080.1;AT5G42080.3;AT5G42080.2	AT5G42080.1 | Symbols: ADL1, ADL1A, AG68, DRP1A, RSW9, DL1 | dynamin-like protein | chr5:16820661-16824536 REVERSE LENGTH=610;AT5G42080.3 | Symbols: DL1 | dynamin-like protein | chr5:16820661-16824536 REVERSE LENGTH=604;AT5G42080.2 | Symbols: ADL1, ADL1A,
3	3	3		AT5G42020.1;AT5G42020.2	AT5G42020.1;AT5G42020.2	AT5G42020.1 | Symbols: BIP, BIP2 | Heat shock protein 70 (Hsp 70) family protein | chr5:16807697-16810480 REVERSE LENGTH=668;AT5G42020.2 | Symbols: BIP | Heat shock protein 70 (Hsp 70) family protein | chr5:16807697-16810480 REVERSE LENGTH=613
3	3	3		AT5G41880.1	AT5G41880.1	AT5G41880.1 | Symbols: POLA3, POLA4 | DNA primases;DNA primases | chr5:16761071-16764074 FORWARD LENGTH=451
3	3	3		AT5G41770.1	AT5G41770.1;AT3G13210.1;AT5G45990.1;AT3G51110.1	AT5G41770.1 | Symbols: | crooked neck protein, putative / cell cycle protein, putative | chr5:16718021-16720936 FORWARD LENGTH=705
3	3	3		AT5G41670.2;AT5G41670.1	AT5G41670.2;AT5G41670.1	AT5G41670.2 | Symbols: | 6-phosphogluconate dehydrogenase family protein | chr5:16665647-16667110 REVERSE LENGTH=487;AT5G41670.1 | Symbols: | 6-phosphogluconate dehydrogenase family protein | chr5:16665647-16667110 REVERSE LENGTH=487
2	3	3		AT5G41520.1;AT5G41520.2	AT5G41520.1;AT5G41520.2	AT5G41520.1 | Symbols: | RNA binding Plectin/S10 domain-containing protein | chr5:16609377-16610583 REVERSE LENGTH=180;AT5G41520.2 | Symbols: | RNA binding Plectin/S10 domain-containing protein | chr5:16609377-16610203 REVERSE LENGTH=134
3	3	3		AT5G41370.1	AT5G41370.1	AT5G41370.1 | Symbols: XPB1, ATXPB1 | homolog of xeroderma pigmentosum complementation group B 1 | chr5:16551337-16555792 FORWARD LENGTH=767
1	3	3		AT5G41220.1	AT5G41220.1	AT5G41220.1 | Symbols: ATGSTT3, GST10C, GSTT3 | glutathione S-transferase THETA 3 | chr5:16494560-16496969 REVERSE LENGTH=590
3	3	3		AT5G41210.1	AT5G41210.1	AT5G41210.1 | Symbols: ATGSTT1, GST10, GSTT1 | glutathione S-transferase THETA 1 | chr5:16492550-16493884 REVERSE LENGTH=245
2	3	2		AT5G41190.1	AT5G41190.1	AT5G41190.1 | Symbols: | CONTAINS InterPro DOMAIN/s: Nin one binding (NOB1) Zn-ribbon like (InterPro:IPR014881), D-site 20S pre-rRNA nuclease (InterPro:IPR017117);Has 1807 Blast hits to 1807 proteins in 277 species: Archae - 0;Bacteria - 0;Metazoa - 73
1	3	3		AT5G41150.1;AT5G41150.2	AT5G41150.1;AT5G41150.2	AT5G41150.1 | Symbols: UVH1, ATRAD1, RAD1 | Restriction endonuclease, type II-like superfamily protein | chr5:16473044-16476919 REVERSE LENGTH=956;AT5G41150.2 | Symbols: UVH1, ATRAD1, RAD1 | Restriction endonuclease, type II-like superfamily protein | chr5
3	3	3		AT5G41020.1	AT5G41020.1	AT5G41020.1 | Symbols: | myb family transcription factor | chr5:16425883-16427649 REVERSE LENGTH=588
3	3	3		AT5G40950.1	AT5G40950.1	AT5G40950.1 | Symbols: RPL27 | ribosomal protein large subunit 27 | chr5:16410866-16411845 FORWARD LENGTH=198
3	3	3		AT5G40870.1	AT5G40870.1	AT5G40870.1 | Symbols: ATUK/UPRT1, UKL1, UK/UPRT1 | uridine kinase/uracil phosphoribosyltransferase 1 | chr5:16375021-16378384 FORWARD LENGTH=486
3	3	3		AT5G40770.1	AT5G40770.1	AT5G40770.1 | Symbols: ATPHB3, PHB3 | prohibitin 3 | chr5:16315589-16316621 REVERSE LENGTH=277
3	3	3		AT5G40760.1	AT5G40760.1	AT5G40760.1 | Symbols: G6PD6 | glucose-6-phosphate dehydrogenase 6 | chr5:16311284-16314556 FORWARD LENGTH=515
3	3	3		AT5G40490.1	AT5G40490.1	AT5G40490.1 | Symbols: | RNA-binding (RRM/RBD/RNP motifs) family protein | chr5:16225483-16227423 FORWARD LENGTH=423
3	3	3		AT5G40420.1	AT5G40420.1	AT5G40420.1 | Symbols: OLEO2, OLE2 | oleosin 2 | chr5:16173622-16174740 REVERSE LENGTH=199
0	3	3		AT5G40370.1;AT5G40370.2	AT5G40370.1;AT5G40370.2	AT5G40370.1 | Symbols: | Glutaredoxin family protein | chr5:16147826-16149052 REVERSE LENGTH=111;AT5G40370.2 | Symbols: | Glutaredoxin family protein | chr5:16147826-16148900 REVERSE LENGTH=136
3	3	3		AT5G40340.1	AT5G40340.1	AT5G40340.1 | Symbols: | Tudor/PWWP/MBT superfamily protein | chr5:16131654-16134680 REVERSE LENGTH=1008
0	3	2		AT5G40270.1	AT5G40270.1;AT5G40290.1	AT5G40270.1 | Symbols: | HD domain-containing metal-dependent phosphohydrolase family protein | chr5:16093394-16097093 REVERSE LENGTH=473
3	3	3		AT5G40200.1	AT5G40200.1	AT5G40200.1 | Symbols: DegP9 | DegP protease 9 | chr5:16070402-16073101 FORWARD LENGTH=592
3	3	3		AT5G39740.2;AT5G39740.1	AT5G39740.2;AT5G39740.1	AT5G39740.2 | Symbols: RPL5B | ribosomal protein L5 B | chr5:15903484-15905185 FORWARD LENGTH=301;AT5G39740.1 | Symbols: OLI7, RPL5B | ribosomal protein L5 B | chr5:15903365-15905185 FORWARD LENGTH=301
0	3	2		AT5G39730.1	AT5G39730.1	AT5G39730.1 | Symbols: | AIG2-like (avirulence induced gene) family protein | chr5:15901740-15902624 FORWARD LENGTH=172
3	3	2		AT5G39660.2;AT5G39660.1	AT5G39660.2;AT5G39660.1	AT5G39660.2 | Symbols: CDF2 | cycling DOF factor 2 | chr5:15878920-15880712 FORWARD LENGTH=457;AT5G39660.1 | Symbols: CDF2 | cycling DOF factor 2 | chr5:15878920-15880712 FORWARD LENGTH=457
3	3	3		AT5G39590.1	AT5G39590.1	AT5G39590.1 | Symbols: | TLD-domain containing nucleolar protein | chr5:15851483-15853768 FORWARD LENGTH=542
3	3	3		AT5G39580.1;AT5G39580.2	AT5G39580.1;AT5G39580.2	AT5G39580.1 | Symbols: | Peroxidase superfamily protein | chr5:15847281-15849027 REVERSE LENGTH=319;AT5G39580.2 | Symbols: | Peroxidase superfamily protein | chr5:15847531-15849027 REVERSE LENGTH=236
3	3	3		AT5G39570.1	AT5G39570.1	AT5G39570.1 | Symbols: | FUNCTIONS IN: molecular_function unknown;INVOLVED IN: biological_process unknown;LOCATED IN: cytosol, nucleus;EXPRESSED IN: 25 plant structures;EXPRESSED DURING: 14 growth stages;BEST Arabidopsis thaliana protein match is: gl
3	3	3		AT5G39410.1	AT5G39410.1	AT5G39410.1 | Symbols: | Saccharopine dehydrogenase | chr5:15768415-15770274 REVERSE LENGTH=454
3	3	3		AT5G39320.1	AT5G39320.1	AT5G39320.1 | Symbols: | UDP-glucose 6-dehydrogenase family protein | chr5:15743254-15744696 FORWARD LENGTH=480
0	3	1		AT5G38890.1	AT5G38890.1	AT5G38890.1 | Symbols: | Nucleic acid-binding, OB-fold-like protein | chr5:15569507-15570898 FORWARD LENGTH=191
3	3	3		AT5G38840.1	AT5G38840.1	AT5G38840.1 | Symbols: | SMAD/FHA domain-containing protein | chr5:15551329-15554846 FORWARD LENGTH=735
3	3	3		AT5G38830.1	AT5G38830.1	AT5G38830.1 | Symbols: | Cysteinyl-tRNA synthetase, class Ia family protein | chr5:15545764-15548094 REVERSE LENGTH=511
3	3	3		AT5G38720.1	AT5G38720.1	AT5G38720.1 | Symbols: | unknown protein;Has 13419 Blast hits to 9093 proteins in 698 species: Archae - 38;Bacteria - 1038;Metazoa - 4949;Fungi - 1086;Plants - 485;Viruses - 44;Other Eukaryotes - 5779 (source: NCBI BLink). | chr5:15508417-15510472
3	3	3		AT5G38660.1;AT5G38660.2	AT5G38660.1;AT5G38660.2	AT5G38660.1 | Symbols: APE1 | acclimation of photosynthesis to environment | chr5:15473285-15475497 REVERSE LENGTH=286;AT5G38660.2 | Symbols: APE1 | acclimation of photosynthesis to environment | chr5:15471208-15475497 REVERSE LENGTH=431
3	3	3		AT5G38600.1	AT5G38600.1	AT5G38600.1 | Symbols: | Proline-rich spliceosome-associated (PSP) family protein / zinc knuckle (CCHC-type) family protein | chr5:15457386-15460466 FORWARD LENGTH=532
3	3	3		AT5G38520.1;AT5G38520.2	AT5G38520.1;AT5G38520.2	AT5G38520.1 | Symbols: | alpha/beta-Hydrolases superfamily protein | chr5:15421605-15423234 FORWARD LENGTH=362;AT5G38520.2 | Symbols: | alpha/beta-Hydrolases superfamily protein | chr5:15421605-15423234 FORWARD LENGTH=374
3	3	3		AT5G38480.1;AT5G38480.2	AT5G38480.1;AT5G38480.2	AT5G38480.1 | Symbols: GRF3, RCI1 | general regulatory factor 3 | chr5:15410277-15411285 FORWARD LENGTH=255;AT5G38480.2 | Symbols: GRF3, RCI1 | general regulatory factor 3 | chr5:15410277-15411285 FORWARD LENGTH=254
3	3	3		AT5G38430.1	AT5G38430.1	AT5G38430.1 | Symbols: | Ribulose bisphosphate carboxylase (small chain) family protein | chr5:15384350-15385155 REVERSE LENGTH=181
3	3	3		AT5G38420.1;AT5G38410.1;AT5G38410.3;AT5G38410.2	AT5G38420.1;AT5G38410.1;AT5G38410.3;AT5G38410.2	AT5G38420.1 | Symbols: | Ribulose bisphosphate carboxylase (small chain) family protein | chr5:15381203-15381978 REVERSE LENGTH=181;AT5G38410.1 | Symbols: | Ribulose bisphosphate carboxylase (small chain) family protein | chr5:15377501-15378306 REVERSE L
3	3	3		AT5G37830.1	AT5G37830.1	AT5G37830.1 | Symbols: OXP1 | oxoprolinase 1 | chr5:15056635-15060525 REVERSE LENGTH=1266
3	3	3		AT5G37780.1;AT1G66410.1;AT1G66410.2;AT5G37780.2;AT5G37780.3	AT5G37780.1;AT1G66410.1;AT1G66410.2;AT5G37780.2;AT5G37780.3	AT5G37780.1 | Symbols: CAM1, TCH1, ACAM-1 | calmodulin 1 | chr5:15004769-15006117 REVERSE LENGTH=149;AT1G66410.1 | Symbols: CAM4, ACAM-4 | calmodulin 4 | chr1:24774431-24775785 REVERSE LENGTH=149;AT1G66410.2 | Symbols: CAM4 | calmodulin 4 | chr1:24774431-2
3	3	3		AT5G37720.2;AT5G37720.1	AT5G37720.2;AT5G37720.1	AT5G37720.2 | Symbols: ALY4 | ALWAYS EARLY 4 | chr5:14981805-14983978 REVERSE LENGTH=280;AT5G37720.1 | Symbols: ALY4 | ALWAYS EARLY 4 | chr5:14981805-14983978 REVERSE LENGTH=288
3	3	3		AT5G37600.1	AT5G37600.1;AT5G16570.1	AT5G37600.1 | Symbols: ATGSR1, GLN1;1, GSR 1, ATGLN1;1 | glutamine synthase clone R1 | chr5:14933574-14935656 REVERSE LENGTH=356
3	3	3		AT5G37510.1;AT5G37510.2	AT5G37510.1;AT5G37510.2	AT5G37510.1 | Symbols: EMB1467, CI76 | NADH-ubiquinone dehydrogenase, mitochondrial, putative | chr5:14897490-14900352 FORWARD LENGTH=745;AT5G37510.2 | Symbols: EMB1467, CI76 | NADH-ubiquinone dehydrogenase, mitochondrial, putative | chr5:14897490-14900447
0	3	3		AT5G37475.1	AT5G37475.1	AT5G37475.1 | Symbols: | Translation initiation factor eIF3 subunit | chr5:14866328-14867749 REVERSE LENGTH=225
0	3	1		AT5G37020.2;AT5G37020.1	AT5G37020.2;AT5G37020.1;AT2G33860.1;AT5G60450.1;AT1G19850.1	AT5G37020.2 | Symbols: ARF8 | auxin response factor 8 | chr5:14630151-14633916 FORWARD LENGTH=773;AT5G37020.1 | Symbols: ARF8, ATARF8 | auxin response factor 8 | chr5:14630151-14634106 FORWARD LENGTH=811
3	2	3		AT5G36950.1	AT5G36950.1	AT5G36950.1 | Symbols: DegP10 | DegP protease 10 | chr5:14594992-14598216 FORWARD LENGTH=586
3	3	3		AT5G36880.1;AT5G36880.2	AT5G36880.1;AT5G36880.2	AT5G36880.1 | Symbols: ACS | acetyl-CoA synthetase | chr5:14534961-14539084 REVERSE LENGTH=693;AT5G36880.2 | Symbols: ACS | acetyl-CoA synthetase | chr5:14534961-14540296 REVERSE LENGTH=743
3	3	3		AT5G36230.1	AT5G36230.1	AT5G36230.1 | Symbols: | ARM repeat superfamily protein | chr5:14273519-14276773 FORWARD LENGTH=411
1	3	3		AT5G35980.1;AT5G35980.2	AT5G35980.1;AT5G35980.2	AT5G35980.1 | Symbols: YAK1 | yeast YAK1-related gene 1 | chr5:14128551-14135984 FORWARD LENGTH=956;AT5G35980.2 | Symbols: YAK1 | yeast YAK1-related gene 1 | chr5:14128551-14134354 FORWARD LENGTH=787
3	3	3		AT5G35910.1	AT5G35910.1	AT5G35910.1 | Symbols: | Polynucleotidyl transferase, ribonuclease H fold protein with HRDC domain | chr5:14029871-14035405 REVERSE LENGTH=870
3	3	3		AT5G35840.1	AT5G35840.1;AT1G09570.2;AT1G09570.1	AT5G35840.1 | Symbols: PHYC | phytochrome C | chr5:14008049-14011619 FORWARD LENGTH=1111
3	3	3		AT5G35790.1	AT5G35790.1	AT5G35790.1 | Symbols: G6PD1 | glucose-6-phosphate dehydrogenase 1 | chr5:13956879-13959686 REVERSE LENGTH=576
3	3	3		AT5G35700.1	AT5G35700.1;AT4G26700.3;AT2G04750.1;AT5G48460.1;AT4G26700.2;AT4G26700.1	AT5G35700.1 | Symbols: FIM2, FIM5 | fimbrin-like protein 2 | chr5:13872833-13876432 REVERSE LENGTH=687
3	3	3		AT5G35680.2;AT5G35680.1;AT2G04520.1;AT5G35680.3	AT5G35680.2;AT5G35680.1;AT2G04520.1;AT5G35680.3	AT5G35680.2 | Symbols: | Nucleic acid-binding, OB-fold-like protein | chr5:13858152-13858589 REVERSE LENGTH=145;AT5G35680.1 | Symbols: | Nucleic acid-binding, OB-fold-like protein | chr5:13858152-13858589 REVERSE LENGTH=145;AT2G04520.1 | Symbols: | Nucl
3	3	3		AT5G35660.1	AT5G35660.1	AT5G35660.1 | Symbols: | Glycine-rich protein family | chr5:13852609-13853717 REVERSE LENGTH=343
3	3	3		AT5G35630.3;AT5G35630.2;AT5G35630.1	AT5G35630.3;AT5G35630.2;AT5G35630.1	AT5G35630.3 | Symbols: GS2, GLN2, ATGSL1 | glutamine synthetase 2 | chr5:13831220-13833239 FORWARD LENGTH=430;AT5G35630.2 | Symbols: GS2, GLN2, ATGSL1 | glutamine synthetase 2 | chr5:13831220-13833239 FORWARD LENGTH=430;AT5G35630.1 | Symbols: GS2, GLN2, AT
3	3	3		AT5G35620.1;AT5G35620.2	AT5G35620.1;AT5G35620.2	AT5G35620.1 | Symbols: LSP1, EIF(ISO)4E, LSP, EIF4E2, eIFiso4E | Eukaryotic initiation factor 4E protein | chr5:13824946-13826331 REVERSE LENGTH=198;AT5G35620.2 | Symbols: LSP1, EIF(ISO)4E, LSP, EIF4E2, eIFiso4E | Eukaryotic initiation factor 4E protein |
3	3	3		AT5G35530.1	AT5G35530.1	AT5G35530.1 | Symbols: | Ribosomal protein S3 family protein | chr5:13710355-13712192 REVERSE LENGTH=248
3	1	3		AT5G35430.1	AT5G35430.1	AT5G35430.1 | Symbols: | Tetratricopeptide repeat (TPR)-like superfamily protein | chr5:13662077-13665735 FORWARD LENGTH=786
3	3	3		AT5G35330.3;AT5G35330.2;AT5G35330.1	AT5G35330.3;AT5G35330.2;AT5G35330.1	AT5G35330.3 | Symbols: MBD02 | methyl-CPG-binding domain protein 02 | chr5:13523725-13525270 REVERSE LENGTH=272;AT5G35330.2 | Symbols: MBD02, MBD2 | methyl-CPG-binding domain protein 02 | chr5:13523725-13525270 REVERSE LENGTH=272;AT5G35330.1 | Symbols: MBD
3	3	3		AT5G35210.2;AT5G35210.1	AT5G35210.2;AT5G35210.1	AT5G35210.2 | Symbols: | metalloendopeptidases;zinc ion binding;DNA binding | chr5:13476213-13482238 REVERSE LENGTH=1539;AT5G35210.1 | Symbols: | metalloendopeptidases;zinc ion binding;DNA binding | chr5:13474499-13482238 REVERSE LENGTH=1706
3	3	3		AT5G35180.2;AT5G35180.1;AT5G35180.4;AT5G35180.3	AT5G35180.2;AT5G35180.1;AT5G35180.4;AT5G35180.3	AT5G35180.2 | Symbols: | Protein of unknown function (DUF1336) | chr5:13424538-13432699 FORWARD LENGTH=778;AT5G35180.1 | Symbols: | Protein of unknown function (DUF1336) | chr5:13424538-13432787 FORWARD LENGTH=778;AT5G35180.4 | Symbols: | Protein of unk
3	3	3		AT5G30510.1	AT5G30510.1	AT5G30510.1 | Symbols: RPS1, ARRPS1 | ribosomal protein S1 | chr5:11619262-11621223 REVERSE LENGTH=416
3	3	3		AT5G30490.2;AT5G30490.1	AT5G30490.2;AT5G30490.1	AT5G30490.2 | Symbols: | FUNCTIONS IN: molecular_function unknown;INVOLVED IN: biological_process unknown;LOCATED IN: cellular_component unknown;EXPRESSED IN: 22 plant structures;EXPRESSED DURING: 13 growth stages;CONTAINS InterPro DOMAIN/s: Craniofa
2	3	3		AT5G28900.1;AT5G28850.2;AT5G28850.1	AT5G28900.1;AT5G28850.2;AT5G28850.1	AT5G28900.1 | Symbols: | Calcium-binding EF-hand family protein | chr5:10925852-10929892 FORWARD LENGTH=536;AT5G28850.2 | Symbols: | Calcium-binding EF-hand family protein | chr5:10877360-10881278 REVERSE LENGTH=536;AT5G28850.1 | Symbols: | Calcium-bind
3	3	3		AT5G28840.2;AT5G28840.1	AT5G28840.2;AT5G28840.1	AT5G28840.2 | Symbols: GME | GDP-D-mannose 3,5-epimerase | chr5:10862472-10864024 REVERSE LENGTH=377;AT5G28840.1 | Symbols: GME | GDP-D-mannose 3,5-epimerase | chr5:10862472-10864024 REVERSE LENGTH=377
0	3	0		AT5G28770.3;AT5G28770.1;AT5G28770.2	AT5G28770.3;AT5G28770.1;AT5G28770.2	AT5G28770.3 | Symbols: BZO2H3 | bZIP transcription factor family protein | chr5:10796907-10798147 REVERSE LENGTH=250;AT5G28770.1 | Symbols: BZO2H3, AtbZIP63 | bZIP transcription factor family protein | chr5:10796648-10798147 REVERSE LENGTH=307;AT5G28770.2
3	3	3		AT5G28740.1	AT5G28740.1	AT5G28740.1 | Symbols: | Tetratricopeptide repeat (TPR)-like superfamily protein | chr5:10780774-10783772 FORWARD LENGTH=917
3	3	3		AT5G28540.1	AT5G28540.1;AT1G09080.2;AT1G09080.1	AT5G28540.1 | Symbols: BIP1 | heat shock protein 70 (Hsp 70) family protein | chr5:10540665-10543274 REVERSE LENGTH=669
3	2	3		AT5G28460.1;AT5G28370.1;AT3G61520.1	AT5G28460.1;AT5G28370.1;AT3G61520.1	AT5G28460.1 | Symbols: | Pentatricopeptide repeat (PPR) superfamily protein | chr5:10374927-10377227 FORWARD LENGTH=766;AT5G28370.1 | Symbols: | Pentatricopeptide repeat (PPR) superfamily protein | chr5:10332375-10334558 REVERSE LENGTH=727;AT3G61520.1 |
0	3	3		AT5G28300.1	AT5G28300.1	AT5G28300.1 | Symbols: | Duplicated homeodomain-like superfamily protein | chr5:10292789-10295101 REVERSE LENGTH=619
3	3	3		AT5G28060.1	AT5G28060.1	AT5G28060.1 | Symbols: | Ribosomal protein S24e family protein | chr5:10069791-10070792 REVERSE LENGTH=133
3	3	3		AT5G28050.1;AT5G28050.2	AT5G28050.1;AT5G28050.2	AT5G28050.1 | Symbols: | Cytidine/deoxycytidylate deaminase family protein | chr5:10044209-10045755 REVERSE LENGTH=185;AT5G28050.2 | Symbols: | Cytidine/deoxycytidylate deaminase family protein | chr5:10044209-10045484 REVERSE LENGTH=204
2	3	3		AT5G28040.1	AT5G28040.1	AT5G28040.1 | Symbols: | DNA-binding storekeeper protein-related transcriptional regulator | chr5:10037654-10038937 REVERSE LENGTH=427
3	3	3		AT5G27850.1	AT5G27850.1	AT5G27850.1 | Symbols: | Ribosomal protein L18e/L15 superfamily protein | chr5:9873169-9874297 FORWARD LENGTH=187
3	3	3		AT5G27700.1	AT5G27700.1	AT5G27700.1 | Symbols: | Ribosomal protein S21e | chr5:9807541-9808048 REVERSE LENGTH=82
3	3	3		AT5G27670.1	AT5G27670.1	AT5G27670.1 | Symbols: HTA7 | histone H2A 7 | chr5:9792807-9793365 REVERSE LENGTH=150
3	3	3		AT5G27650.1	AT5G27650.1	AT5G27650.1 | Symbols: | Tudor/PWWP/MBT superfamily protein | chr5:9785511-9789094 FORWARD LENGTH=1072
3	3	3		AT5G27640.1;AT5G27640.2	AT5G27640.1;AT5G27640.2	AT5G27640.1 | Symbols: TIF3B1, EIF3B, ATEIF3B-1, EIF3B-1, ATTIF3B1 | translation initiation factor 3B1 | chr5:9781207-9784759 REVERSE LENGTH=712;AT5G27640.2 | Symbols: TIF3B1, EIF3B, ATEIF3B-1, EIF3B-1, ATTIF3B1 | translation initiation factor 3B1 | chr5:9
1	3	3		AT5G27620.1	AT5G27620.1	AT5G27620.1 | Symbols: CYCH;1 | cyclin H;1 | chr5:9771762-9774684 FORWARD LENGTH=336
3	3	3		AT5G27540.2;AT5G27540.1	AT5G27540.2;AT5G27540.1	AT5G27540.2 | Symbols: MIRO1 | MIRO-related GTP-ase 1 | chr5:9722816-9727112 FORWARD LENGTH=648;AT5G27540.1 | Symbols: MIRO1, emb2473 | MIRO-related GTP-ase 1 | chr5:9722816-9727112 FORWARD LENGTH=648
3	3	3		AT5G27470.1	AT5G27470.1	AT5G27470.1 | Symbols: | seryl-tRNA synthetase / serine--tRNA ligase | chr5:9695087-9697154 FORWARD LENGTH=451
3	3	3		AT5G27410.1;AT5G27410.2;AT3G05190.1	AT5G27410.1;AT5G27410.2;AT3G05190.1	AT5G27410.1 | Symbols: | D-aminoacid aminotransferase-like PLP-dependent enzymes superfamily protein | chr5:9678821-9682468 FORWARD LENGTH=559;AT5G27410.2 | Symbols: | D-aminoacid aminotransferase-like PLP-dependent enzymes superfamily protein | chr5:967
3	3	3		AT5G27390.1	AT5G27390.1	AT5G27390.1 | Symbols: | Mog1/PsbP/DUF1795-like photosystem II reaction center PsbP family protein | chr5:9674634-9676118 REVERSE LENGTH=241
3	3	3		AT5G27120.1	AT5G27120.1	AT5G27120.1 | Symbols: | NOP56-like pre RNA processing ribonucleoprotein | chr5:9541287-9543684 FORWARD LENGTH=533
3	3	3		AT5G27030.1;AT5G27030.2	AT5G27030.1;AT5G27030.2	AT5G27030.1 | Symbols: TPR3 | TOPLESS-related 3 | chr5:9508913-9515263 REVERSE LENGTH=1108;AT5G27030.2 | Symbols: TPR3 | TOPLESS-related 3 | chr5:9508913-9515263 REVERSE LENGTH=1134
3	3	3		AT5G26860.1	AT5G26860.1;AT3G05780.1;AT3G05790.1	AT5G26860.1 | Symbols: LON_ARA_ARA, LON1 | lon protease 1 | chr5:9451183-9456631 FORWARD LENGTH=940
3	3	3		AT5G26830.1	AT5G26830.1	AT5G26830.1 | Symbols: | Threonyl-tRNA synthetase | chr5:9437351-9441568 FORWARD LENGTH=709
3	3	3		AT5G26780.1;AT5G26780.3;AT5G26780.2	AT5G26780.1;AT5G26780.3;AT5G26780.2	AT5G26780.1 | Symbols: SHM2 | serine hydroxymethyltransferase 2 | chr5:9418299-9421725 FORWARD LENGTH=517;AT5G26780.3 | Symbols: SHM2 | serine hydroxymethyltransferase 2 | chr5:9418299-9421725 FORWARD LENGTH=533;AT5G26780.2 | Symbols: SHM2 | serine hydroxy
2	3	2		AT5G26760.2	AT5G26760.2;AT5G26760.1	AT5G26760.2 | Symbols: | unknown protein;CONTAINS InterPro DOMAIN/s: Protein of unknown function DUF408 (InterPro:IPR007308);Has 35333 Blast hits to 34131 proteins in 2444 species: Archae - 798;Bacteria - 22429;Metazoa - 974;Fungi - 991;Plants - 531
3	3	3		AT5G26742.2;AT5G26742.1;AT5G26742.3	AT5G26742.2;AT5G26742.1;AT5G26742.3	AT5G26742.2 | Symbols: emb1138 | DEAD box RNA helicase (RH3) | chr5:9285540-9288871 REVERSE LENGTH=748;AT5G26742.1 | Symbols: emb1138 | DEAD box RNA helicase (RH3) | chr5:9285540-9288871 REVERSE LENGTH=747;AT5G26742.3 | Symbols: emb1138 | DEAD box RNA heli
3	3	3		AT5G26710.1	AT5G26710.1	AT5G26710.1 | Symbols: | Glutamyl/glutaminyl-tRNA synthetase, class Ic | chr5:9305673-9308247 FORWARD LENGTH=719
0	3	3		AT5G26680.2;AT5G26680.1	AT5G26680.2;AT5G26680.1	AT5G26680.2 | Symbols: | 5-3 exonuclease family protein | chr5:9311882-9315458 REVERSE LENGTH=383;AT5G26680.1 | Symbols: | 5-3 exonuclease family protein | chr5:9311882-9315458 REVERSE LENGTH=453
1	3	1		AT5G26600.2;AT5G26600.1	AT5G26600.2;AT5G26600.1	AT5G26600.2 | Symbols: | Pyridoxal phosphate (PLP)-dependent transferases superfamily protein | chr5:9377455-9378882 FORWARD LENGTH=475;AT5G26600.1 | Symbols: | Pyridoxal phosphate (PLP)-dependent transferases superfamily protein | chr5:9377455-9378882 F
3	3	3		AT5G26570.1;AT5G26570.2	AT5G26570.1;AT5G26570.2	AT5G26570.1 | Symbols: PWD, OK1, ATGWD3 | catalytics;carbohydrate kinases;phosphoglucan, water dikinases | chr5:9261580-9267526 FORWARD LENGTH=1196;AT5G26570.2 | Symbols: PWD, OK1, ATGWD3 | catalytics;carbohydrate kinases;phosphoglucan, water dikinases | c
3	3	3		AT5G26360.1	AT5G26360.1	AT5G26360.1 | Symbols: | TCP-1/cpn60 chaperonin family protein | chr5:9255561-9258891 REVERSE LENGTH=555
3	3	3		AT5G26280.1;AT5G26280.2	AT5G26280.1;AT5G26280.2;AT2G04170.4;AT2G04170.3;AT2G04170.5;AT2G04170.2;AT2G04170.1;AT2G04190.1	AT5G26280.1 | Symbols: | TRAF-like family protein | chr5:9208724-9210403 FORWARD LENGTH=350;AT5G26280.2 | Symbols: | TRAF-like family protein | chr5:9208724-9210403 FORWARD LENGTH=327
3	3	3		AT5G26260.1	AT5G26260.1;AT5G26320.1	AT5G26260.1 | Symbols: | TRAF-like family protein | chr5:9200492-9202153 FORWARD LENGTH=351
3	3	3		AT5G26210.1	AT5G26210.1	AT5G26210.1 | Symbols: AL4 | alfin-like 4 | chr5:9158566-9160221 REVERSE LENGTH=255
3	2	3		AT5G26120.1	AT5G26120.1	AT5G26120.1 | Symbols: ATASD2, ASD2 | alpha-L-arabinofuranosidase 2 | chr5:9121835-9125399 REVERSE LENGTH=674
0	3	1		AT5G25760.2;AT5G25760.1	AT5G25760.2;AT5G25760.1	AT5G25760.2 | Symbols: PEX4 | peroxin4 | chr5:8967983-8969173 FORWARD LENGTH=157;AT5G25760.1 | Symbols: PEX4, UBC21 | peroxin4 | chr5:8967983-8969173 FORWARD LENGTH=157
3	3	3		AT5G25757.1;AT5G25754.1	AT5G25757.1;AT5G25754.1	AT5G25757.1 | Symbols: | RNA polymerase I-associated factor PAF67 | chr5:8965515-8967460 REVERSE LENGTH=514;AT5G25754.1 | Symbols: | RNA polymerase I-associated factor PAF67 | chr5:8953564-8955511 FORWARD LENGTH=514
0	3	3		AT5G25520.2;AT5G25520.1	AT5G25520.2;AT5G25520.1;AT2G25640.1	AT5G25520.2 | Symbols: | SPOC domain / Transcription elongation factor S-II protein | chr5:8885550-8889484 FORWARD LENGTH=997;AT5G25520.1 | Symbols: | SPOC domain / Transcription elongation factor S-II protein | chr5:8885550-8888157 FORWARD LENGTH=735
3	3	3		AT5G25460.1	AT5G25460.1	AT5G25460.1 | Symbols: | Protein of unknown function, DUF642 | chr5:8863430-8865394 FORWARD LENGTH=369
0	3	0		AT5G25270.1	AT5G25270.1	AT5G25270.1 | Symbols: | Ubiquitin-like superfamily protein | chr5:8757577-8762002 REVERSE LENGTH=658
1	3	3		AT5G25150.1	AT5G25150.1	AT5G25150.1 | Symbols: TAF5 | TBP-associated factor 5 | chr5:8677117-8682058 FORWARD LENGTH=669
0	3	0		AT5G25080.1	AT5G25080.1	AT5G25080.1 | Symbols: | Sas10/Utp3/C1D family | chr5:8643782-8646306 FORWARD LENGTH=217
3	3	3		AT5G25060.1	AT5G25060.1;AT5G10800.1	AT5G25060.1 | Symbols: | RNA recognition motif (RRM)-containing protein | chr5:8634219-8639984 REVERSE LENGTH=946
2	3	1		AT5G24840.1	AT5G24840.1	AT5G24840.1 | Symbols: | tRNA (guanine-N-7) methyltransferase | chr5:8533897-8534652 REVERSE LENGTH=251
3	3	3		AT5G24710.1	AT5G24710.1	AT5G24710.1 | Symbols: | Transducin/WD40 repeat-like superfamily protein | chr5:8459148-8467920 REVERSE LENGTH=1377
3	3	3		AT5G24690.1	AT5G24690.1	AT5G24690.1 | Symbols: | Protein of unknown function (DUF3411) | chr5:8455783-8458513 REVERSE LENGTH=521
3	3	3		AT5G24650.1	AT5G24650.1	AT5G24650.1 | Symbols: | Mitochondrial import inner membrane translocase subunit Tim17/Tim22/Tim23 family protein | chr5:8437123-8438859 FORWARD LENGTH=259
1	3	3		AT5G24630.2;AT5G24630.5;AT5G24630.4;AT5G24630.3;AT5G24630.1;AT5G24630.6	AT5G24630.2;AT5G24630.5;AT5G24630.4;AT5G24630.3;AT5G24630.1;AT5G24630.6	AT5G24630.2 | Symbols: BIN4 | double-stranded DNA binding | chr5:8432523-8435682 REVERSE LENGTH=432;AT5G24630.5 | Symbols: BIN4 | double-stranded DNA binding | chr5:8432523-8435682 REVERSE LENGTH=446;AT5G24630.4 | Symbols: BIN4 | double-stranded DNA bindin
3	3	3		AT5G24490.1	AT5G24490.1	AT5G24490.1 | Symbols: | 30S ribosomal protein, putative | chr5:8365690-8367178 FORWARD LENGTH=308
0	3	3		AT5G24460.1	AT5G24460.1	AT5G24460.1 | Symbols: | unknown protein;INVOLVED IN: biological_process unknown;LOCATED IN: cell wall;EXPRESSED IN: 24 plant structures;EXPRESSED DURING: 15 growth stages;Has 1807 Blast hits to 1807 proteins in 277 species: Archae - 0;Bacteria - 0;
0	3	3		AT5G24450.1	AT5G24450.1;AT3G49410.1	AT5G24450.1 | Symbols: | Transcription factor IIIC, subunit 5 | chr5:8348780-8353130 FORWARD LENGTH=554
3	3	3		AT5G24300.2;AT5G24300.1	AT5G24300.2;AT5G24300.1	AT5G24300.2 | Symbols: SSI1 | Glycogen/starch synthases, ADP-glucose type | chr5:8266934-8270860 FORWARD LENGTH=652;AT5G24300.1 | Symbols: SSI1, SSI, ATSS1 | Glycogen/starch synthases, ADP-glucose type | chr5:8266934-8270860 FORWARD LENGTH=652
3	3	3		AT5G23900.1	AT5G23900.1;AT3G48960.1	AT5G23900.1 | Symbols: | Ribosomal protein L13e family protein | chr5:8064176-8065081 REVERSE LENGTH=206
3	3	3		AT5G23860.2;AT5G23860.1	AT5G23860.2;AT5G23860.1	AT5G23860.2 | Symbols: TUB8 | tubulin beta 8 | chr5:8042962-8044528 FORWARD LENGTH=449;AT5G23860.1 | Symbols: TUB8 | tubulin beta 8 | chr5:8042962-8044528 FORWARD LENGTH=449
3	3	3		AT5G23740.1	AT5G23740.1	AT5G23740.1 | Symbols: RPS11-BETA | ribosomal protein S11-beta | chr5:8008251-8009330 REVERSE LENGTH=159
3	3	3		AT5G23540.1;AT5G23540.2	AT5G23540.1;AT5G23540.2	AT5G23540.1 | Symbols: | Mov34/MPN/PAD-1 family protein | chr5:7937772-7939339 FORWARD LENGTH=308;AT5G23540.2 | Symbols: | Mov34/MPN/PAD-1 family protein | chr5:7938109-7939339 FORWARD LENGTH=259
0	3	1		AT5G23510.1;AT5G23510.2	AT5G23510.1;AT5G23510.2;AT5G23490.1	AT5G23510.1 | Symbols: | unknown protein;BEST Arabidopsis thaliana protein match is: unknown protein (TAIR:AT5G23490.1);Has 35333 Blast hits to 34131 proteins in 2444 species: Archae - 798;Bacteria - 22429;Metazoa - 974;Fungi - 991;Plants - 531;Vir
1	3	2		AT5G23150.1	AT5G23150.1	AT5G23150.1 | Symbols: HUA2 | Tudor/PWWP/MBT domain-containing protein | chr5:7786173-7792080 FORWARD LENGTH=1392
3	3	3		AT5G23140.1	AT5G23140.1	AT5G23140.1 | Symbols: CLPP2, NCLPP7 | nuclear-encoded CLP protease P7 | chr5:7783811-7784826 FORWARD LENGTH=241
3	3	3		AT5G23120.1	AT5G23120.1	AT5G23120.1 | Symbols: HCF136 | photosystem II stability/assembly factor, chloroplast (HCF136) | chr5:7778154-7780463 FORWARD LENGTH=403
3	3	3		AT5G23080.1;AT5G23080.2	AT5G23080.1;AT5G23080.2	AT5G23080.1 | Symbols: TGH | SWAP (Suppressor-of-White-APricot)/surp domain-containing protein | chr5:7743226-7748889 REVERSE LENGTH=930;AT5G23080.2 | Symbols: TGH | SWAP (Suppressor-of-White-APricot)/surp domain-containing protein | chr5:7743226-7748889 R
3	3	3		AT5G23060.1	AT5G23060.1	AT5G23060.1 | Symbols: CaS | calcium sensing receptor | chr5:7736760-7738412 REVERSE LENGTH=387
3	3	3		AT5G22880.1	AT5G22880.1	AT5G22880.1 | Symbols: H2B, HTB2 | histone B2 | chr5:7652130-7652567 REVERSE LENGTH=145
3	3	3		AT5G22800.1	AT5G22800.1	AT5G22800.1 | Symbols: EMB86, EMB1030, EMB263 | Alanyl-tRNA synthetase, class IIc | chr5:7616221-7619961 REVERSE LENGTH=978
3	3	3		AT5G22780.1;AT5G22770.3;AT5G22770.2;AT5G22770.1	AT5G22780.1;AT5G22770.3;AT5G22770.2;AT5G22770.1	AT5G22780.1 | Symbols: | Adaptor protein complex AP-2, alpha subunit | chr5:7590100-7597828 REVERSE LENGTH=1013;AT5G22770.3 | Symbols: alpha-ADR | alpha-adaptin | chr5:7579844-7588026 REVERSE LENGTH=1012;AT5G22770.2 | Symbols: alpha-ADR | alpha-adaptin |
3	3	3		AT5G22650.1;AT5G22650.2	AT5G22650.1;AT5G22650.2	AT5G22650.1 | Symbols: HD2B, HDT02, HDT2, ATHD2B, HDA4, HD2, ATHD2 | histone deacetylase 2B | chr5:7534120-7536054 FORWARD LENGTH=306;AT5G22650.2 | Symbols: HD2B, HDT02, HDT2, ATHD2B, HDA4, HD2 | histone deacetylase 2B | chr5:7534120-7536054 FORWARD LENGTH
3	3	3		AT5G22470.1	AT5G22470.1	AT5G22470.1 | Symbols: | NAD+ ADP-ribosyltransferases;NAD+ ADP-ribosyltransferases | chr5:7447045-7450743 FORWARD LENGTH=814
1	3	0		AT5G22450.1	AT5G22450.1	AT5G22450.1 | Symbols: | unknown protein;LOCATED IN: chloroplast;EXPRESSED IN: 22 plant structures;EXPRESSED DURING: 13 growth stages;BEST Arabidopsis thaliana protein match is: unknown protein (TAIR:AT2G19390.1);Has 30201 Blast hits to 17322 protein
3	3	3		AT5G22330.1	AT5G22330.1	AT5G22330.1 | Symbols: ATTIP49A, RIN1 | P-loop containing nucleoside triphosphate hydrolases superfamily protein | chr5:7391026-7394071 REVERSE LENGTH=458
0	3	0		AT5G22320.2;AT5G22320.1	AT5G22320.2;AT5G22320.1	AT5G22320.2 | Symbols: | Leucine-rich repeat (LRR) family protein | chr5:7388175-7390426 REVERSE LENGTH=436;AT5G22320.1 | Symbols: | Leucine-rich repeat (LRR) family protein | chr5:7388175-7390426 REVERSE LENGTH=452
0	3	2		AT5G22220.3;AT5G22220.2	AT5G22220.3;AT5G22220.2;AT1G47870.2;AT1G47870.1	AT5G22220.3 | Symbols: E2F1, E2FB, ATE2FB | E2F transcription factor 1 | chr5:7360749-7364120 FORWARD LENGTH=466;AT5G22220.2 | Symbols: E2F1, E2FB, ATE2FB | E2F transcription factor 1 | chr5:7360749-7364120 FORWARD LENGTH=469
1	3	3		AT5G22120.1	AT5G22120.1	AT5G22120.1 | Symbols: | unknown protein;FUNCTIONS IN: molecular_function unknown;INVOLVED IN: biological_process unknown;LOCATED IN: cellular_component unknown;EXPRESSED IN: cultured cell;Has 30201 Blast hits to 17322 proteins in 780 species: Archae
1	3	3		AT5G22080.1;AT5G22080.2	AT5G22080.1;AT5G22080.2	AT5G22080.1 | Symbols: | Chaperone DnaJ-domain superfamily protein | chr5:7310600-7313540 REVERSE LENGTH=246;AT5G22080.2 | Symbols: | Chaperone DnaJ-domain superfamily protein | chr5:7310600-7313540 REVERSE LENGTH=228
3	3	3		AT5G22040.3;AT5G22040.2;AT5G22040.1	AT5G22040.3;AT5G22040.2;AT5G22040.1	AT5G22040.3 | Symbols: | unknown protein;FUNCTIONS IN: molecular_function unknown;INVOLVED IN: biological_process unknown;LOCATED IN: cellular_component unknown. | chr5:7297154-7298363 REVERSE LENGTH=284;AT5G22040.2 | Symbols: | unknown protein;FUNCT
2	3	3		AT5G22030.2;AT5G22030.1	AT5G22030.2;AT5G22030.1	AT5G22030.2 | Symbols: UBP8 | ubiquitin-specific protease 8 | chr5:7290155-7296344 REVERSE LENGTH=913;AT5G22030.1 | Symbols: UBP8 | ubiquitin-specific protease 8 | chr5:7290155-7296344 REVERSE LENGTH=913
3	3	3		AT5G22010.1	AT5G22010.1	AT5G22010.1 | Symbols: AtRFC1, RFC1 | replication factor C1 | chr5:7280632-7287037 REVERSE LENGTH=956
1	3	3		AT5G21990.1	AT5G21990.1	AT5G21990.1 | Symbols: TPR7 | Tetratricopeptide repeat (TPR)-like superfamily protein | chr5:7273395-7276318 FORWARD LENGTH=554
3	3	3		AT5G21326.1	AT5G21326.1;AT5G21222.1;AT2G26980.2;AT2G26980.1;AT2G26980.5;AT2G26980.3;AT2G26980.4;AT1G30270.1	AT5G21326.1 | Symbols: | Ca2+regulated serine-threonine protein kinase family protein | chr5:7218081-7221743 FORWARD LENGTH=439
3	3	3		AT5G21274.1;AT3G56800.1;AT3G43810.1;AT2G41110.1;AT2G27030.1;AT2G27030.3;AT2G41110.2;AT2G27030.2	AT5G21274.1;AT3G56800.1;AT3G43810.1;AT2G41110.1;AT2G27030.1;AT2G27030.3;AT2G41110.2;AT2G27030.2	AT5G21274.1 | Symbols: CAM6, ACAM-6 | calmodulin 6 | chr5:7214740-7215950 REVERSE LENGTH=149;AT3G56800.1 | Symbols: CAM3, acam-3 | calmodulin 3 | chr3:21034981-21035920 REVERSE LENGTH=149;AT3G43810.1 | Symbols: CAM7 | calmodulin 7 | chr3:15664619-15666355
3	3	3		AT5G21160.1;AT5G21160.2;AT5G21160.3	AT5G21160.1;AT5G21160.2;AT5G21160.3	AT5G21160.1 | Symbols: | LA RNA-binding protein | chr5:7199191-7203879 REVERSE LENGTH=826;AT5G21160.2 | Symbols: | LA RNA-binding protein | chr5:7198817-7203879 REVERSE LENGTH=832;AT5G21160.3 | Symbols: | LA RNA-binding protein | chr5:7198817-7203879 RE
3	3	3		AT5G20950.2;AT5G20950.1	AT5G20950.2;AT5G20950.1;AT3G47050.2;AT3G47000.1;AT3G47050.1	AT5G20950.2 | Symbols: | Glycosyl hydrolase family protein | chr5:7107609-7110775 REVERSE LENGTH=624;AT5G20950.1 | Symbols: | Glycosyl hydrolase family protein | chr5:7107609-7110775 REVERSE LENGTH=624
3	3	3		AT5G20930.1	AT5G20930.1	AT5G20930.1 | Symbols: TSL | Protein kinase superfamily protein | chr5:7098213-7102970 FORWARD LENGTH=688
3	3	3		AT5G20920.3;AT5G20920.1;AT5G20920.2	AT5G20920.3;AT5G20920.1;AT5G20920.2	AT5G20920.3 | Symbols: EIF2 BETA | eukaryotic translation initiation factor 2 beta subunit | chr5:7094994-7096661 REVERSE LENGTH=268;AT5G20920.1 | Symbols: EIF2 BETA, EMB1401 | eukaryotic translation initiation factor 2 beta subunit | chr5:7094994-7096661
3	3	3		AT5G20890.1	AT5G20890.1	AT5G20890.1 | Symbols: | TCP-1/cpn60 chaperonin family protein | chr5:7087020-7089906 REVERSE LENGTH=527
3	3	3		AT5G20630.1	AT5G20630.1	AT5G20630.1 | Symbols: GLP3, GLP3A, GLP3B, ATGER3, GER3 | germin 3 | chr5:6975315-6975950 REVERSE LENGTH=211
3	3	3		AT5G20600.1	AT5G20600.1	AT5G20600.1 | Symbols: | FUNCTIONS IN: molecular_function unknown;INVOLVED IN: rRNA processing;LOCATED IN: preribosome, small subunit precursor;EXPRESSED IN: 22 plant structures;EXPRESSED DURING: 13 growth stages;CONTAINS InterPro DOMAIN/s: Nucleolar
1	3	3		AT5G20570.1;AT5G20570.3;AT5G20570.2	AT5G20570.1;AT5G20570.3;AT5G20570.2	AT5G20570.1 | Symbols: ROC1, RBX1, HRT1, ATRBX1 | RING-box 1 | chr5:6956905-6958221 REVERSE LENGTH=118;AT5G20570.3 | Symbols: ROC1, RBX1, HRT1, ATRBX1 | RING-box 1 | chr5:6956905-6958221 REVERSE LENGTH=136;AT5G20570.2 | Symbols: ROC1, RBX1, HRT1, ATRBX1 |
3	3	3		AT5G20490.1;AT5G20490.2	AT5G20490.1;AT5G20490.2;AT5G20470.1	AT5G20490.1 | Symbols: XIK, ATXIK, XI-17 | Myosin family protein with Dil domain | chr5:6927064-6936825 REVERSE LENGTH=1545;AT5G20490.2 | Symbols: XIK, ATXIK, XI-17 | Myosin family protein with Dil domain | chr5:6927064-6936079 REVERSE LENGTH=1465
0	3	2		AT5G20360.1	AT5G20360.1	AT5G20360.1 | Symbols: Phox3 | Octicosapeptide/Phox/Bem1p (PB1) domain-containing protein / tetratricopeptide repeat (TPR)-containing protein | chr5:6882121-6884630 REVERSE LENGTH=809
3	3	3		AT5G20290.1	AT5G20290.1;AT5G59240.1	AT5G20290.1 | Symbols: | Ribosomal protein S8e family protein | chr5:6851695-6853012 REVERSE LENGTH=222
3	3	3		AT5G20280.1	AT5G20280.1;AT5G11110.1;AT1G04920.1	AT5G20280.1 | Symbols: ATSPS1F, SPS1F | sucrose phosphate synthase 1F | chr5:6844994-6849997 REVERSE LENGTH=1043
3	3	3		AT5G20250.4;AT5G20250.3;AT5G20250.2;AT5G20250.1	AT5G20250.4;AT5G20250.3;AT5G20250.2;AT5G20250.1	AT5G20250.4 | Symbols: DIN10 | Raffinose synthase family protein | chr5:6833730-6836635 FORWARD LENGTH=844;AT5G20250.3 | Symbols: DIN10 | Raffinose synthase family protein | chr5:6834207-6836635 FORWARD LENGTH=749;AT5G20250.2 | Symbols: DIN10 | Raffinose s
2	3	3		AT5G20200.1	AT5G20200.1	AT5G20200.1 | Symbols: | nucleoporin-related | chr5:6816776-6821620 FORWARD LENGTH=762
3	3	3		AT5G20160.1;AT5G20160.2;AT5G20160.3;AT4G22380.1	AT5G20160.1;AT5G20160.2;AT5G20160.3;AT4G22380.1	AT5G20160.1 | Symbols: | Ribosomal protein L7Ae/L30e/S12e/Gadd45 family protein | chr5:6804075-6805102 REVERSE LENGTH=128;AT5G20160.2 | Symbols: | Ribosomal protein L7Ae/L30e/S12e/Gadd45 family protein | chr5:6804075-6805102 REVERSE LENGTH=160;AT5G20160.
3	3	3		AT5G20010.1;AT5G55190.1;AT5G20020.1	AT5G20010.1;AT5G55190.1;AT5G20020.1	AT5G20010.1 | Symbols: RAN-1, RAN1, ATRAN1 | RAS-related nuclear protein-1 | chr5:6760364-6761747 FORWARD LENGTH=221;AT5G55190.1 | Symbols: RAN3, ATRAN3 | RAN GTPase 3 | chr5:22392285-22393957 FORWARD LENGTH=221;AT5G20020.1 | Symbols: RAN2 | RAS-related GT
3	3	3		AT5G19990.1;AT5G20000.1	AT5G19990.1;AT5G20000.1	AT5G19990.1 | Symbols: RPT6A, ATSUG1 | regulatory particle triple-A ATPase 6A | chr5:6752144-6754918 FORWARD LENGTH=419;AT5G20000.1 | Symbols: | AAA-type ATPase family protein | chr5:6756915-6759550 FORWARD LENGTH=419
3	3	3		AT5G19940.2;AT5G19940.1	AT5G19940.2;AT5G19940.1	AT5G19940.2 | Symbols: | Plastid-lipid associated protein PAP / fibrillin family protein | chr5:6739693-6740747 FORWARD LENGTH=235;AT5G19940.1 | Symbols: | Plastid-lipid associated protein PAP / fibrillin family protein | chr5:6739693-6740661 FORWARD LEN
2	3	2		AT5G19920.1	AT5G19920.1	AT5G19920.1 | Symbols: | Transducin/WD40 repeat-like superfamily protein | chr5:6733622-6737266 REVERSE LENGTH=656
3	3	3		AT5G19820.1	AT5G19820.1	AT5G19820.1 | Symbols: emb2734 | ARM repeat superfamily protein | chr5:6695731-6701247 REVERSE LENGTH=1116
3	3	3		AT5G19780.1;AT5G19770.1	AT5G19780.1;AT5G19770.1	AT5G19780.1 | Symbols: TUA5 | tubulin alpha-5 | chr5:6687212-6688926 FORWARD LENGTH=450;AT5G19770.1 | Symbols: TUA3 | tubulin alpha-3 | chr5:6682761-6684474 REVERSE LENGTH=450
3	3	3		AT5G19760.1	AT5G19760.1	AT5G19760.1 | Symbols: | Mitochondrial substrate carrier family protein | chr5:6679591-6681845 REVERSE LENGTH=298
3	3	3		AT5G19690.1	AT5G19690.1	AT5G19690.1 | Symbols: STT3A | staurosporin and temperature sensitive 3-like A | chr5:6652649-6658214 FORWARD LENGTH=779
3	3	3		AT5G19620.1	AT5G19620.1	AT5G19620.1 | Symbols: EMB213, OEP80, ATOEP80, TOC75 | outer envelope protein of 80 kDa | chr5:6623323-6627641 FORWARD LENGTH=732
3	3	3		AT5G19550.1	AT5G19550.1;AT1G62800.1;AT1G62800.2	AT5G19550.1 | Symbols: ASP2, AAT2 | aspartate aminotransferase 2 | chr5:6598201-6601597 FORWARD LENGTH=405
3	3	3		AT5G19510.1	AT5G19510.1	AT5G19510.1 | Symbols: | Translation elongation factor EF1B/ribosomal protein S6 family protein | chr5:6581854-6583137 REVERSE LENGTH=224
3	3	3		AT5G19485.1	AT5G19485.1	AT5G19485.1 | Symbols: | transferases;nucleotidyltransferases | chr5:6573907-6576352 REVERSE LENGTH=456
3	3	3		AT5G19370.1	AT5G19370.1	AT5G19370.1 | Symbols: | rhodanese-like domain-containing protein / PPIC-type PPIASE domain-containing protein | chr5:6524247-6526629 REVERSE LENGTH=299
2	3	3		AT5G19350.2;AT5G19350.1	AT5G19350.2;AT5G19350.1	AT5G19350.2 | Symbols: | RNA-binding (RRM/RBD/RNP motifs) family protein | chr5:6518978-6521295 FORWARD LENGTH=421;AT5G19350.1 | Symbols: | RNA-binding (RRM/RBD/RNP motifs) family protein | chr5:6518978-6521295 FORWARD LENGTH=425
3	3	3		AT5G19300.1	AT5G19300.1	AT5G19300.1 | Symbols: | CONTAINS InterPro DOMAIN/s: Nucleic acid-binding, OB-fold-like (InterPro:IPR016027), Protein of unknown function DUF171 (InterPro:IPR003750);Has 3649 Blast hits to 1964 proteins in 291 species: Archae - 113;Bacteria - 121;Metaz
3	3	3		AT5G19220.1	AT5G19220.1;AT1G27680.1;AT4G39210.1;AT2G21590.2;AT2G21590.1	AT5G19220.1 | Symbols: ADG2, APL1 | ADP glucose pyrophosphorylase large subunit 1 | chr5:6463931-6466775 REVERSE LENGTH=522
1	3	0		AT5G19050.1	AT5G19050.1	AT5G19050.1 | Symbols: | alpha/beta-Hydrolases superfamily protein | chr5:6369307-6371726 FORWARD LENGTH=361
3	3	3		AT5G18960.1	AT5G18960.1	AT5G18960.1 | Symbols: FRS12 | FAR1-related sequence 12 | chr5:6330556-6333071 FORWARD LENGTH=788
1	3	2		AT5G18650.1	AT5G18650.1	AT5G18650.1 | Symbols: | CHY-type/CTCHY-type/RING-type Zinc finger protein | chr5:6218260-6220374 FORWARD LENGTH=267
3	3	3		AT5G18620.1;AT5G18620.2	AT5G18620.1;AT5G18620.2	AT5G18620.1 | Symbols: CHR17 | chromatin remodeling factor17 | chr5:6196190-6202058 REVERSE LENGTH=1069;AT5G18620.2 | Symbols: CHR17 | chromatin remodeling factor17 | chr5:6196190-6202058 REVERSE LENGTH=1072
3	3	3		AT5G18400.3;AT5G18400.2;AT5G18400.1	AT5G18400.3;AT5G18400.2;AT5G18400.1;AT5G18362.1	AT5G18400.3 | Symbols: | Cytokine-induced anti-apoptosis inhibitor 1, Fe-S biogenesis | chr5:6092955-6094876 REVERSE LENGTH=272;AT5G18400.2 | Symbols: | Cytokine-induced anti-apoptosis inhibitor 1, Fe-S biogenesis | chr5:6092955-6094876 REVERSE LENGTH=27
3	3	3		AT5G18380.2;AT5G18380.1;AT5G18380.3	AT5G18380.2;AT5G18380.1;AT5G18380.3;AT3G04230.1	AT5G18380.2 | Symbols: | Ribosomal protein S5 domain 2-like superfamily protein | chr5:6090128-6090693 REVERSE LENGTH=144;AT5G18380.1 | Symbols: | Ribosomal protein S5 domain 2-like superfamily protein | chr5:6090253-6090693 REVERSE LENGTH=146;AT5G18380.
0	3	0		AT5G18240.4;AT5G18240.1;AT5G18240.3;AT5G18240.2;AT5G18240.5	AT5G18240.4;AT5G18240.1;AT5G18240.3;AT5G18240.2;AT5G18240.5;AT2G01060.2	AT5G18240.4 | Symbols: MYR1 | myb-related protein 1 | chr5:6028617-6030573 REVERSE LENGTH=402;AT5G18240.1 | Symbols: MYR1, ATMYR1 | myb-related protein 1 | chr5:6028617-6030573 REVERSE LENGTH=402;AT5G18240.3 | Symbols: MYR1 | myb-related protein 1 | chr5:6
3	3	2		AT5G18230.1;AT5G18230.2	AT5G18230.1;AT5G18230.2	AT5G18230.1 | Symbols: | transcription regulator NOT2/NOT3/NOT5 family protein | chr5:6021610-6027031 REVERSE LENGTH=843;AT5G18230.2 | Symbols: | transcription regulator NOT2/NOT3/NOT5 family protein | chr5:6021610-6027031 REVERSE LENGTH=845
3	3	3		AT5G18110.1	AT5G18110.1	AT5G18110.1 | Symbols: NCBP | novel cap-binding protein | chr5:5989105-5990588 REVERSE LENGTH=221
3	3	3		AT5G17920.2;AT5G17920.1	AT5G17920.2;AT5G17920.1;AT5G20980.2;AT5G20980.1;AT2G43800.1	AT5G17920.2 | Symbols: ATCIMS | Cobalamin-independent synthase family protein | chr5:5935771-5939195 FORWARD LENGTH=765;AT5G17920.1 | Symbols: ATCIMS, ATMETS, ATMS1 | Cobalamin-independent synthase family protein | chr5:5935771-5939195 FORWARD LENGTH=765
1	3	3		AT5G17900.1	AT5G17900.1	AT5G17900.1 | Symbols: | microfibrillar-associated protein-related | chr5:5925144-5926690 FORWARD LENGTH=435
3	3	3		AT5G17870.1	AT5G17870.1	AT5G17870.1 | Symbols: PSRP6 | plastid-specific 50S ribosomal protein 6 | chr5:5907817-5908137 FORWARD LENGTH=106
3	3	3		AT5G17820.1	AT5G17820.1	AT5G17820.1 | Symbols: | Peroxidase superfamily protein | chr5:5888195-5890101 REVERSE LENGTH=313
3	3	3		AT5G17770.1	AT5G17770.1	AT5G17770.1 | Symbols: ATCBR, CBR1, CBR | NADH:cytochrome B5 reductase 1 | chr5:5864543-5866495 REVERSE LENGTH=281
0	3	1		AT5G17690.1	AT5G17690.1	AT5G17690.1 | Symbols: TFL2, LHP1 | like heterochromatin protein (LHP1) | chr5:5827504-5829537 REVERSE LENGTH=445
3	3	3		AT5G17380.1	AT5G17380.1	AT5G17380.1 | Symbols: | Thiamine pyrophosphate dependent pyruvate decarboxylase family protein | chr5:5724920-5726720 REVERSE LENGTH=572
3	3	3		AT5G17330.1	AT5G17330.1;AT2G02010.1;AT2G02000.1	AT5G17330.1 | Symbols: GAD, GAD1 | glutamate decarboxylase | chr5:5711141-5714839 FORWARD LENGTH=502
3	3	3		AT5G17310.2;AT5G17310.1	AT5G17310.2;AT5G17310.1	AT5G17310.2 | Symbols: UGP2 | UDP-glucose pyrophosphorylase 2 | chr5:5696955-5700845 REVERSE LENGTH=470;AT5G17310.1 | Symbols: UGP2, AtUGP2 | UDP-glucose pyrophosphorylase 2 | chr5:5696955-5699671 REVERSE LENGTH=390
3	3	3		AT5G17170.1;AT5G17170.2	AT5G17170.1;AT5G17170.2	AT5G17170.1 | Symbols: ENH1 | rubredoxin family protein | chr5:5649335-5650975 FORWARD LENGTH=271;AT5G17170.2 | Symbols: ENH1 | rubredoxin family protein | chr5:5649335-5650835 FORWARD LENGTH=224
3	3	3		AT5G17050.1	AT5G17050.1;AT5G17040.1	AT5G17050.1 | Symbols: UGT78D2 | UDP-glucosyl transferase 78D2 | chr5:5607828-5609392 REVERSE LENGTH=460
3	3	3		AT5G17020.2;AT5G17020.1	AT5G17020.2;AT5G17020.1	AT5G17020.2 | Symbols: XPO1A | exportin 1A | chr5:5594904-5602467 FORWARD LENGTH=1060;AT5G17020.1 | Symbols: XPO1A, ATCRM1, ATXPO1, XPO1, HIT2 | exportin 1A | chr5:5594904-5602467 FORWARD LENGTH=1075
3	3	3		AT5G16970.1	AT5G16970.1;AT5G16990.1;AT5G16980.1;AT5G16980.2	AT5G16970.1 | Symbols: AT-AER, AER | alkenal reductase | chr5:5576291-5578001 REVERSE LENGTH=345
0	3	3		AT5G16880.2;AT5G16880.1;AT5G16880.3	AT5G16880.2;AT5G16880.1;AT5G16880.3	AT5G16880.2 | Symbols: | Target of Myb protein 1 | chr5:5549658-5551274 FORWARD LENGTH=407;AT5G16880.1 | Symbols: | Target of Myb protein 1 | chr5:5549658-5551274 FORWARD LENGTH=407;AT5G16880.3 | Symbols: | Target of Myb protein 1 | chr5:5549658-5551021
3	3	3		AT5G16840.3;AT5G16840.1;AT5G16840.2	AT5G16840.3;AT5G16840.1;AT5G16840.2	AT5G16840.3 | Symbols: BPA1 | binding partner of acd11 1 | chr5:5536042-5538026 FORWARD LENGTH=257;AT5G16840.1 | Symbols: BPA1 | binding partner of acd11 1 | chr5:5536042-5538026 FORWARD LENGTH=259;AT5G16840.2 | Symbols: BPA1 | binding partner of acd11 1 |
3	3	3		AT5G16780.1	AT5G16780.1	AT5G16780.1 | Symbols: DOT2, MDF | SART-1 family | chr5:5517784-5521566 REVERSE LENGTH=820
1	3	3		AT5G16760.1	AT5G16760.1	AT5G16760.1 | Symbols: | Inositol 1,3,4-trisphosphate 5/6-kinase family protein | chr5:5509890-5510849 FORWARD LENGTH=319
3	3	3		AT5G16750.1	AT5G16750.1	AT5G16750.1 | Symbols: TOZ | Transducin family protein / WD-40 repeat family protein | chr5:5504541-5509266 REVERSE LENGTH=876
0	3	3		AT5G16730.1	AT5G16730.1	AT5G16730.1 | Symbols: | Plant protein of unknown function (DUF827) | chr5:5497890-5500775 FORWARD LENGTH=853
3	3	3		AT5G16680.1	AT5G16680.1	AT5G16680.1 | Symbols: | RING/FYVE/PHD zinc finger superfamily protein | chr5:5467534-5472956 REVERSE LENGTH=1311
0	3	3		AT5G16310.1	AT5G16310.1	AT5G16310.1 | Symbols: UCH1 | Peptidase C12, ubiquitin carboxyl-terminal hydrolase 1 | chr5:5342579-5344153 REVERSE LENGTH=334
3	3	3		AT5G16280.1;AT5G16280.2	AT5G16280.1;AT5G16280.2	AT5G16280.1 | Symbols: | Tetratricopeptide repeat (TPR)-like superfamily protein | chr5:5323377-5331345 REVERSE LENGTH=1272;AT5G16280.2 | Symbols: | Tetratricopeptide repeat (TPR)-like superfamily protein | chr5:5323377-5331345 REVERSE LENGTH=1244
1	3	3		AT5G16270.1	AT5G16270.1	AT5G16270.1 | Symbols: ATRAD21.3, SYN4 | sister chromatid cohesion 1 protein 4 | chr5:5316783-5322330 FORWARD LENGTH=1031
0	3	3		AT5G16260.1	AT5G16260.1	AT5G16260.1 | Symbols: ELF9 | RNA binding (RRM/RBD/RNP motifs) family protein | chr5:5311363-5315496 FORWARD LENGTH=519
3	3	3		AT5G16130.1	AT5G16130.1	AT5G16130.1 | Symbols: | Ribosomal protein S7e family protein | chr5:5268984-5269912 FORWARD LENGTH=190
3	3	3		AT5G16070.1	AT5G16070.1	AT5G16070.1 | Symbols: | TCP-1/cpn60 chaperonin family protein | chr5:5247549-5251050 REVERSE LENGTH=535
1	3	3		AT5G15970.1	AT5G15970.1	AT5G15970.1 | Symbols: KIN2, COR6.6 | stress-responsive protein (KIN2) / stress-induced protein (KIN2) / cold-responsive protein (COR6.6) / cold-regulated protein (COR6.6) | chr5:5211966-5212441 FORWARD LENGTH=66
1	3	2		AT5G15960.1	AT5G15960.1	AT5G15960.1 | Symbols: KIN1 | stress-responsive protein (KIN1) / stress-induced protein (KIN1) | chr5:5209992-5210473 FORWARD LENGTH=66
3	2	3		AT5G15910.1	AT5G15910.1	AT5G15910.1 | Symbols: | NAD(P)-binding Rossmann-fold superfamily protein | chr5:5193207-5195202 FORWARD LENGTH=269
3	3	3		AT5G15810.1	AT5G15810.1	AT5G15810.1 | Symbols: | N2,N2-dimethylguanosine tRNA methyltransferase | chr5:5157798-5161121 FORWARD LENGTH=691
3	3	3		AT5G15650.1	AT5G15650.1	AT5G15650.1 | Symbols: RGP2, ATRGP2 | reversibly glycosylated polypeptide 2 | chr5:5092203-5094093 FORWARD LENGTH=360
0	3	3		AT5G15570.1	AT5G15570.1	AT5G15570.1 | Symbols: | Bromodomain transcription factor | chr5:5066851-5067996 FORWARD LENGTH=381
3	3	3		AT5G15230.2;AT5G15230.1	AT5G15230.2;AT5G15230.1	AT5G15230.2 | Symbols: GASA4 | GAST1 protein homolog 4 | chr5:4945286-4946025 FORWARD LENGTH=83;AT5G15230.1 | Symbols: GASA4 | GAST1 protein homolog 4 | chr5:4945017-4946025 FORWARD LENGTH=106
3	3	3		AT5G15210.1	AT5G15210.1	AT5G15210.1 | Symbols: ATHB30, ZFHD3, HB30, ZHD8 | homeobox protein 30 | chr5:4937874-4938689 REVERSE LENGTH=271
3	3	3		AT5G15200.1;AT5G15200.2	AT5G15200.1;AT5G15200.2	AT5G15200.1 | Symbols: | Ribosomal protein S4 | chr5:4935124-4936334 REVERSE LENGTH=198;AT5G15200.2 | Symbols: | Ribosomal protein S4 | chr5:4935602-4936334 REVERSE LENGTH=156
3	3	3		AT5G15090.2;AT5G15090.1	AT5G15090.2;AT5G15090.1	AT5G15090.2 | Symbols: VDAC3 | voltage dependent anion channel 3 | chr5:4889641-4891389 REVERSE LENGTH=274;AT5G15090.1 | Symbols: VDAC3, ATVDAC3 | voltage dependent anion channel 3 | chr5:4889641-4891389 REVERSE LENGTH=274
3	3	3		AT5G15020.2;AT5G15020.1	AT5G15020.2;AT5G15020.1	AT5G15020.2 | Symbols: SNL2 | SIN3-like 2 | chr5:4859408-4865569 REVERSE LENGTH=1355;AT5G15020.1 | Symbols: SNL2 | SIN3-like 2 | chr5:4859408-4865569 REVERSE LENGTH=1367
0	3	2		AT5G14790.1	AT5G14790.1;AT3G01450.1	AT5G14790.1 | Symbols: | ARM repeat superfamily protein | chr5:4784058-4785508 FORWARD LENGTH=346
3	3	3		AT5G14780.1	AT5G14780.1	AT5G14780.1 | Symbols: FDH | formate dehydrogenase | chr5:4777043-4779190 FORWARD LENGTH=384
3	3	3		AT5G14740.2;AT5G14740.1;AT5G14740.5;AT5G14740.4;AT5G14740.3	AT5G14740.2;AT5G14740.1;AT5G14740.5;AT5G14740.4;AT5G14740.3	AT5G14740.2 | Symbols: CA2, CA18, BETA CA2 | carbonic anhydrase 2 | chr5:4760536-4762382 FORWARD LENGTH=259;AT5G14740.1 | Symbols: CA2, CA18, BETA CA2 | carbonic anhydrase 2 | chr5:4758257-4762382 FORWARD LENGTH=331;AT5G14740.5 | Symbols: CA2, CA18, BETA C
2	3	3		AT5G14720.1	AT5G14720.1;AT1G79640.2;AT1G79640.1	AT5G14720.1 | Symbols: | Protein kinase superfamily protein | chr5:4748212-4752642 REVERSE LENGTH=674
3	3	3		AT5G14680.1	AT5G14680.1	AT5G14680.1 | Symbols: | Adenine nucleotide alpha hydrolases-like superfamily protein | chr5:4731620-4733025 REVERSE LENGTH=175
3	3	3		AT5G14610.2;AT5G14610.1	AT5G14610.2;AT5G14610.1	AT5G14610.2 | Symbols: | DEAD box RNA helicase family protein | chr5:4711271-4714713 FORWARD LENGTH=645;AT5G14610.1 | Symbols: | DEAD box RNA helicase family protein | chr5:4711271-4714713 FORWARD LENGTH=712
0	3	3		AT5G14600.1	AT5G14600.1	AT5G14600.1 | Symbols: | S-adenosyl-L-methionine-dependent methyltransferases superfamily protein | chr5:4707518-4709022 FORWARD LENGTH=318
3	3	3		AT5G14590.1	AT5G14590.1	AT5G14590.1 | Symbols: | Isocitrate/isopropylmalate dehydrogenase family protein | chr5:4703533-4706627 REVERSE LENGTH=485
3	2	3		AT5G14580.1	AT5G14580.1	AT5G14580.1 | Symbols: | polyribonucleotide nucleotidyltransferase, putative | chr5:4697612-4703013 REVERSE LENGTH=991
3	3	3		AT5G14540.1	AT5G14540.1	AT5G14540.1 | Symbols: | Protein of unknown function (DUF1421) | chr5:4687333-4689624 REVERSE LENGTH=547
0	3	2		AT5G14530.1	AT5G14530.1	AT5G14530.1 | Symbols: | Transducin/WD40 repeat-like superfamily protein | chr5:4684782-4686865 REVERSE LENGTH=330
3	3	3		AT5G14520.1	AT5G14520.1	AT5G14520.1 | Symbols: | pescadillo-related | chr5:4680789-4684330 REVERSE LENGTH=590
1	3	2		AT5G14450.1	AT5G14450.1	AT5G14450.1 | Symbols: | GDSL-like Lipase/Acylhydrolase superfamily protein | chr5:4658488-4660034 FORWARD LENGTH=389
3	3	3		AT5G14320.1;AT5G14320.2	AT5G14320.1;AT5G14320.2	AT5G14320.1 | Symbols: | Ribosomal protein S13/S18 family | chr5:4617839-4618772 REVERSE LENGTH=169;AT5G14320.2 | Symbols: | Ribosomal protein S13/S18 family | chr5:4618189-4618772 REVERSE LENGTH=128
0	3	2		AT5G14270.1;AT5G14270.2	AT5G14270.1;AT5G14270.2	AT5G14270.1 | Symbols: ATBET9, BET9 | bromodomain and extraterminal domain protein 9 | chr5:4605173-4608517 FORWARD LENGTH=688;AT5G14270.2 | Symbols: BET9 | bromodomain and extraterminal domain protein 9 | chr5:4605173-4608517 FORWARD LENGTH=689
3	3	3		AT5G14250.1;AT5G14250.2	AT5G14250.1;AT5G14250.2	AT5G14250.1 | Symbols: COP13, CSN3, FUS11 | Proteasome component (PCI) domain protein | chr5:4597970-4600561 FORWARD LENGTH=429;AT5G14250.2 | Symbols: COP13, CSN3, FUS11 | Proteasome component (PCI) domain protein | chr5:4597970-4599986 FORWARD LENGTH=356
0	3	2		AT5G14240.1	AT5G14240.1	AT5G14240.1 | Symbols: | Thioredoxin superfamily protein | chr5:4596223-4597568 REVERSE LENGTH=256
3	3	3		AT5G14170.1	AT5G14170.1	AT5G14170.1 | Symbols: CHC1 | SWIB/MDM2 domain superfamily protein | chr5:4568696-4570444 REVERSE LENGTH=534
3	2	3		AT5G14060.2;AT5G14060.1	AT5G14060.2;AT5G14060.1	AT5G14060.2 | Symbols: CARAB-AK-LYS | Aspartate kinase family protein | chr5:4536143-4538993 FORWARD LENGTH=544;AT5G14060.1 | Symbols: CARAB-AK-LYS | Aspartate kinase family protein | chr5:4536143-4538993 FORWARD LENGTH=544
3	3	3		AT5G14050.1	AT5G14050.1	AT5G14050.1 | Symbols: | Transducin/WD40 repeat-like superfamily protein | chr5:4533539-4535179 FORWARD LENGTH=546
3	3	3		AT5G14040.1	AT5G14040.1;AT3G48850.1	AT5G14040.1 | Symbols: PHT3;1 | phosphate transporter 3;1 | chr5:4531059-4532965 REVERSE LENGTH=375
0	3	3		AT5G13970.1	AT5G13970.1	AT5G13970.1 | Symbols: | unknown protein;FUNCTIONS IN: molecular_function unknown;INVOLVED IN: biological_process unknown;LOCATED IN: endomembrane system;EXPRESSED IN: 23 plant structures;EXPRESSED DURING: 13 growth stages;BEST Arabidopsis thaliana
0	3	3		AT5G13950.2;AT5G13950.1;AT5G13950.3	AT5G13950.2;AT5G13950.1;AT5G13950.3	AT5G13950.2 | Symbols: | unknown protein;FUNCTIONS IN: molecular_function unknown;INVOLVED IN: biological_process unknown;LOCATED IN: cellular_component unknown;EXPRESSED IN: 23 plant structures;EXPRESSED DURING: 13 growth stages;BEST Arabidopsis th
3	3	3		AT5G13850.1	AT5G13850.1	AT5G13850.1 | Symbols: NACA3 | nascent polypeptide-associated complex subunit alpha-like protein 3 | chr5:4471361-4472676 FORWARD LENGTH=204
3	3	3		AT5G13780.1	AT5G13780.1	AT5G13780.1 | Symbols: | Acyl-CoA N-acyltransferases (NAT) superfamily protein | chr5:4447610-4448603 REVERSE LENGTH=192
3	3	3		AT5G13710.2;AT5G13710.1	AT5G13710.2;AT5G13710.1	AT5G13710.2 | Symbols: SMT1, CPH | sterol methyltransferase 1 | chr5:4424048-4426866 REVERSE LENGTH=336;AT5G13710.1 | Symbols: SMT1, CPH | sterol methyltransferase 1 | chr5:4424048-4426866 REVERSE LENGTH=336
3	3	3		AT5G13650.1;AT5G13650.2	AT5G13650.1;AT5G13650.2	AT5G13650.1 | Symbols: | elongation factor family protein | chr5:4397821-4402364 FORWARD LENGTH=675;AT5G13650.2 | Symbols: | elongation factor family protein | chr5:4397821-4402364 FORWARD LENGTH=676
3	3	3		AT5G13630.1;AT5G13630.2	AT5G13630.1;AT5G13630.2	AT5G13630.1 | Symbols: GUN5, CCH, CHLH, CCH1, ABAR | magnesium-chelatase subunit chlH, chloroplast, putative / Mg-protoporphyrin IX chelatase, putative (CHLH) | chr5:4387567-4392082 REVERSE LENGTH=1381;AT5G13630.2 | Symbols: GUN5, CCH, CHLH, CCH1, ABAR | m
3	3	3		AT5G13590.1	AT5G13590.1	AT5G13590.1 | Symbols: | unknown protein;Has 150 Blast hits to 121 proteins in 42 species: Archae - 0;Bacteria - 8;Metazoa - 80;Fungi - 5;Plants - 17;Viruses - 0;Other Eukaryotes - 40 (source: NCBI BLink). | chr5:4374718-4378647 REVERSE LENGTH=1168
3	3	3		AT5G13530.2;AT5G13530.1	AT5G13530.2;AT5G13530.1	AT5G13530.2 | Symbols: KEG | protein kinases;ubiquitin-protein ligases | chr5:4345618-4354369 FORWARD LENGTH=1624;AT5G13530.1 | Symbols: KEG | protein kinases;ubiquitin-protein ligases | chr5:4345618-4354369 FORWARD LENGTH=1625
3	3	3		AT5G13520.1	AT5G13520.1	AT5G13520.1 | Symbols: | peptidase M1 family protein | chr5:4342117-4344571 REVERSE LENGTH=616
3	3	3		AT5G13510.1	AT5G13510.1	AT5G13510.1 | Symbols: | Ribosomal protein L10 family protein | chr5:4341294-4341956 FORWARD LENGTH=220
3	3	3		AT5G13490.2;AT5G13490.1	AT5G13490.2;AT5G13490.1	AT5G13490.2 | Symbols: AAC2 | ADP/ATP carrier 2 | chr5:4336034-4337379 FORWARD LENGTH=385;AT5G13490.1 | Symbols: AAC2 | ADP/ATP carrier 2 | chr5:4336034-4337379 FORWARD LENGTH=385
3	3	3		AT5G13480.1;AT5G13480.2	AT5G13480.1;AT5G13480.2	AT5G13480.1 | Symbols: FY | Transducin/WD40 repeat-like superfamily protein | chr5:4326638-4331557 REVERSE LENGTH=647;AT5G13480.2 | Symbols: FY | Transducin/WD40 repeat-like superfamily protein | chr5:4326638-4331506 REVERSE LENGTH=653
0	3	2		AT5G13470.1	AT5G13470.1	AT5G13470.1 | Symbols: | unknown protein;Has 1807 Blast hits to 1807 proteins in 277 species: Archae - 0;Bacteria - 0;Metazoa - 736;Fungi - 347;Plants - 385;Viruses - 0;Other Eukaryotes - 339 (source: NCBI BLink). | chr5:4318562-4319720 FORWARD LEN
3	3	3		AT5G13430.1;AT5G13440.1	AT5G13430.1;AT5G13440.1	AT5G13430.1 | Symbols: | Ubiquinol-cytochrome C reductase iron-sulfur subunit | chr5:4305414-4307399 REVERSE LENGTH=272;AT5G13440.1 | Symbols: | Ubiquinol-cytochrome C reductase iron-sulfur subunit | chr5:4308431-4310022 REVERSE LENGTH=274
3	3	3		AT5G13420.1	AT5G13420.1	AT5G13420.1 | Symbols: | Aldolase-type TIM barrel family protein | chr5:4302080-4304212 REVERSE LENGTH=438
3	3	3		AT5G13370.1	AT5G13370.1;AT5G13360.2;AT5G13360.1;AT5G13360.3;AT5G13350.1	AT5G13370.1 | Symbols: | Auxin-responsive GH3 family protein | chr5:4286996-4289424 FORWARD LENGTH=595
1	3	3		AT5G13310.1	AT5G13310.1	AT5G13310.1 | Symbols: | unknown protein;FUNCTIONS IN: molecular_function unknown;INVOLVED IN: biological_process unknown;LOCATED IN: chloroplast;EXPRESSED IN: 13 plant structures;EXPRESSED DURING: 7 growth stages;BEST Arabidopsis thaliana protein m
3	3	3		AT5G13280.1	AT5G13280.1	AT5G13280.1 | Symbols: AK-LYS1, AK1, AK | aspartate kinase 1 | chr5:4249516-4252654 FORWARD LENGTH=569
3	3	3		AT5G13110.1;AT1G24280.1	AT5G13110.1;AT1G24280.1	AT5G13110.1 | Symbols: G6PD2 | glucose-6-phosphate dehydrogenase 2 | chr5:4158952-4161640 FORWARD LENGTH=596;AT1G24280.1 | Symbols: G6PD3 | glucose-6-phosphate dehydrogenase 3 | chr1:8609495-8612383 FORWARD LENGTH=599
1	3	3		AT5G13020.1	AT5G13020.1	AT5G13020.1 | Symbols: | Emsy N Terminus (ENT)/ plant Tudor-like domains-containing protein | chr5:4129691-4132089 REVERSE LENGTH=397
3	3	3		AT5G13010.1	AT5G13010.1	AT5G13010.1 | Symbols: EMB3011 | RNA helicase family protein | chr5:4122747-4128660 FORWARD LENGTH=1255
3	3	3		AT5G12940.1	AT5G12940.1	AT5G12940.1 | Symbols: | Leucine-rich repeat (LRR) family protein | chr5:4087782-4088897 FORWARD LENGTH=371
3	3	3		AT5G12860.2;AT5G12860.1	AT5G12860.2;AT5G12860.1	AT5G12860.2 | Symbols: DiT1 | dicarboxylate transporter 1 | chr5:4059850-4061919 REVERSE LENGTH=556;AT5G12860.1 | Symbols: DiT1 | dicarboxylate transporter 1 | chr5:4059927-4061919 REVERSE LENGTH=557
3	3	3		AT5G12470.1	AT5G12470.1	AT5G12470.1 | Symbols: | Protein of unknown function (DUF3411) | chr5:4044950-4047290 REVERSE LENGTH=386
2	3	1		AT5G12430.1	AT5G12430.1	AT5G12430.1 | Symbols: TPR16 | Heat shock protein DnaJ with tetratricopeptide repeat | chr5:4028475-4034086 REVERSE LENGTH=1165
3	3	3		AT5G12410.1	AT5G12410.1	AT5G12410.1 | Symbols: | THUMP domain-containing protein | chr5:4021974-4023950 REVERSE LENGTH=376
3	3	3		AT5G12250.1	AT5G12250.1	AT5G12250.1 | Symbols: TUB6 | beta-6 tubulin | chr5:3961317-3962971 REVERSE LENGTH=449
0	3	1		AT5G12190.1	AT5G12190.1;AT2G14870.1	AT5G12190.1 | Symbols: | RNA-binding (RRM/RBD/RNP motifs) family protein | chr5:3940731-3941105 REVERSE LENGTH=124
3	3	3		AT5G12140.1	AT5G12140.1	AT5G12140.1 | Symbols: ATCYS1, CYS1 | cystatin-1 | chr5:3923295-3923936 REVERSE LENGTH=101
3	3	3		AT5G12130.1	AT5G12130.1	AT5G12130.1 | Symbols: PDE149, ATTERC | integral membrane TerC family protein | chr5:3919613-3922154 FORWARD LENGTH=384
1	3	2		AT5G12120.1	AT5G12120.1	AT5G12120.1 | Symbols: | Ubiquitin-associated/translation elongation factor EF1B protein | chr5:3916229-3918088 REVERSE LENGTH=619
3	3	3		AT5G12040.1;AT5G12040.2	AT5G12040.1;AT5G12040.2	AT5G12040.1 | Symbols: | Nitrilase/cyanide hydratase and apolipoprotein N-acyltransferase family protein | chr5:3885162-3887772 FORWARD LENGTH=369;AT5G12040.2 | Symbols: | Nitrilase/cyanide hydratase and apolipoprotein N-acyltransferase family protein |
2	3	2		AT5G12010.1	AT5G12010.1	AT5G12010.1 | Symbols: | unknown protein;INVOLVED IN: response to salt stress;LOCATED IN: chloroplast, plasma membrane, membrane;EXPRESSED IN: 23 plant structures;EXPRESSED DURING: 13 growth stages;BEST Arabidopsis thaliana protein match is: unknown
0	3	2		AT5G11860.4;AT5G11860.3;AT5G11860.2;AT5G11860.1	AT5G11860.4;AT5G11860.3;AT5G11860.2;AT5G11860.1	AT5G11860.4 | Symbols: | SCP1-like small phosphatase 5 | chr5:3822024-3823395 REVERSE LENGTH=305;AT5G11860.3 | Symbols: | SCP1-like small phosphatase 5 | chr5:3822024-3823395 REVERSE LENGTH=305;AT5G11860.2 | Symbols: | SCP1-like small phosphatase 5 | ch
0	3	1		AT5G11810.1	AT5G11810.1	AT5G11810.1 | Symbols: | unknown protein;Has 1807 Blast hits to 1807 proteins in 277 species: Archae - 0;Bacteria - 0;Metazoa - 736;Fungi - 347;Plants - 385;Viruses - 0;Other Eukaryotes - 339 (source: NCBI BLink). | chr5:3808739-3810440 FORWARD LEN
2	3	3		AT5G11710.1	AT5G11710.1	AT5G11710.1 | Symbols: | ENTH/VHS family protein | chr5:3772981-3776316 FORWARD LENGTH=560
3	3	3		AT5G11670.1	AT5G11670.1;AT5G25880.1	AT5G11670.1 | Symbols: ATNADP-ME2, NADP-ME2 | NADP-malic enzyme 2 | chr5:3754456-3758040 FORWARD LENGTH=588
2	3	3		AT5G11580.1	AT5G11580.1	AT5G11580.1 | Symbols: | Regulator of chromosome condensation (RCC1) family protein | chr5:3718913-3721125 FORWARD LENGTH=553
3	3	3		AT5G11560.1	AT5G11560.1	AT5G11560.1 | Symbols: | catalytics | chr5:3709734-3713994 REVERSE LENGTH=982
1	3	3		AT5G11530.1	AT5G11530.1	AT5G11530.1 | Symbols: EMF1 | embryonic flower 1 (EMF1) | chr5:3697140-3700930 FORWARD LENGTH=1096
3	3	3		AT5G11520.1	AT5G11520.1	AT5G11520.1 | Symbols: ASP3, YLS4 | aspartate aminotransferase 3 | chr5:3685257-3687721 REVERSE LENGTH=449
1	3	3		AT5G11500.2;AT5G11500.1	AT5G11500.2;AT5G11500.1	AT5G11500.2 | Symbols: | unknown protein;FUNCTIONS IN: molecular_function unknown;INVOLVED IN: biological_process unknown;LOCATED IN: cellular_component unknown;EXPRESSED IN: 24 plant structures;EXPRESSED DURING: 15 growth stages;CONTAINS InterPro D
3	3	3		AT5G11480.1	AT5G11480.1	AT5G11480.1 | Symbols: | P-loop containing nucleoside triphosphate hydrolases superfamily protein | chr5:3669350-3671471 REVERSE LENGTH=318
3	3	3		AT5G11450.1	AT5G11450.1	AT5G11450.1 | Symbols: | Mog1/PsbP/DUF1795-like photosystem II reaction center PsbP family protein | chr5:3654475-3656357 FORWARD LENGTH=297
0	3	2		AT5G11430.1	AT5G11430.1	AT5G11430.1 | Symbols: | SPOC domain / Transcription elongation factor S-II protein | chr5:3648469-3652256 FORWARD LENGTH=873
1	3	3		AT5G11390.1	AT5G11390.1	AT5G11390.1 | Symbols: WIT1 | WPP domain-interacting protein 1 | chr5:3633971-3636418 FORWARD LENGTH=703
3	3	3		AT5G11240.1	AT5G11240.1	AT5G11240.1 | Symbols: | transducin family protein / WD-40 repeat family protein | chr5:3582949-3586782 FORWARD LENGTH=615
3	3	3		AT5G11200.1;AT5G11170.1;AT5G11200.3;AT5G11200.2;AT5G11170.2	AT5G11200.1;AT5G11170.1;AT5G11200.3;AT5G11200.2;AT5G11170.2	AT5G11200.1 | Symbols: | DEAD/DEAH box RNA helicase family protein | chr5:3567389-3570686 FORWARD LENGTH=427;AT5G11170.1 | Symbols: | DEAD/DEAH box RNA helicase family protein | chr5:3553334-3556646 FORWARD LENGTH=427;AT5G11200.3 | Symbols: | DEAD/DEA
3	3	3		AT5G10980.1;AT4G40040.2;AT4G40040.1;AT4G40030.3;AT4G40030.1;AT4G40030.2	AT5G10980.1;AT4G40040.2;AT4G40040.1;AT4G40030.3;AT4G40030.1;AT4G40030.2;AT1G75600.1	AT5G10980.1 | Symbols: | Histone superfamily protein | chr5:3472591-3473349 REVERSE LENGTH=136;AT4G40040.2 | Symbols: | Histone superfamily protein | chr4:18557539-18558236 REVERSE LENGTH=136;AT4G40040.1 | Symbols: | Histone superfamily protein | chr4:1
3	3	3		AT5G10950.1	AT5G10950.1	AT5G10950.1 | Symbols: | Tudor/PWWP/MBT superfamily protein | chr5:3459557-3461632 REVERSE LENGTH=395
1	3	3		AT5G10920.1	AT5G10920.1	AT5G10920.1 | Symbols: | L-Aspartase-like family protein | chr5:3441805-3443892 FORWARD LENGTH=517
3	3	3		AT5G10860.1	AT5G10860.1	AT5G10860.1 | Symbols: | Cystathionine beta-synthase (CBS) family protein | chr5:3429173-3430142 REVERSE LENGTH=206
0	3	2		AT5G10830.1	AT5G10830.1	AT5G10830.1 | Symbols: | S-adenosyl-L-methionine-dependent methyltransferases superfamily protein | chr5:3423731-3424649 FORWARD LENGTH=261
1	3	3		AT5G10740.1	AT5G10740.1	AT5G10740.1 | Symbols: | Protein phosphatase 2C family protein | chr5:3393797-3395848 REVERSE LENGTH=354
3	3	3		AT5G10630.1;AT5G10630.2	AT5G10630.1;AT5G10630.2	AT5G10630.1 | Symbols: | Translation elongation factor EF1A/initiation factor IF2gamma family protein | chr5:3360561-3364414 FORWARD LENGTH=667;AT5G10630.2 | Symbols: | Translation elongation factor EF1A/initiation factor IF2gamma family protein | chr5:3
3	3	3		AT5G10470.1;AT5G10470.2	AT5G10470.1;AT5G10470.2	AT5G10470.1 | Symbols: KCA1, KAC1 | kinesin like protein for actin based chloroplast movement 1 | chr5:3290121-3297248 REVERSE LENGTH=1273;AT5G10470.2 | Symbols: KAC1 | kinesin like protein for actin based chloroplast movement 1 | chr5:3290121-3297248 REVE
3	3	3		AT5G10450.2;AT5G10450.1;AT5G10450.3;AT5G10450.4	AT5G10450.2;AT5G10450.1;AT5G10450.3;AT5G10450.4	AT5G10450.2 | Symbols: GRF6, AFT1, 14-3-3lambda | G-box regulating factor 6 | chr5:3284452-3286261 REVERSE LENGTH=246;AT5G10450.1 | Symbols: GRF6, AFT1, 14-3-3lambda | G-box regulating factor 6 | chr5:3284452-3286261 REVERSE LENGTH=248;AT5G10450.3 | Symbol
3	3	3		AT5G10360.1;AT5G10360.2	AT5G10360.1;AT5G10360.2	AT5G10360.1 | Symbols: EMB3010, RPS6B | Ribosomal protein S6e | chr5:3258734-3260142 REVERSE LENGTH=249;AT5G10360.2 | Symbols: EMB3010 | Ribosomal protein S6e | chr5:3258734-3260142 REVERSE LENGTH=197
3	3	3		AT5G10240.2;AT5G10240.1	AT5G10240.2;AT5G10240.1	AT5G10240.2 | Symbols: ASN3 | asparagine synthetase 3 | chr5:3212934-3216418 REVERSE LENGTH=577;AT5G10240.1 | Symbols: ASN3 | asparagine synthetase 3 | chr5:3212934-3216418 REVERSE LENGTH=578
0	3	0		AT5G10110.1	AT5G10110.1	AT5G10110.1 | Symbols: | unknown protein;BEST Arabidopsis thaliana protein match is: unknown protein (TAIR:AT5G65120.1);Has 30201 Blast hits to 17322 proteins in 780 species: Archae - 12;Bacteria - 1396;Metazoa - 17338;Fungi - 3422;Plants - 5037;Vi
3	3	3		AT5G10060.1	AT5G10060.1	AT5G10060.1 | Symbols: | ENTH/VHS family protein | chr5:3145994-3148049 REVERSE LENGTH=469
3	3	3		AT5G10010.1	AT5G10010.1	AT5G10010.1 | Symbols: | unknown protein;FUNCTIONS IN: molecular_function unknown;INVOLVED IN: biological_process unknown;LOCATED IN: nucleolus;EXPRESSED IN: 25 plant structures;EXPRESSED DURING: 15 growth stages;BEST Arabidopsis thaliana protein ma
0	3	0		AT5G09960.1	AT5G09960.1	AT5G09960.1 | Symbols: | FUNCTIONS IN: molecular_function unknown;INVOLVED IN: biological_process unknown;LOCATED IN: plasma membrane;EXPRESSED IN: 22 plant structures;EXPRESSED DURING: 13 growth stages;CONTAINS InterPro DOMAIN/s: RPM1-interacting pr
3	3	3		AT5G09900.1;AT5G09900.2;AT5G09900.3	AT5G09900.1;AT5G09900.2;AT5G09900.3;AT5G64760.2;AT5G64760.1	AT5G09900.1 | Symbols: EMB2107, RPN5A, MSA | 26S proteasome regulatory subunit, putative (RPN5) | chr5:3089462-3092434 REVERSE LENGTH=442;AT5G09900.2 | Symbols: EMB2107, RPN5A, MSA | 26S proteasome regulatory subunit, putative (RPN5) | chr5:3089462-3092434
3	3	3		AT5G09880.1	AT5G09880.1	AT5G09880.1 | Symbols: | Splicing factor, CC1-like | chr5:3081646-3085179 REVERSE LENGTH=527
3	3	3		AT5G09860.2;AT5G09860.1	AT5G09860.2;AT5G09860.1	AT5G09860.2 | Symbols: THO1 | nuclear matrix protein-related | chr5:3066815-3070733 FORWARD LENGTH=598;AT5G09860.1 | Symbols: AtTHO1, THO1, AtHPR1, HPR1 | nuclear matrix protein-related | chr5:3066815-3070733 FORWARD LENGTH=599
3	3	3		AT5G09850.1	AT5G09850.1	AT5G09850.1 | Symbols: | Transcription elongation factor (TFIIS) family protein | chr5:3063488-3065221 REVERSE LENGTH=353
3	3	3		AT5G09810.1	AT5G09810.1	AT5G09810.1 | Symbols: ACT7 | actin 7 | chr5:3052809-3054220 FORWARD LENGTH=377
0	3	0		AT5G09680.2;AT5G09680.1	AT5G09680.2;AT5G09680.1	AT5G09680.2 | Symbols: RLF | reduced lateral root formation | chr5:2999362-3000185 REVERSE LENGTH=211;AT5G09680.1 | Symbols: RLF | reduced lateral root formation | chr5:2999362-3000185 REVERSE LENGTH=211
3	3	3		AT5G09660.2;AT5G09660.1;AT5G09660.3;AT5G09660.4	AT5G09660.2;AT5G09660.1;AT5G09660.3;AT5G09660.4	AT5G09660.2 | Symbols: PMDH2 | peroxisomal NAD-malate dehydrogenase 2 | chr5:2993645-2995169 REVERSE LENGTH=333;AT5G09660.1 | Symbols: PMDH2 | peroxisomal NAD-malate dehydrogenase 2 | chr5:2993645-2995551 REVERSE LENGTH=354;AT5G09660.3 | Symbols: PMDH2 | p
1	3	3		AT5G09620.1	AT5G09620.1	AT5G09620.1 | Symbols: | Octicosapeptide/Phox/Bem1p family protein | chr5:2983757-2985352 REVERSE LENGTH=531
1	3	3		AT5G09390.2;AT5G09390.1	AT5G09390.2;AT5G09390.1	AT5G09390.2 | Symbols: | CD2-binding protein-related | chr5:2913591-2915803 FORWARD LENGTH=349;AT5G09390.1 | Symbols: | CD2-binding protein-related | chr5:2913591-2915803 FORWARD LENGTH=351
3	2	3		AT5G09230.5;AT5G09230.2;AT5G09230.1;AT5G09230.7;AT5G09230.6;AT5G09230.4;AT5G09230.3	AT5G09230.5;AT5G09230.2;AT5G09230.1;AT5G09230.7;AT5G09230.6;AT5G09230.4;AT5G09230.3	AT5G09230.5 | Symbols: SRT2 | sirtuin 2 | chr5:2871839-2873613 FORWARD LENGTH=354;AT5G09230.2 | Symbols: SRT2 | sirtuin 2 | chr5:2871655-2873613 FORWARD LENGTH=373;AT5G09230.1 | Symbols: SRT2, AtSRT2 | sirtuin 2 | chr5:2871655-2873613 FORWARD LENGTH=373;AT
3	3	3		AT5G08690.1;AT5G08670.1;AT5G08680.1	AT5G08690.1;AT5G08670.1;AT5G08680.1	AT5G08690.1 | Symbols: | ATP synthase alpha/beta family protein | chr5:2825739-2828352 FORWARD LENGTH=556;AT5G08670.1 | Symbols: | ATP synthase alpha/beta family protein | chr5:2818395-2821149 REVERSE LENGTH=556;AT5G08680.1 | Symbols: | ATP synthase alp
1	3	3		AT5G08660.1	AT5G08660.1	AT5G08660.1 | Symbols: | Protein of unknown function (DUF668) | chr5:2814526-2817845 FORWARD LENGTH=649
3	3	3		AT5G08650.1	AT5G08650.1	AT5G08650.1 | Symbols: | Small GTP-binding protein | chr5:2806533-2813220 REVERSE LENGTH=681
3	3	3		AT5G08610.1	AT5G08610.1;AT5G63630.1	AT5G08610.1 | Symbols: | P-loop containing nucleoside triphosphate hydrolases superfamily protein | chr5:2790341-2794059 FORWARD LENGTH=850
3	3	3		AT5G08570.1	AT5G08570.1;AT3G25960.1;AT3G04050.1;AT3G55650.1	AT5G08570.1 | Symbols: | Pyruvate kinase family protein | chr5:2778433-2780300 FORWARD LENGTH=510
3	3	3		AT5G08560.2;AT5G08560.1	AT5G08560.2;AT5G08560.1	AT5G08560.2 | Symbols: | transducin family protein / WD-40 repeat family protein | chr5:2771104-2773827 REVERSE LENGTH=589;AT5G08560.1 | Symbols: | transducin family protein / WD-40 repeat family protein | chr5:2771104-2773827 REVERSE LENGTH=589
3	3	3		AT5G08550.1	AT5G08550.1	AT5G08550.1 | Symbols: ILP1 | GC-rich sequence DNA-binding factor-like protein | chr5:2765981-2770282 REVERSE LENGTH=908
3	3	3		AT5G08530.1	AT5G08530.1	AT5G08530.1 | Symbols: CI51 | 51 kDa subunit of complex I | chr5:2759848-2761726 REVERSE LENGTH=486
3	3	3		AT5G08450.3;AT5G08450.2;AT5G08450.1	AT5G08450.3;AT5G08450.2;AT5G08450.1	AT5G08450.3 | Symbols: | FUNCTIONS IN: molecular_function unknown;INVOLVED IN: biological_process unknown;LOCATED IN: cellular_component unknown;EXPRESSED IN: 25 plant structures;EXPRESSED DURING: 15 growth stages;CONTAINS InterPro DOMAIN/s: Histone
1	3	1		AT5G08330.1;AT5G23280.1	AT5G08330.1;AT5G23280.1	AT5G08330.1 | Symbols: | TCP family transcription factor | chr5:2680828-2681547 FORWARD LENGTH=239;AT5G23280.1 | Symbols: | TCP family transcription factor | chr5:7843017-7843769 FORWARD LENGTH=250
3	3	3		AT5G08300.1	AT5G08300.1;AT5G23250.2;AT5G23250.1	AT5G08300.1 | Symbols: | Succinyl-CoA ligase, alpha subunit | chr5:2667579-2669672 FORWARD LENGTH=347
3	3	3		AT5G08280.1	AT5G08280.1	AT5G08280.1 | Symbols: HEMC | hydroxymethylbilane synthase | chr5:2663763-2665596 REVERSE LENGTH=382
0	3	0		AT5G08200.1	AT5G08200.1	AT5G08200.1 | Symbols: | peptidoglycan-binding LysM domain-containing protein | chr5:2638385-2640508 FORWARD LENGTH=409
3	3	3		AT5G08180.2;AT5G08180.1	AT5G08180.2;AT5G08180.1	AT5G08180.2 | Symbols: | Ribosomal protein L7Ae/L30e/S12e/Gadd45 family protein | chr5:2631843-2633374 REVERSE LENGTH=156;AT5G08180.1 | Symbols: | Ribosomal protein L7Ae/L30e/S12e/Gadd45 family protein | chr5:2631843-2633374 REVERSE LENGTH=156
0	3	3		AT5G08170.1	AT5G08170.1	AT5G08170.1 | Symbols: EMB1873, ATAIH | porphyromonas-type peptidyl-arginine deiminase family protein | chr5:2628663-2631047 REVERSE LENGTH=383
0	3	3		AT5G08130.4;AT5G08130.2;AT5G08130.1;AT5G08130.6	AT5G08130.4;AT5G08130.2;AT5G08130.1;AT5G08130.6	AT5G08130.4 | Symbols: BIM1 | basic helix-loop-helix (bHLH) DNA-binding superfamily protein | chr5:2606655-2609571 REVERSE LENGTH=529;AT5G08130.2 | Symbols: BIM1 | basic helix-loop-helix (bHLH) DNA-binding superfamily protein | chr5:2606655-2609571 REVERSE
3	3	3		AT5G08080.2;AT5G08080.1;AT5G08080.3	AT5G08080.2;AT5G08080.1;AT5G08080.3	AT5G08080.2 | Symbols: SYP132, ATSYP132 | syntaxin of plants 132 | chr5:2588532-2590488 FORWARD LENGTH=223;AT5G08080.1 | Symbols: SYP132, ATSYP132 | syntaxin of plants 132 | chr5:2588532-2591106 FORWARD LENGTH=304;AT5G08080.3 | Symbols: SYP132 | syntaxin o
3	3	3		AT5G07980.1	AT5G07980.1	AT5G07980.1 | Symbols: | dentin sialophosphoprotein-related | chr5:2549432-2554669 REVERSE LENGTH=1501
2	3	3		AT5G07970.1	AT5G07970.1	AT5G07970.1 | Symbols: | dentin sialophosphoprotein-related | chr5:2544126-2547916 REVERSE LENGTH=1097
0	3	3		AT5G07940.3;AT5G07940.2;AT5G07940.1	AT5G07940.3;AT5G07940.2;AT5G07940.1	AT5G07940.3 | Symbols: | FUNCTIONS IN: molecular_function unknown;INVOLVED IN: biological_process unknown;LOCATED IN: cellular_component unknown;EXPRESSED IN: pollen tube;BEST Arabidopsis thaliana protein match is: dentin sialophosphoprotein-related (
0	3	3		AT5G07460.1	AT5G07460.1	AT5G07460.1 | Symbols: PMSR2, ATMSRA2 | peptidemethionine sulfoxide reductase 2 | chr5:2360844-2361885 REVERSE LENGTH=218
3	3	3		AT5G07440.2;AT5G07440.1;AT5G07440.3	AT5G07440.2;AT5G07440.1;AT5G07440.3;AT5G18170.1;AT3G03910.1	AT5G07440.2 | Symbols: GDH2 | glutamate dehydrogenase 2 | chr5:2356153-2358012 FORWARD LENGTH=411;AT5G07440.1 | Symbols: GDH2 | glutamate dehydrogenase 2 | chr5:2356153-2358012 FORWARD LENGTH=411;AT5G07440.3 | Symbols: GDH2 | glutamate dehydrogenase 2 | ch
3	3	3		AT5G07350.1;AT5G07350.2	AT5G07350.1;AT5G07350.2	AT5G07350.1 | Symbols: Tudor1, AtTudor1, TSN1 | TUDOR-SN protein 1 | chr5:2320344-2324892 REVERSE LENGTH=991;AT5G07350.2 | Symbols: Tudor1, AtTudor1, TSN1 | TUDOR-SN protein 1 | chr5:2320021-2324892 REVERSE LENGTH=1007
2	3	2		AT5G07220.1	AT5G07220.1;AT5G62100.2;AT5G62100.1	AT5G07220.1 | Symbols: ATBAG3, BAG3 | BCL-2-associated athanogene 3 | chr5:2265545-2266720 REVERSE LENGTH=303
3	3	3		AT5G07030.1	AT5G07030.1	AT5G07030.1 | Symbols: | Eukaryotic aspartyl protease family protein | chr5:2183600-2185717 REVERSE LENGTH=455
3	3	3		AT5G06970.1	AT5G06970.1	AT5G06970.1 | Symbols: | Protein of unknown function (DUF810) | chr5:2158431-2166004 REVERSE LENGTH=1101
0	3	0		AT5G06960.2;AT5G06960.1	AT5G06960.2;AT5G06960.1	AT5G06960.2 | Symbols: OBF5, TGA5 | OCS-element binding factor 5 | chr5:2155742-2157400 FORWARD LENGTH=330;AT5G06960.1 | Symbols: OBF5, TGA5 | OCS-element binding factor 5 | chr5:2155742-2157400 FORWARD LENGTH=330
3	3	3		AT5G06910.1	AT5G06910.1	AT5G06910.1 | Symbols: ATJ6 | J-domain protein 6 | chr5:2140598-2142525 FORWARD LENGTH=284
3	3	3		AT5G06600.2;AT5G06600.1;AT5G06600.3	AT5G06600.2;AT5G06600.1;AT5G06600.3	AT5G06600.2 | Symbols: UBP12 | ubiquitin-specific protease 12 | chr5:2019545-2027834 REVERSE LENGTH=1115;AT5G06600.1 | Symbols: UBP12 | ubiquitin-specific protease 12 | chr5:2019545-2027834 REVERSE LENGTH=1116;AT5G06600.3 | Symbols: UBP12 | ubiquitin-speci
1	3	1		AT5G06560.1	AT5G06560.1	AT5G06560.1 | Symbols: | Protein of unknown function, DUF593 | chr5:2003678-2005543 REVERSE LENGTH=518
0	3	1		AT5G06550.1	AT5G06550.1	AT5G06550.1 | Symbols: | CONTAINS InterPro DOMAIN/s: Transcription factor jumonji/aspartyl beta-hydroxylase (InterPro:IPR003347), F-box domain, Skp2-like (InterPro:IPR022364), Transcription factor jumonji (InterPro:IPR013129);BEST Arabidopsis thaliana pr
3	3	3		AT5G06460.1	AT5G06460.1	AT5G06460.1 | Symbols: ATUBA2, UBA 2 | ubiquitin activating enzyme 2 | chr5:1970239-1974382 FORWARD LENGTH=1077
3	3	3		AT5G06360.1	AT5G06360.1	AT5G06360.1 | Symbols: | Ribosomal protein S8e family protein | chr5:1944835-1946512 FORWARD LENGTH=260
1	3	1		AT5G06350.1	AT5G06350.1	AT5G06350.1 | Symbols: | ARM repeat superfamily protein | chr5:1938781-1944197 FORWARD LENGTH=877
3	3	3		AT5G06320.1	AT5G06320.1;AT2G35460.1	AT5G06320.1 | Symbols: NHL3 | NDR1/HIN1-like 3 | chr5:1931016-1931711 REVERSE LENGTH=231
2	3	3		AT5G06260.1	AT5G06260.1;AT4G34070.1	AT5G06260.1 | Symbols: | TLD-domain containing nucleolar protein | chr5:1902755-1904835 REVERSE LENGTH=424
3	3	3		AT5G06160.1	AT5G06160.1	AT5G06160.1 | Symbols: ATO | splicing factor-related | chr5:1862623-1866298 REVERSE LENGTH=504
3	3	3		AT5G06110.2;AT5G06110.1	AT5G06110.2;AT5G06110.1	AT5G06110.2 | Symbols: | DnaJ domain;Myb-like DNA-binding domain | chr5:1841009-1843000 REVERSE LENGTH=663;AT5G06110.1 | Symbols: | DnaJ domain;Myb-like DNA-binding domain | chr5:1841009-1843000 REVERSE LENGTH=663
3	3	3		AT5G06060.1	AT5G06060.1;AT2G29350.2;AT2G29350.3;AT2G29290.1;AT2G29370.1;AT2G29350.1;AT2G29360.1	AT5G06060.1 | Symbols: | NAD(P)-binding Rossmann-fold superfamily protein | chr5:1824066-1825833 REVERSE LENGTH=264
0	3	2		AT5G05970.1;AT5G05970.2	AT5G05970.1;AT5G05970.2	AT5G05970.1 | Symbols: NEDD1 | Transducin/WD40 repeat-like superfamily protein | chr5:1795464-1799313 FORWARD LENGTH=781;AT5G05970.2 | Symbols: NEDD1 | Transducin/WD40 repeat-like superfamily protein | chr5:1795464-1799313 FORWARD LENGTH=782
3	3	3		AT5G05620.1	AT5G05620.1	AT5G05620.1 | Symbols: TUBG2, ATGCP2, GCP2 | gamma-tubulin complex protein 2 | chr5:1679340-1681719 FORWARD LENGTH=474
0	3	3		AT5G05600.1	AT5G05600.1;AT3G11180.1;AT3G11180.2	AT5G05600.1 | Symbols: | 2-oxoglutarate (2OG) and Fe(II)-dependent oxygenase superfamily protein | chr5:1672266-1674602 FORWARD LENGTH=371
3	3	3		AT5G05570.2;AT5G05570.1	AT5G05570.2;AT5G05570.1	AT5G05570.2 | Symbols: | transducin family protein / WD-40 repeat family protein | chr5:1656766-1663728 FORWARD LENGTH=1099;AT5G05570.1 | Symbols: | transducin family protein / WD-40 repeat family protein | chr5:1656766-1663728 FORWARD LENGTH=1124
0	3	3		AT5G05550.1;AT5G05550.2	AT5G05550.1;AT5G05550.2	AT5G05550.1 | Symbols: | sequence-specific DNA binding transcription factors | chr5:1639344-1640550 REVERSE LENGTH=246;AT5G05550.2 | Symbols: | sequence-specific DNA binding transcription factors | chr5:1639529-1640550 REVERSE LENGTH=249
3	3	3		AT5G05470.1	AT5G05470.1	AT5G05470.1 | Symbols: EIF2 ALPHA, ATEIF2-A2, EIF2-A2 | eukaryotic translation initiation factor 2 alpha subunit | chr5:1620579-1622214 FORWARD LENGTH=344
3	3	3		AT5G05450.1	AT5G05450.1	AT5G05450.1 | Symbols: | P-loop containing nucleoside triphosphate hydrolases superfamily protein | chr5:1612077-1615195 FORWARD LENGTH=593
1	3	3		AT5G05230.1	AT5G05230.1	AT5G05230.1 | Symbols: | RING/U-box superfamily protein | chr5:1551593-1553543 FORWARD LENGTH=363
3	3	3		AT5G05170.1	AT5G05170.1;AT1G32180.1;AT5G44030.1;AT4G38190.1;AT5G16910.1;AT3G03050.1;AT1G02730.1	AT5G05170.1 | Symbols: CESA3, IXR1, ATCESA3, ATH-B, CEV1 | Cellulose synthase family protein | chr5:1530401-1535090 REVERSE LENGTH=1065
3	3	3		AT5G05010.2;AT5G05010.1	AT5G05010.2;AT5G05010.1	AT5G05010.2 | Symbols: | clathrin adaptor complexes medium subunit family protein | chr5:1477137-1479872 FORWARD LENGTH=527;AT5G05010.1 | Symbols: | clathrin adaptor complexes medium subunit family protein | chr5:1477137-1479872 FORWARD LENGTH=527
3	3	3		AT5G05000.3;AT5G05000.2;AT5G05000.1	AT5G05000.3;AT5G05000.2;AT5G05000.1	AT5G05000.3 | Symbols: TOC34, ATTOC34, OEP34 | translocon at the outer envelope membrane of chloroplasts 34 | chr5:1474262-1475772 REVERSE LENGTH=313;AT5G05000.2 | Symbols: TOC34, ATTOC34, OEP34 | translocon at the outer envelope membrane of chloroplasts 3
1	3	3		AT5G04990.1	AT5G04990.1	AT5G04990.1 | Symbols: SUN1, ATSUN1 | SAD1/UNC-84 domain protein 1 | chr5:1471698-1473770 REVERSE LENGTH=471
2	3	3		AT5G04940.2;AT5G04940.1	AT5G04940.2;AT5G04940.1	AT5G04940.2 | Symbols: SUVH1 | SU(VAR)3-9 homolog 1 | chr5:1454616-1456628 REVERSE LENGTH=670;AT5G04940.1 | Symbols: SUVH1 | SU(VAR)3-9 homolog 1 | chr5:1454616-1456628 REVERSE LENGTH=670
3	3	2		AT5G04870.1	AT5G04870.1;AT3G10660.1	AT5G04870.1 | Symbols: CPK1, ATCPK1 | calcium dependent protein kinase 1 | chr5:1417015-1419877 REVERSE LENGTH=610
0	3	2		AT5G04850.1;AT5G04850.2;AT3G10640.2;AT3G10640.1	AT5G04850.1;AT5G04850.2;AT3G10640.2;AT3G10640.1	AT5G04850.1 | Symbols: VPS60.2 | SNF7 family protein | chr5:1408246-1409806 REVERSE LENGTH=235;AT5G04850.2 | Symbols: VPS60.2 | SNF7 family protein | chr5:1408246-1409806 REVERSE LENGTH=272;AT3G10640.2 | Symbols: VPS60.1 | SNF7 family protein | chr3:332350
3	3	3		AT5G04600.1	AT5G04600.1	AT5G04600.1 | Symbols: | RNA-binding (RRM/RBD/RNP motifs) family protein | chr5:1323700-1325486 FORWARD LENGTH=222
3	3	3		AT5G04590.1	AT5G04590.1	AT5G04590.1 | Symbols: SIR | sulfite reductase | chr5:1319404-1322298 FORWARD LENGTH=642
3	3	3		AT5G04530.1	AT5G04530.1	AT5G04530.1 | Symbols: KCS19 | 3-ketoacyl-CoA synthase 19 | chr5:1292222-1293616 REVERSE LENGTH=464
3	3	3		AT5G04430.1;AT5G04430.2	AT5G04430.1;AT5G04430.2	AT5G04430.1 | Symbols: BTR1, BTR1S | binding to TOMV RNA 1L (long form) | chr5:1250602-1253523 REVERSE LENGTH=313;AT5G04430.2 | Symbols: BTR1, BTR1L | binding to TOMV RNA 1L (long form) | chr5:1250602-1253523 REVERSE LENGTH=334
3	3	3		AT5G04290.1	AT5G04290.1	AT5G04290.1 | Symbols: KTF1, SPT5L | kow domain-containing transcription factor 1 | chr5:1196069-1202653 FORWARD LENGTH=1493
3	3	3		AT5G04280.1	AT5G04280.1	AT5G04280.1 | Symbols: | RNA-binding (RRM/RBD/RNP motifs) family protein with retrovirus zinc finger-like domain | chr5:1192461-1195413 FORWARD LENGTH=310
3	3	3		AT5G04140.1;AT5G04140.2	AT5G04140.1;AT5G04140.2;AT2G41220.1	AT5G04140.1 | Symbols: GLU1, GLS1, GLUS, FD-GOGAT | glutamate synthase 1 | chr5:1130031-1138186 FORWARD LENGTH=1622;AT5G04140.2 | Symbols: GLU1, GLS1, GLUS, FD-GOGAT | glutamate synthase 1 | chr5:1130031-1138186 FORWARD LENGTH=1648
3	3	3		AT5G04130.1;AT5G04130.2	AT5G04130.1;AT5G04130.2	AT5G04130.1 | Symbols: GYRB2 | DNA GYRASE B2 | chr5:1122084-1128031 REVERSE LENGTH=732;AT5G04130.2 | Symbols: | DNA GYRASE B2 | chr5:1123729-1128031 REVERSE LENGTH=519
3	3	3		AT5G03940.1	AT5G03940.1	AT5G03940.1 | Symbols: FFC, 54CP, CPSRP54, SRP54CP | chloroplast signal recognition particle 54 kDa subunit | chr5:1060265-1063257 REVERSE LENGTH=564
3	3	3		AT5G03860.2;AT5G03860.1	AT5G03860.2;AT5G03860.1	AT5G03860.2 | Symbols: MLS | malate synthase | chr5:1032276-1034527 REVERSE LENGTH=562;AT5G03860.1 | Symbols: MLS | malate synthase | chr5:1032276-1034527 REVERSE LENGTH=562
3	3	3		AT5G03850.1;AT3G10090.1	AT5G03850.1;AT3G10090.1	AT5G03850.1 | Symbols: | Nucleic acid-binding, OB-fold-like protein | chr5:1028542-1028736 REVERSE LENGTH=64;AT3G10090.1 | Symbols: | Nucleic acid-binding, OB-fold-like protein | chr3:3108960-3109154 REVERSE LENGTH=64
3	3	3		AT5G03740.1	AT5G03740.1	AT5G03740.1 | Symbols: HD2C, HDT3 | histone deacetylase 2C | chr5:981994-983961 FORWARD LENGTH=294
1	3	3		AT5G03660.1;AT5G03660.2	AT5G03660.1;AT5G03660.2	AT5G03660.1 | Symbols: | Family of unknown function (DUF662) | chr5:938068-939811 FORWARD LENGTH=173;AT5G03660.2 | Symbols: | Family of unknown function (DUF662) | chr5:938068-939811 FORWARD LENGTH=151
3	3	3		AT5G03650.1	AT5G03650.1	AT5G03650.1 | Symbols: SBE2.2 | starch branching enzyme 2.2 | chr5:931924-937470 FORWARD LENGTH=805
3	3	3		AT5G03630.1	AT5G03630.1	AT5G03630.1 | Symbols: ATMDAR2 | Pyridine nucleotide-disulphide oxidoreductase family protein | chr5:922378-924616 REVERSE LENGTH=435
0	3	1		AT5G03415.2;AT5G03415.1	AT5G03415.2;AT5G03415.1	AT5G03415.2 | Symbols: DPB | Transcription factor DP | chr5:842842-845200 FORWARD LENGTH=379;AT5G03415.1 | Symbols: DPB, ATDPB | Transcription factor DP | chr5:842842-845200 FORWARD LENGTH=385
3	3	3		AT5G03300.1	AT5G03300.1	AT5G03300.1 | Symbols: ADK2 | adenosine kinase 2 | chr5:796573-798997 FORWARD LENGTH=345
3	3	3		AT5G03290.1	AT5G03290.1;AT3G09810.1	AT5G03290.1 | Symbols: IDH-V | isocitrate dehydrogenase V | chr5:794043-795939 FORWARD LENGTH=374
3	3	3		AT5G03280.1	AT5G03280.1	AT5G03280.1 | Symbols: EIN2, PIR2, CKR1, ERA3, ORE3, ORE2, ATEIN2 | NRAMP metal ion transporter family protein | chr5:788589-793066 FORWARD LENGTH=1294
3	3	3		AT5G03040.3;AT5G03040.2;AT5G03040.1	AT5G03040.3;AT5G03040.2;AT5G03040.1	AT5G03040.3 | Symbols: iqd2 | IQ-domain 2 | chr5:710380-712406 REVERSE LENGTH=461;AT5G03040.2 | Symbols: iqd2 | IQ-domain 2 | chr5:710380-712406 REVERSE LENGTH=461;AT5G03040.1 | Symbols: iqd2 | IQ-domain 2 | chr5:710380-712406 REVERSE LENGTH=461
3	3	3		AT5G02960.1;AT3G09680.1	AT5G02960.1;AT3G09680.1	AT5G02960.1 | Symbols: | Ribosomal protein S12/S23 family protein | chr5:693280-694396 REVERSE LENGTH=142;AT3G09680.1 | Symbols: | Ribosomal protein S12/S23 family protein | chr3:2969197-2970291 REVERSE LENGTH=142
3	3	3		AT5G02890.1	AT5G02890.1	AT5G02890.1 | Symbols: | HXXXD-type acyl-transferase family protein | chr5:670207-671454 REVERSE LENGTH=353
3	3	3		AT5G02870.1;AT5G02870.2	AT5G02870.1;AT5G02870.2	AT5G02870.1 | Symbols: | Ribosomal protein L4/L1 family | chr5:657830-659526 FORWARD LENGTH=407;AT5G02870.2 | Symbols: | Ribosomal protein L4/L1 family | chr5:657830-659526 FORWARD LENGTH=406
2	3	3		AT5G02820.1	AT5G02820.1	AT5G02820.1 | Symbols: RHL2, BIN5 | Spo11/DNA topoisomerase VI, subunit A protein | chr5:642658-644123 FORWARD LENGTH=427
0	3	2		AT5G02810.1	AT5G02810.1	AT5G02810.1 | Symbols: PRR7, APRR7 | pseudo-response regulator 7 | chr5:638283-641461 REVERSE LENGTH=727
0	3	2		AT5G02770.1	AT5G02770.1	AT5G02770.1 | Symbols: | unknown protein;Has 469 Blast hits to 336 proteins in 126 species: Archae - 0;Bacteria - 54;Metazoa - 249;Fungi - 22;Plants - 47;Viruses - 0;Other Eukaryotes - 97 (source: NCBI BLink). | chr5:628101-629168 REVERSE LENGTH=21
3	1	3		AT5G02740.1;AT5G02740.2	AT5G02740.1;AT5G02740.2	AT5G02740.1 | Symbols: | Ribosomal protein S24e family protein | chr5:616517-618267 FORWARD LENGTH=228;AT5G02740.2 | Symbols: | Ribosomal protein S24e family protein | chr5:616517-617721 FORWARD LENGTH=185
3	3	3		AT5G02560.1;AT5G02560.2	AT5G02560.1;AT5G02560.2	AT5G02560.1 | Symbols: HTA12 | histone H2A 12 | chr5:575437-576456 FORWARD LENGTH=153;AT5G02560.2 | Symbols: HTA12 | histone H2A 12 | chr5:575437-576456 FORWARD LENGTH=177
3	3	3		AT5G02530.2;AT5G02530.1	AT5G02530.2;AT5G02530.1	AT5G02530.2 | Symbols: | RNA-binding (RRM/RBD/RNP motifs) family protein | chr5:564332-565776 REVERSE LENGTH=290;AT5G02530.1 | Symbols: | RNA-binding (RRM/RBD/RNP motifs) family protein | chr5:564332-565776 REVERSE LENGTH=292
3	3	3		AT5G02500.1;AT5G02500.2	AT5G02500.1;AT5G02500.2	AT5G02500.1 | Symbols: HSC70-1, HSP70-1, AT-HSC70-1, HSC70 | heat shock cognate protein 70-1 | chr5:554055-556334 REVERSE LENGTH=651;AT5G02500.2 | Symbols: HSC70-1, HSP70-1, AT-HSC70-1, HSC70 | heat shock cognate protein 70-1 | chr5:554055-556334 REVERSE L
3	3	3		AT5G02490.1;AT1G56410.1	AT5G02490.1;AT1G56410.1	AT5G02490.1 | Symbols: | Heat shock protein 70 (Hsp 70) family protein | chr5:550296-552565 REVERSE LENGTH=653;AT1G56410.1 | Symbols: ERD2, HSP70T-1 | heat shock protein 70 (Hsp 70) family protein | chr1:21117147-21119241 FORWARD LENGTH=617
0	3	2		AT5G02480.1	AT5G02480.1	AT5G02480.1 | Symbols: | HSP20-like chaperones superfamily protein | chr5:548152-549678 FORWARD LENGTH=508
3	3	3		AT5G02450.1	AT5G02450.1	AT5G02450.1 | Symbols: | Ribosomal protein L36e family protein | chr5:533501-534394 FORWARD LENGTH=108
3	3	3		AT5G02310.1	AT5G02310.1	AT5G02310.1 | Symbols: PRT6 | proteolysis 6 | chr5:474279-482552 FORWARD LENGTH=2006
3	3	3		AT5G02240.1	AT5G02240.1	AT5G02240.1 | Symbols: | NAD(P)-binding Rossmann-fold superfamily protein | chr5:451502-452984 FORWARD LENGTH=253
3	3	3		AT5G02160.1	AT5G02160.1	AT5G02160.1 | Symbols: | unknown protein;FUNCTIONS IN: molecular_function unknown;INVOLVED IN: biological_process unknown;LOCATED IN: chloroplast thylakoid membrane;EXPRESSED IN: 23 plant structures;EXPRESSED DURING: 13 growth stages;Has 121 Blast h
3	3	3		AT5G01920.1	AT5G01920.1	AT5G01920.1 | Symbols: STN8 | Protein kinase superfamily protein | chr5:359154-360867 FORWARD LENGTH=495
3	3	3		AT5G01590.1	AT5G01590.1	AT5G01590.1 | Symbols: | unknown protein;FUNCTIONS IN: molecular_function unknown;INVOLVED IN: biological_process unknown;LOCATED IN: chloroplast, chloroplast envelope;EXPRESSED IN: 22 plant structures;EXPRESSED DURING: 13 growth stages;Has 60 Blast
3	3	3		AT5G01530.1	AT5G01530.1	AT5G01530.1 | Symbols: LHCB4.1 | light harvesting complex photosystem II | chr5:209084-210243 FORWARD LENGTH=290
3	3	3		AT5G01410.1	AT5G01410.1	AT5G01410.1 | Symbols: PDX1, ATPDX1.3, RSR4, PDX1.3, ATPDX1 | Aldolase-type TIM barrel family protein | chr5:172576-173505 REVERSE LENGTH=309
1	3	2		AT5G01400.1	AT5G01400.1	AT5G01400.1 | Symbols: ESP4 | HEAT repeat-containing protein | chr5:162803-171072 REVERSE LENGTH=1467
2	3	3		AT5G01380.1	AT5G01380.1	AT5G01380.1 | Symbols: | Homeodomain-like superfamily protein | chr5:155784-157451 REVERSE LENGTH=323
3	3	3		AT5G01270.1;AT5G01270.2	AT5G01270.1;AT5G01270.2	AT5G01270.1 | Symbols: CPL2, ATCPL2 | carboxyl-terminal domain (ctd) phosphatase-like 2 | chr5:108163-112143 REVERSE LENGTH=770;AT5G01270.2 | Symbols: CPL2 | carboxyl-terminal domain (ctd) phosphatase-like 2 | chr5:107943-112143 REVERSE LENGTH=774
3	3	3		AT5G01210.1	AT5G01210.1	AT5G01210.1 | Symbols: | HXXXD-type acyl-transferase family protein | chr5:84554-85981 FORWARD LENGTH=475
3	3	3		AT5G01160.1	AT5G01160.1	AT5G01160.1 | Symbols: | RING/U-box superfamily protein | chr5:54280-55727 FORWARD LENGTH=360
1	3	3		AT5G01010.1;AT5G01010.2;AT5G01010.3;AT5G01010.4	AT5G01010.1;AT5G01010.2;AT5G01010.3;AT5G01010.4	AT5G01010.1 | Symbols: | CONTAINS InterPro DOMAIN/s: GOLD (InterPro:IPR009038);Has 172 Blast hits to 172 proteins in 43 species: Archae - 0;Bacteria - 0;Metazoa - 95;Fungi - 0;Plants - 63;Viruses - 0;Other Eukaryotes - 14 (source: NCBI BLink). | ch
3	3	3		AT4G39990.1;AT5G47960.1	AT4G39990.1;AT5G47960.1;AT3G12160.1	AT4G39990.1 | Symbols: ATRABA4B, ATRAB11G, ATGB3, RABA4B | RAB GTPase homolog A4B | chr4:18542722-18543779 FORWARD LENGTH=224;AT5G47960.1 | Symbols: SMG1, ATRABA4C, RABA4C | RAB GTPase homolog A4C | chr5:19421533-19422473 REVERSE LENGTH=223
3	3	3		AT4G39980.1	AT4G39980.1	AT4G39980.1 | Symbols: DHS1 | 3-deoxy-D-arabino-heptulosonate 7-phosphate synthase 1 | chr4:18539654-18541832 FORWARD LENGTH=525
0	3	3		AT4G39860.2;AT4G39860.1	AT4G39860.2;AT4G39860.1	AT4G39860.2 | Symbols: | unknown protein;BEST Arabidopsis thaliana protein match is: unknown protein (TAIR:AT2G22270.1);Has 148 Blast hits to 144 proteins in 18 species: Archae - 0;Bacteria - 0;Metazoa - 0;Fungi - 0;Plants - 144;Viruses - 0;Other
2	3	2		AT4G39800.1;AT2G22240.1;AT2G22240.2	AT4G39800.1;AT2G22240.1;AT2G22240.2	AT4G39800.1 | Symbols: MI-1-P SYNTHASE, MIPS1, ATMIPS1, ATIPS1 | myo-inositol-1-phosphate synthase 1 | chr4:18469659-18471893 REVERSE LENGTH=511;AT2G22240.1 | Symbols: ATMIPS2, MIPS2, ATIPS2 | myo-inositol-1-phosphate synthase 2 | chr2:9451901-9453938 REVE
3	3	3		AT4G39710.2;AT4G39710.1	AT4G39710.2;AT4G39710.1	AT4G39710.2 | Symbols: FKBP16-2 | FK506-binding protein 16-2 | chr4:18427447-18428325 REVERSE LENGTH=177;AT4G39710.1 | Symbols: FKBP16-2 | FK506-binding protein 16-2 | chr4:18427249-18428325 REVERSE LENGTH=217
3	3	3		AT4G39680.2;AT4G39680.1	AT4G39680.2;AT4G39680.1	AT4G39680.2 | Symbols: | SAP domain-containing protein | chr4:18414604-18416938 REVERSE LENGTH=633;AT4G39680.1 | Symbols: | SAP domain-containing protein | chr4:18414604-18416938 REVERSE LENGTH=633
3	1	3		AT4G39660.1	AT4G39660.1	AT4G39660.1 | Symbols: AGT2 | alanine:glyoxylate aminotransferase 2 | chr4:18406797-18409262 FORWARD LENGTH=476
3	3	3		AT4G39520.1	AT4G39520.1	AT4G39520.1 | Symbols: | GTP-binding protein-related | chr4:18371329-18374000 REVERSE LENGTH=369
3	3	3		AT4G39460.2;AT4G39460.1	AT4G39460.2;AT4G39460.1	AT4G39460.2 | Symbols: SAMC1 | S-adenosylmethionine carrier 1 | chr4:18356093-18358596 REVERSE LENGTH=325;AT4G39460.1 | Symbols: SAMC1, SAMT1 | S-adenosylmethionine carrier 1 | chr4:18356093-18358596 REVERSE LENGTH=325
3	3	3		AT4G39330.1;AT4G39330.2	AT4G39330.1;AT4G39330.2	AT4G39330.1 | Symbols: ATCAD9, CAD9 | cinnamyl alcohol dehydrogenase 9 | chr4:18291268-18292772 FORWARD LENGTH=360;AT4G39330.2 | Symbols: ATCAD9, CAD9 | cinnamyl alcohol dehydrogenase 9 | chr4:18291268-18292740 FORWARD LENGTH=311
3	3	3		AT4G39260.1;AT4G39260.3;AT4G39260.2;AT4G39260.4	AT4G39260.1;AT4G39260.3;AT4G39260.2;AT4G39260.4	AT4G39260.1 | Symbols: CCR1, ATGRP8, GR-RBP8, GRP8 | cold, circadian rhythm, and RNA binding 1 | chr4:18274166-18274958 REVERSE LENGTH=169;AT4G39260.3 | Symbols: CCR1, ATGRP8, GR-RBP8, GRP8 | cold, circadian rhythm, and RNA binding 1 | chr4:18274166-182749
3	3	3		AT4G39200.2;AT4G39200.1	AT4G39200.2;AT4G39200.1	AT4G39200.2 | Symbols: | Ribosomal protein S25 family protein | chr4:18257464-18258464 FORWARD LENGTH=107;AT4G39200.1 | Symbols: | Ribosomal protein S25 family protein | chr4:18257464-18258464 FORWARD LENGTH=108
0	3	3		AT4G39160.1;AT4G39160.2	AT4G39160.1;AT4G39160.2	AT4G39160.1 | Symbols: | Homeodomain-like superfamily protein | chr4:18236828-18239744 FORWARD LENGTH=601;AT4G39160.2 | Symbols: | Homeodomain-like superfamily protein | chr4:18236828-18240433 FORWARD LENGTH=624
3	3	3		AT4G39100.2;AT4G39100.1	AT4G39100.2;AT4G39100.1	AT4G39100.2 | Symbols: SHL1 | PHD finger family protein / bromo-adjacent homology (BAH) domain-containing protein | chr4:18218712-18220134 REVERSE LENGTH=169;AT4G39100.1 | Symbols: SHL1 | PHD finger family protein / bromo-adjacent homology (BAH) domain-con
3	3	3		AT4G39090.1	AT4G39090.1	AT4G39090.1 | Symbols: RD19, RD19A | Papain family cysteine protease | chr4:18215826-18217326 REVERSE LENGTH=368
3	3	3		AT4G39080.1	AT4G39080.1	AT4G39080.1 | Symbols: VHA-A3 | vacuolar proton ATPase A3 | chr4:18209513-18214752 FORWARD LENGTH=821
3	3	3		AT4G38970.1;AT4G38970.2	AT4G38970.1;AT4G38970.2	AT4G38970.1 | Symbols: FBA2 | fructose-bisphosphate aldolase 2 | chr4:18163714-18165659 REVERSE LENGTH=398;AT4G38970.2 | Symbols: FBA2 | fructose-bisphosphate aldolase 2 | chr4:18163769-18165659 REVERSE LENGTH=381
0	3	2		AT4G38930.1;AT4G38930.2	AT4G38930.1;AT4G38930.2	AT4G38930.1 | Symbols: | Ubiquitin fusion degradation UFD1 family protein | chr4:18149907-18151616 FORWARD LENGTH=311;AT4G38930.2 | Symbols: | Ubiquitin fusion degradation UFD1 family protein | chr4:18149907-18151616 FORWARD LENGTH=315
2	3	3		AT4G38900.3;AT4G38900.2;AT4G38900.1	AT4G38900.3;AT4G38900.2;AT4G38900.1	AT4G38900.3 | Symbols: | Basic-leucine zipper (bZIP) transcription factor family protein | chr4:18139564-18141520 REVERSE LENGTH=547;AT4G38900.2 | Symbols: | Basic-leucine zipper (bZIP) transcription factor family protein | chr4:18139564-18141520 REVERSE
2	3	3		AT4G38890.1	AT4G38890.1	AT4G38890.1 | Symbols: | FMN-linked oxidoreductases superfamily protein | chr4:18135909-18139100 REVERSE LENGTH=691
1	3	3		AT4G38810.2;AT4G38810.1	AT4G38810.2;AT4G38810.1	AT4G38810.2 | Symbols: | Calcium-binding EF-hand family protein | chr4:18115607-18118860 REVERSE LENGTH=375;AT4G38810.1 | Symbols: | Calcium-binding EF-hand family protein | chr4:18115607-18116999 REVERSE LENGTH=265
3	3	3		AT4G38740.1;AT2G21130.1	AT4G38740.1;AT2G21130.1	AT4G38740.1 | Symbols: ROC1 | rotamase CYP 1 | chr4:18083620-18084138 REVERSE LENGTH=172;AT2G21130.1 | Symbols: | Cyclophilin-like peptidyl-prolyl cis-trans isomerase family protein | chr2:9055619-9056143 REVERSE LENGTH=174
1	3	3		AT4G38710.1;AT4G38710.2	AT4G38710.1;AT4G38710.2	AT4G38710.1 | Symbols: | glycine-rich protein | chr4:18078141-18080002 REVERSE LENGTH=452;AT4G38710.2 | Symbols: | glycine-rich protein | chr4:18078141-18080002 REVERSE LENGTH=465
3	3	3		AT4G38680.1	AT4G38680.1	AT4G38680.1 | Symbols: GRP2, CSDP2, CSP2, ATCSP2 | glycine rich protein 2 | chr4:18072240-18072851 REVERSE LENGTH=203
3	3	3		AT4G38630.1	AT4G38630.1	AT4G38630.1 | Symbols: RPN10, MCB1, ATMCB1, MBP1 | regulatory particle non-ATPase 10 | chr4:18057357-18059459 REVERSE LENGTH=386
3	3	3		AT4G38600.1;AT4G38600.2	AT4G38600.1;AT4G38600.2	AT4G38600.1 | Symbols: KAK, UPL3 | HEAT repeat;HECT-domain (ubiquitin-transferase) | chr4:18041503-18049292 REVERSE LENGTH=1888;AT4G38600.2 | Symbols: KAK, UPL3 | HEAT repeat;HECT-domain (ubiquitin-transferase) | chr4:18041503-18049073 REVERSE LENGTH=179
1	3	3		AT4G38550.1	AT4G38550.1	AT4G38550.1 | Symbols: | Arabidopsis phospholipase-like protein (PEARLI 4) family | chr4:18025886-18028546 FORWARD LENGTH=612
3	3	3		AT4G38510.4;AT4G38510.3;AT4G38510.2;AT4G38510.1;AT4G38510.5	AT4G38510.4;AT4G38510.3;AT4G38510.2;AT4G38510.1;AT4G38510.5	AT4G38510.4 | Symbols: | ATPase, V1 complex, subunit B protein | chr4:18011155-18014789 REVERSE LENGTH=487;AT4G38510.3 | Symbols: | ATPase, V1 complex, subunit B protein | chr4:18011155-18014789 REVERSE LENGTH=487;AT4G38510.2 | Symbols: | ATPase, V1 com
1	3	3		AT4G38440.1	AT4G38440.1	AT4G38440.1 | Symbols: | LOCATED IN: chloroplast;EXPRESSED IN: 21 plant structures;EXPRESSED DURING: 12 growth stages;CONTAINS InterPro DOMAIN/s: RNA polymerase II-associated protein 1, C-terminal (InterPro:IPR013929), RNA polymerase II-associated prot
3	3	3		AT4G38130.1;AT4G38130.2	AT4G38130.1;AT4G38130.2	AT4G38130.1 | Symbols: HD1, ATHD1, HDA1, RPD3A, HDA19, ATHDA19 | histone deacetylase 1 | chr4:17896493-17899057 REVERSE LENGTH=501;AT4G38130.2 | Symbols: HD1, ATHD1, HDA1, RPD3A, HDA19 | histone deacetylase 1 | chr4:17896663-17899057 REVERSE LENGTH=469
3	3	3		AT4G37930.1	AT4G37930.1	AT4G37930.1 | Symbols: SHM1, STM, SHMT1 | serine transhydroxymethyltransferase 1 | chr4:17831891-17834742 REVERSE LENGTH=517
3	3	3		AT4G37910.1	AT4G37910.1	AT4G37910.1 | Symbols: mtHsc70-1 | mitochondrial heat shock protein 70-1 | chr4:17825368-17828099 REVERSE LENGTH=682
3	3	3		AT4G37870.1	AT4G37870.1;AT5G65690.1	AT4G37870.1 | Symbols: PCK1, PEPCK | phosphoenolpyruvate carboxykinase 1 | chr4:17802974-17806332 REVERSE LENGTH=671
3	3	3		AT4G37800.1	AT4G37800.1	AT4G37800.1 | Symbols: XTH7 | xyloglucan endotransglucosylase/hydrolase 7 | chr4:17775703-17777372 REVERSE LENGTH=293
3	3	3		AT4G37440.1;AT4G37440.2	AT4G37440.1;AT4G37440.2	AT4G37440.1 | Symbols: | unknown protein;BEST Arabidopsis thaliana protein match is: unknown protein (TAIR:AT3G50040.1);Has 220 Blast hits to 205 proteins in 55 species: Archae - 0;Bacteria - 15;Metazoa - 50;Fungi - 11;Plants - 76;Viruses - 3;Othe
2	3	3		AT4G37300.1	AT4G37300.1	AT4G37300.1 | Symbols: MEE59 | maternal effect embryo arrest 59 | chr4:17554805-17555498 FORWARD LENGTH=173
0	3	3		AT4G37210.1;AT4G37210.2	AT4G37210.1;AT4G37210.2	AT4G37210.1 | Symbols: | Tetratricopeptide repeat (TPR)-like superfamily protein | chr4:17512376-17514421 FORWARD LENGTH=492;AT4G37210.2 | Symbols: | Tetratricopeptide repeat (TPR)-like superfamily protein | chr4:17512376-17514072 FORWARD LENGTH=377
2	3	3		AT4G37120.1	AT4G37120.1;AT3G45950.1	AT4G37120.1 | Symbols: SMP2 | Pre-mRNA splicing Prp18-interacting factor | chr4:17486679-17489123 FORWARD LENGTH=536
0	3	3		AT4G37090.2;AT4G37090.1	AT4G37090.2;AT4G37090.1	AT4G37090.2 | Symbols: | unknown protein;FUNCTIONS IN: molecular_function unknown;INVOLVED IN: biological_process unknown;LOCATED IN: cellular_component unknown;EXPRESSED IN: 23 plant structures;EXPRESSED DURING: 13 growth stages;Has 35333 Blast hit
3	3	3		AT4G37070.2;AT4G37070.4;AT4G37070.3;AT4G37070.1	AT4G37070.2;AT4G37070.4;AT4G37070.3;AT4G37070.1;AT4G37060.1;AT4G37060.2	AT4G37070.2 | Symbols: PLP1, PLA IVA, AtPLAIVA | Acyl transferase/acyl hydrolase/lysophospholipase superfamily protein | chr4:17464916-17467058 REVERSE LENGTH=414;AT4G37070.4 | Symbols: PLP1, PLA IVA, AtPLAIVA | Acyl transferase/acyl hydrolase/lysophosphol
3	3	3		AT4G37000.1	AT4G37000.1	AT4G37000.1 | Symbols: ACD2, ATRCCR | accelerated cell death 2 (ACD2) | chr4:17442627-17443762 FORWARD LENGTH=319
3	3	2		AT4G36980.2;AT4G36980.3;AT4G36980.1;AT4G36980.4	AT4G36980.2;AT4G36980.3;AT4G36980.1;AT4G36980.4	AT4G36980.2 | Symbols: | FUNCTIONS IN: molecular_function unknown;INVOLVED IN: biological_process unknown;EXPRESSED IN: 23 plant structures;EXPRESSED DURING: 13 growth stages;CONTAINS InterPro DOMAIN/s: Splicing factor, suppressor of white apricot (In
3	3	3		AT4G36880.1	AT4G36880.1	AT4G36880.1 | Symbols: CP1 | cysteine proteinase1 | chr4:17374692-17376180 REVERSE LENGTH=376
3	3	3		AT4G36760.1	AT4G36760.1	AT4G36760.1 | Symbols: ATAPP1, APP1 | aminopeptidase P1 | chr4:17326688-17329979 FORWARD LENGTH=645
2	3	3		AT4G36730.2;AT4G36730.1	AT4G36730.2;AT4G36730.1	AT4G36730.2 | Symbols: GBF1 | G-box binding factor 1 | chr4:17309850-17311752 REVERSE LENGTH=313;AT4G36730.1 | Symbols: GBF1 | G-box binding factor 1 | chr4:17309850-17311752 REVERSE LENGTH=315
3	3	3		AT4G36700.1	AT4G36700.1	AT4G36700.1 | Symbols: | RmlC-like cupins superfamily protein | chr4:17298443-17300337 REVERSE LENGTH=522
3	3	3		AT4G36690.4;AT4G36690.1;AT4G36690.2;AT4G36690.3	AT4G36690.4;AT4G36690.1;AT4G36690.2;AT4G36690.3	AT4G36690.4 | Symbols: ATU2AF65A | U2 snRNP auxilliary factor, large subunit, splicing factor | chr4:17294139-17297609 REVERSE LENGTH=551;AT4G36690.1 | Symbols: ATU2AF65A | U2 snRNP auxilliary factor, large subunit, splicing factor | chr4:17294139-17297609
3	3	3		AT4G36630.1	AT4G36630.1	AT4G36630.1 | Symbols: EMB2754 | Vacuolar sorting protein 39 | chr4:17272088-17276524 REVERSE LENGTH=1000
1	3	3		AT4G36470.1	AT4G36470.1	AT4G36470.1 | Symbols: | S-adenosyl-L-methionine-dependent methyltransferases superfamily protein | chr4:17215128-17216475 REVERSE LENGTH=371
3	3	3		AT4G36250.1	AT4G36250.1	AT4G36250.1 | Symbols: ALDH3F1 | aldehyde dehydrogenase 3F1 | chr4:17151029-17153381 FORWARD LENGTH=484
3	3	3		AT4G36220.1	AT4G36220.1	AT4G36220.1 | Symbols: FAH1, CYP84A1 | ferulic acid 5-hydroxylase 1 | chr4:17137584-17139619 REVERSE LENGTH=520
3	3	3		AT4G36130.1	AT4G36130.1;AT3G51190.1	AT4G36130.1 | Symbols: | Ribosomal protein L2 family | chr4:17097613-17098656 FORWARD LENGTH=258
0	3	0		AT4G36090.3;AT4G36090.1	AT4G36090.3;AT4G36090.1;AT4G36090.2	AT4G36090.3 | Symbols: | oxidoreductase, 2OG-Fe(II) oxygenase family protein | chr4:17078376-17080670 REVERSE LENGTH=520;AT4G36090.1 | Symbols: | oxidoreductase, 2OG-Fe(II) oxygenase family protein | chr4:17079042-17080670 REVERSE LENGTH=385
3	3	3		AT4G36020.1	AT4G36020.1	AT4G36020.1 | Symbols: CSDP1 | cold shock domain protein 1 | chr4:17043443-17044342 REVERSE LENGTH=299
0	3	1		AT4G35980.1	AT4G35980.1	AT4G35980.1 | Symbols: | unknown protein;FUNCTIONS IN: molecular_function unknown;INVOLVED IN: biological_process unknown;LOCATED IN: cellular_component unknown;EXPRESSED IN: 24 plant structures;EXPRESSED DURING: 15 growth stages;Has 30201 Blast hit
3	3	3		AT4G35860.1;AT4G35860.2	AT4G35860.1;AT4G35860.2;AT4G17160.1	AT4G35860.1 | Symbols: ATRABB1B, ATGB2, ATRAB2C, GB2 | GTP-binding 2 | chr4:16987118-16988839 REVERSE LENGTH=211;AT4G35860.2 | Symbols: ATRABB1B, ATGB2, ATRAB2C, GB2 | GTP-binding 2 | chr4:16987118-16988587 REVERSE LENGTH=165
3	3	3		AT4G35830.1;AT4G35830.2	AT4G35830.1;AT4G35830.2	AT4G35830.1 | Symbols: ACO1 | aconitase 1 | chr4:16973007-16977949 REVERSE LENGTH=898;AT4G35830.2 | Symbols: ACO1 | aconitase 1 | chr4:16973007-16977278 REVERSE LENGTH=795
3	3	3		AT4G35800.1	AT4G35800.1	AT4G35800.1 | Symbols: NRPB1, RPB1, RNA_POL_II_LSRNA_POL_II_LS, RNA_POL_II_LS | RNA polymerase II large subunit | chr4:16961115-16967892 REVERSE LENGTH=1839
3	2	3		AT4G35790.2;AT4G35790.1;AT4G35790.3	AT4G35790.2;AT4G35790.1;AT4G35790.3	AT4G35790.2 | Symbols: ATPLDDELTA, PLDDELTA | phospholipase D delta | chr4:16955774-16959875 REVERSE LENGTH=857;AT4G35790.1 | Symbols: ATPLDDELTA, PLDDELTA | phospholipase D delta | chr4:16955774-16959875 REVERSE LENGTH=868;AT4G35790.3 | Symbols: ATPLDDELT
3	3	3		AT4G35785.3;AT4G35785.2;AT4G35785.4;AT4G35785.1;AT4G35785.5	AT4G35785.3;AT4G35785.2;AT4G35785.4;AT4G35785.1;AT4G35785.5	AT4G35785.3 | Symbols: | RNA-binding (RRM/RBD/RNP motifs) family protein | chr4:16953708-16955127 REVERSE LENGTH=207;AT4G35785.2 | Symbols: | RNA-binding (RRM/RBD/RNP motifs) family protein | chr4:16953211-16955127 REVERSE LENGTH=239;AT4G35785.4 | Symbol
3	3	3		AT4G35780.1	AT4G35780.1	AT4G35780.1 | Symbols: | ACT-like protein tyrosine kinase family protein | chr4:16946729-16950405 REVERSE LENGTH=570
3	3	3		AT4G35770.2;AT4G35770.3;AT4G35770.1	AT4G35770.2;AT4G35770.3;AT4G35770.1	AT4G35770.2 | Symbols: SEN1, ATSEN1, DIN1 | Rhodanese/Cell cycle control phosphatase superfamily protein | chr4:16945073-16945840 FORWARD LENGTH=161;AT4G35770.3 | Symbols: SEN1, ATSEN1, DIN1 | Rhodanese/Cell cycle control phosphatase superfamily protein |
3	3	3		AT4G35630.1	AT4G35630.1	AT4G35630.1 | Symbols: PSAT | phosphoserine aminotransferase | chr4:16904205-16905497 FORWARD LENGTH=430
3	3	3		AT4G35450.3;AT4G35450.2;AT4G35450.1;AT4G35450.5;AT4G35450.4	AT4G35450.3;AT4G35450.2;AT4G35450.1;AT4G35450.5;AT4G35450.4	AT4G35450.3 | Symbols: AKR2, AFT, AKR2A | ankyrin repeat-containing protein 2 | chr4:16839862-16841759 FORWARD LENGTH=342;AT4G35450.2 | Symbols: AKR2, AFT, AKR2A | ankyrin repeat-containing protein 2 | chr4:16839862-16841759 FORWARD LENGTH=342;AT4G35450.1
3	3	3		AT4G35360.1	AT4G35360.1;AT2G17320.1;AT2G17340.1	AT4G35360.1 | Symbols: | Uncharacterised conserved protein (UCP030210) | chr4:16812303-16814656 REVERSE LENGTH=367
3	3	3		AT4G35250.1	AT4G35250.1	AT4G35250.1 | Symbols: | NAD(P)-binding Rossmann-fold superfamily protein | chr4:16771401-16773269 REVERSE LENGTH=395
3	3	3		AT4G35230.1	AT4G35230.1	AT4G35230.1 | Symbols: BSK1 | BR-signaling kinase 1 | chr4:16755325-16758041 REVERSE LENGTH=512
3	3	3		AT4G35100.2;AT4G35100.1	AT4G35100.2;AT4G35100.1	AT4G35100.2 | Symbols: PIP3 | plasma membrane intrinsic protein 3 | chr4:16708672-16709958 FORWARD LENGTH=280;AT4G35100.1 | Symbols: PIP3, PIP3A, PIP2;7, SIMIP | plasma membrane intrinsic protein 3 | chr4:16708672-16709958 FORWARD LENGTH=280
3	3	3		AT4G35090.1;AT4G35090.2	AT4G35090.1;AT4G35090.2	AT4G35090.1 | Symbols: CAT2 | catalase 2 | chr4:16700937-16703215 REVERSE LENGTH=492;AT4G35090.2 | Symbols: CAT2 | catalase 2 | chr4:16701105-16703215 REVERSE LENGTH=474
3	3	3		AT4G35060.1	AT4G35060.1	AT4G35060.1 | Symbols: HIPP25 | Heavy metal transport/detoxification superfamily protein | chr4:16685874-16686419 REVERSE LENGTH=153
3	3	3		AT4G35000.1	AT4G35000.1	AT4G35000.1 | Symbols: APX3 | ascorbate peroxidase 3 | chr4:16665007-16667541 REVERSE LENGTH=287
3	3	3		AT4G34870.1	AT4G34870.1	AT4G34870.1 | Symbols: ROC5, ATCYP1 | rotamase cyclophilin 5 | chr4:16614451-16614969 FORWARD LENGTH=172
3	3	3		AT4G34830.1	AT4G34830.1	AT4G34830.1 | Symbols: MRL1 | Pentatricopeptide repeat (PPR) superfamily protein | chr4:16599976-16605994 REVERSE LENGTH=1089
3	3	3		AT4G34740.1	AT4G34740.1;AT2G16570.1;AT4G38880.1	AT4G34740.1 | Symbols: ATASE2, CIA1, ATPURF2, ASE2 | GLN phosphoribosyl pyrophosphate amidotransferase 2 | chr4:16574894-16576579 REVERSE LENGTH=561
3	3	3		AT4G34670.1	AT4G34670.1	AT4G34670.1 | Symbols: | Ribosomal protein S3Ae | chr4:16548724-16550222 FORWARD LENGTH=262
3	3	3		AT4G34660.1;AT4G34660.3;AT4G34660.2	AT4G34660.1;AT4G34660.3;AT4G34660.2	AT4G34660.1 | Symbols: | SH3 domain-containing protein | chr4:16545595-16548294 REVERSE LENGTH=368;AT4G34660.3 | Symbols: | SH3 domain-containing protein | chr4:16545595-16548294 REVERSE LENGTH=317;AT4G34660.2 | Symbols: | SH3 domain-containing protein
3	3	3		AT4G34620.1	AT4G34620.1	AT4G34620.1 | Symbols: SSR16 | small subunit ribosomal protein 16 | chr4:16535084-16536092 REVERSE LENGTH=113
3	3	3		AT4G34490.1	AT4G34490.1	AT4G34490.1 | Symbols: ATCAP1, CAP 1, CAP1 | cyclase associated protein 1 | chr4:16484896-16487355 REVERSE LENGTH=476
3	3	3		AT4G34450.1	AT4G34450.1	AT4G34450.1 | Symbols: | coatomer gamma-2 subunit, putative / gamma-2 coat protein, putative / gamma-2 COP, putative | chr4:16471956-16476795 FORWARD LENGTH=886
2	3	3		AT4G34430.3;AT4G34430.2;AT4G34430.1;AT4G34430.4	AT4G34430.3;AT4G34430.2;AT4G34430.1;AT4G34430.4	AT4G34430.3 | Symbols: CHB3, ATSWI3D | DNA-binding family protein | chr4:16461069-16464993 FORWARD LENGTH=983;AT4G34430.2 | Symbols: CHB3, ATSWI3D | DNA-binding family protein | chr4:16461069-16464993 FORWARD LENGTH=985;AT4G34430.1 | Symbols: CHB3, ATSWI3D
2	3	3		AT4G34270.1	AT4G34270.1	AT4G34270.1 | Symbols: | TIP41-like family protein | chr4:16404138-16406153 REVERSE LENGTH=290
3	3	2		AT4G34230.1;AT4G34230.2	AT4G34230.1;AT4G34230.2	AT4G34230.1 | Symbols: CAD5, ATCAD5, CAD-5 | cinnamyl alcohol dehydrogenase 5 | chr4:16386898-16388666 REVERSE LENGTH=357;AT4G34230.2 | Symbols: CAD5, CAD-5 | cinnamyl alcohol dehydrogenase 5 | chr4:16386898-16388666 REVERSE LENGTH=357
3	3	3		AT4G34200.1	AT4G34200.1;AT1G17745.1;AT1G17745.2	AT4G34200.1 | Symbols: EDA9 | D-3-phosphoglycerate dehydrogenase | chr4:16374041-16376561 REVERSE LENGTH=603
3	3	3		AT4G34110.1	AT4G34110.1	AT4G34110.1 | Symbols: PAB2, PABP2, ATPAB2 | poly(A) binding protein 2 | chr4:16336732-16339892 FORWARD LENGTH=629
3	3	3		AT4G34090.1;AT4G34090.2;AT4G34090.3	AT4G34090.1;AT4G34090.2;AT4G34090.3	AT4G34090.1 | Symbols: | unknown protein;FUNCTIONS IN: molecular_function unknown;INVOLVED IN: biological_process unknown;LOCATED IN: chloroplast, chloroplast stroma;EXPRESSED IN: 22 plant structures;EXPRESSED DURING: 13 growth stages;BEST Arabidops
3	3	3		AT4G34050.1	AT4G34050.1;AT4G34050.2	AT4G34050.1 | Symbols: CCoAOMT1 | S-adenosyl-L-methionine-dependent methyltransferases superfamily protein | chr4:16310844-16311973 FORWARD LENGTH=259
1	3	3		AT4G33945.1	AT4G33945.1	AT4G33945.1 | Symbols: | ARM repeat superfamily protein | chr4:16268119-16270514 FORWARD LENGTH=464
3	3	3		AT4G33865.1;AT3G44010.1;AT3G43980.1	AT4G33865.1;AT3G44010.1;AT3G43980.1	AT4G33865.1 | Symbols: | Ribosomal protein S14p/S29e family protein | chr4:16233395-16234114 REVERSE LENGTH=56;AT3G44010.1 | Symbols: | Ribosomal protein S14p/S29e family protein | chr3:15800175-15801132 REVERSE LENGTH=56;AT3G43980.1 | Symbols: | Riboso
3	3	3		AT4G33760.1	AT4G33760.1	AT4G33760.1 | Symbols: | tRNA synthetase class II (D, K and N) family protein | chr4:16189285-16193260 REVERSE LENGTH=664
3	3	3		AT4G33650.1;AT4G33650.2	AT4G33650.1;AT4G33650.2	AT4G33650.1 | Symbols: ADL2, DRP3A | dynamin-related protein 3A | chr4:16161073-16166587 FORWARD LENGTH=808;AT4G33650.2 | Symbols: DRP3A | dynamin-related protein 3A | chr4:16161073-16166587 FORWARD LENGTH=809
3	3	3		AT4G33580.1;AT4G33580.2	AT4G33580.1;AT4G33580.2	AT4G33580.1 | Symbols: ATBCA5, BCA5 | beta carbonic anhydrase 5 | chr4:16139406-16141363 FORWARD LENGTH=301;AT4G33580.2 | Symbols: ATBCA5, BCA5 | beta carbonic anhydrase 5 | chr4:16139406-16141363 FORWARD LENGTH=302
3	3	3		AT4G33510.1;AT4G33510.2	AT4G33510.1;AT4G33510.2	AT4G33510.1 | Symbols: DHS2 | 3-deoxy-d-arabino-heptulosonate 7-phosphate synthase | chr4:16116496-16118549 FORWARD LENGTH=507;AT4G33510.2 | Symbols: DHS2 | 3-deoxy-d-arabino-heptulosonate 7-phosphate synthase | chr4:16116496-16118233 FORWARD LENGTH=432
3	3	2		AT4G33360.1;AT4G33360.2;AT4G33360.3	AT4G33360.1;AT4G33360.2;AT4G33360.3	AT4G33360.1 | Symbols: FLDH | NAD(P)-binding Rossmann-fold superfamily protein | chr4:16067989-16069374 REVERSE LENGTH=344;AT4G33360.2 | Symbols: FLDH | NAD(P)-binding Rossmann-fold superfamily protein | chr4:16068123-16069374 REVERSE LENGTH=305;AT4G33360.
3	3	3		AT4G33350.1;AT4G33350.2	AT4G33350.1;AT4G33350.2	AT4G33350.1 | Symbols: | Tic22-like family protein | chr4:16064638-16066715 REVERSE LENGTH=268;AT4G33350.2 | Symbols: | Tic22-like family protein | chr4:16064638-16066715 REVERSE LENGTH=242
3	3	3		AT4G33250.1	AT4G33250.1	AT4G33250.1 | Symbols: EIF3K, TIF3K1, ATTIF3K1 | eukaryotic translation initiation factor 3K | chr4:16039066-16040617 REVERSE LENGTH=226
3	3	3		AT4G33090.1	AT4G33090.1	AT4G33090.1 | Symbols: APM1, ATAPM1 | aminopeptidase M1 | chr4:15965915-15970418 REVERSE LENGTH=879
0	3	3		AT4G33060.1	AT4G33060.1	AT4G33060.1 | Symbols: | Cyclophilin-like peptidyl-prolyl cis-trans isomerase family protein | chr4:15948535-15951954 FORWARD LENGTH=504
3	3	3		AT4G33010.1;AT4G33010.2	AT4G33010.1;AT4G33010.2	AT4G33010.1 | Symbols: AtGLDP1, GLDP1 | glycine decarboxylase P-protein 1 | chr4:15926852-15931150 REVERSE LENGTH=1037;AT4G33010.2 | Symbols: AtGLDP1, GLDP1 | glycine decarboxylase P-protein 1 | chr4:15927133-15931150 REVERSE LENGTH=976
0	3	2		AT4G32960.1	AT4G32960.1	AT4G32960.1 | Symbols: | unknown protein;BEST Arabidopsis thaliana protein match is: unknown protein (TAIR:AT4G32970.1);Has 106 Blast hits to 106 proteins in 39 species: Archae - 0;Bacteria - 0;Metazoa - 62;Fungi - 0;Plants - 37;Viruses - 0;Other
2	3	2		AT4G32850.7;AT4G32850.4;AT4G32850.3;AT4G32850.6;AT4G32850.2;AT4G32850.1;AT4G32850.9;AT4G32850.5;AT4G32850.10;AT4G32850.8	AT4G32850.7;AT4G32850.4;AT4G32850.3;AT4G32850.6;AT4G32850.2;AT4G32850.1;AT4G32850.9;AT4G32850.5;AT4G32850.10;AT4G32850.8;AT2G25850.3;AT2G25850.1;AT2G25850.4;AT2G25850.2	AT4G32850.7 | Symbols: nPAP | nuclear poly(a) polymerase | chr4:15850134-15853906 FORWARD LENGTH=716;AT4G32850.4 | Symbols: nPAP | nuclear poly(a) polymerase | chr4:15850134-15853810 FORWARD LENGTH=730;AT4G32850.3 | Symbols: nPAP | nuclear poly(a) polymera
0	3	2		AT4G32760.1;AT4G32760.2	AT4G32760.1;AT4G32760.2	AT4G32760.1 | Symbols: | ENTH/VHS/GAT family protein | chr4:15799376-15803832 FORWARD LENGTH=675;AT4G32760.2 | Symbols: | ENTH/VHS/GAT family protein | chr4:15799376-15803832 FORWARD LENGTH=676
3	3	3		AT4G32720.2;AT4G32720.1	AT4G32720.2;AT4G32720.1	AT4G32720.2 | Symbols: AtLa1, La1 | La protein 1 | chr4:15787313-15789498 FORWARD LENGTH=404;AT4G32720.1 | Symbols: AtLa1, La1 | La protein 1 | chr4:15787313-15789683 FORWARD LENGTH=433
0	3	3		AT4G32690.1	AT4G32690.1	AT4G32690.1 | Symbols: GLB3, ATGLB3 | hemoglobin 3 | chr4:15765486-15766862 FORWARD LENGTH=175
2	3	3		AT4G32620.1;AT4G32620.2	AT4G32620.1;AT4G32620.2	AT4G32620.1 | Symbols: | Enhancer of polycomb-like transcription factor protein | chr4:15731968-15737222 FORWARD LENGTH=1539;AT4G32620.2 | Symbols: | Enhancer of polycomb-like transcription factor protein | chr4:15731968-15737222 FORWARD LENGTH=1540
0	3	2		AT4G32570.1	AT4G32570.1	AT4G32570.1 | Symbols: TIFY8 | TIFY domain protein 8 | chr4:15716433-15718702 REVERSE LENGTH=361
3	3	3		AT4G32551.1;AT4G32551.2	AT4G32551.1;AT4G32551.2	AT4G32551.1 | Symbols: LUG, RON2 | LisH dimerisation motif;WD40/YVTN repeat-like-containing domain | chr4:15707863-15713359 FORWARD LENGTH=931;AT4G32551.2 | Symbols: LUG | LisH dimerisation motif;WD40/YVTN repeat-like-containing domain | chr4:15707863-1571
3	3	3		AT4G32460.2;AT4G32460.1	AT4G32460.2;AT4G32460.1	AT4G32460.2 | Symbols: | Protein of unknown function, DUF642 | chr4:15663036-15664859 REVERSE LENGTH=365;AT4G32460.1 | Symbols: | Protein of unknown function, DUF642 | chr4:15663036-15664859 REVERSE LENGTH=365
3	3	3		AT4G32420.3;AT4G32420.1;AT4G32420.4;AT4G32420.2	AT4G32420.3;AT4G32420.1;AT4G32420.4;AT4G32420.2	AT4G32420.3 | Symbols: | Cyclophilin-like peptidyl-prolyl cis-trans isomerase family protein | chr4:15647550-15652103 REVERSE LENGTH=837;AT4G32420.1 | Symbols: | Cyclophilin-like peptidyl-prolyl cis-trans isomerase family protein | chr4:15647550-15652103
3	3	3		AT4G32410.1;AT2G25540.1	AT4G32410.1;AT2G25540.1	AT4G32410.1 | Symbols: CESA1, RSW1, AtCESA1 | cellulose synthase 1 | chr4:15641009-15646388 REVERSE LENGTH=1081;AT2G25540.1 | Symbols: CESA10 | cellulose synthase 10 | chr2:10867070-10872077 REVERSE LENGTH=1065
3	3	3		AT4G32330.2;AT4G32330.3;AT4G32330.1	AT4G32330.2;AT4G32330.3;AT4G32330.1	AT4G32330.2 | Symbols: | TPX2 (targeting protein for Xklp2) protein family | chr4:15609801-15611867 FORWARD LENGTH=436;AT4G32330.3 | Symbols: | TPX2 (targeting protein for Xklp2) protein family | chr4:15609801-15611867 FORWARD LENGTH=437;AT4G32330.1 | Sy
3	3	3		AT4G32285.2;AT4G32285.1	AT4G32285.2;AT4G32285.1	AT4G32285.2 | Symbols: | ENTH/ANTH/VHS superfamily protein | chr4:15586003-15587910 FORWARD LENGTH=635;AT4G32285.1 | Symbols: | ENTH/ANTH/VHS superfamily protein | chr4:15586003-15587910 FORWARD LENGTH=635
3	3	3		AT4G32260.1	AT4G32260.1	AT4G32260.1 | Symbols: | ATPase, F0 complex, subunit B/B, bacterial/chloroplast | chr4:15573859-15574586 REVERSE LENGTH=219
2	3	3		AT4G32200.1	AT4G32200.1	AT4G32200.1 | Symbols: ASY2 | DNA-binding HORMA family protein | chr4:15548840-15554962 FORWARD LENGTH=1399
3	3	3		AT4G32180.1;AT4G32180.3;AT4G32180.2	AT4G32180.1;AT4G32180.3;AT4G32180.2	AT4G32180.1 | Symbols: ATPANK2, PANK2 | pantothenate kinase 2 | chr4:15537724-15543715 REVERSE LENGTH=901;AT4G32180.3 | Symbols: ATPANK2, PANK2 | pantothenate kinase 2 | chr4:15538340-15543715 REVERSE LENGTH=783;AT4G32180.2 | Symbols: ATPANK2, PANK2 | pant
3	3	3		AT4G32150.1	AT4G32150.1;AT2G25340.1;AT5G16000.1	AT4G32150.1 | Symbols: VAMP711, ATVAMP711 | vesicle-associated membrane protein 711 | chr4:15526407-15527651 REVERSE LENGTH=219
3	3	2		AT4G32070.1	AT4G32070.1	AT4G32070.1 | Symbols: Phox4 | Octicosapeptide/Phox/Bem1p (PB1) domain-containing protein / tetratricopeptide repeat (TPR)-containing protein | chr4:15504662-15507097 REVERSE LENGTH=811
3	3	2		AT4G32040.1	AT4G32040.1	AT4G32040.1 | Symbols: KNAT5 | KNOTTED1-like homeobox gene 5 | chr4:15494127-15496009 FORWARD LENGTH=383
3	3	3		AT4G31990.4;AT4G31990.2;AT4G31990.1;AT4G31990.3	AT4G31990.4;AT4G31990.2;AT4G31990.1;AT4G31990.3	AT4G31990.4 | Symbols: ASP5 | aspartate aminotransferase 5 | chr4:15471074-15473521 REVERSE LENGTH=448;AT4G31990.2 | Symbols: ASP5, AAT3, ATAAT1 | aspartate aminotransferase 5 | chr4:15471074-15473521 REVERSE LENGTH=453;AT4G31990.1 | Symbols: ASP5, AAT3, A
3	3	3		AT4G31880.1;AT4G31880.2	AT4G31880.1;AT4G31880.2	AT4G31880.1 | Symbols: | LOCATED IN: cytosol, chloroplast;EXPRESSED IN: 24 plant structures;EXPRESSED DURING: 14 growth stages;BEST Arabidopsis thaliana protein match is: Tudor/PWWP/MBT superfamily protein (TAIR:AT1G15940.1);Has 137162 Blast hits to 7
0	3	0		AT4G31800.2;AT4G31800.1	AT4G31800.2;AT4G31800.1;AT2G25000.1	AT4G31800.2 | Symbols: WRKY18 | WRKY DNA-binding protein 18 | chr4:15383296-15384812 FORWARD LENGTH=309;AT4G31800.1 | Symbols: WRKY18, ATWRKY18 | WRKY DNA-binding protein 18 | chr4:15383296-15384812 FORWARD LENGTH=310
2	3	3		AT4G31750.1	AT4G31750.1	AT4G31750.1 | Symbols: WIN2 | HOPW1-1-interacting 2 | chr4:15364657-15367207 REVERSE LENGTH=311
3	3	3		AT4G31700.1;AT4G31700.2	AT4G31700.1;AT4G31700.2	AT4G31700.1 | Symbols: RPS6, RPS6A | ribosomal protein S6 | chr4:15346306-15347714 REVERSE LENGTH=250;AT4G31700.2 | Symbols: RPS6, RPS6A | ribosomal protein S6 | chr4:15346306-15347075 REVERSE LENGTH=188
3	3	3		AT4G31580.2;AT4G31580.1	AT4G31580.2;AT4G31580.1	AT4G31580.2 | Symbols: SRZ-22, SRZ22, RSZP22, RSZ22, At-RSZ22 | serine/arginine-rich 22 | chr4:15306983-15308064 FORWARD LENGTH=200;AT4G31580.1 | Symbols: SRZ-22, SRZ22, RSZP22, RSZ22, At-RSZ22 | serine/arginine-rich 22 | chr4:15306983-15308064 FORWARD LEN
3	3	3		AT4G31490.1	AT4G31490.1	AT4G31490.1 | Symbols: | Coatomer, beta subunit | chr4:15269460-15272693 FORWARD LENGTH=948
2	3	3		AT4G31430.2;AT4G31430.3;AT4G31430.1	AT4G31430.2;AT4G31430.3;AT4G31430.1	AT4G31430.2 | Symbols: | unknown protein;LOCATED IN: plasma membrane;EXPRESSED IN: 25 plant structures;EXPRESSED DURING: 15 growth stages;Has 35333 Blast hits to 34131 proteins in 2444 species: Archae - 798;Bacteria - 22429;Metazoa - 974;Fungi - 99
0	3	1		AT4G31420.1;AT4G31420.2	AT4G31420.1;AT4G31420.2	AT4G31420.1 | Symbols: | Zinc finger protein 622 | chr4:15245987-15247763 REVERSE LENGTH=404;AT4G31420.2 | Symbols: | Zinc finger protein 622 | chr4:15245987-15247763 REVERSE LENGTH=405
3	3	3		AT4G31300.3;AT4G31300.1;AT4G31300.2	AT4G31300.3;AT4G31300.1;AT4G31300.2	AT4G31300.3 | Symbols: PBA1 | N-terminal nucleophile aminohydrolases (Ntn hydrolases) superfamily protein | chr4:15188927-15190935 FORWARD LENGTH=233;AT4G31300.1 | Symbols: PBA1 | N-terminal nucleophile aminohydrolases (Ntn hydrolases) superfamily protein
3	3	3		AT4G31210.1	AT4G31210.1	AT4G31210.1 | Symbols: | DNA topoisomerase, type IA, core | chr4:15165280-15172534 FORWARD LENGTH=1284
3	3	3		AT4G31200.3;AT4G31200.2;AT4G31200.1	AT4G31200.3;AT4G31200.2;AT4G31200.1	AT4G31200.3 | Symbols: | SWAP (Suppressor-of-White-APricot)/surp RNA-binding domain-containing protein | chr4:15162323-15164568 REVERSE LENGTH=650;AT4G31200.2 | Symbols: | SWAP (Suppressor-of-White-APricot)/surp RNA-binding domain-containing protein | ch
3	3	3		AT4G31180.2;AT4G31180.1	AT4G31180.2;AT4G31180.1	AT4G31180.2 | Symbols: | Class II aminoacyl-tRNA and biotin synthetases superfamily protein | chr4:15156696-15159362 FORWARD LENGTH=558;AT4G31180.1 | Symbols: | Class II aminoacyl-tRNA and biotin synthetases superfamily protein | chr4:15156696-15159362 F
3	3	3		AT4G31160.1	AT4G31160.1	AT4G31160.1 | Symbols: DCAF1 | DDB1-CUL4 associated factor 1 | chr4:15145936-15152939 FORWARD LENGTH=1883
3	3	3		AT4G31120.1;AT4G31120.2	AT4G31120.1;AT4G31120.2	AT4G31120.1 | Symbols: SKB1, ATPRMT5 | SHK1 binding protein 1 | chr4:15132185-15136568 REVERSE LENGTH=642;AT4G31120.2 | Symbols: PRMT5 | SHK1 binding protein 1 | chr4:15132538-15136568 REVERSE LENGTH=584
3	3	3		AT4G30990.1;AT4G30990.2	AT4G30990.1;AT4G30990.2	AT4G30990.1 | Symbols: | ARM repeat superfamily protein | chr4:15084456-15097860 FORWARD LENGTH=2599;AT4G30990.2 | Symbols: | ARM repeat superfamily protein | chr4:15084456-15097860 FORWARD LENGTH=2620
3	3	3		AT4G30950.1	AT4G30950.1	AT4G30950.1 | Symbols: FAD6, FADC, SFD4 | fatty acid desaturase 6 | chr4:15057278-15059673 REVERSE LENGTH=448
3	3	3		AT4G30890.3;AT4G30890.2;AT4G30890.1	AT4G30890.3;AT4G30890.2;AT4G30890.1	AT4G30890.3 | Symbols: UBP24 | ubiquitin-specific protease 24 | chr4:15036383-15038825 REVERSE LENGTH=551;AT4G30890.2 | Symbols: UBP24 | ubiquitin-specific protease 24 | chr4:15036383-15038825 REVERSE LENGTH=551;AT4G30890.1 | Symbols: UBP24 | ubiquitin-spe
3	3	3		AT4G30800.1	AT4G30800.1	AT4G30800.1 | Symbols: | Nucleic acid-binding, OB-fold-like protein | chr4:15001216-15002392 FORWARD LENGTH=159
3	3	3		AT4G30780.1	AT4G30780.1	AT4G30780.1 | Symbols: | unknown protein;BEST Arabidopsis thaliana protein match is: unknown protein (TAIR:AT2G24100.1);Has 109 Blast hits to 109 proteins in 18 species: Archae - 0;Bacteria - 0;Metazoa - 1;Fungi - 0;Plants - 95;Viruses - 0;Other E
2	3	2		AT4G30600.1	AT4G30600.1	AT4G30600.1 | Symbols: | signal recognition particle receptor alpha subunit family protein | chr4:14938142-14940600 REVERSE LENGTH=634
3	2	2		AT4G30530.1	AT4G30530.1;AT4G30550.1	AT4G30530.1 | Symbols: | Class I glutamine amidotransferase-like superfamily protein | chr4:14920605-14922286 FORWARD LENGTH=250
0	3	2		AT4G30390.1	AT4G30390.1	AT4G30390.1 | Symbols: | unknown protein;Has 22 Blast hits to 22 proteins in 11 species: Archae - 0;Bacteria - 0;Metazoa - 0;Fungi - 0;Plants - 22;Viruses - 0;Other Eukaryotes - 0 (source: NCBI BLink). | chr4:14862224-14862906 REVERSE LENGTH=95
0	3	3		AT4G30330.1	AT4G30330.1	AT4G30330.1 | Symbols: | Small nuclear ribonucleoprotein family protein | chr4:14836773-14837919 REVERSE LENGTH=88
3	3	3		AT4G30270.1	AT4G30270.1;AT5G48070.1;AT2G18800.1	AT4G30270.1 | Symbols: MERI5B, MERI-5, XTH24, SEN4 | xyloglucan endotransglucosylase/hydrolase 24 | chr4:14819445-14820448 REVERSE LENGTH=269
3	3	3		AT4G30190.1;AT4G30190.2	AT4G30190.1;AT4G30190.2;AT2G07560.1;AT3G42640.1;AT2G24520.1;AT1G17260.1;AT3G60330.2;AT3G60330.1	AT4G30190.1 | Symbols: AHA2, PMA2, HA2 | H(+)-ATPase 2 | chr4:14770820-14775920 REVERSE LENGTH=948;AT4G30190.2 | Symbols: HA2 | H(+)-ATPase 2 | chr4:14770820-14775920 REVERSE LENGTH=981
3	3	3		AT4G30160.1;AT4G30160.2	AT4G30160.1;AT4G30160.2	AT4G30160.1 | Symbols: VLN4, ATVLN4 | villin 4 | chr4:14754528-14759511 FORWARD LENGTH=974;AT4G30160.2 | Symbols: VLN4 | villin 4 | chr4:14754528-14759511 FORWARD LENGTH=983
2	3	3		AT4G30100.1	AT4G30100.1	AT4G30100.1 | Symbols: | P-loop containing nucleoside triphosphate hydrolases superfamily protein | chr4:14714191-14719335 FORWARD LENGTH=1311
3	3	3		AT4G30010.1	AT4G30010.1	AT4G30010.1 | Symbols: | unknown protein;FUNCTIONS IN: molecular_function unknown;INVOLVED IN: biological_process unknown;LOCATED IN: mitochondrion, plastid;EXPRESSED IN: 26 plant structures;EXPRESSED DURING: 15 growth stages;Has 39 Blast hits to 39
3	3	3		AT4G29900.1	AT4G29900.1	AT4G29900.1 | Symbols: ACA10, CIF1, ATACA10 | autoinhibited Ca(2+)-ATPase 10 | chr4:14611225-14618775 REVERSE LENGTH=1069
3	3	3		AT4G29840.1	AT4G29840.1;AT1G72810.1	AT4G29840.1 | Symbols: MTO2, TS | Pyridoxal-5-phosphate-dependent enzyme family protein | chr4:14599434-14601014 REVERSE LENGTH=526
1	3	3		AT4G29830.1	AT4G29830.1	AT4G29830.1 | Symbols: VIP3 | Transducin/WD40 repeat-like superfamily protein | chr4:14597728-14599157 FORWARD LENGTH=321
3	3	3		AT4G29810.1;AT4G29810.3;AT4G29810.2	AT4G29810.1;AT4G29810.3;AT4G29810.2;AT4G26070.1;AT4G26070.3;AT4G26070.2	AT4G29810.1 | Symbols: ATMKK2, MKK2, MK1 | MAP kinase kinase 2 | chr4:14593299-14595241 REVERSE LENGTH=363;AT4G29810.3 | Symbols: ATMKK2, MKK2, MK1 | MAP kinase kinase 2 | chr4:14593479-14595241 REVERSE LENGTH=338;AT4G29810.2 | Symbols: ATMKK2, MKK2, MK1 |
1	3	2		AT4G29720.1	AT4G29720.1	AT4G29720.1 | Symbols: ATPAO5, PAO5 | polyamine oxidase 5 | chr4:14553456-14555057 REVERSE LENGTH=533
3	3	3		AT4G29510.1	AT4G29510.1	AT4G29510.1 | Symbols: ATPRMT11, PRMT11, ATPRMT1B, PRMT1B | arginine methyltransferase 11 | chr4:14491739-14493752 FORWARD LENGTH=390
0	3	2		AT4G29440.1;AT4G29440.2	AT4G29440.1;AT4G29440.2	AT4G29440.1 | Symbols: | Regulator of Vps4 activity in the MVB pathway protein | chr4:14473942-14477721 REVERSE LENGTH=1090;AT4G29440.2 | Symbols: | Regulator of Vps4 activity in the MVB pathway protein | chr4:14473942-14477683 REVERSE LENGTH=1062
3	3	3		AT4G29410.2;AT4G29410.1	AT4G29410.2;AT4G29410.1	AT4G29410.2 | Symbols: | Ribosomal L28e protein family | chr4:14468439-14469964 REVERSE LENGTH=143;AT4G29410.1 | Symbols: | Ribosomal L28e protein family | chr4:14468439-14469964 REVERSE LENGTH=143
3	3	3		AT4G29380.1	AT4G29380.1	AT4G29380.1 | Symbols: | protein kinase family protein / WD-40 repeat family protein | chr4:14458822-14464692 FORWARD LENGTH=1494
0	3	0		AT4G29230.1	AT4G29230.1;AT5G56620.1	AT4G29230.1 | Symbols: anac075, NAC075 | NAC domain containing protein 75 | chr4:14410338-14414956 FORWARD LENGTH=498
3	3	3		AT4G29220.1	AT4G29220.1;AT5G61580.2;AT5G61580.1	AT4G29220.1 | Symbols: PFK1 | phosphofructokinase 1 | chr4:14403621-14406071 REVERSE LENGTH=473
0	3	0		AT4G29160.3;AT4G29160.1;AT4G29160.2	AT4G29160.3;AT4G29160.1;AT4G29160.2	AT4G29160.3 | Symbols: SNF7.1 | SNF7 family protein | chr4:14381019-14382342 FORWARD LENGTH=219;AT4G29160.1 | Symbols: SNF7.1 | SNF7 family protein | chr4:14381019-14382342 FORWARD LENGTH=219;AT4G29160.2 | Symbols: SNF7.1 | SNF7 family protein | chr4:14381
3	3	3		AT4G29130.1	AT4G29130.1	AT4G29130.1 | Symbols: ATHXK1, GIN2, HXK1 | hexokinase 1 | chr4:14352338-14354865 REVERSE LENGTH=496
3	3	3		AT4G29060.1;AT4G29060.2	AT4G29060.1;AT4G29060.2	AT4G29060.1 | Symbols: emb2726 | elongation factor Ts family protein | chr4:14317744-14321315 FORWARD LENGTH=953;AT4G29060.2 | Symbols: emb2726 | elongation factor Ts family protein | chr4:14317744-14321315 FORWARD LENGTH=709
3	3	3		AT4G29040.1;AT2G20140.1	AT4G29040.1;AT2G20140.1	AT4G29040.1 | Symbols: RPT2a | regulatory particle AAA-ATPase 2A | chr4:14312369-14314386 FORWARD LENGTH=443;AT2G20140.1 | Symbols: | AAA-type ATPase family protein | chr2:8692736-8694837 FORWARD LENGTH=443
3	3	3		AT4G29010.1	AT4G29010.1	AT4G29010.1 | Symbols: AIM1 | Enoyl-CoA hydratase/isomerase family | chr4:14297312-14302016 REVERSE LENGTH=721
0	3	2		AT4G29000.1	AT4G29000.1	AT4G29000.1 | Symbols: | Tesmin/TSO1-like CXC domain-containing protein | chr4:14293957-14296602 FORWARD LENGTH=603
3	3	3		AT4G28990.1;AT4G28990.2	AT4G28990.1;AT4G28990.2	AT4G28990.1 | Symbols: | RNA-binding protein-related | chr4:14291205-14293018 FORWARD LENGTH=347;AT4G28990.2 | Symbols: | RNA-binding protein-related | chr4:14291205-14293018 FORWARD LENGTH=395
0	3	3		AT4G28980.2;AT4G28980.1	AT4G28980.2;AT4G28980.1	AT4G28980.2 | Symbols: CDKF;1, CAK1AT | CDK-activating kinase 1AT | chr4:14288471-14290102 FORWARD LENGTH=479;AT4G28980.1 | Symbols: CDKF;1, CAK1AT | CDK-activating kinase 1AT | chr4:14288471-14290102 FORWARD LENGTH=479
0	3	3		AT4G28910.3;AT4G28910.2;AT4G28910.1	AT4G28910.3;AT4G28910.2;AT4G28910.1	AT4G28910.3 | Symbols: NINJA | novel interactor of JAZ | chr4:14264330-14265680 REVERSE LENGTH=425;AT4G28910.2 | Symbols: NINJA | novel interactor of JAZ | chr4:14264330-14265680 REVERSE LENGTH=425;AT4G28910.1 | Symbols: NINJA | novel interactor of JAZ | c
3	3	3		AT4G28880.1;AT4G28860.2;AT4G28860.1	AT4G28880.1;AT4G28860.2;AT4G28860.1	AT4G28880.1 | Symbols: ckl3 | casein kinase I-like 3 | chr4:14251351-14254048 FORWARD LENGTH=415;AT4G28860.2 | Symbols: ckl4 | casein kinase I-like 4 | chr4:14246359-14248823 FORWARD LENGTH=378;AT4G28860.1 | Symbols: ckl4 | casein kinase I-like 4 | chr4:14
3	3	3		AT4G28750.1	AT4G28750.1	AT4G28750.1 | Symbols: PSAE-1 | Photosystem I reaction centre subunit IV / PsaE protein | chr4:14202951-14203888 REVERSE LENGTH=143
1	3	3		AT4G28610.1	AT4G28610.1;AT3G04450.2;AT3G04450.1	AT4G28610.1 | Symbols: PHR1, AtPHR1 | phosphate starvation response 1 | chr4:14133164-14134951 REVERSE LENGTH=409
3	3	3		AT4G28520.1;AT4G28520.3;AT4G28520.2;AT4G28520.4	AT4G28520.1;AT4G28520.3;AT4G28520.2;AT4G28520.4	AT4G28520.1 | Symbols: CRU3, CRC | cruciferin 3 | chr4:14087596-14089617 FORWARD LENGTH=524;AT4G28520.3 | Symbols: CRU3, CRC | cruciferin 3 | chr4:14087596-14089617 FORWARD LENGTH=453;AT4G28520.2 | Symbols: CRU3, CRC | cruciferin 3 | chr4:14087596-14089229
3	3	3		AT4G28450.1	AT4G28450.1	AT4G28450.1 | Symbols: | nucleotide binding;protein binding | chr4:14061724-14064582 REVERSE LENGTH=452
3	3	3		AT4G28440.1	AT4G28440.1	AT4G28440.1 | Symbols: | Nucleic acid-binding, OB-fold-like protein | chr4:14060054-14060970 FORWARD LENGTH=153
2	3	3		AT4G28400.1	AT4G28400.1	AT4G28400.1 | Symbols: | Protein phosphatase 2C family protein | chr4:14048499-14050118 FORWARD LENGTH=283
3	3	3		AT4G28300.2;AT4G28300.1	AT4G28300.2;AT4G28300.1	AT4G28300.2 | Symbols: | Protein of unknown function (DUF1421) | chr4:14015414-14016823 FORWARD LENGTH=438;AT4G28300.1 | Symbols: | Protein of unknown function (DUF1421) | chr4:14014860-14016823 FORWARD LENGTH=496
3	3	3		AT4G28200.1	AT4G28200.1	AT4G28200.1 | Symbols: | FUNCTIONS IN: molecular_function unknown;INVOLVED IN: RNA processing;LOCATED IN: intracellular;EXPRESSED IN: 22 plant structures;EXPRESSED DURING: 13 growth stages;CONTAINS InterPro DOMAIN/s: RNA-processing protein, HAT helix
3	3	3		AT4G28080.1	AT4G28080.1	AT4G28080.1 | Symbols: | Tetratricopeptide repeat (TPR)-like superfamily protein | chr4:13948993-13957840 REVERSE LENGTH=1819
2	3	3		AT4G27870.1	AT4G27870.1	AT4G27870.1 | Symbols: | Vacuolar iron transporter (VIT) family protein | chr4:13878983-13882679 FORWARD LENGTH=761
3	3	3		AT4G27700.1	AT4G27700.1	AT4G27700.1 | Symbols: | Rhodanese/Cell cycle control phosphatase superfamily protein | chr4:13826541-13827673 REVERSE LENGTH=224
3	3	3		AT4G27690.2;AT4G27690.1;AT5G53530.1	AT4G27690.2;AT4G27690.1;AT5G53530.1	AT4G27690.2 | Symbols: VPS26B | vacuolar protein sorting 26B | chr4:13824324-13826235 FORWARD LENGTH=275;AT4G27690.1 | Symbols: VPS26B | vacuolar protein sorting 26B | chr4:13824019-13826235 FORWARD LENGTH=303;AT5G53530.1 | Symbols: VPS26A | vacuolar prote
3	0	3		AT4G27640.1	AT4G27640.1	AT4G27640.1 | Symbols: | ARM repeat superfamily protein | chr4:13798013-13802976 REVERSE LENGTH=1048
3	3	3		AT4G27585.1	AT4G27585.1	AT4G27585.1 | Symbols: | SPFH/Band 7/PHB domain-containing membrane-associated protein family | chr4:13766984-13769832 REVERSE LENGTH=411
3	3	3		AT4G27500.1	AT4G27500.1	AT4G27500.1 | Symbols: PPI1 | proton pump interactor 1 | chr4:13743614-13745900 FORWARD LENGTH=612
0	3	1		AT4G27490.1	AT4G27490.1	AT4G27490.1 | Symbols: | 3-5-exoribonuclease family protein | chr4:13739961-13741647 FORWARD LENGTH=256
2	3	3		AT4G27450.1	AT4G27450.1	AT4G27450.1 | Symbols: | Aluminium induced protein with YGL and LRDR motifs | chr4:13727665-13728683 REVERSE LENGTH=250
3	3	3		AT4G27440.2;AT4G27440.1	AT4G27440.2;AT4G27440.1;AT5G54190.1;AT5G54190.2	AT4G27440.2 | Symbols: PORB | protochlorophyllide oxidoreductase B | chr4:13725648-13727107 FORWARD LENGTH=401;AT4G27440.1 | Symbols: PORB | protochlorophyllide oxidoreductase B | chr4:13725648-13727107 FORWARD LENGTH=401
3	3	3		AT4G27430.2;AT4G27430.1	AT4G27430.2;AT4G27430.1	AT4G27430.2 | Symbols: CIP7 | COP1-interacting protein 7 | chr4:13718817-13722736 FORWARD LENGTH=1058;AT4G27430.1 | Symbols: CIP7 | COP1-interacting protein 7 | chr4:13718817-13722736 FORWARD LENGTH=1058
3	3	3		AT4G27320.1	AT4G27320.1	AT4G27320.1 | Symbols: ATPHOS34, PHOS34 | Adenine nucleotide alpha hydrolases-like superfamily protein | chr4:13678860-13680717 REVERSE LENGTH=260
3	3	3		AT4G27170.1	AT4G27170.1	AT4G27170.1 | Symbols: SESA4, AT2S4 | seed storage albumin 4 | chr4:13613637-13614137 FORWARD LENGTH=166
3	3	3		AT4G27160.1	AT4G27160.1	AT4G27160.1 | Symbols: AT2S3, SESA3 | seed storage albumin 3 | chr4:13611836-13612330 FORWARD LENGTH=164
3	3	3		AT4G27140.1	AT4G27140.1	AT4G27140.1 | Symbols: SESA1, AT2S1 | seed storage albumin 1 | chr4:13607363-13607857 FORWARD LENGTH=164
0	3	3		AT4G27120.2;AT4G27120.1	AT4G27120.2;AT4G27120.1	AT4G27120.2 | Symbols: | CONTAINS InterPro DOMAIN/s: DDRGK domain (InterPro:IPR019153);Has 14775 Blast hits to 8764 proteins in 778 species: Archae - 29;Bacteria - 1878;Metazoa - 5164;Fungi - 1447;Plants - 582;Viruses - 164;Other Eukaryotes - 5511
3	3	3		AT4G27090.1	AT4G27090.1	AT4G27090.1 | Symbols: | Ribosomal protein L14 | chr4:13594104-13595187 REVERSE LENGTH=134
3	3	3		AT4G27060.1	AT4G27060.1;AT1G50890.1	AT4G27060.1 | Symbols: TOR1, SPR2, CN | ARM repeat superfamily protein | chr4:13581581-13585070 REVERSE LENGTH=864
3	3	3		AT4G27000.1	AT4G27000.1	AT4G27000.1 | Symbols: ATRBP45C | RNA-binding (RRM/RBD/RNP motifs) family protein | chr4:13554983-13557763 REVERSE LENGTH=415
3	3	3		AT4G26970.1	AT4G26970.1	AT4G26970.1 | Symbols: ACO2 | aconitase 2 | chr4:13543077-13548427 FORWARD LENGTH=995
3	3	3		AT4G26910.3;AT4G26910.2;AT4G26910.1	AT4G26910.3;AT4G26910.2;AT4G26910.1	AT4G26910.3 | Symbols: | Dihydrolipoamide succinyltransferase | chr4:13520127-13522055 REVERSE LENGTH=365;AT4G26910.2 | Symbols: | Dihydrolipoamide succinyltransferase | chr4:13520127-13522889 REVERSE LENGTH=463;AT4G26910.1 | Symbols: | Dihydrolipoamide
3	3	3		AT4G26900.1	AT4G26900.1	AT4G26900.1 | Symbols: AT-HF, HISN4 | HIS HF | chr4:13515514-13519608 FORWARD LENGTH=592
3	3	3		AT4G26870.1	AT4G26870.1	AT4G26870.1 | Symbols: | Class II aminoacyl-tRNA and biotin synthetases superfamily protein | chr4:13505381-13507619 FORWARD LENGTH=532
2	3	3		AT4G26750.1	AT4G26750.1	AT4G26750.1 | Symbols: | hydroxyproline-rich glycoprotein family protein | chr4:13475848-13478382 REVERSE LENGTH=421
3	3	3		AT4G26740.1	AT4G26740.1	AT4G26740.1 | Symbols: ATS1, CLO1, ATPXG1 | seed gene 1 | chr4:13473791-13475278 REVERSE LENGTH=245
3	3	3		AT4G26650.2;AT4G26650.1	AT4G26650.2;AT4G26650.1	AT4G26650.2 | Symbols: | RNA-binding (RRM/RBD/RNP motifs) family protein | chr4:13445265-13447592 FORWARD LENGTH=452;AT4G26650.1 | Symbols: | RNA-binding (RRM/RBD/RNP motifs) family protein | chr4:13445552-13447592 FORWARD LENGTH=455
0	3	3		AT4G26640.1;AT4G26640.2	AT4G26640.1;AT4G26640.2	AT4G26640.1 | Symbols: WRKY20, AtWRKY20 | WRKY family transcription factor family protein | chr4:13437298-13439774 REVERSE LENGTH=485;AT4G26640.2 | Symbols: WRKY20, AtWRKY20 | WRKY family transcription factor family protein | chr4:13437298-13440693 REVERSE
3	3	3		AT4G26630.2;AT4G26630.1	AT4G26630.2;AT4G26630.1	AT4G26630.2 | Symbols: | DEK domain-containing chromatin associated protein | chr4:13430873-13434877 REVERSE LENGTH=763;AT4G26630.1 | Symbols: | DEK domain-containing chromatin associated protein | chr4:13430873-13434877 REVERSE LENGTH=763
3	3	3		AT4G26600.1	AT4G26600.1	AT4G26600.1 | Symbols: | S-adenosyl-L-methionine-dependent methyltransferases superfamily protein | chr4:13419629-13423418 FORWARD LENGTH=671
3	3	3		AT4G26530.2;AT4G26530.1	AT4G26530.2;AT4G26530.1	AT4G26530.2 | Symbols: | Aldolase superfamily protein | chr4:13391566-13392937 FORWARD LENGTH=358;AT4G26530.1 | Symbols: | Aldolase superfamily protein | chr4:13391566-13392937 FORWARD LENGTH=358
3	3	3		AT4G26510.2;AT4G26510.1	AT4G26510.2;AT4G26510.1	AT4G26510.2 | Symbols: UKL4 | uridine kinase-like 4 | chr4:13384503-13387920 FORWARD LENGTH=469;AT4G26510.1 | Symbols: UKL4 | uridine kinase-like 4 | chr4:13384503-13387920 FORWARD LENGTH=469
0	3	0		AT4G26455.1	AT4G26455.1	AT4G26455.1 | Symbols: WIP1 | WPP domain interacting protein 1 | chr4:13365737-13367384 FORWARD LENGTH=489
3	3	3		AT4G26450.1	AT4G26450.1	AT4G26450.1 | Symbols: | unknown protein;Has 614 Blast hits to 492 proteins in 137 species: Archae - 0;Bacteria - 94;Metazoa - 255;Fungi - 76;Plants - 69;Viruses - 0;Other Eukaryotes - 120 (source: NCBI BLink). | chr4:13362556-13364920 FORWARD LENG
3	3	3		AT4G26300.1	AT4G26300.1	AT4G26300.1 | Symbols: emb1027 | Arginyl-tRNA synthetase, class Ic | chr4:13308400-13313109 REVERSE LENGTH=642
3	3	3		AT4G26190.1	AT4G26190.1	AT4G26190.1 | Symbols: | Haloacid dehalogenase-like hydrolase (HAD) superfamily protein | chr4:13262473-13266282 REVERSE LENGTH=1057
3	3	3		AT4G26110.1;AT4G26110.2	AT4G26110.1;AT4G26110.2	AT4G26110.1 | Symbols: NAP1;1, ATNAP1;1 | nucleosome assembly protein1;1 | chr4:13232712-13235502 FORWARD LENGTH=372;AT4G26110.2 | Symbols: NAP1;1 | nucleosome assembly protein1;1 | chr4:13232712-13235060 FORWARD LENGTH=359
3	3	3		AT4G26010.1	AT4G26010.1	AT4G26010.1 | Symbols: | Peroxidase superfamily protein | chr4:13200653-13201688 FORWARD LENGTH=310
3	3	3		AT4G25740.1;AT4G25740.2	AT4G25740.1;AT4G25740.2	AT4G25740.1 | Symbols: | RNA binding Plectin/S10 domain-containing protein | chr4:13107488-13108751 REVERSE LENGTH=177;AT4G25740.2 | Symbols: | RNA binding Plectin/S10 domain-containing protein | chr4:13107488-13108751 REVERSE LENGTH=149
3	3	3		AT4G25730.1	AT4G25730.1	AT4G25730.1 | Symbols: | FtsJ-like methyltransferase family protein | chr4:13102906-13106718 REVERSE LENGTH=821
1	3	2		AT4G25680.1	AT4G25680.1	AT4G25680.1 | Symbols: | PPPDE putative thiol peptidase family protein | chr4:13088425-13089952 FORWARD LENGTH=252
3	3	3		AT4G25630.1	AT4G25630.1;AT5G52490.1	AT4G25630.1 | Symbols: FIB2, ATFIB2 | fibrillarin 2 | chr4:13074239-13076205 FORWARD LENGTH=320
2	3	2		AT4G25580.1	AT4G25580.1	AT4G25580.1 | Symbols: | CAP160 protein | chr4:13056320-13058657 FORWARD LENGTH=626
3	3	3		AT4G25550.1	AT4G25550.1	AT4G25550.1 | Symbols: | Cleavage/polyadenylation specificity factor, 25kDa subunit | chr4:13048519-13050873 FORWARD LENGTH=200
3	3	3		AT4G25520.1	AT4G25520.1;AT4G25515.1	AT4G25520.1 | Symbols: SLK1 | SEUSS-like 1 | chr4:13032450-13035803 REVERSE LENGTH=748
3	3	3		AT4G25450.3;AT4G25450.1;AT4G25450.2	AT4G25450.3;AT4G25450.1;AT4G25450.2	AT4G25450.3 | Symbols: ATNAP8, NAP8 | non-intrinsic ABC protein 8 | chr4:13009845-13013229 REVERSE LENGTH=545;AT4G25450.1 | Symbols: ATNAP8, NAP8 | non-intrinsic ABC protein 8 | chr4:13009845-13013912 REVERSE LENGTH=714;AT4G25450.2 | Symbols: ATNAP8, NAP8
3	3	3		AT4G25340.1;AT4G25340.2	AT4G25340.1;AT4G25340.2	AT4G25340.1 | Symbols: FKBP53, ATFKBP53 | FK506 BINDING PROTEIN 53 | chr4:12959657-12962632 REVERSE LENGTH=477;AT4G25340.2 | Symbols: FKBP53 | FK506 BINDING PROTEIN 53 | chr4:12959863-12962632 REVERSE LENGTH=444
3	3	3		AT4G25320.1	AT4G25320.1	AT4G25320.1 | Symbols: | AT hook motif DNA-binding family protein | chr4:12954488-12956342 FORWARD LENGTH=404
3	3	3		AT4G25210.1	AT4G25210.1	AT4G25210.1 | Symbols: | DNA-binding storekeeper protein-related transcriptional regulator | chr4:12918446-12919552 FORWARD LENGTH=368
3	3	3		AT4G25140.1	AT4G25140.1	AT4G25140.1 | Symbols: OLEO1, OLE1 | oleosin 1 | chr4:12900498-12901259 FORWARD LENGTH=173
3	3	3		AT4G25080.4;AT4G25080.5;AT4G25080.3;AT4G25080.2;AT4G25080.1	AT4G25080.4;AT4G25080.5;AT4G25080.3;AT4G25080.2;AT4G25080.1	AT4G25080.4 | Symbols: CHLM | magnesium-protoporphyrin IX methyltransferase | chr4:12877216-12878128 FORWARD LENGTH=245;AT4G25080.5 | Symbols: CHLM | magnesium-protoporphyrin IX methyltransferase | chr4:12877015-12878128 FORWARD LENGTH=312;AT4G25080.3 | Sy
3	3	3		AT4G25050.1;AT4G25050.2	AT4G25050.1;AT4G25050.2	AT4G25050.1 | Symbols: ACP4 | acyl carrier protein 4 | chr4:12870178-12871024 FORWARD LENGTH=137;AT4G25050.2 | Symbols: ACP4 | acyl carrier protein 4 | chr4:12870178-12871024 FORWARD LENGTH=149
3	3	3		AT4G24830.1;AT4G24830.2	AT4G24830.1;AT4G24830.2	AT4G24830.1 | Symbols: | arginosuccinate synthase family | chr4:12793085-12795857 REVERSE LENGTH=494;AT4G24830.2 | Symbols: | arginosuccinate synthase family | chr4:12793085-12795857 REVERSE LENGTH=450
3	3	3		AT4G24820.2;AT4G24820.1	AT4G24820.2;AT4G24820.1	AT4G24820.2 | Symbols: | 26S proteasome, regulatory subunit Rpn7;Proteasome component (PCI) domain | chr4:12790471-12792599 REVERSE LENGTH=387;AT4G24820.1 | Symbols: | 26S proteasome, regulatory subunit Rpn7;Proteasome component (PCI) domain | chr4:12790
3	3	3		AT4G24800.3;AT4G24800.2;AT4G24800.1	AT4G24800.3;AT4G24800.2;AT4G24800.1	AT4G24800.3 | Symbols: | MA3 domain-containing protein | chr4:12782463-12784902 FORWARD LENGTH=702;AT4G24800.2 | Symbols: | MA3 domain-containing protein | chr4:12782463-12784902 FORWARD LENGTH=702;AT4G24800.1 | Symbols: | MA3 domain-containing protein
3	3	3		AT4G24780.2;AT4G24780.1	AT4G24780.2;AT4G24780.1	AT4G24780.2 | Symbols: | Pectin lyase-like superfamily protein | chr4:12770631-12772227 REVERSE LENGTH=408;AT4G24780.1 | Symbols: | Pectin lyase-like superfamily protein | chr4:12770631-12772227 REVERSE LENGTH=408
3	3	3		AT4G24750.1	AT4G24750.1	AT4G24750.1 | Symbols: | Rhodanese/Cell cycle control phosphatase superfamily protein | chr4:12758422-12760749 REVERSE LENGTH=292
0	3	0		AT4G24690.1	AT4G24690.1	AT4G24690.1 | Symbols: | ubiquitin-associated (UBA)/TS-N domain-containing protein / octicosapeptide/Phox/Bemp1 (PB1) domain-containing protein | chr4:12741191-12744202 FORWARD LENGTH=704
3	3	3		AT4G24680.1	AT4G24680.1	AT4G24680.1 | Symbols: MOS1 | modifier of snc1 | chr4:12733425-12739737 FORWARD LENGTH=1427
3	3	3		AT4G24550.2;AT4G24550.1;AT4G24550.3	AT4G24550.2;AT4G24550.1;AT4G24550.3	AT4G24550.2 | Symbols: | Clathrin adaptor complexes medium subunit family protein | chr4:12675873-12678903 FORWARD LENGTH=451;AT4G24550.1 | Symbols: | Clathrin adaptor complexes medium subunit family protein | chr4:12675873-12678526 FORWARD LENGTH=380;AT
3	3	3		AT4G24510.1	AT4G24510.1	AT4G24510.1 | Symbols: CER2, VC2, VC-2 | HXXXD-type acyl-transferase family protein | chr4:12660929-12662537 FORWARD LENGTH=421
0	3	1		AT4G24370.1	AT4G24370.1	AT4G24370.1 | Symbols: | unknown protein;Has 30201 Blast hits to 17322 proteins in 780 species: Archae - 12;Bacteria - 1396;Metazoa - 17338;Fungi - 3422;Plants - 5037;Viruses - 0;Other Eukaryotes - 2996 (source: NCBI BLink). | chr4:12611608-1261210
3	3	3		AT4G24280.1	AT4G24280.1	AT4G24280.1 | Symbols: cpHsc70-1 | chloroplast heat shock protein 70-1 | chr4:12590094-12593437 FORWARD LENGTH=718
3	3	3		AT4G24270.1;AT4G24270.2	AT4G24270.1;AT4G24270.2	AT4G24270.1 | Symbols: EMB140 | EMBRYO DEFECTIVE 140 | chr4:12581765-12587293 REVERSE LENGTH=816;AT4G24270.2 | Symbols: EMB140 | EMBRYO DEFECTIVE 140 | chr4:12581765-12587293 REVERSE LENGTH=817
0	3	1		AT4G24240.1	AT4G24240.1	AT4G24240.1 | Symbols: WRKY7, ATWRKY7 | WRKY DNA-binding protein 7 | chr4:12571930-12573446 FORWARD LENGTH=353
0	3	3		AT4G24200.1	AT4G24200.1	AT4G24200.1 | Symbols: | Transcription elongation factor (TFIIS) family protein | chr4:12556927-12559929 REVERSE LENGTH=1000
3	3	3		AT4G24190.2;AT4G24190.1	AT4G24190.2;AT4G24190.1	AT4G24190.2 | Symbols: SHD, AtHsp90.7, AtHsp90-7 | Chaperone protein htpG family protein | chr4:12551902-12555851 REVERSE LENGTH=823;AT4G24190.1 | Symbols: SHD, HSP90.7, AtHsp90.7, AtHsp90-7 | Chaperone protein htpG family protein | chr4:12551902-12555851
0	3	0		AT4G24060.1	AT4G24060.1	AT4G24060.1 | Symbols: | Dof-type zinc finger DNA-binding family protein | chr4:12503970-12505417 FORWARD LENGTH=342
3	3	2		AT4G24020.1	AT4G24020.1	AT4G24020.1 | Symbols: NLP7 | NIN like protein 7 | chr4:12479904-12483822 FORWARD LENGTH=959
0	3	3		AT4G23860.3;AT4G23860.2;AT4G23860.1	AT4G23860.3;AT4G23860.2;AT4G23860.1	AT4G23860.3 | Symbols: | PHD finger protein-related | chr4:12409336-12411336 FORWARD LENGTH=452;AT4G23860.2 | Symbols: | PHD finger protein-related | chr4:12409336-12411336 FORWARD LENGTH=452;AT4G23860.1 | Symbols: | PHD finger protein-related | chr4:12
3	3	3		AT4G23850.1	AT4G23850.1;AT1G64400.1;AT4G11030.1	AT4G23850.1 | Symbols: LACS4 | AMP-dependent synthetase and ligase family protein | chr4:12403720-12408263 REVERSE LENGTH=666
1	3	3		AT4G23710.1	AT4G23710.1	AT4G23710.1 | Symbols: VHA-G2, VAG2, VATG2 | vacuolar ATP synthase subunit G2 | chr4:12350577-12351354 FORWARD LENGTH=106
3	3	2		AT4G23690.1	AT4G23690.1;AT1G64160.1	AT4G23690.1 | Symbols: | Disease resistance-responsive (dirigent-like protein) family protein | chr4:12339152-12339715 REVERSE LENGTH=187
3	3	3		AT4G23680.1	AT4G23680.1	AT4G23680.1 | Symbols: | Polyketide cyclase/dehydrase and lipid transport superfamily protein | chr4:12336416-12337417 REVERSE LENGTH=151
3	3	3		AT4G23670.1	AT4G23670.1	AT4G23670.1 | Symbols: | Polyketide cyclase/dehydrase and lipid transport superfamily protein | chr4:12332846-12333656 REVERSE LENGTH=151
3	3	3		AT4G23650.1	AT4G23650.1	AT4G23650.1 | Symbols: CDPK6, CPK3 | calcium-dependent protein kinase 6 | chr4:12324967-12327415 REVERSE LENGTH=529
3	3	3		AT4G23630.1	AT4G23630.1	AT4G23630.1 | Symbols: BTI1, RTNLB1 | VIRB2-interacting protein 1 | chr4:12318070-12319574 FORWARD LENGTH=275
3	3	3		AT4G23400.1	AT4G23400.1	AT4G23400.1 | Symbols: PIP1D, PIP1;5 | plasma membrane intrinsic protein 1;5 | chr4:12220792-12222155 FORWARD LENGTH=287
3	3	3		AT4G23100.3;AT4G23100.1;AT4G23100.2	AT4G23100.3;AT4G23100.1;AT4G23100.2	AT4G23100.3 | Symbols: GSH1 | glutamate-cysteine ligase | chr4:12103458-12106751 REVERSE LENGTH=522;AT4G23100.1 | Symbols: RML1, PAD2, GSH1, CAD2, ATECS1, GSHA | glutamate-cysteine ligase | chr4:12103458-12106751 REVERSE LENGTH=522;AT4G23100.2 | Symbols: R
3	3	3		AT4G22890.3;AT4G22890.2;AT4G22890.1;AT4G22890.4;AT4G22890.5	AT4G22890.3;AT4G22890.2;AT4G22890.1;AT4G22890.4;AT4G22890.5	AT4G22890.3 | Symbols: PGR5-LIKE A | PGR5-LIKE A | chr4:12007157-12009175 FORWARD LENGTH=324;AT4G22890.2 | Symbols: PGR5-LIKE A | PGR5-LIKE A | chr4:12007157-12009175 FORWARD LENGTH=324;AT4G22890.1 | Symbols: PGR5-LIKE A | PGR5-LIKE A | chr4:12007157-12009
0	3	3		AT4G22745.1	AT4G22745.1	AT4G22745.1 | Symbols: MBD1 | methyl-CPG-binding domain 1 | chr4:11947421-11948514 REVERSE LENGTH=204
1	3	3		AT4G22670.1	AT4G22670.1	AT4G22670.1 | Symbols: AtHip1, HIP1, TPR11 | HSP70-interacting protein 1 | chr4:11918236-11920671 FORWARD LENGTH=441
3	3	3		AT4G22570.1;AT4G12440.1;AT4G12440.2	AT4G22570.1;AT4G12440.1;AT4G12440.2	AT4G22570.1 | Symbols: APT3 | adenine phosphoribosyl transferase 3 | chr4:11882310-11885250 REVERSE LENGTH=183;AT4G12440.1 | Symbols: APT4 | adenine phosphoribosyl transferase 4 | chr4:7376268-7378865 FORWARD LENGTH=178;AT4G12440.2 | Symbols: APT4 | adenin
1	3	2		AT4G22540.4;AT4G22540.3;AT4G22540.2;AT4G22540.1	AT4G22540.4;AT4G22540.3;AT4G22540.2;AT4G22540.1;AT4G12460.1;AT4G12460.2	AT4G22540.4 | Symbols: ORP2A | OSBP(oxysterol binding protein)-related protein 2A | chr4:11860969-11863886 REVERSE LENGTH=510;AT4G22540.3 | Symbols: ORP2A | OSBP(oxysterol binding protein)-related protein 2A | chr4:11860969-11863886 REVERSE LENGTH=510;AT4G
1	3	3		AT4G22360.1	AT4G22360.1	AT4G22360.1 | Symbols: | SWIB complex BAF60b domain-containing protein | chr4:11807811-11809660 FORWARD LENGTH=385
3	3	3		AT4G22310.1	AT4G22310.1	AT4G22310.1 | Symbols: | Uncharacterised protein family (UPF0041) | chr4:11791443-11792638 FORWARD LENGTH=108
3	3	3		AT4G22285.1;AT4G22350.1;AT4G22350.2;AT4G22410.1	AT4G22285.1;AT4G22350.1;AT4G22350.2;AT4G22410.1	AT4G22285.1 | Symbols: | Ubiquitin C-terminal hydrolases superfamily protein | chr4:11779063-11781898 REVERSE LENGTH=541;AT4G22350.1 | Symbols: | Ubiquitin C-terminal hydrolases superfamily protein | chr4:11804073-11806939 REVERSE LENGTH=510;AT4G22350.2
0	3	3		AT4G22150.1	AT4G22150.1	AT4G22150.1 | Symbols: PUX3 | plant UBX domain-containing protein 3 | chr4:11731272-11732800 REVERSE LENGTH=367
3	3	3		AT4G22010.1	AT4G22010.1;AT4G28090.1;AT4G38420.1	AT4G22010.1 | Symbols: sks4 | SKU5 similar 4 | chr4:11663429-11666463 FORWARD LENGTH=541
3	3	3		AT4G21850.1;AT4G21850.2	AT4G21850.1;AT4G21850.2;AT4G04800.1	AT4G21850.1 | Symbols: ATMSRB9, MSRB9 | methionine sulfoxide reductase B9 | chr4:11591378-11592138 REVERSE LENGTH=143;AT4G21850.2 | Symbols: ATMSRB9, MSRB9 | methionine sulfoxide reductase B9 | chr4:11591548-11592138 REVERSE LENGTH=121
3	3	3		AT4G21750.2;AT4G21750.1	AT4G21750.2;AT4G21750.1	AT4G21750.2 | Symbols: ATML1 | Homeobox-leucine zipper family protein / lipid-binding START domain-containing protein | chr4:11556965-11560243 FORWARD LENGTH=762;AT4G21750.1 | Symbols: ATML1 | Homeobox-leucine zipper family protein / lipid-binding START do
3	3	3		AT4G21710.1	AT4G21710.1	AT4G21710.1 | Symbols: NRPB2, EMB1989, RPB2 | DNA-directed RNA polymerase family protein | chr4:11535684-11542200 REVERSE LENGTH=1188
3	3	3		AT4G21670.1	AT4G21670.1	AT4G21670.1 | Symbols: CPL1, FRY2, ATCPL1 | C-terminal domain phosphatase-like 1 | chr4:11511511-11516922 FORWARD LENGTH=967
3	3	3		AT4G21660.1;AT4G21660.2	AT4G21660.1;AT4G21660.2;AT1G11520.1	AT4G21660.1 | Symbols: | proline-rich spliceosome-associated (PSP) family protein | chr4:11506259-11509772 REVERSE LENGTH=584;AT4G21660.2 | Symbols: | proline-rich spliceosome-associated (PSP) family protein | chr4:11506259-11509772 REVERSE LENGTH=598
3	3	3		AT4G21450.1;AT4G21450.3;AT4G21450.2	AT4G21450.1;AT4G21450.3;AT4G21450.2	AT4G21450.1 | Symbols: | PapD-like superfamily protein | chr4:11426136-11428125 FORWARD LENGTH=295;AT4G21450.3 | Symbols: | PapD-like superfamily protein | chr4:11426136-11428125 FORWARD LENGTH=314;AT4G21450.2 | Symbols: | PapD-like superfamily protein
3	3	3		AT4G21280.1;AT4G21280.2	AT4G21280.1;AT4G21280.2	AT4G21280.1 | Symbols: PSBQ, PSBQA, PSBQ-1 | photosystem II subunit QA | chr4:11334446-11335587 FORWARD LENGTH=223;AT4G21280.2 | Symbols: PSBQ, PSBQA, PSBQ-1 | photosystem II subunit QA | chr4:11334446-11335587 FORWARD LENGTH=224
3	3	2		AT4G21160.4;AT4G21160.3;AT4G21160.2;AT4G21160.1	AT4G21160.4;AT4G21160.3;AT4G21160.2;AT4G21160.1	AT4G21160.4 | Symbols: ZAC | Calcium-dependent ARF-type GTPase activating protein family | chr4:11284694-11286532 FORWARD LENGTH=337;AT4G21160.3 | Symbols: ZAC | Calcium-dependent ARF-type GTPase activating protein family | chr4:11284694-11286532 FORWARD L
3	3	3		AT4G21150.3;AT4G21150.1;AT4G21150.2	AT4G21150.3;AT4G21150.1;AT4G21150.2	AT4G21150.3 | Symbols: HAP6 | ribophorin II (RPN2) family protein | chr4:11278646-11283599 FORWARD LENGTH=691;AT4G21150.1 | Symbols: HAP6 | ribophorin II (RPN2) family protein | chr4:11278646-11283599 FORWARD LENGTH=691;AT4G21150.2 | Symbols: HAP6 | riboph
1	3	2		AT4G21020.1	AT4G21020.1	AT4G21020.1 | Symbols: | Late embryogenesis abundant protein (LEA) family protein | chr4:11228263-11229392 FORWARD LENGTH=266
3	3	3		AT4G20890.1	AT4G20890.1	AT4G20890.1 | Symbols: TUB9 | tubulin beta-9 chain | chr4:11182218-11183840 FORWARD LENGTH=444
3	3	3		AT4G20850.1	AT4G20850.1	AT4G20850.1 | Symbols: TPP2 | tripeptidyl peptidase ii | chr4:11160935-11169889 REVERSE LENGTH=1380
0	3	3		AT4G20410.1	AT4G20410.1	AT4G20410.1 | Symbols: GSNAP, GAMMA-SNAP | gamma-soluble NSF attachment protein | chr4:11014099-11016454 REVERSE LENGTH=291
3	3	3		AT4G20400.1;AT4G20400.2	AT4G20400.1;AT4G20400.2	AT4G20400.1 | Symbols: JMJ14, PKDM7B | JUMONJI 14 | chr4:11009004-11013588 FORWARD LENGTH=954;AT4G20400.2 | Symbols: JMJ14, PKDM7B | JUMONJI 14 | chr4:11009753-11013588 FORWARD LENGTH=897
3	3	3		AT4G20360.1	AT4G20360.1	AT4G20360.1 | Symbols: ATRAB8D, ATRABE1B, RABE1b | RAB GTPase homolog E1B | chr4:10990036-10991466 FORWARD LENGTH=476
1	3	3		AT4G20330.1	AT4G20330.1;AT4G21010.1	AT4G20330.1 | Symbols: | Transcription initiation factor TFIIE, beta subunit | chr4:10982683-10984039 REVERSE LENGTH=286
2	3	3		AT4G20260.5;AT4G20260.3;AT4G20260.2;AT4G20260.1;AT4G20260.4;AT4G20260.6	AT4G20260.5;AT4G20260.3;AT4G20260.2;AT4G20260.1;AT4G20260.4;AT4G20260.6	AT4G20260.5 | Symbols: PCAP1 | plasma-membrane associated cation-binding protein 1 | chr4:10941593-10943120 FORWARD LENGTH=167;AT4G20260.3 | Symbols: ATPCAP1, PCAP1 | plasma-membrane associated cation-binding protein 1 | chr4:10941593-10943227 FORWARD LENG
3	3	3		AT4G19880.3;AT4G19880.1;AT4G19880.2	AT4G19880.3;AT4G19880.1;AT4G19880.2	AT4G19880.3 | Symbols: | Glutathione S-transferase family protein | chr4:10784824-10786376 REVERSE LENGTH=313;AT4G19880.1 | Symbols: | Glutathione S-transferase family protein | chr4:10784691-10786376 REVERSE LENGTH=356;AT4G19880.2 | Symbols: | Glutathi
0	3	0		AT4G19840.1	AT4G19840.1	AT4G19840.1 | Symbols: ATPP2-A1, ATPP2A-1, PP2-A1 | phloem protein 2-A1 | chr4:10774336-10775701 FORWARD LENGTH=246
3	3	3		AT4G19710.2;AT4G19710.1	AT4G19710.2;AT4G19710.1	AT4G19710.2 | Symbols: AK-HSDH II, AK-HSDH | aspartate kinase-homoserine dehydrogenase ii | chr4:10725229-10729536 FORWARD LENGTH=916;AT4G19710.1 | Symbols: AK-HSDH II, AK-HSDH | aspartate kinase-homoserine dehydrogenase ii | chr4:10725229-10729278 FORWARD
3	3	3		AT4G19610.1	AT4G19610.1;AT3G46020.1	AT4G19610.1 | Symbols: | nucleotide binding;nucleic acid binding;RNA binding | chr4:10677482-10681623 FORWARD LENGTH=816
3	3	3		AT4G19410.1;AT4G19410.2	AT4G19410.1;AT4G19410.2	AT4G19410.1 | Symbols: | Pectinacetylesterase family protein | chr4:10582188-10584766 REVERSE LENGTH=391;AT4G19410.2 | Symbols: | Pectinacetylesterase family protein | chr4:10581037-10584766 REVERSE LENGTH=517
0	3	1		AT4G19350.1	AT4G19350.1	AT4G19350.1 | Symbols: EMB3006 | embryo defective 3006 | chr4:10562214-10563676 REVERSE LENGTH=180
3	3	3		AT4G19210.1	AT4G19210.1;AT3G13640.1	AT4G19210.1 | Symbols: ATRLI2, RLI2 | RNAse l inhibitor protein 2 | chr4:10501906-10504776 FORWARD LENGTH=605
3	3	3		AT4G19190.1	AT4G19190.1	AT4G19190.1 | Symbols: | zinc knuckle (CCHC-type) family protein | chr4:10493323-10495969 FORWARD LENGTH=595
2	3	3		AT4G18950.1	AT4G18950.1	AT4G18950.1 | Symbols: | Integrin-linked protein kinase family | chr4:10375685-10378129 FORWARD LENGTH=459
3	3	3		AT4G18920.1	AT4G18920.1	AT4G18920.1 | Symbols: | Protein of unknown function (DUF1264) | chr4:10368784-10370086 FORWARD LENGTH=247
2	3	3		AT4G18905.1;AT4G18905.2	AT4G18905.1;AT4G18905.2;AT4G18900.1	AT4G18905.1 | Symbols: | Transducin/WD40 repeat-like superfamily protein | chr4:10360234-10362991 FORWARD LENGTH=494;AT4G18905.2 | Symbols: | Transducin/WD40 repeat-like superfamily protein | chr4:10360234-10362991 FORWARD LENGTH=504
3	3	3		AT4G18820.1	AT4G18820.1	AT4G18820.1 | Symbols: | AAA-type ATPase family protein | chr4:10330371-10334090 FORWARD LENGTH=1097
3	3	3		AT4G18480.1	AT4G18480.1	AT4G18480.1 | Symbols: CHLI1, CH42, CH-42, CHL11, CHLI-1 | P-loop containing nucleoside triphosphate hydrolases superfamily protein | chr4:10201897-10203361 REVERSE LENGTH=424
2	3	3		AT4G18260.1	AT4G18260.1	AT4G18260.1 | Symbols: | Cytochrome b561/ferric reductase transmembrane protein family | chr4:10093524-10097337 REVERSE LENGTH=545
3	3	3		AT4G18240.1	AT4G18240.1	AT4G18240.1 | Symbols: ATSS4, SSIV, SS4 | starch synthase 4 | chr4:10082221-10087044 FORWARD LENGTH=1040
3	3	3		AT4G18130.1	AT4G18130.1	AT4G18130.1 | Symbols: PHYE | phytochrome E | chr4:10042312-10045948 REVERSE LENGTH=1112
3	3	3		AT4G18100.1	AT4G18100.1	AT4G18100.1 | Symbols: | Ribosomal protein L32e | chr4:10035715-10036475 REVERSE LENGTH=133
3	3	3		AT4G18060.1	AT4G18060.1	AT4G18060.1 | Symbols: | SH3 domain-containing protein | chr4:10027668-10029662 REVERSE LENGTH=351
1	3	2		AT4G18040.1	AT4G18040.1;AT1G29550.1;AT1G29590.1;AT1G29590.2	AT4G18040.1 | Symbols: EIF4E, CUM1, AT.EIF4E1, eIF4E1 | eukaryotic translation initiation factor 4E | chr4:10016724-10018151 REVERSE LENGTH=235
3	3	3		AT4G17950.1	AT4G17950.1	AT4G17950.1 | Symbols: | AT hook motif DNA-binding family protein | chr4:9967295-9969007 REVERSE LENGTH=439
3	3	3		AT4G17890.1;AT4G17890.2	AT4G17890.1;AT4G17890.2	AT4G17890.1 | Symbols: AGD8 | ARF-GAP domain 8 | chr4:9937121-9939146 FORWARD LENGTH=413;AT4G17890.2 | Symbols: AGD8 | ARF-GAP domain 8 | chr4:9937121-9938988 FORWARD LENGTH=384
1	3	2		AT4G17800.1	AT4G17800.1	AT4G17800.1 | Symbols: | Predicted AT-hook DNA-binding family protein | chr4:9895549-9896427 REVERSE LENGTH=292
3	3	3		AT4G17770.1	AT4G17770.1	AT4G17770.1 | Symbols: ATTPS5, TPS5 | trehalose phosphatase/synthase 5 | chr4:9877055-9880084 FORWARD LENGTH=862
0	3	3		AT4G17720.1	AT4G17720.1	AT4G17720.1 | Symbols: | RNA-binding (RRM/RBD/RNP motifs) family protein | chr4:9862660-9864498 REVERSE LENGTH=313
3	3	3		AT4G17620.2;AT4G17620.1;AT4G17620.3	AT4G17620.2;AT4G17620.1;AT4G17620.3	AT4G17620.2 | Symbols: | glycine-rich protein | chr4:9822005-9824859 FORWARD LENGTH=544;AT4G17620.1 | Symbols: | glycine-rich protein | chr4:9822005-9824859 FORWARD LENGTH=544;AT4G17620.3 | Symbols: | glycine-rich protein | chr4:9822005-9824859 FORWARD
3	3	3		AT4G17560.1	AT4G17560.1	AT4G17560.1 | Symbols: | Ribosomal protein L19 family protein | chr4:9780343-9781752 FORWARD LENGTH=225
3	3	3		AT4G17530.1	AT4G17530.1	AT4G17530.1 | Symbols: RAB1C, ATRAB1C, ATRABD2C | RAB GTPase homolog 1C | chr4:9773721-9775424 REVERSE LENGTH=202
3	3	3		AT4G17520.1	AT4G17520.1	AT4G17520.1 | Symbols: | Hyaluronan / mRNA binding family | chr4:9771496-9773313 FORWARD LENGTH=360
3	3	3		AT4G17410.1;AT4G17410.3;AT4G17410.2	AT4G17410.1;AT4G17410.3;AT4G17410.2	AT4G17410.1 | Symbols: | DWNN domain, a CCHC-type zinc finger | chr4:9716360-9721642 FORWARD LENGTH=826;AT4G17410.3 | Symbols: | DWNN domain, a CCHC-type zinc finger | chr4:9716360-9721642 FORWARD LENGTH=827;AT4G17410.2 | Symbols: | DWNN domain, a CCHC-
3	3	3		AT4G17330.1	AT4G17330.1	AT4G17330.1 | Symbols: ATG2484-1, G2484-1 | G2484-1 protein | chr4:9689263-9697172 REVERSE LENGTH=2037
3	3	3		AT4G17300.1	AT4G17300.1	AT4G17300.1 | Symbols: NS1, OVA8, ATNS1 | Class II aminoacyl-tRNA and biotin synthetases superfamily protein | chr4:9681558-9684833 FORWARD LENGTH=567
3	3	3		AT4G17170.1	AT4G17170.1	AT4G17170.1 | Symbols: AT-RAB2, ATRABB1C, ATRAB2A, RAB2A, RABB1C, ATRAB-B1B, RAB-B1B | RAB GTPase homolog B1C | chr4:9644908-9646220 REVERSE LENGTH=211
3	3	3		AT4G17140.1;AT4G17140.2;AT4G17140.3	AT4G17140.1;AT4G17140.2;AT4G17140.3	AT4G17140.1 | Symbols: | pleckstrin homology (PH) domain-containing protein | chr4:9613617-9636618 REVERSE LENGTH=4216;AT4G17140.2 | Symbols: | pleckstrin homology (PH) domain-containing protein | chr4:9613617-9636618 REVERSE LENGTH=4218;AT4G17140.3 | Sy
3	3	3		AT4G17090.1	AT4G17090.1	AT4G17090.1 | Symbols: CT-BMY, BAM3, BMY8 | chloroplast beta-amylase | chr4:9605266-9607250 REVERSE LENGTH=548
3	3	3		AT4G17060.1	AT4G17060.1	AT4G17060.1 | Symbols: FIP2 | FRIGIDA interacting protein 2 | chr4:9593721-9594653 REVERSE LENGTH=310
3	3	3		AT4G17040.1	AT4G17040.1	AT4G17040.1 | Symbols: CLPR4 | CLP protease R subunit 4 | chr4:9586740-9589297 REVERSE LENGTH=305
3	3	3		AT4G16990.2;AT4G16990.1;AT4G16990.5;AT4G16990.3;AT4G16990.4	AT4G16990.2;AT4G16990.1;AT4G16990.5;AT4G16990.3;AT4G16990.4	AT4G16990.2 | Symbols: RLM3 | disease resistance protein (TIR-NBS class), putative | chr4:9560155-9565225 FORWARD LENGTH=796;AT4G16990.1 | Symbols: RLM3 | disease resistance protein (TIR-NBS class), putative | chr4:9560155-9564616 FORWARD LENGTH=670;AT4G16
3	3	3		AT4G16830.2;AT4G16830.3;AT4G16830.1	AT4G16830.2;AT4G16830.3;AT4G16830.1	AT4G16830.2 | Symbols: | Hyaluronan / mRNA binding family | chr4:9470979-9472308 FORWARD LENGTH=265;AT4G16830.3 | Symbols: | Hyaluronan / mRNA binding family | chr4:9470652-9472308 FORWARD LENGTH=345;AT4G16830.1 | Symbols: | Hyaluronan / mRNA binding fa
3	3	3		AT4G16720.1;AT4G17390.1	AT4G16720.1;AT4G17390.1	AT4G16720.1 | Symbols: | Ribosomal protein L23/L15e family protein | chr4:9400156-9401315 REVERSE LENGTH=204;AT4G17390.1 | Symbols: | Ribosomal protein L23/L15e family protein | chr4:9714407-9715545 REVERSE LENGTH=204
3	3	3		AT4G16630.1	AT4G16630.1	AT4G16630.1 | Symbols: | DEA(D/H)-box RNA helicase family protein | chr4:9362176-9366449 REVERSE LENGTH=789
3	3	3		AT4G16430.1	AT4G16430.1	AT4G16430.1 | Symbols: | basic helix-loop-helix (bHLH) DNA-binding superfamily protein | chr4:9267599-9269002 FORWARD LENGTH=467
3	3	3		AT4G16390.1	AT4G16390.1	AT4G16390.1 | Symbols: SVR7 | pentatricopeptide (PPR) repeat-containing protein | chr4:9257985-9260093 FORWARD LENGTH=702
3	3	3		AT4G16340.1	AT4G16340.1	AT4G16340.1 | Symbols: SPK1 | guanyl-nucleotide exchange factors;GTPase binding;GTP binding | chr4:9228773-9241060 REVERSE LENGTH=1830
3	3	3		AT4G16330.2;AT4G16330.1	AT4G16330.2;AT4G16330.1	AT4G16330.2 | Symbols: | 2-oxoglutarate (2OG) and Fe(II)-dependent oxygenase superfamily protein | chr4:9226298-9227914 REVERSE LENGTH=364;AT4G16330.1 | Symbols: | 2-oxoglutarate (2OG) and Fe(II)-dependent oxygenase superfamily protein | chr4:9226298-922
0	3	3		AT4G16310.1	AT4G16310.1	AT4G16310.1 | Symbols: LDL3 | LSD1-like 3 | chr4:9218636-9224764 FORWARD LENGTH=1628
3	3	3		AT4G16210.1	AT4G16210.1	AT4G16210.1 | Symbols: ECHIA, E-COAH-2 | enoyl-CoA hydratase/isomerase A | chr4:9176864-9177978 REVERSE LENGTH=265
3	3	3		AT4G16155.1	AT4G16155.1	AT4G16155.1 | Symbols: | dihydrolipoyl dehydrogenases | chr4:9153570-9157322 REVERSE LENGTH=630
0	3	0		AT4G16144.1	AT4G16144.1	AT4G16144.1 | Symbols: AMSH3 | associated molecule with the SH3 domain of STAM 3 | chr4:9138053-9141422 REVERSE LENGTH=507
3	3	3		AT4G16143.2;AT4G16143.1	AT4G16143.2;AT4G16143.1	AT4G16143.2 | Symbols: IMPA-2 | importin alpha isoform 2 | chr4:9134450-9137134 REVERSE LENGTH=535;AT4G16143.1 | Symbols: IMPA-2 | importin alpha isoform 2 | chr4:9134450-9137134 REVERSE LENGTH=535
3	3	3		AT4G16130.1	AT4G16130.1;AT3G42850.1	AT4G16130.1 | Symbols: ARA1, ISA1, ATISA1 | arabinose kinase | chr4:9120875-9127656 FORWARD LENGTH=1039
0	3	1		AT4G15930.1	AT4G15930.1	AT4G15930.1 | Symbols: | Dynein light chain type 1 family protein | chr4:9036344-9037825 FORWARD LENGTH=123
3	3	3		AT4G15900.1	AT4G15900.1	AT4G15900.1 | Symbols: PRL1 | pleiotropic regulatory locus 1 | chr4:9023775-9027443 FORWARD LENGTH=486
3	3	3		AT4G15880.1	AT4G15880.1	AT4G15880.1 | Symbols: ESD4, ATESD4 | Cysteine proteinases superfamily protein | chr4:9012769-9015797 FORWARD LENGTH=489
0	3	3		AT4G15790.1	AT4G15790.1	AT4G15790.1 | Symbols: | unknown protein;INVOLVED IN: biological_process unknown;LOCATED IN: chloroplast;EXPRESSED IN: 21 plant structures;EXPRESSED DURING: 13 growth stages;Has 411 Blast hits to 380 proteins in 121 species: Archae - 4;Bacteria - 10
3	3	3		AT4G15560.1	AT4G15560.1;AT3G21500.1;AT3G21500.2	AT4G15560.1 | Symbols: CLA1, DEF, CLA, DXS, DXPS2 | Deoxyxylulose-5-phosphate synthase | chr4:8884218-8887254 FORWARD LENGTH=717
0	3	0		AT4G15545.1	AT4G15545.1	AT4G15545.1 | Symbols: | unknown protein;BEST Arabidopsis thaliana protein match is: unknown protein (TAIR:AT1G16520.1);Has 30201 Blast hits to 17322 proteins in 780 species: Archae - 12;Bacteria - 1396;Metazoa - 17338;Fungi - 3422;Plants - 5037;Vi
3	3	3		AT4G15530.3;AT4G15530.2;AT4G15530.4;AT4G15530.1;AT4G15530.6;AT4G15530.5	AT4G15530.3;AT4G15530.2;AT4G15530.4;AT4G15530.1;AT4G15530.6;AT4G15530.5	AT4G15530.3 | Symbols: PPDK | pyruvate orthophosphate dikinase | chr4:8864828-8869129 REVERSE LENGTH=857;AT4G15530.2 | Symbols: PPDK | pyruvate orthophosphate dikinase | chr4:8864828-8869183 REVERSE LENGTH=875;AT4G15530.4 | Symbols: PPDK | pyruvate orthoph
3	3	3		AT4G15410.1	AT4G15410.1	AT4G15410.1 | Symbols: PUX5 | serine/threonine protein phosphatase 2A 55 kDa regulatory subunit B prime gamma | chr4:8814868-8816596 FORWARD LENGTH=421
3	3	3		AT4G15180.1	AT4G15180.1	AT4G15180.1 | Symbols: SDG2, ATXR3 | SET domain protein 2 | chr4:8651999-8662178 FORWARD LENGTH=2335
3	3	3		AT4G15020.2;AT4G15020.1	AT4G15020.2;AT4G15020.1	AT4G15020.2 | Symbols: | hAT transposon superfamily | chr4:8575806-8578372 FORWARD LENGTH=768;AT4G15020.1 | Symbols: | hAT transposon superfamily | chr4:8575806-8578372 FORWARD LENGTH=768
3	3	3		AT4G15000.2;AT4G15000.1	AT4G15000.2;AT4G15000.1;AT2G32220.1	AT4G15000.2 | Symbols: | Ribosomal L27e protein family | chr4:8571896-8572387 FORWARD LENGTH=131;AT4G15000.1 | Symbols: | Ribosomal L27e protein family | chr4:8571896-8572303 FORWARD LENGTH=135
3	3	3		AT4G14960.2;AT4G14960.1	AT4G14960.2;AT4G14960.1	AT4G14960.2 | Symbols: TUA6 | Tubulin/FtsZ family protein | chr4:8548769-8550319 REVERSE LENGTH=450;AT4G14960.1 | Symbols: TUA6 | Tubulin/FtsZ family protein | chr4:8548753-8550319 REVERSE LENGTH=427
3	3	3		AT4G14920.1	AT4G14920.1	AT4G14920.1 | Symbols: | Acyl-CoA N-acyltransferase with RING/FYVE/PHD-type zinc finger protein | chr4:8531157-8535842 REVERSE LENGTH=1138
3	3	3		AT4G14880.4;AT4G14880.3;AT4G14880.2;AT4G14880.1	AT4G14880.4;AT4G14880.3;AT4G14880.2;AT4G14880.1;AT3G22460.1	AT4G14880.4 | Symbols: OASA1 | O-acetylserine (thiol) lyase (OAS-TL) isoform A1 | chr4:8518209-8520050 REVERSE LENGTH=322;AT4G14880.3 | Symbols: OASA1 | O-acetylserine (thiol) lyase (OAS-TL) isoform A1 | chr4:8518209-8520050 REVERSE LENGTH=322;AT4G14880.2
3	3	3		AT4G14800.1;AT4G14800.2	AT4G14800.1;AT4G14800.2	AT4G14800.1 | Symbols: PBD2 | 20S proteasome beta subunit D2 | chr4:8500398-8502058 FORWARD LENGTH=199;AT4G14800.2 | Symbols: PBD2 | 20S proteasome beta subunit D2 | chr4:8500398-8502058 FORWARD LENGTH=215
0	0	3		AT4G14480.1	AT4G14480.1	AT4G14480.1 | Symbols: | Protein kinase superfamily protein | chr4:8330081-8331544 REVERSE LENGTH=487
0	3	3		AT4G14465.1	AT4G14465.1	AT4G14465.1 | Symbols: AHL20 | AT-hook motif nuclear-localized protein 20 | chr4:8320972-8321817 FORWARD LENGTH=281
1	3	3		AT4G14385.2;AT4G14385.1;AT4G14385.3	AT4G14385.2;AT4G14385.1;AT4G14385.3	AT4G14385.2 | Symbols: | FUNCTIONS IN: molecular_function unknown;INVOLVED IN: biological_process unknown;LOCATED IN: vacuole;EXPRESSED IN: 24 plant structures;EXPRESSED DURING: 15 growth stages;CONTAINS InterPro DOMAIN/s: Histone H4 acetyltransferas
3	3	3		AT4G14320.1;AT3G23390.1;AT4G14320.2	AT4G14320.1;AT3G23390.1;AT4G14320.2	AT4G14320.1 | Symbols: | Zinc-binding ribosomal protein family protein | chr4:8242684-8243805 REVERSE LENGTH=105;AT3G23390.1 | Symbols: | Zinc-binding ribosomal protein family protein | chr3:8375427-8376224 FORWARD LENGTH=105;AT4G14320.2 | Symbols: | Zi
0	3	1		AT4G14240.2;AT4G14240.1	AT4G14240.2;AT4G14240.1;AT4G14230.1	AT4G14240.2 | Symbols: | CBS domain-containing protein with a domain of unknown function (DUF21) | chr4:8204712-8207273 REVERSE LENGTH=485;AT4G14240.1 | Symbols: | CBS domain-containing protein with a domain of unknown function (DUF21) | chr4:8204712-820
3	3	3		AT4G14160.2;AT4G14160.1;AT4G14160.3	AT4G14160.2;AT4G14160.1;AT4G14160.3;AT2G21630.1	AT4G14160.2 | Symbols: | Sec23/Sec24 protein transport family protein | chr4:8167574-8173026 FORWARD LENGTH=772;AT4G14160.1 | Symbols: | Sec23/Sec24 protein transport family protein | chr4:8167574-8173026 FORWARD LENGTH=773;AT4G14160.3 | Symbols: | Sec2
3	3	3		AT4G14070.1	AT4G14070.1	AT4G14070.1 | Symbols: AAE15 | acyl-activating enzyme 15 | chr4:8112122-8118039 REVERSE LENGTH=727
3	3	3		AT4G14040.1	AT4G14040.1	AT4G14040.1 | Symbols: EDA38, SBP2 | selenium-binding protein 2 | chr4:8100691-8102828 REVERSE LENGTH=487
3	3	3		AT4G14030.2;AT4G14030.1	AT4G14030.2;AT4G14030.1	AT4G14030.2 | Symbols: SBP1 | selenium-binding protein 1 | chr4:8098121-8100165 REVERSE LENGTH=490;AT4G14030.1 | Symbols: SBP1 | selenium-binding protein 1 | chr4:8098121-8100165 REVERSE LENGTH=490
0	3	3		AT4G13970.1	AT4G13970.1	AT4G13970.1 | Symbols: | zinc ion binding | chr4:8070696-8074134 REVERSE LENGTH=778
3	3	3		AT4G13940.1;AT4G13940.3;AT4G13940.2;AT4G13940.4	AT4G13940.1;AT4G13940.3;AT4G13940.2;AT4G13940.4	AT4G13940.1 | Symbols: HOG1, EMB1395, SAHH1, MEE58, ATSAHH1 | S-adenosyl-L-homocysteine hydrolase | chr4:8054931-8056676 FORWARD LENGTH=485;AT4G13940.3 | Symbols: HOG1, SAHH1 | S-adenosyl-L-homocysteine hydrolase | chr4:8054931-8056676 FORWARD LENGTH=440;A
3	3	3		AT4G13930.1	AT4G13930.1;AT4G13890.1	AT4G13930.1 | Symbols: SHM4 | serine hydroxymethyltransferase 4 | chr4:8048013-8050021 REVERSE LENGTH=471
3	3	3		AT4G13780.1	AT4G13780.1	AT4G13780.1 | Symbols: | methionine--tRNA ligase, putative / methionyl-tRNA synthetase, putative / MetRS, putative | chr4:7993366-7998433 REVERSE LENGTH=797
0	3	3		AT4G13730.2;AT4G13730.3;AT4G13730.1	AT4G13730.2;AT4G13730.3;AT4G13730.1	AT4G13730.2 | Symbols: | Ypt/Rab-GAP domain of gyp1p superfamily protein | chr4:7970299-7973901 FORWARD LENGTH=408;AT4G13730.3 | Symbols: | Ypt/Rab-GAP domain of gyp1p superfamily protein | chr4:7970299-7974055 FORWARD LENGTH=438;AT4G13730.1 | Symbols:
3	3	3		AT4G13460.2;AT4G13460.1	AT4G13460.2;AT4G13460.1	AT4G13460.2 | Symbols: SDG22, SUVH9, SET22 | SU(VAR)3-9 homolog 9 | chr4:7824653-7826605 REVERSE LENGTH=650;AT4G13460.1 | Symbols: SDG22, SUVH9, SET22 | SU(VAR)3-9 homolog 9 | chr4:7824653-7826605 REVERSE LENGTH=650
3	3	3		AT4G13430.1	AT4G13430.1	AT4G13430.1 | Symbols: IIL1, ATLEUC1 | isopropyl malate isomerase large subunit 1 | chr4:7804194-7807789 REVERSE LENGTH=509
3	3	3		AT4G13350.2;AT4G13350.1	AT4G13350.2;AT4G13350.1	AT4G13350.2 | Symbols: NIG | NSP (nuclear shuttle protein)-interacting GTPase | chr4:7770170-7773321 REVERSE LENGTH=602;AT4G13350.1 | Symbols: NIG | NSP (nuclear shuttle protein)-interacting GTPase | chr4:7770170-7773321 REVERSE LENGTH=602
3	3	3		AT4G12830.1	AT4G12830.1	AT4G12830.1 | Symbols: | alpha/beta-Hydrolases superfamily protein | chr4:7531189-7533327 FORWARD LENGTH=393
3	3	3		AT4G12800.1	AT4G12800.1	AT4G12800.1 | Symbols: PSAL | photosystem I subunit l | chr4:7521469-7522493 FORWARD LENGTH=219
2	3	3		AT4G12780.2;AT4G12780.1	AT4G12780.2;AT4G12780.1	AT4G12780.2 | Symbols: | Chaperone DnaJ-domain superfamily protein | chr4:7512200-7516655 FORWARD LENGTH=894;AT4G12780.1 | Symbols: | Chaperone DnaJ-domain superfamily protein | chr4:7512200-7516655 FORWARD LENGTH=904
2	3	3		AT4G12770.2;AT4G12770.1	AT4G12770.2;AT4G12770.1	AT4G12770.2 | Symbols: | Chaperone DnaJ-domain superfamily protein | chr4:7506736-7511408 REVERSE LENGTH=889;AT4G12770.1 | Symbols: | Chaperone DnaJ-domain superfamily protein | chr4:7506736-7511408 REVERSE LENGTH=891
0	3	3		AT4G12640.1	AT4G12640.1	AT4G12640.1 | Symbols: | RNA recognition motif (RRM)-containing protein | chr4:7462697-7467630 FORWARD LENGTH=823
0	3	3		AT4G12610.1;AT4G12610.2	AT4G12610.1;AT4G12610.2	AT4G12610.1 | Symbols: RAP74, ATRAP74 | transcription activators;DNA binding;RNA polymerase II transcription factors;catalytics;transcription initiation factors | chr4:7455565-7457465 FORWARD LENGTH=400;AT4G12610.2 | Symbols: RAP74, ATRAP74 | transcription
3	3	3		AT4G12590.1	AT4G12590.1	AT4G12590.1 | Symbols: | Protein of unknown function DUF106, transmembrane | chr4:7451291-7452976 REVERSE LENGTH=246
1	3	3		AT4G12400.2;AT4G12400.1	AT4G12400.2;AT4G12400.1	AT4G12400.2 | Symbols: Hop3 | stress-inducible protein, putative | chr4:7338866-7341239 REVERSE LENGTH=558;AT4G12400.1 | Symbols: Hop3 | stress-inducible protein, putative | chr4:7339024-7341239 REVERSE LENGTH=530
3	3	3		AT4G12390.1	AT4G12390.1	AT4G12390.1 | Symbols: PME1 | pectin methylesterase inhibitor 1 | chr4:7336553-7337173 FORWARD LENGTH=206
1	3	0		AT4G12080.1	AT4G12080.1	AT4G12080.1 | Symbols: AHL1, ATAHL1 | AT-hook motif nuclear-localized protein 1 | chr4:7239466-7241246 FORWARD LENGTH=356
0	3	0		AT4G11860.1	AT4G11860.1	AT4G11860.1 | Symbols: | Protein of unknown function (DUF544) | chr4:7134237-7138361 REVERSE LENGTH=682
3	3	3		AT4G11850.1	AT4G11850.1	AT4G11850.1 | Symbols: PLDGAMMA1, MEE54 | phospholipase D gamma 1 | chr4:7129352-7132937 REVERSE LENGTH=858
3	3	3		AT4G11820.1;AT4G11820.2	AT4G11820.1;AT4G11820.2	AT4G11820.1 | Symbols: MVA1, HMGS, FKP1 | hydroxymethylglutaryl-CoA synthase / HMG-CoA synthase / 3-hydroxy-3-methylglutaryl coenzyme A synthase | chr4:7109124-7111213 REVERSE LENGTH=406;AT4G11820.2 | Symbols: MVA1, FKP1 | hydroxymethylglutaryl-CoA synthas
2	3	3		AT4G11790.1	AT4G11790.1	AT4G11790.1 | Symbols: | Pleckstrin homology (PH) domain superfamily protein | chr4:7090456-7093208 FORWARD LENGTH=443
0	3	3		AT4G11740.1	AT4G11740.1	AT4G11740.1 | Symbols: SAY1 | Ubiquitin-like superfamily protein | chr4:7071955-7075256 FORWARD LENGTH=564
2	3	3		AT4G11660.1	AT4G11660.1;AT3G63350.1;AT5G62020.1;AT1G46264.1;AT3G22830.1;AT5G03720.1;AT2G41690.1;AT3G51910.1;AT5G43840.1;AT4G36990.1;AT5G45710.1;AT2G26150.1;AT4G18880.1	AT4G11660.1 | Symbols: AT-HSFB2B, HSFB2B | winged-helix DNA-binding transcription factor family protein | chr4:7043006-7044227 FORWARD LENGTH=377
3	3	3		AT4G11600.1	AT4G11600.1	AT4G11600.1 | Symbols: ATGPX6, PHGPX, LSC803, GPX6 | glutathione peroxidase 6 | chr4:7010021-7011330 REVERSE LENGTH=232
1	3	3		AT4G11560.1	AT4G11560.1	AT4G11560.1 | Symbols: | bromo-adjacent homology (BAH) domain-containing protein | chr4:7000095-7003445 REVERSE LENGTH=587
3	3	3		AT4G11420.1	AT4G11420.1	AT4G11420.1 | Symbols: EIF3A, ATEIF3A-1, EIF3A-1, ATTIF3A1, TIF3A1 | eukaryotic translation initiation factor 3A | chr4:6947834-6952053 REVERSE LENGTH=987
3	3	3		AT4G11380.1;AT4G11380.2	AT4G11380.1;AT4G11380.2	AT4G11380.1 | Symbols: | Adaptin family protein | chr4:6920608-6925444 FORWARD LENGTH=894;AT4G11380.2 | Symbols: | Adaptin family protein | chr4:6920608-6925444 FORWARD LENGTH=916
3	3	3		AT4G11260.1	AT4G11260.1	AT4G11260.1 | Symbols: ATSGT1B, ETA3, RPR1, EDM1, SGT1B | phosphatase-related | chr4:6851515-6853719 REVERSE LENGTH=358
0	3	0		AT4G10930.1	AT4G10930.1;REV__AT1G51590.2;REV__AT1G51590.1	AT4G10930.1 | Symbols: | unknown protein;LOCATED IN: cellular_component unknown;EXPRESSED IN: 23 plant structures;EXPRESSED DURING: 14 growth stages;Has 30201 Blast hits to 17322 proteins in 780 species: Archae - 12;Bacteria - 1396;Metazoa - 17338;
0	3	2		AT4G10920.2;AT4G10920.1	AT4G10920.2;AT4G10920.1	AT4G10920.2 | Symbols: KELP | transcriptional coactivator p15 (PC4) family protein (KELP) | chr4:6697894-6699103 REVERSE LENGTH=165;AT4G10920.1 | Symbols: KELP | transcriptional coactivator p15 (PC4) family protein (KELP) | chr4:6697894-6699103 REVERSE LEN
3	3	3		AT4G10840.1;AT4G10840.2	AT4G10840.1;AT4G10840.2;AT1G27500.1	AT4G10840.1 | Symbols: | Tetratricopeptide repeat (TPR)-like superfamily protein | chr4:6656614-6659033 FORWARD LENGTH=609;AT4G10840.2 | Symbols: | Tetratricopeptide repeat (TPR)-like superfamily protein | chr4:6656614-6658702 FORWARD LENGTH=531
3	3	3		AT4G10790.1	AT4G10790.1	AT4G10790.1 | Symbols: | UBX domain-containing protein | chr4:6640752-6643035 REVERSE LENGTH=480
3	3	3		AT4G10760.1	AT4G10760.1	AT4G10760.1 | Symbols: EMB1706, MTA | mRNAadenosine methylase | chr4:6619947-6623312 REVERSE LENGTH=685
3	3	3		AT4G10750.1	AT4G10750.1	AT4G10750.1 | Symbols: | Phosphoenolpyruvate carboxylase family protein | chr4:6618724-6619800 FORWARD LENGTH=358
3	3	3		AT4G10710.1	AT4G10710.1;AT4G10670.1	AT4G10710.1 | Symbols: SPT16 | global transcription factor C | chr4:6602226-6605450 REVERSE LENGTH=1074
3	3	3		AT4G10480.1;AT4G10480.2	AT4G10480.1;AT4G10480.2	AT4G10480.1 | Symbols: | Nascent polypeptide-associated complex (NAC), alpha subunit family protein | chr4:6478089-6479079 REVERSE LENGTH=212;AT4G10480.2 | Symbols: | Nascent polypeptide-associated complex (NAC), alpha subunit family protein | chr4:64780
3	3	3		AT4G10450.1	AT4G10450.1	AT4G10450.1 | Symbols: | Ribosomal protein L6 family | chr4:6463201-6464458 REVERSE LENGTH=194
3	3	3		AT4G10340.1	AT4G10340.1	AT4G10340.1 | Symbols: LHCB5 | light harvesting complex of photosystem II 5 | chr4:6408200-6409496 FORWARD LENGTH=280
3	3	3		AT4G10320.1	AT4G10320.1;AT3G23145.1	AT4G10320.1 | Symbols: | tRNA synthetase class I (I, L, M and V) family protein | chr4:6397526-6404509 REVERSE LENGTH=1190
1	3	2		AT4G10180.1	AT4G10180.1	AT4G10180.1 | Symbols: DET1, FUS2, ATDET1 | light-mediated development protein 1 / deetiolated1 (DET1) | chr4:6346543-6349146 FORWARD LENGTH=543
3	3	3		AT4G10120.2;AT4G10120.1	AT4G10120.2;AT4G10120.1	AT4G10120.2 | Symbols: ATSPS4F | Sucrose-phosphate synthase family protein | chr4:6315033-6319785 FORWARD LENGTH=1050;AT4G10120.1 | Symbols: ATSPS4F | Sucrose-phosphate synthase family protein | chr4:6315033-6319785 FORWARD LENGTH=1050
3	3	3		AT4G10070.1	AT4G10070.1	AT4G10070.1 | Symbols: | KH domain-containing protein | chr4:6295608-6299759 REVERSE LENGTH=725
1	3	3		AT4G10040.1;AT1G22840.1;AT1G22840.2	AT4G10040.1;AT1G22840.1;AT1G22840.2	AT4G10040.1 | Symbols: CYTC-2 | cytochrome c-2 | chr4:6277083-6278281 FORWARD LENGTH=112;AT1G22840.1 | Symbols: CYTC-1, ATCYTC-A | CYTOCHROME C-1 | chr1:8079384-8080286 FORWARD LENGTH=114;AT1G22840.2 | Symbols: CYTC-1, ATCYTC-A | CYTOCHROME C-1 | chr1:8079
3	3	3		AT4G09980.1;AT4G09980.2	AT4G09980.1;AT4G09980.2	AT4G09980.1 | Symbols: EMB1691 | Methyltransferase MT-A70 family protein | chr4:6247978-6252030 REVERSE LENGTH=963;AT4G09980.2 | Symbols: EMB1691 | Methyltransferase MT-A70 family protein | chr4:6249111-6252030 REVERSE LENGTH=775
3	3	3		AT4G09800.1;AT1G34030.1;AT1G22780.1	AT4G09800.1;AT1G34030.1;AT1G22780.1	AT4G09800.1 | Symbols: RPS18C | S18 ribosomal protein | chr4:6173818-6174963 FORWARD LENGTH=152;AT1G34030.1 | Symbols: | Ribosomal protein S13/S18 family | chr1:12370285-12371465 REVERSE LENGTH=152;AT1G22780.1 | Symbols: PFL, RPS18A, PFL1 | Ribosomal prot
3	3	3		AT4G09730.1	AT4G09730.1	AT4G09730.1 | Symbols: RH39 | RH39 | chr4:6136333-6139510 FORWARD LENGTH=621
3	3	3		AT4G09650.1	AT4G09650.1	AT4G09650.1 | Symbols: ATPD | ATP synthase delta-subunit gene | chr4:6100799-6101503 FORWARD LENGTH=234
0	3	0		AT4G09420.1	AT4G09420.1	AT4G09420.1 | Symbols: | Disease resistance protein (TIR-NBS class) | chr4:5962319-5963776 REVERSE LENGTH=457
3	3	3		AT4G09320.1	AT4G09320.1	AT4G09320.1 | Symbols: NDPK1 | Nucleoside diphosphate kinase family protein | chr4:5923424-5924366 FORWARD LENGTH=169
3	3	3		AT4G09040.2;AT4G09040.1	AT4G09040.2;AT4G09040.1	AT4G09040.2 | Symbols: | RNA-binding (RRM/RBD/RNP motifs) family protein | chr4:5795075-5797193 REVERSE LENGTH=244;AT4G09040.1 | Symbols: | RNA-binding (RRM/RBD/RNP motifs) family protein | chr4:5795075-5797315 REVERSE LENGTH=304
3	3	3		AT4G09000.1;AT4G09000.2	AT4G09000.1;AT4G09000.2	AT4G09000.1 | Symbols: GRF1, GF14 CHI | general regulatory factor 1 | chr4:5775387-5777157 FORWARD LENGTH=267;AT4G09000.2 | Symbols: GRF1, GF14 CHI | general regulatory factor 1 | chr4:5775387-5777157 FORWARD LENGTH=318
3	3	3		AT4G08950.1	AT4G08950.1	AT4G08950.1 | Symbols: EXO | Phosphate-responsive 1 family protein | chr4:5740378-5741322 FORWARD LENGTH=314
1	3	3		AT4G08580.1	AT4G08580.1	AT4G08580.1 | Symbols: | microfibrillar-associated protein-related | chr4:5462190-5463718 FORWARD LENGTH=435
0	3	3		AT4G08540.1	AT4G08540.1	AT4G08540.1 | Symbols: | DNA-directed RNA polymerase II protein | chr4:5433760-5436326 FORWARD LENGTH=473
3	3	3		AT4G08350.1	AT4G08350.1;AT2G34210.1;AT4G08360.1	AT4G08350.1 | Symbols: GTA02, GTA2 | global transcription factor group A2 | chr4:5286351-5292072 FORWARD LENGTH=1041
2	3	2		AT4G08310.1	AT4G08310.1;AT1G44780.2;AT1G44780.1	AT4G08310.1 | Symbols: | FUNCTIONS IN: molecular_function unknown;INVOLVED IN: biological_process unknown;LOCATED IN: cellular_component unknown;EXPRESSED IN: 25 plant structures;EXPRESSED DURING: 13 growth stages;CONTAINS InterPro DOMAIN/s: Histone
0	3	0		AT4G08180.3;AT4G08180.2;AT4G08180.1	AT4G08180.3;AT4G08180.2;AT4G08180.1	AT4G08180.3 | Symbols: ORP1C | OSBP(oxysterol binding protein)-related protein 1C | chr4:5169727-5173360 FORWARD LENGTH=813;AT4G08180.2 | Symbols: ORP1C | OSBP(oxysterol binding protein)-related protein 1C | chr4:5169727-5173360 FORWARD LENGTH=813;AT4G0818
3	3	3		AT4G07410.1;AT4G07410.2	AT4G07410.1;AT4G07410.2;AT1G27470.1	AT4G07410.1 | Symbols: | Transducin family protein / WD-40 repeat family protein | chr4:4201465-4205136 REVERSE LENGTH=815;AT4G07410.2 | Symbols: | Transducin family protein / WD-40 repeat family protein | chr4:4201465-4204576 REVERSE LENGTH=702
3	3	3		AT4G06634.1;AT4G06634.2;AT4G06634.3	AT4G06634.1;AT4G06634.2;AT4G06634.3	AT4G06634.1 | Symbols: | zinc finger (C2H2 type) family protein | chr4:3764499-3766439 REVERSE LENGTH=387;AT4G06634.2 | Symbols: | zinc finger (C2H2 type) family protein | chr4:3764499-3766177 REVERSE LENGTH=349;AT4G06634.3 | Symbols: | zinc finger (C2H
1	3	3		AT4G05420.2;AT4G05420.1;AT4G21100.1	AT4G05420.2;AT4G05420.1;AT4G21100.1	AT4G05420.2 | Symbols: DDB1A | damaged DNA binding protein 1A | chr4:2746288-2752663 FORWARD LENGTH=1067;AT4G05420.1 | Symbols: DDB1A | damaged DNA binding protein 1A | chr4:2746288-2752663 FORWARD LENGTH=1088;AT4G21100.1 | Symbols: DDB1B | damaged DNA bin
3	3	3		AT4G05180.1	AT4G05180.1	AT4G05180.1 | Symbols: PSBQ, PSBQ-2, PSII-Q | photosystem II subunit Q-2 | chr4:2672093-2673170 REVERSE LENGTH=230
3	3	3		AT4G04940.1	AT4G04940.1	AT4G04940.1 | Symbols: | transducin family protein / WD-40 repeat family protein | chr4:2511212-2517052 REVERSE LENGTH=910
1	3	3		AT4G04920.2;AT4G04920.1	AT4G04920.2;AT4G04920.1	AT4G04920.2 | Symbols: SFR6 | sensitive to freezing 6 | chr4:2497931-2504996 FORWARD LENGTH=1267;AT4G04920.1 | Symbols: SFR6 | sensitive to freezing 6 | chr4:2497931-2504996 FORWARD LENGTH=1278
3	3	3		AT4G04910.1	AT4G04910.1	AT4G04910.1 | Symbols: NSF | AAA-type ATPase family protein | chr4:2489696-2495666 REVERSE LENGTH=742
2	3	3		AT4G04885.1	AT4G04885.1	AT4G04885.1 | Symbols: PCFS4 | PCF11P-similar protein 4 | chr4:2472083-2475417 FORWARD LENGTH=808
3	3	3		AT4G04640.1	AT4G04640.1	AT4G04640.1 | Symbols: ATPC1 | ATPase, F1 complex, gamma subunit protein | chr4:2350761-2351882 REVERSE LENGTH=373
0	3	3		AT4G04614.1	AT4G04614.1	AT4G04614.1 | Symbols: | unknown protein;Has 35333 Blast hits to 34131 proteins in 2444 species: Archae - 798;Bacteria - 22429;Metazoa - 974;Fungi - 991;Plants - 531;Viruses - 0;Other Eukaryotes - 9610 (source: NCBI BLink). | chr4:2327308-2327914 R
3	3	3		AT4G04460.2;AT4G04460.1	AT4G04460.2;AT4G04460.1	AT4G04460.2 | Symbols: | Saposin-like aspartyl protease family protein | chr4:2225232-2227746 FORWARD LENGTH=504;AT4G04460.1 | Symbols: | Saposin-like aspartyl protease family protein | chr4:2225232-2227746 FORWARD LENGTH=508
0	3	3		AT4G04210.1	AT4G04210.1	AT4G04210.1 | Symbols: PUX4 | plant UBX domain containing protein 4 | chr4:2030391-2031670 FORWARD LENGTH=303
3	3	3		AT4G04040.1	AT4G04040.1	AT4G04040.1 | Symbols: MEE51 | Phosphofructokinase family protein | chr4:1939250-1942765 FORWARD LENGTH=569
3	1	3		AT4G03550.1	AT4G03550.1;AT4G04970.1	AT4G03550.1 | Symbols: ATGSL05, GSL05, ATGSL5, PMR4, GSL5 | glucan synthase-like 5 | chr4:1573513-1579195 FORWARD LENGTH=1780
3	3	3		AT4G03430.1	AT4G03430.1	AT4G03430.1 | Symbols: STA1, EMB2770 | pre-mRNA splicing factor-related | chr4:1517411-1520500 REVERSE LENGTH=1029
3	3	3		AT4G03280.2;AT4G03280.1	AT4G03280.2;AT4G03280.1	AT4G03280.2 | Symbols: PETC, PGR1 | photosynthetic electron transfer C | chr4:1440462-1441717 FORWARD LENGTH=210;AT4G03280.1 | Symbols: PETC, PGR1 | photosynthetic electron transfer C | chr4:1440314-1441717 FORWARD LENGTH=229
0	3	3		AT4G03250.1	AT4G03250.1	AT4G03250.1 | Symbols: | Homeodomain-like superfamily protein | chr4:1425050-1427744 FORWARD LENGTH=507
3	3	3		AT4G03190.1	AT4G03190.1	AT4G03190.1 | Symbols: GRH1, ATGRH1, AFB1 | GRR1-like protein 1 | chr4:1405108-1407057 REVERSE LENGTH=585
3	3	3		AT4G03080.1	AT4G03080.1	AT4G03080.1 | Symbols: BSL1 | BRI1 suppressor 1 (BSU1)-like 1 | chr4:1359935-1365166 REVERSE LENGTH=881
3	3	3		AT4G03020.2;AT4G03020.1	AT4G03020.2;AT4G03020.1	AT4G03020.2 | Symbols: | transducin family protein / WD-40 repeat family protein | chr4:1331704-1334472 REVERSE LENGTH=493;AT4G03020.1 | Symbols: | transducin family protein / WD-40 repeat family protein | chr4:1331704-1334472 REVERSE LENGTH=493
2	3	3		AT4G03000.2;AT4G03000.1	AT4G03000.2;AT4G03000.1	AT4G03000.2 | Symbols: | RING/U-box superfamily protein | chr4:1324602-1327348 FORWARD LENGTH=814;AT4G03000.1 | Symbols: | RING/U-box superfamily protein | chr4:1324602-1327348 FORWARD LENGTH=814
3	3	3		AT4G02930.1	AT4G02930.1	AT4G02930.1 | Symbols: | GTP binding Elongation factor Tu family protein | chr4:1295751-1298354 REVERSE LENGTH=454
3	3	3		AT4G02840.1;AT4G02840.2	AT4G02840.1;AT4G02840.2	AT4G02840.1 | Symbols: | Small nuclear ribonucleoprotein family protein | chr4:1264726-1266253 FORWARD LENGTH=116;AT4G02840.2 | Symbols: | Small nuclear ribonucleoprotein family protein | chr4:1264726-1266253 FORWARD LENGTH=126
3	3	3		AT4G02720.1	AT4G02720.1	AT4G02720.1 | Symbols: | unknown protein;FUNCTIONS IN: molecular_function unknown;INVOLVED IN: biological_process unknown;EXPRESSED IN: 25 plant structures;EXPRESSED DURING: 14 growth stages;CONTAINS InterPro DOMAIN/s: Protein of unknown function DUF
2	3	1		AT4G02590.3;AT4G02590.2;AT4G02590.1	AT4G02590.3;AT4G02590.2;AT4G02590.1	AT4G02590.3 | Symbols: UNE12 | basic helix-loop-helix (bHLH) DNA-binding superfamily protein | chr4:1137968-1140117 REVERSE LENGTH=247;AT4G02590.2 | Symbols: UNE12 | basic helix-loop-helix (bHLH) DNA-binding superfamily protein | chr4:1137968-1140306 REVER
0	3	3		AT4G02560.2;AT4G02560.1	AT4G02560.2;AT4G02560.1	AT4G02560.2 | Symbols: LD | Homeodomain-like superfamily protein | chr4:1123656-1128252 REVERSE LENGTH=953;AT4G02560.1 | Symbols: LD | Homeodomain-like superfamily protein | chr4:1123656-1128252 REVERSE LENGTH=953
3	3	3		AT4G02520.1	AT4G02520.1;AT2G02930.1	AT4G02520.1 | Symbols: ATGSTF2, ATPM24.1, ATPM24, GST2, GSTF2 | glutathione S-transferase PHI 2 | chr4:1110673-1111531 REVERSE LENGTH=212
3	3	3		AT4G02510.1	AT4G02510.1	AT4G02510.1 | Symbols: TOC159, TOC86, PPI2, TOC160, ATTOC159 | translocon at the outer envelope membrane of chloroplasts 159 | chr4:1104766-1109360 FORWARD LENGTH=1503
3	3	3		AT4G02480.1	AT4G02480.1;AT4G24860.1	AT4G02480.1 | Symbols: | AAA-type ATPase family protein | chr4:1082082-1088680 REVERSE LENGTH=1265
3	3	3		AT4G02450.2;AT4G02450.1	AT4G02450.2;AT4G02450.1	AT4G02450.2 | Symbols: | HSP20-like chaperones superfamily protein | chr4:1073987-1075765 REVERSE LENGTH=240;AT4G02450.1 | Symbols: | HSP20-like chaperones superfamily protein | chr4:1073987-1075765 REVERSE LENGTH=241
1	3	1		AT4G02400.1	AT4G02400.1	AT4G02400.1 | Symbols: | U3 ribonucleoprotein (Utp) family protein | chr4:1054243-1057884 FORWARD LENGTH=855
2	3	3		AT4G02390.1	AT4G02390.1	AT4G02390.1 | Symbols: APP, PARP1, ATPARP1, PP | poly(ADP-ribose) polymerase | chr4:1050104-1053960 FORWARD LENGTH=637
3	3	3		AT4G02230.1	AT4G02230.1	AT4G02230.1 | Symbols: | Ribosomal protein L19e family protein | chr4:979391-980640 REVERSE LENGTH=208
0	3	0		AT4G02220.1	AT4G02220.1	AT4G02220.1 | Symbols: | zinc finger (MYND type) family protein / programmed cell death 2 C-terminal domain-containing protein | chr4:976728-978902 FORWARD LENGTH=418
2	3	3		AT4G02150.1	AT4G02150.1	AT4G02150.1 | Symbols: MOS6, ATIMPALPHA3, IMPA-3 | ARM repeat superfamily protein | chr4:950884-953602 REVERSE LENGTH=531
3	3	3		AT4G02020.1	AT4G02020.1	AT4G02020.1 | Symbols: EZA1, SWN, SDG10 | SET domain-containing protein | chr4:886693-891743 FORWARD LENGTH=856
3	2	3		AT4G01900.1	AT4G01900.1	AT4G01900.1 | Symbols: PII, GLB1 | GLNB1 homolog | chr4:821736-823294 FORWARD LENGTH=196
3	3	3		AT4G01850.2;AT4G01850.1	AT4G01850.2;AT4G01850.1	AT4G01850.2 | Symbols: SAM-2, MAT2, SAM2, AtSAM2 | S-adenosylmethionine synthetase 2 | chr4:796298-797479 REVERSE LENGTH=393;AT4G01850.1 | Symbols: SAM-2, MAT2, SAM2, AtSAM2 | S-adenosylmethionine synthetase 2 | chr4:796298-797479 REVERSE LENGTH=393
3	3	3		AT4G01810.1	AT4G01810.1	AT4G01810.1 | Symbols: | Sec23/Sec24 protein transport family protein | chr4:776734-779802 REVERSE LENGTH=880
3	3	3		AT4G01800.1;AT4G01800.2	AT4G01800.1;AT4G01800.2	AT4G01800.1 | Symbols: AGY1, AtcpSecA, SECA1 | Albino or Glassy Yellow 1 | chr4:770926-776131 REVERSE LENGTH=1022;AT4G01800.2 | Symbols: AGY1, SECA1 | Albino or Glassy Yellow 1 | chr4:770926-776134 REVERSE LENGTH=1042
3	1	2		AT4G01700.1	AT4G01700.1	AT4G01700.1 | Symbols: | Chitinase family protein | chr4:732413-733487 REVERSE LENGTH=280
3	3	3		AT4G01690.1;AT4G01690.2	AT4G01690.1;AT4G01690.2	AT4G01690.1 | Symbols: PPOX, HEMG1, PPO1 | Flavin containing amine oxidoreductase family | chr4:729929-732309 FORWARD LENGTH=537;AT4G01690.2 | Symbols: PPOX | Flavin containing amine oxidoreductase family | chr4:729929-732309 FORWARD LENGTH=506
2	1	3		AT4G01610.2;AT4G01610.1	AT4G01610.2;AT4G01610.1	AT4G01610.2 | Symbols: | Cysteine proteinases superfamily protein | chr4:694857-696937 FORWARD LENGTH=359;AT4G01610.1 | Symbols: | Cysteine proteinases superfamily protein | chr4:694857-696937 FORWARD LENGTH=359
3	3	3		AT4G01370.1;AT1G01560.2	AT4G01370.1;AT1G01560.2;AT2G46070.2;AT2G46070.1	AT4G01370.1 | Symbols: ATMPK4, MPK4 | MAP kinase 4 | chr4:567219-568889 FORWARD LENGTH=376;AT1G01560.2 | Symbols: ATMPK11, MPK11 | MAP kinase 11 | chr1:202345-204189 FORWARD LENGTH=369
3	3	3		AT4G01310.1	AT4G01310.1	AT4G01310.1 | Symbols: | Ribosomal L5P family protein | chr4:544166-545480 REVERSE LENGTH=262
3	3	3		AT4G01290.2;AT4G01290.1	AT4G01290.2;AT4G01290.1	AT4G01290.2 | Symbols: | unknown protein;FUNCTIONS IN: molecular_function unknown;INVOLVED IN: biological_process unknown;LOCATED IN: cellular_component unknown;EXPRESSED IN: 24 plant structures;EXPRESSED DURING: 15 growth stages;Has 1797 Blast hits
3	3	3		AT4G01100.1;AT4G01100.2	AT4G01100.1;AT4G01100.2	AT4G01100.1 | Symbols: ADNT1 | adenine nucleotide transporter 1 | chr4:477411-479590 FORWARD LENGTH=352;AT4G01100.2 | Symbols: ADNT1 | adenine nucleotide transporter 1 | chr4:477411-479590 FORWARD LENGTH=366
1	3	3		AT4G01000.1	AT4G01000.1	AT4G01000.1 | Symbols: | Ubiquitin-like superfamily protein | chr4:432186-433727 REVERSE LENGTH=415
1	3	3		AT4G00990.1	AT4G00990.1	AT4G00990.1 | Symbols: | Transcription factor jumonji (jmjC) domain-containing protein | chr4:427035-431535 FORWARD LENGTH=840
0	3	0		AT4G00930.1	AT4G00930.1	AT4G00930.1 | Symbols: CIP4.1 | COP1-interacting protein 4.1 | chr4:396558-400734 FORWARD LENGTH=1133
2	3	2		AT4G00830.4;AT4G00830.2;AT4G00830.1;AT4G00830.3	AT4G00830.4;AT4G00830.2;AT4G00830.1;AT4G00830.3	AT4G00830.4 | Symbols: | RNA-binding (RRM/RBD/RNP motifs) family protein | chr4:352782-354965 FORWARD LENGTH=495;AT4G00830.2 | Symbols: | RNA-binding (RRM/RBD/RNP motifs) family protein | chr4:352782-354965 FORWARD LENGTH=495;AT4G00830.1 | Symbols: | RN
0	3	1		AT4G00752.1	AT4G00752.1	AT4G00752.1 | Symbols: | UBX domain-containing protein | chr4:317771-320793 REVERSE LENGTH=469
3	3	3		AT4G00660.2;AT4G00660.1	AT4G00660.2;AT4G00660.1	AT4G00660.2 | Symbols: RH8, ATRH8 | RNAhelicase-like 8 | chr4:274638-277438 FORWARD LENGTH=505;AT4G00660.1 | Symbols: RH8, ATRH8 | RNAhelicase-like 8 | chr4:274638-277438 FORWARD LENGTH=505
3	3	3		AT4G00620.1	AT4G00620.1;AT4G00600.1	AT4G00620.1 | Symbols: | Amino acid dehydrogenase family protein | chr4:259265-260788 REVERSE LENGTH=360
3	3	3		AT4G00570.1	AT4G00570.1	AT4G00570.1 | Symbols: NAD-ME2 | NAD-dependent malic enzyme 2 | chr4:242817-246522 REVERSE LENGTH=607
3	3	3		AT4G00450.1	AT4G00450.1	AT4G00450.1 | Symbols: CRP, CCT | RNA polymerase II transcription mediators | chr4:202425-210666 FORWARD LENGTH=2253
3	3	3		AT4G00430.1;AT4G00430.2	AT4G00430.1;AT4G00430.2	AT4G00430.1 | Symbols: TMP-C, PIP1;4, PIP1E | plasma membrane intrinsic protein 1;4 | chr4:186143-187531 REVERSE LENGTH=287;AT4G00430.2 | Symbols: TMP-C, PIP1;4, PIP1E | plasma membrane intrinsic protein 1;4 | chr4:186569-187531 REVERSE LENGTH=219
1	3	0		AT4G00420.3;AT4G00420.1;AT4G00420.2	AT4G00420.3;AT4G00420.1;AT4G00420.2	AT4G00420.3 | Symbols: | Double-stranded RNA-binding domain (DsRBD)-containing protein | chr4:181518-182408 REVERSE LENGTH=168;AT4G00420.1 | Symbols: | Double-stranded RNA-binding domain (DsRBD)-containing protein | chr4:181518-182629 REVERSE LENGTH=189;
3	3	3		AT4G00360.1	AT4G00360.1;AT2G45970.1;AT1G63710.1;AT1G01600.1;AT5G58860.1	AT4G00360.1 | Symbols: CYP86A2, ATT1 | cytochrome P450, family 86, subfamily A, polypeptide 2 | chr4:160951-162778 FORWARD LENGTH=553
3	3	3		AT4G00270.1	AT4G00270.1;AT5G14280.1	AT4G00270.1 | Symbols: | DNA-binding storekeeper protein-related transcriptional regulator | chr4:117477-118468 REVERSE LENGTH=302
3	3	3		AT4G00250.1	AT4G00250.1	AT4G00250.1 | Symbols: | DNA-binding storekeeper protein-related transcriptional regulator | chr4:112951-113910 REVERSE LENGTH=319
3	3	3		AT4G00238.1	AT4G00238.1;AT1G11510.1	AT4G00238.1 | Symbols: | DNA-binding storekeeper protein-related transcriptional regulator | chr4:104092-105129 REVERSE LENGTH=345
0	3	1		AT4G00231.1	AT4G00231.1	AT4G00231.1 | Symbols: MEE50 | ARM repeat superfamily protein | chr4:97528-99050 FORWARD LENGTH=475
3	3	3		AT3G63500.2;AT3G63500.1	AT3G63500.2;AT3G63500.1	AT3G63500.2 | Symbols: | Protein of unknown function (DUF1423) | chr3:23446331-23449991 REVERSE LENGTH=1162;AT3G63500.1 | Symbols: | Protein of unknown function (DUF1423) | chr3:23446331-23449166 REVERSE LENGTH=887
3	3	3		AT3G63490.1;AT3G63490.2	AT3G63490.1;AT3G63490.2	AT3G63490.1 | Symbols: | Ribosomal protein L1p/L10e family | chr3:23444269-23446020 FORWARD LENGTH=346;AT3G63490.2 | Symbols: | Ribosomal protein L1p/L10e family | chr3:23444269-23445777 FORWARD LENGTH=291
3	3	3		AT3G63460.1;AT3G63460.2;AT3G63460.3	AT3G63460.1;AT3G63460.2;AT3G63460.3	AT3G63460.1 | Symbols: | transducin family protein / WD-40 repeat family protein | chr3:23431009-23437241 REVERSE LENGTH=1104;AT3G63460.2 | Symbols: | transducin family protein / WD-40 repeat family protein | chr3:23431009-23437241 REVERSE LENGTH=1102;AT
3	3	3		AT3G63410.1	AT3G63410.1	AT3G63410.1 | Symbols: APG1, VTE3, IEP37, E37 | S-adenosyl-L-methionine-dependent methyltransferases superfamily protein | chr3:23415816-23417002 REVERSE LENGTH=338
3	3	3		AT3G63400.3;AT3G63400.1;AT3G63400.2	AT3G63400.3;AT3G63400.1;AT3G63400.2	AT3G63400.3 | Symbols: | Cyclophilin-like peptidyl-prolyl cis-trans isomerase family protein | chr3:23412449-23415435 FORWARD LENGTH=570;AT3G63400.1 | Symbols: | Cyclophilin-like peptidyl-prolyl cis-trans isomerase family protein | chr3:23412449-23415435
3	3	3		AT3G63260.1;AT3G63260.2	AT3G63260.1;AT3G63260.2;AT4G23240.1	AT3G63260.1 | Symbols: ATMRK1 | Protein kinase superfamily protein | chr3:23373090-23374747 REVERSE LENGTH=391;AT3G63260.2 | Symbols: ATMRK1 | Protein kinase superfamily protein | chr3:23373327-23374747 REVERSE LENGTH=344
3	3	3		AT3G63170.1	AT3G63170.1	AT3G63170.1 | Symbols: | Chalcone-flavanone isomerase family protein | chr3:23334675-23335993 FORWARD LENGTH=279
3	3	3		AT3G63140.1	AT3G63140.1	AT3G63140.1 | Symbols: CSP41A | chloroplast stem-loop binding protein of 41 kDa | chr3:23327006-23328620 REVERSE LENGTH=406
0	3	1		AT3G63130.2;AT3G63130.1	AT3G63130.2;AT3G63130.1	AT3G63130.2 | Symbols: RANGAP1 | RAN GTPase activating protein 1 | chr3:23325108-23326715 FORWARD LENGTH=535;AT3G63130.1 | Symbols: RANGAP1, ATRANGAP1 | RAN GTPase activating protein 1 | chr3:23325108-23326715 FORWARD LENGTH=535
3	3	3		AT3G62910.1	AT3G62910.1	AT3G62910.1 | Symbols: APG3 | Peptide chain release factor 1 | chr3:23257661-23260386 REVERSE LENGTH=422
1	3	1		AT3G62900.1	AT3G62900.1	AT3G62900.1 | Symbols: | CW-type Zinc Finger | chr3:23248868-23254810 REVERSE LENGTH=1465
3	3	3		AT3G62870.1	AT3G62870.1	AT3G62870.1 | Symbols: | Ribosomal protein L7Ae/L30e/S12e/Gadd45 family protein | chr3:23242862-23244273 REVERSE LENGTH=256
3	3	3		AT3G62840.1;AT2G47640.4;AT2G47640.1;AT3G62840.2;AT2G47640.3;AT2G47640.2	AT3G62840.1;AT2G47640.4;AT2G47640.1;AT3G62840.2;AT2G47640.3;AT2G47640.2	AT3G62840.1 | Symbols: | Small nuclear ribonucleoprotein family protein | chr3:23235727-23236615 REVERSE LENGTH=109;AT2G47640.4 | Symbols: | Small nuclear ribonucleoprotein family protein | chr2:19537393-19538431 FORWARD LENGTH=109;AT2G47640.1 | Symbols:
3	3	3		AT3G62830.2;AT3G62830.1	AT3G62830.2;AT3G62830.1	AT3G62830.2 | Symbols: UXS2, ATUXS2 | NAD(P)-binding Rossmann-fold superfamily protein | chr3:23232539-23235353 FORWARD LENGTH=445;AT3G62830.1 | Symbols: UXS2, ATUXS2, AUD1 | NAD(P)-binding Rossmann-fold superfamily protein | chr3:23232539-23235353 FORWARD
0	3	2		AT3G62800.2;AT3G62800.1;AT3G62800.3	AT3G62800.2;AT3G62800.1;AT3G62800.3	AT3G62800.2 | Symbols: DRB4 | double-stranded-RNA-binding protein 4 | chr3:23225749-23227163 REVERSE LENGTH=355;AT3G62800.1 | Symbols: DRB4 | double-stranded-RNA-binding protein 4 | chr3:23225749-23227163 REVERSE LENGTH=355;AT3G62800.3 | Symbols: | double
1	3	2		AT3G62770.1;AT3G62770.3	AT3G62770.1;AT3G62770.3	AT3G62770.1 | Symbols: AtATG18a | Transducin/WD40 repeat-like superfamily protein | chr3:23218858-23221110 REVERSE LENGTH=425;AT3G62770.3 | Symbols: AtATG18a | Transducin/WD40 repeat-like superfamily protein | chr3:23219091-23221110 REVERSE LENGTH=396
3	3	3		AT3G62730.1	AT3G62730.1	AT3G62730.1 | Symbols: | unknown protein;FUNCTIONS IN: molecular_function unknown;INVOLVED IN: biological_process unknown;LOCATED IN: endomembrane system;EXPRESSED IN: 13 plant structures;EXPRESSED DURING: LP.04 four leaves visible, 4 anthesis, LP.02
3	3	3		AT3G62530.1	AT3G62530.1	AT3G62530.1 | Symbols: | ARM repeat superfamily protein | chr3:23132219-23133121 FORWARD LENGTH=221
3	3	3		AT3G62330.1	AT3G62330.1	AT3G62330.1 | Symbols: | Zinc knuckle (CCHC-type) family protein | chr3:23063329-23065419 REVERSE LENGTH=479
3	3	3		AT3G62310.1	AT3G62310.1	AT3G62310.1 | Symbols: | RNA helicase family protein | chr3:23057516-23060561 REVERSE LENGTH=726
0	3	1		AT3G62300.1;AT3G62300.2	AT3G62300.1;AT3G62300.2	AT3G62300.1 | Symbols: DUF7, ATDUF7 | DOMAIN OF UNKNOWN FUNCTION 724 7 | chr3:23054247-23057081 FORWARD LENGTH=722;AT3G62300.2 | Symbols: DUF7 | DOMAIN OF UNKNOWN FUNCTION 724 7 | chr3:23054247-23057081 FORWARD LENGTH=723
3	3	3		AT3G62250.1	AT3G62250.1	AT3G62250.1 | Symbols: UBQ5 | ubiquitin 5 | chr3:23037138-23037611 FORWARD LENGTH=157
0	3	3		AT3G62140.1	AT3G62140.1	AT3G62140.1 | Symbols: | CONTAINS InterPro DOMAIN/s: NEFA-interacting nuclear protein NIP30, N-terminal (InterPro:IPR019331);Has 398 Blast hits to 395 proteins in 139 species: Archae - 0;Bacteria - 6;Metazoa - 193;Fungi - 83;Plants - 36;Viruses - 0;
1	3	3		AT3G62130.1	AT3G62130.1	AT3G62130.1 | Symbols: | Pyridoxal phosphate (PLP)-dependent transferases superfamily protein | chr3:23004994-23006358 FORWARD LENGTH=454
3	3	3		AT3G62120.2;AT3G62120.1	AT3G62120.2;AT3G62120.1	AT3G62120.2 | Symbols: | Class II aaRS and biotin synthetases superfamily protein | chr3:23001227-23003849 REVERSE LENGTH=530;AT3G62120.1 | Symbols: | Class II aaRS and biotin synthetases superfamily protein | chr3:23001227-23003849 REVERSE LENGTH=530
3	3	3		AT3G62030.3;AT3G62030.1;AT3G62030.2	AT3G62030.3;AT3G62030.1;AT3G62030.2	AT3G62030.3 | Symbols: ROC4 | rotamase CYP 4 | chr3:22973708-22975139 FORWARD LENGTH=259;AT3G62030.1 | Symbols: ROC4 | rotamase CYP 4 | chr3:22973708-22975139 FORWARD LENGTH=260;AT3G62030.2 | Symbols: ROC4 | rotamase CYP 4 | chr3:22973004-22975139 FORWARD
3	3	3		AT3G62010.2;AT3G62010.1	AT3G62010.2;AT3G62010.1	AT3G62010.2 | Symbols: | unknown protein;LOCATED IN: cellular_component unknown;EXPRESSED IN: 23 plant structures;EXPRESSED DURING: 15 growth stages. | chr3:22964945-22971149 FORWARD LENGTH=1251;AT3G62010.1 | Symbols: | unknown protein;LOCATED IN: ce
3	3	3		AT3G61870.2;AT3G61870.1	AT3G61870.2;AT3G61870.1	AT3G61870.2 | Symbols: | unknown protein;FUNCTIONS IN: molecular_function unknown;INVOLVED IN: biological_process unknown;LOCATED IN: chloroplast, chloroplast inner membrane;EXPRESSED IN: 23 plant structures;EXPRESSED DURING: 14 growth stages;Has 35
3	3	3		AT3G61860.1	AT3G61860.1;AT2G46610.2;AT2G46610.1	AT3G61860.1 | Symbols: ATRSP31, RSP31, At-RS31, RS31 | RNA-binding (RRM/RBD/RNP motifs) family protein | chr3:22900311-22902159 REVERSE LENGTH=264
3	3	3		AT3G61820.1	AT3G61820.1	AT3G61820.1 | Symbols: | Eukaryotic aspartyl protease family protein | chr3:22880074-22881525 REVERSE LENGTH=483
3	3	3		AT3G61760.1	AT3G61760.1	AT3G61760.1 | Symbols: ADL1B, DL1B | DYNAMIN-like 1B | chr3:22860546-22864092 REVERSE LENGTH=610
3	3	3		AT3G61710.2;AT3G61710.1;AT3G61710.3	AT3G61710.2;AT3G61710.1;AT3G61710.3	AT3G61710.2 | Symbols: BECLIN1, AtBECLIN1 | AUTOPHAGY 6 | chr3:22840211-22842253 REVERSE LENGTH=386;AT3G61710.1 | Symbols: ATATG6, ATG6, BECLIN1, AtBECLIN1 | AUTOPHAGY 6 | chr3:22839477-22842253 REVERSE LENGTH=517;AT3G61710.3 | Symbols: BECLIN1, AtBECLIN1
3	3	3		AT3G61690.1	AT3G61690.1	AT3G61690.1 | Symbols: | nucleotidyltransferases | chr3:22828349-22833477 FORWARD LENGTH=1303
3	3	3		AT3G61480.1	AT3G61480.1	AT3G61480.1 | Symbols: | Quinoprotein amine dehydrogenase, beta chain-like;RIC1-like guanyl-nucleotide exchange factor | chr3:22749984-22756476 FORWARD LENGTH=1080
3	3	3		AT3G61470.1	AT3G61470.1	AT3G61470.1 | Symbols: LHCA2 | photosystem I light harvesting complex gene 2 | chr3:22745736-22747032 FORWARD LENGTH=257
3	3	3		AT3G61440.1;AT3G61440.2	AT3G61440.1;AT3G61440.2;AT3G61440.3	AT3G61440.1 | Symbols: ATCYSC1, ARATH;BSAS3;1, CYSC1 | cysteine synthase C1 | chr3:22735885-22737792 FORWARD LENGTH=368;AT3G61440.2 | Symbols: ATCYSC1, CYSC1 | cysteine synthase C1 | chr3:22736383-22737792 FORWARD LENGTH=272
3	3	3		AT3G61430.2;AT3G61430.1	AT3G61430.2;AT3G61430.1	AT3G61430.2 | Symbols: PIP1A, ATPIP1, PIP1, PIP1;1 | plasma membrane intrinsic protein 1A | chr3:22733657-22735113 FORWARD LENGTH=286;AT3G61430.1 | Symbols: PIP1A, ATPIP1, PIP1, PIP1;1 | plasma membrane intrinsic protein 1A | chr3:22733657-22735113 FORWARD
3	3	3		AT3G61260.1	AT3G61260.1	AT3G61260.1 | Symbols: | Remorin family protein | chr3:22675403-22676701 REVERSE LENGTH=212
3	3	3		AT3G61240.2;AT3G61240.1	AT3G61240.2;AT3G61240.1	AT3G61240.2 | Symbols: | DEA(D/H)-box RNA helicase family protein | chr3:22666590-22669154 FORWARD LENGTH=498;AT3G61240.1 | Symbols: | DEA(D/H)-box RNA helicase family protein | chr3:22666590-22669154 FORWARD LENGTH=498
3	3	3		AT3G61220.1;AT3G61220.2	AT3G61220.1;AT3G61220.2;AT2G24190.1;AT2G24190.2;AT1G01800.1	AT3G61220.1 | Symbols: | NAD(P)-binding Rossmann-fold superfamily protein | chr3:22663025-22664316 FORWARD LENGTH=296;AT3G61220.2 | Symbols: | NAD(P)-binding Rossmann-fold superfamily protein | chr3:22663025-22664316 FORWARD LENGTH=303
2	3	3		AT3G61150.1	AT3G61150.1	AT3G61150.1 | Symbols: HDG1, HD-GL2-1 | homeodomain GLABROUS 1 | chr3:22630769-22634875 FORWARD LENGTH=808
3	3	3		AT3G61050.2;AT3G61050.1	AT3G61050.2;AT3G61050.1;AT3G61030.1;AT3G60950.1	AT3G61050.2 | Symbols: NTMC2TYPE4, NTMC2T4 | Calcium-dependent lipid-binding (CaLB domain) family protein | chr3:22597485-22600932 FORWARD LENGTH=510;AT3G61050.1 | Symbols: NTMC2TYPE4, NTMC2T4 | Calcium-dependent lipid-binding (CaLB domain) family protein
3	3	3		AT3G60830.1	AT3G60830.1	AT3G60830.1 | Symbols: ATARP7, ARP7 | actin-related protein 7 | chr3:22474298-22476000 FORWARD LENGTH=363
3	3	3		AT3G60770.1	AT3G60770.1	AT3G60770.1 | Symbols: | Ribosomal protein S13/S15 | chr3:22460525-22461656 REVERSE LENGTH=151
3	3	3		AT3G60750.2;AT3G60750.1	AT3G60750.2;AT3G60750.1	AT3G60750.2 | Symbols: | Transketolase | chr3:22454004-22456824 FORWARD LENGTH=740;AT3G60750.1 | Symbols: | Transketolase | chr3:22454004-22456824 FORWARD LENGTH=741
3	2	3		AT3G60730.1	AT3G60730.1	AT3G60730.1 | Symbols: | Plant invertase/pectin methylesterase inhibitor superfamily | chr3:22444955-22447226 FORWARD LENGTH=519
1	3	3		AT3G60660.1	AT3G60660.1	AT3G60660.1 | Symbols: | unknown protein;CONTAINS InterPro DOMAIN/s: Protein of unknown function DUF1395 (InterPro:IPR009829);Has 131 Blast hits to 131 proteins in 44 species: Archae - 0;Bacteria - 0;Metazoa - 83;Fungi - 0;Plants - 45;Viruses - 0;
3	3	3		AT3G60600.2;AT3G60600.1;AT3G60600.3	AT3G60600.2;AT3G60600.1;AT3G60600.3	AT3G60600.2 | Symbols: VAP27-1 | vesicle associated protein | chr3:22400537-22401650 FORWARD LENGTH=217;AT3G60600.1 | Symbols: VAP27-1, VAP, (AT)VAP, VAP27 | vesicle associated protein | chr3:22400537-22402408 FORWARD LENGTH=256;AT3G60600.3 | Symbols: VAP2
3	3	1		AT3G60500.3;AT3G60500.2;AT3G60500.1	AT3G60500.3;AT3G60500.2;AT3G60500.1	AT3G60500.3 | Symbols: CER7 | 3-5-exoribonuclease family protein | chr3:22354245-22356440 FORWARD LENGTH=438;AT3G60500.2 | Symbols: CER7, G3 | 3-5-exoribonuclease family protein | chr3:22354245-22356440 FORWARD LENGTH=438;AT3G60500.1 | Symbols: CER7, G
3	3	3		AT3G60370.1	AT3G60370.1	AT3G60370.1 | Symbols: | FKBP-like peptidyl-prolyl cis-trans isomerase family protein | chr3:22315000-22316533 REVERSE LENGTH=242
3	3	3		AT3G60245.1;AT3G10950.1	AT3G60245.1;AT3G10950.1	AT3G60245.1 | Symbols: | Zinc-binding ribosomal protein family protein | chr3:22268803-22269750 FORWARD LENGTH=92;AT3G10950.1 | Symbols: | Zinc-binding ribosomal protein family protein | chr3:3423893-3424566 FORWARD LENGTH=92
3	3	3		AT3G60240.3;AT3G60240.4;AT3G60240.2	AT3G60240.3;AT3G60240.4;AT3G60240.2	AT3G60240.3 | Symbols: EIF4G, CUM2 | eukaryotic translation initiation factor 4G | chr3:22261842-22268295 FORWARD LENGTH=1725;AT3G60240.4 | Symbols: EIF4G, CUM2 | eukaryotic translation initiation factor 4G | chr3:22261842-22268295 FORWARD LENGTH=1727;AT3G
3	3	3		AT3G60190.1	AT3G60190.1	AT3G60190.1 | Symbols: ADL4, ADLP2, EDR3, DRP1E, ADL1E, DL1E | DYNAMIN-like 1E | chr3:22244367-22247651 REVERSE LENGTH=624
3	3	3		AT3G59990.4;AT3G59990.3;AT3G59990.2;AT3G59990.1	AT3G59990.4;AT3G59990.3;AT3G59990.2;AT3G59990.1;AT2G44180.1	AT3G59990.4 | Symbols: MAP2B | methionine aminopeptidase 2B | chr3:22155921-22158551 REVERSE LENGTH=439;AT3G59990.3 | Symbols: MAP2B | methionine aminopeptidase 2B | chr3:22155921-22158551 REVERSE LENGTH=439;AT3G59990.2 | Symbols: MAP2B | methionine aminop
3	3	3		AT3G59970.3;AT3G59970.2;AT3G59970.1	AT3G59970.3;AT3G59970.2;AT3G59970.1	AT3G59970.3 | Symbols: MTHFR1 | methylenetetrahydrofolate reductase 1 | chr3:22151303-22154323 FORWARD LENGTH=592;AT3G59970.2 | Symbols: MTHFR1 | methylenetetrahydrofolate reductase 1 | chr3:22151303-22153989 FORWARD LENGTH=407;AT3G59970.1 | Symbols: MTHFR
3	3	3		AT3G59920.1	AT3G59920.1	AT3G59920.1 | Symbols: ATGDI2, GDI2 | RAB GDP dissociation inhibitor 2 | chr3:22135157-22138221 FORWARD LENGTH=444
3	3	2		AT3G59790.1	AT3G59790.1	AT3G59790.1 | Symbols: ATMPK10, MPK10 | MAP kinase 10 | chr3:22092448-22094240 FORWARD LENGTH=393
3	3	3		AT3G59780.1	AT3G59780.1	AT3G59780.1 | Symbols: | Rhodanese/Cell cycle control phosphatase superfamily protein | chr3:22086906-22090324 FORWARD LENGTH=686
3	3	3		AT3G59770.1;AT3G59770.3;AT3G59770.2	AT3G59770.1;AT3G59770.3;AT3G59770.2	AT3G59770.1 | Symbols: SAC9 | sacI homology domain-containing protein / WW domain-containing protein | chr3:22079281-22085674 REVERSE LENGTH=1630;AT3G59770.3 | Symbols: SAC9 | sacI homology domain-containing protein / WW domain-containing protein | chr3:22
3	3	3		AT3G59540.1;AT2G43460.1	AT3G59540.1;AT2G43460.1	AT3G59540.1 | Symbols: | Ribosomal L38e protein family | chr3:21995897-21996742 REVERSE LENGTH=69;AT2G43460.1 | Symbols: | Ribosomal L38e protein family | chr2:18046285-18047292 REVERSE LENGTH=69
3	3	3		AT3G59040.1;AT3G59040.2	AT3G59040.1;AT3G59040.2	AT3G59040.1 | Symbols: | Tetratricopeptide repeat (TPR)-like superfamily protein | chr3:21821495-21824233 REVERSE LENGTH=583;AT3G59040.2 | Symbols: | Tetratricopeptide repeat (TPR)-like superfamily protein | chr3:21821495-21823919 REVERSE LENGTH=590
3	3	3		AT3G58750.1	AT3G58750.1	AT3G58750.1 | Symbols: CSY2 | citrate synthase 2 | chr3:21724564-21727458 REVERSE LENGTH=514
3	3	3		AT3G58730.1	AT3G58730.1	AT3G58730.1 | Symbols: | vacuolar ATP synthase subunit D (VATD) / V-ATPase D subunit / vacuolar proton pump D subunit (VATPD) | chr3:21718495-21719280 REVERSE LENGTH=261
3	3	3		AT3G58660.1	AT3G58660.1;AT2G42650.1	AT3G58660.1 | Symbols: | Ribosomal protein L1p/L10e family | chr3:21701574-21702914 FORWARD LENGTH=446
1	3	3		AT3G58640.2;AT3G58640.1	AT3G58640.2;AT3G58640.1;AT2G31010.2;AT2G31010.1	AT3G58640.2 | Symbols: | Mitogen activated protein kinase kinase kinase-related | chr3:21687153-21692675 REVERSE LENGTH=809;AT3G58640.1 | Symbols: | Mitogen activated protein kinase kinase kinase-related | chr3:21687153-21692675 REVERSE LENGTH=809
3	3	3		AT3G58610.3;AT3G58610.2;AT3G58610.1	AT3G58610.3;AT3G58610.2;AT3G58610.1;REV__AT1G20540.1	AT3G58610.3 | Symbols: | ketol-acid reductoisomerase | chr3:21671561-21674639 FORWARD LENGTH=591;AT3G58610.2 | Symbols: | ketol-acid reductoisomerase | chr3:21671561-21674639 FORWARD LENGTH=591;AT3G58610.1 | Symbols: | ketol-acid reductoisomerase | chr3
2	3	3		AT3G58600.1	AT3G58600.1	AT3G58600.1 | Symbols: | Adaptin ear-binding coat-associated protein 1 NECAP-1 | chr3:21668746-21670999 REVERSE LENGTH=302
3	3	3		AT3G58570.1	AT3G58570.1	AT3G58570.1 | Symbols: | P-loop containing nucleoside triphosphate hydrolases superfamily protein | chr3:21657099-21660352 FORWARD LENGTH=646
3	3	2		AT3G58560.1	AT3G58560.1;AT3G58580.1	AT3G58560.1 | Symbols: | DNAse I-like superfamily protein | chr3:21650880-21653896 REVERSE LENGTH=602
3	3	3		AT3G58510.3;AT3G58510.2;AT3G58510.1	AT3G58510.3;AT3G58510.2;AT3G58510.1	AT3G58510.3 | Symbols: | DEA(D/H)-box RNA helicase family protein | chr3:21640608-21643464 FORWARD LENGTH=612;AT3G58510.2 | Symbols: | DEA(D/H)-box RNA helicase family protein | chr3:21640608-21643464 FORWARD LENGTH=612;AT3G58510.1 | Symbols: | DEA(D/H)
3	3	3		AT3G58500.1	AT3G58500.1	AT3G58500.1 | Symbols: PP2A-4 | protein phosphatase 2A-4 | chr3:21635503-21638911 REVERSE LENGTH=313
1	3	2		AT3G58470.1	AT3G58470.1	AT3G58470.1 | Symbols: | nucleic acid binding;methyltransferases | chr3:21627070-21628507 REVERSE LENGTH=248
1	3	2		AT3G58180.1	AT3G58180.1	AT3G58180.1 | Symbols: | ARM repeat superfamily protein | chr3:21544189-21545981 FORWARD LENGTH=314
3	3	3		AT3G58140.1	AT3G58140.1	AT3G58140.1 | Symbols: | phenylalanyl-tRNA synthetase class IIc family protein | chr3:21529988-21532386 REVERSE LENGTH=429
1	3	3		AT3G58110.2;AT3G58110.1	AT3G58110.2;AT3G58110.1	AT3G58110.2 | Symbols: | unknown protein;FUNCTIONS IN: molecular_function unknown;INVOLVED IN: biological_process unknown;LOCATED IN: cellular_component unknown;BEST Arabidopsis thaliana protein match is: unknown protein (TAIR:AT2G42370.1). | chr3:215
3	3	3		AT3G57990.1	AT3G57990.1	AT3G57990.1 | Symbols: | unknown protein;Has 1497 Blast hits to 1323 proteins in 52 species: Archae - 0;Bacteria - 4;Metazoa - 23;Fungi - 34;Plants - 61;Viruses - 0;Other Eukaryotes - 1375 (source: NCBI BLink). | chr3:21470244-21471347 REVERSE LENG
3	3	3		AT3G57940.2;AT3G57940.1	AT3G57940.2;AT3G57940.1	AT3G57940.2 | Symbols: | Domain of unknown function (DUF1726);Putative ATPase (DUF699) | chr3:21449560-21455834 FORWARD LENGTH=1023;AT3G57940.1 | Symbols: | Domain of unknown function (DUF1726);Putative ATPase (DUF699) | chr3:21449560-21455834 FORWARD
0	3	3		AT3G57910.1	AT3G57910.1	AT3G57910.1 | Symbols: | D111/G-patch domain-containing protein | chr3:21442771-21443968 FORWARD LENGTH=265
3	3	3		AT3G57890.1;AT3G57890.2	AT3G57890.1;AT3G57890.2	AT3G57890.1 | Symbols: | Tubulin binding cofactor C domain-containing protein | chr3:21438271-21441695 FORWARD LENGTH=573;AT3G57890.2 | Symbols: | Tubulin binding cofactor C domain-containing protein | chr3:21438271-21441695 FORWARD LENGTH=609
3	3	3		AT3G57660.1	AT3G57660.1	AT3G57660.1 | Symbols: NRPA1 | nuclear RNA polymerase A1 | chr3:21353746-21362814 FORWARD LENGTH=1670
3	3	3		AT3G57410.1	AT3G57410.1	AT3G57410.1 | Symbols: VLN3, ATVLN3 | villin 3 | chr3:21243615-21249809 REVERSE LENGTH=965
3	3	3		AT3G57300.1;AT3G57300.2	AT3G57300.1;AT3G57300.2;REV__AT4G10030.1	AT3G57300.1 | Symbols: INO80, ATINO80 | INO80 ortholog | chr3:21199612-21207635 FORWARD LENGTH=1507;AT3G57300.2 | Symbols: INO80 | INO80 ortholog | chr3:21199612-21207635 FORWARD LENGTH=1540
3	3	3		AT3G57180.1	AT3G57180.1	AT3G57180.1 | Symbols: BPG2 | P-loop containing nucleoside triphosphate hydrolases superfamily protein | chr3:21163663-21166006 REVERSE LENGTH=660
3	3	3		AT3G57150.1	AT3G57150.1	AT3G57150.1 | Symbols: NAP57, AtNAP57, CBF5, AtCBF5 | homologue of NAP57 | chr3:21154255-21155952 REVERSE LENGTH=565
3	3	3		AT3G57010.1	AT3G57010.1	AT3G57010.1 | Symbols: | Calcium-dependent phosphotriesterase superfamily protein | chr3:21095854-21097316 REVERSE LENGTH=376
3	3	3		AT3G56990.1	AT3G56990.1	AT3G56990.1 | Symbols: EDA7 | embryo sac development arrest 7 | chr3:21088358-21091976 REVERSE LENGTH=711
3	3	3		AT3G56940.1;AT3G56940.2	AT3G56940.1;AT3G56940.2	AT3G56940.1 | Symbols: CRD1, CHL27, ACSF | dicarboxylate diiron protein, putative (Crd1) | chr3:21076594-21078269 FORWARD LENGTH=409;AT3G56940.2 | Symbols: CRD1 | dicarboxylate diiron protein, putative (Crd1) | chr3:21076825-21078269 FORWARD LENGTH=332
3	3	3		AT3G56910.1	AT3G56910.1	AT3G56910.1 | Symbols: PSRP5 | plastid-specific 50S ribosomal protein 5 | chr3:21069558-21070257 REVERSE LENGTH=148
3	3	3		AT3G56860.5;AT3G56860.4;AT3G56860.3;AT3G56860.2;AT3G56860.1	AT3G56860.5;AT3G56860.4;AT3G56860.3;AT3G56860.2;AT3G56860.1;AT2G41060.2;AT2G41060.1	AT3G56860.5 | Symbols: UBA2A | UBP1-associated protein 2A | chr3:21050708-21052144 REVERSE LENGTH=478;AT3G56860.4 | Symbols: UBA2A | UBP1-associated protein 2A | chr3:21050708-21052144 REVERSE LENGTH=478;AT3G56860.3 | Symbols: UBA2A | UBP1-associated prote
0	3	0		AT3G56850.1	AT3G56850.1	AT3G56850.1 | Symbols: AREB3, DPBF3 | ABA-responsive element binding protein 3 | chr3:21046554-21047894 REVERSE LENGTH=297
0	3	3		AT3G56720.1;AT3G56720.2;AT3G56720.3	AT3G56720.1;AT3G56720.2;AT3G56720.3	AT3G56720.1 | Symbols: | unknown protein;Has 6239 Blast hits to 4635 proteins in 365 species: Archae - 6;Bacteria - 230;Metazoa - 3389;Fungi - 659;Plants - 656;Viruses - 13;Other Eukaryotes - 1286 (source: NCBI BLink). | chr3:21011354-21013264 FORW
3	3	3		AT3G56650.1	AT3G56650.1	AT3G56650.1 | Symbols: | Mog1/PsbP/DUF1795-like photosystem II reaction center PsbP family protein | chr3:20984807-20985913 FORWARD LENGTH=262
0	3	0		AT3G56510.2;AT3G56510.1	AT3G56510.2;AT3G56510.1	AT3G56510.2 | Symbols: | RNA-binding (RRM/RBD/RNP motifs) family protein | chr3:20944348-20946235 REVERSE LENGTH=257;AT3G56510.1 | Symbols: | RNA-binding (RRM/RBD/RNP motifs) family protein | chr3:20944348-20946235 REVERSE LENGTH=257
3	3	3		AT3G56460.1	AT3G56460.1	AT3G56460.1 | Symbols: | GroES-like zinc-binding alcohol dehydrogenase family protein | chr3:20933029-20934425 REVERSE LENGTH=348
3	3	3		AT3G56340.1	AT3G56340.1	AT3G56340.1 | Symbols: | Ribosomal protein S26e family protein | chr3:20892309-20893343 REVERSE LENGTH=130
3	3	3		AT3G56240.1	AT3G56240.1	AT3G56240.1 | Symbols: CCH | copper chaperone | chr3:20863460-20864402 REVERSE LENGTH=121
3	3	3		AT3G56150.2;AT3G56150.1	AT3G56150.2;AT3G56150.1;AT5G07740.1	AT3G56150.2 | Symbols: EIF3C | eukaryotic translation initiation factor 3C | chr3:20833790-20836820 REVERSE LENGTH=900;AT3G56150.1 | Symbols: EIF3C, ATEIF3C-1, EIF3C-1, ATTIF3C1, TIF3C1 | eukaryotic translation initiation factor 3C | chr3:20833790-20836820
3	3	3		AT3G56130.1;AT3G56130.4;AT3G56130.2;AT3G56130.3	AT3G56130.1;AT3G56130.4;AT3G56130.2;AT3G56130.3	AT3G56130.1 | Symbols: | biotin/lipoyl attachment domain-containing protein | chr3:20826852-20829007 FORWARD LENGTH=281;AT3G56130.4 | Symbols: | biotin/lipoyl attachment domain-containing protein | chr3:20826852-20829007 FORWARD LENGTH=274;AT3G56130.2 |
3	3	3		AT3G56120.1	AT3G56120.1	AT3G56120.1 | Symbols: | S-adenosyl-L-methionine-dependent methyltransferases superfamily protein | chr3:20823243-20826357 FORWARD LENGTH=468
3	3	3		AT3G55800.1	AT3G55800.1	AT3G55800.1 | Symbols: SBPASE | sedoheptulose-bisphosphatase | chr3:20709640-20711421 FORWARD LENGTH=393
3	3	3		AT3G55770.5;AT3G55770.4;AT3G55770.3;AT3G55770.2;AT3G55770.1;AT3G55770.7	AT3G55770.5;AT3G55770.4;AT3G55770.3;AT3G55770.2;AT3G55770.1;AT3G55770.7;AT3G55770.6	AT3G55770.5 | Symbols: | GATA type zinc finger transcription factor family protein | chr3:20703799-20705115 FORWARD LENGTH=199;AT3G55770.4 | Symbols: | GATA type zinc finger transcription factor family protein | chr3:20703799-20705115 FORWARD LENGTH=199;
3	3	3		AT3G55610.1;AT3G55610.2	AT3G55610.1;AT3G55610.2	AT3G55610.1 | Symbols: P5CS2 | delta 1-pyrroline-5-carboxylate synthase 2 | chr3:20624278-20628989 REVERSE LENGTH=726;AT3G55610.2 | Symbols: P5CS2 | delta 1-pyrroline-5-carboxylate synthase 2 | chr3:20625005-20628989 REVERSE LENGTH=622
2	3	3		AT3G55560.1	AT3G55560.1	AT3G55560.1 | Symbols: AGF2, AHL15 | AT-hook protein of GA feedback 2 | chr3:20604904-20605836 REVERSE LENGTH=310
3	3	3		AT3G55480.2;AT3G55480.1	AT3G55480.2;AT3G55480.1	AT3G55480.2 | Symbols: PAT2 | protein affected traf&#64257;cking 2 | chr3:20566372-20571171 REVERSE LENGTH=1115;AT3G55480.1 | Symbols: PAT2 | protein affected traf&#64257;cking 2 | chr3:20566372-20570629 REVERSE LENGTH=987
3	3	3		AT3G55460.1	AT3G55460.1	AT3G55460.1 | Symbols: SCL30, At-SCL30 | SC35-like splicing factor 30 | chr3:20561024-20563502 FORWARD LENGTH=262
3	3	3		AT3G55440.1	AT3G55440.1	AT3G55440.1 | Symbols: ATCTIMC, TPI, CYTOTPI | triosephosphate isomerase | chr3:20553794-20556078 FORWARD LENGTH=254
3	3	3		AT3G55410.1	AT3G55410.1	AT3G55410.1 | Symbols: | 2-oxoglutarate dehydrogenase, E1 component | chr3:20541897-20545728 FORWARD LENGTH=1017
3	3	3		AT3G55360.1	AT3G55360.1	AT3G55360.1 | Symbols: CER10, ECR, ATTSC13, TSC13 | 3-oxo-5-alpha-steroid 4-dehydrogenase family protein | chr3:20521186-20522856 REVERSE LENGTH=310
3	3	3		AT3G55340.1	AT3G55340.1	AT3G55340.1 | Symbols: PHIP1 | phragmoplastin interacting protein 1 | chr3:20515672-20517832 FORWARD LENGTH=597
3	3	3		AT3G55330.1	AT3G55330.1	AT3G55330.1 | Symbols: PPL1 | PsbP-like protein 1 | chr3:20514031-20515275 REVERSE LENGTH=230
3	3	3		AT3G55280.3;AT3G55280.2;AT3G55280.1;AT2G39460.2;AT2G39460.1	AT3G55280.3;AT3G55280.2;AT3G55280.1;AT2G39460.2;AT2G39460.1	AT3G55280.3 | Symbols: RPL23AB | ribosomal protein L23AB | chr3:20500667-20501519 FORWARD LENGTH=148;AT3G55280.2 | Symbols: RPL23AB | ribosomal protein L23AB | chr3:20500667-20501519 FORWARD LENGTH=154;AT3G55280.1 | Symbols: RPL23AB | ribosomal protein L23
2	3	2		AT3G55270.1	AT3G55270.1	AT3G55270.1 | Symbols: MKP1, ATMKP1 | mitogen-activated protein kinase phosphatase 1 | chr3:20496775-20499408 FORWARD LENGTH=784
2	3	3		AT3G55220.1;AT3G55200.1	AT3G55220.1;AT3G55200.1	AT3G55220.1 | Symbols: | Cleavage and polyadenylation specificity factor (CPSF) A subunit protein | chr3:20467116-20470944 REVERSE LENGTH=1214;AT3G55200.1 | Symbols: | Cleavage and polyadenylation specificity factor (CPSF) A subunit protein | chr3:204605
3	3	3		AT3G54890.4;AT3G54890.1	AT3G54890.4;AT3G54890.1;AT3G54890.3;AT3G54890.2	AT3G54890.4 | Symbols: LHCA1 | photosystem I light harvesting complex gene 1 | chr3:20339881-20340922 REVERSE LENGTH=213;AT3G54890.1 | Symbols: LHCA1 | photosystem I light harvesting complex gene 1 | chr3:20339706-20340922 REVERSE LENGTH=241
3	3	3		AT3G54760.2;AT3G54760.1	AT3G54760.2;AT3G54760.1	AT3G54760.2 | Symbols: | dentin sialophosphoprotein-related | chr3:20269659-20272037 REVERSE LENGTH=761;AT3G54760.1 | Symbols: | dentin sialophosphoprotein-related | chr3:20269659-20272037 REVERSE LENGTH=792
3	3	3		AT3G54670.1;AT3G54670.3	AT3G54670.1;AT3G54670.3;AT3G54670.2	AT3G54670.1 | Symbols: TTN8, SMC1, ATSMC1 | Structural maintenance of chromosomes (SMC) family protein | chr3:20235818-20243701 FORWARD LENGTH=1238;AT3G54670.3 | Symbols: TTN8 | Structural maintenance of chromosomes (SMC) family protein | chr3:20235818-202
0	3	3		AT3G54620.1;AT3G54620.3;AT3G54620.2	AT3G54620.1;AT3G54620.3;AT3G54620.2	AT3G54620.1 | Symbols: ATBZIP25, BZO2H4, BZIP25 | basic leucine zipper 25 | chr3:20218085-20220341 REVERSE LENGTH=403;AT3G54620.3 | Symbols: BZIP25 | basic leucine zipper 25 | chr3:20218085-20220341 REVERSE LENGTH=386;AT3G54620.2 | Symbols: ATBZIP25, BZO2H
3	3	3		AT3G54610.1	AT3G54610.1	AT3G54610.1 | Symbols: HAT1, GCN5, HAG1, HAC3, HAG01, BGT | histone acetyltransferase of the GNAT family 1 | chr3:20213593-20217375 FORWARD LENGTH=568
3	3	3		AT3G54540.1	AT3G54540.1	AT3G54540.1 | Symbols: ATGCN4, GCN4 | general control non-repressible 4 | chr3:20190393-20192564 FORWARD LENGTH=723
2	3	1		AT3G54500.2;AT3G54500.1;AT3G54500.4;AT3G54500.3	AT3G54500.2;AT3G54500.1;AT3G54500.4;AT3G54500.3	AT3G54500.2 | Symbols: | BEST Arabidopsis thaliana protein match is: dentin sialophosphoprotein-related (TAIR:AT5G64170.1);Has 162 Blast hits to 160 proteins in 41 species: Archae - 0;Bacteria - 0;Metazoa - 23;Fungi - 11;Plants - 118;Viruses - 0;Ot
3	3	3		AT3G54470.1	AT3G54470.1;AT1G12775.1	AT3G54470.1 | Symbols: | uridine 5-monophosphate synthase / UMP synthase (PYRE-F) (UMPS) | chr3:20168285-20170245 REVERSE LENGTH=476
3	3	3		AT3G54400.1	AT3G54400.1	AT3G54400.1 | Symbols: | Eukaryotic aspartyl protease family protein | chr3:20140291-20142599 REVERSE LENGTH=425
3	3	3		AT3G54360.1	AT3G54360.1	AT3G54360.1 | Symbols: | zinc ion binding | chr3:20128570-20131581 REVERSE LENGTH=405
1	3	1		AT3G54350.3;AT3G54350.2;AT3G54350.1	AT3G54350.3;AT3G54350.2;AT3G54350.1	AT3G54350.3 | Symbols: emb1967 | Forkhead-associated (FHA) domain-containing protein | chr3:20122298-20126031 REVERSE LENGTH=702;AT3G54350.2 | Symbols: emb1967 | Forkhead-associated (FHA) domain-containing protein | chr3:20122298-20126031 REVERSE LENGTH=
3	3	3		AT3G54230.1;AT3G54230.2	AT3G54230.1;AT3G54230.2	AT3G54230.1 | Symbols: SUA | suppressor of abi3-5 | chr3:20073872-20080142 FORWARD LENGTH=1007;AT3G54230.2 | Symbols: SUA | suppressor of abi3-5 | chr3:20073872-20080142 FORWARD LENGTH=1008
3	3	3		AT3G54210.1	AT3G54210.1	AT3G54210.1 | Symbols: | Ribosomal protein L17 family protein | chr3:20067672-20068385 REVERSE LENGTH=211
1	3	3		AT3G54170.1	AT3G54170.1	AT3G54170.1 | Symbols: ATFIP37, FIP37 | FKBP12 interacting protein 37 | chr3:20056848-20059396 FORWARD LENGTH=330
3	3	3		AT3G54110.1	AT3G54110.1	AT3G54110.1 | Symbols: ATPUMP1, UCP, PUMP1, ATUCP1, UCP1 | plant uncoupling mitochondrial protein 1 | chr3:20038890-20040996 FORWARD LENGTH=306
3	2	3		AT3G54090.1	AT3G54090.1	AT3G54090.1 | Symbols: FLN1 | fructokinase-like 1 | chr3:20028145-20029835 FORWARD LENGTH=471
3	3	3		AT3G54050.2;AT3G54050.1	AT3G54050.2;AT3G54050.1	AT3G54050.2 | Symbols: HCEF1 | high cyclic electron flow 1 | chr3:20016951-20018527 FORWARD LENGTH=417;AT3G54050.1 | Symbols: HCEF1 | high cyclic electron flow 1 | chr3:20016951-20018527 FORWARD LENGTH=417
0	3	3		AT3G53930.1;AT3G53930.2	AT3G53930.1;AT3G53930.2;AT2G37840.1;AT2G37840.2	AT3G53930.1 | Symbols: | Protein kinase superfamily protein | chr3:19966541-19970580 FORWARD LENGTH=711;AT3G53930.2 | Symbols: | Protein kinase superfamily protein | chr3:19966541-19970580 FORWARD LENGTH=712
3	3	3		AT3G53890.2;AT3G53890.1	AT3G53890.2;AT3G53890.1	AT3G53890.2 | Symbols: | Ribosomal protein S21e | chr3:19955582-19956049 REVERSE LENGTH=82;AT3G53890.1 | Symbols: | Ribosomal protein S21e | chr3:19955582-19956049 REVERSE LENGTH=82
3	3	3		AT3G53870.1	AT3G53870.1	AT3G53870.1 | Symbols: | Ribosomal protein S3 family protein | chr3:19951547-19952782 FORWARD LENGTH=249
3	3	3		AT3G53750.1;AT2G37620.2;AT2G37620.1	AT3G53750.1;AT2G37620.2;AT2G37620.1	AT3G53750.1 | Symbols: ACT3 | actin 3 | chr3:19915924-19917371 FORWARD LENGTH=377;AT2G37620.2 | Symbols: ACT1, AAc1 | actin 1 | chr2:15779761-15781241 FORWARD LENGTH=377;AT2G37620.1 | Symbols: ACT1, AAc1 | actin 1 | chr2:15779761-15781241 FORWARD LENGTH=37
3	3	3		AT3G53710.2;AT3G53710.1	AT3G53710.2;AT3G53710.1	AT3G53710.2 | Symbols: AGD6 | ARF-GAP domain 6 | chr3:19903730-19905419 REVERSE LENGTH=459;AT3G53710.1 | Symbols: AGD6 | ARF-GAP domain 6 | chr3:19903730-19905419 REVERSE LENGTH=459
3	3	3		AT3G53700.1	AT3G53700.1	AT3G53700.1 | Symbols: MEE40 | Pentatricopeptide repeat (PPR) superfamily protein | chr3:19900303-19902567 FORWARD LENGTH=754
0	3	3		AT3G53620.1	AT3G53620.1	AT3G53620.1 | Symbols: AtPPa4, PPa4 | pyrophosphorylase 4 | chr3:19881491-19883308 FORWARD LENGTH=216
3	3	3		AT3G53460.3;AT3G53460.2;AT3G53460.1;AT3G53460.4	AT3G53460.3;AT3G53460.2;AT3G53460.1;AT3G53460.4	AT3G53460.3 | Symbols: CP29 | chloroplast RNA-binding protein 29 | chr3:19819738-19821423 REVERSE LENGTH=342;AT3G53460.2 | Symbols: CP29 | chloroplast RNA-binding protein 29 | chr3:19819738-19821423 REVERSE LENGTH=342;AT3G53460.1 | Symbols: CP29 | chloropl
3	3	3		AT3G53430.1	AT3G53430.1	AT3G53430.1 | Symbols: | Ribosomal protein L11 family protein | chr3:19809895-19810395 REVERSE LENGTH=166
3	3	3		AT3G53420.2;AT3G53420.1	AT3G53420.2;AT3G53420.1	AT3G53420.2 | Symbols: PIP2A, PIP2, PIP2;1 | plasma membrane intrinsic protein 2A | chr3:19803906-19805454 REVERSE LENGTH=287;AT3G53420.1 | Symbols: PIP2A, PIP2, PIP2;1 | plasma membrane intrinsic protein 2A | chr3:19803906-19805454 REVERSE LENGTH=287
3	3	3		AT3G53260.1	AT3G53260.1	AT3G53260.1 | Symbols: PAL2, ATPAL2 | phenylalanine ammonia-lyase 2 | chr3:19744256-19746619 REVERSE LENGTH=717
2	3	3		AT3G53120.1	AT3G53120.1	AT3G53120.1 | Symbols: VPS37-1 | Modifier of rudimentary (Mod(r)) protein | chr3:19690729-19692490 REVERSE LENGTH=217
3	3	3		AT3G53110.1	AT3G53110.1	AT3G53110.1 | Symbols: LOS4 | P-loop containing nucleoside triphosphate hydrolases superfamily protein | chr3:19687968-19690423 FORWARD LENGTH=496
3	3	3		AT3G53040.1	AT3G53040.1	AT3G53040.1 | Symbols: | late embryogenesis abundant protein, putative / LEA protein, putative | chr3:19664797-19666405 REVERSE LENGTH=479
3	3	3		AT3G53020.1;AT2G36620.1	AT3G53020.1;AT2G36620.1	AT3G53020.1 | Symbols: STV1, RPL24B, RPL24 | Ribosomal protein L24e family protein | chr3:19660749-19661912 REVERSE LENGTH=163;AT2G36620.1 | Symbols: RPL24A | ribosomal protein L24 | chr2:15350548-15351819 REVERSE LENGTH=164
3	3	3		AT3G52990.1;AT3G52990.2	AT3G52990.1;AT3G52990.2	AT3G52990.1 | Symbols: | Pyruvate kinase family protein | chr3:19649046-19652237 FORWARD LENGTH=527;AT3G52990.2 | Symbols: | Pyruvate kinase family protein | chr3:19649336-19652237 FORWARD LENGTH=474
3	3	3		AT3G52960.1	AT3G52960.1	AT3G52960.1 | Symbols: | Thioredoxin superfamily protein | chr3:19639699-19640403 FORWARD LENGTH=234
3	3	3		AT3G52950.2;AT3G52950.1	AT3G52950.2;AT3G52950.1;AT2G36500.1	AT3G52950.2 | Symbols: | CBS / octicosapeptide/Phox/Bemp1 (PB1) domains-containing protein | chr3:19634866-19636536 FORWARD LENGTH=556;AT3G52950.1 | Symbols: | CBS / octicosapeptide/Phox/Bemp1 (PB1) domains-containing protein | chr3:19634866-19636536 FOR
3	3	3		AT3G52930.1	AT3G52930.1	AT3G52930.1 | Symbols: | Aldolase superfamily protein | chr3:19627383-19628874 REVERSE LENGTH=358
3	3	3		AT3G52880.1;AT3G52880.2	AT3G52880.1;AT3G52880.2	AT3G52880.1 | Symbols: ATMDAR1, MDAR1 | monodehydroascorbate reductase 1 | chr3:19601477-19604366 REVERSE LENGTH=434;AT3G52880.2 | Symbols: ATMDAR1, MDAR1 | monodehydroascorbate reductase 1 | chr3:19601477-19604366 REVERSE LENGTH=466
3	3	3		AT3G52750.1	AT3G52750.1	AT3G52750.1 | Symbols: FTSZ2-2 | Tubulin/FtsZ family protein | chr3:19549841-19552435 REVERSE LENGTH=473
3	3	3		AT3G52730.1	AT3G52730.1	AT3G52730.1 | Symbols: | ubiquinol-cytochrome C reductase UQCRX/QCR9-like family protein | chr3:19543146-19544167 REVERSE LENGTH=72
3	3	3		AT3G52660.2;AT3G52660.1;AT5G28390.1	AT3G52660.2;AT3G52660.1;AT5G28390.1	AT3G52660.2 | Symbols: | RNA-binding (RRM/RBD/RNP motifs) family protein | chr3:19522598-19524735 FORWARD LENGTH=471;AT3G52660.1 | Symbols: | RNA-binding (RRM/RBD/RNP motifs) family protein | chr3:19522598-19524735 FORWARD LENGTH=471;AT5G28390.1 | Symbol
0	3	3		AT3G52610.1	AT3G52610.1	AT3G52610.1 | Symbols: | unknown protein;Has 68 Blast hits to 67 proteins in 21 species: Archae - 0;Bacteria - 11;Metazoa - 0;Fungi - 0;Plants - 55;Viruses - 0;Other Eukaryotes - 2 (source: NCBI BLink). | chr3:19510513-19512547 FORWARD LENGTH=475
3	3	3		AT3G52560.1;AT3G52560.2;AT3G52560.4	AT3G52560.1;AT3G52560.2;AT3G52560.4;AT3G52560.3	AT3G52560.1 | Symbols: UEV1D-4, MMZ4, UEV1D | ubiquitin E2 variant 1D-4 | chr3:19494678-19495954 REVERSE LENGTH=146;AT3G52560.2 | Symbols: UEV1D-4 | ubiquitin E2 variant 1D-4 | chr3:19494678-19495954 REVERSE LENGTH=147;AT3G52560.4 | Symbols: UEV1D-4 | ubiq
3	3	3		AT3G52340.3;AT3G52340.2;AT3G52340.1	AT3G52340.3;AT3G52340.2;AT3G52340.1	AT3G52340.3 | Symbols: SPP2 | sucrose-6F-phosphate phosphohydrolase 2 | chr3:19407412-19409182 FORWARD LENGTH=423;AT3G52340.2 | Symbols: SPP2 | sucrose-6F-phosphate phosphohydrolase 2 | chr3:19407412-19409182 FORWARD LENGTH=423;AT3G52340.1 | Symbols: SPP2,
1	3	3		AT3G52300.1;AT3G52300.2	AT3G52300.1;AT3G52300.2	AT3G52300.1 | Symbols: ATPQ | ATP synthase D chain, mitochondrial | chr3:19396689-19398119 FORWARD LENGTH=168;AT3G52300.2 | Symbols: ATPQ | ATP synthase D chain, mitochondrial | chr3:19396689-19397866 FORWARD LENGTH=122
3	3	3		AT3G52250.1	AT3G52250.1;AT4G20160.1	AT3G52250.1 | Symbols: | Duplicated homeodomain-like superfamily protein | chr3:19376629-19383100 FORWARD LENGTH=1656
1	3	1		AT3G52220.1	AT3G52220.1	AT3G52220.1 | Symbols: | CONTAINS InterPro DOMAIN/s: Kinase phosphorylation domain (InterPro:IPR019315);Has 8882 Blast hits to 4920 proteins in 346 species: Archae - 10;Bacteria - 184;Metazoa - 3955;Fungi - 1221;Plants - 712;Viruses - 24;Other Euka
3	2	3		AT3G52200.1;AT3G52200.2	AT3G52200.1;AT3G52200.2	AT3G52200.1 | Symbols: LTA3 | Dihydrolipoamide acetyltransferase, long form protein | chr3:19360317-19366091 FORWARD LENGTH=637;AT3G52200.2 | Symbols: LTA3 | Dihydrolipoamide acetyltransferase, long form protein | chr3:19360317-19366091 FORWARD LENGTH=713
3	3	3		AT3G52140.1;AT3G52140.2;AT3G52140.4;AT3G52140.3	AT3G52140.1;AT3G52140.2;AT3G52140.4;AT3G52140.3	AT3G52140.1 | Symbols: | tetratricopeptide repeat (TPR)-containing protein | chr3:19333232-19341295 FORWARD LENGTH=1403;AT3G52140.2 | Symbols: | tetratricopeptide repeat (TPR)-containing protein | chr3:19333232-19341295 FORWARD LENGTH=1407;AT3G52140.4 |
1	3	3		AT3G52120.1;AT3G52120.2	AT3G52120.1;AT3G52120.2	AT3G52120.1 | Symbols: | SWAP (Suppressor-of-White-APricot)/surp domain-containing protein / D111/G-patch domain-containing protein | chr3:19329243-19331738 FORWARD LENGTH=443;AT3G52120.2 | Symbols: | SWAP (Suppressor-of-White-APricot)/surp domain-contai
3	3	3		AT3G52100.1	AT3G52100.1	AT3G52100.1 | Symbols: | RING/FYVE/PHD-type zinc finger family protein | chr3:19319343-19322773 FORWARD LENGTH=696
3	3	3		AT3G51880.4;AT3G51880.3;AT3G51880.1;AT3G51880.2	AT3G51880.4;AT3G51880.3;AT3G51880.1;AT3G51880.2	AT3G51880.4 | Symbols: HMGB1 | high mobility group B1 | chr3:19247241-19248491 REVERSE LENGTH=161;AT3G51880.3 | Symbols: HMGB1, NFD1 | high mobility group B1 | chr3:19247241-19248491 REVERSE LENGTH=178;AT3G51880.1 | Symbols: HMGB1, NFD1 | high mobility gro
3	3	3		AT3G51840.1	AT3G51840.1	AT3G51840.1 | Symbols: ACX4, ATSCX, ATG6 | acyl-CoA oxidase 4 | chr3:19225653-19229008 REVERSE LENGTH=436
3	3	3		AT3G51800.3;AT3G51800.1;AT3G51800.2	AT3G51800.3;AT3G51800.1;AT3G51800.2	AT3G51800.3 | Symbols: ATG2 | metallopeptidase M24 family protein | chr3:19211261-19213568 REVERSE LENGTH=385;AT3G51800.1 | Symbols: ATG2, EBP1, ATEBP1 | metallopeptidase M24 family protein | chr3:19211261-19213568 REVERSE LENGTH=392;AT3G51800.2 | Symbols:
3	3	3		AT3G51550.1	AT3G51550.1;AT1G16110.1;AT1G16160.1;AT1G16120.1;AT1G16150.1;AT5G24010.1;AT5G61350.1;AT1G30570.1;AT3G04690.1;AT5G28680.1	AT3G51550.1 | Symbols: FER | Malectin/receptor-like protein kinase family protein | chr3:19117877-19120564 REVERSE LENGTH=895
0	3	2		AT3G51240.2;AT3G51240.1	AT3G51240.2;AT3G51240.1	AT3G51240.2 | Symbols: F3H | flavanone 3-hydroxylase | chr3:19025661-19026658 FORWARD LENGTH=274;AT3G51240.1 | Symbols: F3H, TT6, F3H | flavanone 3-hydroxylase | chr3:19025409-19026658 FORWARD LENGTH=358
3	3	3		AT3G51160.1	AT3G51160.1;AT5G66280.1	AT3G51160.1 | Symbols: MUR1, MUR_1, GMD2 | NAD(P)-binding Rossmann-fold superfamily protein | chr3:19007232-19008353 REVERSE LENGTH=373
1	3	1		AT3G51130.1	AT3G51130.1	AT3G51130.1 | Symbols: | unknown protein;CONTAINS InterPro DOMAIN/s: Uncharacterised protein family UPF0183 (InterPro:IPR005373);Has 269 Blast hits to 265 proteins in 123 species: Archae - 0;Bacteria - 0;Metazoa - 131;Fungi - 82;Plants - 37;Viruses
2	3	3		AT3G51120.1	AT3G51120.1	AT3G51120.1 | Symbols: | DNA binding;zinc ion binding;nucleic acid binding;nucleic acid binding | chr3:18986026-18991886 REVERSE LENGTH=1292
3	3	3		AT3G51010.1	AT3G51010.1	AT3G51010.1 | Symbols: | unknown protein;FUNCTIONS IN: molecular_function unknown;INVOLVED IN: biological_process unknown;LOCATED IN: mitochondrion, plastid;EXPRESSED IN: 22 plant structures;EXPRESSED DURING: 13 growth stages;Has 24 Blast hits to 24
3	3	3		AT3G50700.1	AT3G50700.1	AT3G50700.1 | Symbols: AtIDD2, IDD2 | indeterminate(ID)-domain 2 | chr3:18840945-18842829 FORWARD LENGTH=452
3	3	3		AT3G50670.1;AT3G50670.2	AT3G50670.1;AT3G50670.2	AT3G50670.1 | Symbols: U1-70K, U1SNRNP | U1 small nuclear ribonucleoprotein-70K | chr3:18826476-18829492 REVERSE LENGTH=427;AT3G50670.2 | Symbols: U1-70K, U1SNRNP | U1 small nuclear ribonucleoprotein-70K | chr3:18828232-18829492 REVERSE LENGTH=204
3	3	3		AT3G50590.1	AT3G50590.1	AT3G50590.1 | Symbols: | Transducin/WD40 repeat-like superfamily protein | chr3:18771292-18779220 FORWARD LENGTH=1614
3	3	3		AT3G50370.1	AT3G50370.1	AT3G50370.1 | Symbols: | unknown protein;FUNCTIONS IN: molecular_function unknown;INVOLVED IN: biological_process unknown;LOCATED IN: cellular_component unknown;EXPRESSED IN: 26 plant structures;EXPRESSED DURING: 15 growth stages;Has 27734 Blast hit
0	3	0		AT3G50360.1	AT3G50360.1	AT3G50360.1 | Symbols: ATCEN2, CEN1, CEN2 | centrin2 | chr3:18674421-18675502 FORWARD LENGTH=169
1	3	1		AT3G50210.3;AT3G50210.1;AT3G50210.2	AT3G50210.3;AT3G50210.1;AT3G50210.2;AT3G49630.1	AT3G50210.3 | Symbols: | 2-oxoglutarate (2OG) and Fe(II)-dependent oxygenase superfamily protein | chr3:18614338-18616229 REVERSE LENGTH=332;AT3G50210.1 | Symbols: | 2-oxoglutarate (2OG) and Fe(II)-dependent oxygenase superfamily protein | chr3:18614338-
3	3	3		AT3G50000.1	AT3G50000.1	AT3G50000.1 | Symbols: CKA2, ATCKA2 | casein kinase II, alpha chain 2 | chr3:18534487-18536743 FORWARD LENGTH=403
2	3	3		AT3G49990.1	AT3G49990.1	AT3G49990.1 | Symbols: | unknown protein;Has 1524 Blast hits to 1298 proteins in 225 species: Archae - 9;Bacteria - 84;Metazoa - 474;Fungi - 184;Plants - 98;Viruses - 17;Other Eukaryotes - 658 (source: NCBI BLink). | chr3:18532492-18534000 REVERSE
3	3	3		AT3G49910.1	AT3G49910.1	AT3G49910.1 | Symbols: | Translation protein SH3-like family protein | chr3:18504311-18504751 FORWARD LENGTH=146
3	3	3		AT3G49720.2;AT3G49720.1	AT3G49720.2;AT3G49720.1;AT5G65810.1	AT3G49720.2 | Symbols: | unknown protein;FUNCTIONS IN: molecular_function unknown;INVOLVED IN: biological_process unknown;LOCATED IN: chloroplast thylakoid membrane, Golgi apparatus, plasma membrane, membrane;EXPRESSED IN: 25 plant structures;EXPRESS
3	3	3		AT3G49601.1	AT3G49601.1	AT3G49601.1 | Symbols: | FUNCTIONS IN: molecular_function unknown;INVOLVED IN: biological_process unknown;LOCATED IN: cellular_component unknown;CONTAINS InterPro DOMAIN/s: mRNA splicing factor, Cwf21 (InterPro:IPR013170);Has 30201 Blast hits to 17322
2	3	3		AT3G49600.1	AT3G49600.1	AT3G49600.1 | Symbols: UBP26, SUP32, ATUBP26 | ubiquitin-specific protease 26 | chr3:18380942-18386662 REVERSE LENGTH=1067
1	3	3		AT3G49490.1	AT3G49490.1	AT3G49490.1 | Symbols: | unknown protein;Has 722 Blast hits to 186 proteins in 64 species: Archae - 0;Bacteria - 30;Metazoa - 72;Fungi - 48;Plants - 38;Viruses - 0;Other Eukaryotes - 534 (source: NCBI BLink). | chr3:18344926-18348648 REVERSE LENGTH
2	3	3		AT3G49470.1	AT3G49470.1	AT3G49470.1 | Symbols: NACA2 | nascent polypeptide-associated complex subunit alpha-like protein 2 | chr3:18341072-18342273 FORWARD LENGTH=217
3	3	3		AT3G49430.2;AT3G49430.3;AT3G49430.1	AT3G49430.2;AT3G49430.3;AT3G49430.1	AT3G49430.2 | Symbols: SRp34a, SR34a, At-SR34a | SER/ARG-rich protein 34A | chr3:18332668-18334617 FORWARD LENGTH=297;AT3G49430.3 | Symbols: SRp34a, SR34a, At-SR34a | SER/ARG-rich protein 34A | chr3:18332668-18334829 FORWARD LENGTH=300;AT3G49430.1 | Symbol
3	3	3		AT3G49240.1	AT3G49240.1	AT3G49240.1 | Symbols: emb1796 | Pentatricopeptide repeat (PPR) superfamily protein | chr3:18256086-18257975 FORWARD LENGTH=629
3	3	3		AT3G49010.3;AT3G49010.2;AT3G49010.1;AT3G49010.4;AT3G49010.5	AT3G49010.3;AT3G49010.2;AT3G49010.1;AT3G49010.4;AT3G49010.5	AT3G49010.3 | Symbols: ATBBC1, BBC1, RSU2 | breast basic conserved 1 | chr3:18166971-18168047 REVERSE LENGTH=206;AT3G49010.2 | Symbols: ATBBC1, BBC1, RSU2 | breast basic conserved 1 | chr3:18166971-18168047 REVERSE LENGTH=206;AT3G49010.1 | Symbols: ATBBC1,
3	3	3		AT3G48990.1	AT3G48990.1	AT3G48990.1 | Symbols: | AMP-dependent synthetase and ligase family protein | chr3:18159031-18161294 REVERSE LENGTH=514
3	3	3		AT3G48930.1	AT3G48930.1	AT3G48930.1 | Symbols: EMB1080 | Nucleic acid-binding, OB-fold-like protein | chr3:18141017-18142189 REVERSE LENGTH=160
3	3	3		AT3G48870.2;AT3G48870.1	AT3G48870.2;AT3G48870.1	AT3G48870.2 | Symbols: HSP93-III | Clp ATPase | chr3:18122363-18125915 REVERSE LENGTH=921;AT3G48870.1 | Symbols: ATCLPC, ATHSP93-III, HSP93-III | Clp ATPase | chr3:18122363-18126008 REVERSE LENGTH=952
3	3	3		AT3G48750.1	AT3G48750.1;AT5G01850.1;AT5G50180.1;AT5G40540.1;AT3G27560.1;AT3G50720.1;AT1G18040.1;AT1G73690.1;AT5G66710.1;AT1G52290.1	AT3G48750.1 | Symbols: CDKA;1, CDC2AAT, CDK2, CDC2, CDC2A, CDKA1 | cell division control 2 | chr3:18072238-18074296 FORWARD LENGTH=294
3	3	3		AT3G48730.1	AT3G48730.1	AT3G48730.1 | Symbols: GSA2 | glutamate-1-semialdehyde 2,1-aminomutase 2 | chr3:18049697-18051550 FORWARD LENGTH=472
3	3	3		AT3G48710.1	AT3G48710.1	AT3G48710.1 | Symbols: | DEK domain-containing chromatin associated protein | chr3:18041024-18043995 FORWARD LENGTH=462
3	3	3		AT3G48690.1	AT3G48690.1;AT3G48700.1	AT3G48690.1 | Symbols: ATCXE12, CXE12 | alpha/beta-Hydrolases superfamily protein | chr3:18037186-18038160 REVERSE LENGTH=324
0	3	3		AT3G48670.2;AT3G48670.1	AT3G48670.2;AT3G48670.1	AT3G48670.2 | Symbols: IDN2, RDM12 | XH/XS domain-containing protein | chr3:18031240-18033615 FORWARD LENGTH=647;AT3G48670.1 | Symbols: IDN2, RDM12 | XH/XS domain-containing protein | chr3:18031240-18033615 FORWARD LENGTH=647
3	3	3		AT3G48560.1	AT3G48560.1	AT3G48560.1 | Symbols: CSR1, ALS, AHAS, TZP5, IMR1 | chlorsulfuron/imidazolinone resistant 1 | chr3:18001530-18003542 REVERSE LENGTH=670
2	3	3		AT3G48500.1;AT3G48500.2	AT3G48500.1;AT3G48500.2	AT3G48500.1 | Symbols: PDE312, PTAC10 | Nucleic acid-binding, OB-fold-like protein | chr3:17962209-17965408 FORWARD LENGTH=668;AT3G48500.2 | Symbols: PDE312, PTAC10 | Nucleic acid-binding, OB-fold-like protein | chr3:17962209-17965408 FORWARD LENGTH=697
3	3	3		AT3G48430.1	AT3G48430.1	AT3G48430.1 | Symbols: REF6 | relative of early flowering 6 | chr3:17935609-17940456 FORWARD LENGTH=1360
0	3	0		AT3G48425.1	AT3G48425.1	AT3G48425.1 | Symbols: | DNAse I-like superfamily protein | chr3:17931910-17934493 FORWARD LENGTH=364
0	3	2		AT3G48330.2;AT3G48330.1	AT3G48330.2;AT3G48330.1	AT3G48330.2 | Symbols: PIMT1 | protein-l-isoaspartate methyltransferase 1 | chr3:17892969-17893975 REVERSE LENGTH=230;AT3G48330.1 | Symbols: PIMT1, ATPIMT1 | protein-l-isoaspartate methyltransferase 1 | chr3:17892969-17893975 REVERSE LENGTH=230
3	3	3		AT3G48110.1	AT3G48110.1	AT3G48110.1 | Symbols: EDD1, EDD | glycine-tRNA ligases | chr3:17763111-17770964 FORWARD LENGTH=1067
1	3	3		AT3G48060.1	AT3G48060.1	AT3G48060.1 | Symbols: | BAH domain;TFIIS helical bundle-like domain | chr3:17743234-17748372 REVERSE LENGTH=1611
1	3	3		AT3G48050.2;AT3G48050.1	AT3G48050.2;AT3G48050.1	AT3G48050.2 | Symbols: | BAH domain;TFIIS helical bundle-like domain | chr3:17734270-17739412 REVERSE LENGTH=1613;AT3G48050.1 | Symbols: | BAH domain;TFIIS helical bundle-like domain | chr3:17734270-17739412 REVERSE LENGTH=1613
3	3	3		AT3G48000.1	AT3G48000.1	AT3G48000.1 | Symbols: ALDH2B4, ALDH2, ALDH2A | aldehyde dehydrogenase 2B4 | chr3:17717082-17719843 REVERSE LENGTH=538
1	3	3		AT3G47910.1;AT3G47910.2	AT3G47910.1;AT3G47910.2	AT3G47910.1 | Symbols: | Ubiquitin carboxyl-terminal hydrolase-related protein | chr3:17674737-17681444 REVERSE LENGTH=1606;AT3G47910.2 | Symbols: | Ubiquitin carboxyl-terminal hydrolase-related protein | chr3:17674737-17681444 REVERSE LENGTH=1607
3	3	3		AT3G47650.1	AT3G47650.1	AT3G47650.1 | Symbols: | DnaJ/Hsp40 cysteine-rich domain superfamily protein | chr3:17569576-17570262 FORWARD LENGTH=136
3	3	2		AT3G47620.1	AT3G47620.1	AT3G47620.1 | Symbols: AtTCP14, TCP14 | TEOSINTE BRANCHED, cycloidea and PCF (TCP) 14 | chr3:17559004-17560473 FORWARD LENGTH=489
3	3	3		AT3G47610.1	AT3G47610.1;REV__AT4G16100.1	AT3G47610.1 | Symbols: | transcription regulators;zinc ion binding | chr3:17549178-17551204 FORWARD LENGTH=408
3	3	3		AT3G47520.1	AT3G47520.1	AT3G47520.1 | Symbols: MDH | malate dehydrogenase | chr3:17513657-17514868 FORWARD LENGTH=403
3	3	3		AT3G47470.1	AT3G47470.1	AT3G47470.1 | Symbols: LHCA4, CAB4 | light-harvesting chlorophyll-protein complex I subunit A4 | chr3:17493622-17494773 REVERSE LENGTH=251
3	3	3		AT3G47370.3;AT3G47370.2;AT3G47370.1	AT3G47370.3;AT3G47370.2;AT3G47370.1	AT3G47370.3 | Symbols: | Ribosomal protein S10p/S20e family protein | chr3:17453671-17454437 REVERSE LENGTH=122;AT3G47370.2 | Symbols: | Ribosomal protein S10p/S20e family protein | chr3:17453671-17454437 REVERSE LENGTH=122;AT3G47370.1 | Symbols: | Ribo
3	3	3		AT3G47340.1;AT3G47340.2;AT3G47340.3	AT3G47340.1;AT3G47340.2;AT3G47340.3	AT3G47340.1 | Symbols: ASN1, DIN6, AT-ASN1 | glutamine-dependent asparagine synthase 1 | chr3:17438136-17441043 REVERSE LENGTH=584;AT3G47340.2 | Symbols: ASN1, DIN6, AT-ASN1 | glutamine-dependent asparagine synthase 1 | chr3:17438445-17441043 REVERSE LENGT
3	3	3		AT3G47120.1	AT3G47120.1	AT3G47120.1 | Symbols: | RNA recognition motif (RRM)-containing protein | chr3:17351334-17352769 REVERSE LENGTH=352
3	3	3		AT3G47070.1	AT3G47070.1	AT3G47070.1 | Symbols: | LOCATED IN: thylakoid, chloroplast thylakoid membrane, chloroplast, chloroplast envelope;EXPRESSED IN: 22 plant structures;EXPRESSED DURING: 13 growth stages;CONTAINS InterPro DOMAIN/s: Thylakoid soluble phosphoprotein TSP9 (In
3	3	3		AT3G46970.1	AT3G46970.1	AT3G46970.1 | Symbols: ATPHS2, PHS2 | alpha-glucan phosphorylase 2 | chr3:17301625-17306111 REVERSE LENGTH=841
3	3	3		AT3G46830.1;AT1G07410.1	AT3G46830.1;AT1G07410.1	AT3G46830.1 | Symbols: ATRAB11A, ATRABA2C, ATRAB-A2C, RAB-A2C, RABA2c | RAB GTPase homolog A2C | chr3:17246699-17248362 REVERSE LENGTH=217;AT1G07410.1 | Symbols: ATRABA2B, RAB-A2B, ATRAB-A2B, RABA2b | RAB GTPase homolog A2B | chr1:2276270-2277154 FORWARD L
3	3	3		AT3G46780.1	AT3G46780.1	AT3G46780.1 | Symbols: PTAC16 | plastid transcriptionally active 16 | chr3:17228766-17231021 FORWARD LENGTH=510
3	3	3		AT3G46740.1	AT3G46740.1	AT3G46740.1 | Symbols: TOC75-III, MAR1 | translocon at the outer envelope membrane of chloroplasts 75-III | chr3:17216104-17219296 REVERSE LENGTH=818
1	3	1		AT3G46670.1	AT3G46670.1	AT3G46670.1 | Symbols: UGT76E11 | UDP-glucosyl transferase 76E11 | chr3:17192795-17194227 REVERSE LENGTH=451
0	3	0		AT3G46580.1	AT3G46580.1	AT3G46580.1 | Symbols: MBD05, MBD5, ATMBD5 | methyl-CPG-binding domain protein 5 | chr3:17148397-17149328 FORWARD LENGTH=182
3	3	3		AT3G46290.1	AT3G46290.1;AT5G59700.1;AT5G54380.1;AT2G21480.1;AT4G39110.1;AT5G15730.1;AT5G15730.2;AT2G39360.1;AT2G23200.1;AT5G49770.1;AT1G79620.1	AT3G46290.1 | Symbols: HERK1 | hercules receptor kinase 1 | chr3:17013009-17015501 FORWARD LENGTH=830
1	3	1		AT3G46220.3;AT3G46220.1;AT3G46220.2	AT3G46220.3;AT3G46220.1;AT3G46220.2	AT3G46220.3 | Symbols: | unknown protein;INVOLVED IN: biological_process unknown;EXPRESSED IN: 24 plant structures;EXPRESSED DURING: 13 growth stages;CONTAINS InterPro DOMAIN/s: Protein of unknown function DUF2042 (InterPro:IPR018611). | chr3:16979174
0	3	1		AT3G46210.6;AT3G46210.5;AT3G46210.4;AT3G46210.3;AT3G46210.2;AT3G46210.1	AT3G46210.6;AT3G46210.5;AT3G46210.4;AT3G46210.3;AT3G46210.2;AT3G46210.1	AT3G46210.6 | Symbols: | Ribosomal protein S5 domain 2-like superfamily protein | chr3:16976960-16978489 REVERSE LENGTH=239;AT3G46210.5 | Symbols: | Ribosomal protein S5 domain 2-like superfamily protein | chr3:16976960-16978489 REVERSE LENGTH=239;AT3G46
3	3	3		AT3G46060.3;AT3G46060.2;AT3G46060.1;AT5G03520.1;AT5G03520.2;AT3G09900.1	AT3G46060.3;AT3G46060.2;AT3G46060.1;AT5G03520.1;AT5G03520.2;AT3G09900.1	AT3G46060.3 | Symbols: ARA3 | RAB GTPase homolog 8A | chr3:16917908-16919740 FORWARD LENGTH=216;AT3G46060.2 | Symbols: ARA3 | RAB GTPase homolog 8A | chr3:16917908-16919740 FORWARD LENGTH=216;AT3G46060.1 | Symbols: ARA3, ARA-3, ATRABE1C, ATRAB8A, RAB8A | R
3	3	3		AT3G46040.1	AT3G46040.1	AT3G46040.1 | Symbols: RPS15AD | ribosomal protein S15A D | chr3:16914891-16915529 FORWARD LENGTH=130
3	3	3		AT3G45830.1	AT3G45830.1	AT3G45830.1 | Symbols: | unknown protein;FUNCTIONS IN: molecular_function unknown;INVOLVED IN: biological_process unknown;LOCATED IN: cellular_component unknown;EXPRESSED IN: 24 plant structures;EXPRESSED DURING: 15 growth stages;BEST Arabidopsis th
3	3	3		AT3G45780.2;AT3G45780.1	AT3G45780.2;AT3G45780.1	AT3G45780.2 | Symbols: PHOT1, NPH1, JK224, RPT1 | phototropin 1 | chr3:16818557-16823960 FORWARD LENGTH=996;AT3G45780.1 | Symbols: PHOT1, NPH1, JK224, RPT1 | phototropin 1 | chr3:16818557-16823960 FORWARD LENGTH=996
3	3	3		AT3G45190.1	AT3G45190.1	AT3G45190.1 | Symbols: | SIT4 phosphatase-associated family protein | chr3:16541994-16548161 REVERSE LENGTH=789
3	3	3		AT3G45140.1	AT3G45140.1	AT3G45140.1 | Symbols: LOX2, ATLOX2 | lipoxygenase 2 | chr3:16525437-16529233 FORWARD LENGTH=896
3	3	3		AT3G44890.1	AT3G44890.1	AT3G44890.1 | Symbols: RPL9 | ribosomal protein L9 | chr3:16386505-16387963 FORWARD LENGTH=197
3	3	3		AT3G44750.2;AT3G44750.1	AT3G44750.2;AT3G44750.1	AT3G44750.2 | Symbols: HDA3 | histone deacetylase 3 | chr3:16298045-16299585 FORWARD LENGTH=242;AT3G44750.1 | Symbols: HD2A, ATHD2A, HDA3, HDT1 | histone deacetylase 3 | chr3:16298045-16299585 FORWARD LENGTH=245
3	3	3		AT3G44530.2;AT3G44530.1	AT3G44530.2;AT3G44530.1	AT3G44530.2 | Symbols: HIRA | homolog of histone chaperone HIRA | chr3:16116026-16121247 FORWARD LENGTH=1040;AT3G44530.1 | Symbols: HIRA | homolog of histone chaperone HIRA | chr3:16116026-16121247 FORWARD LENGTH=1058
2	3	1		AT3G44380.1	AT3G44380.1	AT3G44380.1 | Symbols: | Late embryogenesis abundant (LEA) hydroxyproline-rich glycoprotein family | chr3:16036254-16036814 REVERSE LENGTH=186
3	3	3		AT3G44340.1;AT3G44340.2	AT3G44340.1;AT3G44340.2;AT4G32640.2;AT4G32640.1	AT3G44340.1 | Symbols: CEF | clone eighty-four | chr3:16011923-16019873 REVERSE LENGTH=1096;AT3G44340.2 | Symbols: CEF | clone eighty-four | chr3:16012084-16019873 REVERSE LENGTH=1069
3	3	3		AT3G44320.1	AT3G44320.1	AT3G44320.1 | Symbols: NIT3, AtNIT3 | nitrilase 3 | chr3:15993419-15995493 FORWARD LENGTH=346
3	3	3		AT3G44310.3;AT3G44310.1	AT3G44310.3;AT3G44310.1;AT3G44310.2	AT3G44310.3 | Symbols: NIT1, ATNIT1, NITI | nitrilase 1 | chr3:15986901-15988841 FORWARD LENGTH=346;AT3G44310.1 | Symbols: NIT1, ATNIT1, NITI | nitrilase 1 | chr3:15986901-15988841 FORWARD LENGTH=346
0	3	3		AT3G44200.1	AT3G44200.1;AT3G20860.1;AT3G59730.1;AT3G63280.2;AT3G63280.1;AT5G28290.1;AT3G04810.2;AT3G04810.1;AT1G54510.3;AT1G54510.2;AT1G54510.1;AT1G70130.1;AT1G15530.1;AT2G43700.1;AT3G59740.1;AT3G59700.1;AT1G70110.1;AT4G29050.1	AT3G44200.1 | Symbols: ATNEK6, NEK6, IBO1 | NIMA (never in mitosis, gene A)-related 6 | chr3:15906788-15911365 FORWARD LENGTH=956
3	3	3		AT3G44110.1;AT3G44110.2	AT3G44110.1;AT3G44110.2	AT3G44110.1 | Symbols: ATJ3, ATJ | DNAJ homologue 3 | chr3:15869115-15871059 REVERSE LENGTH=420;AT3G44110.2 | Symbols: ATJ3, ATJ | DNAJ homologue 3 | chr3:15869179-15871059 REVERSE LENGTH=343
3	3	3		AT3G44100.1	AT3G44100.1	AT3G44100.1 | Symbols: | MD-2-related lipid recognition domain-containing protein | chr3:15866162-15867273 REVERSE LENGTH=152
3	3	3		AT3G43590.1	AT3G43590.1	AT3G43590.1 | Symbols: | zinc knuckle (CCHC-type) family protein | chr3:15509753-15512255 FORWARD LENGTH=551
3	3	3		AT3G43300.2;AT3G43300.1	AT3G43300.2;AT3G43300.1	AT3G43300.2 | Symbols: ATMIN7 | HOPM interactor 7 | chr3:15234235-15245034 REVERSE LENGTH=1727;AT3G43300.1 | Symbols: ATMIN7, BEN1 | HOPM interactor 7 | chr3:15234235-15245034 REVERSE LENGTH=1758
3	3	3		AT3G43240.1	AT3G43240.1	AT3G43240.1 | Symbols: | ARID/BRIGHT DNA-binding domain-containing protein | chr3:15210032-15214440 REVERSE LENGTH=747
0	3	0		AT3G42860.1	AT3G42860.1	AT3G42860.1 | Symbols: | zinc knuckle (CCHC-type) family protein | chr3:14946458-14948097 REVERSE LENGTH=372
2	3	3		AT3G42790.1	AT3G42790.1	AT3G42790.1 | Symbols: AL3 | alfin-like 3 | chr3:14878128-14879618 REVERSE LENGTH=250
3	3	3		AT3G42170.1	AT3G42170.1	AT3G42170.1 | Symbols: | BED zinc finger;hAT family dimerisation domain | chr3:14321838-14323928 FORWARD LENGTH=696
3	3	3		AT3G42050.1	AT3G42050.1	AT3G42050.1 | Symbols: | vacuolar ATP synthase subunit H family protein | chr3:14228846-14232228 REVERSE LENGTH=441
3	3	3		AT3G30775.1	AT3G30775.1	AT3G30775.1 | Symbols: ERD5, PRODH, AT-POX, ATPOX, ATPDH, PRO1 | Methylenetetrahydrofolate reductase family protein | chr3:12448880-12451126 REVERSE LENGTH=499
0	3	3		AT3G29390.1	AT3G29390.1	AT3G29390.1 | Symbols: RIK | RS2-interacting KH protein | chr3:11289675-11294524 FORWARD LENGTH=578
3	3	3		AT3G29360.2;AT3G29360.1	AT3G29360.2;AT3G29360.1	AT3G29360.2 | Symbols: | UDP-glucose 6-dehydrogenase family protein | chr3:11267375-11268817 REVERSE LENGTH=480;AT3G29360.1 | Symbols: | UDP-glucose 6-dehydrogenase family protein | chr3:11267375-11268817 REVERSE LENGTH=480
3	3	3		AT3G29320.1	AT3G29320.1	AT3G29320.1 | Symbols: | Glycosyl transferase, family 35 | chr3:11252871-11257587 FORWARD LENGTH=962
3	3	3		AT3G29310.1	AT3G29310.1	AT3G29310.1 | Symbols: | calmodulin-binding protein-related | chr3:11249712-11251452 FORWARD LENGTH=551
1	3	2		AT3G28940.1	AT3G28940.1	AT3G28940.1 | Symbols: | AIG2-like (avirulence induced gene) family protein | chr3:10968324-10969311 REVERSE LENGTH=169
2	3	3		AT3G28920.1	AT3G28920.1;AT5G39760.1	AT3G28920.1 | Symbols: AtHB34, HB34, ZHD9 | homeobox protein 34 | chr3:10940598-10941536 REVERSE LENGTH=312
3	3	3		AT3G28730.1	AT3G28730.1	AT3G28730.1 | Symbols: ATHMG, SSRP1, NFD, HMG | high mobility group | chr3:10784954-10788498 FORWARD LENGTH=646
3	3	3		AT3G28710.1;AT3G28715.2	AT3G28710.1;AT3G28715.2	AT3G28710.1 | Symbols: | ATPase, V0/A0 complex, subunit C/D | chr3:10773144-10775594 REVERSE LENGTH=351;AT3G28715.2 | Symbols: | ATPase, V0/A0 complex, subunit C/D | chr3:10778025-10780350 FORWARD LENGTH=343
0	3	2		AT3G28030.1	AT3G28030.1	AT3G28030.1 | Symbols: UVH3, UVR1 | 5-3 exonuclease family protein | chr3:10424321-10431178 FORWARD LENGTH=1479
3	3	3		AT3G27925.1	AT3G27925.1	AT3G27925.1 | Symbols: DEGP1, Deg1 | DegP protease 1 | chr3:10366659-10368864 REVERSE LENGTH=439
3	3	3		AT3G27740.1	AT3G27740.1;AT3G27740.2	AT3G27740.1 | Symbols: CARA | carbamoyl phosphate synthetase A | chr3:10281470-10283792 REVERSE LENGTH=430
1	3	3		AT3G27700.2;AT3G27700.1	AT3G27700.2;AT3G27700.1	AT3G27700.2 | Symbols: | zinc finger (CCCH-type) family protein / RNA recognition motif (RRM)-containing protein | chr3:10257681-10261330 REVERSE LENGTH=908;AT3G27700.1 | Symbols: | zinc finger (CCCH-type) family protein / RNA recognition motif (RRM)-con
3	3	3		AT3G27660.1	AT3G27660.1	AT3G27660.1 | Symbols: OLEO4, OLE3 | oleosin 4 | chr3:10243851-10244821 FORWARD LENGTH=191
1	3	3		AT3G27530.1	AT3G27530.1	AT3G27530.1 | Symbols: GC6, MAG4 | golgin candidate 6 | chr3:10193778-10199659 REVERSE LENGTH=914
1	3	3		AT3G27320.2;AT3G27320.1	AT3G27320.2;AT3G27320.1;AT5G14310.1	AT3G27320.2 | Symbols: | alpha/beta-Hydrolases superfamily protein | chr3:10090307-10092391 FORWARD LENGTH=428;AT3G27320.1 | Symbols: | alpha/beta-Hydrolases superfamily protein | chr3:10090307-10092391 FORWARD LENGTH=460
1	3	3		AT3G27310.1	AT3G27310.1	AT3G27310.1 | Symbols: PUX1 | plant UBX domain-containing protein 1 | chr3:10087360-10089077 REVERSE LENGTH=251
3	3	3		AT3G27300.3;AT3G27300.2;AT3G27300.1	AT3G27300.3;AT3G27300.2;AT3G27300.1	AT3G27300.3 | Symbols: G6PD5 | glucose-6-phosphate dehydrogenase 5 | chr3:10083318-10086288 REVERSE LENGTH=516;AT3G27300.2 | Symbols: G6PD5 | glucose-6-phosphate dehydrogenase 5 | chr3:10083318-10086288 REVERSE LENGTH=516;AT3G27300.1 | Symbols: G6PD5 | glu
3	3	3		AT3G27260.2;AT3G27260.1	AT3G27260.2;AT3G27260.1;AT3G01770.1	AT3G27260.2 | Symbols: GTE8 | global transcription factor group E8 | chr3:10068558-10072403 FORWARD LENGTH=764;AT3G27260.1 | Symbols: GTE8 | global transcription factor group E8 | chr3:10068411-10072403 FORWARD LENGTH=813
3	3	3		AT3G27190.1	AT3G27190.1	AT3G27190.1 | Symbols: UKL2 | uridine kinase-like 2 | chr3:10039504-10042917 REVERSE LENGTH=483
3	3	3		AT3G27160.1	AT3G27160.1	AT3G27160.1 | Symbols: GHS1 | Ribosomal protein S21 family protein | chr3:10017531-10018854 FORWARD LENGTH=183
0	3	2		AT3G26990.1	AT3G26990.1	AT3G26990.1 | Symbols: | ENTH/VHS family protein | chr3:9948426-9951557 REVERSE LENGTH=513
3	3	1		AT3G26780.1	AT3G26780.1	AT3G26780.1 | Symbols: | Phosphoglycerate mutase family protein | chr3:9848747-9850277 FORWARD LENGTH=399
3	3	3		AT3G26770.1	AT3G26770.1	AT3G26770.1 | Symbols: | NAD(P)-binding Rossmann-fold superfamily protein | chr3:9845494-9847079 FORWARD LENGTH=306
3	3	3		AT3G26710.1	AT3G26710.1	AT3G26710.1 | Symbols: CCB1 | cofactor assembly of complex C | chr3:9813550-9814606 FORWARD LENGTH=267
3	3	3		AT3G26650.1	AT3G26650.1	AT3G26650.1 | Symbols: GAPA, GAPA-1 | glyceraldehyde 3-phosphate dehydrogenase A subunit | chr3:9795226-9796848 FORWARD LENGTH=396
3	3	3		AT3G26560.1	AT3G26560.1	AT3G26560.1 | Symbols: | ATP-dependent RNA helicase, putative | chr3:9750122-9753719 REVERSE LENGTH=1168
3	3	3		AT3G26520.1	AT3G26520.1	AT3G26520.1 | Symbols: TIP2, SITIP, GAMMA-TIP2, TIP1;2 | tonoplast intrinsic protein 2 | chr3:9722770-9723703 REVERSE LENGTH=253
3	3	3		AT3G26420.1	AT3G26420.1	AT3G26420.1 | Symbols: ATRZ-1A | RNA-binding (RRM/RBD/RNP motifs) family protein with retrovirus zinc finger-like domain | chr3:9671953-9673055 FORWARD LENGTH=245
3	3	3		AT3G26400.1	AT3G26400.1	AT3G26400.1 | Symbols: EIF4B1 | eukaryotic translation initiation factor 4B1 | chr3:9666616-9669081 FORWARD LENGTH=532
3	3	3		AT3G26060.1;AT3G26060.2	AT3G26060.1;AT3G26060.2	AT3G26060.1 | Symbols: ATPRX Q | Thioredoxin superfamily protein | chr3:9524807-9526123 FORWARD LENGTH=216;AT3G26060.2 | Symbols: ATPRX Q | Thioredoxin superfamily protein | chr3:9524807-9526123 FORWARD LENGTH=217
3	3	3		AT3G26030.1	AT3G26030.1	AT3G26030.1 | Symbols: ATB DELTA | serine/threonine protein phosphatase 2A 55 kDa regulatory subunit B prime delta | chr3:9517741-9519260 FORWARD LENGTH=477
3	3	3		AT3G25920.1	AT3G25920.1	AT3G25920.1 | Symbols: RPL15 | ribosomal protein L15 | chr3:9491268-9492558 REVERSE LENGTH=277
3	3	3		AT3G25860.1	AT3G25860.1	AT3G25860.1 | Symbols: LTA2, PLE2 | 2-oxoacid dehydrogenases acyltransferase family protein | chr3:9460632-9462585 FORWARD LENGTH=480
2	3	3		AT3G25840.1;AT3G25840.2	AT3G25840.1;AT3G25840.2;AT3G53640.1	AT3G25840.1 | Symbols: | Protein kinase superfamily protein | chr3:9452993-9457446 REVERSE LENGTH=935;AT3G25840.2 | Symbols: | Protein kinase superfamily protein | chr3:9452993-9456322 REVERSE LENGTH=673
3	3	3		AT3G25800.1;AT3G25800.2	AT3G25800.1;AT3G25800.2	AT3G25800.1 | Symbols: PDF1, PR 65, PP2AA2 | protein phosphatase 2A subunit A2 | chr3:9422822-9425783 REVERSE LENGTH=587;AT3G25800.2 | Symbols: PDF1, PR 65, PP2AA2 | protein phosphatase 2A subunit A2 | chr3:9423036-9425783 REVERSE LENGTH=544
3	3	3		AT3G25690.2;AT3G25690.1;AT3G25690.3	AT3G25690.2;AT3G25690.1;AT3G25690.3	AT3G25690.2 | Symbols: CHUP1 | Hydroxyproline-rich glycoprotein family protein | chr3:9354061-9357757 FORWARD LENGTH=1004;AT3G25690.1 | Symbols: CHUP1 | Hydroxyproline-rich glycoprotein family protein | chr3:9354061-9357757 FORWARD LENGTH=1004;AT3G25690.3
0	3	0		AT3G25545.1	AT3G25545.1	AT3G25545.1 | Symbols: | unknown protein;FUNCTIONS IN: molecular_function unknown;INVOLVED IN: biological_process unknown;LOCATED IN: cellular_component unknown;EXPRESSED IN: 23 plant structures;EXPRESSED DURING: 13 growth stages;Has 38 Blast hits t
3	3	3		AT3G25530.2;AT3G25530.1	AT3G25530.2;AT3G25530.1	AT3G25530.2 | Symbols: GHBDH, ATGHBDH, GLYR1, GR1 | glyoxylate reductase 1 | chr3:9271949-9273514 REVERSE LENGTH=278;AT3G25530.1 | Symbols: GHBDH, ATGHBDH, GLYR1, GR1 | glyoxylate reductase 1 | chr3:9271949-9273514 REVERSE LENGTH=289
3	3	3		AT3G25520.1;AT3G25520.2	AT3G25520.1;AT3G25520.2	AT3G25520.1 | Symbols: ATL5, PGY3, OLI5, RPL5A | ribosomal protein L5 | chr3:9269573-9271327 REVERSE LENGTH=301;AT3G25520.2 | Symbols: ATL5 | ribosomal protein L5 | chr3:9269573-9270434 REVERSE LENGTH=190
3	3	3		AT3G25230.1;AT3G25230.2	AT3G25230.1;AT3G25230.2	AT3G25230.1 | Symbols: ROF1, ATFKBP62, FKBP62 | rotamase FKBP 1 | chr3:9188257-9191137 FORWARD LENGTH=551;AT3G25230.2 | Symbols: ROF1, ATFKBP62, FKBP62 | rotamase FKBP 1 | chr3:9188257-9191175 FORWARD LENGTH=562
3	2	3		AT3G25150.1;AT3G25150.2	AT3G25150.1;AT3G25150.2	AT3G25150.1 | Symbols: | Nuclear transport factor 2 (NTF2) family protein with RNA binding (RRM-RBD-RNP motifs) domain | chr3:9157161-9159362 REVERSE LENGTH=488;AT3G25150.2 | Symbols: | Nuclear transport factor 2 (NTF2) family protein with RNA binding (R
3	3	3		AT3G25070.1	AT3G25070.1	AT3G25070.1 | Symbols: RIN4 | RPM1 interacting protein 4 | chr3:9132458-9133747 FORWARD LENGTH=211
2	3	3		AT3G24870.1;AT3G24880.1;AT3G24870.2	AT3G24870.1;AT3G24880.1;AT3G24870.2	AT3G24870.1 | Symbols: | Helicase/SANT-associated, DNA binding protein | chr3:9075237-9084278 REVERSE LENGTH=1907;AT3G24880.1 | Symbols: | Helicase/SANT-associated, DNA binding protein | chr3:9086457-9095537 REVERSE LENGTH=1957;AT3G24870.2 | Symbols: |
3	3	3		AT3G24830.1	AT3G24830.1	AT3G24830.1 | Symbols: | Ribosomal protein L13 family protein | chr3:9064613-9065871 FORWARD LENGTH=206
3	3	3		AT3G24550.1	AT3G24550.1;AT3G24540.1;AT5G38250.1;AT5G38240.1;AT2G48010.1;AT1G11050.1;AT4G34440.1;AT1G49270.1;AT3G18810.1;AT4G02010.1;AT5G39020.1;AT2G19130.1;AT5G65710.1	AT3G24550.1 | Symbols: ATPERK1, PERK1 | proline extensin-like receptor kinase 1 | chr3:8960411-8963303 FORWARD LENGTH=652
3	1	3		AT3G24530.1	AT3G24530.1	AT3G24530.1 | Symbols: | AAA-type ATPase family protein / ankyrin repeat family protein | chr3:8945678-8947786 REVERSE LENGTH=481
3	3	3		AT3G24503.1	AT3G24503.1	AT3G24503.1 | Symbols: ALDH2C4, ALDH1A, REF1 | aldehyde dehydrogenase 2C4 | chr3:8919732-8923029 REVERSE LENGTH=501
0	3	2		AT3G24490.1	AT3G24490.1	AT3G24490.1 | Symbols: | Alcohol dehydrogenase transcription factor Myb/SANT-like family protein | chr3:8911022-8912023 FORWARD LENGTH=333
3	3	3		AT3G24170.3;AT3G24170.2;AT3G24170.1	AT3G24170.3;AT3G24170.2;AT3G24170.1	AT3G24170.3 | Symbols: ATGR1, GR1 | glutathione-disulfide reductase | chr3:8729762-8734115 REVERSE LENGTH=499;AT3G24170.2 | Symbols: ATGR1, GR1 | glutathione-disulfide reductase | chr3:8729762-8734115 REVERSE LENGTH=499;AT3G24170.1 | Symbols: ATGR1, GR1 |
0	3	3		AT3G24140.1	AT3G24140.1	AT3G24140.1 | Symbols: FMA | basic helix-loop-helix (bHLH) DNA-binding superfamily protein | chr3:8715525-8717772 REVERSE LENGTH=414
0	3	1		AT3G24120.1;AT3G24120.2	AT3G24120.1;AT3G24120.2	AT3G24120.1 | Symbols: | Homeodomain-like superfamily protein | chr3:8705925-8708148 REVERSE LENGTH=295;AT3G24120.2 | Symbols: | Homeodomain-like superfamily protein | chr3:8705925-8708148 REVERSE LENGTH=298
0	3	0		AT3G24080.2;AT3G24080.1	AT3G24080.2;AT3G24080.1	AT3G24080.2 | Symbols: | KRR1 family protein | chr3:8695191-8697107 REVERSE LENGTH=630;AT3G24080.1 | Symbols: | KRR1 family protein | chr3:8695191-8697107 REVERSE LENGTH=638
3	3	3		AT3G23990.1	AT3G23990.1	AT3G23990.1 | Symbols: HSP60, HSP60-3B | heat shock protein 60 | chr3:8669013-8672278 FORWARD LENGTH=577
0	3	0		AT3G23980.1	AT3G23980.1	AT3G23980.1 | Symbols: BLI, KOS1 | BLISTER | chr3:8662818-8667440 REVERSE LENGTH=714
2	3	3		AT3G23920.1	AT3G23920.1	AT3G23920.1 | Symbols: BAM1, BMY7, TR-BAMY | beta-amylase 1 | chr3:8641722-8644199 FORWARD LENGTH=575
3	3	3		AT3G23900.3;AT3G23900.1;AT3G23900.2	AT3G23900.3;AT3G23900.1;AT3G23900.2	AT3G23900.3 | Symbols: | RNA recognition motif (RRM)-containing protein | chr3:8631941-8635852 REVERSE LENGTH=987;AT3G23900.1 | Symbols: | RNA recognition motif (RRM)-containing protein | chr3:8631941-8635852 REVERSE LENGTH=987;AT3G23900.2 | Symbols: |
3	3	3		AT3G23820.1	AT3G23820.1;AT4G00110.1;AT1G02000.1;AT4G12250.1;AT2G45310.1	AT3G23820.1 | Symbols: GAE6 | UDP-D-glucuronate 4-epimerase 6 | chr3:8603645-8605027 FORWARD LENGTH=460
3	3	3		AT3G23810.1	AT3G23810.1	AT3G23810.1 | Symbols: SAHH2, ATSAHH2 | S-adenosyl-l-homocysteine (SAH) hydrolase 2 | chr3:8588013-8589671 REVERSE LENGTH=485
0	3	2		AT3G23800.1	AT3G23800.1	AT3G23800.1 | Symbols: SBP3 | selenium-binding protein 3 | chr3:8581701-8583704 FORWARD LENGTH=480
3	3	3		AT3G23780.2;AT3G23780.1;AT3G18090.1	AT3G23780.2;AT3G23780.1;AT3G18090.1	AT3G23780.2 | Symbols: NRPD2A | nuclear RNA polymerase D2A | chr3:8567971-8573819 REVERSE LENGTH=1172;AT3G23780.1 | Symbols: NRPD2A, DRD2, NRPD2, DMS2, NRPE2 | nuclear RNA polymerase D2A | chr3:8567971-8573819 REVERSE LENGTH=1172;AT3G18090.1 | Symbols: NRP
3	3	3		AT3G23750.1	AT3G23750.1;AT1G66150.1;AT2G01820.1	AT3G23750.1 | Symbols: | Leucine-rich repeat protein kinase family protein | chr3:8558332-8561263 FORWARD LENGTH=928
3	3	3		AT3G23700.1	AT3G23700.1	AT3G23700.1 | Symbols: | Nucleic acid-binding proteins superfamily | chr3:8531689-8533742 REVERSE LENGTH=392
3	3	3		AT3G23620.1	AT3G23620.1	AT3G23620.1 | Symbols: | Ribosomal RNA processing Brix domain protein | chr3:8480147-8481873 FORWARD LENGTH=314
0	3	0		AT3G23580.1	AT3G23580.1	AT3G23580.1 | Symbols: RNR2, RNR2A | ribonucleotide reductase 2A | chr3:8460261-8462574 FORWARD LENGTH=341
3	3	3		AT3G23540.1;AT3G23540.2	AT3G23540.1;AT3G23540.2;AT4G14290.1	AT3G23540.1 | Symbols: | alpha/beta-Hydrolases superfamily protein | chr3:8443665-8448070 FORWARD LENGTH=566;AT3G23540.2 | Symbols: | alpha/beta-Hydrolases superfamily protein | chr3:8445381-8448070 FORWARD LENGTH=423
3	3	3		AT3G23450.1	AT3G23450.1;AT4G14301.1	AT3G23450.1 | Symbols: | unknown protein;FUNCTIONS IN: molecular_function unknown;INVOLVED IN: biological_process unknown;LOCATED IN: endomembrane system;EXPRESSED IN: 14 plant structures;EXPRESSED DURING: 8 growth stages;Has 694543 Blast hits to 47
0	3	0		AT3G23280.2	AT3G23280.2	AT3G23280.2 | Symbols: XBAT35 | XB3 ortholog 5 in Arabidopsis thaliana | chr3:8321588-8324109 FORWARD LENGTH=438
3	3	3		AT3G22960.1	AT3G22960.1	AT3G22960.1 | Symbols: PKP1, PKP-ALPHA | Pyruvate kinase family protein | chr3:8139369-8141771 FORWARD LENGTH=596
3	3	3		AT3G22890.1	AT3G22890.1	AT3G22890.1 | Symbols: APS1 | ATP sulfurylase 1 | chr3:8112837-8114734 FORWARD LENGTH=463
3	3	3		AT3G22850.1	AT3G22850.1	AT3G22850.1 | Symbols: | Aluminium induced protein with YGL and LRDR motifs | chr3:8089067-8090275 FORWARD LENGTH=248
3	3	3		AT3G22640.1	AT3G22640.1	AT3G22640.1 | Symbols: PAP85 | cupin family protein | chr3:8011902-8013883 REVERSE LENGTH=486
3	3	3		AT3G22590.1	AT3G22590.1	AT3G22590.1 | Symbols: PHP, CDC73 | PLANT HOMOLOGOUS TO PARAFIBROMIN | chr3:8003999-8005452 FORWARD LENGTH=415
3	3	3		AT3G22380.1;AT3G22380.2	AT3G22380.1;AT3G22380.2	AT3G22380.1 | Symbols: TIC | time for coffee | chr3:7913181-7918879 FORWARD LENGTH=1550;AT3G22380.2 | Symbols: TIC | time for coffee | chr3:7913181-7918967 FORWARD LENGTH=1555
3	3	3		AT3G22330.1	AT3G22330.1	AT3G22330.1 | Symbols: PMH2, ATRH53 | putative mitochondrial RNA helicase 2 | chr3:7892641-7895145 FORWARD LENGTH=616
3	3	3		AT3G22320.1	AT3G22320.1	AT3G22320.1 | Symbols: ATRPABC24.3, RPB5A, NRPB5, NRPD5 | Eukaryotic rpb5 RNA polymerase subunit family protein | chr3:7891045-7892094 REVERSE LENGTH=205
3	3	3		AT3G22310.1	AT3G22310.1	AT3G22310.1 | Symbols: PMH1, ATRH9 | putative mitochondrial RNA helicase 1 | chr3:7887382-7889806 FORWARD LENGTH=610
3	3	3		AT3G22230.1	AT3G22230.1	AT3G22230.1 | Symbols: | Ribosomal L27e protein family | chr3:7844136-7844543 REVERSE LENGTH=135
3	3	3		AT3G22220.2;AT3G22220.1	AT3G22220.2;AT3G22220.1	AT3G22220.2 | Symbols: | hAT transposon superfamily | chr3:7839808-7842358 REVERSE LENGTH=761;AT3G22220.1 | Symbols: | hAT transposon superfamily | chr3:7839808-7842358 REVERSE LENGTH=761
3	3	3		AT3G22200.1;AT3G22200.2	AT3G22200.1;AT3G22200.2	AT3G22200.1 | Symbols: POP2, GABA-T, HER1 | Pyridoxal phosphate (PLP)-dependent transferases superfamily protein | chr3:7835286-7838863 FORWARD LENGTH=504;AT3G22200.2 | Symbols: POP2 | Pyridoxal phosphate (PLP)-dependent transferases superfamily protein |
1	3	3		AT3G22190.2;AT3G22190.1	AT3G22190.2;AT3G22190.1	AT3G22190.2 | Symbols: IQD5 | IQ-domain 5 | chr3:7831280-7833512 REVERSE LENGTH=422;AT3G22190.1 | Symbols: IQD5 | IQ-domain 5 | chr3:7831280-7833512 REVERSE LENGTH=422
3	3	3		AT3G22170.2;AT3G22170.1	AT3G22170.2;AT3G22170.1	AT3G22170.2 | Symbols: FHY3 | far-red elongated hypocotyls 3 | chr3:7822359-7825414 REVERSE LENGTH=839;AT3G22170.1 | Symbols: FHY3 | far-red elongated hypocotyls 3 | chr3:7822359-7825414 REVERSE LENGTH=839
3	3	3		AT3G22110.1	AT3G22110.1;AT4G15165.1	AT3G22110.1 | Symbols: PAC1 | 20S proteasome alpha subunit C1 | chr3:7792819-7793571 REVERSE LENGTH=250
3	3	3		AT3G21865.1	AT3G21865.1	AT3G21865.1 | Symbols: PEX22 | peroxin 22 | chr3:7701308-7703218 REVERSE LENGTH=283
3	3	3		AT3G21810.1	AT3G21810.1	AT3G21810.1 | Symbols: | Zinc finger C-x8-C-x5-C-x3-H type family protein | chr3:7684852-7688360 FORWARD LENGTH=437
0	3	1		AT3G21790.1	AT3G21790.1	AT3G21790.1 | Symbols: | UDP-Glycosyltransferase superfamily protein | chr3:7676927-7678414 REVERSE LENGTH=495
3	3	3		AT3G21720.1	AT3G21720.1	AT3G21720.1 | Symbols: ICL | isocitrate lyase | chr3:7652789-7655873 REVERSE LENGTH=576
3	3	3		AT3G21540.1	AT3G21540.1	AT3G21540.1 | Symbols: | transducin family protein / WD-40 repeat family protein | chr3:7586100-7590856 REVERSE LENGTH=955
0	3	3		AT3G21430.2	AT3G21430.2	AT3G21430.2 | Symbols: ATALY3, ALY3 | DNA binding | chr3:7544800-7552841 REVERSE LENGTH=1132
2	3	3		AT3G21360.1	AT3G21360.1	AT3G21360.1 | Symbols: | 2-oxoglutarate (2OG) and Fe(II)-dependent oxygenase superfamily protein | chr3:7522865-7524036 FORWARD LENGTH=330
0	3	1		AT3G21295.1	AT3G21295.1	AT3G21295.1 | Symbols: | Tudor/PWWP/MBT superfamily protein | chr3:7489635-7492296 FORWARD LENGTH=645
0	3	3		AT3G21290.1	AT3G21290.1	AT3G21290.1 | Symbols: | dentin sialophosphoprotein-related | chr3:7482318-7488676 FORWARD LENGTH=1192
0	3	0		AT3G21270.1	AT3G21270.1;AT1G51700.1	AT3G21270.1 | Symbols: ADOF2, DOF2 | DOF zinc finger protein 2 | chr3:7474934-7475548 FORWARD LENGTH=204
3	3	3		AT3G21220.1;AT1G51660.1	AT3G21220.1;AT1G51660.1	AT3G21220.1 | Symbols: ATMKK5, ATMAP2K_ALPHA, MAP2K_A, MKK5, ATMEK5, MEK5 | MAP kinase kinase 5 | chr3:7445917-7446963 FORWARD LENGTH=348;AT1G51660.1 | Symbols: ATMKK4, MKK4, ATMEK4 | mitogen-activated protein kinase kinase 4 | chr1:19154575-19155675 FORWA
3	3	3		AT3G21200.1	AT3G21200.1	AT3G21200.1 | Symbols: PGR7 | proton gradient regulation 7 | chr3:7436091-7437845 FORWARD LENGTH=317
0	3	3		AT3G21070.2;AT3G21070.1	AT3G21070.2;AT3G21070.1	AT3G21070.2 | Symbols: NADK1 | NAD kinase 1 | chr3:7380434-7383874 REVERSE LENGTH=524;AT3G21070.1 | Symbols: NADK1, ATNADK-1 | NAD kinase 1 | chr3:7380434-7383874 REVERSE LENGTH=530
3	3	3		AT3G21060.1	AT3G21060.1	AT3G21060.1 | Symbols: | Transducin/WD40 repeat-like superfamily protein | chr3:7377822-7379942 FORWARD LENGTH=547
3	3	3		AT3G20820.1	AT3G20820.1	AT3G20820.1 | Symbols: | Leucine-rich repeat (LRR) family protein | chr3:7280930-7282027 FORWARD LENGTH=365
3	3	3		AT3G20810.3;AT3G20810.1;AT3G20810.2	AT3G20810.3;AT3G20810.1;AT3G20810.2	AT3G20810.3 | Symbols: JMJD5 | 2-oxoglutarate (2OG) and Fe(II)-dependent oxygenase superfamily protein | chr3:7275814-7278182 FORWARD LENGTH=398;AT3G20810.1 | Symbols: JMJD5 | 2-oxoglutarate (2OG) and Fe(II)-dependent oxygenase superfamily protein | chr3:7
3	3	3		AT3G20780.1	AT3G20780.1	AT3G20780.1 | Symbols: ATTOP6B, BIN3, HYP6, RHL3, TOP6B | topoisomerase 6 subunit B | chr3:7264025-7268498 REVERSE LENGTH=670
0	3	2		AT3G20770.1	AT3G20770.1	AT3G20770.1 | Symbols: EIN3, AtEIN3 | Ethylene insensitive 3 family protein | chr3:7260702-7262588 REVERSE LENGTH=628
3	3	3		AT3G20650.2;AT3G20650.1	AT3G20650.2;AT3G20650.1	AT3G20650.2 | Symbols: | mRNA capping enzyme family protein | chr3:7221168-7223939 REVERSE LENGTH=369;AT3G20650.1 | Symbols: | mRNA capping enzyme family protein | chr3:7221168-7223939 REVERSE LENGTH=370
3	3	3		AT3G20630.1	AT3G20630.1	AT3G20630.1 | Symbols: UBP14, TTN6, ATUBP14, PER1 | ubiquitin-specific protease 14 | chr3:7203001-7208340 REVERSE LENGTH=797
2	3	3		AT3G20550.1	AT3G20550.1	AT3G20550.1 | Symbols: DDL | SMAD/FHA domain-containing protein | chr3:7174695-7177600 REVERSE LENGTH=314
3	3	3		AT3G20330.1	AT3G20330.1	AT3G20330.1 | Symbols: PYRB | PYRIMIDINE B | chr3:7090354-7091904 REVERSE LENGTH=390
3	3	3		AT3G20050.1	AT3G20050.1	AT3G20050.1 | Symbols: ATTCP-1, TCP-1 | T-complex protein 1 alpha subunit | chr3:6998544-7002266 REVERSE LENGTH=545
3	3	3		AT3G20000.1	AT3G20000.1	AT3G20000.1 | Symbols: TOM40 | translocase of the outer mitochondrial membrane 40 | chr3:6967685-6970247 FORWARD LENGTH=309
3	3	3		AT3G19960.1;AT3G19960.2;AT1G50360.1	AT3G19960.1;AT3G19960.2;AT1G50360.1	AT3G19960.1 | Symbols: ATM1 | myosin 1 | chr3:6949787-6956736 FORWARD LENGTH=1166;AT3G19960.2 | Symbols: ATM1 | myosin 1 | chr3:6949787-6956736 FORWARD LENGTH=1176;AT1G50360.1 | Symbols: VIIIA, ATVIIIA | P-loop containing nucleoside triphosphate hydrolases
2	3	3		AT3G19895.1	AT3G19895.1	AT3G19895.1 | Symbols: | RING/U-box superfamily protein | chr3:6917530-6921211 REVERSE LENGTH=554
1	3	3		AT3G19840.1	AT3G19840.1	AT3G19840.1 | Symbols: ATPRP40C, PRP40C | pre-mRNA-processing protein 40C | chr3:6891228-6897227 FORWARD LENGTH=835
3	3	3		AT3G19820.3;AT3G19820.2;AT3G19820.1	AT3G19820.3;AT3G19820.2;AT3G19820.1	AT3G19820.3 | Symbols: DWF1 | cell elongation protein / DWARF1 / DIMINUTO (DIM) | chr3:6879835-6881616 REVERSE LENGTH=561;AT3G19820.2 | Symbols: DWF1, DIM, EVE1, DIM1, CBB1 | cell elongation protein / DWARF1 / DIMINUTO (DIM) | chr3:6879835-6881616 REVERSE
3	3	3		AT3G19760.1	AT3G19760.1;AT1G51380.1	AT3G19760.1 | Symbols: EIF4A-III | eukaryotic initiation factor 4A-III | chr3:6863790-6866242 FORWARD LENGTH=408
0	3	1		AT3G19520.2;AT3G19520.1	AT3G19520.2;AT3G19520.1	AT3G19520.2 | Symbols: | Protein of unknown function (DUF626) | chr3:6772773-6774209 FORWARD LENGTH=312;AT3G19520.1 | Symbols: | Protein of unknown function (DUF626) | chr3:6772773-6774209 FORWARD LENGTH=312
0	3	3		AT3G19510.1	AT3G19510.1	AT3G19510.1 | Symbols: HAT3.1 | Homeodomain-like protein with RING/FYVE/PHD-type zinc finger domain | chr3:6763205-6766049 REVERSE LENGTH=723
3	3	3		AT3G19450.1	AT3G19450.1	AT3G19450.1 | Symbols: CAD4, ATCAD4, CAD, CAD-C | GroES-like zinc-binding alcohol dehydrogenase family protein | chr3:6744859-6747005 FORWARD LENGTH=365
3	3	3		AT3G19420.1	AT3G19420.1	AT3G19420.1 | Symbols: ATPEN2, PEN2 | PTEN 2 | chr3:6731824-6735354 FORWARD LENGTH=611
0	3	1		AT3G19290.1;AT3G19290.3;AT3G19290.2	AT3G19290.1;AT3G19290.3;AT3G19290.2	AT3G19290.1 | Symbols: ABF4, AREB2 | ABRE binding factor 4 | chr3:6687956-6689784 FORWARD LENGTH=431;AT3G19290.3 | Symbols: ABF4 | ABRE binding factor 4 | chr3:6687956-6689784 FORWARD LENGTH=432;AT3G19290.2 | Symbols: ABF4, AREB2 | ABRE binding factor 4 |
2	3	3		AT3G19240.1	AT3G19240.1	AT3G19240.1 | Symbols: | Vacuolar import/degradation, Vid27-related protein | chr3:6664383-6666423 FORWARD LENGTH=648
3	3	3		AT3G19170.1;AT3G19170.2	AT3G19170.1;AT3G19170.2	AT3G19170.1 | Symbols: ATPREP1, ATZNMP, PREP1 | presequence protease 1 | chr3:6625578-6631874 REVERSE LENGTH=1080;AT3G19170.2 | Symbols: PREP1 | presequence protease 1 | chr3:6625578-6631874 REVERSE LENGTH=1069
3	3	3		AT3G19130.1	AT3G19130.1	AT3G19130.1 | Symbols: ATRBP47B, RBP47B | RNA-binding protein 47B | chr3:6611398-6613823 REVERSE LENGTH=435
1	3	3		AT3G19080.1	AT3G19080.1	AT3G19080.1 | Symbols: | SWIB complex BAF60b domain-containing protein | chr3:6596082-6598667 FORWARD LENGTH=462
1	3	3		AT3G19010.3;AT3G19010.1;AT3G19010.2	AT3G19010.3;AT3G19010.1;AT3G19010.2	AT3G19010.3 | Symbols: | 2-oxoglutarate (2OG) and Fe(II)-dependent oxygenase superfamily protein | chr3:6556306-6557862 REVERSE LENGTH=319;AT3G19010.1 | Symbols: | 2-oxoglutarate (2OG) and Fe(II)-dependent oxygenase superfamily protein | chr3:6556306-655
1	3	2		AT3G19000.1;AT3G19000.2	AT3G19000.1;AT3G19000.2	AT3G19000.1 | Symbols: | 2-oxoglutarate (2OG) and Fe(II)-dependent oxygenase superfamily protein | chr3:6553668-6554987 REVERSE LENGTH=352;AT3G19000.2 | Symbols: | 2-oxoglutarate (2OG) and Fe(II)-dependent oxygenase superfamily protein | chr3:6554004-655
3	3	3		AT3G18990.1	AT3G18990.1	AT3G18990.1 | Symbols: VRN1, REM39 | AP2/B3-like transcriptional factor family protein | chr3:6549077-6551568 REVERSE LENGTH=341
3	3	3		AT3G18860.1;AT3G18860.2	AT3G18860.1;AT3G18860.2	AT3G18860.1 | Symbols: | transducin family protein / WD-40 repeat family protein | chr3:6501774-6508352 FORWARD LENGTH=760;AT3G18860.2 | Symbols: | transducin family protein / WD-40 repeat family protein | chr3:6501774-6508352 FORWARD LENGTH=760
3	3	3		AT3G18820.1	AT3G18820.1;AT3G16100.1;AT1G52280.1	AT3G18820.1 | Symbols: ATRABG3F, ATRAB7B, RAB71, RABG3F, RAB7B | RAB GTPase homolog G3F | chr3:6484266-6486005 FORWARD LENGTH=206
1	3	3		AT3G18790.1	AT3G18790.1	AT3G18790.1 | Symbols: | FUNCTIONS IN: molecular_function unknown;INVOLVED IN: biological_process unknown;LOCATED IN: chloroplast;EXPRESSED IN: 22 plant structures;EXPRESSED DURING: 13 growth stages;CONTAINS InterPro DOMAIN/s: Isy1-like splicing (Int
3	3	3		AT3G18780.2;AT1G49240.1;AT3G18780.1	AT3G18780.2;AT1G49240.1;AT3G18780.1	AT3G18780.2 | Symbols: ACT2, DER1, LSR2, ENL2 | actin 2 | chr3:6475535-6476832 FORWARD LENGTH=377;AT1G49240.1 | Symbols: ACT8 | actin 8 | chr1:18216539-18217947 FORWARD LENGTH=377;AT3G18780.1 | Symbols: ACT2, DER1, LSR2, ENL2 | actin 2 | chr3:6475535-64767
3	3	3		AT3G18740.1;AT1G36240.1	AT3G18740.1;AT1G36240.1	AT3G18740.1 | Symbols: | Ribosomal protein L7Ae/L30e/S12e/Gadd45 family protein | chr3:6453437-6453870 FORWARD LENGTH=112;AT1G36240.1 | Symbols: | Ribosomal protein L7Ae/L30e/S12e/Gadd45 family protein | chr1:13614890-13616233 FORWARD LENGTH=112
3	3	3		AT3G18640.1	AT3G18640.1	AT3G18640.1 | Symbols: | Zinc finger C-x8-C-x5-C-x3-H type family protein | chr3:6413617-6415829 REVERSE LENGTH=676
3	3	3		AT3G18600.1	AT3G18600.1	AT3G18600.1 | Symbols: | P-loop containing nucleoside triphosphate hydrolases superfamily protein | chr3:6399724-6403007 REVERSE LENGTH=568
3	3	3		AT3G18520.1;AT3G18520.2	AT3G18520.1;AT3G18520.2	AT3G18520.1 | Symbols: HDA15, ATHDA15 | histone deacetylase 15 | chr3:6361605-6365367 FORWARD LENGTH=552;AT3G18520.2 | Symbols: HDA15, ATHDA15 | histone deacetylase 15 | chr3:6361605-6365399 FORWARD LENGTH=564
3	3	3		AT3G18490.1	AT3G18490.1	AT3G18490.1 | Symbols: | Eukaryotic aspartyl protease family protein | chr3:6349090-6350592 REVERSE LENGTH=500
3	3	3		AT3G18390.1	AT3G18390.1	AT3G18390.1 | Symbols: EMB1865 | CRS1 / YhbY (CRM) domain-containing protein | chr3:6313572-6317584 FORWARD LENGTH=848
2	3	3		AT3G18380.1;AT3G18380.2;AT3G18380.3	AT3G18380.1;AT3G18380.2;AT3G18380.3	AT3G18380.1 | Symbols: | sequence-specific DNA binding transcription factors;sequence-specific DNA binding | chr3:6311002-6313181 REVERSE LENGTH=348;AT3G18380.2 | Symbols: | sequence-specific DNA binding transcription factors;sequence-specific DNA bindin
2	3	3		AT3G18210.2;AT3G18210.1	AT3G18210.2;AT3G18210.1	AT3G18210.2 | Symbols: | 2-oxoglutarate (2OG) and Fe(II)-dependent oxygenase superfamily protein | chr3:6238264-6240396 REVERSE LENGTH=394;AT3G18210.1 | Symbols: | 2-oxoglutarate (2OG) and Fe(II)-dependent oxygenase superfamily protein | chr3:6238264-624
3	3	3		AT3G18190.1	AT3G18190.1	AT3G18190.1 | Symbols: | TCP-1/cpn60 chaperonin family protein | chr3:6232226-6233836 FORWARD LENGTH=536
2	3	1		AT3G18165.1	AT3G18165.1	AT3G18165.1 | Symbols: MOS4 | modifier of snc1,4 | chr3:6223248-6225076 FORWARD LENGTH=253
1	3	3		AT3G18140.1;AT3G18140.2	AT3G18140.1;AT3G18140.2;AT2G22040.1	AT3G18140.1 | Symbols: | Transducin/WD40 repeat-like superfamily protein | chr3:6212743-6214567 REVERSE LENGTH=305;AT3G18140.2 | Symbols: | Transducin/WD40 repeat-like superfamily protein | chr3:6213225-6214567 REVERSE LENGTH=224
3	3	3		AT3G18130.1	AT3G18130.1	AT3G18130.1 | Symbols: RACK1C_AT | receptor for activated C kinase 1C | chr3:6211109-6212371 REVERSE LENGTH=326
3	3	3		AT3G18080.1	AT3G18080.1;AT3G18070.2;AT3G18070.1	AT3G18080.1 | Symbols: BGLU44 | B-S glucosidase 44 | chr3:6191586-6194124 FORWARD LENGTH=512
3	3	3		AT3G18060.1	AT3G18060.1	AT3G18060.1 | Symbols: | transducin family protein / WD-40 repeat family protein | chr3:6183880-6186788 FORWARD LENGTH=609
3	3	3		AT3G18035.1	AT3G18035.1	AT3G18035.1 | Symbols: HON4 | winged-helix DNA-binding transcription factor family protein | chr3:6169384-6171558 REVERSE LENGTH=480
3	3	3		AT3G17970.1	AT3G17970.1	AT3G17970.1 | Symbols: atToc64-III, TOC64-III | translocon at the outer membrane of chloroplasts 64-III | chr3:6148030-6151794 FORWARD LENGTH=589
3	3	3		AT3G17850.1	AT3G17850.1;AT5G62310.1;AT1G45160.1;AT1G45160.2	AT3G17850.1 | Symbols: | Protein kinase superfamily protein | chr3:6109854-6116245 REVERSE LENGTH=1296
1	3	2		AT3G17750.1	AT3G17750.1	AT3G17750.1 | Symbols: | Protein kinase superfamily protein | chr3:6074228-6078428 FORWARD LENGTH=1138
1	3	1		AT3G17590.1;AT3G17590.2	AT3G17590.1;AT3G17590.2	AT3G17590.1 | Symbols: BSH, CHE1 | transcription regulatory protein SNF5, putative (BSH) | chr3:6017313-6019591 REVERSE LENGTH=240;AT3G17590.2 | Symbols: BSH | transcription regulatory protein SNF5, putative (BSH) | chr3:6017313-6019591 REVERSE LENGTH=242
0	3	3		AT3G17520.1	AT3G17520.1	AT3G17520.1 | Symbols: | Late embryogenesis abundant protein (LEA) family protein | chr3:5999462-6000358 REVERSE LENGTH=298
3	3	3		AT3G17390.1	AT3G17390.1	AT3G17390.1 | Symbols: MTO3, SAMS3, MAT4 | S-adenosylmethionine synthetase family protein | chr3:5952484-5953665 REVERSE LENGTH=393
0	3	2		AT3G17330.2;AT3G17330.1	AT3G17330.2;AT3G17330.1	AT3G17330.2 | Symbols: ECT6 | evolutionarily conserved C-terminal region 6 | chr3:5917253-5919068 REVERSE LENGTH=493;AT3G17330.1 | Symbols: ECT6 | evolutionarily conserved C-terminal region 6 | chr3:5917253-5919458 REVERSE LENGTH=595
0	3	3		AT3G17300.1	AT3G17300.1;AT3G17300.2	AT3G17300.1 | Symbols: | unknown protein;Has 48 Blast hits to 48 proteins in 21 species: Archae - 0;Bacteria - 0;Metazoa - 0;Fungi - 0;Plants - 40;Viruses - 0;Other Eukaryotes - 8 (source: NCBI BLink). | chr3:5907616-5908695 FORWARD LENGTH=91
0	3	3		AT3G17160.1	AT3G17160.1	AT3G17160.1 | Symbols: | unknown protein;FUNCTIONS IN: molecular_function unknown;INVOLVED IN: biological_process unknown;LOCATED IN: cellular_component unknown;EXPRESSED IN: 23 plant structures;EXPRESSED DURING: 13 growth stages;Has 54259 Blast hit
3	3	3		AT3G17020.1	AT3G17020.1	AT3G17020.1 | Symbols: | Adenine nucleotide alpha hydrolases-like superfamily protein | chr3:5802728-5804063 REVERSE LENGTH=163
0	3	3		AT3G16857.1;AT3G16857.2	AT3G16857.1;AT3G16857.2;AT4G16110.1	AT3G16857.1 | Symbols: ARR1, RR1 | response regulator 1 | chr3:5756113-5758853 FORWARD LENGTH=669;AT3G16857.2 | Symbols: ARR1, RR1 | response regulator 1 | chr3:5756113-5759139 FORWARD LENGTH=690
3	3	3		AT3G16840.1	AT3G16840.1	AT3G16840.1 | Symbols: | P-loop containing nucleoside triphosphate hydrolases superfamily protein | chr3:5738020-5743042 REVERSE LENGTH=826
3	3	3		AT3G16830.1	AT3G16830.1	AT3G16830.1 | Symbols: TPR2 | TOPLESS-related 2 | chr3:5731709-5737531 FORWARD LENGTH=1131
3	3	3		AT3G16810.1	AT3G16810.1	AT3G16810.1 | Symbols: APUM24, PUM24 | pumilio 24 | chr3:5723436-5727539 REVERSE LENGTH=641
3	3	3		AT3G16780.1	AT3G16780.1	AT3G16780.1 | Symbols: | Ribosomal protein L19e family protein | chr3:5708982-5710249 FORWARD LENGTH=209
1	3	3		AT3G16760.1;AT3G16760.2	AT3G16760.1;AT3G16760.2	AT3G16760.1 | Symbols: | Tetratricopeptide repeat (TPR)-like superfamily protein | chr3:5703213-5705080 FORWARD LENGTH=475;AT3G16760.2 | Symbols: | Tetratricopeptide repeat (TPR)-like superfamily protein | chr3:5703213-5705080 FORWARD LENGTH=456
3	3	3		AT3G16640.1	AT3G16640.1	AT3G16640.1 | Symbols: TCTP | translationally controlled tumor protein | chr3:5669709-5670729 REVERSE LENGTH=168
3	3	3		AT3G16520.3;AT3G16520.2;AT3G16520.1	AT3G16520.3;AT3G16520.2;AT3G16520.1	AT3G16520.3 | Symbols: UGT88A1 | UDP-glucosyl transferase 88A1 | chr3:5619355-5620833 REVERSE LENGTH=462;AT3G16520.2 | Symbols: UGT88A1 | UDP-glucosyl transferase 88A1 | chr3:5618847-5620833 REVERSE LENGTH=446;AT3G16520.1 | Symbols: UGT88A1 | UDP-glucosyl
3	3	3		AT3G16460.2;AT3G16460.1	AT3G16460.2;AT3G16460.1	AT3G16460.2 | Symbols: | Mannose-binding lectin superfamily protein | chr3:5593029-5595522 FORWARD LENGTH=705;AT3G16460.1 | Symbols: | Mannose-binding lectin superfamily protein | chr3:5593029-5595522 FORWARD LENGTH=705
3	3	3		AT3G16420.3;AT3G16420.2;AT3G16420.1	AT3G16420.3;AT3G16420.2;AT3G16420.1;AT3G16430.2;AT3G16430.1	AT3G16420.3 | Symbols: PBP1 | PYK10-binding protein 1 | chr3:5579560-5580674 FORWARD LENGTH=298;AT3G16420.2 | Symbols: PBP1 | PYK10-binding protein 1 | chr3:5579560-5580674 FORWARD LENGTH=298;AT3G16420.1 | Symbols: PBP1, JAL30 | PYK10-binding protein 1 | c
3	3	3		AT3G16400.2;AT3G16400.1	AT3G16400.2;AT3G16400.1;AT3G16390.1	AT3G16400.2 | Symbols: ATMLP-470 | nitrile specifier protein 1 | chr3:5566516-5568330 FORWARD LENGTH=470;AT3G16400.1 | Symbols: ATMLP-470, NSP1, ATNSP1 | nitrile specifier protein 1 | chr3:5566516-5568330 FORWARD LENGTH=470
0	3	2		AT3G16270.1	AT3G16270.1	AT3G16270.1 | Symbols: | ENTH/VHS family protein | chr3:5513701-5516540 FORWARD LENGTH=690
3	3	3		AT3G16260.1	AT3G16260.1	AT3G16260.1 | Symbols: TRZ4 | tRNAse Z4 | chr3:5509397-5513118 FORWARD LENGTH=942
3	3	2		AT3G16230.3;AT3G16230.1;AT3G16230.2	AT3G16230.3;AT3G16230.1;AT3G16230.2	AT3G16230.3 | Symbols: | Predicted eukaryotic LigT | chr3:5500991-5503303 FORWARD LENGTH=409;AT3G16230.1 | Symbols: | Predicted eukaryotic LigT | chr3:5500991-5503303 FORWARD LENGTH=409;AT3G16230.2 | Symbols: | Predicted eukaryotic LigT | chr3:5500563-5
3	3	3		AT3G15980.1;AT3G15980.4;AT3G15980.3;AT3G15980.2;AT3G15980.5	AT3G15980.1;AT3G15980.4;AT3G15980.3;AT3G15980.2;AT3G15980.5	AT3G15980.1 | Symbols: | Coatomer, beta subunit | chr3:5411699-5418313 REVERSE LENGTH=909;AT3G15980.4 | Symbols: | Coatomer, beta subunit | chr3:5411699-5418313 REVERSE LENGTH=914;AT3G15980.3 | Symbols: | Coatomer, beta subunit | chr3:5412015-5418313
3	3	3		AT3G15970.1	AT3G15970.1	AT3G15970.1 | Symbols: | NUP50 (Nucleoporin 50 kDa) protein | chr3:5408982-5410379 REVERSE LENGTH=465
3	3	3		AT3G15880.3;AT3G15880.1;AT3G15880.2	AT3G15880.3;AT3G15880.1;AT3G15880.2	AT3G15880.3 | Symbols: WSIP2 | WUS-interacting protein 2 | chr3:5364792-5371869 REVERSE LENGTH=1125;AT3G15880.1 | Symbols: WSIP2, TPR4 | WUS-interacting protein 2 | chr3:5364792-5371869 REVERSE LENGTH=1135;AT3G15880.2 | Symbols: WSIP2, TPR4 | WUS-interacti
1	3	3		AT3G15790.1	AT3G15790.1	AT3G15790.1 | Symbols: MBD11, ATMBD11 | methyl-CPG-binding domain 11 | chr3:5343209-5344386 FORWARD LENGTH=254
3	3	3		AT3G15730.1	AT3G15730.1;AT5G25370.1	AT3G15730.1 | Symbols: PLDALPHA1, PLD | phospholipase D alpha 1 | chr3:5330835-5333474 FORWARD LENGTH=810
3	3	3		AT3G15690.2;AT3G15690.1	AT3G15690.2;AT3G15690.1	AT3G15690.2 | Symbols: | Single hybrid motif superfamily protein | chr3:5317108-5319435 FORWARD LENGTH=263;AT3G15690.1 | Symbols: | Single hybrid motif superfamily protein | chr3:5317108-5319383 FORWARD LENGTH=247
3	3	3		AT3G15670.1	AT3G15670.1	AT3G15670.1 | Symbols: | Late embryogenesis abundant protein (LEA) family protein | chr3:5310141-5310901 REVERSE LENGTH=225
3	3	3		AT3G15610.1	AT3G15610.1	AT3G15610.1 | Symbols: | Transducin/WD40 repeat-like superfamily protein | chr3:5291076-5292796 REVERSE LENGTH=341
3	2	3		AT3G15590.1	AT3G15590.1	AT3G15590.1 | Symbols: | Tetratricopeptide repeat (TPR)-like superfamily protein | chr3:5275568-5277658 REVERSE LENGTH=610
3	3	3		AT3G15450.1;AT3G15450.3;AT3G15450.2	AT3G15450.1;AT3G15450.3;AT3G15450.2	AT3G15450.1 | Symbols: | Aluminium induced protein with YGL and LRDR motifs | chr3:5213050-5213998 FORWARD LENGTH=253;AT3G15450.3 | Symbols: | Aluminium induced protein with YGL and LRDR motifs | chr3:5213050-5213864 FORWARD LENGTH=186;AT3G15450.2 | Symb
1	3	3		AT3G15260.2;AT3G15260.1	AT3G15260.2;AT3G15260.1	AT3G15260.2 | Symbols: | Protein phosphatase 2C family protein | chr3:5138842-5140242 FORWARD LENGTH=289;AT3G15260.1 | Symbols: | Protein phosphatase 2C family protein | chr3:5138842-5140242 FORWARD LENGTH=289
3	3	3		AT3G15220.1	AT3G15220.1;AT1G53165.2;AT1G53165.1;AT1G53165.3	AT3G15220.1 | Symbols: | Protein kinase superfamily protein | chr3:5126899-5131752 REVERSE LENGTH=690
3	3	3		AT3G15190.1	AT3G15190.1	AT3G15190.1 | Symbols: | chloroplast 30S ribosomal protein S20, putative | chr3:5116216-5117412 FORWARD LENGTH=202
3	3	3		AT3G15010.2;AT3G15010.1	AT3G15010.2;AT3G15010.1	AT3G15010.2 | Symbols: | RNA-binding (RRM/RBD/RNP motifs) family protein | chr3:5052844-5054058 FORWARD LENGTH=404;AT3G15010.1 | Symbols: | RNA-binding (RRM/RBD/RNP motifs) family protein | chr3:5052844-5054058 FORWARD LENGTH=404
3	3	3		AT3G15000.1	AT3G15000.1;AT1G53260.2;AT1G53260.1	AT3G15000.1 | Symbols: | cobalt ion binding | chr3:5050321-5052121 FORWARD LENGTH=395
3	3	3		AT3G14990.1;AT3G14990.3;AT3G14990.2	AT3G14990.1;AT3G14990.3;AT3G14990.2	AT3G14990.1 | Symbols: | Class I glutamine amidotransferase-like superfamily protein | chr3:5047510-5049621 FORWARD LENGTH=392;AT3G14990.3 | Symbols: | Class I glutamine amidotransferase-like superfamily protein | chr3:5047683-5049621 FORWARD LENGTH=369;
3	3	3		AT3G14940.1	AT3G14940.1	AT3G14940.1 | Symbols: ATPPC3, PPC3 | phosphoenolpyruvate carboxylase 3 | chr3:5025584-5029476 FORWARD LENGTH=968
0	3	0		AT3G14910.1	AT3G14910.1	AT3G14910.1 | Symbols: | unknown protein;Has 158 Blast hits to 158 proteins in 77 species: Archae - 0;Bacteria - 0;Metazoa - 104;Fungi - 0;Plants - 33;Viruses - 0;Other Eukaryotes - 21 (source: NCBI BLink). | chr3:5015432-5017566 FORWARD LENGTH=455
1	3	3		AT3G14890.2;AT3G14890.1	AT3G14890.2;AT3G14890.1	AT3G14890.2 | Symbols: | phosphoesterase | chr3:5008751-5013060 FORWARD LENGTH=684;AT3G14890.1 | Symbols: | phosphoesterase | chr3:5008751-5013060 FORWARD LENGTH=694
3	3	3		AT3G14840.2	AT3G14840.2	AT3G14840.2 | Symbols: | Leucine-rich repeat transmembrane protein kinase | chr3:4988271-4993891 FORWARD LENGTH=1020
3	3	3		AT3G14790.1	AT3G14790.1	AT3G14790.1 | Symbols: RHM3, ATRHM3 | rhamnose biosynthesis 3 | chr3:4964791-4966875 FORWARD LENGTH=664
3	3	3		AT3G14600.1	AT3G14600.1	AT3G14600.1 | Symbols: | Ribosomal protein L18ae/LX family protein | chr3:4910773-4911933 FORWARD LENGTH=178
3	3	3		AT3G14420.2;AT3G14420.1;AT3G14420.4;AT3G14420.3;AT3G14420.5;AT3G14420.6	AT3G14420.2;AT3G14420.1;AT3G14420.4;AT3G14420.3;AT3G14420.5;AT3G14420.6;AT4G18360.2	AT3G14420.2 | Symbols: | Aldolase-type TIM barrel family protein | chr3:4821804-4823899 FORWARD LENGTH=367;AT3G14420.1 | Symbols: | Aldolase-type TIM barrel family protein | chr3:4821804-4823899 FORWARD LENGTH=367;AT3G14420.4 | Symbols: | Aldolase-type
3	3	3		AT3G14415.3;AT3G14415.1;AT3G14415.2	AT3G14415.3;AT3G14415.1;AT3G14415.2	AT3G14415.3 | Symbols: | Aldolase-type TIM barrel family protein | chr3:4818667-4820748 FORWARD LENGTH=367;AT3G14415.1 | Symbols: | Aldolase-type TIM barrel family protein | chr3:4818667-4820748 FORWARD LENGTH=367;AT3G14415.2 | Symbols: | Aldolase-type
3	3	3		AT3G14390.1	AT3G14390.1	AT3G14390.1 | Symbols: | Pyridoxal-dependent decarboxylase family protein | chr3:4806771-4808954 FORWARD LENGTH=484
3	3	3		AT3G14310.1;AT1G53830.1	AT3G14310.1;AT1G53830.1;AT3G10720.1;AT4G02320.1;AT2G26440.1;AT1G23200.1;AT1G11580.1;AT1G02810.1;AT3G49220.1;AT3G10720.2;AT4G15980.1	AT3G14310.1 | Symbols: ATPME3, PME3 | pectin methylesterase 3 | chr3:4772214-4775095 REVERSE LENGTH=592;AT1G53830.1 | Symbols: ATPME2, PME2 | pectin methylesterase 2 | chr1:20098562-20100745 FORWARD LENGTH=587
3	3	3		AT3G14180.1	AT3G14180.1	AT3G14180.1 | Symbols: | sequence-specific DNA binding transcription factors | chr3:4707290-4708621 REVERSE LENGTH=443
3	3	3		AT3G14100.1	AT3G14100.1	AT3G14100.1 | Symbols: | RNA-binding (RRM/RBD/RNP motifs) family protein | chr3:4673027-4675950 FORWARD LENGTH=427
3	3	3		AT3G14010.4;AT3G14010.3;AT3G14010.2;AT3G14010.1	AT3G14010.4;AT3G14010.3;AT3G14010.2;AT3G14010.1	AT3G14010.4 | Symbols: CID4 | CTC-interacting domain 4 | chr3:4637164-4640324 FORWARD LENGTH=549;AT3G14010.3 | Symbols: CID4 | CTC-interacting domain 4 | chr3:4637164-4640691 FORWARD LENGTH=595;AT3G14010.2 | Symbols: CID4 | CTC-interacting domain 4 | chr3:
0	3	1		AT3G13940.1	AT3G13940.1	AT3G13940.1 | Symbols: | DNA binding;DNA-directed RNA polymerases | chr3:4600647-4602412 REVERSE LENGTH=442
3	3	3		AT3G13930.1	AT3G13930.1	AT3G13930.1 | Symbols: | Dihydrolipoamide acetyltransferase, long form protein | chr3:4596240-4600143 FORWARD LENGTH=539
3	3	3		AT3G13920.1;AT3G13920.4;AT3G13920.2;AT3G13920.3	AT3G13920.1;AT3G13920.4;AT3G13920.2;AT3G13920.3	AT3G13920.1 | Symbols: EIF4A1, RH4, TIF4A1 | eukaryotic translation initiation factor 4A1 | chr3:4592635-4594128 REVERSE LENGTH=412;AT3G13920.4 | Symbols: EIF4A1 | eukaryotic translation initiation factor 4A1 | chr3:4592635-4594128 REVERSE LENGTH=407;AT3G1
3	3	3		AT3G13870.1;AT3G13870.2	AT3G13870.1;AT3G13870.2	AT3G13870.1 | Symbols: RHD3 | Root hair defective 3 GTP-binding protein (RHD3) | chr3:4565762-4571109 REVERSE LENGTH=802;AT3G13870.2 | Symbols: RHD3 | Root hair defective 3 GTP-binding protein (RHD3) | chr3:4565762-4570261 REVERSE LENGTH=738
3	3	3		AT3G13750.1	AT3G13750.1	AT3G13750.1 | Symbols: BGAL1 | beta galactosidase 1 | chr3:4511192-4515756 FORWARD LENGTH=847
3	3	3		AT3G13670.1	AT3G13670.1	AT3G13670.1 | Symbols: | Protein kinase family protein | chr3:4469434-4473234 FORWARD LENGTH=703
3	3	3		AT3G13570.1	AT3G13570.1	AT3G13570.1 | Symbols: SCL30A, At-SCL30A | SC35-like splicing factor 30A | chr3:4429564-4431602 REVERSE LENGTH=262
3	3	3		AT3G13470.1	AT3G13470.1	AT3G13470.1 | Symbols: | TCP-1/cpn60 chaperonin family protein | chr3:4389685-4392624 FORWARD LENGTH=596
3	3	3		AT3G13460.2;AT3G13460.4;AT3G13460.1;AT3G13460.3	AT3G13460.2;AT3G13460.4;AT3G13460.1;AT3G13460.3;AT1G55500.1;AT1G55500.3;AT1G55500.2;AT5G61020.2;AT5G61020.1	AT3G13460.2 | Symbols: ECT2 | evolutionarily conserved C-terminal region 2 | chr3:4385274-4388220 REVERSE LENGTH=664;AT3G13460.4 | Symbols: ECT2 | evolutionarily conserved C-terminal region 2 | chr3:4385274-4388220 REVERSE LENGTH=666;AT3G13460.1 | Symbols:
0	3	1		AT3G13440.1	AT3G13440.1	AT3G13440.1 | Symbols: | S-adenosyl-L-methionine-dependent methyltransferases superfamily protein | chr3:4378338-4379347 FORWARD LENGTH=278
1	3	3		AT3G13360.1	AT3G13360.1	AT3G13360.1 | Symbols: WIP3 | WPP domain interacting protein 3 | chr3:4338472-4339982 REVERSE LENGTH=459
3	3	3		AT3G13350.1	AT3G13350.1	AT3G13350.1 | Symbols: | HMG (high mobility group) box protein with ARID/BRIGHT DNA-binding domain | chr3:4335721-4337804 REVERSE LENGTH=319
3	3	3		AT3G13300.2;AT3G13300.1	AT3G13300.2;AT3G13300.1	AT3G13300.2 | Symbols: VCS | Transducin/WD40 repeat-like superfamily protein | chr3:4304085-4309949 FORWARD LENGTH=1309;AT3G13300.1 | Symbols: VCS | Transducin/WD40 repeat-like superfamily protein | chr3:4304085-4309949 FORWARD LENGTH=1344
3	3	3		AT3G13290.1	AT3G13290.1;REV__AT5G37610.1	AT3G13290.1 | Symbols: VCR | varicose-related | chr3:4297529-4303113 FORWARD LENGTH=1340
2	3	3		AT3G13235.3;AT3G13235.2;AT3G13235.1	AT3G13235.3;AT3G13235.2;AT3G13235.1	AT3G13235.3 | Symbols: | ubiquitin family protein | chr3:4271492-4274348 REVERSE LENGTH=413;AT3G13235.2 | Symbols: | ubiquitin family protein | chr3:4271492-4274348 REVERSE LENGTH=414;AT3G13235.1 | Symbols: | ubiquitin family protein | chr3:4271492-4274
3	3	3		AT3G13224.1;AT3G13224.2	AT3G13224.1;AT3G13224.2	AT3G13224.1 | Symbols: | RNA-binding (RRM/RBD/RNP motifs) family protein | chr3:4254848-4256014 FORWARD LENGTH=231;AT3G13224.2 | Symbols: | RNA-binding (RRM/RBD/RNP motifs) family protein | chr3:4254848-4256621 FORWARD LENGTH=358
2	3	3		AT3G13200.1	AT3G13200.1	AT3G13200.1 | Symbols: EMB2769 | Cwf15 / Cwc15 cell cycle control family protein | chr3:4242239-4243976 FORWARD LENGTH=230
3	2	3		AT3G13180.1	AT3G13180.1	AT3G13180.1 | Symbols: | NOL1/NOP2/sun family protein / antitermination NusB domain-containing protein | chr3:4236326-4239966 REVERSE LENGTH=523
3	3	3		AT3G13160.1	AT3G13160.1	AT3G13160.1 | Symbols: | Tetratricopeptide repeat (TPR)-like superfamily protein | chr3:4229994-4231178 REVERSE LENGTH=394
3	3	3		AT3G13120.2;AT3G13120.1	AT3G13120.2;AT3G13120.1	AT3G13120.2 | Symbols: | Ribosomal protein S10p/S20e family protein | chr3:4220310-4221526 REVERSE LENGTH=191;AT3G13120.1 | Symbols: | Ribosomal protein S10p/S20e family protein | chr3:4220310-4221526 REVERSE LENGTH=191
2	3	3		AT3G13060.2;AT3G13060.1	AT3G13060.2;AT3G13060.1	AT3G13060.2 | Symbols: ECT5 | evolutionarily conserved C-terminal region 5 | chr3:4180625-4183632 FORWARD LENGTH=634;AT3G13060.1 | Symbols: ECT5 | evolutionarily conserved C-terminal region 5 | chr3:4180625-4183297 FORWARD LENGTH=551
1	3	2		AT3G12990.3;AT3G12990.2;AT3G12990.1	AT3G12990.3;AT3G12990.2;AT3G12990.1	AT3G12990.3 | Symbols: RRP45a | ribonuclease PH45A | chr3:4156345-4157842 FORWARD LENGTH=307;AT3G12990.2 | Symbols: RRP45a | ribonuclease PH45A | chr3:4156345-4157842 FORWARD LENGTH=307;AT3G12990.1 | Symbols: RRP45a | ribonuclease PH45A | chr3:4156345-4157
2	3	3		AT3G12810.1	AT3G12810.1	AT3G12810.1 | Symbols: PIE1, SRCAP, chr13 | SNF2 domain-containing protein / helicase domain-containing protein | chr3:4065636-4073992 FORWARD LENGTH=2055
3	3	3		AT3G12780.1	AT3G12780.1	AT3G12780.1 | Symbols: PGK1 | phosphoglycerate kinase 1 | chr3:4061127-4063140 REVERSE LENGTH=481
2	3	3		AT3G12640.1	AT3G12640.1	AT3G12640.1 | Symbols: | RNA binding (RRM/RBD/RNP motifs) family protein | chr3:4014455-4017675 FORWARD LENGTH=638
3	3	3		AT3G12580.1	AT3G12580.1	AT3G12580.1 | Symbols: HSP70, ATHSP70 | heat shock protein 70 | chr3:3991487-3993689 REVERSE LENGTH=650
3	3	3		AT3G12490.1;AT3G12490.2	AT3G12490.1;AT3G12490.2	AT3G12490.1 | Symbols: ATCYSB, ATCYS6, CYSB | cystatin B | chr3:3960523-3961777 REVERSE LENGTH=201;AT3G12490.2 | Symbols: ATCYSB, ATCYS6, CYSB | cystatin B | chr3:3960523-3961876 REVERSE LENGTH=234
0	3	3		AT3G12480.1	AT3G12480.1	AT3G12480.1 | Symbols: NF-YC11 | nuclear factor Y, subunit C11 | chr3:3958065-3960278 FORWARD LENGTH=293
0	3	2		AT3G12400.1	AT3G12400.1	AT3G12400.1 | Symbols: ELC, ATELC | Ubiquitin-conjugating enzyme/RWD-like protein | chr3:3944600-3945796 REVERSE LENGTH=398
3	3	3		AT3G12390.1	AT3G12390.1	AT3G12390.1 | Symbols: | Nascent polypeptide-associated complex (NAC), alpha subunit family protein | chr3:3942344-3943595 FORWARD LENGTH=203
0	3	3		AT3G12380.1;AT3G12380.2	AT3G12380.1;AT3G12380.2	AT3G12380.1 | Symbols: ATARP5, ARP5 | actin-related protein 5 | chr3:3938309-3941785 REVERSE LENGTH=724;AT3G12380.2 | Symbols: ARP5 | actin-related protein 5 | chr3:3938309-3941785 REVERSE LENGTH=730
3	3	3		AT3G12290.1	AT3G12290.1	AT3G12290.1 | Symbols: | Amino acid dehydrogenase family protein | chr3:3919591-3921326 FORWARD LENGTH=299
3	3	3		AT3G12280.2;AT3G12280.1	AT3G12280.2;AT3G12280.1	AT3G12280.2 | Symbols: RBR1 | retinoblastoma-related 1 | chr3:3913671-3918433 REVERSE LENGTH=1012;AT3G12280.1 | Symbols: RBR1, RBR, RB, ATRBR1, RB1 | retinoblastoma-related 1 | chr3:3913671-3918433 REVERSE LENGTH=1013
3	3	3		AT3G12170.1	AT3G12170.1	AT3G12170.1 | Symbols: | Chaperone DnaJ-domain superfamily protein | chr3:3881021-3882655 FORWARD LENGTH=262
0	3	1		AT3G12140.2;AT3G12140.1;AT3G12140.3	AT3G12140.2;AT3G12140.1;AT3G12140.3	AT3G12140.2 | Symbols: | Emsy N Terminus (ENT)/ plant Tudor-like domains-containing protein | chr3:3868947-3870964 REVERSE LENGTH=327;AT3G12140.1 | Symbols: | Emsy N Terminus (ENT)/ plant Tudor-like domains-containing protein | chr3:3868947-3870964 REVER
3	3	3		AT3G12130.1	AT3G12130.1	AT3G12130.1 | Symbols: | KH domain-containing protein / zinc finger (CCCH type) family protein | chr3:3864486-3866406 REVERSE LENGTH=248
3	3	3		AT3G12080.2;AT3G12080.1	AT3G12080.2;AT3G12080.1	AT3G12080.2 | Symbols: emb2738 | GTP-binding family protein | chr3:3847851-3851677 FORWARD LENGTH=587;AT3G12080.1 | Symbols: emb2738 | GTP-binding family protein | chr3:3847851-3851980 FORWARD LENGTH=663
3	3	3		AT3G12050.1;AT3G12050.2	AT3G12050.1;AT3G12050.2	AT3G12050.1 | Symbols: | Aha1 domain-containing protein | chr3:3839289-3841303 FORWARD LENGTH=360;AT3G12050.2 | Symbols: | Aha1 domain-containing protein | chr3:3839289-3841303 FORWARD LENGTH=321
0	3	1		AT3G12020.1;AT3G12020.2	AT3G12020.1;AT3G12020.2;AT1G21730.1;AT5G06670.1	AT3G12020.1 | Symbols: | P-loop containing nucleoside triphosphate hydrolases superfamily protein | chr3:3827016-3834146 FORWARD LENGTH=965;AT3G12020.2 | Symbols: | P-loop containing nucleoside triphosphate hydrolases superfamily protein | chr3:3827016-3
3	3	3		AT3G11964.1	AT3G11964.1	AT3G11964.1 | Symbols: | RNA binding;RNA binding | chr3:3793957-3806626 REVERSE LENGTH=1896
1	3	2		AT3G11960.1;AT3G11960.2	AT3G11960.1;AT3G11960.2	AT3G11960.1 | Symbols: | Cleavage and polyadenylation specificity factor (CPSF) A subunit protein | chr3:3786431-3793160 FORWARD LENGTH=1379;AT3G11960.2 | Symbols: | Cleavage and polyadenylation specificity factor (CPSF) A subunit protein | chr3:3786431-
0	3	1		AT3G11950.2;AT3G11950.1	AT3G11950.2;AT3G11950.1	AT3G11950.2 | Symbols: | TRAF-like superfamily protein | chr3:3783273-3785098 REVERSE LENGTH=572;AT3G11950.1 | Symbols: | TRAF-like superfamily protein | chr3:3783273-3785098 REVERSE LENGTH=572
3	3	3		AT3G11940.2;AT3G11940.1	AT3G11940.2;AT3G11940.1	AT3G11940.2 | Symbols: ATRPS5A, AML1, RPS5A | ribosomal protein 5A | chr3:3778175-3779354 REVERSE LENGTH=207;AT3G11940.1 | Symbols: ATRPS5A, AML1, RPS5A | ribosomal protein 5A | chr3:3778175-3779354 REVERSE LENGTH=207
2	3	2		AT3G11930.1;AT3G11930.2;AT3G11930.4;AT3G11930.3	AT3G11930.1;AT3G11930.2;AT3G11930.4;AT3G11930.3	AT3G11930.1 | Symbols: | Adenine nucleotide alpha hydrolases-like superfamily protein | chr3:3776371-3777393 FORWARD LENGTH=199;AT3G11930.2 | Symbols: | Adenine nucleotide alpha hydrolases-like superfamily protein | chr3:3776371-3777393 FORWARD LENGTH=20
3	3	3		AT3G11910.2;AT3G11910.1	AT3G11910.2;AT3G11910.1	AT3G11910.2 | Symbols: UBP13 | ubiquitin-specific protease 13 | chr3:3761758-3770290 REVERSE LENGTH=1114;AT3G11910.1 | Symbols: UBP13 | ubiquitin-specific protease 13 | chr3:3761758-3770290 REVERSE LENGTH=1115
3	3	3		AT3G11830.1;AT3G11830.2	AT3G11830.1;AT3G11830.2	AT3G11830.1 | Symbols: | TCP-1/cpn60 chaperonin family protein | chr3:3732734-3736156 FORWARD LENGTH=557;AT3G11830.2 | Symbols: | TCP-1/cpn60 chaperonin family protein | chr3:3732734-3736156 FORWARD LENGTH=555
3	3	2		AT3G11730.1	AT3G11730.1	AT3G11730.1 | Symbols: ATFP8, ATRABD1, RABD1 | Ras-related small GTP-binding family protein | chr3:3709490-3711397 REVERSE LENGTH=205
3	3	3		AT3G11710.1	AT3G11710.1	AT3G11710.1 | Symbols: ATKRS-1 | lysyl-tRNA synthetase 1 | chr3:3702359-3705613 REVERSE LENGTH=626
3	3	3		AT3G11630.1;AT5G06290.1	AT3G11630.1;AT5G06290.1	AT3G11630.1 | Symbols: | Thioredoxin superfamily protein | chr3:3672189-3673937 FORWARD LENGTH=266;AT5G06290.1 | Symbols: 2-Cys Prx B, 2CPB | 2-cysteine peroxiredoxin B | chr5:1919380-1921211 FORWARD LENGTH=273
3	3	3		AT3G11510.1	AT3G11510.1	AT3G11510.1 | Symbols: | Ribosomal protein S11 family protein | chr3:3623757-3624866 REVERSE LENGTH=150
3	3	3		AT3G11450.1	AT3G11450.1	AT3G11450.1 | Symbols: | DnaJ domain;Myb-like DNA-binding domain | chr3:3605459-3607402 REVERSE LENGTH=647
3	3	3		AT3G11400.1;AT3G11400.2	AT3G11400.1;AT3G11400.2;AT5G06000.1	AT3G11400.1 | Symbols: EIF3G1, ATEIF3G1 | eukaryotic translation initiation factor 3G1 | chr3:3578536-3580366 FORWARD LENGTH=294;AT3G11400.2 | Symbols: EIF3G1, ATEIF3G1 | eukaryotic translation initiation factor 3G1 | chr3:3578536-3580366 FORWARD LENGTH=32
2	3	3		AT3G11330.1	AT3G11330.1	AT3G11330.1 | Symbols: PIRL9 | plant intracellular ras group-related LRR 9 | chr3:3552330-3554695 REVERSE LENGTH=499
0	3	0		AT3G11220.1;AT3G11220.2	AT3G11220.1;AT3G11220.2	AT3G11220.1 | Symbols: ELO1 | Paxneb protein-related | chr3:3513830-3515990 REVERSE LENGTH=355;AT3G11220.2 | Symbols: ELO1 | Paxneb protein-related | chr3:3513830-3515990 REVERSE LENGTH=373
3	3	3		AT3G11200.1;AT3G11200.2	AT3G11200.1;AT3G11200.2	AT3G11200.1 | Symbols: AL2 | alfin-like 2 | chr3:3508387-3510418 REVERSE LENGTH=246;AT3G11200.2 | Symbols: AL2 | alfin-like 2 | chr3:3508387-3510195 REVERSE LENGTH=233
3	3	3		AT3G11130.1	AT3G11130.1	AT3G11130.1 | Symbols: | Clathrin, heavy chain | chr3:3482575-3491667 REVERSE LENGTH=1705
1	3	2		AT3G11100.1	AT3G11100.1	AT3G11100.1 | Symbols: | sequence-specific DNA binding transcription factors | chr3:3476490-3477320 REVERSE LENGTH=249
0	3	1		AT3G10760.1;AT5G05090.1	AT3G10760.1;AT5G05090.1;AT2G40970.1;AT5G59570.1;AT3G46640.2;AT3G46640.1;AT3G46640.3;AT2G01760.1;AT1G67710.1;AT4G31920.1;AT2G27070.1;AT2G25180.1;AT5G58080.1;AT5G07210.1	AT3G10760.1 | Symbols: | Homeodomain-like superfamily protein | chr3:3369814-3370821 FORWARD LENGTH=335;AT5G05090.1 | Symbols: | Homeodomain-like superfamily protein | chr5:1503393-1504193 FORWARD LENGTH=266
0	3	3		AT3G10730.1	AT3G10730.1	AT3G10730.1 | Symbols: SUN2, ATSUN2 | SAD1/UNC-84 domain protein 2 | chr3:3358556-3360522 REVERSE LENGTH=455
3	3	3		AT3G10690.1	AT3G10690.1	AT3G10690.1 | Symbols: GYRA | DNA GYRASE A | chr3:3339612-3346243 REVERSE LENGTH=950
3	3	3		AT3G10650.1	AT3G10650.1	AT3G10650.1 | Symbols: | BEST Arabidopsis thaliana protein match is: nucleoporin-related (TAIR:AT5G20200.1);Has 61042 Blast hits to 31782 proteins in 2093 species: Archae - 202;Bacteria - 16480;Metazoa - 16017;Fungi - 12552;Plants - 1653;Viruses - 6
3	3	3		AT3G10610.1;AT2G05220.2;AT2G05220.1;AT5G04800.4;AT5G04800.3;AT5G04800.2;AT5G04800.1;AT2G04390.1	AT3G10610.1;AT2G05220.2;AT2G05220.1;AT5G04800.4;AT5G04800.3;AT5G04800.2;AT5G04800.1;AT2G04390.1	AT3G10610.1 | Symbols: | Ribosomal S17 family protein | chr3:3319459-3319881 FORWARD LENGTH=140;AT2G05220.2 | Symbols: | Ribosomal S17 family protein | chr2:1894757-1895179 REVERSE LENGTH=140;AT2G05220.1 | Symbols: | Ribosomal S17 family protein | chr2:
3	3	3		AT3G10490.2;AT3G10490.1	AT3G10490.2;AT3G10490.1;AT5G39610.1;AT1G54330.1;AT5G07680.2;AT3G29035.1;AT5G07680.1;AT5G18270.2;AT5G18270.1;AT5G61430.1;AT3G04060.1;AT3G10500.1;AT5G04410.1	AT3G10490.2 | Symbols: ANAC052, NAC052 | NAC domain containing protein 52 | chr3:3268075-3270608 FORWARD LENGTH=451;AT3G10490.1 | Symbols: ANAC051 | NAC domain containing protein 52 | chr3:3268075-3269926 FORWARD LENGTH=238
2	3	2		AT3G10480.2;AT3G10480.1;AT3G10480.3	AT3G10480.2;AT3G10480.1;AT3G10480.3	AT3G10480.2 | Symbols: ANAC050, NAC050 | NAC domain containing protein 50 | chr3:3264410-3266781 FORWARD LENGTH=446;AT3G10480.1 | Symbols: ANAC050, NAC050 | NAC domain containing protein 50 | chr3:3264410-3266781 FORWARD LENGTH=447;AT3G10480.3 | Symbols: A
3	3	3		AT3G10420.2;AT3G10420.1	AT3G10420.2;AT3G10420.1	AT3G10420.2 | Symbols: SPD1 | P-loop containing nucleoside triphosphate hydrolases superfamily protein | chr3:3239307-3242274 FORWARD LENGTH=684;AT3G10420.1 | Symbols: SPD1 | P-loop containing nucleoside triphosphate hydrolases superfamily protein | chr3:3
3	3	3		AT3G10410.1	AT3G10410.1	AT3G10410.1 | Symbols: SCPL49, CPY | SERINE CARBOXYPEPTIDASE-LIKE 49 | chr3:3235518-3238063 REVERSE LENGTH=516
0	3	2		AT3G10400.1	AT3G10400.1	AT3G10400.1 | Symbols: | RNA recognition motif and CCHC-type zinc finger domains containing protein | chr3:3232636-3233421 FORWARD LENGTH=261
3	3	3		AT3G10380.1	AT3G10380.1	AT3G10380.1 | Symbols: SEC8, ATSEC8 | subunit of exocyst complex 8 | chr3:3219922-3228356 REVERSE LENGTH=1053
0	3	0		AT3G10250.2;AT3G10250.1;AT5G04090.2	AT3G10250.2;AT3G10250.1;AT5G04090.2;AT5G04090.1	AT3G10250.2 | Symbols: | Plant protein 1589 of unknown function | chr3:3168371-3170418 REVERSE LENGTH=324;AT3G10250.1 | Symbols: | Plant protein 1589 of unknown function | chr3:3168371-3170418 REVERSE LENGTH=324;AT5G04090.2 | Symbols: | Plant protein 15
3	3	3		AT3G10220.1	AT3G10220.1	AT3G10220.1 | Symbols: | tubulin folding cofactor B | chr3:3161977-3164037 FORWARD LENGTH=243
0	3	2		AT3G10070.1	AT3G10070.1	AT3G10070.1 | Symbols: TAF12, TAFII58 | TBP-associated factor 12 | chr3:3104195-3106798 REVERSE LENGTH=539
3	3	3		AT3G10040.1	AT3G10040.1	AT3G10040.1 | Symbols: | sequence-specific DNA binding transcription factors | chr3:3096580-3097875 REVERSE LENGTH=431
0	3	2		AT3G10030.2;AT3G10030.1	AT3G10030.2;AT3G10030.1	AT3G10030.2 | Symbols: | aspartate/glutamate/uridylate kinase family protein | chr3:3092618-3094831 REVERSE LENGTH=520;AT3G10030.1 | Symbols: | aspartate/glutamate/uridylate kinase family protein | chr3:3092277-3094831 REVERSE LENGTH=542
1	3	2		AT3G10020.1;AT3G10020.2	AT3G10020.1;AT3G10020.2	AT3G10020.1 | Symbols: | unknown protein;FUNCTIONS IN: molecular_function unknown;INVOLVED IN: response to oxidative stress, anaerobic respiration;LOCATED IN: cellular_component unknown;EXPRESSED IN: 23 plant structures;EXPRESSED DURING: 13 growth st
1	3	2		AT3G09980.1	AT3G09980.1	AT3G09980.1 | Symbols: | Family of unknown function (DUF662) | chr3:3069358-3071145 FORWARD LENGTH=178
3	3	2		AT3G09850.1	AT3G09850.1	AT3G09850.1 | Symbols: | D111/G-patch domain-containing protein | chr3:3023397-3025742 REVERSE LENGTH=781
3	3	3		AT3G09840.1;AT5G03340.1;AT3G53230.1	AT3G09840.1;AT5G03340.1;AT3G53230.1	AT3G09840.1 | Symbols: CDC48, ATCDC48, CDC48A | cell division cycle 48 | chr3:3019494-3022832 FORWARD LENGTH=809;AT5G03340.1 | Symbols: | ATPase, AAA-type, CDC48 protein | chr5:810091-813133 REVERSE LENGTH=810;AT3G53230.1 | Symbols: | ATPase, AAA-type, C
3	3	3		AT3G09820.1;AT3G09820.2	AT3G09820.1;AT3G09820.2	AT3G09820.1 | Symbols: ADK1, ATADK1 | adenosine kinase 1 | chr3:3012122-3014624 FORWARD LENGTH=344;AT3G09820.2 | Symbols: ADK1 | adenosine kinase 1 | chr3:3012645-3014624 FORWARD LENGTH=302
3	3	3		AT3G09740.1	AT3G09740.1	AT3G09740.1 | Symbols: SYP71, ATSYP71 | syntaxin of plants 71 | chr3:2989615-2991354 FORWARD LENGTH=266
2	3	3		AT3G09720.1	AT3G09720.1	AT3G09720.1 | Symbols: | P-loop containing nucleoside triphosphate hydrolases superfamily protein | chr3:2980483-2983268 REVERSE LENGTH=541
0	3	3		AT3G09670.2;AT3G09670.1	AT3G09670.2;AT3G09670.1	AT3G09670.2 | Symbols: | Tudor/PWWP/MBT superfamily protein | chr3:2966637-2968817 FORWARD LENGTH=726;AT3G09670.1 | Symbols: | Tudor/PWWP/MBT superfamily protein | chr3:2966637-2968817 FORWARD LENGTH=726
3	3	3		AT3G09630.1;AT3G09630.2	AT3G09630.1;AT3G09630.2	AT3G09630.1 | Symbols: | Ribosomal protein L4/L1 family | chr3:2953813-2955444 FORWARD LENGTH=406;AT3G09630.2 | Symbols: | Ribosomal protein L4/L1 family | chr3:2953813-2955444 FORWARD LENGTH=405
0	3	0		AT3G09600.1;AT3G09600.2	AT3G09600.1;AT3G09600.2;AT5G02840.3;AT5G02840.2;AT5G02840.1	AT3G09600.1 | Symbols: | Homeodomain-like superfamily protein | chr3:2946459-2948270 FORWARD LENGTH=298;AT3G09600.2 | Symbols: | Homeodomain-like superfamily protein | chr3:2946459-2948200 FORWARD LENGTH=282
3	3	3		AT3G09500.1	AT3G09500.1;AT3G55170.2;AT3G55170.1	AT3G09500.1 | Symbols: | Ribosomal L29 family protein | chr3:2917047-2917895 FORWARD LENGTH=123
3	3	3		AT3G09440.2;AT3G09440.1	AT3G09440.2;AT3G09440.1	AT3G09440.2 | Symbols: | Heat shock protein 70 (Hsp 70) family protein | chr3:2903434-2905632 REVERSE LENGTH=649;AT3G09440.1 | Symbols: | Heat shock protein 70 (Hsp 70) family protein | chr3:2903434-2905632 REVERSE LENGTH=649
0	3	1		AT3G09350.3;AT3G09350.2;AT3G09350.1	AT3G09350.3;AT3G09350.2;AT3G09350.1	AT3G09350.3 | Symbols: Fes1A | Fes1A | chr3:2871710-2873109 FORWARD LENGTH=327;AT3G09350.2 | Symbols: Fes1A | Fes1A | chr3:2871710-2873109 FORWARD LENGTH=327;AT3G09350.1 | Symbols: Fes1A | Fes1A | chr3:2871216-2873109 FORWARD LENGTH=363
2	3	3		AT3G09300.1	AT3G09300.1	AT3G09300.1 | Symbols: ORP3B | OSBP(oxysterol binding protein)-related protein 3B | chr3:2858068-2860462 FORWARD LENGTH=458
3	3	3		AT3G09260.1	AT3G09260.1	AT3G09260.1 | Symbols: PYK10, PSR3.1, BGLU23, LEB | Glycosyl hydrolase superfamily protein | chr3:2840657-2843730 REVERSE LENGTH=524
3	3	3		AT3G09200.1;AT3G11250.1;AT3G09200.2;AT2G40010.1	AT3G09200.1;AT3G11250.1;AT3G09200.2;AT2G40010.1	AT3G09200.1 | Symbols: | Ribosomal protein L10 family protein | chr3:2823364-2825020 REVERSE LENGTH=320;AT3G11250.1 | Symbols: | Ribosomal protein L10 family protein | chr3:3521453-3522826 FORWARD LENGTH=323;AT3G09200.2 | Symbols: | Ribosomal protein L1
3	3	3		AT3G08943.1;AT3G08947.1	AT3G08943.1;AT3G08947.1	AT3G08943.1 | Symbols: | ARM repeat superfamily protein | chr3:2719198-2721911 REVERSE LENGTH=871;AT3G08947.1 | Symbols: | ARM repeat superfamily protein | chr3:2724007-2726722 FORWARD LENGTH=873
3	3	3		AT3G08940.2;AT3G08940.1	AT3G08940.2;AT3G08940.1	AT3G08940.2 | Symbols: LHCB4.2 | light harvesting complex photosystem II | chr3:2717717-2718665 FORWARD LENGTH=287;AT3G08940.1 | Symbols: LHCB4.2 | light harvesting complex photosystem II | chr3:2717717-2718400 FORWARD LENGTH=227
3	3	3		AT3G08900.1	AT3G08900.1	AT3G08900.1 | Symbols: RGP3, RGP | reversibly glycosylated polypeptide 3 | chr3:2708347-2709714 REVERSE LENGTH=362
1	3	3		AT3G08780.2;AT3G08780.1	AT3G08780.2;AT3G08780.1	AT3G08780.2 | Symbols: | unknown protein;FUNCTIONS IN: molecular_function unknown;INVOLVED IN: biological_process unknown;LOCATED IN: cellular_component unknown;EXPRESSED IN: male gametophyte, cultured cell;EXPRESSED DURING: L mature pollen stage, M
3	3	3		AT3G08740.1	AT3G08740.1	AT3G08740.1 | Symbols: | elongation factor P (EF-P) family protein | chr3:2654788-2656154 REVERSE LENGTH=236
3	3	3		AT3G08590.2;AT3G08590.1	AT3G08590.2;AT3G08590.1	AT3G08590.2 | Symbols: | Phosphoglycerate mutase, 2,3-bisphosphoglycerate-independent | chr3:2608683-2611237 REVERSE LENGTH=560;AT3G08590.1 | Symbols: | Phosphoglycerate mutase, 2,3-bisphosphoglycerate-independent | chr3:2608683-2611237 REVERSE LENGTH=56
3	3	3		AT3G08580.2;AT3G08580.1	AT3G08580.2;AT3G08580.1	AT3G08580.2 | Symbols: AAC1 | ADP/ATP carrier 1 | chr3:2605706-2607030 REVERSE LENGTH=381;AT3G08580.1 | Symbols: AAC1 | ADP/ATP carrier 1 | chr3:2605706-2607030 REVERSE LENGTH=381
3	3	3		AT3G08530.1	AT3G08530.1;REV__AT1G69270.1	AT3G08530.1 | Symbols: | Clathrin, heavy chain | chr3:2587171-2595411 REVERSE LENGTH=1703
3	3	3		AT3G08510.3;AT3G08510.2;AT3G08510.1	AT3G08510.3;AT3G08510.2;AT3G08510.1;AT3G55940.1	AT3G08510.3 | Symbols: | phospholipase C 2 | chr3:2582626-2585556 REVERSE LENGTH=552;AT3G08510.2 | Symbols: ATPLC2, PLC2 | phospholipase C 2 | chr3:2582626-2585556 REVERSE LENGTH=581;AT3G08510.1 | Symbols: ATPLC2, PLC2 | phospholipase C 2 | chr3:2582626-2
3	3	3		AT3G08030.1;AT3G08030.2	AT3G08030.1;AT3G08030.2	AT3G08030.1 | Symbols: | Protein of unknown function, DUF642 | chr3:2564191-2565819 FORWARD LENGTH=365;AT3G08030.2 | Symbols: | Protein of unknown function, DUF642 | chr3:2564517-2565819 FORWARD LENGTH=323
2	3	3		AT3G08020.1	AT3G08020.1	AT3G08020.1 | Symbols: | PHD finger family protein | chr3:2557753-2561534 REVERSE LENGTH=779
3	3	3		AT3G07810.1;AT3G07810.2	AT3G07810.1;AT3G07810.2	AT3G07810.1 | Symbols: | RNA-binding (RRM/RBD/RNP motifs) family protein | chr3:2492875-2495052 FORWARD LENGTH=494;AT3G07810.2 | Symbols: | RNA-binding (RRM/RBD/RNP motifs) family protein | chr3:2492875-2495102 FORWARD LENGTH=495
0	3	3		AT3G07790.1	AT3G07790.1	AT3G07790.1 | Symbols: | DGCR14-related | chr3:2487491-2489017 FORWARD LENGTH=508
3	3	3		AT3G07780.1	AT3G07780.1	AT3G07780.1 | Symbols: OBE1 | Protein of unknown function (DUF1423) | chr3:2485104-2486876 FORWARD LENGTH=566
3	3	3		AT3G07770.1	AT3G07770.1	AT3G07770.1 | Symbols: Hsp89.1, AtHsp90.6, AtHsp90-6 | HEAT SHOCK PROTEIN 89.1 | chr3:2479611-2483970 FORWARD LENGTH=799
2	3	3		AT3G07750.2;AT3G07750.1	AT3G07750.2;AT3G07750.1	AT3G07750.2 | Symbols: | 3-5-exoribonuclease family protein | chr3:2473486-2475218 FORWARD LENGTH=286;AT3G07750.1 | Symbols: | 3-5-exoribonuclease family protein | chr3:2473486-2475218 FORWARD LENGTH=286
0	3	2		AT3G07660.1	AT3G07660.1	AT3G07660.1 | Symbols: | Kinase-related protein of unknown function (DUF1296) | chr3:2445275-2450372 REVERSE LENGTH=841
3	3	3		AT3G07610.1;AT3G07610.3;AT3G07610.2	AT3G07610.1;AT3G07610.3;AT3G07610.2	AT3G07610.1 | Symbols: IBM1 | Transcription factor jumonji (jmjC) domain-containing protein | chr3:2426148-2432876 FORWARD LENGTH=1027;AT3G07610.3 | Symbols: IBM1 | Transcription factor jumonji (jmjC) domain-containing protein | chr3:2426148-2432876 FORWAR
3	3	3		AT3G07480.1	AT3G07480.1	AT3G07480.1 | Symbols: | 2Fe-2S ferredoxin-like superfamily protein | chr3:2389026-2389505 FORWARD LENGTH=159
3	3	3		AT3G07320.1	AT3G07320.1	AT3G07320.1 | Symbols: | O-Glycosyl hydrolases family 17 protein | chr3:2332324-2333925 REVERSE LENGTH=460
3	3	3		AT3G07300.2;AT3G07300.1;AT3G07300.3	AT3G07300.2;AT3G07300.1;AT3G07300.3	AT3G07300.2 | Symbols: | NagB/RpiA/CoA transferase-like superfamily protein | chr3:2324967-2327380 REVERSE LENGTH=407;AT3G07300.1 | Symbols: | NagB/RpiA/CoA transferase-like superfamily protein | chr3:2324967-2327380 REVERSE LENGTH=407;AT3G07300.3 | Symb
3	3	3		AT3G07230.1	AT3G07230.1	AT3G07230.1 | Symbols: | wound-responsive protein-related | chr3:2299920-2300183 FORWARD LENGTH=46
3	3	3		AT3G07220.1	AT3G07220.1;AT3G07260.1	AT3G07220.1 | Symbols: | SMAD/FHA domain-containing protein | chr3:2297968-2299407 FORWARD LENGTH=320
0	3	0		AT3G07170.1	AT3G07170.1	AT3G07170.1 | Symbols: | Sterile alpha motif (SAM) domain-containing protein | chr3:2280428-2282097 FORWARD LENGTH=203
3	3	3		AT3G07160.1	AT3G07160.1	AT3G07160.1 | Symbols: ATGSL10, gsl10, CALS9 | glucan synthase-like 10 | chr3:2265142-2279383 REVERSE LENGTH=1890
3	3	3		AT3G07110.1;AT3G07110.2	AT3G07110.1;AT3G07110.2	AT3G07110.1 | Symbols: | Ribosomal protein L13 family protein | chr3:2252092-2253332 FORWARD LENGTH=206;AT3G07110.2 | Symbols: | Ribosomal protein L13 family protein | chr3:2252092-2253332 FORWARD LENGTH=207
3	3	3		AT3G07100.1	AT3G07100.1	AT3G07100.1 | Symbols: ERMO2, SEC24A | Sec23/Sec24 protein transport family protein | chr3:2245689-2250077 REVERSE LENGTH=1038
0	3	3		AT3G07090.1	AT3G07090.1	AT3G07090.1 | Symbols: | PPPDE putative thiol peptidase family protein | chr3:2243153-2244476 REVERSE LENGTH=265
3	3	3		AT3G07050.1	AT3G07050.1	AT3G07050.1 | Symbols: | GTP-binding family protein | chr3:2229602-2232279 REVERSE LENGTH=582
3	3	3		AT3G07030.1	AT3G07030.1	AT3G07030.1 | Symbols: | Alba DNA/RNA-binding protein | chr3:2223001-2225254 REVERSE LENGTH=405
3	3	3		AT3G07010.1	AT3G07010.1;AT4G13710.2;AT3G24230.1;AT4G13710.1	AT3G07010.1 | Symbols: | Pectin lyase-like superfamily protein | chr3:2212973-2216306 REVERSE LENGTH=416
3	3	3		AT3G06980.1	AT3G06980.1	AT3G06980.1 | Symbols: | DEA(D/H)-box RNA helicase family protein | chr3:2201531-2204662 FORWARD LENGTH=781
[truncated: 1,334 more rows]

## Sheet: enriched with UBQnucTbID
Table 2: Proteins significantly enriched in UBQnucTbID vs. WT samples
[truncated: 2,225 more rows]

[truncated: 6 more sheets: enriched with FAMAnucTbID, published nuclear proteomes, localization prediction, published GC proteome, GO term enrichment, nuclear compartments]
